# Supplementary material for: Integrative analysis of RNA polymerase II and transcriptional dynamics upon MYC activation
Source: Genome Res. 2017 Oct;27(10):1658–64. doi: 10.1101/gr.226035.117 (PMC5630029; doi:10.1101/gr.226035.117)
Supplement: Supplemental Material [file supp_gr.226035.117_Supplemental_Table_S1.xlsx]

## Sheet: Legend
Statistics_AllSystems
#MYCbound	Number of genes bound by MYC at promoters (either in the mycLow or mycHigh conditions)
#DEG	Number of genes differentially expressed (DEG)
%DEG_MYCbound	% of genes differentially expressed that are bound by MYC at promoters (either in the MYClow or MYChigh conditions)
#DEG_MYCbound	# of genes differentially expressed that are bound by MYC at promoters (either in the MYClow or MYChigh conditions)
HTS_statistics_3T9cells
Sample	sample name
Map to exons	number of reads mapperd to exon features
Map to introns	number of reads mapperd to intron features
No feature	number of reads assigned to no feature
Ambiguous	number of reads mapping to multiple features
HTS_data_3T9cells
EntrezID	Entrez ID
GeneSymbol	MGI mouse gene symbol
MYC_TSSshare	Quantification of the MYC signal at promoter regions relative to the total abundance of MYC bound to the genome
RNAPII_TSS	Quantification of the RNAPII signal at promoter regions
RNAPII_GB	Quantification of the RNAPII signal at gene-body regions
RNAPII_TES	Quantification of the RNAPII signal at termination-end-site regions
mature	Quantification of mature mRNA abundance (RPKM)
preMRNA	Quantification of pre-mRNA abundance(RPKM)
synthesis	Quantification of synthesis rate (RPKM/h)
degradation	Quantification of degradation rate (1/h)
processing	Quantification of processing rate (1/h)
_0	untreated condition
_0.17	10 minutes of OHT treatment
_0.33	20 minutes of OHT treatment
_0.5	30 minutes of OHT treatment
_1	1 hour of OHT treatment
_1.5	1.5 hours of OHT treatment
_2	2 hours of OHT treatment
_4	4 hours of OHT treatment
_8	8 hours of OHT treatment
_12	12 hours of OHT treatment
_16	16 hours of OHT treatment

## Sheet: Statistics_AllSystems
	#MYCbound	#DEG	%DEG_MYCbound	#DEG_MYCbound
Eµ-myc lymphomas	10368	4481	0.67	3005
3T9MYC-ER fibroblasts	10642	4748	0.87	4119
tet-MYC liver carcinomas	12353	10172	0.87	8806
P493-6 cells	4108	8767	0.45	3940
U2OStet-MYC cells	7940	6681	0.47	3107
Given the lack of replicates, DEG in the P493-6 cells were identified based on a FoldChange cutoff (|log2FC| >0.5)

## Sheet: HTS_statistics_3T9cells
Sample	Map to exons	Map to introns	No feature	Ambiguous
RNA_total_0min_rep1	44215327	9936928	13596101	1018243
RNA_total_10min_rep1	48682555	10203687	15161495	1075392
RNA_total_20min_rep1	48572236	11305225	15563948	1115027
RNA_total_30min_rep1	47969301	11676797	16401348	1136216
RNA_total_1h_rep1	45601471	11586072	14722232	1103063
RNA_total_1_5h_rep1	54810243	15304506	17172653	1381965
RNA_total_2h_rep1	59796647	14029559	18201339	1407311
RNA_total_4h_rep1	65110201	13320225	18159538	1454548
RNA_total_8h_rep1	47230981	9963924	13839511	1079087
RNA_total_12h_rep1	50983294	11334626	15171199	1199967
RNA_total_16h_rep1	54698600	11288329	17032378	1263990
RNA_total_0min_rep2	44682883	10076979	11746355	1028737
RNA_total_10min_rep2	55936698	12666198	16695582	1287737
RNA_total_20min_rep2	60870694	12142045	15142921	1337002
RNA_total_30min_rep2	70400078	16090222	21736569	1638319
RNA_total_1h_rep2	56039238	10561624	17255960	1210336
RNA_total_1_5h_rep2	55007668	10198030	15326916	1193728
RNA_total_2h_rep2	47043480	9868747	13505350	1067507
RNA_total_4h_rep2	49784900	12907241	16829732	1240223
RNA_total_8h_rep2	51732628	10308611	14361969	1176009
RNA_total_12h_rep2	54280454	10585823	16222552	1239070
RNA_total_16h_rep2	47076911	10794642	16249847	1148279
RNA_total_0min_rep3	62430440	12230354	16929274	1372248
RNA_total_10min_rep3	51475863	9955461	14363177	1135294
RNA_total_20min_rep3	53247098	13278968	14754873	1290103
RNA_total_30min_rep3	61619008	16846743	18640862	1544821
RNA_total_1h_rep3	59189893	10398587	19174999	1264868
RNA_total_1_5h_rep3	54516643	12385981	16014301	1281835
RNA_total_2h_rep3	44077010	8667847	13018355	973024
RNA_total_4h_rep3	64623370	13734568	19189952	1483095
RNA_total_8h_rep3	53187321	10054132	14167573	1187500
RNA_total_12h_rep3	55724372	12864102	15914812	1342488
RNA_total_16h_rep3	47553780	10031164	14697655	1118167
RNA_labeled_0min_rep1	16374911	41329598	8397307	1978091
RNA_labeled_10min_rep1	15016592	37432877	7430514	1801826
RNA_labeled_20min_rep1	18719818	44571245	8731577	2178314
RNA_labeled_30min_rep1	16522810	43569910	8274001	2085659
RNA_labeled_1h_rep1	16814354	44608296	8029068	2118986
RNA_labeled_1_5h_rep1	16584038	43776471	7751329	2085113
RNA_labeled_2h_rep1	16489049	40820768	7378879	1965922
RNA_labeled_4h_rep1	15335175	36859072	7763151	1787192
RNA_labeled_8h_rep1	12882476	31900942	6416523	1539985
RNA_labeled_12h_rep1	13996842	34980830	6824831	1691434
RNA_labeled_16h_rep1	19769147	45788340	9287473	2275700
RNA_labeled_0min_rep2	13411207	38816609	5969427	1836702
RNA_labeled_10min_rep2	14291798	40465672	6646683	1919393
RNA_labeled_20min_rep2	14150979	40873088	6211982	1927761
RNA_labeled_30min_rep2	15451206	45929055	6706378	2171885
RNA_labeled_1h_rep2	12194589	30421017	5509136	1477432
RNA_labeled_1_5h_rep2	15065644	41684325	6405273	2011677
RNA_labeled_2h_rep2	14837508	38319031	6549290	1850481
RNA_labeled_4h_rep2	14012225	39155545	7244195	1864218
RNA_labeled_8h_rep2	14890668	34848920	6861448	1721949
RNA_labeled_12h_rep2	15912442	41715907	8525347	2032419
RNA_labeled_16h_rep2	16024368	41908060	7597830	2021510
RNA_labeled_0min_rep3	10631796	19941180	5357665	1018457
RNA_labeled_10min_rep3	9911022	22436192	5175498	1123836
RNA_labeled_20min_rep3	8941042	21952308	4373782	1073084
RNA_labeled_30min_rep3	9275025	24031166	4678388	1162838
RNA_labeled_1h_rep3	14384380	29801161	8022856	1488839
RNA_labeled_1_5h_rep3	10470757	26705284	6118813	1291510
RNA_labeled_2h_rep3	13202331	31771821	6429056	1537788
RNA_labeled_4h_rep3	13314627	30526719	7674921	1502144
RNA_labeled_8h_rep3	12208306	24398348	6257238	1230764
RNA_labeled_12h_rep3	10650141	24523601	5997373	1215589
RNA_labeled_16h_rep3	13448272	26802240	7173694	1355467

## Sheet: HTS_data_3T9cells
EntrezID	GeneSymbol	MYC_TSSshare_0	MYC_TSSshare_0.17	MYC_TSSshare_0.33	MYC_TSSshare_0.5	MYC_TSSshare_2	MYC_TSSshare_4	RNAPII_TSS_0	RNAPII_TSS_0.17	RNAPII_TSS_0.33	RNAPII_TSS_0.5	RNAPII_TSS_2	RNAPII_TSS_4	RNAPII_GB_0	RNAPII_GB_0.17	RNAPII_GB_0.33	RNAPII_GB_0.5	RNAPII_GB_2	RNAPII_GB_4	RNAPII_TES_0	RNAPII_TES_0.17	RNAPII_TES_0.33	RNAPII_TES_0.5	RNAPII_TES_2	RNAPII_TES_4	mature_0	mature_0.17	mature_0.33	mature_0.5	mature_1	mature_1.5	mature_2	mature_4	mature_8	mature_12	mature_16	preMRNA_0	preMRNA_0.17	preMRNA_0.33	preMRNA_0.5	preMRNA_1	preMRNA_1.5	preMRNA_2	preMRNA_4	preMRNA_8	preMRNA_12	preMRNA_16	synthesis_0	synthesis_0.17
100017	Ldlrap1	1.66927	1.44461	1.34932	1.57141	1.5313	1.42199	3.40236	2.41654	2.5534	2.38157	2.22623	2.77304	0.358257	0.383449	0.316721	0.360656	0.230954	0.292174	0.302163	0.487896	0.496883	0.202276	0.416505	0.24089	4.97206	4.97206	4.97206	4.97206	4.95564	4.58064	4.27241	3.90988	3.33847	3.08546	3.08231	0.326904	0.326904	0.326904	0.326903	0.312084	0.25492	0.254335	0.254328	0.205054	0.202656	0.202654	5.65117	5.65117
100037258	Dnajc3	2.41054	1.52135	1.85448	1.80939	1.59225	1.45645	8.18173	7.17313	3.87371	6.27932	5.12465	5.26877	0.81919	0.752447	0.754572	0.696069	0.913529	1.00767	1.25442	1.13038	1.09856	0.98646	1.34047	1.56341	30.8016	30.7721	30.3428	29.8628	28.7697	28.0566	27.5328	25.143	24.51	24.4895	24.4888	0.466	0.447451	0.405086	0.404381	0.404368	0.404152	0.396669	0.370502	0.370494	0.370494	0.370494	26.4111	24.8692
100038538	Gm10767	1.60196	1.30168	1.00958	1.27503	0.845216	1.11588	9.82873	8.19173	8.76994	7.29651	7.6439	7.95046	0.903387	0.895206	0.575496	0.81556	0.705853	0.820722	0.938995	0.983407	0.820202	0.940895	0.872131	1.01625	0.26404	0.26404	0.26404	0.26404	0.26383	0.242119	0.232517	0.280753	0.271791	0.28076	0.280761	0.554609	0.554609	0.554609	0.554608	0.553843	0.492879	0.503132	0.550734	0.664961	0.752252	0.752259	4.28856	4.28856
100039864	Snhg12	8.6833	5.74284	5.65006	5.62682	5.65154	5.50414	36.2575	33.4524	24.9197	31.4951	33.7737	34.0101	16.3663	14.5899	12.1557	13.7825	12.8643	15.835	14.0626	13.8719	11.4571	11.8348	14.5141	15.3416	44.336	44.2748	43.7734	42.5516	37.5486	36.2131	35.9655	40.5628	48.915	50.1297	50.3114	16.9553	16.7745	16.0509	15.111	15.3803	15.3529	15.4451	15.8251	16.3905	16.7183	16.7703	127.379	123.429
100039968	Gm12942	0.302137	0.282565	0.309514	0.213452	0.169069	0.183072	0.625365	0.136588	0.144298	0.316078	0.0802378	0.740504	1.95883	1.61145	1.5684	1.49209	1.37087	1.33986	0.234235	0.209635	0.223509	0.198719	0.224473	0.227251	1.06691	1.06658	1.05648	1.04761	0.982347	1.01683	1.05326	0.810988	0.713362	0.713351	0.713351	0.315361	0.313533	0.280572	0.2385	0.24195	0.267382	0.270056	0.270282	0.270282	0.270282	0.270282	1.87894	1.81816
100040617	Gm12603	1.8132	1.95053	1.6719	1.76669	1.9202	2.24556	4.99621	5.61484	6.51495	7.79204	4.55063	3.83464	1.36359	1.51537	1.46024	1.68459	1.10964	1.0754	0.698295	0.540823	0.451227	0.491549	0.27736	0.399555	20.2546	20.1666	20.0129	19.8422	19.4517	19.2995	19.3393	20.772	25.1492	27.3522	28.1992	0.819075	0.838331	0.835733	0.832105	0.830157	0.834076	0.841083	0.880852	0.87582	0.820826	0.789989	29.8824	28.994
100040736	Foxd2os	1.36409	0.934717	0.793925	0.963431	0.961155	1.12522	4.16346	3.51586	3.06465	2.57008	2.50559	1.85978	0.392597	0.438999	0.183666	0.269877	0.27865	0.292089	0.325045	0.188566	0.15672	0.215273	0.180569	0.231795	1.78716	1.78125	1.75049	1.6935	1.50546	1.40835	1.3715	1.3499	1.35066	1.35712	1.37065	0.287021	0.28059	0.265683	0.24969	0.225364	0.219565	0.217859	0.216727	0.216971	0.218093	0.220382	5.07309	4.88916
100042970	NA	6.28541	5.18006	4.91776	5.25958	4.73166	5.04445	6.42024	4.61632	4.89623	4.79239	4.7166	4.17865	0.631563	0.513628	0.409522	0.436444	0.4859	0.471929	0.412071	0.277812	0.302789	0.236419	0.24225	0.223161	5.68536	5.63311	5.42779	5.14702	4.54915	4.34815	4.29118	4.2765	4.39151	4.71627	5.24897	0.676751	0.642343	0.588936	0.551806	0.516366	0.510295	0.508756	0.509392	0.524624	0.565387	0.63023	18.7196	17.4494
100043424	Gm14005	3.85602	3.43845	3.84744	3.5625	3.74518	3.46811	7.22501	7.95084	11.5557	11.1442	4.67719	4.39313	0.420476	0.665698	0.768228	0.758165	0.191856	0.20327	0.336052	0.516668	0.399495	0.26557	0.0391796	0.158568	2.64894	2.64955	2.65094	2.65273	2.63708	2.43408	2.18872	2.04036	1.66753	1.33418	1.31101	0.527458	0.526741	0.524706	0.521154	0.490837	0.408442	0.370075	0.341857	0.236106	0.172674	0.157655	7.68976	7.68973
100090	Zbtb48	2.38204	2.63796	2.66991	2.38169	2.83226	2.77221	7.73918	8.16339	11.3193	10.534	8.17093	8.86857	0.862865	1.54648	2.03973	1.85495	1.61505	1.54866	1.99831	3.63617	4.55667	4.66024	3.74967	3.43453	3.44253	3.4464	3.57443	3.81963	4.17475	3.93384	3.81413	3.7619	3.76149	3.76149	3.76149	0.935246	0.952012	1.12288	1.19826	1.10675	1.02465	1.02197	1.0219	1.0219	1.0219	1.0219	8.34252	9.01679
100121	Tdrd7	1.15114	0.94077	1.13098	0.499561	1.10488	0.911569	2.12899	1.42997	1.45283	1.24754	0.657848	0.258412	0.202487	0.19912	0.193795	0.164816	0.155788	0.177441	0.288338	0.26638	0.25657	0.156535	0.206751	0.149146	5.8833	5.88165	5.87287	5.85184	5.68882	5.41656	5.13353	4.38659	3.68838	3.4506	3.37619	0.178554	0.17782	0.176013	0.173082	0.160335	0.149066	0.141775	0.126233	0.109253	0.103916	0.102186	6.79202	6.75657
100129	Gpr153	1.64764	1.65608	1.86033	1.92702	1.35258	1.78231	1.21838	1.8693	1.22385	1.13075	1.05924	1.06715	0.329194	0.486407	0.431517	0.278278	0.259229	0.231269	0.679658	0.877608	0.680186	0.306673	0.69124	0.376503	1.2713	1.2713	1.2713	1.2713	1.27123	1.25757	1.16102	0.874465	0.430592	0.423605	0.423526	0.172269	0.172269	0.172269	0.172269	0.172156	0.158052	0.130842	0.0880327	0.0573921	0.05739	0.05739	1.42397	1.42397
100163	Pafah2	3.24982	2.06873	2.01123	1.59357	1.91809	2.0779	2.32657	2.31863	1.59487	1.08477	1.39038	1.59838	0.322426	0.243969	0.202023	0.0968585	0.198373	0.15168	0.46978	0.249798	0.258989	0.201686	0.160949	0.174058	6.58439	6.53962	6.48246	6.42771	5.93552	5.35127	4.95815	4.33775	4.19689	4.19178	4.1916	0.146947	0.136207	0.135934	0.133687	0.0957541	0.0935999	0.093549	0.0935458	0.0935458	0.0935457	0.0935457	5.45597	5.05293
100169	Phactr4	6.03676	5.34393	5.345	4.96645	4.95761	5.08379	14.9282	12.3197	12.3708	12.3731	10.0404	11.9387	0.71789	0.779741	0.656897	0.648197	0.531374	0.591442	11.9896	10.458	8.24034	9.89737	10.5569	10.7627	6.19804	6.1957	6.17797	6.11943	5.58728	5.06422	4.84049	4.72496	4.73727	4.82258	5.06687	0.416379	0.41543	0.411188	0.400784	0.349789	0.326509	0.320298	0.317334	0.318429	0.324695	0.342102	21.4959	21.4343
100177	Zmym6	5.97332	4.45991	4.34838	4.85748	4.14991	4.68132	7.82195	6.23641	6.50881	7.59018	6.96709	6.40055	0.215966	0.171211	0.125156	0.139089	0.189423	0.206948	1.73545	1.33264	1.3087	1.26542	1.13346	1.19952	3.34461	3.31738	3.24103	3.15067	2.92667	2.80602	2.7553	2.80061	3.09307	3.38606	3.6355	0.254984	0.238893	0.226009	0.21858	0.2096	0.207582	0.207866	0.215902	0.23888	0.260878	0.279415	6.37395	5.8715
100182	Akna	2.50002	2.43798	2.98455	2.43707	2.48606	2.22101	2.11481	2.61493	3.03005	3.33606	3.05204	2.1399	0.488149	0.425255	0.458573	0.4249	0.545984	0.409442	0.593833	0.43277	0.530463	0.463652	0.672483	0.567579	0.673368	0.640899	0.636231	0.662572	0.772209	0.847707	0.891174	0.949368	0.968502	0.972702	0.97432	0.127525	0.127525	0.127525	0.127525	0.127525	0.127525	0.127525	0.127525	0.127525	0.127525	0.127525	3.20281	3.20281
100201	Tmem64	2.2566	2.31987	2.90957	3.10612	2.85238	2.63821	5.9765	6.778	6.65958	7.68898	6.42606	8.40481	0.312739	0.502354	0.611339	0.788369	0.775728	0.776664	0.566239	0.542559	0.907206	1.00025	1.25538	1.15358	12.6554	12.6518	13.1246	14.0662	17.0999	19.5942	21.932	28.5365	31.0331	31.1734	31.1816	0.252735	0.381123	0.545366	0.636183	0.687177	0.688748	0.662507	0.684895	0.68926	0.689402	0.689419	9.62216	11.635
100206	Adprhl2	4.15218	5.09585	5.38711	5.54764	5.6461	5.69396	11.281	13.1007	15.8331	15.9894	12.8212	12.8058	2.08641	2.10361	2.21459	2.27204	2.54409	2.6373	1.7089	1.23199	1.3351	1.34028	1.74875	1.70975	9.22566	9.22566	9.22566	9.22566	9.22457	9.02815	9.22469	11.5845	12.3544	12.3865	12.3878	0.722469	0.722469	0.722469	0.722467	0.722485	0.903007	0.827654	0.802177	0.802643	0.802643	0.802643	7.34125	7.34125
100213	Rusc2	4.01429	3.76861	4.12999	3.76084	4.00425	3.48065	6.30151	5.98827	5.56161	5.58304	4.93056	4.31424	1.08494	1.28394	1.45541	1.27108	0.941972	0.848561	1.31124	1.10948	1.47942	1.15068	1.12696	1.26943	4.07531	4.07531	4.07531	4.07531	4.07509	3.94273	3.48849	3.19106	2.90264	2.38952	2.38831	0.499208	0.499208	0.499208	0.499208	0.498966	0.429806	0.390779	0.390328	0.332611	0.292586	0.292557	8.53566	8.53566
100216455	Gm14124	0.825014	0.58602	0.466021	0.45258	0.212021	0.602	0.568725	0.883887	0.428223	0.413706	0.332259	0.761243	0.0755524	0.165703	0.121104	0.0527134	0.127066	0.127194	0.313368	0.333703	0.294138	0.230522	0.267147	0.33712	4.35925	4.34312	3.59659	3.48116	3.59294	3.66722	3.70317	3.73496	3.73679	3.7368	3.7368	0.315308	0.292944	0.231148	0.232061	0.246772	0.246817	0.246818	0.246818	0.246817	0.246818	0.246818	6.94175	5.91762
100226	Stx12	4.42083	3.74231	3.70553	4.18184	3.96534	3.79716	11.8984	10.2898	11.4502	11.3064	9.15357	9.54344	0.560151	0.534002	0.451429	0.471806	0.424922	0.491035	0.927518	0.982869	0.87447	0.734872	0.677047	0.636606	22.2952	22.2859	21.7789	21.1964	19.9726	19.144	17.8205	16.0259	15.8076	15.8049	15.8049	0.571389	0.558468	0.469936	0.469371	0.469351	0.437041	0.405209	0.405054	0.405054	0.405054	0.405054	24.6474	23.4261
100273	Osbpl9	3.38057	2.52416	2.71637	2.22917	2.68859	2.27199	7.51891	5.86572	6.34939	5.15984	3.62747	4.14228	0.520561	0.471241	0.492438	0.483282	0.445238	0.413818	1.92258	1.85198	2.01181	1.90336	1.69525	1.65658	25.0501	25.0218	24.9295	24.8783	25.3956	25.0327	24.4329	22.0489	20.6603	21.2085	22.095	0.298462	0.293186	0.287052	0.280899	0.264075	0.250735	0.240675	0.221109	0.218605	0.227027	0.236637	22.1468	21.7192
100317	AU040320	4.67364	5.13974	4.91121	5.22756	4.64369	4.86131	12.295	12.9808	12.9154	13.5551	10.3734	11.3714	0.392536	0.315496	0.358601	0.279226	0.28575	0.273133	0.549234	0.394708	0.422589	0.402228	0.363541	0.523244	4.24577	4.24556	4.24024	4.20007	3.80058	3.51323	3.36721	3.23182	3.22928	3.31956	3.45142	0.0910914	0.0910052	0.0896571	0.0832221	0.0697584	0.0691926	0.0691565	0.0691517	0.0693729	0.071831	0.074334	5.96416	5.9567
100340	Smpdl3b	2.355	3.26333	3.37611	3.96751	3.1863	3.68252	1.663	2.68902	3.30488	3.69157	4.10139	4.18646	0.0515414	0.143392	0.206556	0.258605	0.417457	0.429095	1.12291	1.42892	1.94708	2.38458	2.93578	2.71233	5.2275	5.23498	5.28215	5.37773	5.94124	6.8537	8.02864	13.8865	24.1339	30.4443	34.4128	0.072882	0.0870039	0.107277	0.125978	0.170784	0.20773	0.237754	0.296295	0.356019	0.406117	0.442869	3.00251	3.27137
100342	Fam46b	2.94988	2.05437	1.92456	2.07843	1.93876	2.08855	3.87997	2.81932	2.84086	2.32453	2.97187	3.02526	0.887043	0.782794	0.387973	0.548313	0.549924	0.596435	0.699293	0.655185	0.563222	0.321135	0.383161	0.648595	3.82769	3.80287	3.72879	3.6359	3.34714	3.07717	2.83137	2.1346	1.67607	1.58047	1.55029	0.224509	0.200629	0.183088	0.173966	0.158087	0.145342	0.134435	0.10906	0.095271	0.0918899	0.0906138	3.30133	2.80325
100383	Bsdc1	1.79233	1.00369	0.928963	0.743172	1.20556	0.786927	1.71838	1.93496	2.1383	1.27355	1.33089	1.6383	0.332804	0.217941	0.23083	0.249072	0.16474	0.238654	0.685201	0.366563	0.396051	0.491595	0.312718	0.353495	7.13895	7.13662	7.14227	7.11937	6.92312	6.5887	6.18824	5.05695	4.61894	4.83544	5.24312	0.185795	0.184512	0.16371	0.153895	0.140711	0.128055	0.132534	0.130821	0.130252	0.138698	0.151276	5.99263	5.9418
100434	Slc44a1	1.40928	0.937306	0.838341	0.978367	0.98343	0.993221	1.24331	0.82106	0.637205	0.903664	0.944859	1.30209	0.179889	0.153963	0.139691	0.137457	0.173766	0.160062	0.0391796	0.0391796	0.0391796	0.0391796	0.0391796	0.0391796	11.7315	11.7312	11.7277	11.71	11.4154	10.9521	10.5758	9.83494	8.56382	7.62486	7.4348	0.0972708	0.0972006	0.0966905	0.0948709	0.0839223	0.080652	0.0801104	0.0789462	0.0664816	0.0620206	0.061446	8.26346	8.25638
100465	Mob3c	2.117	2.48362	2.47809	2.26513	2.45932	2.11598	4.19987	5.8895	7.49347	8.41959	6.33635	5.27423	0.462324	0.682396	0.94188	0.937895	0.797722	0.695909	1.64477	2.29614	2.86794	2.58225	2.84915	2.3692	1.92452	1.86375	1.91863	2.19562	2.72649	2.85793	2.90342	2.78505	2.29884	2.29879	2.2988	0.342781	0.42117	0.527252	0.645056	0.665131	0.659321	0.626643	0.518982	0.447124	0.447121	0.447121	5.67166	5.69341
100494	Zfand2a	0.896926	1.15384	1.06	0.956749	1.15474	0.99357	5.40376	6.10904	6.63526	7.64487	6.51305	6.3544	0.745169	0.719671	0.73716	0.728703	0.543466	0.551721	1.13507	0.890424	0.901876	0.97605	0.882863	0.904753	12.8071	12.8071	12.8071	12.8074	13.0152	12.4824	11.4913	10.4466	10.3716	10.3763	10.4446	0.58339	0.58339	0.583404	0.583774	0.655534	0.55357	0.542432	0.541887	0.541886	0.541886	0.541886	15.1088	15.1088
100502698	Rubcn	2.17972	1.81733	1.73902	1.83705	2.17218	1.90162	4.35988	4.13487	3.60425	3.73549	3.59792	3.33641	0.544696	0.454691	0.456496	0.424908	0.443462	0.44754	0.662071	0.536102	0.517522	0.360417	0.457024	0.601453	7.21963	7.1991	7.1267	7.01386	6.56857	6.13249	5.78571	5.17222	5.22592	5.57477	5.97766	0.237263	0.227841	0.216595	0.206823	0.187194	0.177118	0.171781	0.166608	0.173933	0.186206	0.199601	7.69342	7.31814
100502841	Epg5	1.56773	1.62583	1.4298	1.20478	1.41451	1.20086	4.56923	5.03315	4.92151	5.85212	3.20673	4.3726	0.223882	0.245902	0.258913	0.22961	0.240535	0.222983	0.279414	0.403683	0.338153	0.316899	0.394	0.381529	3.99056	3.99056	3.99056	3.99056	3.98834	3.83376	3.73638	3.42694	3.27457	3.27449	3.27449	0.181019	0.181019	0.181019	0.181019	0.179828	0.166681	0.166652	0.148954	0.148537	0.148537	0.148537	7.49815	7.49815
100503659	Cbarp	1.41734	1.01538	1.2353	1.41473	1.00021	1.15302	3.26838	2.64326	2.59064	2.67558	1.58131	1.5844	1.72156	1.71761	2.21491	1.97146	1.77209	1.61879	1.64873	1.76197	2.04921	1.5078	1.81516	1.766	0.968862	0.97017	1.01343	1.10372	1.01302	0.959425	0.948622	0.946039	0.946035	0.946035	0.946035	0.259729	0.263307	0.316707	0.321176	0.254833	0.253633	0.253611	0.25361	0.25361	0.25361	0.25361	3.19625	3.33654
100504663	Atg14	0.668811	0.540934	0.63201	0.59878	0.487308	0.496578	3.06122	1.7109	2.05175	1.29779	2.11208	1.81934	0.257669	0.233209	0.187991	0.175564	0.189088	0.171728	0.487244	0.392187	0.51522	0.370328	0.537867	0.19287	1.81155	1.81137	1.809	1.79727	1.76197	1.71683	1.73451	1.77559	1.77731	1.78276	2.28569	0.179992	0.179992	0.179992	0.179991	0.176083	0.167284	0.166739	0.166735	0.166735	0.167615	0.192489	4.41903	4.41903
100532	Rell1	2.18306	1.41096	1.58844	1.5248	1.60224	1.76685	4.58145	3.15149	3.52255	2.6628	2.55187	2.92966	0.17687	0.165681	0.160765	0.135204	0.116574	0.140087	0.397728	0.477465	0.471722	0.305183	0.20763	0.263024	3.48774	3.48774	3.48773	3.4784	3.20109	3.01074	2.76129	2.54298	2.53186	2.53183	2.53183	0.0985021	0.0985021	0.0984975	0.0926408	0.08286	0.0738733	0.0715071	0.071505	0.071505	0.071505	0.071505	5.274	5.274
100604	Lrrc8c	1.6883	1.49486	1.47305	2.05627	1.56216	1.91802	3.62677	3.0388	3.9406	3.06063	1.55106	2.96432	0.434994	0.584671	0.593085	0.529138	0.323376	0.400722	0.416964	0.779378	0.600983	0.43439	0.392405	0.470219	13.6962	13.6962	13.6962	13.6962	13.6958	13.6412	13.2471	12.6103	11.3315	8.98127	8.93289	0.454165	0.454165	0.454165	0.454165	0.454037	0.443557	0.419565	0.416961	0.347816	0.296587	0.296198	20.4094	20.4094
100608	Noc4l	3.46415	4.53112	4.90598	5.41927	4.84299	4.80989	4.52179	6.14564	6.54531	6.19895	6.9327	6.68643	0.58355	0.681525	0.855996	1.00532	1.36439	0.684696	0.678448	1.36673	1.2874	1.33321	1.43042	1.50197	25.1447	24.9917	25.1514	25.1914	26.8257	28.3119	29.3231	31.2342	35.2496	35.4975	35.4535	0.866764	1.03466	1.18112	1.19681	1.19772	1.19773	1.19772	1.25585	1.27222	1.01576	0.923607	21.7359	21.9404
100609	Nsun5	3.08361	2.94089	3.08396	3.6039	3.32225	2.89278	5.98255	7.23339	7.95076	7.99907	7.33954	6.138	1.83444	2.0382	2.21811	2.33852	2.79258	2.59033	2.46758	2.83033	3.47658	3.30255	3.75094	3.8527	13.0155	12.9409	12.5815	11.5347	13.0117	14.4435	15.3507	17.374	20.7441	20.8689	20.8721	1.22714	1.30271	1.40361	1.54514	1.6038	1.60439	1.60464	1.71809	1.73213	1.73227	1.73227	12.8764	12.969
100678	Psph	10.3862	8.4528	8.4344	9.57606	8.52673	8.82321	12.3179	11.3224	11.8211	12.7441	12.7886	11.5336	0.785806	0.898748	0.842843	0.808409	0.977764	1.04935	0.905206	1.14079	0.784627	0.517306	0.784391	0.929198	21.3659	21.3659	21.3659	21.3659	21.3659	21.3659	21.3659	21.5732	26.7706	27.1717	28.4292	0.223088	0.223088	0.223088	0.223088	0.223088	0.223088	0.223088	0.238147	0.283909	0.284078	0.314617	15.2803	15.2803
100756	Usp30	1.00141	0.492135	0.821091	0.853078	0.929431	0.870952	0.784764	1.20365	0.674216	1.20419	1.08883	1.24979	0.339734	0.300961	0.344293	0.276409	0.458108	0.392779	0.776228	0.685135	0.659092	0.4991	1.17443	0.909891	8.80831	8.81191	8.84577	8.88165	8.96269	9.01473	9.04817	9.32675	10.8092	10.8642	10.8658	0.290055	0.294281	0.299784	0.299926	0.299928	0.299928	0.299931	0.330418	0.357808	0.35781	0.35781	7.80301	7.99904
100763	Ube3c	4.44355	5.70139	6.21623	6.52495	5.97953	5.58825	4.36445	6.24823	6.74246	5.93419	4.5891	6.07068	0.5565	0.571646	0.620322	0.71723	0.840459	0.868474	0.695095	0.572232	0.82329	0.80966	1.03899	1.1008	20.4359	20.4332	20.358	20.4618	21.7617	22.4721	22.84	23.2962	26.4755	26.462	26.4616	0.772947	0.775698	0.86044	0.940227	0.988098	0.988098	0.988098	1.00854	1.00155	0.985678	0.985665	26.9039	26.9039
100764	Rita1	7.97333	8.07703	8.17477	8.60873	7.51813	7.97523	2.84801	5.02384	5.60607	5.59977	4.47983	5.29084	0.314922	0.484713	0.359358	0.541663	0.496194	0.669509	0.431229	0.44393	0.708522	0.527994	0.768261	0.598104	4.52655	4.52791	4.76624	5.32666	6.92854	8.1178	9.05699	13.1572	14.6011	14.7276	14.7382	0.269511	0.277101	0.559642	0.656393	0.676913	0.677386	0.734976	0.688236	0.554094	0.555453	0.555457	2.8202	3.30698
100910	Chpf2	1.76011	1.36508	1.60081	1.85741	1.42897	1.73988	8.93359	8.7983	8.25672	7.4766	7.95713	6.97808	4.61538	2.76336	2.77003	2.39587	3.29582	2.96212	3.16421	1.99342	1.78981	1.71148	2.25446	2.03884	10.4949	10.4856	10.3961	10.1722	8.94656	8.2661	7.94582	7.17499	6.87012	6.866	6.86576	3.73546	3.68372	3.46381	3.20809	3.22751	3.34166	3.28305	2.6099	2.58182	2.58128	2.58122	14.9272	13.9203
100929	Tyw1	5.7643	6.92826	6.58885	6.79238	6.58896	6.65016	3.97435	3.12624	2.43968	3.81099	2.87129	3.727	0.419755	0.457877	0.532506	0.583421	0.738826	0.720201	0.548376	0.533953	0.485203	0.502262	1.03321	0.914646	7.2631	7.26329	7.30208	7.55798	8.33801	8.7816	9.18981	11.3334	11.6064	11.6087	11.6088	0.134117	0.134256	0.151452	0.201704	0.212207	0.212855	0.225587	0.227332	0.227328	0.227328	0.227328	8.61647	8.62965
100952	Emilin1	6.43145	5.21728	5.35036	5.9512	4.84023	5.58705	6.43082	3.66786	3.19876	3.71763	4.64553	5.26583	1.84818	1.10717	0.856648	0.746759	1.46863	1.04863	2.27749	1.65318	1.21196	1.00012	1.79614	1.67496	30.7647	30.7647	30.7647	30.7647	30.7005	28.7977	27.3496	24.8002	18.2636	18.131	18.1286	1.9828	1.9828	1.9828	1.9828	1.89498	1.6203	1.61986	1.38485	1.16839	1.16839	1.16839	30.9491	30.9491
101122	Rpusd3	0.956374	0.574584	0.647032	0.899743	0.692852	0.787078	4.73979	5.20357	5.08897	5.75282	4.95199	6.95687	1.82304	1.89543	2.83399	2.58148	1.56438	1.7056	1.22037	0.935897	1.14681	1.09739	1.00752	0.926139	2.04132	2.04121	2.03839	2.02055	1.89514	1.80791	1.76628	1.99886	2.44253	2.45006	2.45023	0.415757	0.415366	0.408834	0.386958	0.353226	0.351305	0.352661	0.447386	0.498636	0.499025	0.499042	2.97655	2.96501
101148	B630005N14Rik	1.32229	0.974788	0.994139	0.982848	0.97186	0.917927	3.03676	1.7748	3.19369	2.71207	2.27186	2.52609	0.540052	0.369809	0.30103	0.352653	0.309809	0.383231	1.0023	0.822208	0.884427	0.995747	0.818052	0.619968	9.56813	9.5041	9.60594	9.78541	9.058	8.49681	8.16225	7.81737	8.04685	8.59436	9.34567	0.462855	0.432906	0.39667	0.370808	0.338466	0.329832	0.326915	0.326615	0.33961	0.364409	0.396871	15.7737	14.5199
101185	Pot1a	0.637982	0.761597	0.73145	0.617691	0.564506	0.501964	4.78189	4.01998	4.1929	4.82147	3.55534	3.93172	0.19384	0.128498	0.101349	0.0989811	0.111241	0.117159	0.324021	0.237441	0.417485	0.144173	0.149515	0.315021	3.02593	3.02557	3.0046	2.88833	2.52512	2.34463	2.25801	2.18236	2.18901	2.6112	3.08419	0.161991	0.161557	0.147302	0.122073	0.116621	0.116604	0.116603	0.116605	0.117711	0.147154	0.166411	4.44485	4.42054
101197	Zfp956	0.769569	0.739227	0.812918	0.640846	0.688551	0.617759	3.0874	2.81085	2.24824	2.76238	3.29271	2.89562	0.223958	0.162676	0.0951762	0.0741901	0.159803	0.22574	0.428782	0.431158	0.121994	0.198918	0.226305	0.226007	1.81253	1.81252	1.8088	1.74964	1.46438	1.33829	1.4452	1.71808	1.72963	1.72965	1.72965	0.278933	0.278883	0.269116	0.214113	0.186915	0.200284	0.256696	0.266176	0.266177	0.266177	0.266177	2.97743	2.975
101206	Tada3	3.04636	2.67401	2.67672	2.19184	2.36921	2.32117	7.1767	7.43104	6.59692	7.48746	5.25439	5.85962	0.390772	0.470663	0.3794	0.346703	0.344284	0.3073	0.855488	0.586106	0.566037	0.531482	0.470515	0.308517	5.22605	5.20753	5.12223	4.96636	4.36316	3.92545	3.68974	3.48502	3.57575	3.82837	4.20155	0.340238	0.329215	0.307982	0.285504	0.245803	0.233304	0.228976	0.226594	0.234319	0.252025	0.277062	9.88314	9.45632
101240	Wdr91	1.22098	0.869892	0.841672	1.15017	1.22519	1.15008	3.3792	3.58721	3.85401	3.40076	3.03708	3.91234	0.286615	0.271463	0.268647	0.204404	0.358491	0.301564	2.59828	2.98181	2.71304	2.7728	2.71005	2.57463	3.62448	3.60304	3.55985	3.63749	3.93833	3.95456	4.04642	4.5057	4.65639	4.66351	4.6645	0.358797	0.342067	0.337002	0.336387	0.34008	0.35114	0.367043	0.40021	0.405708	0.406061	0.406123	5.91636	5.5763
101314	Brk1	1.92966	1.73807	1.55627	1.89983	1.78166	1.70224	9.06561	6.20545	7.05993	6.57528	5.73838	6.09547	1.11152	1.03794	0.979429	0.991327	0.947998	1.01351	1.75019	2.08619	1.93724	1.66774	2.16519	1.94781	67.5816	67.5816	67.5816	67.5838	67.6764	66.8217	62.1094	65.4012	66.6532	66.7315	66.7364	1.29856	1.29856	1.29853	1.29623	1.1796	1.12328	1.17941	1.3422	1.3422	1.3422	1.3422	46.8319	46.8319
101476	Plekha1	5.51866	4.12895	3.79893	3.7184	3.59006	3.38978	7.02614	7.51245	6.54083	6.01804	6.63539	6.21509	0.568799	0.62924	0.508899	0.478778	0.463738	0.46665	1.22711	1.21744	1.13625	0.948107	1.0835	1.03545	9.2155	9.18976	9.13617	9.0824	8.92166	8.70847	8.42898	7.39818	6.87744	6.80805	6.79032	0.685962	0.672296	0.666618	0.663267	0.649582	0.627885	0.602879	0.537049	0.510461	0.506454	0.505341	16.864	16.4721
101513	Mob2	1.16483	1.24121	1.15574	1.5502	1.00982	1.41378	4.56981	6.17396	3.17997	4.24697	4.88176	4.58352	0.361535	0.445247	0.541736	0.55866	0.637311	0.58042	0.515188	0.413318	0.771561	0.570875	0.950815	0.776909	4.74318	4.73163	4.60543	4.56682	5.17324	5.4471	5.5686	5.66991	5.67499	5.67501	5.67501	0.381209	0.383867	0.470919	0.591389	0.56	0.548009	0.547692	0.54767	0.54767	0.54767	0.54767	7.20891	6.97009
101565	Ccp110	1.11531	1.26112	1.05305	1.18788	1.17849	0.883724	2.73743	2.57771	2.19097	2.31928	1.98748	3.04175	0.182335	0.215962	0.173398	0.237038	0.229799	0.270562	0.967981	0.994254	0.782344	0.745675	0.665808	0.708874	5.62674	5.61129	5.55259	5.45636	5.0734	4.74407	4.55089	4.67681	5.82472	6.64329	7.11556	0.32873	0.320593	0.30874	0.296938	0.271138	0.259879	0.257528	0.281303	0.348847	0.393183	0.418625	10.0049	9.69035
101568	Vrk3	1.2528	0.957132	0.912279	1.15991	0.869792	0.596575	3.38039	3.07983	2.56156	2.41985	2.47503	2.6772	0.332977	0.272983	0.250305	0.274695	0.284024	0.278417	0.472264	0.252624	0.403507	0.342565	0.386945	0.330824	4.76582	4.76559	4.75605	4.67936	4.241	3.9636	3.80743	3.62527	3.60756	3.66001	4.13858	0.211254	0.211009	0.204258	0.178264	0.160531	0.160945	0.161971	0.171481	0.195994	0.191414	0.197586	5.51998	5.50694
101592	Efl1	1.33559	1.76752	1.92701	2.1863	1.90722	1.87755	2.23721	2.95731	3.74117	3.18872	2.76617	3.12952	0.317696	0.378722	0.395432	0.443303	0.502196	0.531166	0.191197	0.360686	0.259139	0.225346	0.719679	0.556953	3.63314	3.63014	3.58947	3.73217	4.13266	4.15263	4.26139	5.17914	5.69642	5.70152	5.70307	0.264825	0.264951	0.30231	0.384945	0.403385	0.403386	0.403387	0.41154	0.40821	0.392519	0.392519	9.27994	9.28064
101631	Pwwp2b	2.42973	2.10016	2.24155	2.63966	2.17704	2.17034	1.22373	1.67758	1.96904	1.33068	1.51868	1.88378	0.21768	0.263982	0.253834	0.195659	0.334786	0.221763	0.568503	0.528893	0.563378	0.346521	0.566769	0.618166	1.4206	1.4206	1.4205	1.4047	1.41413	1.6717	1.80838	1.6038	1.39472	1.39417	1.39417	0.192386	0.192386	0.192386	0.192386	0.202823	0.219689	0.219752	0.159454	0.158543	0.158543	0.158543	2.51447	2.51447
101685	Spty2d1	1.66063	1.37095	1.12538	1.32263	1.26359	1.44258	6.73269	7.49326	8.69302	9.09816	6.80416	8.33771	0.408286	0.406218	0.460288	0.465214	0.46727	0.297988	0.547745	0.604044	0.70721	0.501502	0.524675	0.280487	3.96708	3.96708	3.96708	3.96708	3.96707	3.88272	3.58333	3.34112	3.15197	3.04478	3.04459	0.219791	0.219791	0.219791	0.219791	0.219787	0.190947	0.184556	0.184555	0.169469	0.168681	0.168681	6.39721	6.39721
101739	Psip1	1.09863	1.56456	1.32498	1.34034	1.45861	1.80119	2.49779	2.49949	2.05045	3.19501	1.92601	3.14354	1.61148	1.60935	1.51313	1.40294	1.38288	1.62298	2.06208	1.81758	1.61137	1.6771	1.78395	1.82736	48.7453	48.7453	48.7453	48.7453	48.7453	48.7453	48.7453	48.768	52.314	56.0572	58.2662	0.995117	0.995117	0.995117	0.995117	0.995117	0.995117	0.995117	0.966522	0.946824	1.00766	1.07843	55.1094	55.1094
101831	Faap24	2.32847	2.08916	2.24783	2.45456	2.355	2.42953	2.77226	2.85368	2.05228	3.18593	2.7156	3.6114	0.377626	0.414489	0.381675	0.508627	0.477351	0.67679	0.27795	0.341061	0.236119	0.217703	0.42926	0.583972	4.901	4.901	4.90108	4.90156	4.92202	5.06436	5.38295	6.44971	8.82098	10.5162	10.8178	0.137724	0.137728	0.137767	0.137936	0.1423	0.159544	0.176859	0.193891	0.273675	0.301486	0.304889	3.89542	3.89562
101835	AW146154	0.984169	0.803897	0.940934	0.892833	0.877139	0.895278	2.75664	2.90818	1.63772	1.83414	2.22872	2.41241	0.11767	0.118992	0.0923903	0.0947991	0.120375	0.12061	0.0963283	0.120919	0.12506	0.0391796	0.140272	0.16598	1.34109	1.34175	1.38308	1.48581	1.52645	1.53975	1.5473	1.55623	1.67051	2.26075	2.27409	0.117693	0.116733	0.100326	0.0984147	0.0983101	0.0983101	0.09831	0.0983102	0.117892	0.14356	0.143572	2.10066	2.0342
101861	Ints4	1.92423	2.5167	2.3272	2.11544	2.14733	2.02995	4.97979	4.06292	4.46954	4.63899	4.27638	4.63324	0.223001	0.180477	0.174681	0.207107	0.25694	0.23016	0.346476	0.298016	0.355415	0.296013	0.554248	0.346327	10.7468	10.7468	10.7468	10.7468	10.7468	10.7468	10.747	10.9607	12.2237	12.4098	13.6771	0.204477	0.204477	0.204477	0.204477	0.204477	0.204478	0.204497	0.21705	0.233576	0.238468	0.268287	10.4341	10.4341
101966	D8Ertd738e	2.02872	1.19295	1.70408	1.43227	1.80112	1.61627	9.56593	10.0923	10.9778	12.66	13.7567	15.387	0.705584	1.03422	0.941958	1.61848	1.30292	1.26521	1.50453	1.49233	1.66159	1.69791	1.76977	1.6667	73.9168	73.9121	73.8288	73.7791	73.7539	70.5239	68.0745	64.5107	63.8122	56.0366	53.9447	0.902476	0.90733	0.996162	1.06455	1.04462	0.926693	0.926686	0.926754	0.973933	0.944386	0.952181	67.2337	67.2337
101985	Usb1	1.86185	1.74549	1.70655	2.05664	2.05657	1.99966	6.70145	5.27845	5.73709	5.7858	5.87234	6.47347	0.391884	0.308398	0.303148	0.281982	0.403779	0.311403	0.918713	0.630395	0.694947	0.504604	0.925227	1.01965	9.89297	9.86215	9.74656	9.58615	8.99267	9.19439	9.37955	10.4623	12.8811	13.7011	13.9116	0.35802	0.337616	0.315344	0.304078	0.296597	0.298823	0.3049	0.351763	0.412384	0.425727	0.429317	8.41899	7.77697
102075	Plekhg4	1.31924	0.959512	0.870413	1.08327	1.00831	0.902593	0.40812	0.672014	0.525638	0.0802378	0.869561	0.211118	0.515982	0.369774	0.278294	0.318502	0.395971	0.238197	0.307721	0.361685	0.41155	0.431689	0.356699	0.290128	1.92826	1.92826	1.92825	1.92825	1.90815	1.80022	1.74967	1.72128	1.59374	1.26108	1.25872	0.334758	0.334758	0.334758	0.334752	0.315705	0.298939	0.298741	0.298737	0.261533	0.218641	0.218521	3.91601	3.91601
102093	Phkb	1.93461	1.89749	1.61685	1.90027	1.8239	1.59104	6.54748	5.87973	5.13508	5.6786	5.3073	5.68358	0.100557	0.0772152	0.0726435	0.0846045	0.0932852	0.0907658	0.334611	0.163926	0.187859	0.158875	0.250251	0.12455	4.72536	4.72536	4.72536	4.72536	4.68777	4.35696	4.15806	3.92159	3.89382	3.89354	4.11944	0.141286	0.141286	0.141286	0.141286	0.124848	0.116415	0.116414	0.116414	0.116414	0.116417	0.133602	5.29867	5.29867
102103	Mtus1	1.64117	1.58331	1.63148	1.56323	1.4056	1.7099	2.27031	1.44471	1.40845	0.943981	1.72876	1.82156	0.216039	0.1466	0.145667	0.113814	0.214214	0.181834	0.513341	0.459418	0.639173	0.48432	0.627555	0.516618	1.52327	1.51987	1.49959	1.45902	1.3423	1.29414	1.27888	1.28382	1.50621	1.99845	2.29983	0.0607734	0.0597517	0.0568449	0.0538944	0.051122	0.0508164	0.0507842	0.0514365	0.0617555	0.0814442	0.0924605	3.90276	3.82495
102115	Dohh	3.29931	2.71503	2.94292	3.26955	3.28115	3.22476	7.28881	9.4313	8.50658	8.98898	8.50995	9.03094	1.49589	1.71563	1.76905	1.72696	1.93638	1.75133	3.78923	3.70931	3.43287	3.38303	4.66528	4.12491	30.0113	30.0113	30.0113	30.0113	30.0112	29.7859	28.3984	30.5004	31.5802	31.6896	31.7007	1.38619	1.38619	1.38619	1.38619	1.38603	1.20415	1.23974	1.46428	1.46428	1.46428	1.46428	17.1822	17.1822
102124	Enkd1	1.73958	1.72616	1.8568	2.67138	2.08047	2.38032	2.25805	3.35984	3.00645	2.34515	4.55609	4.61343	0.770621	0.617821	0.488074	0.501695	0.92242	0.939261	2.94783	2.55767	2.47786	2.37836	2.2347	3.17419	8.63145	8.52776	7.491	6.92949	7.7726	8.40328	8.87133	10.7252	10.9849	10.9893	12.0019	0.386645	0.386645	0.386645	0.386645	0.386645	0.38675	0.4226	0.457138	0.457138	0.457241	0.546693	9.96232	9.96232
102323	Dcun1d2	3.09963	2.96654	2.70307	3.05119	3.16239	2.77622	9.0864	11.3828	10.5071	9.79898	9.72875	9.91801	0.263845	0.330107	0.357265	0.340366	0.373634	0.492452	0.680351	0.729039	0.586033	0.448467	0.981226	0.966562	5.87505	5.87505	5.87505	5.87505	5.92003	6.28991	6.56862	7.6964	7.89074	7.89399	7.89406	0.48249	0.48249	0.48249	0.482491	0.528398	0.569222	0.587097	0.648302	0.648302	0.648302	0.648302	6.00395	6.00395
102423	Hinfp	2.17537	2.18572	1.89604	1.73771	1.99695	1.62832	7.7919	8.64786	8.60529	10.0918	6.47983	6.67583	0.640463	0.735511	0.694234	0.680301	0.547313	0.581111	0.883729	0.751487	0.643727	0.585515	0.656359	0.654835	7.95385	7.95385	7.95384	7.95363	7.81816	7.17639	6.81578	6.57244	6.56598	6.59257	7.13671	0.834398	0.834398	0.834389	0.83415	0.762469	0.69127	0.688889	0.688781	0.688822	0.693114	0.765504	14.4145	14.4145
102442	Dennd4a	2.19145	2.15659	2.47988	2.50158	2.54901	2.37957	3.83346	5.3672	6.17608	5.82306	5.15204	5.37788	0.244008	0.277836	0.34057	0.387207	0.413699	0.470294	0.233173	0.262051	0.289967	0.322296	0.523784	0.579933	1.83227	1.83054	1.78608	1.80331	2.28858	2.63764	3.01396	3.37417	3.38392	3.38403	3.38404	0.154063	0.154324	0.196135	0.255289	0.315393	0.302113	0.29589	0.29531	0.295309	0.295309	0.295309	6.66143	6.66536
102566	Ano10	3.68584	2.74578	3.3342	2.98416	3.1125	2.43168	4.62302	5.71922	7.15456	7.54307	5.19487	5.43876	0.233229	0.19273	0.1919	0.165549	0.213128	0.1788	0.55287	0.469605	0.516425	0.369899	0.752656	0.353877	13.4665	13.4175	13.3049	13.1758	12.8183	12.5437	12.3351	11.7933	11.0893	10.7315	10.573	0.153359	0.145168	0.141146	0.139308	0.137277	0.136308	0.135415	0.131266	0.124505	0.121418	0.120046	11.1302	10.4997
102595	Plekho2	1.47456	1.55545	1.18384	1.30858	1.34999	1.33136	8.29027	5.83941	6.56969	6.76499	5.71932	5.38001	0.680257	0.681581	0.734563	0.751214	0.502179	0.45736	2.95198	2.91138	2.90904	2.8412	2.33991	1.90205	10.463	10.4499	10.3963	10.3015	9.88326	9.44905	9.06645	7.71758	5.43286	4.36192	3.9238	0.348049	0.342599	0.33391	0.324909	0.304975	0.292789	0.282619	0.238957	0.170006	0.140792	0.128659	13.2135	12.9599
102632	Acad11	1.83744	1.68362	1.7549	1.70895	1.74316	1.69634	1.47054	0.982805	0.99992	0.488603	0.639522	1.03574	0.071678	0.0609275	0.0430383	0.0132597	0.0375952	0.042075	0.138495	0.0747064	0.0880983	0.0569117	0.0431338	0.115451	2.44773	2.44704	2.43947	2.41171	2.25333	2.11722	2.02086	1.85313	1.81952	1.95716	2.40421	0.00954257	0.00946822	0.00901335	0.00813466	0.00711359	0.00704024	0.00703125	0.00703096	0.00714015	0.00800292	0.010116	1.80218	1.78698
102644	Oaf	4.54864	3.50609	3.95602	3.9205	3.75083	3.98246	3.97845	3.98341	3.41037	4.04588	3.08963	4.20614	0.814952	0.901577	0.781727	0.773359	0.679982	0.53709	0.965257	1.24025	1.06637	0.905776	0.926038	0.808349	27.4265	27.4265	27.4265	27.4265	27.4264	27.4228	27.3734	26.3299	20.8585	14.4498	13.7398	0.787173	0.787173	0.787173	0.787173	0.78714	0.786106	0.776039	0.739537	0.475593	0.394632	0.392727	18.8276	18.8276
102657	Cd276	3.93222	3.04279	3.30796	2.93986	3.23253	3.03479	6.45818	7.37347	6.55013	6.57675	6.08705	6.35162	0.714442	0.723282	0.722272	0.707178	0.722149	0.641883	1.03828	0.797181	0.822776	0.806244	0.746531	0.863683	12.9823	12.9823	12.9823	12.9823	12.982	12.897	12.4919	11.939	10.8544	9.20526	9.17856	0.439607	0.439607	0.439607	0.439607	0.439473	0.420262	0.403038	0.402553	0.338403	0.310853	0.310797	16.0947	16.0947
102747	Lrrc49	0.829003	0.584078	0.72184	0.627914	0.725667	0.559485	2.80253	2.03203	2.37685	2.82458	2.11347	1.79437	0.104784	0.0808354	0.089016	0.0903628	0.0550635	0.0525676	0.0391796	0.0391796	0.0391796	0.0391796	0.0391796	0.0391796	2.93972	2.93884	2.93189	2.90939	2.71577	2.48532	2.3251	2.12221	2.15302	2.3712	2.69996	0.101117	0.100631	0.0986014	0.0942495	0.0790978	0.0740165	0.0727535	0.0722863	0.074929	0.0837773	0.0951295	3.49601	3.47278
102791	Tcta	2.72081	3.4612	3.39046	3.78388	2.94384	3.41306	11.2857	9.32172	8.84377	9.27156	8.58239	9.67335	0.728968	0.785959	0.401903	0.985427	0.670688	0.273825	1.29848	0.687111	0.551215	0.422351	0.592622	0.738393	3.53518	3.53518	3.53365	3.4753	3.08933	2.81275	2.66468	2.23874	2.0142	2.01327	2.01327	1.12456	1.12456	1.10931	0.964816	0.818402	0.801709	0.799805	0.646539	0.640434	0.640433	0.640434	4.88518	4.88505
102857	Slc6a8	0.982045	1.40896	1.46456	1.87808	1.47352	1.85324	3.55667	2.55743	2.7162	3.67915	3.73238	3.96424	1.29595	1.45787	1.54795	1.44988	1.89163	1.6803	0.968208	1.2989	1.69137	1.76669	1.95953	1.90576	11.3455	11.2494	11.1879	11.4489	13.2305	14.5647	15.4352	18.5867	20.811	20.8666	20.8685	0.692261	0.798104	0.983918	1.13232	1.34532	1.35984	1.29568	1.20342	1.25649	1.25719	1.25724	13.6428	13.7792
102866	Pls3	0.767087	0.656502	0.807697	0.702829	0.648168	0.678611	5.61458	4.88439	5.04122	6.31883	4.9895	4.06182	0.331279	0.41518	0.408024	0.42037	0.202826	0.245503	0.565884	0.645526	0.559096	0.549753	0.22209	0.423969	52.205	51.9539	51.4614	50.9156	49.3463	47.9866	46.7865	42.722	36.898	33.8473	32.3016	0.290155	0.271582	0.264467	0.260789	0.254583	0.249637	0.24467	0.225032	0.197942	0.184576	0.177661	43.1186	40.2947
102920	Cenpi	0.978283	1.15157	0.82242	0.83573	0.846879	1.00818	4.60609	4.13201	3.48344	4.59145	4.08829	4.42054	0.388364	0.343595	0.303413	0.327669	0.282385	0.395979	0.58559	0.3785	0.472655	0.682111	0.38398	0.440234	16.8674	16.8119	16.6203	16.3387	15.3791	14.6091	14.0961	13.4703	13.9403	14.8627	15.9521	0.673294	0.646223	0.615566	0.592165	0.555497	0.541988	0.536571	0.536752	0.562758	0.60164	0.645869	20.7713	19.7367
103080	Sept10	4.12443	3.28129	3.51725	3.20594	3.55269	3.10069	11.9834	11.7623	12.9383	13.456	8.91825	8.75827	0.326417	0.303363	0.29752	0.298528	0.250141	0.286094	0.366344	0.243458	0.325729	0.39695	0.356325	0.504189	20.4766	20.4756	20.4586	20.3698	19.5995	18.8385	18.2434	16.546	15.6568	15.5835	15.5778	0.339327	0.338706	0.33288	0.31476	0.281047	0.277883	0.27466	0.259431	0.258157	0.258139	0.258138	13.2037	13.1683
103136	Pwp1	4.95586	4.36549	4.62317	4.21276	4.47349	4.2987	4.29127	7.43108	7.15434	7.65396	5.69244	6.92761	0.647795	1.00129	1.02916	1.09765	0.978153	0.958763	1.81247	2.33802	2.50566	2.74268	2.69387	2.40332	44.6868	44.5997	44.7718	45.421	48.1698	50.3031	51.8027	56.4756	62.3268	62.9675	63.0203	0.845523	0.981797	1.15636	1.28182	1.27491	1.1845	1.13049	1.14403	1.17856	1.17682	1.17583	33.92	34.7097
103140	Gstt3	0.996801	0.687456	0.519057	0.689266	0.488449	0.359133	4.48004	2.33577	2.76534	2.83047	3.0025	3.48146	0.31253	0.0894645	0.0917252	0.034799	0.170189	0.109009	0.954411	0.664532	0.674526	0.650289	0.597592	0.606691	2.54849	2.54794	2.53686	2.50104	2.37498	2.27707	2.19799	1.76935	1.42608	1.3911	1.3877	0.0520271	0.0515359	0.0467237	0.0420071	0.0406587	0.0404971	0.039532	0.028989	0.0283256	0.0283223	0.0283222	1.48914	1.46471
103199	Fig4	2.17094	2.51076	2.3366	3.09558	2.83232	2.98976	1.79704	1.70897	3.47671	3.05208	3.10857	2.55101	0.138184	0.129678	0.164805	0.234877	0.360203	0.343389	0.147509	0.193063	0.147242	0.163868	0.610276	0.519851	12.1851	12.2218	12.3294	12.4532	13.1606	14.0888	15.0962	19.0907	25.0526	29.2618	32.4841	0.119659	0.125764	0.132462	0.180288	0.230572	0.249292	0.266039	0.257314	0.257604	0.29435	0.323127	9.44318	9.96212
103213	Traf3ip2	2.5317	2.51254	2.33842	2.63121	2.82177	2.42897	5.84643	6.355	6.06031	5.8345	5.02814	4.30234	0.589223	0.529144	0.556516	0.550331	0.484413	0.366256	0.386775	0.612638	0.49368	0.476466	0.389487	0.31183	2.72695	2.71213	2.71715	2.82495	2.82987	2.60894	2.35291	1.8107	1.77491	1.7715	1.77065	0.369767	0.359255	0.34976	0.339315	0.300281	0.270114	0.25373	0.236537	0.233339	0.232957	0.232857	8.03165	7.74019
103236	Csnk1g2	4.58881	3.51694	3.9045	3.75225	4.07637	3.71991	2.77228	3.81832	4.09087	3.86744	2.57361	2.72143	1.01616	1.00951	1.47246	1.18449	0.878855	0.778554	2.07273	1.96696	2.47568	2.00357	2.38456	2.17474	33.5715	33.5715	33.5715	33.5715	33.5669	32.8579	32.2262	31.1711	30.6937	27.6489	27.4722	0.880196	0.880196	0.880196	0.880196	0.875409	0.809751	0.809745	0.809745	0.7786	0.720059	0.720059	25.9051	25.9051
103266	Tmem263	2.25613	2.23732	2.5388	2.31174	2.16157	1.72929	4.58045	3.9112	4.06947	3.31636	2.7602	2.69505	1.30562	1.06105	0.831	0.743584	0.771215	0.779363	2.46288	1.98303	1.74776	1.2978	1.42616	1.40642	15.2979	15.222	14.9329	14.5307	13.3452	12.3114	11.346	9.04278	8.40003	8.35879	8.35143	0.742912	0.698242	0.644515	0.613667	0.568734	0.524805	0.483979	0.419538	0.406989	0.405802	0.405538	20.3377	18.7442
103268	Cep57l1	6.87438	5.67344	5.47925	5.68677	5.50714	4.94165	6.40719	6.46841	5.66082	6.26726	6.58399	6.73355	0.252712	0.214364	0.160212	0.13207	0.210783	0.270391	0.38939	0.241957	0.241978	0.312156	0.323996	0.31593	5.17491	5.16438	5.11091	5.0031	4.48357	4.05986	3.81353	3.77047	4.82357	5.45034	5.68647	0.2711	0.264221	0.249427	0.232129	0.2292	0.237023	0.234862	0.257057	0.28628	0.316371	0.327539	7.18575	6.93346
103284	Zc3h10	11.8516	9.736	9.04555	8.37029	8.45726	8.74383	24.4684	23.6502	19.2772	21.802	21.1133	21.3518	2.05526	2.44885	1.91177	2.23865	1.83698	1.82322	0.63223	0.554871	0.580783	0.517871	0.448412	0.561682	4.41494	4.41078	4.30474	3.33612	2.78606	2.88212	2.80245	2.93423	3.46628	3.61303	3.66177	1.25456	1.24203	1.20598	1.1521	0.967735	0.853551	0.818412	0.921974	1.05952	1.09548	1.1081	6.91744	6.69914
103468	Nup107	4.81805	4.82329	5.17026	5.34442	5.02601	5.14322	8.6056	10.5434	10.8219	10.9785	9.81119	11.5074	0.809312	0.889866	1.05024	1.11636	1.0521	1.19905	1.25451	1.13241	1.2744	1.5564	1.34261	1.53874	40.0749	40.075	40.1185	40.4397	41.345	41.8816	42.1983	44.0635	51.031	51.1691	51.1711	0.911084	0.91122	0.933954	0.968073	0.96972	0.96972	0.969733	1.08066	1.16335	1.16335	1.16335	42.2729	42.2849
103537	Mbtd1	7.42001	7.81986	7.99345	7.60011	7.49172	6.81862	5.39964	5.91775	6.79378	5.52815	7.51954	5.06262	0.665666	0.794016	0.85549	0.912175	0.783451	0.776794	3.88855	5.21574	4.51555	4.97719	5.02299	4.84941	3.6261	3.62614	3.65607	3.97988	4.40618	4.18045	3.83986	3.80004	3.80004	3.80004	3.80004	0.958601	0.958704	1.00762	1.15737	1.17236	1.04694	1.00517	1.00458	1.00458	1.00458	1.00458	19.7533	19.7601
103554	Psme4	1.46165	1.07432	1.24063	1.28285	1.23529	1.32158	3.10233	3.1424	3.1587	3.48427	2.5883	2.0016	0.496354	0.436844	0.381129	0.395222	0.327569	0.393177	0.43865	0.584116	0.51054	0.513939	0.325498	0.320159	17.6753	17.6738	17.6583	17.5918	16.8285	15.8886	15.242	14.3749	14.293	14.6044	15.7562	0.604333	0.603378	0.597453	0.580237	0.509499	0.491559	0.488402	0.487345	0.489515	0.504311	0.553166	18.7111	18.6669
103573	Xpo1	7.75103	7.79956	7.06123	8.17386	7.97595	7.58217	10.4926	11.0577	9.88002	11.4835	13.8356	12.1424	1.53589	1.57652	1.53754	1.70362	1.76328	2.05325	3.27191	3.02044	3.17618	2.96706	3.93313	4.60243	100.583	100.372	100.384	100.412	100.475	100.671	102.127	105.474	123.819	129.761	129.924	2.1493	2.37736	2.39848	2.39912	2.39939	2.43588	2.52372	2.47759	2.52227	2.52328	2.52304	92.9649	92.9649
103694	Tmed4	1.29898	0.886365	0.807662	0.926404	0.814413	0.716466	4.63252	3.68996	2.57499	3.53401	2.90552	3.77463	0.454821	0.268494	0.228907	0.0811391	0.28038	0.376527	3.13335	3.33071	2.89323	2.87572	3.20279	3.44643	33.2637	33.1723	32.9212	32.583	31.4321	30.3874	29.5558	28.0502	28.9448	30.8664	32.6097	0.274748	0.258559	0.246494	0.238751	0.228088	0.224781	0.224032	0.228609	0.245327	0.261541	0.274809	19.7548	18.5016
103724	Tbc1d10a	1.97516	1.61868	1.5758	1.85042	1.8506	1.30371	8.79868	9.46397	9.26255	6.87157	7.30258	6.58821	0.416023	0.488127	0.418488	0.426411	0.447123	0.479556	0.972094	1.0308	0.833845	0.556821	0.862632	1.2638	9.41618	9.41618	9.41618	9.41618	9.41617	9.3694	9.05543	8.48392	7.27687	7.24493	7.24421	0.352276	0.352276	0.352276	0.352276	0.352271	0.331391	0.317283	0.297593	0.271018	0.271018	0.271018	8.9123	8.9123
103733	Tubg1	2.94474	2.76822	3.33753	3.01722	2.98496	2.47048	9.92217	8.93888	9.02971	8.80285	9.96824	11.2197	0.230572	0.177956	0.162357	0.148827	0.16499	0.212244	0.389672	0.727402	0.651179	0.68692	0.437	0.584001	24.5452	24.4561	24.2171	23.893	22.8078	21.8717	21.1771	20.26	21.9043	23.9334	25.3669	0.0706065	0.0659717	0.0623745	0.0600094	0.0568941	0.0561092	0.0561094	0.0584875	0.0653087	0.0706666	0.0741654	16.938	15.8005
103737	Pex12	4.20189	4.34543	4.70118	4.93328	4.40004	4.34255	12	11.9898	12.6399	12.3928	12.8484	15.3566	2.44572	2.51122	2.10695	2.3695	2.77124	3.16389	3.71519	3.33993	2.79299	3.01767	3.42976	4.16713	3.04999	3.03367	3.03154	3.07628	3.34393	3.58816	3.73954	4.10144	4.15703	3.65523	3.30041	0.818582	0.787941	0.780296	0.779382	0.779283	0.779558	0.781014	0.855116	0.937826	0.939615	0.939729	11.9069	11.3546
103806	Maml1	3.91679	3.23016	2.8211	3.04955	2.68024	2.85478	11.3917	8.7588	8.02547	8.94337	9.7074	8.35669	0.776677	0.880795	0.850571	0.842449	0.809908	0.754137	1.65379	1.45594	1.57886	1.63761	1.51139	1.50507	6.20719	6.19151	6.12807	6.0238	5.62822	5.40874	5.65653	5.70771	5.6651	5.68241	5.71793	0.533218	0.521326	0.502842	0.485007	0.448643	0.431588	0.423223	0.41334	0.411608	0.413159	0.415899	11.7343	11.3685
103836	Zfp692	3.19713	3.08411	2.97756	3.25799	3.42125	3.12017	4.90679	4.93255	6.98522	5.73225	6.09054	8.27966	0.879562	0.951495	1.15248	1.1115	1.43948	1.61934	3.78489	3.27655	3.63479	3.99951	5.25671	5.90496	11.6077	11.6077	11.6077	11.6075	11.5851	11.4107	11.4587	15.2147	17.1741	15.8732	15.8659	1.49795	1.49795	1.49796	1.49814	1.52599	1.80044	1.95115	2.52062	2.51663	2.33512	2.33505	22.9024	22.9024
103841	Cuedc1	1.81387	1.43721	1.48704	1.1789	1.30541	1.46949	5.43864	5.11546	3.54246	3.84972	3.13076	3.19982	0.667268	0.597796	0.788764	0.809404	0.519058	0.415977	1.33652	1.71021	1.27185	1.45377	1.17967	1.29723	3.98424	3.98422	3.98317	3.96448	4.03609	4.02573	4.01568	4.01028	3.19775	2.28251	2.27878	0.204455	0.204455	0.204454	0.204444	0.182252	0.173566	0.173531	0.173528	0.121471	0.0986506	0.0986071	9.49849	9.49849
104009	Qsox1	2.18047	1.81803	1.71309	1.49403	1.64834	1.453	8.56432	7.36731	6.54318	6.91972	5.6579	6.94099	0.38753	0.494079	0.452404	0.38509	0.322127	0.256917	0.866894	0.759055	0.783643	0.624359	0.484564	0.622174	15.4684	15.4136	15.2545	14.9149	14.4797	14.4149	14.1196	12.4349	10.2763	9.33401	8.84474	0.608346	0.579288	0.55651	0.540301	0.505062	0.478187	0.456013	0.395766	0.339215	0.313694	0.299613	15.8452	14.9175
104015	Synj1	1.53575	1.86653	2.11118	1.98919	2.07562	2.27906	4.00167	4.8381	4.20292	4.6103	2.20774	3.73281	0.135359	0.14983	0.110804	0.102951	0.12206	0.105299	1.22353	1.48422	1.53621	1.72013	1.51895	1.60697	1.63002	1.62704	1.60691	1.55607	1.3224	1.18634	1.13607	1.11141	1.12953	1.2093	1.38857	0.153637	0.151592	0.144451	0.133106	0.110968	0.106269	0.105182	0.10476	0.106809	0.115059	0.132821	4.51452	4.42876
104082	Wdr7	1.02718	0.818679	0.765599	0.686499	0.76795	0.605142	1.87713	2.05058	1.8451	2.65227	2.38988	1.5929	0.0838579	0.0736878	0.0741594	0.0868754	0.0666681	0.0808777	0.154311	0.146238	0.223446	0.198271	0.170914	0.170471	3.5157	3.5157	3.51566	3.51515	3.43482	3.15865	2.98734	2.84705	2.84139	2.85938	3.1132	0.0648725	0.0648722	0.0648646	0.0647748	0.0580122	0.0527969	0.0524569	0.0524231	0.0524351	0.0529307	0.0592055	5.61897	5.61895
104111	Adcy3	0.53475	0.605114	0.514238	0.50613	0.607582	0.57038	1.0687	1.08527	1.513	0.962319	1.14982	1.47046	0.190803	0.179089	0.174987	0.14881	0.177373	0.20558	0.21086	0.392649	0.333483	0.234105	0.434942	0.426475	1.30744	1.30439	1.27431	1.28868	1.42484	1.49832	1.55454	2.09644	2.13977	2.13994	2.13995	0.0805474	0.0805474	0.0805398	0.0765158	0.0736849	0.0736931	0.0817355	0.100257	0.100257	0.100257	0.100257	2.36103	2.36103
104112	Acly	3.45028	3.40767	3.33016	3.87539	3.58226	3.75135	19.1089	19.4382	17.7034	23.1315	24.3436	23.6626	1.08908	1.32216	1.37415	1.41709	1.66918	1.70463	3.27233	3.0698	3.2739	3.70454	4.39792	4.18557	92.9757	92.9295	92.7842	92.6341	92.5926	92.7017	93.4729	110.621	116.317	113.307	108.081	1.20481	1.25273	1.41103	1.59248	1.77087	1.7782	1.91837	1.8178	1.63116	1.51899	1.49424	64.3019	64.3019
104156	Etv5	1.81444	1.72789	1.75917	1.70717	1.86024	1.36737	3.12914	5.5039	4.09702	5.70827	2.6772	3.19462	0.0706092	0.20583	0.170123	0.178738	0.0618676	0.0593367	0.23897	0.129161	0.151925	0.110166	0.0928639	0.0873997	2.95175	2.97134	3.02498	3.09025	3.25839	3.33696	3.33258	2.89444	1.95958	1.51864	1.31536	0.0803801	0.0872458	0.0920379	0.0943881	0.0952199	0.0926058	0.0887622	0.0714842	0.0491763	0.0395057	0.0349066	3.11392	3.4188
104184	Blmh	1.04055	1.30447	1.59462	1.54616	1.56909	1.93831	4.0533	4.81629	4.63927	4.04176	4.90307	4.89333	0.485989	0.439923	0.47866	0.529747	0.619595	0.586275	0.541031	0.65546	0.772114	0.631326	0.903465	0.910529	27.5983	27.6146	27.6622	27.7703	28.4005	29.0854	29.7182	32.1427	35.866	37.2628	37.7154	0.471769	0.476758	0.50852	0.546995	0.567837	0.579264	0.589008	0.574084	0.603354	0.618747	0.623971	24.0678	24.3659
104248	Cabin1	3.85032	4.56486	4.34114	4.38642	4.60214	3.9898	5.50639	7.7842	8.79851	8.3255	6.47972	6.53043	0.517134	0.5323	0.599456	0.592857	0.77795	0.609521	0.998658	1.22118	1.04286	0.964094	1.87344	1.31095	7.23668	7.08981	7.11824	7.57413	8.5048	8.8286	8.93945	8.99632	8.99711	8.99711	8.99711	0.479758	0.43715	0.531869	0.590651	0.596452	0.596466	0.596466	0.596466	0.596466	0.596466	0.596466	15.5195	14.2521
104252	Cdc42ep2	2.08373	1.70429	1.52326	1.25653	1.11019	1.20819	5.1491	4.06443	2.7974	2.19491	2.97995	4.1469	1.09158	0.838964	0.770212	0.505505	1.04101	1.25689	3.45712	2.7831	2.42549	2.42581	2.89126	2.913	3.96637	3.95983	3.82413	3.55959	3.05936	2.89477	2.84122	2.81586	2.10195	1.67449	1.66658	0.322323	0.322287	0.312892	0.285086	0.281735	0.281735	0.281732	0.208819	0.1957	0.195692	0.195692	7.23299	7.23062
104263	Kdm3a	9.04902	7.13863	7.16091	7.18779	6.4107	6.24593	8.87185	8.03474	8.24158	7.12533	6.69119	6.28743	0.764378	0.802901	0.643682	0.60793	0.603168	0.51599	1.6864	1.32227	1.50603	1.28523	1.23748	1.06951	11.4128	11.3315	11.0635	10.6783	9.34847	8.23556	7.46095	6.35067	6.62666	7.33647	8.01786	0.850856	0.805644	0.752616	0.706352	0.606386	0.547298	0.511917	0.468305	0.499827	0.553323	0.603413	23.9557	22.3497
104348	Zfp120	0.736903	0.710668	0.576328	0.724938	0.369433	0.803972	2.36557	2.37356	2.65577	2.24625	2.83054	2.94987	0.261996	0.18421	0.193175	0.214071	0.245625	0.202459	0.489879	0.355761	0.389021	0.274344	0.54665	0.305695	4.41054	4.37139	4.21057	4.02153	3.65274	3.63176	3.81704	4.2402	4.28878	4.28928	4.28931	0.250965	0.222901	0.192667	0.185199	0.192142	0.216835	0.234054	0.243712	0.244057	0.244065	0.244066	6.15608	5.2072
104349	Zfp119a	0.95399	1.12259	0.895495	1.10125	0.848502	0.904162	3.2023	3.35502	3.5818	2.86379	2.25371	2.17048	0.377984	0.340991	0.332425	0.331598	0.363965	0.320594	0.914853	0.948884	0.869162	0.824941	0.921361	0.872867	2.80981	2.79666	2.6785	2.56951	2.40699	2.35477	2.33799	2.33025	2.4399	2.48496	2.48544	0.072833	0.0683301	0.060662	0.060408	0.0603974	0.0603974	0.0603974	0.060404	0.063757	0.0644185	0.064425	6.3819	5.89692
104360	Isl2	0.848975	0.864162	0.7346	0.866458	0.822115	0.785531	4.76643	5.10126	3.84675	3.77836	4.56866	5.59516	0.385577	0.188667	0.179391	0.131496	0.2224	0.256963	0.485885	0.236297	0.28874	0.281205	0.337319	0.505677	1.00707	0.999414	0.855408	0.557992	0.456781	0.548514	0.63947	0.733518	0.736694	0.736696	0.736696	0.229331	0.229288	0.227622	0.213091	0.164988	0.183132	0.200125	0.2036	0.203604	0.203605	0.203605	1.46515	1.46371
104383	Rcor2	3.09181	2.5558	2.75386	3.14731	2.86172	3.07222	3.2789	2.18179	2.16724	2.18142	2.16085	2.10927	1.45838	1.73098	1.74026	1.6164	2.07725	1.98101	2.00486	2.49978	2.26647	1.81065	2.66837	2.61284	4.56227	4.56412	4.65267	5.01346	6.10149	6.7998	7.60132	10.2466	10.6838	10.6905	10.6906	0.209592	0.212222	0.274909	0.342776	0.354847	0.367973	0.438874	0.491036	0.491131	0.491131	0.491131	4.7687	4.90241
104401	Pcnx3	4.15435	3.32992	3.79474	3.55577	4.07769	3.58875	8.16721	6.27068	7.33052	6.65746	6.97555	8.7147	0.696663	0.688187	0.697116	0.609776	0.723494	0.731885	2.54186	2.54929	2.53465	1.92128	2.30503	2.27671	6.32218	6.32218	6.32218	6.32218	6.27361	5.5492	5.52221	5.83468	5.83658	5.84311	5.84312	0.437817	0.437817	0.437817	0.437817	0.403281	0.400651	0.462327	0.465101	0.501064	0.501689	0.501689	11.5682	11.5682
104418	Dgkz	0.676339	0.833558	0.79009	0.345733	0.683397	0.71678	0.146066	0.0821328	0.0802378	0.164723	0.0802378	0.126282	0.502534	0.570179	0.69001	0.657587	0.777241	0.699654	0.626105	0.654683	0.901671	0.921226	0.919981	0.995433	13.1908	13.1765	13.0839	13.2458	14.0765	14.6038	14.935	15.9888	19.1487	19.2321	19.2338	0.48182	0.496726	0.624102	0.734231	0.754655	0.754117	0.745558	0.771542	0.842626	0.84263	0.84263	12.8324	12.8356
104444	Rexo2	6.54785	6.87753	6.00473	5.76957	5.66438	5.57372	9.85228	12.7792	13.363	14.26	10.0107	10.2505	1.0661	1.31486	1.31395	1.11094	1.0717	0.974669	1.58714	1.88553	1.90269	1.91115	1.4659	1.57906	36.061	36.061	36.061	36.061	36.061	35.9499	34.8461	33.2347	32.2802	29.3451	29.2826	1.44158	1.44158	1.44158	1.44158	1.44158	1.37165	1.31832	1.31832	1.21489	1.17056	1.17056	35.761	35.761
104445	Cdc42ep1	4.94818	4.5621	4.66069	4.97861	4.67854	5.46648	16.1631	13.1267	14.968	16.38	13.8578	13.4314	5.7961	5.54637	5.86799	6.02935	5.72548	5.39627	7.45084	6.549	6.30664	6.00985	6.45909	6.91161	13.3521	13.3521	13.3521	13.3521	13.3518	13.3006	12.787	11.8117	10.2772	8.19735	8.17173	3.5343	3.5343	3.5343	3.5343	3.53362	3.465	3.19081	3.11918	2.5279	2.16545	2.16301	25.05	25.05
104479	Ccdc117	2.51642	3.10973	2.77134	3.03654	3.27876	3.09145	4.82289	3.82667	3.86059	4.31	4.28903	5.21222	0.737005	0.78636	0.771134	0.910237	0.952932	1.13541	4.86261	4.86719	4.69943	4.3961	3.95149	3.41297	11.3788	11.3913	11.5178	11.76	12.3562	12.6545	12.798	12.9306	13.6098	15.1413	15.4821	0.994749	1.01211	1.08084	1.11865	1.13013	1.13036	1.13039	1.13179	1.21515	1.33535	1.35503	16.7243	17.3054
104570	Smek2	4.91022	4.58551	4.8454	5.47154	4.60171	5.27066	10.1281	8.10242	8.28992	7.92754	7.68492	8.13956	0.932729	0.747487	0.64532	0.703715	0.673435	0.823948	1.4216	1.49729	1.35039	0.99264	1.07882	1.41854	37.561	37.3727	36.8306	36.1202	33.9446	32.3714	31.4889	31.8652	36.0747	39.0012	40.8186	1.06613	0.9979	0.942546	0.907116	0.861787	0.855262	0.863081	0.929222	1.04814	1.12193	1.16806	40.5677	37.5623
104625	Cnot6	1.0042	1.28951	1.12463	1.37386	1.23562	1.06456	4.52209	2.82807	2.65076	2.22796	2.12172	2.73598	1.11991	1.0097	0.757389	0.751381	0.827932	0.804744	1.67994	1.69954	1.38	1.41258	1.01243	1.11857	19.3407	19.2753	18.9497	18.3293	16.0583	14.6106	13.9138	13.3905	13.5985	14.3263	15.6571	1.0262	0.994165	0.924847	0.851424	0.744154	0.71984	0.71299	0.709997	0.724571	0.767314	0.84174	37.0788	35.5921
104681	Slc16a6	2.38472	2.30455	2.26394	2.55369	2.04142	3.10442	2.21065	3.0143	2.52902	2.95221	3.74993	4.775	0.237776	0.243688	0.279174	0.377102	0.451222	0.389348	0.229116	0.157341	0.224945	0.0838684	0.315798	0.210679	1.26385	1.26397	1.31728	1.38886	1.59448	1.8446	2.04665	2.29823	2.59249	2.66567	2.68056	0.325412	0.325713	0.32753	0.333051	0.384186	0.436376	0.457161	0.47289	0.502688	0.513347	0.515484	2.5905	2.59756
104718	Ttc7b	1.70403	1.66324	1.56503	1.83892	1.70253	1.82437	0.571051	0.423347	0.854402	0.618011	0.577554	0.477749	0.157019	0.133379	0.152656	0.167271	0.190526	0.159334	0.228465	0.312135	0.228487	0.360548	0.36907	0.248575	3.55184	3.55184	3.55042	3.53823	3.54585	3.59723	3.93661	4.22028	4.18819	4.18803	4.18803	0.0923869	0.0923871	0.0938458	0.108191	0.108823	0.113445	0.111633	0.10226	0.102165	0.102165	0.102165	4.86899	4.86899
104725	Sptssa	2.51068	2.33704	2.55763	2.65421	2.37233	2.43132	8.19275	8.12483	8.08476	7.88936	9.31465	9.00195	0.455723	0.640176	0.664158	0.625568	0.686982	0.793624	0.521284	0.691872	0.723783	0.888491	0.737306	0.930473	16.7677	16.6697	16.6817	16.695	16.7237	16.7411	16.7516	16.7761	20.224	21.2021	21.0026	0.379416	0.487175	0.490763	0.490781	0.490781	0.490781	0.49078	0.47806	0.499014	0.472411	0.471368	16.8615	16.8615
104732	4930427A07Rik	2.22319	1.85628	1.79802	1.66783	1.89765	1.49209	3.41411	3.695	3.50801	2.42498	2.52886	4.81774	0.306238	0.215086	0.192864	0.210892	0.214644	0.31279	0.795685	0.607281	0.641822	0.446468	0.636362	0.788286	4.89602	4.88257	4.82383	4.72461	4.3851	4.15345	4.02655	3.91258	4.00788	4.2528	4.59049	0.240029	0.232899	0.220858	0.210312	0.196179	0.192748	0.191717	0.191773	0.197869	0.210921	0.227839	7.57395	7.28307
104771	Jkamp	4.09319	3.60417	3.59511	3.35463	3.32436	2.81538	5.49855	4.23812	4.70549	3.50183	2.88161	3.12368	0.267757	0.161907	0.156441	0.118144	0.195646	0.195403	0.089876	0.230847	0.153482	0.112284	0.056668	0.245812	10.1086	10.0785	9.85089	9.5614	8.8683	8.29818	7.81762	7.031	6.8617	6.85615	6.85597	0.300636	0.276243	0.232101	0.226484	0.22276	0.20857	0.20448	0.203902	0.2039	0.203899	0.2039	8.64422	7.56597
104799	Vipas39	4.16651	3.796	3.81997	4.40151	4.12272	3.40331	4.86121	5.38572	5.16177	5.97973	4.88239	4.95373	0.204951	0.178504	0.125931	0.124297	0.149832	0.158929	0.868254	0.57297	0.41286	0.383614	0.490365	0.597629	6.29027	6.22795	6.05386	5.84002	5.25763	4.89891	4.73033	4.84708	5.42961	5.74789	5.92734	0.291419	0.261396	0.238727	0.225707	0.211058	0.209716	0.212492	0.23024	0.255232	0.268273	0.275788	8.50999	7.45559
104831	Ptpn23	3.39007	3.18216	3.28806	2.47675	3.5854	3.01795	7.60287	8.68479	9.62197	9.38077	6.88424	6.35101	1.04764	1.09902	1.2435	1.13906	1.01866	0.873843	2.54445	2.46229	2.53823	2.35584	2.23085	2.11035	6.72398	6.72398	6.72398	6.72398	6.68092	5.55972	5.33115	5.28935	5.28933	5.28931	5.1087	0.56419	0.56419	0.56419	0.56419	0.535489	0.443814	0.443812	0.443812	0.443812	0.44381	0.421955	25.1019	25.1019
104923	Adi1	1.62272	1.93918	1.9296	1.8803	2.0557	1.81687	2.72255	3.09815	4.11013	2.60783	2.92641	3.81896	0.338642	0.552892	0.538759	0.62932	0.529297	0.530953	0.300122	0.571809	0.579101	0.552074	0.554248	0.789991	7.86977	7.88647	7.99306	8.24283	9.29548	10.0659	10.9727	14.6002	19.9718	21.4888	21.7747	0.212444	0.218085	0.235281	0.256987	0.285597	0.290549	0.293006	0.319264	0.396826	0.414425	0.417831	11.5767	11.9514
105148	Iars	9.60521	7.79587	7.26517	7.40224	6.38093	7.47807	7.7813	10.6855	11.7098	11.9904	13.9184	12.3415	1.35848	1.4456	1.48106	1.38493	1.59909	1.51893	2.28012	2.79794	2.67925	2.27116	3.02619	3.18279	78.177	77.2966	76.2533	75.579	77.3463	78.3699	79.0378	80.6318	93.7204	94.3871	94.4079	1.1359	1.12917	1.24679	1.25145	1.25168	1.25168	1.25168	1.29537	1.27544	1.26253	1.26237	75.5029	68.5597
105171	Arrdc3	4.12972	4.28327	3.88307	3.77211	3.96501	4.33927	13.3546	10.223	10.3393	13.7409	9.91432	10.7947	3.13976	2.54749	2.52631	3.11238	1.77031	2.20717	1.54335	1.41419	1.41466	1.82215	0.929053	1.00069	5.02153	5.01061	4.96212	4.87086	4.40491	3.88409	3.4947	3.04357	3.50812	4.0713	4.44333	1.15658	1.14591	1.12227	1.08886	0.961277	0.848548	0.774441	0.701193	0.815692	0.943491	1.02691	23.5283	23.2031
105203	Fam208b	6.17013	6.51589	6.01298	5.82972	5.97308	5.16148	6.46087	11.0619	10.3388	9.19884	9.86228	7.64758	0.929844	1.13583	1.39859	1.59824	1.2363	1.13502	2.87945	2.78896	3.22723	3.96606	3.59794	3.82661	29.924	29.8886	29.8919	31.0376	34.5824	35.8957	36.5401	37.2822	37.3635	37.3643	37.3643	1.10889	1.1463	1.38802	1.62773	1.38484	1.34745	1.34708	1.34707	1.34707	1.34707	1.34707	34.5137	34.544
105239	Rnf44	3.11104	2.24695	2.32356	2.73155	2.80698	2.76899	6.41854	6.40083	7.46935	6.78122	6.15252	5.68462	2.78932	3.08868	3.11745	2.84383	2.67899	2.27667	1.87606	2.45868	2.40196	2.02254	1.87268	1.58478	5.33704	5.33704	5.33693	5.33431	4.8865	4.15984	4.1286	4.09927	4.09934	4.10724	4.2506	1.72149	1.72148	1.72124	1.7165	1.41275	1.4856	1.49375	1.48191	1.48196	1.48553	1.54518	19.1606	19.1605
105278	Cdk20	2.71287	2.75045	2.37899	2.73016	2.64564	2.68926	1.04968	0.782286	0.898504	1.03908	0.830928	0.816595	0.0584665	0.118843	0.118597	0.0829056	0.0572346	0.0683623	0.137718	0.233729	0.150605	0.0816763	0.225296	0.149625	1.55526	1.55527	1.55929	1.59476	1.71535	1.79173	1.83879	2.17732	2.61606	2.62545	2.62565	0.121844	0.121861	0.130568	0.146855	0.149963	0.149969	0.149972	0.201974	0.205701	0.205701	0.205701	1.50704	1.5081
105298	Epdr1	2.93252	3.04707	3.6061	3.61848	3.70162	2.88046	4.27699	7.07135	7.51432	7.45448	7.88251	8.05451	0.265121	0.348167	0.365075	0.381859	0.479559	0.507023	0.201508	0.400842	0.396415	0.40547	0.545206	0.673395	16.2814	16.2822	16.2819	16.1945	16.2905	16.723	17.4297	21.2811	26.1734	28.9784	30.3733	0.397504	0.398088	0.405194	0.513837	0.63517	0.684777	0.740349	0.71908	0.66835	0.71994	0.742932	9.99722	10.0177
105372	Utp15	4.67332	4.70339	4.8079	4.81059	4.60949	4.26372	8.23107	10.4264	10.5397	11.1142	8.65315	10.2865	0.689084	0.994344	1.01011	1.06639	1.05712	1.1467	0.949055	1.66961	1.66815	1.66959	1.9183	2.34729	24.5287	24.5327	24.8288	25.4897	27.0767	28.081	29.1268	33	33.7343	33.751	33.7514	1.17922	1.18797	1.37648	1.42533	1.42816	1.43498	1.54895	1.6226	1.62261	1.62261	1.62261	23.2041	23.7086
105377	Slf1	1.20888	0.994244	1.13428	0.91626	0.886119	0.995279	3.88035	2.79007	2.67603	3.22081	2.7758	3.26462	0.263593	0.242588	0.222953	0.228894	0.24821	0.373817	0.248932	0.267381	0.242283	0.307237	0.202051	0.277916	9.47016	9.42721	9.27639	9.05717	8.33587	7.81809	7.56143	7.93782	9.441	10.2237	10.6228	0.515784	0.487205	0.454872	0.431011	0.397411	0.39266	0.399323	0.450564	0.526179	0.56269	0.581732	11.8553	10.9841
105387	Akr1c14	4.20579	4.58306	3.69081	4.1923	3.3759	4.47444	2.36951	2.1026	2.05153	2.09177	2.78842	2.99495	0.0583059	0.0612186	0.0665547	0.0586783	0.087726	0.130327	0.128655	0.0566758	0.1547	0.182974	0.100241	0.260746	5.91345	5.91487	5.94123	6.03989	6.41503	6.66888	6.82946	7.06048	7.12953	7.65476	9.61854	0.0999905	0.100629	0.107028	0.116139	0.120031	0.120111	0.120116	0.120123	0.12105	0.135105	0.172597	5.4533	5.50091
105428	Fam149b	3.20416	5.04384	4.10671	5.40559	4.55951	5.32132	8.56811	7.56109	7.40178	8.27654	6.04396	7.6185	0.535689	0.377471	0.323986	0.285989	0.401783	0.503827	1.00168	0.807453	0.474305	0.609754	0.663259	0.760998	3.96647	3.93454	3.7775	3.63857	3.45181	3.41912	3.41759	3.40705	3.36545	3.19317	3.05863	0.501076	0.457434	0.425375	0.393813	0.368338	0.36575	0.365496	0.414487	0.462276	0.508174	0.526745	8.82489	7.57035
105440	Kctd9	8.98223	7.29297	7.01367	7.89529	7.07009	7.24101	7.283	7.34941	6.71326	7.95292	6.29135	6.11152	0.739769	0.907059	0.741236	0.884154	0.626505	0.686294	1.57582	1.82171	1.5788	1.55458	1.4118	1.57668	8.51905	8.46959	8.40389	8.36082	8.29211	7.95591	7.1654	6.52927	6.52516	6.52516	6.52516	1.47647	1.44164	1.43754	1.4372	1.42673	1.29767	1.16273	1.131	1.1309	1.1309	1.1309	25.1731	24.5087
105501	Abhd4	1.31928	1.81621	1.24227	1.47923	1.51925	1.38023	1.48645	1.73951	1.0001	0.975302	1.5457	0.92904	0.273949	0.230841	0.260813	0.235157	0.215261	0.232385	0.237785	0.0391796	0.109673	0.0851626	0.170478	0.0411757	3.08559	3.07366	3.01777	2.98538	3.07572	2.76037	2.53196	2.13706	2.02545	2.01954	2.01923	0.0550784	0.0491036	0.0413142	0.039633	0.0415013	0.0420161	0.042095	0.0421195	0.0421202	0.0421202	0.0421202	1.93957	1.6677
105513	Chmp7	2.55566	2.72488	1.9019	2.34072	2.12432	2.19575	7.28144	5.17937	5.6829	6.30644	4.922	5.60076	0.400747	0.323832	0.369121	0.295232	0.360698	0.381104	0.825057	0.981788	0.658395	0.658447	0.710558	0.606022	19.5715	19.5665	18.4582	16.9257	17.0691	17.1621	16.318	14.7637	14.2967	14.2694	15.0497	0.252978	0.252978	0.252978	0.252978	0.252975	0.20763	0.198497	0.198495	0.198495	0.198501	0.230332	12.9012	12.9012
105559	Mbnl2	2.84585	3.063	2.72732	2.48311	2.281	2.43297	8.24366	7.12895	7.13526	7.15588	7.24185	5.2684	1.11412	1.10645	1.15748	1.05422	0.905344	0.906099	1.51243	1.54845	1.7481	1.62856	1.29587	1.57546	20.553	20.553	20.553	20.553	20.2883	18.1946	16.9149	15.7005	15.6178	15.6241	16.2684	0.732979	0.732979	0.732979	0.732961	0.649893	0.557521	0.556969	0.556962	0.556963	0.557445	0.593245	28.2502	28.2502
105670	Rcbtb2	2.7343	3.46956	3.32304	3.58	3.57278	3.38706	6.98673	6.03571	6.32505	6.57792	6.20699	7.0938	0.559637	0.462539	0.519819	0.541882	0.516707	0.535727	0.0944146	0.100275	0.0391796	0.0984215	0.0646898	0.0433173	7.00293	6.99176	6.89783	6.80714	6.61873	6.51242	6.45244	6.38266	6.36597	5.87965	5.81947	0.275312	0.262876	0.250793	0.250619	0.250618	0.250617	0.250617	0.250617	0.24959	0.229084	0.228752	8.01624	7.4283
105675	Ppif	4.46893	4.02446	4.00708	3.55841	4.03946	3.47206	7.79293	7.34386	8.45893	7.73519	7.16098	6.92469	0.62923	0.998256	1.03394	1.17524	1.0823	1.00259	0.892624	1.1817	1.20355	1.49898	1.4227	1.26267	15.6851	15.6584	15.7337	15.9179	16.709	17.5882	18.37	20.0225	20.3955	19.9501	19.453	0.487983	0.571916	0.651123	0.68525	0.720459	0.685961	0.625739	0.57986	0.571922	0.557646	0.543907	13.9331	14.5778
105689	Mycbp2	2.92451	2.47154	2.64227	2.67949	2.97037	2.77334	6.40078	5.49726	4.42199	4.98848	4.06061	4.69192	0.36505	0.326951	0.328548	0.37063	0.444036	0.53166	0.730733	0.572818	0.720494	0.635676	0.881975	0.878669	7.4789	7.4789	7.4789	7.47902	7.88464	8.72213	9.00503	9.15481	10.0857	10.088	10.088	0.39636	0.39636	0.396361	0.396435	0.472371	0.484208	0.484245	0.486999	0.534622	0.534634	0.534634	17.1239	17.1239
105722	Ano6	3.5822	3.61026	3.3553	3.63094	3.62468	3.49475	10.3357	6.89042	7.46224	6.87358	6.18993	8.16641	0.525124	0.488436	0.486754	0.436893	0.370214	0.393774	1.02774	0.906478	0.942547	1.22499	0.783452	0.656848	23.2187	23.2187	23.2187	23.2186	22.8732	21.3705	20.3827	18.8459	16.1557	16.0892	16.0881	0.338235	0.338235	0.338234	0.338192	0.295517	0.275968	0.275817	0.260752	0.234364	0.23436	0.23436	24.1664	24.1664
105732	Fam83h	2.47688	1.87106	1.71424	2.29162	1.78089	2.14586	1.84164	1.67757	1.4756	1.23318	1.83837	1.53609	1.64548	1.63532	1.47657	1.23319	1.43074	1.412	2.66233	2.83646	2.76428	2.00939	2.84926	2.89995	5.6248	5.6248	5.6248	5.62479	5.60695	5.40627	5.22478	5.00322	4.10114	3.57899	3.56774	0.539785	0.539785	0.539785	0.539767	0.523077	0.479954	0.477705	0.477485	0.35798	0.342454	0.342362	6.29479	6.29479
105835	Sgsm3	1.54899	1.3295	1.35379	1.04837	1.12958	1.36376	2.42806	2.56792	3.29566	2.63135	2.901	2.66578	0.564519	0.557494	0.63249	0.655892	0.597221	0.608978	1.96793	1.67996	2.06548	1.51594	1.99976	2.15304	8.43316	8.43314	8.43088	8.32777	8.28323	8.77873	9.08036	9.75316	11.005	11.0355	11.0361	0.183787	0.183787	0.183787	0.183782	0.182649	0.182464	0.182466	0.199182	0.21101	0.211013	0.211012	9.65191	9.65191
105837	Mtbp	8.16406	6.82738	6.32173	6.19069	6.26455	7.57932	13.8407	13.9359	12.3862	13.1639	14.2123	15.4431	0.932641	0.975715	0.866838	0.787288	0.745859	0.866535	1.32216	1.16462	1.28752	0.907907	1.02379	1.15369	20.4884	20.3852	20.06	19.6193	18.2662	17.3004	16.7297	16.3144	17.3391	18.5172	19.5218	1.08779	1.03567	0.983759	0.946651	0.889158	0.867822	0.860146	0.870339	0.930847	0.992495	1.04409	32.1319	30.2347
105841	Dennd3	1.6136	1.04744	0.788942	0.898649	1.0308	0.748094	1.82309	2.43012	1.91092	1.62708	0.418755	0.932103	0.255762	0.154165	0.18142	0.15537	0.186	0.164213	0.727707	0.285708	0.380927	0.305227	0.376412	0.257915	1.07574	1.07574	1.08099	1.08048	0.924032	0.826684	0.77948	0.628377	0.612554	0.61252	0.61252	0.0446689	0.0446685	0.0390831	0.0319956	0.030513	0.0310209	0.0305611	0.0256059	0.0255972	0.0255972	0.0255972	1.64947	1.64944
105844	Card10	2.81039	2.37689	2.383	2.49765	2.21781	2.29915	5.21731	4.07822	3.30331	2.80076	3.03421	3.18595	0.471111	0.409899	0.345964	0.209607	0.363003	0.335855	0.674649	0.884095	0.650516	0.474554	0.660043	0.611921	1.33166	1.28185	1.19861	1.13557	1.03805	0.983351	0.936681	0.79137	0.658969	0.612309	0.591651	0.191202	0.171574	0.161061	0.15541	0.145883	0.138778	0.132299	0.112257	0.0941719	0.0877369	0.0848621	7.78516	6.89484
105847	Lmf2	5.54164	4.69783	4.49607	4.55742	4.30943	4.04691	11.3549	11.1546	9.22387	10.049	8.23603	10.9239	0.780947	1.07872	0.88625	0.861786	1.01639	1.14974	1.39698	1.32587	1.04967	0.929941	1.33162	1.54773	17.0265	17.0264	17.007	16.5408	16.0397	15.6071	15.6432	16.0669	16.1029	16.1031	16.1031	0.517181	0.517181	0.517181	0.51718	0.495225	0.388004	0.428427	0.429359	0.429359	0.429359	0.429359	24.7919	24.7919
106021	Topors	6.10149	5.36404	6.21166	6.07474	5.15977	6.12405	20.9385	19.094	17.2679	19.4102	19.8942	19.736	2.27754	1.77774	1.81349	1.92917	1.93102	2.15535	1.96614	2.01217	1.80366	1.99348	2.40309	1.94677	39.6206	39.5464	39.275	38.8415	37.0845	35.3885	34.1584	33.2172	35.9517	37.8041	38.8289	1.72068	1.68133	1.63058	1.58368	1.48291	1.43378	1.41628	1.45801	1.58263	1.65345	1.69296	49.6838	48.243
106042	Prickle1	2.50776	2.14878	1.98329	2.49938	2.42323	2.26359	0.312576	1.00149	1.43967	1.51718	1.54507	1.45245	0.1055	0.103134	0.144686	0.201107	0.288202	0.257379	0.523535	0.547263	0.39951	0.534188	1.08251	1.21725	0.591202	0.590916	0.57363	0.529279	1.22776	1.65639	1.83379	1.9603	1.96135	1.96135	1.96135	0.0381041	0.0383914	0.0555997	0.0777228	0.116708	0.117519	0.123898	0.124796	0.124796	0.124796	0.124796	2.26203	2.26203
106052	Fbxo4	2.86392	2.44838	2.73239	2.22641	2.02762	2.13957	17.6475	15.7065	12.5507	16.7152	13.689	14.6764	0.546115	0.421217	0.435748	0.56053	0.45648	0.382626	0.419769	0.412694	0.340665	0.598355	0.275838	0.528419	5.61711	5.61401	5.54074	5.41052	5.11063	4.92869	4.70744	4.13058	4.05778	4.057	4.05699	0.406378	0.399756	0.354182	0.342459	0.341087	0.335324	0.30566	0.293516	0.293509	0.293509	0.293509	6.37102	6.08658
106064	AW549877	8.20759	6.47758	6.46895	6.008	6.73043	5.54078	14.7657	14.2618	15.7446	16.3287	12.0445	11.7179	0.735013	0.554878	0.566035	0.663343	0.56273	0.526077	4.26141	3.88823	3.11738	4.22665	3.48983	3.9182	10.282	10.2562	10.0132	9.56508	8.53758	8.09108	7.89191	6.97924	6.25269	6.23966	6.23902	1.12803	1.0914	0.955176	0.879351	0.854677	0.853099	0.84798	0.72959	0.685209	0.684525	0.684479	18.4027	17.2141
106143	Cggbp1	1.96419	1.6748	1.7481	1.87071	1.85601	1.85207	5.16318	3.93317	2.56908	5.00517	2.50435	3.5258	1.20545	1.4704	1.21743	1.38534	1.36179	1.44708	1.45647	1.30836	1.00681	1.1139	1.22542	1.04959	24.1899	23.9959	23.6654	23.3717	22.707	21.7592	20.8472	19.5422	19.3133	19.308	19.3079	1.2989	1.17572	1.16265	1.16194	1.15044	1.0427	1.03685	1.03676	1.03676	1.03676	1.03676	22.7685	20.3685
106205	Zc3h7a	3.10902	2.39128	2.44667	2.29219	2.4814	2.17326	6.7849	7.68954	8.90678	8.20599	4.45983	4.49276	0.596796	0.56612	0.587833	0.632188	0.417523	0.337397	3.46825	3.11583	3.10086	3.18566	2.87188	2.93954	14.7171	14.6928	14.6481	14.5929	14.1985	13.364	12.5001	11.1086	10.9293	10.9256	10.9253	0.586152	0.577868	0.57477	0.569567	0.52681	0.476918	0.452564	0.436408	0.435202	0.43514	0.43513	19.6394	19.3387
106298	Rrn3	3.79243	4.57214	4.37748	4.73105	4.3235	3.99208	8.96263	10.5494	10.5271	11.0253	10.3082	9.27024	0.556235	0.614321	0.796803	0.795579	0.910505	0.99898	1.40068	1.31519	1.6081	1.62004	1.97045	2.04765	49.1693	49.158	49.2052	49.339	50.0745	51.0373	52.1374	57.8584	68.6497	73.286	74.9202	0.494681	0.533286	0.5826	0.615838	0.65741	0.675599	0.689568	0.716882	0.708977	0.712025	0.715278	28.609	28.9595
106326	Osbpl11	1.08096	0.974181	1.15616	1.05758	0.990953	1.12062	7.3618	6.59537	6.96669	6.3344	6.02508	5.56942	0.316955	0.274548	0.237501	0.180564	0.221758	0.220643	0.527374	0.535333	0.535762	0.476132	0.462887	0.369644	7.51221	7.46973	7.30986	7.07858	6.40223	5.95348	5.68779	5.37434	5.40039	5.58087	5.88392	0.215008	0.198776	0.178758	0.166564	0.15551	0.153554	0.153021	0.152926	0.155257	0.16125	0.170523	8.77881	7.98413
106338	Nsun3	3.14608	3.41327	3.26447	3.54228	3.12711	3.13516	7.09052	8.07346	7.20926	7.2922	7.42469	6.9439	0.166027	0.155587	0.168833	0.170895	0.152006	0.230725	0.265854	0.23976	0.220583	0.209031	0.218147	0.289765	1.99628	1.9994	2.00976	2.02533	2.08658	2.15057	2.20754	2.35679	2.47641	2.52385	2.54848	0.13756	0.139112	0.141034	0.142902	0.147943	0.152087	0.155461	0.164026	0.171191	0.174173	0.175758	4.32165	4.38197
106504	Stk38	1.52024	1.00193	1.08716	1.2642	1.15128	1.09178	6.85462	5.00426	3.51164	5.45189	4.4814	5.33914	0.512437	0.465726	0.362942	0.402766	0.441016	0.473086	2.86637	3.07579	2.51389	2.63378	2.61709	2.55762	11.1661	11.1193	10.94	10.6505	9.62661	8.88543	8.46987	8.09355	8.35651	8.88212	9.4749	0.547122	0.527514	0.498273	0.471011	0.423477	0.40638	0.399702	0.396421	0.412276	0.439012	0.468006	21.088	20.1679
106522	Pkdcc	0.727708	1.28729	1.02243	1.24148	1.01695	1.14546	0.38547	0.578678	0.620401	0.652948	0.933504	0.613789	1.48779	1.12969	1.09736	0.836216	1.75592	1.69423	1.22332	0.510298	0.895504	0.671632	1.21356	1.29305	12.2907	12.2728	11.2278	10.1304	9.43306	10.377	11.0327	12.7606	13.1577	13.1863	13.1884	1.19015	1.19015	1.19015	1.19016	1.19271	1.30659	1.46518	1.12025	1.11782	1.11782	1.11782	8.64173	8.64173
106529	Tecr	4.1657	3.82376	3.33715	3.14694	3.32612	3.63709	6.21812	5.94677	7.18933	5.44204	5.57679	7.54868	0.980117	0.960985	0.870108	0.7863	0.807581	0.990791	2.25969	2.01621	1.79505	1.35313	1.73064	2.10782	72.6877	72.3472	71.9758	71.6401	70.8146	69.5509	66.5004	60.4023	58.0465	57.8063	57.8057	0.775716	0.730829	0.730823	0.730823	0.73082	0.695244	0.698616	0.698616	0.698615	0.735603	0.824909	44.0356	41.4871
106565	Dlk2	2.59285	2.88992	3.48669	3.99735	3.69213	4.24134	1.80393	2.74629	3.69337	4.08731	3.52755	3.55877	1.66574	1.78095	2.58123	3.26191	2.86423	2.855	1.01178	1.35389	1.85474	2.48354	2.97477	3.02705	11.9955	12.1046	12.5247	13.201	16.0131	18.9843	21.4948	25.9756	24.3351	21.4844	19.3603	0.727321	0.817852	0.938087	1.04687	1.29409	1.44686	1.53669	1.60717	1.4349	1.26964	1.1502	13.7404	16.1819
106572	Rab31	3.07179	2.84133	2.86266	3.1789	3.13967	3.22004	7.5684	6.9315	7.31265	7.2425	5.6278	5.6156	0.370874	0.400207	0.452314	0.403956	0.304598	0.249158	0.464707	0.458354	0.752279	0.712395	0.38149	0.499508	31.7116	31.7116	31.7116	31.7116	31.7111	31.3256	30.2502	27.9041	26.4256	25.3167	25.1824	0.190426	0.190426	0.190426	0.190426	0.190329	0.163986	0.16039	0.160377	0.152512	0.151114	0.151114	17.2109	17.2109
106582	Nrm	3.78815	3.18527	2.9212	2.70636	3.19007	2.89105	8.61141	6.67842	6.37939	7.50805	4.80678	6.44803	1.08332	0.812004	0.707719	0.800684	0.671664	0.348969	7.83784	6.55532	6.00026	5.6324	3.6726	3.89703	8.45554	8.45143	8.4198	8.3325	7.78474	7.21421	6.80119	6.08269	5.16837	4.50942	4.28583	0.652145	0.645685	0.622294	0.584546	0.499266	0.476515	0.469886	0.452288	0.379588	0.340085	0.328176	8.06665	7.90227
106583	Scaf8	5.69396	5.57919	6.27494	7.08731	6.43036	6.67233	8.61147	9.31332	6.09974	8.22047	8.31538	9.18668	0.666426	0.688124	0.758551	0.817682	0.910894	0.929714	1.2117	1.46081	1.46984	1.52051	1.41866	1.5936	14.3829	14.3829	14.3899	14.7717	16.4378	17.1705	17.4869	18.2714	18.5825	18.5829	18.5829	0.655181	0.655186	0.6626	0.789134	0.807526	0.807527	0.80753	0.845516	0.846503	0.846503	0.846503	24.1587	24.1592
106585	Ankrd12	2.28838	1.85069	2.31244	2.17763	2.44897	2.46654	2.83602	2.88102	2.66685	3.7027	2.51936	2.05924	0.165791	0.16571	0.145724	0.155455	0.14533	0.0832815	0.240454	0.26269	0.319557	0.220182	0.311728	0.298244	2.59168	2.59167	2.59152	2.59092	2.57777	2.51238	2.35511	1.71027	1.60438	1.70286	1.95314	0.209322	0.20931	0.209245	0.209042	0.205995	0.19498	0.175685	0.133234	0.129896	0.139102	0.160626	5.74625	5.74574
106618	Wdr90	3.12393	2.48444	2.67494	2.63582	2.54887	2.6668	8.23317	6.67	6.99345	6.69975	7.75446	7.56251	0.250035	0.246126	0.251362	0.146525	0.257519	0.297385	3.02867	2.75213	3.01017	2.7479	3.15695	3.37076	3.24753	3.24707	3.24295	3.22814	3.07206	2.86496	2.72556	2.57757	2.61015	2.82813	3.35931	0.295022	0.294454	0.291655	0.284753	0.252422	0.238441	0.234832	0.233384	0.238673	0.262492	0.315691	4.80541	4.7881
106633	Ift140	5.82741	5.12853	5.87382	5.21627	5.26146	4.73499	6.23265	8.02633	7.17255	7.56409	6.67784	6.23716	0.208049	0.163472	0.221664	0.194033	0.275837	0.237783	0.785244	0.805635	1.19194	1.3373	1.51088	1.38328	3.1393	3.12308	3.09776	3.07653	3.03261	3.00792	2.99405	2.97803	2.97778	3.04505	3.60525	0.0673256	0.0640044	0.063834	0.0638294	0.0638289	0.0638289	0.0638289	0.063829	0.0638943	0.0662713	0.0813114	3.61865	3.43584
106639	Vmac	2.90193	2.85588	2.89087	3.21631	2.89022	2.64673	4.98758	6.23903	5.38142	6.00502	4.37452	5.97119	1.43848	1.25113	1.03482	1.10876	1.07107	1.39539	2.38219	2.4719	2.31543	2.04173	2.53754	2.83268	1.15349	1.15349	1.15349	1.15349	1.15349	1.15342	1.1521	1.01206	0.955911	0.68898	0.633514	0.165851	0.165851	0.165851	0.165851	0.165851	0.165851	0.165851	0.165851	0.165851	0.165851	0.165851	1.35659	1.35659
106672	AI413582	2.37174	2.16929	2.34391	2.39441	2.58549	2.12194	6.23061	11.6379	15.8849	17.2096	14.0922	12.6468	5.95223	14.8285	16.8351	20.6764	18.5544	21.0974	1.84755	4.48677	5.21227	5.7187	3.97617	4.32486	9.70244	9.70623	9.81181	9.83327	10.1268	10.0786	9.96011	8.33443	6.42472	5.14764	5.14536	1.31211	1.32948	1.5669	1.72352	1.41229	1.24054	1.23914	1.23895	1.03381	0.871868	0.770207	11.0177	11.6775
106759	Ticam1	4.0128	3.66982	3.4167	2.64733	3.0382	2.77876	2.20707	2.11498	1.77182	2.85546	1.54953	0.738201	0.901814	0.787966	0.788942	0.818269	0.971401	0.789416	3.46272	2.93207	3.17978	2.78432	3.65564	3.49478	2.06439	2.06436	2.0611	1.97434	1.39913	1.12893	1.08074	1.05873	1.05845	1.05859	1.11892	0.127809	0.127809	0.127809	0.127808	0.112222	0.108341	0.10828	0.10828	0.10828	0.108302	0.109324	3.76225	3.76225
106794	Dhx57	2.51743	2.57076	2.34444	2.68963	2.61332	2.64761	6.07055	5.06705	6.19667	8.05424	6.56893	4.3817	0.39734	0.312942	0.351465	0.329821	0.3718	0.354044	0.680056	0.525858	0.557338	0.510019	0.580741	0.668068	4.1215	4.1215	4.1215	4.1215	4.08824	4.11496	4.122	4.12154	4.40892	4.76324	5.06915	0.310815	0.310815	0.310815	0.310815	0.348996	0.347779	0.34087	0.340877	0.375289	0.394402	0.428842	8.18523	8.18523
106795	Tcf19	3.27392	2.61416	2.73433	2.39421	2.67155	2.19673	2.58646	1.95374	1.70064	1.64129	1.18148	2.37358	0.702525	0.543911	0.467107	0.399243	0.504397	0.483895	0.466563	0.315454	0.246424	0.220022	0.164467	0.290002	25.5598	25.5251	25.3577	25.0608	23.6118	21.9443	20.4964	17.3517	16.8418	18.1364	19.6319	1.35653	1.2709	1.12257	0.973869	0.762856	0.791023	0.853354	0.951696	1.03825	1.13184	1.22235	15.6568	14.2566
106821	Oard1	5.8407	4.35141	4.75309	4.13014	4.73384	3.6914	10.4279	7.91366	9.12139	9.11904	7.18352	7.5837	0.842541	0.60816	0.5546	0.495245	0.589749	0.55662	0.66035	0.439556	0.400095	0.234369	0.503592	0.553856	11.7182	11.6736	11.4843	11.1877	10.1965	9.44859	8.9755	8.53611	9.74858	11.728	13.6592	0.946189	0.891806	0.814186	0.758181	0.690184	0.674248	0.671378	0.695548	0.819913	0.984957	1.13537	12.7868	11.5681
106869	Tnfaip8	1.43999	1.00437	0.959529	0.949136	0.905357	1.20091	1.83539	2.56964	1.82545	1.78509	1.98194	1.88334	0.226313	0.286202	0.212207	0.189338	0.15183	0.187281	0.54157	0.681744	0.671456	0.696421	0.59603	0.332401	4.35994	4.3737	4.34553	4.27171	3.94427	3.69736	3.54217	3.32476	3.08067	2.70211	2.56141	0.123659	0.103258	0.097154	0.088763	0.0801349	0.0793427	0.079207	0.0787434	0.0716476	0.0766668	0.0739467	4.35449	4.27595
106878	Smim3	3.16506	3.06759	2.91579	2.6997	2.8761	2.7183	7.05627	8.76227	9.11886	9.20494	5.94642	5.60603	0.483163	0.686539	0.71431	0.692068	0.343195	0.37874	0.655657	1.05552	1.31422	1.17524	0.476208	0.495374	14.9448	14.9448	14.9447	14.9445	14.8118	13.974	13.2228	11.9212	10.2729	8.50732	8.35861	0.401141	0.401141	0.401134	0.400982	0.360896	0.312144	0.310086	0.309832	0.24468	0.22441	0.224122	11.2037	11.2037
106947	Slc39a3	2.94833	1.4793	1.93005	1.92935	1.60236	1.75729	1.64983	1.82182	1.60541	1.64294	2.21964	2.0507	0.337994	0.277822	0.24614	0.180816	0.331586	0.278455	0.552681	0.622962	0.558563	0.26803	0.808149	0.776752	3.43385	3.42866	3.39208	3.33239	3.16522	3.05593	3.00171	3.23366	3.41316	3.4206	3.42089	0.319341	0.307722	0.281474	0.269441	0.264861	0.266528	0.274026	0.314986	0.318099	0.318135	0.318137	2.97751	2.71183
107029	Me2	3.95605	3.9507	3.96249	3.94134	3.68496	3.63942	6.83444	7.54779	7.55071	8.00336	7.34212	7.20933	0.280662	0.334606	0.372175	0.437542	0.382425	0.371913	0.51687	0.54752	0.552012	0.689206	0.76403	0.759708	25.5857	25.6073	25.6328	25.7126	26.114	26.4858	26.7887	27.5926	28.7981	30.2771	31.7103	0.29006	0.294341	0.343549	0.379173	0.386096	0.389085	0.390968	0.356218	0.334327	0.351707	0.367439	20.1995	20.526
107047	Psmg2	3.4697	4.39732	4.09523	4.28117	4.20661	4.16021	7.50632	10.8214	10.3738	10.8292	10.2526	8.2635	0.470469	0.580589	0.615587	0.594671	0.825112	0.968841	0.833324	0.691303	0.742531	0.721067	1.1284	1.16858	17.5484	17.5457	17.5378	17.5016	17.5637	17.8072	18.2107	21.0953	26.0193	27.8581	28.5104	0.779792	0.778236	0.783685	0.828545	0.890406	0.920476	0.959328	1.03729	1.11438	1.16591	1.18537	14.8923	14.8592
107071	Wdr74	4.73308	5.93109	5.78181	5.66849	5.41394	6.05954	7.8881	10.4457	10.7353	12.2231	9.74665	10.8863	1.05204	1.3867	1.50576	1.28264	1.27689	1.38986	3.42644	3.1649	3.41161	3.89396	4.19276	4.07883	48.5165	48.2247	48.3152	49.231	51.7738	53.3717	54.5746	68.4685	71.0577	71.1197	71.1212	1.53806	1.86226	1.97093	2.15779	2.16245	2.16249	2.27964	2.30956	2.30888	2.30888	2.30888	45.2598	45.26
107173	Gpr137	4.45388	3.44908	3.36148	3.91191	3.68136	3.17769	15.949	14.4279	13.0045	14.8604	12.5672	12.5435	3.34628	2.07512	2.38126	2.0677	2.1868	2.05426	0.687619	0.372004	0.464517	0.40177	0.420239	0.508827	3.42125	3.42067	3.21682	2.56708	2.61826	2.47717	2.32674	2.38655	2.42407	2.42474	2.42475	0.457905	0.457892	0.457678	0.456089	0.39373	0.31227	0.325807	0.361992	0.362547	0.362552	0.362552	3.23595	3.2356
107242	AI837181	2.45782	1.86186	1.80487	1.95059	2.3508	2.12937	3.95617	3.44768	4.0455	3.4021	3.94277	3.45814	1.58426	1.62888	1.93214	1.65979	2.81582	1.03263	3.78958	2.95294	2.8546	2.30996	2.23967	1.85956	11.9464	11.9463	11.9339	11.7172	10.4846	9.57867	8.4765	7.05163	6.94124	6.94068	6.94068	2.03444	2.03427	1.98783	1.71047	1.52252	1.3632	1.19444	1.18198	1.18198	1.18198	1.18198	15.7718	15.7634
107272	Psat1	15.8566	13.4713	13.2402	14.344	11.9493	13.0153	13.1241	18.3396	16.6404	16.6277	18.2066	17.8247	2.40856	3.77636	3.67285	3.81037	3.59105	3.81225	2.68036	3.36131	3.88609	3.47266	3.81964	4.34605	192.516	192.429	192.082	193.787	198.869	202.593	205.319	210.961	241.241	246.331	246.75	2.76606	2.85511	3.50367	3.80517	3.81248	3.81245	3.81168	3.36681	3.38749	3.38674	3.38673	120.243	120.243
107305	Vps37c	5.65022	4.44755	4.39836	4.26466	4.00459	3.28814	14.6427	13.1267	12.3602	12.2442	9.37631	9.46322	0.819449	0.728954	0.761781	0.588671	0.677759	0.63175	1.16379	1.20247	1.24347	1.03033	1.08752	1.22152	6.51122	6.51107	6.48286	6.38523	6.15951	5.75863	5.56455	5.5387	5.52766	5.3504	4.91056	0.518576	0.517755	0.491707	0.472554	0.436418	0.377773	0.375484	0.375392	0.375392	0.375392	0.375392	9.80766	9.7652
107449	Unc5b	2.11916	1.68546	1.67182	1.84297	2.00438	1.54618	10.1321	9.91479	7.64929	8.89597	7.22245	7.66724	1.06676	1.06744	1.32697	1.34796	0.778622	0.620078	1.4256	1.66178	1.91759	1.31043	0.79488	0.707417	18.2612	18.2612	18.2612	18.2612	18.2611	17.9268	16.8854	15.5855	14.3865	8.7399	8.63015	0.322318	0.322318	0.322318	0.322318	0.322273	0.280354	0.272324	0.272308	0.216818	0.152309	0.152302	20.3107	20.3107
107476	Acaca	2.78664	3.00438	3.7238	3.57151	3.42223	3.43136	4.07488	3.0056	3.12658	4.40809	3.31413	4.32851	0.467263	0.529258	0.509939	0.591988	0.717689	0.722941	1.235	1.07851	1.18553	1.00191	1.9554	1.64305	24.3428	24.3428	24.3428	24.343	24.9138	27.2021	28.5372	29.9233	33.1556	34.3427	34.3433	0.548659	0.548659	0.548661	0.548741	0.638852	0.67663	0.67688	0.676884	0.663364	0.596254	0.595364	31.1085	31.1085
107508	Eprs	7.43237	6.19619	6.24857	5.89207	5.63592	5.75753	11.7031	13.9392	15.8111	15.5976	12.5136	11.8603	0.94253	1.09922	1.15038	1.15268	1.25795	1.22604	1.79881	2.14937	2.15078	1.9415	2.55569	2.48784	70.8211	70.8268	70.8531	70.92	71.411	72.0731	72.7264	74.973	80.322	86.6414	91.9137	0.666706	0.676606	0.707094	0.745673	0.79564	0.808153	0.814745	0.833016	0.828483	0.803151	0.815742	57.4332	57.6419
107515	Lgr4	1.82504	1.57143	1.68304	1.90055	1.92923	1.77543	5.81549	5.96482	4.36873	6.00014	5.16231	6.69643	0.473504	0.245107	0.2961	0.27726	0.49854	0.432049	2.52375	1.63229	1.63777	1.71222	2.10156	2.04032	12.1174	12.1174	12.1174	12.1175	12.1184	12.121	12.1267	12.2102	12.9829	15.0612	18.6003	0.380372	0.380375	0.380383	0.380398	0.380505	0.380749	0.381182	0.385856	0.418892	0.496599	0.618892	11.3155	11.3156
107569	Nt5c3	3.46114	4.78978	4.98847	4.86595	4.30854	4.75384	5.76597	8.49222	9.76177	8.87768	10.5762	8.69057	0.433849	0.743948	0.770486	0.885456	0.924751	0.926965	0.938562	1.252	1.64928	2.11234	2.4138	2.03464	17.9775	17.9779	17.8827	19.0142	23.1378	25.9465	27.822	33.2271	37.6221	37.7694	37.7736	0.463267	0.464619	0.717803	0.892574	0.988098	0.988769	0.915468	0.85235	0.875602	0.875634	0.875635	19.5395	19.5921
107581	Col16a1	3.52326	2.74709	3.26579	3.70743	3.24355	3.54945	4.89705	6.93389	7.04168	7.7255	6.81172	6.81425	0.386984	0.346547	0.450652	0.46053	0.527648	0.499644	0.453621	0.348187	0.355995	0.359627	0.598039	0.516032	6.24687	6.24685	6.2466	6.24518	6.20592	6.18984	6.66647	7.81563	7.89443	7.33024	6.80092	0.177045	0.177066	0.177333	0.178926	0.228329	0.284205	0.298598	0.232293	0.231105	0.202141	0.198979	8.19192	8.19192
107587	Osr2	4.86138	4.65731	5.1254	5.24781	4.8828	4.87194	12.1527	12.2549	12.6703	14.0951	13.4039	14.5239	0.706635	0.87445	0.916302	1.06745	1.42164	1.36523	0.760584	0.718182	0.620719	0.494355	1.30615	1.16864	2.72123	2.72146	2.72592	2.75663	3.22599	3.7023	4.41657	5.06468	4.68242	4.55938	4.54763	0.599751	0.600343	0.607888	0.644134	0.82998	0.862312	0.852353	0.730174	0.693521	0.68056	0.679403	5.76209	5.77949
107652	Uap1	1.39021	1.40188	1.58148	1.56763	1.41294	1.47682	5.34198	5.84962	4.34583	3.87086	2.55594	4.99391	0.274832	0.297114	0.277833	0.284163	0.230683	0.239028	0.60595	0.603536	0.445676	0.550884	0.381291	0.391001	16.2427	16.2427	16.2423	16.23	15.7782	15.3616	15.0823	13.2464	11.9264	11.8758	11.874	0.469704	0.469701	0.469386	0.461493	0.420788	0.420477	0.419823	0.345702	0.343368	0.343368	0.343368	13.3582	13.3581
107702	Rnh1	3.23162	3.00323	3.07873	2.85922	2.91296	2.71793	13.1059	13.4852	11.8242	10.5303	11.4262	11.306	1.609	1.70219	1.71777	1.62471	1.85701	1.6511	1.25659	1.1976	1.06163	1.01567	1.09907	1.16964	56.6771	56.6771	56.6771	56.6771	56.677	56.2184	54.2517	49.8398	44.2416	43.856	43.8301	1.2126	1.2126	1.2126	1.2126	1.21257	1.08322	1.05225	0.963733	0.937703	0.937703	0.937703	38.2983	38.2983
107723	Slc12a6	2.34543	1.53301	1.4591	1.84538	1.62919	1.6728	0.929308	0.746768	0.729096	0.964296	0.809756	0.400891	0.395722	0.392508	0.362086	0.386851	0.390137	0.408472	0.633585	0.841102	0.631737	0.562487	0.592634	0.599922	2.6939	2.69176	2.67887	2.67787	2.5469	2.41291	2.34587	1.904	1.72839	1.84469	2.06573	0.0898714	0.0892264	0.0868434	0.0826537	0.0736663	0.0717568	0.0713381	0.0712141	0.0725409	0.0778672	0.0873745	5.7333	5.68409
107732	Mrpl10	1.69072	1.26234	1.61783	1.9436	1.6011	1.54731	8.0539	8.88756	9.36259	9.17697	7.50016	9.21649	1.08482	0.945356	1.10158	0.975546	1.02111	1.18221	1.39467	1.20561	1.12839	0.83454	1.38115	1.70689	26.3482	26.3401	25.9707	24.7628	23.8665	23.9836	24.0733	24.2777	27.1915	27.3904	27.9829	1.55406	1.55406	1.55406	1.55406	1.55406	1.55406	1.55406	1.58492	1.75405	1.75408	1.87932	17.7755	17.7755
107733	Mrpl41	6.6209	6.26854	5.95424	6.26991	5.96256	5.80831	10.6235	9.96406	9.38758	9.98611	9.30826	8.70787	1.47439	2.11203	1.70137	2.01713	2.54671	2.34908	0.837948	1.0919	1.04583	1.06686	1.13157	1.23392	8.18959	8.18959	8.18959	8.18959	8.18932	8.09683	7.63468	8.34486	8.52524	8.52802	8.52807	1.58314	1.58314	1.58314	1.58314	1.58235	1.43964	1.37526	1.64853	1.64857	1.64857	1.64857	8.54621	8.54621
107734	Mrpl30	2.65938	2.60201	2.70632	3.06993	3.00049	3.34401	3.17449	4.96942	4.94727	4.92243	4.14336	5.7639	0.558406	0.486602	0.460955	0.375131	0.606981	0.478548	0.467503	0.586123	0.552242	0.676571	0.855031	0.882489	66.5975	66.5975	66.5976	66.5999	67.1376	68.7742	70.0695	72.4322	77.5694	89.0352	90.6546	1.14513	1.14514	1.14519	1.14615	1.22672	1.25776	1.25882	1.25923	1.42799	1.55756	1.56103	46.2075	46.2076
107753	Lgals2	3.37027	2.48639	2.95105	2.91943	2.60329	2.61932	0.846593	1.13579	1.274	1.17835	1.59309	0.79971	4.31584	4.42497	4.44546	4.16696	4.17422	3.94336	7.26275	6.10667	6.1158	5.77598	5.99427	6.79553	1.1903	1.19026	1.18979	1.18722	1.14264	1.10269	1.09307	1.07835	0.83688	0.732448	0.720271	0.241632	0.2416	0.241299	0.240001	0.227598	0.222458	0.22161	0.218259	0.167716	0.148431	0.146179	6.7264	6.72491
107767	Scamp1	2.00391	1.42234	1.41966	1.53079	1.6916	1.80616	3.02706	3.73657	1.67891	2.8697	2.52517	3.11194	0.159744	0.159262	0.170241	0.180274	0.177927	0.152878	0.519512	0.519341	0.457073	0.37472	0.356146	0.477532	8.50676	8.49306	8.47003	8.45044	8.40914	8.38518	8.37066	8.04228	6.71996	6.67508	6.67425	0.1174	0.115406	0.115274	0.11527	0.115269	0.115265	0.115218	0.104401	0.0921631	0.0921111	0.0921098	9.30038	9.13918
107829	Thoc5	1.56389	2.52841	2.29767	2.72046	2.65589	2.24326	7.65396	9.11184	8.13753	8.96876	8.97707	8.95976	0.401034	0.351119	0.481636	0.462135	0.55287	0.519525	0.678784	0.613154	0.569609	0.794548	0.710174	0.940288	18.743	18.7283	18.6815	18.6801	18.7032	18.7202	18.9082	21.6158	24.0508	24.1324	24.1342	0.369312	0.384598	0.43789	0.449574	0.450871	0.448791	0.479665	0.470062	0.511656	0.511655	0.511655	17.9686	17.9686
107869	Cth	4.58042	4.0743	4.11589	4.10693	3.57601	4.08422	7.58761	9.65544	8.46242	7.36755	10.0488	11.7155	0.404355	0.68059	0.642111	0.502759	0.659171	0.642617	0.516627	0.674604	0.72273	0.514002	0.941	0.9291	10.1466	10.1263	10.1474	10.4012	11.392	12.08	12.6068	14.848	15.5314	15.5537	15.5528	0.162987	0.185253	0.217194	0.26852	0.284886	0.282375	0.28551	0.285378	0.249932	0.235905	0.229299	8.18292	8.20293
107939	Pom121	3.69532	3.93786	4.15953	4.31475	3.77387	4.17973	8.34409	8.20311	8.70202	9.04907	9.45875	9.66762	1.35487	1.78673	1.9396	2.04955	2.01262	2.09559	2.62962	2.67429	3.14098	3.15979	3.8427	3.81134	4.76236	4.74789	5.27333	5.73948	6.12777	6.168	6.29098	7.61391	8.62683	8.29872	8.0544	0.661911	0.712412	0.875836	0.894311	0.895358	0.895271	0.958249	0.939842	0.929435	0.884252	0.867739	28.0573	28.0573
107975	Pacs1	0.852397	1.00403	1.16571	1.03951	0.808108	1.09272	5.86276	4.89569	4.76147	5.74503	5.94006	7.87097	0.191897	0.170067	0.163732	0.205348	0.253699	0.300104	0.311677	0.221278	0.294138	0.179704	0.528618	0.443238	1.85897	1.84054	1.80654	1.78618	1.79185	1.87958	2.04841	2.7069	2.90882	2.92366	2.92644	0.0551787	0.0537481	0.0650905	0.0727093	0.0772153	0.0845248	0.0940619	0.0945826	0.0908641	0.0911797	0.0912504	3.80218	3.60704
107976	Bre	5.11013	4.33538	4.3509	4.54943	4.62964	4.58587	12.237	11.7846	11.0582	13.5508	10.3224	10.9861	0.167329	0.144992	0.140357	0.167407	0.121668	0.11914	0.438826	0.0984136	0.330485	0.198639	0.218943	0.208563	4.29872	4.29862	4.29732	4.28983	4.1946	4.18851	4.18834	4.14286	4.28216	4.28673	4.28697	0.101126	0.101089	0.100763	0.0993565	0.0829824	0.0751745	0.0785807	0.100115	0.102175	0.102212	0.102215	5.60014	5.59741
107986	Ddb2	1.14506	1.00058	1.48412	1.42023	1.22463	1.08027	4.34715	2.77914	2.82581	2.9236	3.8373	3.32328	0.416415	0.259376	0.223968	0.182352	0.339941	0.276989	0.644889	0.269441	0.306216	0.28842	0.345239	0.350266	0.992594	0.992397	0.978611	0.92911	0.831363	0.8007	0.791264	0.787107	0.790075	0.912225	0.969647	0.112708	0.112361	0.100584	0.0905434	0.0893717	0.0893707	0.0893706	0.0893707	0.0899278	0.1055	0.110201	2.33944	2.3211
108000	Cenpf	1.40106	1.52676	1.57337	1.46202	1.31136	1.42999	3.36137	3.69309	3.04248	2.81772	2.33187	3.09283	0.410492	0.283121	0.225518	0.237752	0.235672	0.299229	0.486787	0.433694	0.363902	0.360475	0.241633	0.402961	14.3768	14.2886	13.8021	13.1225	11.7198	11.1316	10.8963	10.7548	11.2489	13.4433	15.122	0.469606	0.439394	0.381358	0.359049	0.351254	0.350896	0.350863	0.351433	0.37323	0.449859	0.498073	26.6045	24.533
108012	Ap1s2	1.97388	1.86244	2.05386	1.82321	1.89071	1.66463	4.81384	3.724	4.24778	3.11933	3.39529	3.56472	0.267305	0.200081	0.156433	0.257991	0.139592	0.143983	1.87509	1.45711	1.56866	1.48511	1.35597	1.56197	6.36665	6.33796	6.21565	6.02204	5.3618	4.85882	4.53973	4.14181	4.17716	4.33248	4.52011	0.849141	0.800899	0.729384	0.673771	0.593664	0.567099	0.556152	0.547672	0.560285	0.582275	0.607751	8.45325	7.53822
108037	Shmt2	8.71478	8.25523	8.12204	8.53661	7.5151	7.89759	11.551	13.0974	12.8218	14.5368	13.6238	15.5804	2.04382	3.30642	3.27458	3.2105	4.41399	3.10589	4.5568	6.30272	6.08801	5.73686	7.70888	7.53108	79.2889	79.0972	78.8536	78.6817	79.287	82.3629	85.017	93.1019	117.848	119.633	119.653	4.53434	4.73558	5.01892	5.26227	6.19941	6.70156	6.74813	7.27032	7.33924	6.65886	6.23204	59.1772	59.1773
108058	Camk2d	5.41848	4.42259	4.33955	4.63895	4.55435	4.78605	9.05161	8.21844	10.5096	7.72499	6.21382	7.44304	0.613906	0.663576	0.628383	0.632669	0.538427	0.548301	1.22228	1.15767	1.18129	1.10654	1.03083	1.15028	8.64623	8.64618	8.64346	8.62539	8.78348	8.51337	8.42791	8.39108	7.30052	6.36673	6.36362	0.777808	0.777808	0.777803	0.777365	0.677821	0.673132	0.673117	0.673108	0.555126	0.510594	0.510494	23.1819	23.1819
108062	Cstf2	2.11666	1.97769	2.62559	2.64505	2.24852	2.1902	4.2518	5.21787	5.26439	6.06918	5.17652	5.68119	0.437119	0.659415	0.603821	0.62979	0.706976	0.728215	0.432338	0.369578	0.495689	0.556449	0.477202	0.774572	18.6315	18.6214	18.5998	18.586	18.655	18.844	19.2144	21.0715	24.1928	26.1475	27.499	0.668688	0.663726	0.662943	0.665607	0.681812	0.757876	0.782782	0.859517	0.912363	0.900494	0.942112	17.3979	17.2486
108067	Eif2b3	4.53774	5.02955	5.08313	5.52982	4.89448	4.92483	7.49785	10.728	10.8607	9.03241	9.90307	9.13197	0.411638	0.49813	0.514998	0.593264	0.631732	0.690021	0.482011	0.796484	0.539051	0.705617	1.05522	1.00921	10.9586	10.8968	10.8913	11.0397	11.8605	12.5332	12.9284	13.3454	13.3925	13.3962	13.3971	0.304112	0.295164	0.309549	0.327025	0.355807	0.364803	0.368144	0.371122	0.371687	0.371763	0.371784	18.6587	18.1493
108075	Ltbp4	1.11062	0.745608	0.565057	0.617424	0.527632	0.571708	2.04544	1.13278	0.959806	0.324103	1.08262	1.20572	0.816199	0.710348	0.718257	0.652741	0.769995	0.837408	0.0817506	0.19034	0.0916171	0.0852555	0.310362	0.280085	1.35884	1.35884	1.35889	1.35928	1.37816	1.45213	1.51239	1.55234	1.51143	1.26164	1.09305	0.0684896	0.0684912	0.0685094	0.0686092	0.0714868	0.0764892	0.0779117	0.078255	0.0755106	0.062147	0.0546957	3.29091	3.29102
108077	Skiv2l	2.19876	1.9046	2.29637	2.09326	2.07326	1.86599	3.54722	2.31608	2.64143	2.42395	2.32065	2.58859	0.528678	0.468337	0.426744	0.387523	0.604473	0.630673	2.1323	1.9111	2.01303	1.85691	2.08346	1.86162	10.6163	10.6163	10.6158	10.6123	10.396	9.66488	9.16604	9.99002	10.3872	10.4369	10.439	0.434049	0.434029	0.433756	0.432094	0.404315	0.404434	0.424369	0.507187	0.566956	0.614183	0.614185	10.7733	10.7724
108079	Prkaa2	1.19715	1.22235	1.21531	1.57062	1.33754	1.4436	0.695101	0.597422	0.816115	0.942536	1.31757	0.956966	0.00480178	0.0191598	0.0104851	0.0286653	0.0337745	0.0345915	0.0827038	0.081585	0.116499	0.14993	0.130132	0.0690693	0.597905	0.597905	0.597905	0.597906	0.618605	0.756424	0.816636	0.851856	0.868931	1.08518	1.08782	0.026325	0.026325	0.026325	0.0263254	0.0324947	0.0375274	0.037537	0.0375371	0.0390715	0.0478712	0.0478957	1.17765	1.17765
108083	Pip4k2b	3.60795	4.01969	4.11583	4.04314	4.25395	3.97877	2.9556	3.79221	3.92674	3.20749	3.3939	3.46991	0.524116	0.718953	0.843851	0.663089	0.869679	0.890236	2.6442	2.49125	3.09117	2.73231	3.33239	3.37257	15.6677	15.622	15.5811	15.8496	17.3288	18.3772	19.1608	23.1341	24.4004	24.4651	24.4685	0.261242	0.308399	0.375958	0.470571	0.490674	0.490895	0.505305	0.450711	0.423205	0.423185	0.423185	11.5197	11.5211
108097	Prkab2	1.70204	1.80642	1.88703	1.5615	1.85653	1.52488	4.61242	4.00903	5.42915	4.80514	4.25019	3.31831	0.261264	0.297657	0.396171	0.364375	0.287397	0.137081	0.397264	0.512403	0.530019	0.534696	0.582134	0.597102	2.40446	2.40441	2.40394	2.40184	2.35805	2.2426	2.13653	2.0075	1.76859	1.62163	1.59166	0.461532	0.461444	0.460864	0.458912	0.43578	0.406413	0.393981	0.382359	0.333138	0.309806	0.30521	4.77158	4.76927
108098	Med21	4.68231	3.33739	3.26875	3.44159	3.3542	2.8633	17.5159	15.7976	14.356	17.4308	17.0921	16.0276	0.90217	0.670663	0.495505	0.609847	0.479204	0.569376	0.591481	0.462307	0.409334	0.53391	0.359793	0.423018	37.8631	37.7825	37.4963	37.0641	35.5572	34.2849	33.3585	31.8	31.7027	32.2792	33.018	0.761567	0.733155	0.70049	0.676918	0.646065	0.637204	0.633992	0.63251	0.640112	0.653405	0.668646	31.7892	30.3918
108115	Slco4a1	0.399548	0.748006	0.568271	0.608631	0.649808	0.846957	1.32266	1.92302	1.29655	1.22535	1.60896	1.16082	0.13801	0.138389	0.141787	0.151538	0.157797	0.166488	0.0468323	0.0802964	0.112984	0.105439	0.0732333	0.0814116	6.88657	6.88657	6.88658	6.88669	7.33963	7.98003	8.16442	8.36498	8.38535	8.38553	8.38554	0.720688	0.720688	0.720691	0.720942	1.0008	0.881171	0.877598	0.877557	0.877556	0.877556	0.877556	8.17815	8.17815
108121	U2af1	3.68006	3.91824	4.11371	4.37366	4.11684	4.1497	6.59463	6.38023	6.62716	6.80158	4.69974	5.97166	2.42247	3.34332	3.36199	3.48684	3.00941	3.38942	2.82148	2.9067	3.43532	3.28115	3.40458	3.5455	67.1699	66.9668	66.8107	66.7613	66.878	67.0408	67.1479	68.9692	80.1287	80.1107	82.4676	6.1698	6.401	6.64991	6.82363	7.0566	7.0911	7.05166	7.3104	7.43846	7.13299	7.29037	128.148	128.148
108138	Xrcc4	4.31202	3.95798	3.68459	3.92134	3.99803	3.91868	11.2239	10.1767	10.6076	8.99691	9.0732	9.37422	0.0931672	0.0776634	0.0809813	0.0921172	0.0593943	0.0678022	0.0391796	0.103417	0.0969935	0.159026	0.0391796	0.132334	7.23103	7.23103	7.23103	7.23101	7.01392	6.52952	6.24805	5.94834	6.20897	6.26049	6.2609	0.162563	0.162563	0.162563	0.162552	0.135032	0.119551	0.119789	0.13722	0.145005	0.145067	0.145067	8.86538	8.86538
108150	Galnt7	2.42589	2.63132	2.84689	2.85158	2.76549	2.54661	4.12813	3.90759	4.75793	5.3687	3.71667	5.41344	0.328771	0.373198	0.382071	0.383197	0.396995	0.431608	0.749324	0.786973	0.817511	0.785014	0.893088	1.00362	9.16977	9.16943	9.13942	9.16173	9.9146	10.4012	10.6893	11.0564	11.1089	12.9067	14.1478	0.188411	0.188763	0.220742	0.263877	0.293691	0.293692	0.293692	0.293692	0.292777	0.283026	0.275877	9.60786	9.60786
108153	Adamts7	1.32492	0.730859	0.531562	0.950996	0.731113	0.681875	2.32182	0.765642	0.950768	0.385744	0.451133	0.138805	0.246022	0.204478	0.170723	0.0787891	0.198603	0.170908	0.73273	0.71351	0.713482	0.678381	0.997547	1.16774	1.48244	1.48239	1.47779	1.42244	1.15537	1.02993	0.975649	0.85497	0.550376	0.548638	0.548631	0.0868983	0.0868393	0.0831164	0.0636099	0.0547981	0.0547746	0.0547634	0.04436	0.0321722	0.0321599	0.0321598	2.48814	2.48461
108154	Adamts6	5.62391	4.10246	3.80689	4.1327	3.53335	4.26124	3.99656	3.67699	2.9626	1.86292	3.41736	4.15245	0.35386	0.282896	0.269973	0.289776	0.314712	0.285175	0.410525	0.512997	0.615028	0.477583	0.634348	0.393278	4.9576	4.92037	4.85128	4.77773	4.51158	4.20344	3.93791	3.48457	3.3609	3.34322	3.33807	0.436632	0.423679	0.416403	0.40924	0.382096	0.355138	0.335279	0.304656	0.295787	0.294395	0.293975	17.2654	16.6996
108156	Mthfd1	5.62553	5.38649	5.22781	6.20232	5.05838	5.5077	5.40493	8.03735	7.61852	6.33854	8.15604	7.01778	0.513996	0.643933	0.789488	0.84089	0.932602	0.980706	0.530961	0.680093	0.797035	1.14721	1.2673	1.44939	52.8485	52.8482	52.7694	52.868	54.8255	56.1338	56.9979	60.158	69.92	70.2324	70.2415	0.452009	0.452344	0.535504	0.671768	0.69659	0.696132	0.669148	0.664848	0.700507	0.700507	0.700507	46.7796	46.7797
108645	Mat2b	2.83663	2.49776	2.39185	2.16714	2.2206	1.82784	7.7978	4.93297	5.48706	4.83053	6.18254	5.34622	2.07325	1.72985	1.59194	1.35491	1.44285	1.40436	1.37177	1.15746	1.17973	0.767011	1.12746	0.842149	16.0006	15.9576	15.8169	15.6184	14.8908	14.0473	13.2118	11.2493	11.1155	11.8166	12.7546	0.634954	0.612948	0.584932	0.557714	0.490577	0.445993	0.417757	0.381896	0.415246	0.475692	0.537871	22.5255	21.5794
108671	Dnajc9	2.08814	1.57278	1.42759	1.83172	1.60701	1.62042	10.2552	8.57196	8.10817	8.80299	8.00714	9.95439	0.922455	0.797322	0.509377	0.591558	0.72813	0.849502	1.04422	0.802082	0.519785	0.498778	0.626311	0.772746	39.2409	39.2398	38.7309	37.8	35.5833	34.1215	33.1584	31.6489	31.3109	32.6253	36.0805	1.81131	1.80633	1.48436	1.44664	1.44469	1.44469	1.44469	1.44469	1.4447	1.60129	1.67325	32.747	32.2869
108679	Cops8	1.67633	2.07277	2.20312	2.46757	2.26432	2.18758	3.37094	3.57923	4.84385	5.09326	4.14706	4.55958	0.606777	0.923502	0.888432	0.912864	0.909834	1.05391	0.977489	0.93093	1.28301	1.11069	1.44649	1.23164	39.3276	39.1436	39.2534	39.6251	40.5674	41.2314	42.2042	49.0769	51.0874	51.1902	51.1955	0.973102	1.17344	1.25274	1.27824	1.27874	1.26627	1.3079	1.40217	1.40217	1.40217	1.40217	29.2245	29.2358
108682	Gpt2	3.5775	3.43885	3.43565	3.22694	2.9869	2.94701	9.37051	8.29225	9.78462	7.63394	9.38757	8.74046	0.817755	0.8902	0.908155	0.554816	0.990249	0.904656	2.22475	2.43096	2.5839	2.09458	2.97036	2.37499	7.36303	7.33658	7.06228	6.90493	7.22877	7.45046	7.60391	7.8806	8.11862	8.5952	9.21063	0.162452	0.153865	0.150422	0.149476	0.148961	0.148913	0.148931	0.149419	0.15415	0.164827	0.176237	6.36638	5.99224
108686	Ccdc88a	3.12574	2.36719	2.28592	2.39941	2.30609	2.44167	11.6169	8.46892	7.773	7.17891	6.21463	7.58285	0.437572	0.371376	0.31833	0.347184	0.242436	0.291571	1.34892	1.25817	1.1175	1.52182	1.12828	1.26824	11.2416	11.2134	11.119	10.9732	10.3748	9.73979	9.19035	7.98002	7.55409	7.71113	7.96141	0.572272	0.561169	0.547161	0.5331	0.494916	0.465004	0.4426	0.398017	0.384709	0.394033	0.406924	22.3598	21.8439
108705	Pttg1ip	2.2459	1.29104	1.52528	1.63135	1.63922	1.52701	9.4932	8.34905	9.36389	8.39531	7.58701	7.73534	0.677117	0.789115	0.744613	0.553532	0.573952	0.524709	1.26641	1.30324	1.18803	0.951152	1.2545	0.955799	79.9502	79.824	79.4533	78.964	77.3885	75.9808	74.794	70.6463	62.4219	56.4605	53.2619	1.08208	1.04417	1.01528	0.999274	0.979407	0.963605	0.909477	0.796041	0.653584	0.60205	0.576567	48.417	46.4956
108755	Lyrm2	1.85745	1.33102	1.33015	1.21442	1.42473	1.02194	10.8915	8.29599	9.3115	9.09409	8.06416	9.71648	0.768869	0.892999	0.907842	1.22451	1.86306	1.78785	0.652101	0.557705	0.47659	0.522825	0.600216	0.612875	6.28737	6.13522	5.88182	5.68306	5.32113	5.14754	4.96541	4.26158	4.22888	4.22886	4.22886	0.183662	0.183662	0.183662	0.183662	0.183662	0.183662	0.183662	0.183662	0.183662	0.183662	0.183662	7.87603	7.87603
108767	Pnrc1	4.00068	3.30287	3.10096	2.97791	3.04107	2.57896	17.6277	12.5132	12.9478	12.2096	10.0446	7.35168	6.62353	6.47415	6.50349	6.59426	4.98349	4.59238	3.27613	2.64539	3.02851	2.83349	2.07371	1.01634	8.1855	8.13787	8.38465	8.44876	7.9288	7.00968	6.12872	4.23699	3.84404	4.19249	4.58305	1.7853	1.72644	1.61294	1.49144	1.1912	0.998821	0.87797	0.696065	0.691843	0.75963	0.828186	13.4644	12.4313
108797	Mex3b	3.4205	2.81607	3.21818	2.69865	3.03907	2.80905	5.42804	2.75524	3.2352	2.20264	1.90974	2.1075	0.857721	0.49453	0.661194	0.334656	0.119372	0.370773	0.413819	0.203567	0.243904	0.287756	0.225964	0.0636583	2.03374	2.0234	1.97932	1.75494	1.25058	1.2878	1.25591	1.13687	1.17514	1.3129	1.47943	0.163608	0.154069	0.139229	0.1255	0.0991916	0.0875754	0.0821463	0.0772797	0.0827693	0.0929629	0.104665	2.93838	2.68226
108837	Ibtk	5.67448	7.51688	6.99458	6.7671	6.84899	6.78193	16.4642	15.4281	14.067	18.1854	15.1506	16.0951	0.571158	0.549929	0.556873	0.56455	0.698657	0.685932	0.691899	0.667455	0.710102	0.655945	0.763414	1.10619	8.05824	8.01434	7.93068	7.84641	8.12357	8.73815	9.11284	9.75148	10.0518	10.1309	10.1639	0.476006	0.461139	0.456773	0.458515	0.473031	0.487384	0.498468	0.521182	0.533767	0.537435	0.539028	18.5607	17.9225
108841	Rdh13	2.085	2.68737	2.40355	3.43738	3.39307	3.05657	4.33275	4.64307	6.27996	6.41111	5.3776	5.40397	0.368872	0.458405	0.534562	0.595112	0.621388	0.601738	0.622774	0.554146	1.01704	0.970406	1.12823	0.912709	8.45514	8.43421	8.43186	8.65073	9.82093	10.6417	11.3359	13.0931	13.4617	13.4707	13.471	0.33294	0.355756	0.417684	0.506223	0.556939	0.562434	0.545683	0.522083	0.522194	0.522195	0.522195	7.85617	7.89611
108857	Ankhd1	5.33845	4.83244	5.12632	5.47095	4.74952	5.34779	8.2919	7.8097	7.97409	9.12044	6.97182	7.41806	0.535925	0.482078	0.451897	0.529943	0.472179	0.557103	3.50877	3.59199	3.4882	3.24693	3.51131	3.51998	9.80162	9.80162	9.80162	9.80169	9.82617	9.56012	9.43141	9.69491	10.5217	11.5481	11.898	0.632963	0.632963	0.632963	0.632964	0.626019	0.563543	0.563049	0.604838	0.629021	0.629022	0.629022	24.8364	24.8364
108897	Aif1l	2.04581	2.01704	1.98994	2.05425	1.72709	1.87191	0.189569	0.64807	0.834446	0.655683	0.717145	0.905882	0.0883623	0.0992448	0.108774	0.107831	0.185256	0.136713	2.93288	3.22697	3.26617	3.66123	3.2537	3.83935	2.63904	2.63761	2.65414	2.72897	3.22952	3.73415	4.16474	5.54729	6.41795	6.51933	6.5305	0.0269338	0.0316038	0.0441845	0.0631601	0.0847075	0.0753835	0.0662913	0.0569205	0.0545425	0.0542841	0.0542267	1.4833	1.54191
108899	2700081O15Rik	2.34176	2.1428	2.17562	2.10783	2.10803	1.96333	2.56714	2.21158	1.73818	1.51886	1.59877	2.01944	2.34568	2.00558	1.80769	1.59119	2.02975	2.08905	2.64572	2.75472	2.04398	1.69352	2.01437	2.33073	5.76777	5.7087	5.52225	4.98685	4.62983	4.98729	5.17076	5.32026	5.32698	5.32699	5.32699	1.30547	1.22325	1.19805	1.17758	1.01053	1.00578	1.00571	1.00571	1.00571	1.00571	1.00571	10.8938	9.92876
108900	Fam72a	6.14511	6.69268	6.77462	7.33688	7.01142	6.90493	9.83581	11.124	10.488	13.6035	13.6272	13.3161	0.204189	0.21476	0.335285	0.358015	0.316222	0.174251	0.126944	0.148808	0.218738	0.168447	0.230972	0.235372	2.10168	2.10877	2.17127	2.31319	2.74299	2.95523	3.0464	3.13018	3.43259	3.58084	3.60278	0.226474	0.235914	0.273561	0.309811	0.333708	0.3351	0.335373	0.33918	0.374591	0.386611	0.388354	3.68786	3.98143
108907	Nusap1	2.312	3.18478	2.77717	2.92076	3.12991	2.95305	11.2052	10.3639	8.2008	7.52184	9.25531	12.9125	0.611992	0.370175	0.239216	0.210621	0.304421	0.396786	1.7866	1.46854	0.81169	0.828645	0.938568	1.29116	25.6068	25.4872	25.1026	24.4884	21.8201	18.9942	16.6082	11.8005	11.5751	13.7314	16.1374	0.371435	0.331579	0.263646	0.196398	0.138939	0.157104	0.169861	0.168313	0.190537	0.227681	0.265756	24.281	22.2795
108911	Rcc2	3.32359	3.2139	3.66342	4.17671	3.34178	3.97857	5.24307	5.76281	5.63107	7.46445	6.42366	6.52089	1.54474	2.00538	2.28709	2.10495	2.59844	2.26738	1.8779	2.37207	3.20037	3.07979	3.57586	3.50188	59.2182	59.0465	58.7392	59.4425	61.7755	63.3267	64.6969	80.4185	83.8725	83.9818	83.9853	1.45351	1.63228	2.10101	2.37929	2.40233	2.38174	2.43276	2.32633	2.30772	2.3076	2.3076	50.9529	50.953
108912	Cdca2	9.15802	7.34453	7.10647	8.1208	7.16282	7.37832	9.20384	8.17697	10.069	10.1541	8.85885	10.5388	1.01177	0.808739	0.672713	0.645278	0.682493	0.804866	1.37121	1.37107	1.21642	1.48496	1.16334	1.23139	13.6369	13.5585	13.2406	12.7474	11.2483	10.3651	9.97102	10.3998	12.1946	12.8728	12.6479	0.988849	0.939108	0.863451	0.802599	0.723961	0.704994	0.700374	0.715623	0.808358	0.909558	0.976107	26.1966	24.4375
108927	Lhfp	2.67938	2.23274	1.79361	2.07713	2.03494	2.13702	6.81158	7.31864	7.10123	6.21373	6.53118	6.52309	0.449304	0.529213	0.496814	0.45563	0.329511	0.34294	0.514384	0.422519	0.488374	0.571443	0.456095	0.414259	48.7488	48.7488	48.7488	48.7488	48.6372	46.8333	45.2451	42.8453	40.8454	32.4588	31.8915	0.543819	0.543819	0.543819	0.543814	0.52502	0.473015	0.472345	0.472334	0.425451	0.355815	0.355556	42.6687	42.6687
108934	Smim13	2.06806	2.59279	2.43727	2.89475	2.6339	2.67173	3.15812	3.99617	3.94697	3.54073	3.67138	3.64248	0.13233	0.295377	0.333593	0.384364	0.327454	0.339845	0.252946	0.544332	0.635387	0.775302	0.677323	0.761075	5.07287	5.07598	5.08863	5.31216	6.46473	7.37277	7.98687	8.9478	8.81013	7.84421	7.37626	0.0638738	0.0691722	0.136816	0.152159	0.12989	0.131702	0.131941	0.131708	0.123263	0.109408	0.105123	4.24544	4.40522
108960	Irak2	1.01181	0.875674	0.721163	0.76412	0.77117	0.679636	1.40826	0.595171	0.934189	0.703486	0.485811	0.291114	0.230509	0.245253	0.233561	0.234098	0.158155	0.117132	2.96692	3.10982	3.12101	3.21624	2.21103	2.13953	3.08307	3.12047	3.17574	3.15023	2.85837	2.55917	2.31195	1.72646	1.11734	1.08102	1.0663	0.0476244	0.0515952	0.0521625	0.0509949	0.0452997	0.0405804	0.0373013	0.0313448	0.0284	0.0275802	0.0272287	5.27063	5.72228
108961	E2f8	2.55086	2.22313	2.09542	2.48129	2.33809	2.45323	5.45246	3.80409	3.83918	3.54888	3.1936	3.94541	0.494821	0.593976	0.475089	0.466749	0.340636	0.481535	0.585702	0.653581	0.348914	0.533888	0.287621	0.727583	3.52708	3.52596	3.51677	3.48498	3.15823	2.79842	2.65547	3.01066	3.65383	3.71723	3.72672	0.463484	0.462586	0.458237	0.446971	0.382626	0.349405	0.344632	0.407343	0.481636	0.488652	0.489757	12.4699	12.4333
109019	Nabp1	3.23206	2.59461	2.76526	3.22619	2.83199	2.2204	21.7138	21.1885	18.27	19.0642	18.519	19.3121	0.987859	1.40706	1.1754	1.12993	0.831383	0.974863	0.692731	1.21031	1.1439	1.02739	0.58213	0.519042	3.53682	3.53594	3.52567	3.48237	3.155	2.97825	2.9342	2.91922	2.84069	2.59872	2.46027	0.849789	0.848455	0.83885	0.810693	0.720644	0.704902	0.702612	0.701193	0.679632	0.620911	0.589994	13.4672	13.424
109065	Dnaaf2	4.67777	5.55038	5.24201	5.52791	5.63844	5.3064	3.35325	6.66819	7.35861	6.14637	5.72901	6.1893	2.69041	3.25239	3.2427	3.18931	2.90235	3.16433	2.30556	2.47293	2.74012	3.22667	3.36511	2.94674	8.03713	8.01997	7.94968	7.93795	7.96934	7.98437	7.72172	10.1288	10.6495	10.664	10.6644	0.55288	0.570564	0.649128	0.675214	0.681299	0.669361	0.657889	0.774857	0.768983	0.76898	0.76898	7.15951	7.15951
109077	Ints5	2.97426	2.0439	1.85676	2.24793	1.78621	1.95225	12.3869	12.9079	11.4443	12.7632	11.7886	11.2322	1.60159	1.81644	1.59287	1.7184	1.52346	1.55335	4.77501	4.25521	3.94923	3.76095	4.16162	4.41181	16.1194	16.1183	16.1091	16.0764	15.6401	14.7591	14.0578	14.9738	16.7693	16.9521	16.9747	1.17348	1.17179	1.16401	1.14485	1.01647	0.927896	0.947139	1.1675	1.23061	1.23512	1.23592	14.2454	14.2015
109082	Fbxw17	1.56403	1.43676	1.55412	1.34896	1.65385	1.55459	5.87027	4.44554	5.02036	4.9436	4.65839	4.6392	0.580474	0.526082	0.495089	0.42438	0.582284	0.570028	0.811926	0.910664	0.782996	0.762973	0.840928	0.895497	3.22277	3.19472	3.11629	2.97332	2.64077	2.5048	2.50959	2.51717	2.51859	2.53408	2.60987	0.72401	0.734512	0.694307	0.638602	0.607173	0.674976	0.689744	0.689888	0.690367	0.695302	0.718327	9.557	9.17406
109129	Mmadhc	2.44954	2.99848	3.23848	4.00566	3.60486	3.5008	9.48311	9.31431	9.11336	9.08713	8.70914	7.33802	0.644541	0.571737	0.598434	0.74717	0.814152	0.750214	0.737124	0.667356	0.64315	0.834275	0.93973	0.980006	54.88	54.8168	54.7391	54.6719	54.5204	54.4232	54.3612	55.2571	65.4605	66.08	66.0989	1.17653	1.1631	1.16298	1.16298	1.16298	1.16299	1.16306	1.24021	1.41672	1.41706	1.41706	48.472	47.9149
109136	Mmaa	5.11918	4.63803	4.89596	5.05751	4.60446	4.50282	12.7786	11.2653	9.66998	11.1324	9.5123	9.71587	0.34418	0.149232	0.223934	0.174267	0.215683	0.275404	0.358359	0.299095	0.272016	0.136222	0.366488	0.389025	2.54397	2.54324	2.49526	2.40126	2.20494	2.11946	2.08299	2.05675	2.05674	2.4035	2.70179	0.399596	0.396407	0.343643	0.326387	0.322941	0.322926	0.322925	0.322926	0.323236	0.396596	0.424948	4.3347	4.16916
109151	Chd9	1.79034	1.96974	1.68235	2.01731	1.878	2.18227	1.74586	1.6101	1.80003	1.65847	1.35079	1.67811	0.417685	0.322095	0.323593	0.331563	0.271469	0.283596	0.35988	0.488713	0.410584	0.607022	0.551115	0.559139	4.28925	4.28925	4.28923	4.28864	4.12336	3.87953	3.76198	3.03056	3.01895	3.01895	3.01895	0.168888	0.168888	0.168881	0.168729	0.153128	0.149525	0.143716	0.11893	0.11887	0.11887	0.11887	13.3328	13.3328
109154	Mlec	5.6518	5.59345	5.87261	6.3788	6.17007	5.8879	9.33622	10.0464	9.46141	9.01921	8.13719	9.6819	1.57383	1.19621	1.24469	1.03701	1.31293	1.35101	1.87794	1.61489	1.42958	1.366	1.58876	1.65234	61.6616	61.1842	60.592	60.0707	58.8541	58.0264	57.4633	56.5211	55.77	49.6809	49.2214	1.27787	1.16658	1.16602	1.16602	1.16602	1.16602	1.16602	1.16602	1.1222	1.01963	1.0196	47.489	43.3322
109161	Ube2q2	2.38414	2.28621	2.51415	2.33675	2.35998	2.63103	2.05364	2.63493	0.813769	2.30165	1.15545	2.41414	0.290909	0.322985	0.349143	0.434977	0.462088	0.523521	3.11939	3.67578	3.53052	3.61092	3.31399	3.37769	10.8962	10.869	10.8277	11.0531	12.9618	14.0771	14.6971	15.4131	17.9528	18.1257	18.1273	0.399361	0.427568	0.485247	0.622441	0.68757	0.687571	0.687572	0.670463	0.636441	0.636483	0.636482	12.8002	12.8003
109168	Atl3	7.5703	6.29408	6.69266	7.0469	6.28824	6.59266	12.9671	14.5384	14.5357	13.3484	11.9168	14.0586	0.749664	0.72232	0.632518	0.6274	0.731856	0.86809	0.988963	0.951345	0.953618	0.744248	0.686996	1.20396	23.4359	23.3434	22.8029	22.0947	20.4709	19.523	18.9734	18.0244	16.742	16.649	16.6446	0.664975	0.617258	0.538902	0.521174	0.517413	0.517257	0.516929	0.49941	0.473032	0.472316	0.472269	25.8053	23.3574
109181	Trip11	1.62441	1.29888	1.1736	1.23298	0.974013	1.02411	6.40076	4.81243	5.557	4.56403	3.96161	5.37819	0.314768	0.255663	0.242678	0.23228	0.277519	0.223833	0.428515	0.271883	0.35416	0.486107	0.418364	0.258476	7.56937	7.53364	7.42915	7.28055	6.74201	6.24378	5.857	5.14385	4.99658	5.11369	5.24329	0.230142	0.22182	0.213188	0.205439	0.187398	0.175398	0.167356	0.153846	0.152216	0.156023	0.159911	14.1831	13.6162
109212	Fam64a	3.01244	3.02358	3.02045	3.62299	3.3586	3.41037	5.99442	3.60905	4.55774	4.95597	5.18204	6.89247	1.61691	1.66939	1.31343	1.77921	1.88901	2.22733	2.28956	1.83462	1.71383	2.03928	2.15216	2.76779	34.8277	34.8277	34.8277	34.8277	34.8277	34.8345	35.5144	38.2747	43.9274	44.1644	44.1728	3.07918	3.07918	3.07918	3.07918	3.07918	3.09129	3.38592	3.58562	3.90542	3.90542	3.90542	29.0885	29.0885
109246	Tspan9	1.06677	0.508322	0.990882	0.948581	0.690264	0.802582	0.876319	0.992709	0.944253	0.963641	0.883004	1.01787	0.265937	0.288164	0.300742	0.262619	0.219413	0.202317	0.657144	0.640615	0.506615	0.450571	0.458017	0.259064	26.732	26.6787	26.575	26.4604	26.1209	25.8032	25.4948	24.1142	20.2693	16.2438	13.0839	0.164348	0.158306	0.156315	0.155362	0.153692	0.152103	0.150233	0.139929	0.113514	0.0902304	0.0734355	15.6103	15.0174
109275	Actr5	1.60494	1.28369	1.60802	1.65582	1.55925	1.27584	2.979	3.24747	3.97095	4.67899	3.13509	4.94022	0.363191	0.445671	0.486874	0.435423	0.611857	0.510196	0.824308	0.810832	0.939217	0.948996	1.21598	1.09321	2.80164	2.80162	2.8155	2.80326	2.80314	3.53198	3.82595	4.10592	4.6194	4.61969	4.61969	0.58298	0.58298	0.642332	0.716288	0.732116	0.732203	0.732204	0.806326	0.843126	0.843125	0.843125	6.06159	6.0616
109294	Prex2	1.26939	1.2295	1.04497	1.34132	1.03371	1.45255	2.19393	3.09277	2.63807	2.22123	2.31768	3.23326	0.0746744	0.0698912	0.0601694	0.0835292	0.0842492	0.0932705	0.115547	0.0391796	0.130491	0.283437	0.0635877	0.0849895	3.39543	3.39347	3.37607	3.34438	3.2662	3.22426	3.20254	3.18055	3.13768	2.84683	2.58833	0.113124	0.112044	0.108284	0.106466	0.10594	0.105925	0.105923	0.105892	0.103711	0.0924949	0.0853814	4.48587	4.42625
109333	Pkn2	1.8741	1.71919	2.15304	1.81313	1.95358	2.12928	9.20042	6.32014	4.28397	7.19143	6.49548	7.33471	0.684598	0.656105	0.593236	0.676387	0.550557	0.62469	1.38132	1.43536	1.50715	1.39013	1.35994	1.23622	33.9717	33.9115	33.7071	33.3919	32.5275	32.5535	32.3378	31.2627	31.4054	32.4495	33.4774	0.937031	0.913407	0.886531	0.862892	0.812363	0.783584	0.767056	0.74877	0.766512	0.793079	0.817105	34.709	33.6661
109346	Ankrd39	1.12309	1.42149	1.37061	1.32758	1.66005	1.46884	3.50415	3.5717	3.2451	3.79022	3.47992	4.07664	0.224746	0.233014	0.160779	0.243227	0.343047	0.466192	0.399535	0.349083	0.454059	0.46568	0.620428	0.625128	1.41218	1.41218	1.4128	1.43634	1.61953	1.70542	1.76787	2.00523	2.01563	2.01564	2.01564	0.105141	0.105144	0.105958	0.121076	0.131526	0.131825	0.139765	0.150069	0.15007	0.15007	0.15007	2.44879	2.44898
109624	Cald1	4.9421	4.14906	3.42968	4.01921	3.48441	4.07338	12.5196	11.8777	11.4657	11.2477	12.8887	9.59971	2.52083	2.3833	2.79375	2.91454	2.3798	2.0134	5.3703	4.76288	4.89163	5.30286	4.65626	4.07262	136.385	136.333	136.168	135.898	134.567	132.662	130.401	120.237	102.627	90.4998	82.2191	1.71041	1.70277	1.69366	1.6839	1.65218	1.61861	1.58449	1.45373	1.24794	1.10849	1.01278	160.236	159.468
109652	Acy1	4.21322	2.55471	3.04543	2.91959	2.67131	2.24322	2.70131	3.65918	3.15657	3.48651	2.80418	2.65154	1.44044	1.72273	2.0082	1.85449	1.92321	1.88363	7.56169	8.33295	8.26911	8.55033	9.12962	9.39163	7.23664	7.14166	7.1341	7.15371	7.19486	7.15467	6.82011	6.30673	6.05763	4.90849	4.88187	0.426225	0.529456	0.561314	0.563048	0.562987	0.529939	0.448494	0.389377	0.360628	0.303533	0.303333	9.99577	9.99577
109660	Ctrl	0.0498359	0.0498359	0.0498359	0.0935515	0.0498359	0.0498359	0.979589	1.41946	1.23605	0.41449	1.76861	1.34593	0.999414	1.2744	1.20867	0.609758	1.9413	0.608913	0.68903	0.626685	0.669923	0.590395	0.731444	0.669879	0.577875	0.577876	0.577988	0.584098	0.862001	1.01194	0.761179	0.466256	0.466166	0.466166	0.466166	0.298618	0.298618	0.298618	0.298618	0.298618	0.298618	0.298618	0.298618	0.298618	0.298618	0.298618	2.08571	2.08571
109689	Arrb1	1.57286	1.1797	1.05161	1.17101	1.13989	0.9466	1.02657	1.51908	1.15455	1.23987	1.58155	1.79146	0.085068	0.0858432	0.0645364	0.038873	0.103723	0.0559402	0.105622	0.109075	0.143285	0.172671	0.279736	0.0522403	2.39109	2.39109	2.39107	2.38824	2.33641	2.30051	2.27828	2.08209	1.45424	1.43873	1.43839	0.0653563	0.0653563	0.0653304	0.0636788	0.0612865	0.0612862	0.0612854	0.0456147	0.0393158	0.0393157	0.0393157	2.29383	2.29383
109700	Itga1	1.01702	0.940504	0.638855	0.683251	0.725286	0.808714	1.81024	0.964586	1.3082	1.15522	1.33382	0.797013	0.154005	0.129445	0.145135	0.143654	0.137075	0.181505	0.0391796	0.0391796	0.0391796	0.0391796	0.0391796	0.0391796	1.03269	1.03249	1.03139	1.02857	1.0042	0.959325	0.910392	0.796719	0.762134	0.759896	0.759545	0.0286344	0.0285389	0.0282845	0.0278441	0.0257326	0.0237613	0.0225859	0.0213148	0.0210902	0.0210655	0.0210594	1.00076	0.996406
109711	Actn1	3.56989	3.19135	3.48882	3.6287	3.6639	3.62713	15.1002	13.4798	11.5279	11.9612	12.6306	12.2791	2.188	2.51743	2.92835	3.07084	1.84298	1.71167	2.20351	2.45656	2.45424	2.99352	1.66695	2.0219	72.6345	72.6345	72.6345	72.6345	72.6345	71.1869	67.1481	63.9835	59.9	40.2866	40.2492	1.29762	1.29762	1.29762	1.29762	1.29762	1.14288	1.14066	1.14066	0.869139	0.719052	0.719052	116.241	116.241
109778	Blvra	1.65791	1.41983	1.4202	1.48779	1.56851	1.5463	8.89807	6.75615	6.88226	9.13727	8.21714	8.73141	0.251579	0.327451	0.280431	0.241147	0.248199	0.270161	0.531144	0.447449	0.438467	0.354196	0.516491	0.798336	13.5187	13.5187	13.5187	13.5187	13.5187	13.5188	13.5787	14.2259	14.3754	14.3809	15.3124	0.161395	0.161395	0.161395	0.161395	0.161395	0.161404	0.168979	0.171688	0.171688	0.171698	0.197337	11.2515	11.2515
109801	Glo1	1.92499	1.85743	1.81406	1.7811	1.92693	2.09697	6.71925	6.05849	6.25487	6.862	6.55516	7.16153	0.329334	0.38419	0.424432	0.460754	0.563868	0.618489	0.750985	0.809135	0.763133	0.729075	1.36174	1.14995	46.7562	46.7373	46.7065	46.6769	46.6147	46.6118	46.694	48.2442	54.0298	56.9697	57.9243	0.323923	0.321744	0.321423	0.321423	0.32209	0.32374	0.326599	0.349003	0.387868	0.399349	0.402801	27.8575	27.6657
109815	Vimp	1.91764	1.97791	1.84992	1.87062	2.08599	1.70209	6.8154	7.60589	7.60014	7.69164	4.9079	5.93072	0.640189	0.455262	0.516551	0.474217	0.348393	0.208635	0.806332	0.66656	0.944847	0.810144	0.634723	0.480108	23.6198	23.6198	23.6198	23.6198	23.5802	22.1739	21.22	19.5488	16.6064	16.5528	16.5518	0.352685	0.352685	0.352685	0.352685	0.336333	0.295212	0.295211	0.259424	0.247147	0.247147	0.247147	23.8903	23.8903
109900	Asl	1.31374	1.75554	1.62769	1.7934	1.55402	1.71063	2.90528	3.74894	3.041	2.83288	2.09204	3.60053	0.173033	0.229584	0.303457	0.287203	0.208704	0.187965	0.316687	0.408824	0.433694	0.17996	0.465335	0.528343	8.37498	8.37586	8.3831	8.40698	8.60824	8.85301	9.04404	9.48434	11.2251	12.9612	13.5279	0.213345	0.213862	0.216088	0.220785	0.235119	0.239226	0.240469	0.248048	0.304074	0.338024	0.346723	6.88261	6.90623
109901	Cela1	2.8849	2.67736	1.9601	2.38247	2.49392	2.06741	2.31522	1.70555	1.97948	2.2052	2.02534	1.41309	0.481787	0.458419	0.532228	0.374889	0.353575	0.375043	0.254124	0.17611	0.201241	0.241725	0.118119	0.131783	3.99976	3.99976	3.99976	3.99976	3.99976	3.99975	3.99967	3.98475	3.15016	2.64627	2.60247	0.158769	0.15877	0.15877	0.158769	0.158769	0.158767	0.158754	0.157149	0.114728	0.103922	0.103212	4.31737	4.31737
110033	Kif22	0.869267	0.579878	0.602464	0.715725	0.650836	0.73955	4.52899	3.05282	3.15949	3.77357	3.21544	3.89761	0.683778	0.62349	0.491415	0.53999	0.738694	0.692519	4.41184	4.22744	4.41382	3.87901	5.50558	5.96888	27.0849	26.9694	26.5646	25.9676	23.9853	22.4072	21.3167	19.761	20.7928	23.3025	26.057	0.56048	0.521417	0.47762	0.447696	0.411976	0.403086	0.400589	0.405284	0.441992	0.498233	0.554159	24.4043	22.4144
110052	Dek	2.28756	2.5899	2.37361	3.06845	2.76146	3.17121	3.23702	2.87942	3.55579	3.58332	3.51244	3.33216	1.54094	1.35579	1.26108	1.37731	1.49234	1.64509	2.93676	2.85806	2.49028	2.77041	2.93868	3.53054	78.4719	78.4719	78.4719	78.4719	78.4719	78.4719	78.4719	78.472	83.9196	87.5535	95.4652	2.82596	2.82596	2.82596	2.82596	2.82596	2.82596	2.82596	2.82598	3.10698	3.15799	3.51265	122.27	122.27
110074	Dut	3.50244	3.83412	4.09194	4.68528	4.3529	4.13644	8.58961	9.0969	9.01333	8.72896	9.55959	9.61325	1.64789	2.0972	1.95838	1.80601	1.92704	2.48842	2.09335	2.70015	2.56135	2.18892	2.92008	3.20913	31.5496	31.4701	31.125	31.1098	31.2879	31.4026	31.4677	32.7861	37.8519	38.0205	39.2059	3.0461	3.12802	3.52811	3.62907	3.65271	3.65289	3.65324	3.68776	3.61441	3.6261	3.78452	36.4463	36.4463
110094	Phka2	1.49523	0.620259	0.600819	0.657423	0.887337	0.774825	3.40728	3.11245	3.52413	3.40369	3.96947	4.29119	0.136034	0.0820509	0.0975703	0.0575312	0.0966362	0.0759752	0.645217	0.482285	0.64708	0.580099	0.679189	0.609174	3.44024	3.43925	3.42196	3.34457	3.11519	3.04071	2.99731	2.49822	1.97957	2.02362	2.32945	0.149539	0.148753	0.140291	0.117979	0.0945748	0.0936819	0.0936102	0.0935973	0.0938162	0.0969757	0.11469	5.1096	5.06759
110109	Nop2	9.02514	8.05818	7.35176	8.30757	7.38061	7.60814	11.9817	14.3017	13.1201	14.2382	14.4078	13.4189	1.81178	3.00476	3.11436	3.32148	3.29656	3.1111	4.22576	4.42759	4.40305	4.56704	5.75125	5.5167	116.457	116.21	116.341	117.94	122.409	125.502	128.257	146.869	152.683	152.979	152.994	3.2492	3.50434	4.00065	4.22403	4.23346	4.23451	4.30373	4.27834	4.27833	4.27833	4.27833	86.6816	86.7645
110175	Ggct	2.70422	2.48709	2.11087	2.28118	2.35171	2.0499	2.04267	3.00103	2.83783	2.46248	2.99921	3.83286	0.0368909	0.0556535	0.0606166	0.0632728	0.0571981	0.00628287	0.283866	0.24882	0.196336	0.164235	0.459327	0.28458	2.33184	2.33524	2.33892	2.34972	2.54279	2.7254	2.86012	3.32888	4.20018	4.60276	4.74851	0.182443	0.186904	0.213474	0.261103	0.302892	0.315354	0.324511	0.315379	0.326668	0.352052	0.361407	3.65332	3.76379
110198	Akr7a5	2.05558	2.06587	2.18039	2.62476	2.19633	2.13304	10.0242	10.2854	10.2731	10.1996	9.56083	10.9024	0.429014	0.289549	0.365154	0.332614	0.601155	0.43165	0.404949	0.321744	0.291047	0.316342	0.591515	0.631103	7.2502	7.2502	7.25021	7.25034	7.26704	7.45361	7.82606	8.79254	8.77451	8.59831	8.57395	0.363143	0.363144	0.363161	0.363306	0.374142	0.428678	0.45715	0.461569	0.431907	0.42941	0.429297	4.22722	4.22724
110253	Triobp	4.40871	5.54221	5.49404	6.16656	5.37012	5.5314	9.17726	12.5752	13.3273	15.0333	15.0541	15.1744	0.55417	0.536424	0.790422	0.759881	0.953304	0.816047	0.48144	0.527419	0.617005	0.557104	0.733924	0.590272	2.77368	2.76325	2.69633	2.66633	2.95695	3.06887	3.09944	2.99795	2.54629	2.54407	2.54404	0.195821	0.204951	0.24036	0.272637	0.308469	0.309282	0.310637	0.311054	0.311055	0.311055	0.311055	6.37639	6.37785
110279	Bcr	1.74437	1.52485	2.11076	1.7928	2.09232	2.16361	0.562155	0.504236	0.585558	0.905685	0.330949	0.557397	0.461419	0.567762	0.508614	0.43824	0.486639	0.461187	1.0417	1.09722	1.22302	0.989741	0.910789	0.915787	8.32485	8.32485	8.32485	8.32485	8.32511	8.41614	8.74362	9.04935	8.48665	7.35638	7.34912	0.362307	0.362307	0.362307	0.362307	0.36228	0.353956	0.345792	0.345655	0.305542	0.280324	0.280299	15.1105	15.1105
110350	Dync2h1	0.329372	0.495263	0.353923	0.308986	0.563819	0.487522	1.80584	0.982608	0.96816	0.870481	0.73552	2.01735	0.0962572	0.0778259	0.0765064	0.0807068	0.0819307	0.103298	0.242858	0.0391796	0.0618464	0.0861364	0.0391796	0.152973	2.80179	2.79503	2.77009	2.72908	2.57386	2.45264	2.38157	2.31446	2.37142	2.5042	2.69827	0.106063	0.104094	0.101138	0.0981394	0.0920241	0.0893997	0.0882724	0.0875995	0.090224	0.0955558	0.103155	5.78472	5.66121
110351	Rap1gap	0.893593	0.496203	0.498346	0.818008	0.635793	0.415306	0.895931	0.415389	1.00979	0.619333	1.11739	0.647829	0.0966806	0.0875675	0.0892819	0.0510666	0.112005	0.0785951	0.198053	0.173591	0.212968	0.0976422	0.162361	0.0698364	1.46318	1.46318	1.46318	1.46318	1.46316	1.45232	1.41265	1.35126	1.16346	0.796733	0.785132	0.0292613	0.0292613	0.0292613	0.0292613	0.0292534	0.027523	0.0268133	0.0268061	0.0187541	0.0156982	0.015696	1.38773	1.38773
110391	Qdpr	3.59033	3.37531	3.64043	3.99485	3.81146	3.48082	2.94924	5.49663	6.51268	6.07119	5.3133	4.52724	0.146206	0.378142	0.395116	0.353866	0.407798	0.359641	0.405048	0.355304	0.624255	0.675088	1.11866	0.581104	16.2737	16.2807	16.3749	16.5873	17.7508	19.0648	20.1406	22.4647	25.44	27.9928	29.5748	0.296217	0.332823	0.395671	0.46371	0.601146	0.650782	0.661776	0.609786	0.563255	0.581975	0.60021	18.7888	19.3695
110454	Ly6a	1.28331	1.00709	0.803804	0.889363	0.698307	0.810982	0.473215	0.519291	0.268751	0.0802378	0.410279	0.302558	0.632436	0.598642	0.493622	0.536213	0.442589	0.434862	0.152286	0.298511	0.0815509	0.254056	0.0391796	0.0391796	6.99766	6.99687	6.92444	6.74762	6.32474	6.04947	5.8704	5.59677	4.82383	3.22684	3.134	0.0694033	0.0690323	0.0574166	0.0549812	0.0549182	0.0549181	0.0549181	0.054915	0.0394325	0.0310932	0.0310501	6.01861	5.97262
110521	Hivep1	1.32602	1.54468	1.68764	1.68895	1.65751	1.74963	2.40374	2.03742	3.12437	2.92045	1.59203	1.48502	0.326056	0.349508	0.373416	0.349822	0.293309	0.246656	0.446636	0.348606	0.416655	0.415511	0.445951	0.534708	4.02704	4.02704	4.02704	4.02704	4.02704	4.02703	3.99131	3.62094	2.78096	2.78089	2.78089	0.185793	0.185793	0.185793	0.185793	0.185793	0.185789	0.177487	0.155812	0.1283	0.1283	0.1283	10.0587	10.0587
110524	Dgkq	1.03459	0.606662	0.382503	0.570896	0.642352	0.551902	4.23871	4.04558	3.28272	4.02422	3.99	3.76011	0.766017	0.567738	0.433346	0.459997	0.814061	0.798129	1.27161	1.32581	0.841873	0.855067	1.43693	1.45244	2.97891	2.96656	2.90324	2.80981	2.59766	2.53084	2.56031	2.955	3.08741	3.09239	3.09301	0.735182	0.707212	0.656218	0.626529	0.610611	0.621558	0.647711	0.744053	0.762373	0.763228	0.763349	6.26755	5.72133
110532	Adarb1	2.74463	2.31771	2.79121	2.84791	2.53658	2.9454	1.89525	2.55235	1.07119	2.3797	2.86183	3.81206	0.212342	0.286241	0.301583	0.25484	0.498078	0.461119	0.524361	0.621502	0.485141	0.528554	1.33853	1.03864	3.32782	3.32962	3.34372	3.39118	3.94027	4.86194	5.59907	6.50207	6.33967	6.01603	5.87902	0.167335	0.168521	0.173544	0.185543	0.25636	0.304642	0.321541	0.329844	0.315587	0.300602	0.29498	4.89938	4.94967
110596	Arhgef28	1.06034	0.629224	0.654795	0.869509	0.660287	0.751677	2.30267	2.49546	2.77556	1.31636	1.41151	2.01036	0.208244	0.193822	0.200768	0.184376	0.152701	0.11014	0.624208	0.318941	0.687203	0.527173	0.304683	0.126451	5.07565	5.07556	5.0739	5.0616	4.6875	4.0872	3.72716	3.00476	1.99575	1.96044	1.95903	0.0935454	0.0935185	0.0931925	0.0913922	0.0700734	0.0631784	0.0621839	0.0492148	0.036356	0.0361184	0.0361043	7.42438	7.42173
110616	Atxn3	2.56364	2.31364	2.71804	2.53474	2.27372	2.45358	2.41306	3.52789	3.096	2.42042	1.96825	2.48723	0.167649	0.248181	0.265577	0.217709	0.271931	0.236144	0.542405	0.472193	0.429344	0.461825	0.745557	0.444865	4.04732	3.99863	4.06916	4.17141	4.57922	4.72988	4.81372	4.91108	4.91643	4.9165	4.9165	0.206603	0.208152	0.233539	0.254476	0.259218	0.256131	0.252109	0.220171	0.220161	0.220161	0.220161	5.08699	5.0888
110639	Prps2	1.25877	1.5206	1.6545	1.6177	1.68913	1.27202	2.78124	2.90847	3.60756	3.56192	3.60409	4.33552	0.152891	0.170297	0.129673	0.164043	0.267224	0.225686	0.235472	0.325292	0.224809	0.320322	0.366277	0.602061	8.82081	8.82081	8.81404	8.79897	8.91517	9.44449	9.96301	10.9665	13.6086	13.8216	13.8291	0.178912	0.178914	0.185997	0.206332	0.221886	0.246239	0.250599	0.268049	0.261216	0.262124	0.262163	9.67452	9.67468
110695	Aldh7a1	2.16208	1.88593	1.8498	2.48156	2.03458	2.03748	3.81071	3.18145	3.71219	3.17646	3.17584	3.18362	0.197399	0.185329	0.186067	0.183177	0.216285	0.25836	0.168631	0.195801	0.397872	0.1745	0.299802	0.414285	6.03743	6.03398	6.02082	6.01295	6.02013	6.02762	6.03194	6.104	6.64549	6.67703	7.30214	0.109977	0.113622	0.128639	0.140699	0.146277	0.146511	0.146538	0.151774	0.160914	0.157004	0.169193	7.04055	7.04055
110750	Cse1l	5.28288	6.27626	5.91145	6.70926	6.30683	5.87927	13.6573	16.7105	17.4716	20.0572	16.8195	15.5928	1.30956	1.41644	1.60663	1.61115	1.62318	1.80269	2.84508	2.97919	3.43053	3.03848	3.54677	3.49603	93.4562	93.4499	93.2654	93.207	93.2898	93.3474	93.3856	96.0162	112.094	112.861	112.893	1.3802	1.38669	1.58207	1.67435	1.67925	1.67925	1.67921	1.66145	1.68318	1.68319	1.68335	79.3078	79.3078
110809	Srsf1	8.85114	11.9821	11.5689	14.0093	12.0396	13.9989	16.1474	13.5624	16.0921	16.9331	16.1908	14.7456	4.29742	4.48538	4.98586	6.01239	5.47963	4.99106	4.81114	5.80266	6.09884	7.27051	7.1365	7.33643	126.766	126.776	126.89	127.363	131.494	135.743	138.893	153.174	167.241	168.127	168.192	6.87969	6.89076	6.96225	7.14803	7.64273	7.7457	7.83751	8.73469	9.11228	9.12658	9.12819	130.941	131.328
110826	Etfb	1.4163	1.30015	1.66559	1.73158	1.53124	1.3442	3.39406	3.37234	3.90385	3.7994	3.91433	3.28107	0.331365	0.180723	0.246026	0.206628	0.275965	0.387137	0.487408	0.25998	0.227361	0.273982	0.299324	0.351647	23.5276	23.4657	23.1287	22.8229	22.0707	20.7565	19.8045	18.5313	18.3354	18.3318	18.3317	0.256194	0.238263	0.23018	0.230138	0.2187	0.199845	0.19962	0.199616	0.199616	0.199616	0.199616	23.5127	21.6439
110911	Cds2	1.98913	1.45954	1.75499	1.79399	1.5241	1.65285	5.72246	3.97857	4.74832	3.76815	4.04173	3.05988	0.236311	0.239415	0.192756	0.108137	0.240257	0.216739	0.557813	0.400792	0.328652	0.437571	0.46011	0.341302	7.17626	7.16228	7.1152	7.04456	6.77476	6.51106	6.29673	5.88721	5.87048	6.04819	6.25977	0.232478	0.225941	0.218841	0.213015	0.201547	0.195445	0.192013	0.188006	0.191272	0.197555	0.204526	7.25465	7.00455
110920	Hspa13	1.25595	1.08966	1.20167	1.30815	1.18149	0.968846	2.49356	2.26225	1.81314	1.35445	1.54008	1.51849	0.284877	0.294346	0.249525	0.243717	0.168147	0.329176	0.575829	0.346348	0.315571	0.32116	0.389922	0.289143	19.4853	19.4691	19.2309	18.9753	18.35	17.4693	16.6369	15.1061	14.6155	14.5836	14.5815	0.19206	0.18296	0.166212	0.166107	0.163685	0.144221	0.143729	0.143723	0.143723	0.143723	0.143723	13.302	12.4169
110948	Hlcs	1.59378	1.74775	1.47876	1.38111	1.56336	1.7084	5.36704	5.9786	4.47026	4.76607	4.95363	5.69835	0.0548917	0.0468234	0.0393769	0.0302398	0.0662824	0.0685164	0.0391796	0.0391796	0.0820373	0.120777	0.0623797	0.0391796	0.699073	0.699073	0.699073	0.699074	0.699139	0.695924	0.699923	0.872175	1.15267	1.18288	1.11167	0.0228198	0.0228198	0.0228198	0.0228197	0.022825	0.0282902	0.0337104	0.0372847	0.0361583	0.0361025	0.0330197	1.96968	1.96968
110962	Mbd6	6.05359	4.42417	4.29808	4.61654	4.41853	4.0589	4.03772	2.91254	3.08376	2.40617	1.96511	3.39791	2.65712	1.5774	1.69338	1.32231	1.57869	1.74606	3.99643	3.17933	2.96321	1.99566	2.88543	2.89341	1.48235	1.48234	1.48222	1.47992	1.21602	1.0457	1.03765	1.02875	1.03817	1.09596	1.48744	0.202784	0.202783	0.202734	0.201959	0.155069	0.142335	0.141918	0.171063	0.208195	0.216692	0.211757	15.3892	15.3891
111173	Erc1	2.29166	2.64285	2.23499	2.73358	2.65451	2.88932	4.2872	3.98157	3.3883	4.01594	2.92862	4.3861	0.254532	0.2568	0.246034	0.242657	0.202711	0.196274	0.604296	0.801703	0.653558	0.494707	0.623482	0.458058	6.42825	6.40873	6.33947	6.24519	6.30761	6.19651	5.99639	4.90789	4.70797	4.83967	5.00023	0.20626	0.201485	0.194346	0.186636	0.168082	0.15806	0.152937	0.147324	0.148705	0.153071	0.158164	13.1995	12.8556
112406	Egln2	1.353	1.425	1.69606	1.60917	1.40209	1.14654	7.21828	4.61658	4.24561	4.75714	3.54924	5.8185	0.810615	0.851709	0.889267	0.916661	0.917125	0.745945	1.10928	1.33676	1.20727	1.03538	0.853839	1.08232	15.0623	15.0437	13.6252	12.2423	13.1219	13.8323	14.3151	15.1201	15.328	15.3375	15.3379	1.08433	1.08433	1.08433	1.08433	1.08433	1.08433	1.08433	1.08433	1.08433	1.08433	1.08433	11.8598	11.8598
112407	Egln3	0.318049	0.057813	0.274082	0.390189	0.378394	0.41186	3.27243	2.6579	2.66556	2.10205	2.55676	3.15654	0.100803	0.0548199	0.0694721	0.0877204	0.0330557	0.0423482	0.192149	0.0951762	0.0712276	0.0778593	0.14726	0.0921444	1.06495	1.06495	1.06495	1.06495	1.06495	1.06495	1.06495	1.06452	0.790527	0.727486	0.7696	0.0250264	0.0250264	0.0250264	0.0250264	0.0250264	0.0250264	0.0250264	0.0249868	0.0166981	0.0174861	0.0181547	1.09916	1.09916
11305	Abca2	1.22653	0.851397	1.1583	1.10648	1.03859	1.66767	1.04452	2.14309	1.49975	1.49191	2.19471	1.97996	0.160334	0.172965	0.131489	0.119412	0.310251	0.326486	0.150625	0.185405	0.196412	0.157232	0.360523	0.474488	2.51984	2.47972	2.44197	2.41203	2.3364	2.28967	2.41138	3.23567	3.30247	3.30268	3.30268	0.207007	0.205358	0.205056	0.205035	0.225923	0.28648	0.342199	0.406223	0.40625	0.40625	0.40625	3.63362	3.3194
11308	Abi1	1.31075	1.26216	1.25344	1.22335	1.10888	1.3444	8.29596	6.4711	8.12369	7.79921	5.83238	7.12256	0.772711	0.762309	0.693544	0.722881	0.652586	0.739539	2.24485	2.67206	2.50215	3.16644	3.10272	3.48477	27.7439	27.7439	27.7439	27.7439	27.606	26.2628	25.5	24.6735	24.193	22.875	22.8631	0.872957	0.872957	0.872957	0.872957	0.807068	0.773881	0.77388	0.773881	0.735942	0.719382	0.719381	33.9271	33.9271
11350	Abl1	1.42591	1.03148	0.931276	1.00095	1.27889	0.597986	3.4385	2.89374	2.23917	2.26622	2.32787	3.43127	0.713017	0.614961	0.660222	0.612299	0.568917	0.575523	1.99545	2.42916	2.39454	2.25832	1.80557	1.69897	15.6004	15.6004	15.6004	15.6003	15.4134	14.137	13.3471	12.6337	12.2391	10.8699	10.8305	0.494699	0.494699	0.494698	0.494664	0.45004	0.399952	0.399281	0.399263	0.377576	0.343697	0.343429	22.4046	22.4046
11352	Abl2	1.72573	2.1771	2.30839	2.20504	2.09475	2.41594	4.78184	5.07231	4.66159	5.09664	4.98508	5.29415	0.58395	0.731771	0.774646	0.859109	0.695831	0.666559	1.32884	1.37163	1.6282	1.66437	1.07898	1.33172	12.3168	12.3251	12.5828	13.3353	14.8897	14.7005	13.8046	13.0348	13.0166	13.0166	13.0166	0.319695	0.323097	0.373709	0.409114	0.406677	0.356417	0.339817	0.337863	0.33786	0.33786	0.33786	23.8205	24.1598
11363	Acadl	1.07147	0.761721	0.636807	0.701956	0.554874	0.718437	2.26483	1.93101	1.8111	1.44181	1.30049	1.48351	0.304301	0.221114	0.184964	0.139012	0.106088	0.199815	0.420051	0.394461	0.178223	0.221666	0.217205	0.239048	7.88151	7.86171	7.56587	7.09934	6.38522	6.19096	6.13725	5.46159	4.86799	4.86884	4.86915	0.200105	0.194766	0.16359	0.147641	0.132192	0.131804	0.131608	0.112596	0.122405	0.138722	0.139706	21.2767	20.6039
11364	Acadm	2.36583	1.49616	1.61026	1.9625	2.00789	1.61003	5.28175	4.81419	4.55718	4.55137	5.57318	4.71124	0.436321	0.341924	0.212084	0.189969	0.354832	0.274838	0.369451	0.407096	0.243879	0.123733	0.318967	0.376596	17.7511	17.7332	17.6704	17.6052	17.0971	16.3647	15.6849	13.7456	13.0575	13.8179	14.9573	0.263138	0.258368	0.252377	0.204735	0.15955	0.206532	0.198104	0.183458	0.18618	0.19983	0.216862	14.045	13.7558
113868	Acaa1a	2.50669	2.09662	1.79397	2.03995	2.05131	2.02735	5.55896	3.72109	3.51662	3.16567	3.06796	4.06237	0.563335	0.250524	0.205292	0.192807	0.356012	0.487723	0.478416	0.359041	0.252388	0.156466	0.301407	0.397543	3.23381	3.23365	3.25255	3.26031	2.83112	2.59537	2.52734	2.4669	2.46303	2.46562	2.50794	0.519452	0.518674	0.467652	0.319563	0.341241	0.423825	0.42632	0.42637	0.426385	0.427102	0.437523	4.5169	4.49104
11416	Slc33a1	6.04584	7.49231	6.68474	8.22955	7.16052	8.0849	8.1735	7.09068	8.62545	8.96424	6.53424	7.58098	0.612832	0.479066	0.589646	0.636027	0.636946	0.73025	0.439894	0.347669	0.411717	0.470118	0.509748	0.416215	14.0979	14.0979	14.0979	14.0979	14.0979	14.112	14.5908	15.7633	16.4895	18.0689	18.133	0.465445	0.465445	0.465445	0.465445	0.465447	0.473574	0.528214	0.529046	0.576435	0.598735	0.598737	12.0153	12.0153
11419	Asic1	1.95607	1.24899	1.20769	1.65022	1.53901	1.25886	0.0857942	0.0802378	0.404761	0.278764	0.10982	0.581576	0.185386	0.12528	0.184328	0.151772	0.226502	0.197354	2.51611	2.46254	2.78733	2.66903	2.55467	2.73485	1.93648	1.93648	1.93648	1.93648	1.95138	1.97048	2.05108	2.5306	2.5984	2.59946	2.59947	0.0574371	0.0574371	0.0574371	0.0574371	0.0592772	0.0592783	0.0761006	0.0771019	0.0771018	0.0771018	0.0771018	2.01164	2.01164
11430	Acox1	1.48987	1.30826	1.21205	1.08645	1.25333	1.04159	5.85635	3.96596	4.98172	6.15783	3.02219	4.18149	0.444099	0.389707	0.334309	0.361941	0.326319	0.276736	2.46529	2.70544	2.43176	2.68834	1.95298	2.21506	12.1643	12.1643	12.1642	12.1639	12.1075	11.543	10.6749	8.99699	8.57324	8.57867	8.81428	0.408676	0.408675	0.408653	0.408438	0.389547	0.314594	0.291234	0.287395	0.287435	0.288918	0.301429	9.62676	9.62672
11432	Acp2	1.38381	1.52861	1.3083	1.43383	1.37514	1.37002	4.39556	3.32044	3.66831	3.4541	3.53235	2.76563	0.625363	0.426911	0.392198	0.298271	0.392796	0.482094	0.709026	0.458604	0.397104	0.375781	0.54874	0.538925	7.67398	7.66875	7.62014	7.49333	7.02743	6.74155	6.58447	6.41247	6.35067	6.08836	6.48221	0.450467	0.445218	0.421983	0.394402	0.372221	0.370695	0.370487	0.370574	0.375688	0.407055	0.477707	9.46417	9.2758
11443	Chrnb1	1.00756	0.827622	0.864056	0.639717	0.683614	0.816056	2.98305	4.47256	5.30853	3.60781	1.73468	2.81691	0.181923	0.216494	0.184527	0.146418	0.0820162	0.00480178	1.04956	0.826186	0.684708	0.453186	0.864974	0.541951	3.10075	3.10075	3.10043	3.08907	2.82735	2.61787	2.4851	2.29246	1.81777	1.55077	1.5411	0.105104	0.105102	0.104793	0.0973919	0.0765379	0.0764652	0.0764645	0.0764259	0.0543969	0.052241	0.0522281	2.8334	2.83325
114584	Clic1	3.33573	2.56205	2.47459	3.07554	2.42397	2.67941	8.3077	6.14387	6.23331	4.15878	4.59565	4.77397	3.55324	2.62416	2.71203	2.28275	1.94171	1.93664	2.65547	2.11633	1.58599	1.42761	1.41794	1.37426	161.488	160.902	159.378	157.447	151.26	145.47	140.095	119.956	89.1507	75.0283	69.1583	1.20787	1.0983	1.0114	0.94852	0.839484	0.787943	0.758006	0.692891	0.630766	0.605067	0.593086	112.95	104.926
114601	Ehbp1l1	5.58766	4.67184	4.55425	4.77733	4.92406	4.36471	8.50156	7.62317	8.30268	7.3644	5.50689	5.62707	1.93863	2.34728	2.43031	2.46856	1.44489	1.0689	3.0558	3.93106	4.11327	3.16274	1.8474	2.0331	19.8144	19.8144	19.8143	19.8137	19.6558	17.7351	15.3581	13.3345	9.53363	7.3986	7.32623	0.700674	0.700673	0.700657	0.700452	0.670577	0.517006	0.475146	0.468684	0.306971	0.260404	0.259016	35.8483	35.8482
114604	Prdm15	2.72768	2.63783	2.76089	3.61572	3.16538	2.8034	3.43076	2.92695	3.23825	2.08101	2.37396	3.59502	0.44805	0.480987	0.499793	0.371292	0.53572	0.606275	0.638015	0.726077	0.712207	0.636919	0.67712	0.946495	3.20718	3.19928	3.15528	3.04159	2.74178	2.72932	2.90597	3.38647	3.48836	3.49717	3.49914	0.483515	0.474831	0.45282	0.453207	0.445421	0.477668	0.517901	0.578834	0.590715	0.591949	0.592242	8.4813	8.23138
114606	Tle6	0.988883	0.710602	0.788232	0.478018	0.829545	0.93452	0.0802378	0.10346	0.225711	0.120945	0.23081	0.0802378	0.912495	0.428397	0.474587	0.275726	0.62434	0.79838	0.536698	0.321051	0.341716	0.152325	0.518863	0.426992	1.08781	1.08781	1.0878	1.08546	1.00593	0.946191	0.908795	0.855816	0.846433	0.847658	1.28533	0.0598177	0.0598177	0.0597954	0.0563341	0.046538	0.046532	0.0465321	0.046532	0.0465321	0.0467589	0.0958576	1.01918	1.01918
11461	Actb	6.50463	5.85557	5.79708	5.85945	5.9434	6.4919	45.0696	36.4362	28.0135	38.9544	38.6673	41.3569	27.3222	22.9081	23.7517	24.02	20.3758	18.3222	19.2927	18.9629	17.48	19.6627	16.9201	14.1603	3514.38	3513.67	3485.81	3459.1	3386.39	3326.25	3276.81	3152.69	3039.17	2424.33	2289.03	13.2189	12.5023	11.335	10.3643	9.94333	9.94258	9.94256	9.94206	7.64153	5.61647	5.60174	1376.6	1250.9
11465	Actg1	6.60883	4.75042	5.3981	5.36821	5.40792	4.94304	36.5442	31.4913	25.4776	33.9485	29.4575	26.8426	15.2115	14.9828	13.5705	16.9196	12.5633	10.9427	16.6514	16.7269	14.3254	18.2025	15.4639	13.0323	823.459	819.637	811.959	803.744	781.651	763.407	746.783	675.472	533.035	450.088	408.803	11.8087	11.2132	10.9827	10.8711	10.6762	10.488	10.2672	9.16679	7.26082	6.26218	5.76475	878.083	831.65
114663	Impa2	3.06749	3.32433	3.61849	3.40823	3.15333	3.19938	3.37909	4.84063	5.53967	5.0346	4.5144	5.9896	0.269513	0.324602	0.425286	0.450977	0.476082	0.511691	0.39525	0.462493	0.42458	0.546188	0.484398	0.675159	6.62843	6.61983	6.55664	6.82125	7.99801	8.63408	8.96157	9.95071	11.4895	11.5013	11.5013	0.343143	0.352524	0.482056	0.63144	0.67135	0.671394	0.671415	0.661889	0.629141	0.629132	0.629132	8.81017	8.82698
114674	Gtf2ird2	10.9941	10.9365	10.6808	11.9457	9.69337	11.6326	12.3363	12.1145	12.9882	11.5261	9.35835	12.4431	0.268612	0.261771	0.32245	0.350972	0.353413	0.288282	0.115209	0.150103	0.102947	0.0795106	0.234158	0.0391796	1.27337	1.27337	1.27337	1.27337	1.27349	1.28623	1.43462	1.79076	1.75289	1.5898	1.58422	0.141474	0.141474	0.141474	0.141474	0.141572	0.148756	0.187255	0.200283	0.191177	0.176264	0.176004	2.29921	2.29921
114679	Selm	0.898851	0.486347	0.827686	0.691165	0.679741	0.648618	3.41868	2.76445	3.32179	2.25364	1.62225	2.57623	4.01117	6.11878	5.308	7.00368	4.54322	3.34042	6.84905	6.14291	6.30101	6.61693	5.49126	5.13661	3.61026	3.61026	3.61001	3.60502	3.41598	3.22743	3.11434	2.97	2.83466	2.25468	2.17309	0.137928	0.137924	0.137726	0.134814	0.113339	0.112712	0.112697	0.112684	0.103736	0.0838955	0.0829021	3.77984	3.77962
114713	Rasa2	2.00419	1.70592	1.84771	1.75861	1.64451	1.65721	4.87556	4.81295	4.36486	5.93661	4.41237	5.10855	0.386242	0.533434	0.500157	0.619015	0.299908	0.375077	0.826067	1.14015	0.996702	0.68664	0.927546	0.67299	7.0355	7.04485	7.07509	7.11577	7.20739	7.16976	7.01124	6.06313	4.97593	4.55749	4.3582	0.530105	0.535211	0.54091	0.544959	0.545435	0.53284	0.514239	0.441813	0.369459	0.341012	0.327125	15.2214	15.4054
114714	Rad51c	3.18195	2.91773	2.62776	2.45034	2.146	2.24833	7.7419	6.37943	5.69988	5.66968	4.57815	6.66026	0.206629	0.163023	0.0642503	0.0559175	0.116913	0.103768	0.356521	0.15666	0.1896	0.0391796	0.254893	0.197076	2.87401	2.83914	2.71581	2.54003	2.02069	1.69019	1.51291	1.3609	1.50112	1.77182	2.07824	0.142937	0.126009	0.105767	0.0915077	0.0737984	0.0690868	0.0675268	0.0677672	0.0763861	0.0904694	0.105673	4.60889	3.93165
114741	Supt16	6.27592	5.92171	5.83515	6.37142	5.77996	5.99572	8.05177	7.55665	8.39166	7.83175	6.14733	7.22433	0.968498	1.17349	1.21443	1.21293	1.28585	1.49187	1.66915	2.01975	2.35642	2.09871	2.39938	3.21457	51.268	51.2022	51.1427	51.1635	51.2131	51.2393	51.253	51.9482	66.1266	66.5605	70.9854	0.544899	0.614413	0.698078	0.702162	0.702428	0.702429	0.702427	0.763244	0.747373	0.747386	0.788944	66.2988	66.2988
11477	Acvr1	2.38765	2.37458	2.05079	2.60948	2.47057	2.49874	3.15919	2.85714	4.1492	2.95456	2.39224	2.35246	0.696456	0.648499	0.692505	0.681968	0.617268	0.566816	0.938169	0.80403	0.869012	0.865534	0.768228	0.580114	7.58557	7.58557	7.58557	7.58557	7.58546	7.45466	7.12899	6.6637	5.65647	5.65637	5.65637	0.395987	0.395987	0.395987	0.395987	0.395938	0.371167	0.364379	0.324831	0.295277	0.295277	0.295277	18.6686	18.6686
114774	Pawr	2.81134	2.39649	2.94401	2.51732	2.7204	2.68406	6.46504	5.87686	5.61154	5.10323	4.07263	4.4303	0.724206	0.706366	0.756678	0.696302	0.77532	0.683424	1.15662	1.29868	1.15182	1.06256	1.3523	1.17826	22.7028	22.7028	22.7028	22.7028	22.7028	22.7028	22.7028	22.3429	20.8518	19.4062	18.4209	0.463803	0.463803	0.463803	0.463803	0.463803	0.463803	0.463803	0.434501	0.424902	0.380401	0.375543	20.0017	20.0017
11481	Acvr2b	2.96397	2.44875	2.9172	3.40645	2.95407	2.5594	0.745152	0.943702	0.90113	1.23038	0.946847	0.883302	0.129931	0.150021	0.178912	0.188505	0.226204	0.143491	0.295737	0.174932	0.129405	0.227776	0.168532	0.104048	1.05745	1.05505	1.05208	1.04945	1.08871	1.27515	1.37005	1.3309	1.13706	1.13549	1.13548	0.0830681	0.0820516	0.0820109	0.08201	0.0820099	0.0820074	0.0819647	0.0677876	0.0633975	0.0633941	0.0633941	2.00711	1.98159
11486	Ada	0.542351	0.568713	0.55752	0.32818	0.387858	0.288099	0.981403	0.686545	0.973906	1.07191	0.292402	1.12832	0.187225	0.168211	0.150566	0.158777	0.170299	0.160528	0.410495	0.21842	0.319057	0.213019	0.203553	0.300945	7.83481	7.78829	7.72044	7.65941	7.51494	7.41463	7.34497	7.22129	6.88754	5.96882	5.68269	0.151507	0.139562	0.139009	0.13898	0.138976	0.138975	0.138974	0.138821	0.127538	0.111494	0.109232	5.71649	5.25379
11489	Adam12	1.91923	1.69213	1.86058	1.69329	1.30865	1.58058	1.19171	2.48662	1.73662	1.3122	0.695927	0.312792	0.376033	0.64848	0.553111	0.466527	0.424211	0.339031	0.565504	0.563931	0.441974	0.543546	0.828599	0.393366	16.922	16.922	16.922	16.922	16.9193	16.7822	16.2734	15.5684	15.4487	13.6912	11.3048	0.414816	0.414816	0.414816	0.414815	0.414293	0.405546	0.40262	0.348462	0.229691	0.193516	0.166546	23.4546	23.4546
11490	Adam15	2.01723	2.02458	1.84265	2.21734	1.95705	2.10887	4.0537	4.91361	4.84153	4.08856	5.67875	6.62614	0.604066	0.525289	0.404311	0.429601	0.716404	0.768351	2.14818	1.62189	1.27232	0.950821	1.24296	1.63082	9.98732	9.94589	9.91581	9.90567	10.1129	10.7981	11.2372	11.8701	13.6256	13.82	13.8261	0.277785	0.322084	0.361199	0.383363	0.481967	0.494549	0.496581	0.495206	0.551254	0.517564	0.476687	9.25485	9.25485
11492	Adam19	1.47502	1.2491	1.32127	1.81358	1.6314	1.65225	2.85121	3.18988	3.3219	2.54169	1.63597	2.46128	0.172412	0.189707	0.16628	0.141513	0.103824	0.0815556	0.12226	0.270823	0.304674	0.32623	0.386627	0.0391796	2.85057	2.82766	2.77678	2.72319	2.58965	2.4874	2.39624	2.04923	1.54462	1.28692	1.15169	0.161902	0.153503	0.148867	0.146203	0.140911	0.13615	0.13125	0.111932	0.0853046	0.0718653	0.0647347	5.96256	5.61363
11502	Adam9	3.74957	2.80483	3.02896	2.88509	2.93572	2.97133	4.46337	5.87301	5.21363	5.68202	4.64777	4.4332	0.574299	0.530649	0.517671	0.501422	0.363896	0.404485	1.07649	0.954914	0.910288	0.727275	0.732458	0.843242	47.9242	47.8448	47.6409	47.3805	46.4015	45.0856	43.4851	37.6832	34.1398	33.672	33.5752	0.460735	0.449276	0.44171	0.43653	0.420234	0.399716	0.379872	0.338961	0.325244	0.323216	0.322643	40.5505	39.4825
11515	Adcy9	0.861121	0.562741	0.964676	0.801091	0.613904	0.79525	1.52139	1.81881	1.4174	1.43125	1.59416	2.0742	0.0677057	0.0398774	0.0585637	0.0697951	0.104723	0.102326	0.184483	0.161949	0.193205	0.161613	0.0891109	0.243388	0.784965	0.763719	0.754592	0.785329	0.946264	1.05346	1.10449	1.14797	1.15412	1.1549	1.15513	0.0775709	0.0692666	0.0773589	0.0874759	0.104062	0.109476	0.111595	0.113626	0.114065	0.114132	0.114152	2.1243	1.91168
11520	Plin2	1.13167	1.29773	1.32419	1.16035	1.33687	1.08199	5.3908	4.10037	4.21304	3.51466	3.39401	3.58098	0.562041	0.513861	0.337086	0.335957	0.263763	0.230693	0.460352	0.497696	0.359909	0.276217	0.243536	0.228122	45.4371	45.3155	44.9322	44.3615	42.0831	39.4567	36.7714	28.0664	21.511	20.1402	19.7596	0.464966	0.440108	0.415601	0.3963	0.354961	0.322918	0.296661	0.238875	0.210189	0.203711	0.201379	30.951	29.1343
11529	Adh7	0.91501	1.03726	0.967608	0.931031	0.810394	1.15888	2.41854	1.89591	1.89979	1.47333	2.52895	1.63361	0.0790529	0.0891345	0.0758864	0.0785647	0.19678	0.110775	0.055041	0.213859	0.0391796	0.0391796	0.0934516	0.152319	3.44006	3.44001	3.43975	3.43908	3.43253	3.41475	3.38199	3.16936	3.39643	4.09158	4.54423	0.0834781	0.0834559	0.0834005	0.0833038	0.0826891	0.0815244	0.0798962	0.0745176	0.0869529	0.103313	0.112429	3.1112	3.11014
11532	Adh5	9.60246	9.77959	9.2266	10.3543	8.33136	10.5589	5.39495	7.02472	7.91623	8.91307	7.78314	7.26391	1.0875	1.02837	1.07016	1.31008	1.32494	1.38505	2.27121	2.18164	2.43849	2.49511	3.01189	2.73839	60.0549	60.0549	60.0086	59.9432	59.9768	60.0007	60.0173	60.366	72.0843	72.3172	72.3271	0.903056	0.903075	0.950426	1.02778	1.02862	1.02862	1.02862	1.04492	1.13245	1.13116	1.13116	43.8311	43.8311
11538	Adnp	1.34221	1.75651	2.02207	1.98117	2.32596	1.88329	8.41926	8.61556	10.1905	9.98759	8.74064	9.82939	1.56268	1.39766	1.57363	1.66818	1.47977	1.51851	3.01589	3.22614	3.38422	3.51433	3.42645	2.91385	14.7602	14.3851	14.005	13.7376	13.3183	12.4861	12.0967	11.8929	11.8899	11.8899	11.8899	0.882836	0.784393	0.783879	0.783878	0.778134	0.711164	0.711158	0.711159	0.711158	0.711158	0.711158	31.251	27.748
11545	Parp1	5.32603	4.78278	5.03538	4.88759	4.69428	4.13798	5.25865	6.97571	8.06898	7.81672	6.49571	8.43355	0.402711	0.580626	0.779265	0.712065	0.818296	0.847402	0.534673	0.68847	1.12881	1.07189	1.27454	0.973025	59.2508	59.2323	59.0627	58.9714	59.0363	59.099	59.1461	62.2287	79.1082	80.2406	82.2632	0.673558	0.692573	0.872521	0.992546	1.01468	1.01452	1.01138	0.984505	0.972255	0.972113	1.03344	40.8734	40.8734
11546	Parp2	3.07698	2.2592	2.19643	1.74331	2.13725	1.92953	5.97126	6.54609	4.63304	7.12819	5.12231	6.61687	0.515127	0.408344	0.367965	0.412006	0.515354	0.471161	0.661201	0.410033	0.546424	0.339988	0.762591	0.685743	13.1533	13.0654	12.8298	12.5441	11.7626	11.2674	11.0207	11.1404	12.1302	12.8608	13.3711	0.558627	0.521452	0.4948	0.479196	0.460045	0.456676	0.458783	0.480324	0.521881	0.550835	0.571174	18.2251	16.8025
11550	Adra1d	1.20864	0.638597	0.73084	0.716573	0.93405	0.747077	1.29582	0.329129	0.45001	0.223884	0.652336	0.792358	0.371103	0.212369	0.194221	0.0782103	0.240832	0.163901	0.733687	0.318212	0.49556	0.232102	0.465683	0.393157	1.00207	1.001	0.979421	0.917693	0.769824	0.713051	0.69237	0.680564	0.634623	0.52358	0.509063	0.0869515	0.0856955	0.0732792	0.062052	0.0590874	0.0590549	0.059054	0.0590181	0.0536035	0.0449983	0.0441374	2.02935	1.97274
11564	Adsl	4.59692	5.372	5.48633	6.37984	5.38247	5.70768	5.95194	8.61341	9.337	8.92316	8.72303	8.14626	0.927932	1.31366	1.48799	1.40669	1.75665	1.90657	1.63058	2.39967	2.75524	2.80087	3.41384	4.02021	57.8348	57.8722	57.9672	58.1383	59.4905	61.5036	63.8552	73.3644	83.3227	86.6975	88.0837	1.03607	1.06098	1.15548	1.29904	1.46274	1.53442	1.59201	1.54131	1.52577	1.56615	1.58542	52.5637	53.3517
11593	Aga	0.837036	0.687599	0.687299	0.614377	0.560565	0.770303	5.86468	5.5254	4.83142	4.70794	6.75175	5.41666	0.398056	0.307602	0.203183	0.283204	0.261148	0.328137	0.287808	0.270509	0.143513	0.171033	0.254575	0.353418	8.54884	8.54724	8.37587	8.17201	7.72119	7.4409	7.26665	7.02306	7.13772	8.07334	8.0988	0.288116	0.28325	0.235973	0.235259	0.235253	0.235252	0.235252	0.235252	0.256343	0.272968	0.272969	8.12659	7.62606
11600	Angpt1	4.08269	4.8119	4.69385	5.02379	4.48576	5.45502	3.12733	1.48907	1.92509	2.13223	3.31533	2.49301	0.209398	0.14539	0.134756	0.214775	0.142742	0.163331	0.147698	0.190066	0.236523	0.458974	0.137144	0.263051	7.50859	7.50859	7.50858	7.50856	7.4448	7.13673	6.93319	6.67918	6.64592	6.67102	8.33879	0.244222	0.244222	0.244222	0.244207	0.226318	0.216229	0.216149	0.216147	0.216151	0.217972	0.310695	8.04303	8.04303
11605	Gla	1.51	1.12722	1.11798	1.05585	1.14848	1.15801	1.74422	2.36835	2.68202	1.64057	1.93301	1.48974	1.46005	1.24371	1.21388	1.09333	1.50117	1.60059	5.09724	5.24317	4.45967	4.75301	4.66741	5.0895	6.61645	6.62317	6.63996	6.65935	6.66403	6.57113	6.31508	5.37223	5.0885	5.05536	5.03462	0.187996	0.187354	0.185915	0.183797	0.177079	0.125601	0.12508	0.155053	0.180396	0.185172	0.186678	13.4933	13.441
11610	Agtrap	1.22998	0.7251	0.994783	0.849106	0.790033	0.862544	2.17354	1.25387	1.19909	0.655416	1.34035	2.05243	0.321519	0.18627	0.142962	0.120603	0.273236	0.138248	0.853188	0.730871	0.484191	0.417791	0.718721	0.639312	1.16113	1.15976	1.14437	1.15186	1.174	1.13701	1.13197	1.0296	0.836122	0.833744	0.833683	0.122366	0.11958	0.104835	0.0665378	0.0466005	0.0872024	0.0972898	0.0981047	0.0981053	0.0981053	0.0981053	2.02669	1.92189
11622	Ahr	1.83995	1.82136	1.69845	1.67022	1.62651	1.59386	4.21956	4.66226	3.73458	4.78984	4.26853	4.6472	1.01766	1.06944	0.932836	0.911792	1.13147	1.0303	1.56593	1.64104	1.39699	1.26304	1.87736	1.64232	7.37644	7.37644	7.37644	7.37644	7.37644	7.37634	7.37438	6.56935	5.54324	5.07007	5.06121	0.755772	0.755772	0.755772	0.755772	0.755771	0.755731	0.75503	0.645478	0.550523	0.519037	0.518548	15.7044	15.7044
11630	Aim1	1.96977	1.08273	1.35248	1.31435	1.19514	1.06707	2.00338	1.61468	1.40949	1.50188	0.837472	1.70314	0.2414	0.201803	0.220599	0.16438	0.187025	0.179551	0.363507	0.306079	0.388324	0.397154	0.308359	0.334165	5.57793	5.60094	5.62293	5.62419	5.48901	5.2055	4.85603	3.61337	2.62658	2.32931	2.195	0.148945	0.139975	0.131923	0.125681	0.113089	0.105325	0.0999968	0.0888224	0.0809241	0.0778052	0.0761472	6.04664	5.62712
11639	Ak4	2.29806	2.41543	2.98398	3.09147	2.84619	3.14874	3.13763	3.80006	4.03943	3.70084	3.49191	3.96376	0.254777	0.447457	0.549481	0.603655	0.672084	0.73891	0.413406	0.579274	0.676298	0.810859	1.37389	1.09638	11.7835	11.7859	11.8235	12.366	15.1032	17.0857	18.4473	20.5763	21.069	21.0886	21.0894	0.201938	0.20359	0.289578	0.395939	0.450211	0.450782	0.414446	0.34923	0.34923	0.34923	0.34923	9.49342	9.60225
11640	Akap1	6.2622	5.32525	5.62096	5.61763	5.19402	5.4036	8.52849	12.0435	11.301	11.9022	10.9676	11.0785	0.580595	0.968196	1.02457	0.98668	1.04821	0.9932	0.848708	0.94701	1.4686	1.60004	1.65618	1.61587	32.2289	32.1451	32.0835	32.6553	37.0016	38.6456	39.5604	40.9129	41.2044	41.2141	41.2145	0.695761	0.783206	0.935085	1.1543	1.20737	1.10572	1.07768	1.07668	1.07668	1.07668	1.07668	27.4066	27.4434
11641	Akap2	0.96403	0.916069	0.534231	0.520206	0.579005	0.687265	1.13893	0.94625	1.39713	1.37267	1.32078	1.0551	0.801384	0.715968	0.829138	0.8313	0.769557	0.712373	1.46435	1.2313	1.79768	1.61875	1.19122	1.33939	14.7781	14.7781	14.7781	14.7781	14.7571	14.1855	13.4772	12.8587	11.5604	9.54327	9.49866	0.19597	0.19597	0.19597	0.195967	0.193806	0.173217	0.170287	0.170141	0.143775	0.12614	0.125954	23.325	23.325
11655	Alas1	1.34261	0.953618	1.10908	0.729357	0.785053	0.839289	12.032	9.90125	8.95286	7.71279	11.3386	10.9876	0.475275	0.34742	0.284626	0.314657	0.501619	0.607473	0.860938	0.645736	0.597625	0.344372	0.684365	0.661887	8.63693	8.62617	8.5813	8.50425	8.17528	7.86857	7.70473	8.12822	10.0271	11.0916	11.5851	0.322573	0.315223	0.30438	0.294699	0.289513	0.317576	0.333876	0.348719	0.360152	0.387414	0.400631	7.44553	7.21298
11658	Alcam	2.70992	2.43644	2.06695	2.06827	2.35253	2.23852	4.68168	4.16879	5.92547	6.85002	3.41116	4.28057	0.573026	0.689763	0.622934	0.678303	0.411097	0.422917	0.910952	1.19503	1.05675	1.13454	0.71695	0.932634	47.6414	47.6155	47.5454	47.4541	47.1117	46.6967	46.2225	43.921	38.9623	34.9745	32.1009	1.19886	1.18606	1.17761	1.17171	1.1566	1.14129	1.12522	1.05786	0.937002	0.848013	0.784953	31.6525	31.2474
11670	Aldh3a1	1.97674	2.17124	1.69524	2.17733	1.86165	2.15241	0.0802378	0.0802378	0.252442	0.0802378	0.246335	0.0802378	0.00480178	0.00480178	0.0648568	0.00480178	0.00480178	0.00480178	0.0391796	0.0391796	0.0391796	0.0391796	0.0510575	0.0391796	1.26483	1.25731	1.238	1.21787	1.16599	1.12613	1.0956	1.03101	1.06339	1.3951	1.71747	0.0124375	0.0105748	0.00990745	0.00981568	0.00979207	0.00979127	0.00979187	0.00982768	0.0112359	0.01562	0.0178537	0.674864	0.564746
116701	Fgfrl1	1.85134	1.28759	1.42611	0.957838	1.34028	0.919592	2.04909	2.19031	1.70632	1.30182	1.25955	1.18563	0.332586	0.306583	0.420241	0.275558	0.298374	0.211016	0.972516	0.744595	0.611287	0.45836	0.478042	0.467805	7.66697	7.66697	7.66697	7.66691	7.60727	7.2019	6.87264	5.48622	3.49102	3.45375	3.45319	0.707916	0.707916	0.707913	0.707812	0.659182	0.592912	0.589939	0.378885	0.31886	0.318844	0.318843	8.07267	8.07267
11671	Aldh3a2	2.03074	1.45058	1.42971	1.2842	1.37653	1.0734	6.33955	6.93409	6.55534	6.3013	6.49296	7.2075	0.225533	0.240349	0.19356	0.111113	0.167532	0.152542	0.415608	0.5737	0.443648	0.320226	0.463943	0.454014	5.97058	5.97063	5.99151	5.994	5.98574	5.85112	5.46473	4.83914	4.70384	4.69983	4.9326	0.169051	0.169008	0.147199	0.141322	0.141242	0.133571	0.131884	0.131866	0.131866	0.13191	0.147971	5.07295	5.07295
11674	Aldoa	2.2541	2.51448	2.87545	3.0639	2.94487	3.26064	5.34986	5.1872	5.36156	5.23682	3.2892	4.18418	6.68564	6.02236	5.23286	5.75808	5.75853	5.91541	5.32753	4.69146	4.44103	4.87135	5.14675	4.98135	506.829	506.749	499.097	444.915	409.687	394.549	382.119	356.736	341.411	338.656	338.161	2.13227	2.13227	2.13227	2.13227	2.132	1.73786	1.95661	1.9567	1.9567	1.9567	1.9567	158.042	158.042
116748	Lsm10	1.45973	1.61502	1.90561	1.81601	1.78538	1.96736	5.15997	6.12943	6.17014	6.17761	3.90222	5.23688	2.10455	1.54906	2.709	2.80116	0.802563	1.83497	0.87622	0.954009	1.11719	1.14821	0.8467	1.19466	6.3763	6.3729	6.26321	6.11519	6.10472	6.1322	5.81254	6.98795	7.31044	7.32541	7.32612	0.404053	0.407527	0.522486	0.695606	0.8178	0.731578	0.634342	0.573509	0.572434	0.572433	0.572434	4.88414	4.88414
116871	Mta3	0.880282	0.583645	0.519152	0.553004	0.492866	0.86713	1.81368	1.05417	1.26368	1.20151	1.52833	0.752319	0.240052	0.209135	0.218329	0.173742	0.251003	0.180257	0.399182	0.266786	0.380143	0.238625	0.414396	0.213712	2.83783	2.83739	2.83422	2.82407	2.72062	2.57282	2.46937	2.33129	2.00304	1.76388	1.69559	0.0860688	0.0859263	0.085366	0.0840838	0.0774439	0.0735767	0.0722462	0.0699167	0.0591783	0.0529717	0.0512827	5.05183	5.04169
116891	Derl2	3.68029	3.40403	2.99485	3.12217	3.16577	2.90586	6.20146	7.45766	6.86884	7.06932	5.19895	4.97048	0.617246	0.46466	0.456665	0.508718	0.422853	0.473893	2.25004	2.33576	2.65422	2.60655	2.24998	2.34475	12.3261	12.3171	12.2243	12.0224	11.3703	10.9252	10.6406	10.2233	10.1561	10.3283	11.1549	1.13071	1.10981	1.02491	0.962576	0.931219	0.93032	0.930263	0.930283	0.93255	0.957532	1.05627	11.1177	10.5719
116914	Slc19a2	2.13812	2.56389	2.16577	2.86803	2.24822	2.4049	2.93367	2.89068	3.42514	2.68212	2.20372	3.06795	0.174682	0.247899	0.260175	0.261365	0.294417	0.254394	0.228775	0.31651	0.392539	0.295575	0.451998	0.429748	7.10376	7.05597	7.13531	7.35837	9.58466	10.2654	10.1987	10.1095	10.99	11.403	11.457	0.169867	0.233631	0.272026	0.305722	0.322412	0.32302	0.323143	0.327169	0.284053	0.288548	0.288949	5.48526	5.73528
11692	Gfer	2.39968	2.43225	2.45318	2.54295	2.59431	2.91745	6.13836	6.26137	6.15625	6.70582	6.51088	7.52472	0.96592	1.86044	1.3255	1.47964	1.45919	1.91767	1.06543	1.14989	1.45382	1.4739	1.86362	1.89347	23.6816	23.6816	23.6816	23.6816	23.6816	23.6816	23.6816	24.1883	33.5547	33.0309	32.9154	1.92501	1.92501	1.92501	1.92501	1.92501	1.92501	1.92495	2.17426	2.42498	2.0381	1.9851	17.616	17.616
116940	Tgs1	3.39987	4.62519	4.71615	5.16207	4.8415	4.29802	7.85737	8.69317	8.6011	10.3344	8.7696	9.36477	0.598761	0.747102	0.853035	0.96317	0.942343	0.959914	1.01222	1.24985	1.27531	1.4456	1.57876	1.3678	12.3485	12.3486	12.4645	13.2575	14.6424	15.0259	15.1317	15.1717	15.1725	15.3505	15.3906	1.05176	1.05197	1.15964	1.28859	1.29225	1.29225	1.29225	1.29225	1.29234	1.30907	1.31088	31.8013	31.8179
117109	Pop5	1.9326	1.70947	1.38786	1.25039	1.4114	1.2984	0.4596	0.646921	0.483337	0.418473	0.256314	0.49329	2.761	2.69354	2.84611	2.55521	2.96815	3.02734	0.933615	0.642437	0.887336	0.972454	0.923391	1.11863	17.3268	17.3457	17.3375	17.4913	17.9915	18.4504	18.9513	22.505	27.8515	28.9194	29.116	0.374103	0.389629	0.518239	0.532126	0.544079	0.556281	0.577258	0.582297	0.568812	0.578019	0.580043	13.7223	14.1896
117146	Ube3b	1.57729	1.2332	1.22686	1.75425	1.56899	1.48129	11.194	10.4512	10.5269	10.7131	8.79196	9.20003	1.07253	0.896206	0.957523	0.739874	0.996191	0.968878	1.96749	1.93317	2.07452	1.21047	1.95946	2.26649	16.581	16.581	16.5802	16.5369	15.8467	15.3987	15.1553	14.9205	14.876	13.3914	12.9661	0.734142	0.734139	0.733246	0.704907	0.659694	0.672642	0.694797	0.694813	0.692188	0.699812	0.692021	20.4301	20.4299
117150	Pip4k2c	1.75173	1.05218	1.01002	0.921086	1.17661	0.977592	6.1914	4.13581	4.23701	4.69895	4.35498	4.52993	1.38073	1.01524	0.948004	0.726869	0.999804	0.989436	3.55352	2.19391	1.93988	1.49426	1.91727	1.96835	6.38658	6.37063	6.28098	6.1381	5.80463	5.49938	5.3101	5.09378	5.13587	5.36925	5.8525	0.42632	0.412781	0.380498	0.348086	0.308356	0.301283	0.299527	0.298934	0.30393	0.32027	0.351672	9.19894	8.75576
117160	Ttyh2	3.12802	3.18846	2.97032	3.44811	2.90644	3.22178	8.15463	7.9012	11.312	11.5741	8.84598	9.37968	0.466212	0.559168	0.598674	0.626826	0.530229	0.511787	1.0739	1.22871	0.985752	1.2392	1.32343	1.11435	15.493	15.4908	15.4571	15.5101	16.0374	16.423	16.7205	17.1249	16.3737	13.0306	12.7034	0.352592	0.35479	0.396464	0.448427	0.465734	0.459833	0.410857	0.35311	0.309368	0.260677	0.260206	12.1225	12.1237
11736	Ankfy1	2.8185	2.05409	2.16311	1.87616	1.94659	2.06548	9.66882	9.29639	8.78123	8.66654	8.59289	8.0124	0.554883	0.502349	0.478374	0.459806	0.416727	0.447306	1.20113	1.09464	1.02584	0.991891	0.82253	0.878049	11.967	11.9618	11.9225	11.8071	11.2713	10.8106	10.4946	10.102	10.0852	10.2201	10.5819	0.518142	0.514838	0.501942	0.47854	0.424467	0.412112	0.409322	0.408053	0.409533	0.416425	0.43338	15.5053	15.3633
11737	Anp32a	4.77584	4.94966	5.22052	5.28556	4.95378	4.89694	6.36001	5.68902	5.81619	5.31284	5.14783	6.71046	1.39845	1.31354	1.28983	1.07535	1.14712	1.26051	1.33651	1.12244	1.34318	1.15358	1.39882	1.718	42.184	42.1806	42.1465	42.1253	42.1494	42.1663	42.1777	43.2276	49.65	50.2974	54.097	0.248823	0.252391	0.290273	0.322975	0.330231	0.330266	0.329911	0.293152	0.279971	0.283714	0.31046	55.6928	55.6928
11740	Slc25a5	4.72639	4.10727	3.96659	4.17407	3.97137	4.00857	12.5836	14.9185	16.3963	17.3927	18.0383	15.7224	3.35766	4.44717	4.66681	4.47173	4.06089	4.45433	2.01574	3.05159	3.16272	3.8833	3.32662	3.27652	434.578	434.047	433.876	433.911	434.084	434.217	434.315	435.398	486.017	491.067	506.657	2.73045	3.28689	3.52704	3.56411	3.57409	3.57443	3.57421	3.63615	3.58349	3.02778	3.12986	274.478	274.478
11744	Anxa11	1.13377	0.948038	0.847928	0.779411	0.928592	0.745464	2.63531	3.1473	2.65485	2.16189	1.82332	2.24075	0.0905765	0.107452	0.0976848	0.0956176	0.0968491	0.0620455	0.0391796	0.0391796	0.0391796	0.0391796	0.0391796	0.0391796	1.41241	1.41241	1.41241	1.41241	1.42396	1.5001	1.38351	1.19258	1.16739	1.16704	1.16704	0.0671255	0.0671255	0.0671256	0.0671306	0.0731458	0.0650639	0.0558291	0.055464	0.0554642	0.0554642	0.0554642	1.51512	1.51512
11745	Anxa3	1.09858	0.830549	1.08909	0.762713	1.01834	0.767349	6.96132	6.94938	8.56534	7.75495	3.54675	3.72558	1.50345	1.93789	1.94604	1.93592	0.903709	0.952157	2.13894	2.69685	2.68475	2.61209	1.18253	1.5629	155.871	155.768	155.272	154.21	148.054	140.5	133.857	118.352	100.237	83.8843	74.0761	2.09128	2.0625	2.00305	1.9253	1.72426	1.62983	1.58671	1.4981	1.26429	1.06755	0.963738	119.201	117.287
11747	Anxa5	4.01976	3.17048	3.06157	2.88777	3.33613	3.16741	15.2519	13.7348	16.8258	17.7896	9.66844	8.93607	1.75235	2.28121	2.81868	3.05129	1.30268	1.02523	2.06353	2.71855	2.99362	3.53416	1.6762	1.31661	185.446	185.446	185.446	185.446	185.446	182.314	176.09	164.053	139.63	118.917	117.511	1.5013	1.5013	1.5013	1.5013	1.50123	1.29639	1.06719	1.03604	0.742091	0.63805	0.63805	125.16	125.16
11749	Anxa6	2.62352	2.07886	1.91888	1.53416	2.08327	1.55072	6.9907	5.72465	5.69283	5.94364	3.06969	3.17605	0.980366	0.802878	0.960681	0.685051	0.342628	0.327185	1.76071	1.67569	2.10654	1.84427	0.676472	0.7923	78.9129	78.8616	78.621	78.0961	74.7995	70.2615	65.8758	53.371	36.7401	27.2759	23.3905	0.551565	0.541634	0.518334	0.480321	0.330816	0.250222	0.22217	0.185913	0.146228	0.152909	0.163661	51.3815	50.4917
11757	Prdx3	6.0574	4.93859	4.96417	4.86555	5.21697	4.68577	6.6341	12.8271	11.4076	11.1512	10.1826	10.7222	0.659552	1.10595	1.05574	1.08908	1.21787	1.44642	3.41289	2.72105	2.73742	2.73045	2.91901	3.19752	118.801	118.747	118.803	118.95	119.76	120.923	122.293	128.512	140.132	149.402	156.897	0.870875	0.970737	1.03997	1.08457	1.14901	1.17104	1.17797	1.17121	1.16122	1.17127	1.1891	64.4999	65
117599	Helb	1.41299	1.1995	1.19475	0.962449	0.947075	1.01135	2.53271	2.75691	2.0072	2.12866	1.7332	2.18413	0.130645	0.112212	0.0749088	0.0585802	0.119781	0.0885729	0.197315	0.266904	0.11193	0.0810396	0.115753	0.230651	3.66447	3.64657	3.57122	3.45464	3.0972	2.85437	2.70891	2.5377	2.60298	2.86023	3.28704	0.132471	0.12323	0.109819	0.100933	0.0927176	0.0913285	0.0909813	0.0912055	0.0953655	0.106196	0.122611	4.18685	3.81232
117606	Boc	2.21247	2.61369	2.33237	2.92675	2.73585	2.97683	4.89894	6.59808	5.95244	6.07086	6.0906	6.91612	0.300008	0.211614	0.255295	0.191113	0.376433	0.308818	0.637191	0.316197	0.354076	0.447562	0.590252	0.35725	2.16045	2.16503	2.20033	2.28284	2.56636	2.7271	2.80339	2.85298	2.64699	2.48472	2.44969	0.0986827	0.10135	0.111012	0.121484	0.130167	0.130896	0.130979	0.129957	0.118961	0.11298	0.111789	3.4024	3.53042
11781	Ap4m1	11.1042	9.74192	8.43737	8.79673	8.43031	8.30087	9.38885	8.78186	8.15076	7.6984	7.16243	7.11461	1.27712	1.19679	1.02116	0.842393	1.20753	0.923617	2.56896	2.18372	1.91758	1.77476	1.93032	1.84283	10.9228	10.9227	10.9201	10.9041	10.3981	9.27989	8.58633	8.11899	8.1436	8.50918	9.81399	1.33346	1.33325	1.33105	1.32048	1.1526	1.02217	0.996889	0.990138	0.995706	1.04965	1.223	23.3742	23.3665
11782	Ap4s1	4.14122	4.45608	4.84938	5.19819	4.201	4.57718	6.92067	5.78545	4.64349	6.23505	5.64623	6.68387	0.417641	0.381465	0.371192	0.415081	0.345085	0.428477	1.37739	1.56871	1.37345	1.27349	1.3743	1.42102	5.11584	4.946	4.71114	4.55134	4.48429	4.68586	4.93213	5.62895	6.12612	6.29758	6.38114	0.148191	0.148191	0.148191	0.148191	0.148191	0.148191	0.148191	0.148191	0.148191	0.148191	0.148191	9.36953	9.36953
11783	Apaf1	2.39349	1.98083	2.18108	2.3673	2.00791	2.15331	5.98121	4.97843	4.34395	3.9589	4.34376	4.37731	0.272445	0.201381	0.190695	0.136727	0.112463	0.132173	0.406648	0.344845	0.389991	0.357093	0.194467	0.264171	5.24717	5.22571	5.19096	5.1286	4.67086	4.19912	3.887	3.00143	2.85865	3.07707	3.29697	0.172487	0.166563	0.157185	0.146173	0.105115	0.102404	0.09857	0.0956488	0.100339	0.108107	0.11566	9.91348	9.52356
11787	Apbb2	4.21128	4.22903	3.83498	3.61904	4.37381	4.10757	7.91109	7.97495	8.70953	8.08515	8.05903	8.34233	1.2674	0.996149	1.13341	1.21402	1.35234	1.15577	2.51336	1.62845	2.07568	2.25591	2.34383	1.74669	22.7756	22.7756	22.7755	22.7741	22.6666	22.1114	21.5623	20.9727	19.5562	17.7856	17.5822	0.821109	0.821105	0.821043	0.820618	0.802122	0.765784	0.757179	0.754336	0.687259	0.637928	0.633573	34.2532	34.253
11789	Apc	1.62149	1.48449	1.58473	1.73863	1.61534	1.61291	8.39198	7.73466	6.51497	6.64368	5.98391	7.73319	0.307814	0.332472	0.326681	0.323226	0.393959	0.416492	0.480492	0.659015	0.665182	0.571826	1.07338	0.91778	8.0859	8.08559	8.06622	8.09056	8.52399	8.77864	8.91281	9.35205	10.3195	10.3266	10.3267	0.363124	0.363434	0.385001	0.41593	0.441828	0.441832	0.441828	0.439521	0.437902	0.437902	0.437902	10.3637	10.3638
11796	Birc3	0.829265	0.711879	0.533059	0.705412	0.761304	0.668517	2.87015	1.68317	2.21833	2.35821	1.58071	1.52307	0.189885	0.139994	0.148085	0.178563	0.156066	0.153246	0.300022	0.34525	0.217298	0.311071	0.311495	0.282185	1.75359	1.75252	1.7326	1.67198	1.51222	1.45031	1.42818	1.41304	1.14997	0.979722	0.968238	0.187845	0.186365	0.172458	0.157245	0.151766	0.151686	0.151678	0.15103	0.117891	0.10452	0.103684	3.62936	3.57
11797	Birc2	3.1415	3.6089	3.67209	3.51669	3.29386	3.36067	0.548441	0.776734	0.135745	0.0974668	0.347721	0.520186	0.376707	0.277194	0.243587	0.216241	0.352641	0.3423	0.718998	0.543926	0.508502	0.424648	0.599238	0.583333	11.6254	11.593	11.2777	10.6864	9.26991	8.56608	8.22928	7.98647	8.76685	8.92745	8.93769	0.628787	0.601698	0.497302	0.443817	0.428788	0.428439	0.428475	0.434063	0.47855	0.483119	0.48344	17.1842	16.0021
11820	App	2.51272	1.99497	2.19917	2.6953	2.37681	2.33703	5.15164	4.77286	5.1103	4.08099	3.60982	4.48072	0.440278	0.514668	0.461869	0.41901	0.395572	0.379944	0.469188	0.818955	0.844148	0.915777	0.914571	0.648213	48.7233	48.7233	48.7233	48.7233	48.5647	44.9295	42.6782	40.2906	38.0384	30.754	30.6844	0.32239	0.32239	0.32239	0.32239	0.303872	0.265174	0.265169	0.265169	0.227559	0.203027	0.203027	60.7402	60.7402
11826	Aqp1	1.04908	0.849899	0.894128	1.31351	1.0487	0.98868	5.30859	3.0634	3.59029	3.74048	4.56545	2.81937	0.826949	0.621611	0.600021	0.840809	0.496681	0.601757	0.718277	0.382146	0.394411	0.587992	0.406345	0.404358	65.4956	65.1393	64.693	64.2875	63.2815	62.5281	61.9641	60.8113	59.8124	49.6585	48.1797	0.892349	0.821509	0.821327	0.821327	0.821327	0.821327	0.821327	0.821327	0.780547	0.654241	0.654217	37.8987	34.8824
11830	Aqp5	2.54569	1.83638	1.90028	2.29436	2.16456	2.57123	0.0802378	0.0802378	0.0802378	0.0966302	0.0802378	0.0802378	2.02888	0.820328	1.11954	0.698484	1.47824	1.1385	1.19222	0.551945	0.517567	0.494606	0.774099	0.505843	6.47241	6.46603	6.42926	6.355	6.01825	5.69897	5.46614	5.09976	5.09185	5.24523	5.46584	1.13612	1.1142	1.06452	1.01259	0.922319	0.895261	0.886849	0.883258	0.898759	0.929914	0.9708	5.98803	5.62959
11834	Aqr	1.48802	1.84944	2.22746	2.74397	1.96949	2.22457	6.91454	9.08583	9.34023	9.2145	8.49709	10.5494	0.43675	0.488009	0.502064	0.598442	0.630072	0.66031	0.601154	0.57747	0.479909	0.465881	0.780423	0.899408	9.5922	9.55139	9.41206	9.29619	9.54083	9.95417	10.3889	11.728	14.072	14.1069	14.1124	0.435561	0.435668	0.453065	0.511521	0.540187	0.540363	0.540459	0.590844	0.586063	0.586094	0.586096	15.8337	15.8406
11837	Rplp0	8.37287	6.39067	6.27708	7.20431	6.21442	6.62117	29.2302	24.4169	21.4565	26.9766	26.5188	29.0716	8.39929	8.56844	7.62654	8.76755	9.32256	9.62203	9.87373	9.08215	7.92136	9.42582	9.69865	9.57059	2596.38	2596.36	2574.54	2388.67	2357.05	2340.82	2292.06	2233.16	2204	2200.16	2199.65	9.76948	9.76948	9.76948	9.76948	8.74589	8.73223	9.79766	9.79766	9.79766	9.79766	9.79766	1210.91	1210.91
11838	Arc	4.84925	4.40827	4.38983	4.74318	4.7042	4.85624	26.8854	26.4237	24.265	31.7957	27.9891	25.2058	3.65533	3.76982	5.27305	4.90639	3.41175	2.46456	1.49201	1.57244	2.34532	2.18888	1.37651	0.741713	12.0408	12.1326	12.4345	12.8468	13.7804	13.6729	12.8709	9.3247	7.23777	6.8798	6.76872	0.330917	0.364076	0.397818	0.41636	0.399231	0.348719	0.305485	0.226209	0.194657	0.187992	0.1856	13.3829	14.9574
11841	Arf2	2.0429	1.89841	1.78007	1.9881	2.20031	1.82186	4.90293	5.29763	5.26566	3.52589	2.73757	3.77102	0.498378	0.530891	0.42872	0.420161	0.312817	0.356452	0.793256	0.781927	0.74401	0.624634	0.621371	0.405554	17.2792	17.2688	17.2087	17.0591	15.9783	14.5117	13.2741	11.1931	11.0075	11.4075	11.7438	0.487777	0.482946	0.469927	0.448703	0.374876	0.334485	0.318153	0.306216	0.312874	0.324733	0.333257	18.2245	17.9917
11845	Arf6	5.55764	5.09921	5.16908	4.82654	5.17411	4.93985	9.45077	8.09404	8.45934	9.43178	6.83257	6.74163	3.10057	3.70992	3.77966	3.98395	2.79868	2.30445	1.97861	2.18183	2.01544	2.43794	1.82249	1.71585	42.7152	42.7152	42.7152	42.7152	42.7152	41.6448	39.7193	36.9715	36.4784	33.5559	32.1761	1.2568	1.2568	1.2568	1.2568	1.25673	1.07509	1.07293	1.07293	1.07293	0.947376	0.945684	39.7746	39.7746
11853	Rhoc	3.65441	3.06171	3.0384	3.1067	3.60572	3.2838	9.35926	8.78657	9.30494	8.3632	5.28736	5.25703	4.5799	4.51294	4.96049	4.28456	4.01852	3.91428	2.59054	2.71236	2.45201	2.08627	1.92402	1.68769	84.6875	84.4577	83.8333	82.9909	79.9445	76.7858	73.8242	64.7035	54.9213	49.8683	46.7419	1.06622	1.00992	0.968749	0.939773	0.884378	0.848609	0.821174	0.745866	0.659665	0.609385	0.576343	55.678	52.4348
11855	Arhgap5	2.48905	2.58913	2.84575	3.34128	3.11664	3.2824	1.69318	1.48592	1.40752	2.06839	1.56713	2.0867	0.788025	0.640339	0.571846	0.578509	0.66774	0.718839	0.904745	0.601932	0.442786	0.588	0.543029	0.577357	26.8113	26.7918	26.7223	26.606	26.0497	25.3352	24.6082	22.5726	21.7371	22.1247	22.6665	0.736482	0.729501	0.720386	0.710865	0.683309	0.66013	0.641956	0.604797	0.597804	0.610933	0.625844	30.4036	30.0632
11858	Rnd2	3.99243	3.86939	4.05547	3.88043	3.96134	3.72384	4.13867	5.2467	5.14106	4.59157	3.29247	3.85578	1.16252	1.18757	1.5681	1.25718	1.39923	1.42435	0.153652	0.192383	0.219532	0.10903	0.197416	0.247584	1.574	1.58794	1.64381	1.72254	1.89259	1.93098	1.91984	1.85829	1.83921	1.83791	1.83766	0.0755437	0.0846843	0.0964781	0.102065	0.0981018	0.0929179	0.0905922	0.0885591	0.0882401	0.0882054	0.0881968	1.8706	2.1757
11863	Arnt	1.79759	2.09	1.59659	1.73138	1.63094	1.5622	5.36179	3.85467	4.21333	5.01714	3.54884	4.25429	0.631931	0.577398	0.515025	0.47195	0.483338	0.510037	1.2693	1.13206	1.48927	1.13228	1.25165	1.14602	4.78017	4.77773	4.74976	4.64178	4.07873	3.84801	3.7928	3.77727	3.79622	3.95174	4.40246	0.535328	0.53343	0.520352	0.48822	0.429741	0.423938	0.423187	0.423024	0.425584	0.444989	0.497627	16.2334	16.1449
11864	Arnt2	1.18744	1.08855	1.08458	1.42846	0.891353	1.0622	2.45697	1.72014	1.8712	1.7427	1.25346	1.56895	0.218466	0.219548	0.224336	0.225236	0.19855	0.128863	0.346091	0.23223	0.31966	0.301508	0.373121	0.270414	3.58585	3.58585	3.58585	3.58584	3.55428	3.31632	3.15744	2.80075	2.16143	2.1554	2.15535	0.167691	0.167691	0.167691	0.167685	0.154515	0.139197	0.139033	0.114545	0.100795	0.100794	0.100794	4.46809	4.46809
11865	Arntl	1.2798	1.03315	0.736028	0.760903	0.931353	0.731996	1.44188	1.82369	1.71352	1.66798	0.293803	0.734486	0.538599	0.606803	0.58642	0.515169	0.233044	0.18986	1.13813	1.03773	1.08471	0.848765	0.408486	0.4049	4.67612	4.70194	4.79597	4.9047	4.93951	4.62281	4.48667	1.14874	0.710004	0.704851	0.704054	0.224885	0.237531	0.250855	0.253069	0.216677	0.153646	0.108021	0.064091	0.0593684	0.0590597	0.0590031	7.51661	8.04398
11883	Arsa	1.51131	0.998629	1.16013	1.21672	1.24542	0.933453	1.47225	1.61021	1.3005	1.71916	1.14394	1.30691	2.68245	2.69154	2.36137	2.24694	2.16075	2.33228	0.0894053	0.0391796	0.0916482	0.0391796	0.148799	0.135414	3.47368	3.47368	3.47292	3.41969	3.16217	2.99491	2.88753	2.60943	1.91776	1.89598	1.89535	0.115982	0.115982	0.114729	0.0925214	0.0899806	0.0899806	0.0899805	0.0716214	0.0632828	0.0632828	0.0632828	3.07864	3.07862
11886	Asah1	2.88699	2.33619	1.96993	1.90118	1.90262	1.99524	7.19366	7.47833	5.8991	6.14227	7.1122	6.63759	0.607158	0.50986	0.500271	0.482717	0.549558	0.592059	2.01025	1.84541	1.82302	1.85028	1.83104	2.10576	37.5296	37.4648	37.2912	37.0527	36.1506	35.1664	34.2159	31.2855	28.5891	27.5455	27.0156	0.395508	0.382681	0.373086	0.365815	0.350447	0.339863	0.33184	0.312238	0.29524	0.287531	0.283137	25.1848	24.2997
11906	Zfhx3	3.90895	2.79806	3.09063	3.29498	3.15214	3.90474	5.52779	4.82153	4.23699	3.16318	2.69847	3.15133	0.846582	0.870258	0.884572	0.80832	0.645564	0.622079	1.52136	2.18526	1.88516	1.61101	1.73945	1.43991	2.46062	2.46062	2.46062	2.46062	2.3959	2.04306	2.01256	2.0112	1.69604	1.37164	1.37119	0.259367	0.259367	0.259367	0.259365	0.240192	0.212121	0.211996	0.211994	0.173015	0.14457	0.144534	15.8167	15.8167
11908	Atf1	3.20547	4.03984	3.74725	3.89132	3.82642	4.03551	5.52191	3.902	5.10917	4.5159	3.68843	5.8681	1.19189	1.40859	1.39326	1.48126	1.38466	1.33181	1.68006	2.01886	2.0383	1.90247	2.1789	1.89072	17.63	17.5388	17.5717	17.5936	17.6212	17.64	17.9414	19.4637	20.8056	21.1835	21.1855	0.829675	0.944152	0.946231	0.946232	0.946256	0.948738	0.989895	0.999272	0.949478	0.959182	0.959238	49.8795	49.8795
11909	Atf2	2.87427	2.6344	2.77613	3.14559	3.26706	2.7238	8.07994	8.62628	8.37123	8.6632	6.60101	7.98043	0.538376	0.443956	0.341599	0.395818	0.391591	0.48481	1.05803	1.10455	1.15261	0.927335	0.840866	1.09872	8.79851	8.78451	8.72015	8.59584	8.35784	8.27532	8.10399	7.8431	8.02188	8.53419	9.32847	0.576917	0.569791	0.555076	0.536417	0.489033	0.466895	0.457655	0.451231	0.464639	0.496405	0.543915	19.7417	19.4288
11910	Atf3	0.65499	0.451115	0.474977	0.581129	0.546378	0.478776	0.0802378	0.0802378	0.0896486	0.0802378	0.0802378	0.0802378	0.405897	0.378973	0.387967	0.403007	0.337957	0.332244	0.290368	0.580797	0.599869	0.558715	0.399701	0.374204	2.15265	2.1644	2.20043	2.23469	2.31122	2.3593	2.38948	2.43252	2.45413	2.72534	3.08188	0.0290135	0.0318032	0.0328314	0.0328859	0.0328917	0.0328918	0.0328918	0.0328932	0.0332973	0.0384704	0.0421716	2.00388	2.21456
11920	Atm	5.49305	5.94747	5.89191	5.92176	5.46861	5.12284	5.46322	6.48488	7.33527	5.74881	5.60536	5.84386	0.283726	0.315355	0.331933	0.40433	0.446854	0.491288	0.364181	0.271867	0.376868	0.480235	0.472957	0.633335	17.1718	16.9983	16.6785	16.4335	16.5747	17.1155	17.6606	19.2858	20.8115	22.6587	24.9435	0.449697	0.451138	0.460239	0.482586	0.528889	0.534503	0.535308	0.535827	0.545253	0.590214	0.639617	18.3864	18.4678
11931	Atp1b1	1.84064	1.40711	1.4831	1.51682	1.25856	1.16077	8.12131	5.50426	6.70467	6.83199	5.79722	6.52306	0.75613	0.680619	0.731772	0.807105	0.75168	0.71618	1.12344	1.02262	1.18276	1.00864	1.04468	0.931513	43.639	43.5593	42.9431	42.3253	41.0095	40.2385	39.7868	39.2227	37.4253	33.4736	33.2914	0.83373	0.793553	0.748797	0.747947	0.747923	0.747923	0.747923	0.747898	0.684143	0.636438	0.635963	46.6602	43.7086
11933	Atp1b3	2.67323	1.98384	2.23433	2.1273	2.30618	1.92187	4.01268	4.92122	4.91062	4.79538	4.12866	4.00125	0.848695	1.22581	1.20175	1.25284	1.06667	1.09284	1.39344	1.83898	2.19253	1.95219	2.00363	1.65948	91.1575	91.0044	90.1248	89.5199	91.5574	94.9375	95.973	97.9017	111.856	112.497	112.521	1.37933	1.33426	1.52358	1.55262	1.55378	1.55378	1.55378	1.57551	1.50144	1.50051	1.5005	84.6827	80.0838
11966	Atp6v1b2	1.89647	1.4297	1.4238	1.69503	1.32383	1.10609	7.45384	7.52315	6.78836	5.76093	6.82537	6.26529	0.333286	0.260376	0.251831	0.234019	0.281753	0.328281	0.79364	0.716269	0.506083	0.426588	0.443825	0.599788	16.9589	16.8962	16.6463	16.2875	15.2621	14.5537	14.0972	13.4458	13.606	14.6575	16.4191	0.312002	0.292146	0.267156	0.254499	0.246073	0.245077	0.244884	0.24539	0.253253	0.277203	0.311379	15.5807	14.4188
11972	Atp6v0d1	1.82687	1.03743	1.66799	1.03566	1.44841	1.30648	2.08935	1.63016	1.70666	2.18658	1.59977	0.923412	0.248598	0.238757	0.25764	0.261239	0.265949	0.165537	0.596124	0.334311	0.404582	0.327664	0.550767	0.333286	15.9399	15.9399	15.9399	15.9399	15.9399	15.8515	14.9703	13.3374	12.2786	12.2162	12.2131	0.175666	0.175666	0.175666	0.175666	0.175666	0.156163	0.141818	0.141081	0.134593	0.134593	0.134593	11.8597	11.8597
11974	Atp6v0e	2.42276	2.05525	2.03384	1.79224	2.22859	1.67501	3.99252	5.24606	5.55025	4.73008	3.55894	3.94133	0.319212	0.311158	0.29763	0.357997	0.19877	0.257763	0.423205	0.608611	0.617445	0.456437	0.318862	0.305636	14.4045	14.4015	14.3875	14.3569	14.1414	13.7816	13.3822	12.2996	11.9028	12.0647	12.4182	0.26428	0.263243	0.261121	0.258062	0.246064	0.235384	0.22832	0.218882	0.21852	0.222823	0.230256	11.9888	11.932
11975	Atp6v0a1	1.7879	1.40633	1.43901	1.22977	1.22817	0.933065	9.34797	7.65451	6.52658	7.58686	6.56201	7.57197	0.414721	0.315129	0.290817	0.223403	0.311405	0.312992	0.691609	0.671852	0.628728	0.670062	0.488032	0.449364	5.63309	5.63339	5.69524	5.78591	5.66911	5.26317	5.01081	4.29007	3.70101	3.69766	3.69764	0.258993	0.258982	0.252072	0.211684	0.175492	0.167356	0.167337	0.167338	0.167337	0.167337	0.167337	7.56148	7.56065
11983	Atpif1	6.111	4.31883	4.41108	4.76279	4.7429	4.58619	10.1929	8.73656	9.63024	8.84069	6.14467	8.3548	1.39827	1.23565	1.24806	1.43112	1.16787	1.45333	1.64499	1.68158	1.09228	1.03384	1.24339	1.15507	103.442	103.219	102.699	102.09	100.173	98.2513	96.3018	88.1773	75.2028	68.6234	65.4496	1.88425	1.81769	1.78559	1.76775	1.73095	1.69553	1.65788	1.50797	1.31277	1.22307	1.17857	77.2226	74.2106
11984	Atp6v0c	1.79753	1.52547	1.4394	1.72865	1.57593	1.59655	7.53861	7.11248	6.9191	7.19053	7.17866	6.66224	2.16149	2.13545	1.74574	1.95324	1.75171	1.52269	2.33915	2.82291	2.49729	2.46355	2.54902	2.54715	8.2294	8.2294	8.2294	8.2294	8.22938	7.95676	7.29205	7.20998	7.20836	7.20836	7.20836	0.861614	0.861614	0.861614	0.861614	0.861593	0.696189	0.752891	0.754712	0.754712	0.754712	0.754712	16.0683	16.0683
12009	Cep131	2.37076	1.98618	1.99639	2.2488	2.1175	2.20159	5.7628	4.99802	5.27099	4.72943	5.6303	7.16365	0.462124	0.245162	0.26127	0.180852	0.421186	0.440807	0.609289	0.592099	0.604446	0.240975	0.85775	0.766804	1.61987	1.61963	1.6154	1.59139	1.4117	1.30998	1.33627	1.64908	1.68209	1.68229	1.6823	0.163616	0.163355	0.160348	0.149783	0.137576	0.184006	0.196904	0.191006	0.192282	0.192295	0.192296	3.61568	3.60486
12013	Bach1	2.93364	2.89181	3.16328	3.40861	2.97973	3.12926	3.03915	3.03245	3.08726	3.2141	1.95354	1.82079	0.562963	0.635483	0.723363	0.617966	0.52885	0.456877	0.808819	0.860545	1.06989	0.878521	0.899198	0.901047	5.05947	5.05947	5.05947	5.05946	5.0306	4.66571	4.43133	4.00002	3.4889	3.48849	3.48849	0.475515	0.475515	0.475514	0.475503	0.458826	0.405895	0.403965	0.351782	0.327869	0.327865	0.327865	10.4511	10.4511
12017	Bag1	2.90885	2.81064	2.7428	3.13466	3.00641	2.86042	8.69393	13.0535	8.2612	11.8034	13.3529	14.1955	0.526628	0.856892	0.926405	1.1053	1.14358	1.05308	0.677342	0.735529	1.28564	1.2138	1.34079	1.37736	107.092	107.048	106.805	106.671	106.768	106.874	106.977	115.537	143.235	145.533	149.143	0.680458	0.726305	0.989018	1.17198	1.22497	1.22555	1.22332	1.23966	1.22932	1.23401	1.2791	83.2082	83.2082
12021	Bard1	3.02705	2.61347	2.3477	2.57995	2.49212	1.84162	5.78351	6.11681	6.63558	6.69509	4.72019	4.95935	0.241579	0.249294	0.2049	0.268587	0.14788	0.254223	0.271344	0.296906	0.325217	0.376937	0.166156	0.286406	3.69592	3.69352	3.60655	3.5412	3.31337	2.96991	2.88634	2.89394	2.89398	2.89398	2.89398	0.473936	0.468381	0.430953	0.394542	0.292539	0.327799	0.392245	0.394896	0.394896	0.394896	0.394896	10.4291	10.0799
12028	Bax	3.66961	3.72536	3.83973	4.38647	4.09206	4.21312	4.94392	9.08731	9.02394	7.51326	7.72281	7.63113	0.965805	1.49789	1.57231	1.67628	2.12285	2.19889	9.8632	9.20501	8.48833	9.55811	9.8084	9.40354	44.3438	44.1599	43.9378	43.7992	43.8885	44.155	43.3842	53.2704	54.428	54.4311	54.4291	1.40714	1.60497	1.88173	2.10873	2.31844	2.15068	2.26671	2.08634	1.9599	1.93916	1.93279	48.6026	48.6026
12033	Bcap29	2.04791	3.02579	3.04265	3.46221	2.63037	2.95911	3.20441	3.49916	2.94864	3.18459	2.95738	4.50351	0.150083	0.190376	0.224625	0.237873	0.305457	0.309335	0.173804	0.125688	0.165866	0.0640388	0.372633	0.424498	8.55537	8.55537	8.55537	8.55538	8.63349	9.30841	9.76425	10.3002	11.8505	12.5471	12.5553	0.162441	0.162441	0.162441	0.162441	0.180377	0.226976	0.227076	0.22469	0.221233	0.222638	0.222638	9.73709	9.73709
12034	Phb2	7.60861	8.59363	8.74364	9.56824	8.30147	7.96762	10.1313	12.7776	12.6302	14.0273	13.481	14.0315	1.90307	3.37586	3.61471	4.24749	4.16878	3.77999	0.979919	1.48883	1.88746	1.97865	2.26147	2.11549	117.223	116.24	115.46	115.372	115.786	116.208	117.484	141.413	175.318	179.541	179.875	7.82943	8.84626	9.78246	10.0652	10.181	10.2236	11.0068	11.0189	11.5111	11.5127	11.5127	74.5751	74.5751
12035	Bcat1	8.95633	8.56244	8.01497	8.87726	8.26785	8.99823	14.8848	14.1774	15.0898	17.4034	15.995	15.5364	1.34477	1.54153	1.74126	1.69674	1.73078	1.58956	2.90948	3.89566	3.75969	3.61246	4.65995	3.71548	34.5022	34.4764	34.3621	34.7879	36.3376	37.419	38.171	40.2983	43.166	43.3187	43.327	0.648183	0.674426	0.836132	0.945406	0.94982	0.94982	0.949817	0.872455	0.757738	0.757737	0.757737	25.0635	25.0639
12042	Bcl10	2.1726	1.6448	1.83304	1.3857	1.92673	1.6277	1.06131	1.29507	0.98546	0.820971	0.878468	1.15368	2.41122	2.52414	2.64579	2.45632	1.68324	1.68301	2.29748	2.53039	2.53757	2.56274	1.82696	1.61637	10.7044	10.7024	10.6822	10.6049	9.93401	9.22157	8.74876	8.04199	6.59437	5.57725	5.35562	0.743697	0.741099	0.726322	0.690608	0.586618	0.564803	0.560466	0.545455	0.431043	0.380261	0.370627	11.5728	11.4927
12043	Bcl2	1.1506	2.76161	3.33379	4.40677	3.52419	3.97128	2.30221	3.16139	4.26536	3.91045	3.01835	3.52352	0.110863	0.10747	0.114585	0.113028	0.120048	0.125607	0.113772	0.170222	0.164652	0.187152	0.266629	0.268242	1.94214	1.94215	1.94215	1.9422	1.94513	1.97649	2.08625	2.43131	2.31526	2.02026	1.95546	0.123478	0.123479	0.123482	0.123502	0.124296	0.130172	0.142685	0.155893	0.144232	0.127172	0.124144	3.57635	3.57637
12048	Bcl2l1	3.38722	3.00916	3.02976	2.74073	3.05874	3.10185	10.1785	8.49619	8.58615	7.99569	6.41793	7.20562	0.803438	0.811092	0.854676	0.86963	0.49485	0.448518	0.724085	0.729689	0.830769	0.608328	0.39123	0.523687	14.3044	14.3044	14.3044	14.3042	14.0718	12.5354	11.4705	10.4541	9.51937	6.78579	6.65751	0.431944	0.431944	0.43194	0.431827	0.382591	0.315927	0.313732	0.313611	0.266588	0.202142	0.200974	19.8206	19.8206
12050	Bcl2l2	0.977572	0.67462	0.609461	0.483867	0.584364	0.473593	3.5953	2.85375	3.49374	3.1437	2.80369	2.73613	0.644342	0.499846	0.404434	0.381066	0.608624	0.508811	1.14044	0.818253	0.682369	0.652793	0.690049	0.875549	5.75117	5.66016	5.33763	4.9632	4.28881	4.08409	4.02823	4.0099	4.05332	4.18798	4.42571	1.07002	0.967721	0.847928	0.790366	0.75195	0.747132	0.746018	0.746245	0.755436	0.782197	0.827801	16.8403	14.3599
12053	Bcl6	1.91252	1.16911	1.1654	1.29598	1.08335	1.27901	8.20391	6.90271	6.87231	6.98938	7.48216	5.85636	0.828726	0.833948	0.870264	0.859216	0.658689	0.555626	0.591357	0.628055	0.800403	0.640649	0.709297	0.583964	3.57883	3.55712	3.46798	3.35227	3.11363	3.02307	2.98972	2.91615	2.70939	2.65043	2.63779	0.427914	0.407997	0.380258	0.366261	0.357417	0.356179	0.355301	0.346023	0.322419	0.316604	0.315319	8.36476	7.78862
121021	Cspg4	2.3564	2.16514	2.16091	2.51749	1.93004	2.05052	3.7257	2.16411	2.33475	2.54348	1.85783	2.70412	0.816813	0.807686	0.724113	0.602483	0.614051	0.642155	1.37133	1.39417	1.11375	0.955707	0.960219	0.686619	4.91165	4.91093	4.9097	4.90864	4.90645	4.90338	4.88873	4.10899	3.3882	3.37552	3.37512	0.445993	0.445456	0.44536	0.44535	0.445279	0.444496	0.440181	0.335993	0.306805	0.306488	0.30647	6.88669	6.87695
121022	Mrps6	1.53748	1.60597	1.70032	1.54201	1.72522	1.5988	11.5394	9.53718	9.49617	9.94668	9.39045	8.90893	0.943282	1.10777	1.3392	1.78026	1.04517	0.944343	0.984543	1.12747	1.21678	1.34703	0.822048	1.15063	30.6278	30.6278	30.6278	30.6278	30.6278	30.6278	30.6278	31.1855	35.7756	35.7822	36.5124	0.505223	0.505223	0.505223	0.505223	0.505223	0.505223	0.505223	0.548827	0.590248	0.590249	0.612475	51.5577	51.5577
12121	Bicd1	1.57217	1.80399	1.82728	1.67656	1.81008	2.11694	3.64265	6.11685	5.75114	6.30403	5.61739	7.14487	0.0789692	0.0453383	0.0527949	0.0692554	0.097589	0.118714	0.0922551	0.0920016	0.0391796	0.071258	0.0721272	0.206404	0.806415	0.806515	0.807272	0.809758	0.823611	0.873314	0.964731	1.25017	1.33829	1.44091	1.48479	0.104428	0.104498	0.104818	0.105682	0.114545	0.129624	0.139948	0.149191	0.159504	0.171283	0.176099	3.22108	3.22417
12122	Bid	4.97572	4.03704	4.32899	3.76108	4.48039	3.6508	8.73566	11.1364	11.1251	12.0064	8.3343	8.58372	1.20666	1.61139	1.60683	1.70895	1.40031	1.17305	1.88944	1.77041	1.78452	2.02565	1.54928	1.93652	25.5084	25.386	25.0565	24.7095	23.8682	23.3047	22.9289	22.397	20.3763	16.3927	15.8018	1.05932	1.10892	1.10437	1.09209	1.08999	1.08997	1.08977	0.952293	0.796432	0.676125	0.66973	20.6353	19.1878
12125	Bcl2l11	4.86713	4.21625	4.55837	4.79684	4.5702	4.67156	6.16079	5.75229	6.99905	6.6737	5.27374	5.12418	0.511851	0.332382	0.51316	0.488297	0.442502	0.282293	0.370318	0.207812	0.30443	0.370037	0.247997	0.180535	1.47669	1.47897	1.5425	1.66366	1.81063	1.83262	1.83567	1.68439	1.3494	1.34863	1.34862	0.255533	0.259052	0.299149	0.316011	0.317774	0.317774	0.317706	0.279771	0.233458	0.233372	0.233371	5.6843	5.85709
12153	Bmp1	1.05267	0.82601	0.720744	0.844194	0.798258	0.769589	1.80081	1.17016	1.7951	1.21644	1.18907	1.43032	0.458654	0.338576	0.338781	0.313107	0.31654	0.263433	0.588533	0.563842	0.695285	0.48373	0.591339	0.554997	6.84603	6.84603	6.84603	6.84603	6.84579	6.76582	6.36866	5.9693	5.47071	4.76294	4.75843	0.186123	0.186123	0.186123	0.186123	0.186062	0.173982	0.162145	0.161861	0.140015	0.129384	0.129367	11.2404	11.2404
12175	Bnip2	2.48772	1.83136	1.71454	1.55928	1.88635	2.10824	9.82636	9.87806	9.02064	10.0174	7.0554	7.65108	1.10237	1.15642	0.971136	0.923852	0.920177	0.852766	4.26634	3.50704	3.61407	3.54011	3.25524	3.10385	30.1927	30.0901	29.4162	27.9424	27.414	27.0978	26.8016	25.1396	24.2037	24.1622	24.1589	2.26307	2.14892	1.93404	1.82803	1.77685	1.76454	1.74053	1.62763	1.60437	1.60345	1.60333	38.3297	35.0948
12176	Bnip3	2.14385	1.97942	1.79421	1.78115	1.84668	1.90811	4.83678	3.59072	4.25276	3.94216	4.31436	3.5882	0.426571	0.378327	0.276923	0.30018	0.314016	0.300941	0.537862	0.488534	0.427497	0.318766	0.480513	0.43467	27.6168	27.5618	27.193	26.5626	24.7134	23.3089	22.1695	17.9535	15.2824	15.0555	15.0376	0.305184	0.287595	0.245489	0.226458	0.219231	0.216475	0.208645	0.170835	0.166266	0.166168	0.16616	18.2828	17.0013
12177	Bnip3l	2.95675	2.4422	2.42773	2.1718	2.29009	2.04873	3.41952	4.58036	4.24738	4.23361	3.83723	3.70278	0.417557	0.399718	0.433974	0.419971	0.26682	0.313871	0.550488	0.513778	0.741331	0.4861	0.331843	0.292847	28.2167	28.2167	28.2167	28.2167	28.2166	27.9015	26.7547	23.9707	18.1971	17.8503	17.8307	0.23753	0.23753	0.23753	0.23753	0.237498	0.208557	0.202003	0.167664	0.15009	0.15009	0.15009	20.2937	20.2937
12181	Bop1	9.91449	11.7553	10.7918	12.4103	10.8602	11.2968	7.77441	13.8035	13.1267	15.0183	11.7125	11.484	3.26901	4.10608	3.97755	3.98778	3.57661	3.11505	1.61333	2.0155	4.13471	3.84286	2.99265	3.60494	57.891	57.7169	58.153	59.9494	64.6989	68.1262	71.2038	95.6466	103.087	103.435	103.448	0.741418	0.92767	1.38009	1.58861	1.65867	1.53324	1.53985	1.47483	1.3125	1.2843	1.27549	43.3111	43.4342
12183	Bpgm	1.1286	0.803164	0.712853	0.651483	0.80109	1.02944	3.98893	4.57424	4.30207	4.52171	5.18894	4.98306	0.170096	0.243371	0.116203	0.131039	0.174955	0.194302	0.190016	0.258471	0.296916	0.228101	0.299921	0.323558	7.25895	7.21007	7.01877	6.79085	6.29001	6.02678	5.89215	5.77665	6.32983	8.19846	9.45062	0.213517	0.195467	0.176488	0.171172	0.169291	0.169193	0.169202	0.170109	0.193442	0.251288	0.28182	9.77901	8.79159
12189	Brca1	2.97809	2.88568	2.80209	3.19818	2.72712	2.78077	4.96049	3.46331	2.56353	1.9078	2.6053	3.60504	0.378215	0.27585	0.246912	0.207281	0.257196	0.324436	0.570994	0.586632	0.508463	0.452194	0.339789	0.621147	11.9145	11.8459	11.5982	11.2154	9.89668	8.89502	8.27922	7.69287	8.6739	10.387	12.1724	0.36322	0.339646	0.309278	0.284406	0.247069	0.235443	0.23164	0.235625	0.272777	0.327004	0.380522	16.1122	14.8829
12190	Brca2	4.68345	4.59325	4.2452	4.3701	4.36351	3.93143	10.7775	10.168	10.3992	10.1622	8.37212	12.9499	0.22036	0.153874	0.166049	0.130066	0.181038	0.257726	0.228021	0.318293	0.167979	0.195056	0.30917	0.180474	4.28039	4.26389	4.19775	4.09485	3.7659	3.54043	3.41033	3.27778	3.36455	3.5794	3.85049	0.18591	0.177324	0.165134	0.156007	0.145205	0.142713	0.141971	0.142182	0.147431	0.157541	0.169428	5.75824	5.41867
12192	Zfp36l1	5.93231	5.18933	5.13295	6.09429	5.41302	6.67383	22.4793	18.8146	14.8608	17.1766	20.752	20.4915	3.59868	2.19293	2.07363	2.02913	3.30312	3.22989	2.89882	1.91307	1.86451	1.65452	2.72914	2.6917	7.73816	7.73784	7.71727	7.41175	6.0793	6.6312	7.5302	7.63731	7.62694	7.62693	7.62693	2.79345	2.79383	2.81715	2.81397	2.80938	3.43918	3.5481	2.78994	2.78267	2.78266	2.78266	36.7425	36.7424
12193	Zfp36l2	9.81879	8.45891	9.05982	9.8022	8.92819	9.48255	23.0345	21.6704	17.5086	24.7853	22.3368	20.1206	9.89704	10.3226	11.8918	13.7971	9.10394	7.76449	6.72686	8.12258	8.94877	10.7434	7.25285	5.39781	28.8931	29.1313	29.8813	30.7859	32.7282	33.4651	33.5895	31.7273	23.4448	17.6217	15.0666	1.98961	2.09978	2.21182	2.27319	2.32487	2.325	2.30954	2.13917	1.5565	1.18584	1.02574	68.693	73.3068
12224	Klf5	3.01059	3.69804	3.66057	3.499	3.40667	2.99232	7.30225	8.8133	10.6373	8.60774	5.67751	6.42619	0.806072	1.42085	1.51243	1.53955	1.00778	1.0972	0.699992	1.37991	1.37545	1.23314	0.77085	0.757363	1.83842	1.83842	1.83842	1.83842	1.83842	1.81824	1.65602	1.65374	1.48039	1.30603	1.30603	0.797207	0.797207	0.797207	0.797207	0.797206	0.777662	0.717202	0.717121	0.630606	0.566344	0.566344	23.4855	23.4855
12227	Btg2	1.26535	0.926914	1.14576	0.983227	1.51926	1.0919	14.4566	13.9388	14.0235	13.3182	12.611	13.8761	1.0177	1.6091	2.17573	1.6153	0.688641	0.663418	0.832384	1.16604	1.83661	1.45868	0.552586	0.35491	1.75545	1.75545	1.75536	1.75326	1.50132	1.14618	0.996855	0.90619	0.670022	0.65402	0.653862	0.360145	0.360141	0.359927	0.35589	0.213178	0.186956	0.186209	0.184722	0.135389	0.134161	0.134145	3.47016	3.47003
12228	Btg3	1.1996	1.36828	1.38363	1.41898	1.253	1.07517	2.14764	2.73247	2.34897	3.73817	2.50382	3.17892	0.882236	1.05064	1.09094	1.1635	1.02554	1.12729	0.764206	0.868956	1.04174	1.07948	0.947196	0.882549	27.554	27.5545	27.8343	28.5233	29.9407	30.6906	31.0873	31.9282	33.4364	33.4471	33.4472	1.01672	1.01752	1.14526	1.16342	1.16354	1.16354	1.16354	1.21447	1.23417	1.23417	1.23417	35.0859	35.1592
12235	Bub1	1.2117	0.800374	0.671151	1.05763	0.553137	0.750417	3.35124	3.11503	2.64901	3.04284	2.78293	4.61562	0.430978	0.316231	0.223067	0.286254	0.394041	0.536313	0.0610682	0.0783418	0.0756293	0.0391796	0.119896	0.0391796	31.9531	31.7768	31.2693	30.6562	29.0095	27.8306	27.0891	26.6027	29.4312	32.6592	34.6102	0.854214	0.784715	0.731248	0.698645	0.636299	0.667886	0.72786	0.818034	0.929401	1.02063	1.07075	30.8698	27.985
12236	Bub1b	3.88503	2.91097	3.1964	3.68471	3.10106	3.96917	4.93222	5.09125	4.26047	4.38752	5.67564	6.0572	0.747979	0.556033	0.543312	0.524036	0.718901	0.863284	1.34517	1.15419	0.975612	1.10129	1.43249	1.671	53.578	53.5858	53.6126	53.659	53.9148	54.3297	54.8772	57.8887	64.7462	70.446	74.7273	0.470878	0.472077	0.473604	0.475324	0.481331	0.488208	0.495639	0.527492	0.586813	0.632777	0.66689	42.6688	42.786
12238	Commd3	1.4161	1.16753	1.52617	1.27032	1.58439	1.45663	9.40279	5.94973	5.93941	6.09942	5.5074	6.32156	1.06785	0.669729	0.447325	0.690159	1.00335	0.86792	1.30037	0.793308	1.09686	1.153	1.28015	1.27282	30.1671	30.0986	29.8314	29.4188	27.9432	26.6455	25.6589	23.8199	23.3536	23.5377	23.8696	1.14956	1.09666	1.03089	0.983937	0.92108	0.901628	0.893874	0.886982	0.890644	0.900319	0.914433	23.0567	21.5678
12257	Tspo	4.6932	4.01482	3.88307	4.4818	4.32426	4.16756	7.58176	8.27459	7.1478	6.96928	6.63028	5.77461	2.31208	2.52853	2.23527	1.75605	1.98388	2.51822	2.82612	2.38123	2.18715	1.9867	2.64478	3.29513	83.0824	83.0824	83.0604	82.1153	79.1673	77.0263	75.4714	72.4942	69.2488	55.4465	54.2415	0.640977	0.640976	0.626375	0.550569	0.55044	0.55044	0.55044	0.55044	0.468508	0.417692	0.417692	53.1572	53.1571
12261	C1qbp	5.89662	6.57139	5.92144	6.77298	6.02652	5.95255	10.5099	10.8321	12.8607	12.733	13.8404	12.3333	2.15738	3.76021	3.47845	4.04891	4.65653	4.49637	3.1287	4.24199	4.64204	4.97665	5.99401	5.43859	48.6401	48.379	48.0005	48.204	48.519	48.6069	49.2325	60.4811	71.2812	71.6261	71.6261	2.25255	2.53636	3.15733	3.1836	3.18435	3.1845	3.39938	3.33346	3.31278	3.31336	3.31336	124.848	124.848
12282	Hyou1	5.73071	6.29649	6.08435	6.66403	6.12272	5.83431	9.32358	11.8551	12.3752	12.7629	9.91087	9.32453	0.883611	1.34509	1.23452	1.28682	1.10285	1.06754	1.25743	1.65166	1.72165	1.76303	1.51517	1.48015	64.4092	64.4092	64.4092	64.4092	64.4092	64.4092	64.4092	65.4367	76.9073	77.6332	82.492	1.04493	1.04493	1.04493	1.04493	1.04493	1.04493	1.04493	1.15774	1.25981	1.26104	1.38608	46.6535	46.6535
12295	Cacnb1	1.58718	1.70107	1.42105	1.60385	1.58133	1.50821	3.08455	2.78901	1.7829	2.45134	3.19435	3.78761	0.23649	0.177338	0.171507	0.11875	0.315638	0.318258	0.866417	0.794989	0.822054	0.676022	1.44912	1.33733	0.869987	0.872145	0.893978	0.938011	1.02003	1.03838	1.04196	1.04374	1.09114	1.15443	1.16553	0.145688	0.14833	0.160846	0.170561	0.174497	0.174614	0.174628	0.174861	0.183893	0.19364	0.195225	2.92156	3.01849
12297	Cacnb3	1.58265	1.66807	1.30515	1.54943	1.60042	1.38154	4.28313	3.76719	3.0991	2.72003	4.54962	4.12061	1.3952	1.03511	0.798919	0.704598	0.896438	0.699581	2.43545	1.87549	2.17292	1.75474	2.28004	1.97219	7.58473	7.57367	7.5221	7.42312	6.95615	6.75125	6.73605	6.33756	5.22621	4.35359	3.88635	0.342828	0.335782	0.322581	0.307763	0.274733	0.259342	0.251277	0.230598	0.187501	0.158711	0.144082	8.94059	8.69022
12301	Cacybp	7.32614	6.30734	5.91122	6.2523	5.71002	6.17059	8.15126	8.92131	8.40904	9.2658	9.32618	7.75791	1.40132	1.38147	1.2935	1.46836	1.74093	1.70346	1.81626	1.68488	1.43276	1.41255	1.9975	2.1469	140.652	140.652	140.652	140.652	140.652	140.652	140.652	140.652	162.61	170.516	175.484	1.8623	1.8623	1.8623	1.8623	1.8623	1.8623	1.8623	1.8623	1.81405	1.81416	1.76128	131.005	131.005
12304	Pdia4	4.73742	4.78112	4.47928	4.36745	4.58856	4.78194	9.97114	8.43784	8.36272	7.53433	6.98114	7.13816	0.762417	0.587184	0.458909	0.382636	0.574992	0.625911	1.53418	0.871048	0.95	0.667013	1.12465	1.20216	92.1482	92.0458	91.5782	90.76	87.7245	85.0262	82.8752	78.1021	75.9167	76.2265	77.6695	0.705069	0.681183	0.641232	0.611469	0.583381	0.578954	0.577856	0.577383	0.579416	0.586536	0.601761	47.6029	45.7677
12306	Anxa2	2.00539	1.62078	1.513	1.75965	1.69261	1.66075	16.9158	12.4574	14.0831	15.9876	7.84214	10.6841	3.33183	3.23504	3.1051	3.44478	1.76812	1.77013	3.12339	4.04743	3.18387	2.8379	1.49306	1.7343	444.238	442.402	438.305	433.405	418.555	404.697	392.35	352.03	289.597	247.68	222.171	2.31495	2.14456	2.06003	2.01376	1.58214	1.46966	1.43746	1.3075	1.08714	1.00535	1.00222	287.74	265.85
12313	Calm1	2.70896	2.48722	2.91276	2.65454	2.81568	2.69812	19.2953	18.252	15.3824	17.0351	18.3345	17.3089	1.72865	1.9027	1.66944	1.6737	1.76089	1.6755	1.96911	1.68808	1.87942	1.55083	1.88389	1.85384	114.343	114.208	114.199	114.211	114.244	113.797	111.611	106.967	103.852	92.7253	91.2079	2.02939	2.17005	2.19353	2.19389	2.19376	2.05876	2.00622	1.79275	1.6413	1.50034	1.50031	65.4504	65.4504
12314	Calm2	3.58768	3.28858	3.55722	3.55793	3.65939	4.15022	14.7288	14.0211	12.6998	13.2481	13.6264	14.222	2.31506	2.37761	2.01583	2.27962	2.18911	2.31796	3.42235	3.16715	2.97255	2.70908	2.98338	2.93366	322.98	322.98	322.891	321.103	314.671	298.293	287.045	268.783	264.347	264.166	264.159	2.41866	2.41866	2.37735	2.29654	2.05734	1.97817	1.97817	1.97817	1.97817	1.97817	1.97817	258.232	258.232
12316	Aspm	1.86541	1.80542	1.74955	1.77805	1.69558	1.8381	4.37154	3.78958	3.50299	3.5965	3.46407	4.75554	0.403759	0.298124	0.221951	0.226514	0.267644	0.257485	0.698037	0.570831	0.565866	0.454272	0.51235	0.392464	13.7258	13.6636	13.2832	12.6632	11.0684	10.1753	9.70235	9.23309	9.8054	11.9815	13.5107	0.522394	0.487004	0.40796	0.367824	0.35043	0.349462	0.349357	0.350542	0.384123	0.472496	0.520604	17.6995	16.0671
12317	Calr	4.1945	3.44397	3.31691	3.43143	3.28906	3.41305	22.5262	18.1502	15.3546	15.8562	18.7195	19.2593	4.40279	2.84949	2.27002	2.1904	2.78219	2.90115	6.70827	5.35259	5.18545	5.51203	5.63942	6.31022	604.93	604.693	599.774	594.804	581.438	568.721	552.392	514.884	495.311	492.438	492.015	4.16881	3.91695	3.39481	3.01805	2.56991	2.61055	2.90471	3.38971	3.42177	3.42272	3.42283	289.746	268.596
12321	Calu	3.46179	4.43772	3.75846	3.60482	3.66784	3.16804	15.4762	14.6874	13.2881	14.3804	12.5717	13.1174	1.5236	1.66125	1.67786	1.88286	1.31111	1.23894	3.08641	3.52538	4.18952	3.67031	2.91355	2.46121	198.105	198.105	198.105	198.105	198	193.619	189.317	180.654	172.566	148.796	145.851	1.38532	1.38532	1.38532	1.3853	1.2566	1.14991	1.14916	1.14916	0.950785	0.866172	0.866078	117.64	117.64
12325	Camk2g	2.40989	2.64982	2.71996	3.32694	2.70252	3.02546	2.23104	1.03733	1.75401	1.23234	1.76923	2.24627	0.888861	0.841308	0.971863	0.85968	0.768469	0.759701	3.05329	3.33404	3.14494	2.81839	2.70646	3.15168	15.6432	15.6432	15.6432	15.6432	15.637	15.2847	14.2587	12.9882	12.4323	11.0954	11.0398	0.625918	0.625918	0.625918	0.625916	0.623768	0.561182	0.519479	0.516393	0.483023	0.442366	0.441694	22.0875	22.0875
12331	Cap1	3.66893	3.36396	3.31258	2.96858	3.21892	2.81144	6.35623	8.32337	7.27364	6.73092	5.74796	4.20845	1.16195	1.1382	1.08753	1.0091	0.723014	0.731458	2.14907	2.47606	2.61459	2.10887	1.40073	1.57441	59.8675	59.7934	59.3981	58.5573	54.6631	51.0843	48.4669	43.189	37.433	35.2571	34.6921	1.01767	0.993321	0.937224	0.872802	0.7721	0.747648	0.738057	0.698906	0.617465	0.594328	0.58834	52.0124	50.515
12332	Capg	1.69953	1.19327	1.04873	1.29796	1.32754	0.952312	5.88371	3.47502	4.42397	4.40052	2.61607	3.12899	1.32544	1.17779	1.13425	1.07179	0.817382	0.74787	0.789098	0.734516	0.616563	0.296251	0.58753	0.413024	55.6449	55.3737	54.8326	54.1591	51.992	50.0418	48.3216	42.72	33.4528	26.2484	21.2941	0.394692	0.35541	0.277377	0.231022	0.220036	0.214617	0.209571	0.188067	0.146436	0.121303	0.11598	32.8865	29.6032
12333	Capn1	1.3127	0.642292	0.781322	0.769182	0.81462	1.0258	2.54336	2.18869	1.64426	1.15242	1.50827	1.67553	0.271905	0.232144	0.140189	0.0871462	0.212767	0.161613	0.311536	0.246202	0.236249	0.277295	0.241539	0.167982	4.63477	4.63477	4.63436	4.61416	4.38095	4.20999	4.09423	3.90244	3.44792	2.99675	2.97205	0.0750398	0.0750389	0.0747801	0.0680218	0.0623598	0.0623575	0.0623572	0.062354	0.0500151	0.0481054	0.0481005	3.61418	3.6141
12336	Capns1	1.85227	1.84067	1.53197	1.67803	1.73606	2.00641	4.68792	6.16811	5.06272	5.31765	3.29261	4.56346	0.973607	0.77358	0.772361	0.864502	0.509298	0.473774	1.59692	1.58339	1.39099	1.3743	1.18696	1.12701	78.687	78.3122	77.4139	76.3079	72.8594	69.8254	67.2246	60.1304	51.6332	45.8723	41.9437	0.767467	0.708525	0.674516	0.654537	0.598415	0.510585	0.499609	0.463207	0.404767	0.418756	0.391216	59.2251	54.4029
12340	Capza1	4.80873	4.54667	4.41699	4.99339	4.97521	5.08628	11.922	9.79223	9.47931	9.49539	9.7843	7.56555	0.849053	0.700989	0.718776	0.749696	0.645303	0.697803	1.45971	1.25027	1.50246	1.33412	1.0124	1.06081	95.6774	95.6754	95.6129	95.1078	91.0631	87.6263	85.1275	80.3742	78.7197	78.8804	81.4681	0.802832	0.802146	0.788321	0.727467	0.660676	0.659405	0.659343	0.659335	0.659521	0.664553	0.699301	61.8541	61.7855
12345	Capzb	1.70222	1.56516	1.86377	2.08222	1.62473	1.60702	2.55848	2.26322	3.26474	2.97524	1.90782	2.26275	1.14233	1.23965	1.37397	1.37051	0.880919	0.796158	2.72803	2.62775	2.92867	2.7162	1.89022	1.94104	49.0725	49.0725	49.0725	49.0725	48.9703	46.0983	43.9317	41.5881	39.1094	32.1848	32.0831	0.794222	0.794222	0.794222	0.794222	0.77086	0.66994	0.66952	0.669518	0.584632	0.519273	0.519242	60.1686	60.1686
12359	Cat	1.93471	1.3391	1.47167	1.61335	1.5221	1.35148	9.01295	8.05531	7.38578	8.39123	8.83938	10.2682	0.372312	0.251242	0.197369	0.177125	0.25622	0.25167	0.456082	0.322826	0.284222	0.1239	0.409814	0.341054	20.8695	20.5719	20.1241	19.7441	18.9164	18.4111	18.0991	16.7756	16.4769	16.4712	16.471	0.17024	0.143767	0.143725	0.143725	0.143725	0.143724	0.14341	0.13436	0.13436	0.13436	0.13436	20.5977	17.3923
12366	Casp2	2.63326	2.99167	2.9431	2.3415	2.47863	2.63282	5.08567	4.44049	4.28396	3.16321	2.93283	3.97714	0.829957	0.625236	0.539382	0.632415	0.605011	0.631041	1.30718	1.34934	0.89365	0.763304	0.950069	1.09714	10.8323	10.7695	10.4524	9.96597	8.76797	8.20618	7.971	7.82264	8.02036	8.76988	9.87942	1.03951	0.978494	0.865907	0.798255	0.754619	0.75043	0.749679	0.750901	0.775321	0.855114	0.961957	19.8732	18.0524
12367	Casp3	1.50405	1.46172	1.62312	1.45002	1.47807	1.40545	7.81071	6.88822	7.22801	7.63742	6.3394	5.54116	0.434965	0.497451	0.318896	0.459478	0.218627	0.259492	0.797807	0.80311	0.645116	0.791966	0.417773	0.429706	26.7768	26.6794	26.4222	26.0909	24.9975	23.9908	23.1377	20.8944	18.6968	17.4344	16.5863	0.448993	0.422532	0.404503	0.392972	0.373772	0.362972	0.355118	0.333304	0.30521	0.286976	0.274394	21.2655	19.8735
12370	Casp8	1.01933	0.738704	0.774183	1.02946	0.821848	0.840172	4.90456	2.86208	3.04426	3.78795	2.08209	2.33234	0.247179	0.229708	0.183305	0.154351	0.0930017	0.14273	0.404105	0.442605	0.50221	0.484944	0.289503	0.301213	9.22807	9.15406	8.9622	8.71968	7.96449	7.27311	6.74554	5.69926	4.95365	4.63247	4.4467	0.286068	0.267778	0.251616	0.234334	0.159889	0.156596	0.183955	0.187014	0.16648	0.15658	0.150681	16.025	14.9088
12371	Casp9	1.50048	1.5611	1.34688	1.41388	1.66089	1.29483	4.37525	4.41193	4.98101	3.57633	3.74754	4.4643	0.190202	0.185343	0.170539	0.0770642	0.126009	0.201851	0.347181	0.397705	0.219177	0.207158	0.228836	0.318609	1.00039	1.00039	1.00032	0.99346	0.892322	0.845526	0.826977	0.815097	0.814797	0.815309	0.890903	0.0861512	0.0861511	0.0860456	0.0793985	0.0701706	0.070169	0.0701688	0.0701683	0.0701683	0.0702483	0.079869	1.85166	1.85165
12380	Cast	1.52777	1.4817	1.64548	1.29368	1.34274	1.42134	5.49177	3.70424	3.58253	2.17389	2.5627	2.37817	0.240508	0.242571	0.204846	0.155965	0.118821	0.159138	0.542867	0.406	0.462271	0.446221	0.301619	0.164288	17.2733	17.2564	17.1785	17.0221	16.2347	15.33	14.534	12.097	10.1017	9.76883	9.69476	0.246375	0.242609	0.233622	0.217007	0.143233	0.134013	0.145813	0.137617	0.122509	0.120053	0.119411	18.6507	18.3439
12385	Ctnna1	1.89214	1.37632	1.42557	1.75409	1.41357	1.71544	8.19559	6.3051	6.25537	4.93748	3.9923	5.68658	0.876742	0.901549	0.829637	0.837077	0.568594	0.64985	1.6528	1.73753	1.7817	1.40982	1.01313	1.06469	82.6725	82.492	81.9686	81.2014	78.2579	74.8271	71.6064	62.2588	53.339	49.2145	46.8669	0.866213	0.838699	0.813005	0.791009	0.613636	0.607953	0.627009	0.564741	0.50069	0.467881	0.448302	74.91	72.3642
12388	Ctnnd1	1.84102	1.6486	1.76241	1.68679	1.52672	1.99908	9.79078	7.1297	7.6735	9.07534	7.68009	7.25082	1.34084	1.2868	1.28141	1.23333	0.809141	0.872921	1.81761	1.78342	2.405	1.9936	1.25188	1.31243	45.9955	45.9955	45.9955	45.9955	45.3823	41.9651	39.7157	36.3025	30.837	30.6721	30.6684	0.975316	0.975316	0.975316	0.97531	0.82229	0.763563	0.763517	0.731793	0.650309	0.650309	0.650309	43.6133	43.6133
12389	Cav1	4.65495	4.59407	3.53398	4.50464	4.27465	3.88628	4.85733	3.56295	4.19184	4.15553	3.75341	3.38429	0.687207	0.642814	0.479626	0.638513	0.396207	0.381715	0.645717	0.766042	0.490818	0.715028	0.294075	0.34784	108.608	108.529	108.198	107.575	104.623	101.303	98.1789	86.6262	61.1348	44.3247	36.9972	0.690168	0.676193	0.653294	0.629776	0.585902	0.566517	0.552359	0.478846	0.320113	0.248769	0.221625	58.022	56.7277
12390	Cav2	2.09062	2.09136	2.12061	1.94905	2.05721	2.13916	3.86688	2.45717	2.90492	2.62491	1.76763	2.09855	1.03227	0.848493	0.890926	0.976332	0.695966	0.70144	0.834014	0.736054	0.419105	0.621878	0.525786	0.308588	26.7367	26.666	26.4343	26.0478	24.8037	23.7074	22.6822	18.5474	12.8834	10.9994	10.3885	1.05292	0.906132	0.720262	0.647519	0.607755	0.585315	0.558767	0.444023	0.334198	0.323723	0.340458	20.4469	18.2334
12394	Runx1	1.34956	1.19557	0.81503	0.926724	0.99938	0.849593	0.290775	0.0802378	0.424561	0.0802378	0.0802378	0.192382	0.134981	0.221683	0.209705	0.205399	0.129354	0.101869	0.18336	0.479273	0.371409	0.121121	0.0866786	0.08711	1.24238	1.25355	1.28241	1.31777	1.40435	1.43141	1.41257	1.20006	0.884036	0.738853	0.664643	0.0774268	0.0800319	0.0828243	0.0852136	0.0891663	0.0892134	0.0870499	0.0732052	0.0543509	0.0456885	0.0412251	5.38887	5.58758
12408	Cbr1	0.442103	0.355875	0.21726	0.339769	0.285351	0.239164	1.15079	0.87099	1.18574	1.03057	1.47559	1.28427	0.00480178	0.0173913	0.0846769	0.169999	0.116088	0.247071	0.0391796	0.161955	0.0875836	0.0391796	0.089805	0.125415	5.67817	5.67817	5.67818	5.67817	5.67818	5.67822	5.67865	5.8535	6.66874	6.74471	6.99813	0.181966	0.181966	0.181966	0.181966	0.181966	0.181975	0.182059	0.198664	0.215511	0.216848	0.229672	4.67571	4.67571
12409	Cbr2	3.13512	2.09016	2.29628	2.02537	2.07549	2.03749	3.59022	2.45703	3.09215	2.02116	2.0219	1.68695	0.952599	0.832955	0.564454	0.773204	0.452998	0.311453	0.573382	0.40479	0.403365	0.27305	0.362264	0.283041	13.8839	13.8496	13.7462	13.6015	13.052	12.4366	11.8121	9.596	7.03109	5.93975	5.41709	0.27727	0.262628	0.250422	0.241637	0.223152	0.209032	0.196961	0.161944	0.127784	0.112967	0.105232	8.82143	8.26674
12416	Cbx2	2.33215	2.04858	1.7141	2.21412	1.88156	2.12468	4.31201	4.35321	3.89311	2.43392	4.21884	4.33444	0.832604	0.887295	0.697481	0.615114	0.552132	0.898724	1.23157	0.838123	0.721815	0.52928	0.773144	0.970586	4.56252	4.56252	4.56042	4.32535	4.08821	4.48837	4.60058	4.41196	4.2452	4.24376	4.24375	0.524165	0.524165	0.524165	0.524165	0.521804	0.471466	0.467838	0.420093	0.419572	0.419572	0.419572	6.31776	6.31776
12418	Cbx4	1.92627	1.61795	1.63154	1.81537	1.56281	1.8534	11.84	9.43471	3.3724	8.58748	8.75486	9.43388	1.28632	0.909211	0.784519	0.861699	0.952085	0.779949	0.943342	0.858997	0.697462	0.650424	0.55894	0.604103	2.24762	2.23645	2.21288	2.19055	2.13972	2.01566	1.83272	1.6322	1.62407	1.62406	1.62406	0.469079	0.451065	0.443966	0.441994	0.43184	0.374015	0.344531	0.338958	0.338941	0.338941	0.338941	3.77543	3.55476
12421	Rb1cc1	1.0846	0.973137	1.12598	0.742695	1.02813	0.989468	7.06722	3.92257	4.7527	4.44506	3.90817	3.38145	0.578708	0.540322	0.43759	0.452295	0.461866	0.413529	1.73628	2.02791	1.89498	1.53595	1.46612	1.41058	20.3856	20.3679	20.2196	19.855	18.5112	17.6559	17.1538	15.1932	12.1186	11.8502	11.8236	1.14943	1.13403	1.07371	1.00577	0.948641	0.941468	0.932593	0.7993	0.675087	0.667515	0.666565	27.0258	26.4465
12443	Ccnd1	9.46032	10.7669	10.314	12.1567	11.2169	10.7481	9.11543	12.2177	11.6881	15.7021	11.6503	10.9358	3.4005	3.97802	5.09656	6.45681	4.14463	3.87617	3.12349	3.89859	4.54968	5.98312	4.77725	4.38012	68.5632	68.0383	68.2829	69.2745	73.7238	77.3577	80.0573	83.827	73.1656	53.2609	45.2856	3.61602	4.27529	4.72631	5.09628	5.45108	5.45712	5.21027	4.32339	3.42014	2.51708	2.26976	54.0277	55.7017
12444	Ccnd2	4.01879	4.54776	4.86382	4.77852	4.52775	4.35933	14.7365	15.8279	14.2614	18.6625	18.2838	17.7057	1.82748	2.63337	3.19915	3.18794	3.07541	2.87285	1.63091	2.26744	2.73475	2.83581	3.16817	2.59278	25.1857	25.1645	25.1086	26.0124	29.5147	31.5601	33.3858	41.6358	42.8367	42.8455	42.8456	0.446067	0.47249	0.744709	0.889254	0.934141	0.942217	0.92282	0.827859	0.828413	0.828414	0.828414	31.2374	31.371
12447	Ccne1	2.16481	2.3817	2.56263	2.91195	2.294	2.65494	3.93169	2.97727	3.27501	3.68011	3.52499	5.4219	0.457018	0.917455	0.615032	0.650404	1.01248	0.906495	0.534489	0.652769	0.607663	0.533812	0.917306	1.0399	18.699	18.6538	18.7498	19.2174	20.5081	21.4114	22.2936	27.844	29.7286	29.8269	29.832	0.44804	0.497971	0.630039	0.678689	0.681924	0.684505	0.700282	0.693237	0.693308	0.693308	0.693308	13.8073	13.947
12448	Ccne2	4.29679	5.84023	5.41477	5.9709	5.67862	5.32756	5.82589	6.69406	8.29556	8.05508	7.05643	8.8642	2.15554	2.27837	1.956	1.95551	2.59079	2.83378	1.68256	1.80172	1.71601	1.94169	2.29215	2.68295	13.1259	13.1387	13.6808	14.5039	16.2072	17.0807	17.5277	17.9638	17.9957	17.9992	18.4448	1.11806	1.15651	1.48236	1.52911	1.53289	1.53289	1.53289	1.53289	1.53289	1.53347	1.59653	17.5927	19.6981
12449	Ccnf	3.22063	3.0059	2.53186	2.67656	2.54398	2.85103	10.2707	8.79742	8.64081	9.82994	9.24962	8.74262	1.02775	0.951283	0.68814	0.721227	0.805184	0.876913	4.71182	4.50053	3.54601	3.2329	3.56861	4.57129	15.1665	15.0667	14.7738	14.391	13.2749	12.5537	12.2033	12.3701	13.3644	13.8472	14.0894	0.61169	0.573743	0.539768	0.516801	0.485653	0.479068	0.481138	0.506666	0.543581	0.560651	0.569419	23.116	21.4405
12452	Ccng2	3.66864	2.74134	2.45906	1.89841	2.42298	2.05802	11.5899	5.11393	6.59356	4.72908	3.6198	3.26488	1.45086	0.48468	0.674884	0.58414	0.369237	0.150237	1.35805	0.5849	0.650925	0.502957	0.364998	0.192967	7.90684	7.82384	7.63501	7.12543	5.2584	3.73565	2.78873	1.54008	1.70233	2.32606	3.04413	0.750166	0.661409	0.39733	0.27355	0.171813	0.196331	0.198956	0.158222	0.198896	0.271437	0.351886	11.3981	9.3042
12453	Ccni	3.39435	2.93764	2.57085	2.87293	2.74542	2.54146	12.3497	7.9099	8.39231	7.7707	8.07893	7.6412	2.11894	2.12841	2.12525	1.92456	1.62323	1.61685	5.59533	4.80404	4.69958	4.8224	3.9638	4.16361	40.6379	40.6166	40.454	40.0105	37.719	35.7556	34.4462	32.2858	29.5394	28.2223	27.9336	1.08	1.06872	1.02675	0.964495	0.873942	0.860508	0.85726	0.899412	0.894487	0.894115	0.888677	38.7632	38.2116
12454	Ccnk	2.80653	3.12415	2.84219	3.12546	3.27751	3.15182	3.91494	4.68191	4.22973	5.26935	4.35545	4.6709	0.71375	0.772285	0.780398	0.892751	1.05477	1.09931	1.05851	0.998412	1.0004	1.50484	1.79798	1.8028	5.67323	5.61405	5.61637	5.63875	5.8393	6.06501	6.12871	6.50527	7.31052	8.14228	8.49173	0.500535	0.566434	0.59656	0.59689	0.596893	0.596899	0.596972	0.61747	0.669271	0.669564	0.674126	16.6942	16.6942
12457	Noct	4.10744	4.18937	4.15723	4.37551	4.0993	4.69963	11.0819	12.4637	11.857	11.6079	13.285	12.8117	0.6881	1.26777	1.3143	1.34741	1.05002	1.05328	2.87183	3.9336	4.72749	5.13886	3.7899	3.29062	4.35838	4.28904	4.53303	5.02521	5.72896	5.89271	5.93701	5.94076	4.99643	4.69161	4.68825	0.459953	0.561106	0.747081	0.79926	0.803366	0.802843	0.792349	0.734778	0.604442	0.580278	0.580003	12.8158	13.4072
12464	Cct4	8.66457	8.08748	7.37221	9.07333	7.3842	8.25412	11.0959	12.6383	12.3803	12.454	12.5354	11.3316	2.09224	2.42662	2.18877	2.47339	2.13518	2.43339	3.51908	4.02687	4.03636	4.72564	4.1264	4.44158	192.815	192.815	192.815	192.814	192.813	192.811	192.811	193.049	214.009	214.881	222.267	3.67797	3.6782	3.67861	3.67918	3.68167	3.68463	3.68702	3.71925	3.91493	3.70381	3.82061	165.024	165.024
12468	Cct7	10.279	9.89863	8.90189	9.66582	9.25429	10.0282	15.7933	17.447	16.2174	17.5919	18.2464	17.1541	1.82062	2.64152	2.34629	2.52346	2.48028	2.43645	3.49772	4.56743	4.4588	4.98428	4.91168	5.23963	85.4462	85.3483	85.2153	85.2095	85.2916	85.3503	85.3869	86.0934	99.9966	100.405	104.362	1.48107	1.58419	1.74553	1.78961	1.80131	1.80166	1.80152	1.8655	1.87728	1.79816	1.90963	82.0195	82.0195
12469	Cct8	6.95319	8.10519	8.475	9.57785	8.76283	9.03786	7.9533	11.4403	12.6055	12.14	10.3076	10.0216	1.57625	2.28224	2.36354	2.46767	2.54029	2.50681	3.02201	3.50123	3.68915	4.28852	4.79755	4.57337	219.832	219.621	219.314	219.341	219.515	219.63	219.704	219.815	254.8	257.69	276.258	2.82415	3.04427	3.41301	3.46343	3.46996	3.47003	3.47001	3.46396	3.62899	3.48651	3.77411	199.307	199.307
12476	Cd151	7.03095	5.30506	5.50775	4.69295	5.89388	4.99285	13.7819	12.1185	12.4793	12.7198	7.05108	4.38562	5.80437	5.59671	6.56442	6.44368	3.56654	2.84279	5.90482	6.14106	6.01231	6.48997	5.46856	4.59989	69.14	68.9663	68.4451	67.6945	64.7291	61.3957	58.121	47.6705	36.9014	31.7352	28.549	1.15654	1.09775	1.04634	1.0059	0.918759	0.858363	0.812178	0.6938	0.573581	0.506295	0.461023	45.9069	43.2184
12484	Cd24a	6.69318	6.76494	6.58787	7.26095	6.53806	6.26568	13.6324	11.8178	9.73389	11.5583	12.8867	12.6049	3.80181	2.45752	1.90022	2.49527	2.86396	2.57681	2.91252	2.01974	1.58367	1.43953	2.22322	1.86737	245.031	245.03	244.998	244.225	235.735	228.677	223.363	204.466	187.003	185.194	185.01	1.59713	1.59704	1.58791	1.46819	1.35182	1.35152	1.3508	1.2142	1.20578	1.20578	1.20578	140.158	140.146
12505	Cd44	5.51552	4.30283	4.55134	4.62258	4.89413	4.64052	12.8955	14.6268	13.9399	16.4029	11.8953	12.7486	1.14778	1.80131	1.78834	2.05448	1.10043	1.20664	1.60164	3.14705	2.52866	2.36476	1.73094	1.80976	86.2343	86.2343	86.2343	86.2343	86.2276	84.4408	81.7865	78.046	77.4112	69.9666	62.2975	2.70258	2.70258	2.70258	2.70258	2.69821	2.4342	2.425	2.41419	1.99363	1.66548	1.59882	81.8569	81.8569
12509	Cd59a	0.606398	0.584642	0.551714	0.416502	0.433158	0.478313	1.08685	1.35063	0.89284	0.999388	0.8242	0.686615	0.10751	0.0217808	0.0476397	0.00480178	0.0817246	0.0521683	0.0391796	0.0391796	0.04398	0.0416441	0.0391796	0.0803267	1.97374	1.97319	1.95048	1.88868	1.74567	1.66943	1.62893	1.43274	0.988561	0.982849	0.982805	0.0165459	0.0164282	0.0143182	0.0133526	0.0132756	0.013275	0.0132694	0.0102631	0.00824081	0.00823891	0.00823888	2.50879	2.48759
12512	Cd63	6.55665	5.6591	5.42024	6.27957	5.51722	6.41837	6.83433	6.92195	5.8953	6.86898	7.13683	6.93003	6.91973	6.45475	6.80979	6.33234	5.95979	6.54974	3.0221	3.44168	3.42399	3.17755	3.05182	2.96593	167.188	167.188	167.188	167.188	167.181	158.397	154.376	152.297	152.267	145.44	137.575	0.755426	0.755426	0.755426	0.755426	0.754539	0.688005	0.688005	0.688005	0.688005	0.630305	0.621615	356.748	356.748
12514	Cd68	1.51928	1.32116	1.39639	1.56051	1.37141	1.87418	19.2229	22.0415	20.5001	22.7949	26.0994	22.6682	11.1158	17.7444	16.7038	10.2515	16.5929	14.3318	5.61848	4.98655	5.66122	5.65093	5.62187	4.22417	2.11877	2.11877	2.11867	2.11736	1.9743	1.75045	1.80325	2.1832	2.18767	2.18767	2.18767	0.584579	0.584576	0.584471	0.583262	0.513716	0.476617	0.512749	0.602844	0.603589	0.603591	0.603591	12.3791	12.379
12520	Cd81	2.02281	1.68163	1.50623	1.88071	1.68619	1.71288	12.5771	9.60881	9.86641	9.53168	11.0475	11.1568	1.30126	1.06491	0.809437	0.583129	1.17873	1.11152	5.77816	4.84041	4.2607	3.67945	4.69962	4.42084	119.855	119.33	118.192	116.977	113.707	111.1	109.034	103.778	96.278	91.8883	90.372	0.93534	0.8379	0.806751	0.798844	0.794605	0.793649	0.792464	0.777593	0.725771	0.706946	0.7021	58.9783	52.4758
12527	Cd9	1.37669	1.00937	1.15095	1.21512	1.25708	1.24058	5.89027	5.42174	5.20187	5.46844	3.4638	3.1321	0.772202	0.933049	0.93324	1.0421	0.566568	0.505706	0.842604	1.1531	1.03266	0.759911	0.577413	0.493785	91.9915	91.9915	91.9915	91.9915	91.9777	90.6912	89.5217	86.2792	64.6949	63.4173	63.3491	0.454109	0.454109	0.454109	0.454109	0.451774	0.428872	0.428865	0.377533	0.312699	0.312699	0.312699	67.3872	67.3872
12530	Cdc25a	6.35386	5.74433	6.03639	5.91658	5.93005	5.85989	10.7294	10.824	12.2926	11.529	10.1834	12.3737	1.69927	1.80488	1.86493	1.96277	1.88997	2.45811	2.70179	2.86611	3.00108	3.43972	3.51818	4.36472	13.4736	13.4911	14.1068	14.9058	15.6896	15.9725	16.0813	16.7006	18.062	18.0641	18.4925	2.04021	2.04021	2.04021	2.04021	2.04021	2.04021	2.04021	2.21267	2.28195	2.28226	2.35717	30.8521	30.8521
12532	Cdc25c	0.544845	0.529404	0.303081	0.341689	0.373039	0.470783	4.86632	3.41831	3.09423	3.15541	3.44512	4.21384	0.462418	0.134293	0.0611991	0.0941665	0.149768	0.23355	0.76536	0.641429	0.492056	0.277127	0.425168	0.518978	13.447	13.3209	12.8496	12.4003	11.3135	10.5061	9.99288	7.92328	7.2086	8.31848	9.25731	0.334942	0.294011	0.244624	0.217575	0.196727	0.193752	0.193144	0.195014	0.214782	0.248325	0.273516	16.1533	13.8444
12540	Cdc42	3.8545	3.16171	3.13059	3.12578	2.87036	2.9132	12.6872	10.2519	9.46441	10.6491	9.04696	7.25681	1.59686	1.4575	1.4238	1.56532	1.24677	1.41698	1.90472	1.72293	1.93995	1.83877	1.6954	1.45849	140.183	140.16	139.039	137.875	135.051	130.415	125.667	116.694	113.602	113.375	113.358	1.19389	1.17104	1.08793	1.08793	1.0869	0.965593	0.96542	0.96542	0.96542	0.96542	0.96542	91.4755	88.278
12545	Cdc7	2.28093	1.63829	1.70588	2.16973	2.03563	1.91544	9.59353	8.93885	8.57859	8.72022	8.0707	10.9075	0.445075	0.279005	0.229488	0.280522	0.366974	0.600356	0.766443	0.762368	0.41006	0.471597	0.502977	0.751587	14.0806	13.7242	12.9507	12.1685	10.4225	9.87565	10.115	11.2334	13.4889	15.2194	16.4872	1.09874	0.983361	0.890719	0.839055	0.781263	0.774602	0.784791	0.866886	1.03107	1.15362	1.24353	22.522	19.4274
12552	Cdh11	0.86413	1.00921	0.891165	0.976653	0.714185	1.19769	3.62725	3.02989	3.28499	2.78809	3.48411	3.45546	0.662084	0.703334	0.637764	0.595927	0.695016	0.635064	0.923549	1.11999	1.14531	1.11892	1.19382	1.02383	32.3386	32.3385	32.3346	32.2866	31.3867	30.5669	30.0693	29.4168	26.4387	19.1826	18.229	1.05942	1.05933	1.05693	1.03719	0.963573	0.96098	0.96087	0.960069	0.794037	0.607005	0.595683	33.3317	33.3268
12554	Cdh13	3.00063	2.56041	2.53972	2.78555	2.38065	2.22328	3.88925	3.75922	4.49721	3.91778	2.66219	3.04528	0.0754899	0.108092	0.100615	0.0666085	0.0816355	0.0656588	0.0391796	0.0391796	0.099701	0.0391796	0.0391796	0.0391796	2.38535	2.38409	2.375	2.36516	2.33199	2.28603	2.25443	2.19003	1.88835	1.6997	1.64759	0.113253	0.114279	0.12278	0.130933	0.129866	0.127718	0.126783	0.115571	0.088318	0.0804881	0.0784263	4.46591	4.46052
12566	Cdk2	1.87121	1.69322	1.62142	1.29782	1.45929	1.30714	10.6588	8.48388	8.46102	7.94838	6.75742	7.67446	0.88264	0.578968	0.710098	0.736394	0.641459	0.65408	3.3977	3.02227	2.79947	2.77068	2.84378	2.90099	20.2699	20.2243	20.0118	19.6313	18.0269	16.4872	15.3053	13.2467	13.0964	13.7737	14.5848	1.13103	1.08324	1.00178	0.926061	0.794958	0.747203	0.727859	0.714072	0.738622	0.780959	0.826521	17.9359	16.7277
12568	Cdk5	4.23109	3.28154	2.76345	2.98978	3.05761	2.97385	3.98693	3.54376	2.12419	1.67831	3.17384	5.71848	0.41067	0.138368	0.116345	0.104959	0.416492	0.293787	1.18448	0.733279	0.516175	0.365664	0.928063	0.900959	9.44348	9.38336	9.2678	9.05106	8.28366	7.8238	7.56179	7.25156	7.21548	7.21507	7.21506	0.94299	0.881832	0.851298	0.755337	0.720605	0.720469	0.720468	0.720469	0.720469	0.720469	0.720469	10.6306	9.76831
12571	Cdk6	10.2505	10.627	10.5887	12.4258	11.5233	12.3209	5.55282	6.95105	7.71596	8.51424	6.6701	5.98487	0.433936	0.638685	0.647446	0.7585	0.820516	0.70227	0.617843	0.643337	0.62	0.837553	1.04424	0.947059	17.6903	17.6916	17.6326	17.624	18.3506	20.8803	23.2206	26.0211	25.2653	22.5902	20.9011	0.489053	0.494518	0.601146	0.719605	0.799865	0.808466	0.809771	0.703639	0.592414	0.52683	0.492687	32.6307	33.0688
12576	Cdkn1b	2.34535	1.53957	1.78894	1.88366	1.5744	1.93847	13.0988	10.5571	10.5079	10.8974	10.8969	12.5157	1.97271	0.993325	1.00915	1.06446	1.14097	1.1662	6.85851	4.4469	3.78588	3.78644	4.51844	4.68088	9.81368	9.7497	9.433	8.94551	7.70498	7.13435	6.90987	6.79517	7.1226	8.2128	9.93133	2.11438	1.98566	1.75239	1.59748	1.47511	1.46222	1.46007	1.466	1.55224	1.80989	2.18789	19.6609	17.1025
12579	Cdkn2b	1.63069	1.47374	1.36797	1.68914	1.44821	1.72173	12.3533	10.6743	11.7203	10.4879	8.53768	9.35455	4.75821	4.40222	3.60547	2.84635	3.42873	3.91491	3.53692	3.12208	2.83998	2.49152	2.70489	2.51603	10.9237	10.9235	10.921	10.9091	10.3996	8.93207	8.75875	8.68066	7.96433	7.96374	7.96374	2.81792	2.81821	2.82136	2.83751	2.77569	2.83132	2.77383	2.4654	2.25192	2.25173	2.25171	37.5994	37.5994
12580	Cdkn2c	2.82181	2.05802	1.54097	2.16359	1.76008	2.24281	4.75903	3.29321	2.13846	3.14804	3.23842	2.87963	1.25484	0.474796	0.486772	0.524524	0.754454	0.548422	0.762459	0.563228	0.378439	0.485749	0.509461	0.538562	10.1727	10.1727	10.1529	9.67411	8.0978	7.02781	6.38933	5.76863	5.50703	6.34985	7.05474	1.97742	1.97741	1.91589	1.65231	1.40329	1.37519	1.37202	1.17481	1.02152	1.27797	1.31219	11.0701	11.0697
12593	Cdyl	0.457842	0.410261	0.26597	0.45665	0.261307	0.11453	0.0802378	0.0802378	0.0802378	0.114472	0.0802378	0.11651	0.198551	0.258231	0.25714	0.263101	0.301491	0.308339	0.571568	0.664842	0.5327	0.596989	0.750063	0.66345	3.85674	3.83126	3.80767	3.82725	4.04452	4.2826	4.45589	4.70919	4.75397	4.75697	4.7577	0.166588	0.157392	0.163878	0.173718	0.192604	0.199467	0.202218	0.20485	0.205403	0.205484	0.205508	4.78852	4.52818
12607	Cebpz	4.72951	6.16148	5.53105	6.04463	5.68532	6.10042	5.43271	8.50874	8.08772	9.19808	8.67527	7.89307	0.806365	1.08659	1.06759	1.04002	1.13388	1.19224	2.74206	3.07763	2.87548	3.09331	3.48976	3.15606	39.6176	39.5544	39.5893	40.3218	42.8284	44.4201	45.4076	49.1428	60.4267	60.8784	60.889	0.683552	0.75285	0.921555	1.01385	1.03156	1.03165	1.0319	0.983857	1.00033	1.00055	1.00055	38.0169	38.1406
12611	Cebpg	1.82209	1.16946	1.55856	1.5952	1.31517	1.60709	5.84637	6.37573	3.92134	5.21571	4.31227	5.72022	1.24356	1.34394	1.28797	1.35196	1.38434	1.56262	2.01348	2.09677	2.23421	1.61894	2.191	1.91543	9.21222	9.11375	8.23823	7.40772	7.0506	7.75138	8.05278	8.22682	8.23002	8.23002	8.23002	0.943807	0.943807	0.943807	0.943807	0.943807	0.943807	0.943807	0.943807	0.943807	0.943807	0.943807	16.5424	16.5424
12615	Cenpa	2.74719	2.4234	2.34584	2.9205	2.54341	2.60636	8.07325	5.52297	5.40391	5.11169	5.39415	6.20405	1.07834	1.10467	0.83645	0.884383	1.27603	1.53716	2.31576	1.91149	1.54353	1.65574	2.17749	2.33367	40.5284	40.4071	40.049	39.6264	38.6558	38.3284	38.497	41.1699	46.2641	49.0189	50.5353	3.07059	2.95983	2.87802	2.8449	2.84818	2.89811	2.96107	3.21748	3.56396	3.7451	3.8468	48.7906	46.3332
12617	Cenpc1	4.03907	3.32465	3.04283	2.85495	2.9181	2.85495	6.7262	6.28674	6.19928	6.07657	5.16724	5.72075	0.431867	0.447826	0.383531	0.405299	0.35873	0.408347	0.108474	0.0974021	0.0861249	0.0880862	0.0736853	0.12608	9.48101	9.48072	9.4737	9.41855	8.72529	8.2106	7.97751	7.80486	7.80306	7.89352	8.42399	0.531452	0.5312	0.52725	0.506475	0.44147	0.437465	0.43719	0.437148	0.437537	0.444387	0.479191	15.9451	15.9322
12626	Cetn3	6.2692	8.15728	7.95816	8.44072	7.28488	8.07761	16.0377	16.6274	17.8498	19.6543	17.7652	17.6043	0.758061	0.831763	0.77614	0.870209	1.16535	1.18494	0.643762	0.460259	0.604417	0.527172	0.609503	0.668309	49.0482	49.0482	49.0482	49.0482	49.0482	49.0482	49.0482	54.8027	60.4378	60.4562	62.8552	1.42797	1.42797	1.42797	1.42797	1.42797	1.42797	1.42797	1.7588	1.7601	1.7601	1.90321	70.2286	70.2286
12631	Cfl1	11.1903	8.94414	8.20099	8.91334	9.1111	8.19191	26.3448	26.5595	23.2003	31.2047	26.9789	27.7521	8.85863	10.6386	10.3467	10.9626	9.59148	9.57036	7.33912	7.48048	7.54517	7.57252	6.66221	5.91853	956.864	956.864	956.864	956.864	956.864	955.632	939.309	904.44	887.261	799.211	787.95	4.29968	4.29968	4.29968	4.29968	4.29968	4.07985	4.24903	4.63242	3.9752	2.99559	2.99558	521.195	521.195
12632	Cfl2	1.19623	1.27467	1.2584	1.1702	1.30434	1.32745	6.25821	5.04307	3.72325	5.01669	5.18437	3.54606	2.41528	1.77799	1.4916	1.65791	1.38256	2.08266	1.87082	1.94863	1.56557	1.75025	1.51333	1.85488	33.9112	33.7738	33.3224	32.7148	30.814	29.2486	28.0377	25.2733	23.4912	22.9981	22.805	1.93127	1.82767	1.72941	1.6683	1.57668	1.52675	1.48931	1.39548	1.32744	1.30617	1.29714	38.1964	35.4236
12633	Cflar	1.43678	1.43636	1.72215	1.51492	1.65953	1.5523	7.69277	7.3403	8.55607	7.70325	5.955	4.89935	0.473932	0.518697	0.535324	0.535771	0.282405	0.219656	0.528609	0.628618	0.561851	0.606653	0.269667	0.320917	3.30095	3.29158	3.23291	3.106	2.65031	2.41893	2.33371	2.25462	1.90555	1.52182	1.36259	0.394296	0.385721	0.360195	0.328733	0.284313	0.276395	0.274254	0.267543	0.222161	0.178847	0.161728	8.58309	8.29241
12648	Chd1	1.49221	1.37548	1.1985	1.3108	1.30057	1.47213	2.69496	2.20878	2.70931	2.16394	1.42954	2.1501	1.00772	1.16737	1.29041	1.4963	1.39494	1.43374	1.90552	2.27524	2.11666	2.51108	2.52808	2.40491	23.1503	23.1503	23.1623	23.6677	26.2831	27.3807	28.4315	29.1292	29.1493	29.1493	29.1493	1.12427	1.12431	1.13361	1.33208	1.42581	1.28886	1.28589	1.28583	1.28583	1.28583	1.28583	45.5788	45.5816
12649	Chek1	5.21423	4.58328	4.1734	4.46012	4.41526	5.0197	11.2533	11.0519	10.979	10.2737	11.7241	11.1202	0.574361	0.476721	0.479421	0.547688	0.510526	0.626497	0.637952	0.872226	0.655097	0.860323	0.78061	0.875546	10.8711	10.8449	10.7642	10.6527	10.2907	10.1969	10.1394	11.0425	12.7186	13.7667	14.5621	0.572911	0.561472	0.549704	0.540269	0.522942	0.516248	0.515461	0.53509	0.591152	0.637157	0.671941	19.5226	19.0551
12651	Chkb	2.56768	2.2481	1.7653	2.35414	2.4206	1.94595	11.123	10.3271	9.72872	10.0652	7.91999	6.85773	0.930793	0.939059	0.93251	0.683879	0.5796	0.684869	0.321191	0.431739	0.476708	0.348123	0.439944	0.330019	5.77883	5.77883	5.77883	5.77883	5.77882	5.63613	5.00389	4.75127	4.74113	4.74111	4.74111	0.716649	0.716649	0.716649	0.716649	0.716629	0.577722	0.584375	0.587958	0.587958	0.587958	0.587958	9.34302	9.34302
12660	Chka	2.91898	2.18742	2.79302	2.17191	2.9291	2.44588	13.0484	12.4091	13.7433	13.5594	11.2564	11.7884	0.635528	0.905646	1.01674	0.982068	0.644833	0.589064	1.99541	1.99823	2.5935	2.2091	2.12422	1.87045	2.85696	2.88308	2.98615	3.09423	3.25218	3.5128	3.52432	2.97856	2.79192	2.77041	2.76501	0.960418	1.0054	1.09952	1.18775	1.23325	1.10849	0.98361	0.789977	0.745873	0.740594	0.739235	14.7498	15.9145
12696	Cirbp	5.70443	5.43684	4.40838	4.70805	4.69594	3.88385	31.2266	26.8856	21.4126	26.1812	26.3408	26.5658	2.16312	1.95984	1.88312	1.62432	2.06822	2.01921	1.77438	1.21515	1.47521	1.45499	1.68692	1.54822	5.00264	4.99776	4.95509	4.84868	5.01685	5.32575	5.50049	3.78268	3.10463	3.02301	3.00994	0.596419	0.588361	0.555078	0.512515	0.466873	0.462425	0.461496	0.454747	0.422275	0.41402	0.412661	7.62765	7.40829
12702	Socs3	4.46975	3.54397	3.31622	4.12961	4.16143	4.43298	22.4526	19.0127	16.3962	19.552	17.6047	18.1712	3.07402	1.92028	2.82835	2.68808	2.24657	2.4617	2.93392	3.04479	3.01896	2.91125	2.20055	1.74907	7.17514	7.17514	7.17514	7.17514	7.15869	6.80839	6.49384	6.1506	5.79178	5.61998	5.61826	0.917111	0.917111	0.917111	0.917109	0.892408	0.786286	0.78215	0.782086	0.722903	0.718116	0.718112	8.85239	8.85239
12703	Socs1	8.17717	6.78297	7.80682	7.34101	7.2805	7.06861	13.5975	12.2225	16.0186	17.4825	12.3078	11.5051	12.5661	11.0553	13.4474	8.9959	11.1707	10.804	1.57054	3.15788	3.01913	3.67827	2.65811	1.95056	2.43068	2.4415	2.48618	2.54791	2.69792	2.7642	2.77881	2.57073	1.788	1.47296	1.38238	0.498202	0.519209	0.547914	0.564348	0.576049	0.574519	0.568804	0.506453	0.351057	0.297588	0.281964	4.46727	4.8472
12704	Cit	1.35518	0.92291	0.786107	1.11532	0.910145	0.950995	3.50868	1.31741	1.50481	2.49096	3.32545	3.23275	0.341911	0.25798	0.261619	0.219839	0.196488	0.21667	0.649441	0.401193	0.555254	0.550984	0.240747	0.367076	3.54689	3.5469	3.54735	3.55774	3.24982	2.62141	2.44993	2.4029	2.40268	2.40284	2.61061	0.122602	0.122599	0.122097	0.109992	0.0622123	0.0730681	0.096415	0.0986603	0.0986607	0.0986723	0.112018	9.40903	9.40903
12725	Clcn3	3.93115	5.14602	5.46058	6.15026	5.48331	5.84537	2.73892	3.51735	4.91085	3.87622	5.48011	5.98795	0.311138	0.313817	0.238945	0.255589	0.379927	0.41844	1.28522	1.10121	1.33327	0.792724	1.54466	1.74666	3.2261	3.22707	3.22896	3.22335	3.40313	3.63033	3.78557	4.00885	4.63621	5.21527	5.44752	0.284694	0.285444	0.293054	0.330456	0.36262	0.382037	0.39023	0.406195	0.456546	0.508332	0.5282	7.18634	7.21441
12729	Clns1a	6.53361	6.07579	5.70519	6.48965	5.96473	6.20848	4.71223	6.03134	6.63806	6.59246	6.50061	7.07885	0.54995	0.669439	0.690313	0.776763	0.811556	0.795638	0.745518	0.851761	0.996206	1.00926	1.16191	0.943455	64.1527	64.092	63.9967	64.1863	65.8077	67.0473	67.8881	71.1324	83.6491	84.5206	84.5597	0.84622	0.908515	1.03865	1.0823	1.12364	1.12387	1.12402	1.11601	1.02659	1.02674	1.02674	50.1363	50.1439
12747	Clk1	1.58635	1.33884	1.48434	1.64098	1.16722	1.57674	10.0936	8.21839	9.81686	8.18702	8.67961	10.3759	1.93143	1.58303	1.40762	1.48358	1.54499	1.61621	4.15252	5.01839	4.30256	4.38778	4.25483	4.24398	18.482	17.8666	15.9964	14.8239	14.6048	14.5683	14.558	14.5541	14.5666	15.1699	16.5966	2.60471	2.60124	2.48115	2.18707	2.08078	2.08036	2.08035	2.08035	2.08303	2.1899	2.38168	46.9536	46.7921
12778	Ackr3	1.19442	1.07878	1.08933	1.0752	1.07822	1.41558	7.98577	5.35783	5.36469	5.5505	9.75882	5.87619	1.31948	0.747396	0.936784	1.02189	1.23116	0.898405	1.45167	0.906943	0.875902	0.706556	1.12561	0.949036	5.99948	5.99533	5.97075	5.91888	5.69723	5.50827	5.35291	4.5159	3.02742	2.70447	2.63468	0.436707	0.43254	0.421985	0.410087	0.391168	0.382899	0.373045	0.299955	0.211145	0.195108	0.191305	8.00882	7.88504
12785	Cnbp	14.5631	15.2393	14.8692	17.7875	14.3183	17.5541	16.7365	20.4082	20.3093	21.2689	20.472	19.9775	4.42085	5.87132	6.21828	7.28137	7.2066	7.76811	8.41538	10.901	10.3327	12.3524	12.125	12.8824	257.815	257.832	260.498	264.862	274.923	281.392	287.619	329.438	338.465	338.727	338.734	10.7315	10.7824	12.0873	12.1925	12.1957	12.1993	13.0792	14.0997	14.0997	14.0997	14.0997	228.293	232.408
12793	Cnih1	1.36708	1.62291	1.50177	1.92789	1.55297	1.54527	5.90116	4.12443	6.4194	6.28398	5.44764	5.06635	1.12314	1.13907	1.21753	1.20436	1.16832	1.34246	2.05792	2.21382	1.80754	1.84841	1.79455	1.64095	66.5653	66.5653	66.6049	68.2182	70.0041	71.0955	72.4057	75.6911	76.7524	79.3078	84.4537	1.09108	1.09108	1.09108	1.09108	1.0914	1.09979	1.112	1.1115	1.09094	1.02087	1.03949	53.5432	53.5432
12795	Plk3	1.46388	1.11248	1.22712	1.07901	1.22395	1.24764	5.15858	5.29774	4.94122	6.96507	5.44923	4.05706	0.812388	1.02703	1.4242	1.56294	0.620629	0.536116	3.23606	3.79087	4.45403	4.07175	2.28088	2.13048	5.62449	5.62449	5.62449	5.62449	5.62447	5.46731	4.68262	4.11347	4.09927	3.13153	2.92781	0.526394	0.526394	0.526394	0.526394	0.526371	0.436983	0.383771	0.383668	0.383614	0.278517	0.273989	10.4894	10.4894
12807	Hps3	2.64456	4.42508	4.11404	4.22007	4.44744	4.06005	6.73359	8.83598	9.97702	9.48553	8.79796	8.91982	0.268336	0.383681	0.480792	0.505902	0.457315	0.575465	0.488866	0.432509	0.491406	0.559189	0.485439	0.642961	2.82808	2.81795	2.81679	2.90563	3.31561	3.47759	3.54568	3.8315	3.927	3.81339	3.79027	0.307408	0.312182	0.340383	0.386335	0.431446	0.434403	0.434753	0.434112	0.418449	0.405836	0.403523	7.22165	7.4107
12814	Col11a1	1.99316	1.15019	0.999827	1.0572	1.05233	1.17195	8.667	3.64731	3.06062	3.26935	4.03436	4.9612	0.756926	0.484789	0.501309	0.55655	0.389697	0.432461	1.2222	0.974389	1.62102	1.46022	0.646573	0.750687	28.6582	28.6476	28.5771	28.365	26.4955	23.6272	21.4235	17.9086	13.2446	10.5847	9.86593	0.523775	0.521103	0.511687	0.492066	0.276149	0.244351	0.233232	0.248909	0.222988	0.185745	0.176115	37.3106	37.0885
12816	Col12a1	2.70639	1.776	1.96428	1.97038	1.72257	2.29109	9.52969	5.63286	7.21153	6.35933	8.64297	8.23045	0.874094	0.647916	0.627764	0.582206	0.710999	0.738516	1.08161	0.879528	1.16582	1.32909	1.18431	0.938721	36.2095	36.1599	35.8726	35.2728	32.9588	31.222	30.1116	28.0355	24.1187	22.606	22.2938	0.630347	0.615806	0.579037	0.542115	0.503204	0.4973	0.494859	0.473537	0.407761	0.390973	0.387519	37.7442	36.7106
12824	Col2a1	2.82159	3.80108	4.10117	5.25879	4.29604	5.56533	7.63045	7.36492	7.63345	6.34078	13.4333	13.902	0.886939	0.772923	0.909251	0.85179	1.53686	1.47511	0.617805	0.482784	0.507758	0.426748	0.962057	1.06606	24.6873	24.6873	24.6873	24.687	24.5972	24.4382	25.2682	34.0965	35.4039	31.8614	27.6971	0.375245	0.375245	0.375258	0.375535	0.475873	0.745432	0.768628	0.590773	0.590369	0.481345	0.46005	25.3264	25.3264
12826	Col4a1	0.900483	0.940015	0.709788	1.11635	1.03568	1.18589	1.25721	1.12716	1.66317	1.54641	0.767242	1.31462	0.108439	0.120364	0.102132	0.0737898	0.103708	0.0946399	0.145553	0.108444	0.11137	0.110421	0.185868	0.0620769	10.5398	10.5398	10.5398	10.5398	10.5347	10.4125	10.2478	9.95655	9.19466	7.29112	7.09503	0.0819794	0.0819794	0.0819794	0.0819783	0.0814254	0.0854017	0.0857716	0.0590048	0.0497477	0.0424691	0.0423639	8.0365	8.0365
12827	Col4a2	0.903825	0.941772	0.708985	1.11644	1.03655	1.1894	0.914538	0.956661	1.32656	0.663927	0.526996	1.3699	0.106286	0.153012	0.132726	0.0741991	0.123655	0.0725923	0.0391796	0.225693	0.16744	0.169517	0.201866	0.0907218	5.89511	5.89511	5.89511	5.89511	5.895	5.88723	5.82888	5.67032	4.97587	3.79554	3.72357	0.0549386	0.0549386	0.0549386	0.0549386	0.0549279	0.0542894	0.0527447	0.0525139	0.0403292	0.0347264	0.0346764	5.13051	5.13051
12830	Col4a5	0.805383	0.99663	1.01102	1.03588	0.845272	1.15654	2.56061	1.39086	1.39169	1.12351	1.4788	1.94139	0.0831464	0.0508869	0.0471798	0.0782442	0.0491482	0.0648293	0.111134	0.0566835	0.0899841	0.113841	0.0391796	0.0433295	9.90756	9.90756	9.90756	9.90756	9.86663	9.17815	8.63742	7.71965	7.45554	7.46197	8.21938	0.132014	0.132014	0.132014	0.132014	0.104051	0.0872744	0.0872498	0.0872498	0.109752	0.125272	0.150567	7.49106	7.49106
12831	Col5a1	4.49192	3.50755	3.36747	3.83214	4.04043	3.86305	17.0726	15.498	15.5414	15.8344	13.8311	11.1999	2.6424	2.74952	2.96326	2.56952	2.488	1.75633	3.49367	3.72392	3.81955	3.37325	3.73977	2.44545	39.558	39.558	39.558	39.558	39.296	35.738	33.7801	32.167	26.1141	16.0233	15.9659	1.35512	1.35512	1.35512	1.35512	1.26806	1.21631	1.24446	0.951571	0.632357	0.473766	0.473655	61.6469	61.6469
12832	Col5a2	2.25988	2.36061	2.09458	2.25719	1.79301	2.32408	18.5352	16.2976	12.3609	15.0599	17.784	17.4536	2.55022	2.14252	2.04518	2.0106	2.45746	2.3426	2.49497	2.48005	2.24941	2.81132	2.50637	2.27386	340.037	340.037	340.037	340.037	338.528	323.078	311.362	291.701	269.482	223.372	220.774	3.44319	3.44319	3.44319	3.44318	3.16481	2.89932	2.89902	2.89902	2.414	2.2343	2.23425	260.856	260.856
12833	Col6a1	1.00984	0.996177	0.722675	0.80935	1.05571	0.830403	2.34696	1.1299	1.78641	1.04239	1.85031	1.82977	0.954089	0.379188	0.387398	0.217784	0.465427	0.383878	2.91477	2.03715	1.20398	0.863627	1.59455	1.63928	56.9558	56.9558	57.0689	57.1386	56.3915	52.6512	50.0391	45.5668	36.7873	36.521	36.5211	0.753417	0.753415	0.637962	0.540705	0.468656	0.431393	0.431243	0.40262	0.444898	0.621614	0.621614	51.1322	51.1322
12834	Col6a2	0.556521	0.296594	0.276086	0.348268	0.325273	0.204803	1.74171	1.00143	0.894934	0.798432	0.86121	1.15978	0.312946	0.242983	0.198709	0.105899	0.223796	0.199785	1.36547	1.10863	1.1841	0.687931	1.32013	0.499906	4.07136	4.07132	4.06796	4.01825	3.65865	3.45145	3.34541	2.983	2.66493	2.66265	2.66264	0.114194	0.114166	0.112577	0.100366	0.090807	0.090764	0.0907092	0.0775338	0.0746838	0.0746818	0.0746817	5.49287	5.49069
12836	Col7a1	1.87487	1.95569	1.66508	1.66912	1.5414	1.67661	2.4	2.47051	1.98498	2.38263	2.25086	2.38014	0.346741	0.402209	0.354736	0.257229	0.345645	0.247459	0.539064	0.571666	0.377517	0.394145	0.430083	0.314321	4.6486	4.64797	4.64417	4.63364	4.53776	4.38759	4.26136	3.84466	2.51814	1.92685	1.76255	0.261711	0.26144	0.260554	0.258759	0.248969	0.240292	0.234889	0.210052	0.135789	0.106814	0.0987278	11.2721	11.2572
12837	Col8a1	1.30008	1.06898	0.895481	1.16836	1.1416	1.06606	3.71722	3.77804	3.36365	4.08109	3.29553	3.28805	0.34278	0.456938	0.380928	0.404565	0.230903	0.274962	0.474037	0.523333	0.593226	0.606259	0.286007	0.491691	13.7887	13.6762	13.4554	13.2516	12.9087	12.643	12.5031	12.1167	9.85293	7.53896	6.52808	0.612323	0.568344	0.555897	0.552992	0.469158	0.459382	0.468766	0.45196	0.354258	0.275332	0.243595	19.3412	17.7993
12843	Col1a2	3.82629	3.17381	3.09465	3.18229	2.63497	3.10459	34.6472	23.394	19.1636	22.3751	28.8491	26.9514	11.7461	7.00952	6.46474	6.45169	8.53117	7.95033	12.3277	8.11533	7.15839	7.20779	9.6615	8.53192	210.605	208.975	208.726	211.351	210.232	205.689	201.714	188.87	151.645	125.793	115.387	9.287	8.69753	7.85549	7.25144	6.59425	6.43798	6.35697	5.93605	4.66842	3.97676	3.71224	309.852	285.076
12847	Copa	1.35962	1.46067	0.993016	1.48959	1.26169	1.24735	9.10665	7.21485	7.96082	7.36676	7.38767	7.889	0.962523	0.869837	0.788074	0.759345	0.665156	0.600712	1.7864	1.84212	1.70417	1.52981	1.36343	0.90664	30.7207	30.6305	30.2224	29.8399	29.4079	28.4833	27.5314	25.1929	24.1597	24.0104	23.9667	1.10648	1.05777	0.99899	0.950224	0.859396	0.815806	0.792729	0.761182	0.749925	0.747386	0.74641	30.4686	28.7569
12859	Cox5b	1.33034	0.802841	0.671106	0.844947	0.816533	0.827831	2.574	3.19856	3.5282	2.93526	2.96915	3.64282	0.321754	0.634421	0.579266	0.741809	1.10627	0.676943	1.48731	1.594	1.8911	1.82697	2.02828	2.42881	103.803	103.802	103.556	101.632	96.052	92.2092	90.8611	96.261	97.9502	98.0389	98.0436	1.32892	1.32858	1.21677	1.07251	1.069	1.07377	1.19856	1.25519	1.25519	1.25519	1.25519	76.4507	76.4148
12870	Cp	1.33164	1.04112	1.22752	1.11495	1.11146	1.19888	0.889346	1.04047	0.814122	0.510337	0.800589	0.752635	0.257984	0.26066	0.291581	0.333764	0.27872	0.295129	0.208672	0.310197	0.559129	0.705176	0.557288	0.570898	3.35785	3.35785	3.35785	3.35785	3.34998	3.15464	3.03376	2.95207	2.61117	2.5745	2.53468	0.251128	0.251128	0.251128	0.251128	0.245405	0.220761	0.220618	0.220617	0.220617	0.222225	0.282346	6.00534	6.00534
12876	Cpe	1.94437	2.39309	2.41528	2.85557	2.23657	2.48514	7.99841	5.89907	7.01572	5.9834	5.50203	6.082	0.676645	0.646229	0.637668	0.654301	0.55192	0.51797	0.659888	0.806693	0.728512	0.714983	0.814593	0.807533	175.594	174.255	172.794	171.523	168.626	166.725	165.476	163.532	153.728	138.666	137.741	0.614983	0.571272	0.571197	0.571196	0.571196	0.571196	0.571196	0.571155	0.506953	0.482477	0.48228	147.846	137.335
12894	Cpt1a	2.11365	1.71606	1.96612	1.96623	1.7479	1.85334	3.10995	3.50027	2.90222	2.54756	2.21749	2.33772	0.253377	0.192039	0.186117	0.168281	0.177634	0.147845	0.427376	0.262151	0.248277	0.257897	0.253177	0.210888	5.78602	5.77861	5.75145	5.70332	5.45422	5.12179	4.7871	3.93292	3.71531	4.01524	4.44943	0.0949704	0.0932584	0.090827	0.0880845	0.0798192	0.0731975	0.0685076	0.060867	0.0616486	0.0674415	0.0748775	6.00928	5.88782
12896	Cpt2	1.57587	0.933321	1.08612	1.02024	1.19872	0.961345	6.96507	7.24971	7.05031	6.25246	6.00821	5.78525	0.301261	0.266076	0.193547	0.231935	0.22912	0.266824	0.429857	0.544801	0.407761	0.189376	0.367757	0.451346	4.60149	4.59323	4.50046	4.40314	4.15894	3.99522	3.90463	3.76923	3.74165	3.74131	4.06565	0.0894563	0.080944	0.0592313	0.0527735	0.0629636	0.0838846	0.0844424	0.0844588	0.0844588	0.0844948	0.100079	4.02797	3.44437
12909	Crcp	3.00501	3.03649	3.43109	3.11459	2.89501	3.06459	10.162	9.87073	9.17191	9.28699	8.53912	8.09004	0.42175	0.440756	0.406387	0.388816	0.423017	0.369447	0.81864	0.713842	0.866457	0.809301	0.801556	0.689319	23.8467	23.8467	23.8467	23.8467	23.8467	23.8119	23.8413	24.4858	27.8047	27.8918	28.2382	0.256095	0.256095	0.256095	0.256095	0.256098	0.293653	0.282676	0.272804	0.284195	0.284203	0.293236	22.1615	22.1615
12912	Creb1	3.08662	3.84547	4.16593	4.64166	3.98475	3.98919	9.81026	9.51283	10.1722	10.2031	8.74132	8.08241	0.527656	0.534518	0.479943	0.480716	0.415326	0.473431	0.8582	0.945677	0.968174	0.917022	0.904712	0.992371	8.0393	8.0294	7.61425	7.03349	7.04394	7.03732	7.03681	7.28292	7.74179	7.76757	7.76927	0.423858	0.417378	0.388109	0.359672	0.343595	0.343068	0.343926	0.364188	0.378688	0.379179	0.379225	11.0592	10.79
12913	Creb3	3.04303	3.08404	2.98512	2.86599	3.02407	2.62705	5.35283	5.05741	4.23243	4.24265	3.60462	2.85912	0.717937	0.862338	0.670945	0.577349	0.806555	0.632529	1.40109	0.987212	0.917721	0.706288	0.748778	0.676821	22.6188	22.6184	22.5647	22.1769	20.7949	19.8222	19.0797	14.9689	13.3465	13.2605	13.256	0.527287	0.52677	0.490645	0.420473	0.411201	0.410537	0.396388	0.309188	0.309015	0.309015	0.309015	16.6205	16.5866
12916	Crem	2.09625	1.9852	1.90602	2.2474	2.22309	2.02213	6.32254	4.97057	5.34849	5.25965	3.72405	4.8534	0.112041	0.0951676	0.0977055	0.106911	0.0846969	0.0924788	0.0667955	0.170399	0.18024	0.125178	0.0466662	0.0391796	1.28505	1.28502	1.27958	1.25308	1.13992	1.01718	0.8652	0.698714	0.693787	0.693782	0.693782	0.0812083	0.0811598	0.0760256	0.0710575	0.057369	0.056936	0.0569344	0.0569343	0.0569343	0.0569343	0.0569343	1.7915	1.78848
12927	Bcar1	2.6349	2.91668	2.91543	2.9189	3.10421	3.01056	4.80877	3.91577	4.40385	4.25008	2.20111	3.45703	2.31915	2.93349	3.69833	3.84514	2.59428	2.32866	3.24428	3.70215	5.17846	5.48833	3.49093	3.73382	25.2719	25.2723	25.5752	26.1963	27.3041	27.7649	27.9566	28.089	23.8727	15.9557	15.9407	1.7532	1.75427	1.92757	1.94858	1.94892	1.94892	1.94892	1.94892	1.38236	1.10588	1.10586	44.3419	44.4398
12928	Crk	2.22698	2.26441	2.52406	2.31947	2.52094	1.99205	12.3471	11.6014	8.65864	11.4357	10.0429	10.613	1.61914	1.81777	1.80274	1.88064	1.47637	1.70834	2.64304	2.67215	2.73382	2.41463	2.3218	2.36804	50.8335	50.8335	50.7725	50.0995	47.9715	46.587	45.6906	44.3334	43.4528	40.1122	39.9231	1.75221	1.75209	1.68086	1.52693	1.51818	1.51818	1.51818	1.51818	1.45635	1.37603	1.37592	44.1932	44.1845
12929	Crkl	2.4575	2.14098	2.19943	2.44667	2.28115	2.359	8.49132	5.95731	6.77367	6.23783	6.44444	5.50672	0.641911	0.47924	0.389417	0.472004	0.482407	0.544744	1.3912	0.957101	0.745062	0.532886	0.85709	0.964492	11.5639	11.4601	11.1369	10.7135	9.51836	8.75748	8.35696	8.25775	9.22236	9.87881	10.2276	0.53631	0.487933	0.442369	0.413792	0.379304	0.371162	0.370683	0.389061	0.434524	0.461875	0.476317	17.0364	15.1717
12931	Crlf1	1.40726	1.55303	1.04027	1.40946	1.29815	1.41403	3.11994	3.38104	2.8797	2.11455	1.57768	2.02573	1.09339	1.46456	1.21559	0.903383	1.09529	0.890154	7.34064	6.75835	6.41837	6.83107	7.34611	7.14874	8.13879	8.03936	7.86894	7.72154	7.41362	7.23375	7.18926	7.04033	5.68965	4.786	4.76616	0.519191	0.454919	0.447474	0.447076	0.447054	0.452204	0.420049	0.301644	0.218493	0.205271	0.205193	9.19405	7.91924
12934	Dpysl2	3.53532	3.73419	3.33245	3.38274	3.31492	3.33901	3.60207	3.45173	2.59321	2.75148	2.74617	4.08209	0.613951	0.46087	0.396919	0.251382	0.292458	0.290506	1.00086	0.86607	1.03781	0.749164	0.611997	0.453116	31.2228	31.1609	30.9596	30.7013	29.4506	28.1068	26.8737	23.1296	19.0563	17.4069	16.6791	0.3171	0.305394	0.292719	0.227923	0.184646	0.1763	0.170051	0.151298	0.167503	0.20085	0.194457	23.0577	22.1272
12952	Cry1	3.50245	2.84395	3.2354	3.24718	3.16068	2.79442	3.09899	3.88493	5.43659	5.46707	4.01564	3.32178	0.168622	0.202072	0.187481	0.225726	0.284066	0.179306	1.09083	0.875525	0.78253	0.855329	0.838304	0.838619	4.3472	4.34809	4.34135	4.51196	5.51323	6.15824	6.49843	6.32386	5.52304	5.50793	5.50768	0.124269	0.124868	0.172195	0.229397	0.265633	0.233426	0.18634	0.161919	0.150513	0.150455	0.150453	5.51648	5.55467
12955	Cryab	1.43634	0.969951	0.788245	0.798249	0.824217	0.893674	0.268744	0.218105	0.182579	0.0893039	0.372042	0.166957	1.50126	0.530859	0.539477	0.361685	0.586274	0.397897	0.352205	0.110871	0.0391796	0.255439	0.130566	0.233216	25.014	25.014	25.014	25.014	24.9946	23.5082	22.2871	20.0785	18.5857	11.6928	11.2125	0.162329	0.162329	0.162329	0.162329	0.156586	0.125536	0.125535	0.125535	0.0955772	0.0725568	0.0725568	17.3636	17.3636
12977	Csf1	3.67671	2.70451	2.95772	3.45834	3.34697	3.67274	17.3048	12.6006	16.5604	17.2961	14.6933	13.1138	5.27021	4.54023	5.74246	6.50707	4.86584	3.61764	7.57617	7.31675	7.3171	9.25065	6.99527	5.73854	68.5991	68.3223	67.503	66.6108	64.7184	63.7507	63.1774	60.0815	43.8785	34.0771	31.0711	7.08171	6.80468	6.60755	6.54337	6.50668	6.48881	6.45663	6.03068	4.27407	3.43272	3.1813	107.563	101.539
13000	Csnk2a2	1.22497	1.33569	1.34198	1.55006	1.38194	1.30253	1.20242	0.970363	1.21646	1.06844	1.0052	1.56189	0.934031	1.19605	1.1104	1.19737	1.32549	1.44535	0.698866	1.03872	0.712174	0.801511	1.15011	1.09821	7.2195	7.22027	7.23835	7.32488	7.69183	7.84436	7.90535	8.62191	8.92344	8.92519	8.92525	1.67756	1.67965	1.70807	1.77472	1.83622	1.83929	1.84744	2.03957	2.07368	2.07391	2.07392	17.1882	17.2547
13007	Csrp1	2.1743	1.59847	2.07411	1.32925	1.6186	1.38032	6.76976	6.02638	7.39564	5.93932	4.835	3.14724	1.45691	1.46463	1.63541	1.41595	0.924901	0.605865	1.0182	1.13009	1.64558	1.23719	0.519567	0.580087	87.6019	87.4834	87.1253	86.5861	84.4141	81.4719	78.2295	64.5649	43.049	31.142	24.7769	0.599947	0.579389	0.560147	0.542865	0.333064	0.312749	0.294342	0.233052	0.158861	0.121992	0.128151	45.1556	43.4823
13008	Csrp2	5.30039	4.22638	4.37545	4.57553	3.72337	4.20161	13.487	12.3175	11.241	12.3136	12.939	12.759	1.86122	1.54769	1.43078	1.2144	1.56343	1.53915	2.77223	2.16909	2.3769	1.77969	2.33641	2.61444	64.257	64.257	64.257	64.2569	63.772	60.2514	57.7099	53.8414	50.875	41.7389	41.2593	0.880536	0.880536	0.880536	0.880525	0.79127	0.726545	0.726369	0.726367	0.642841	0.565266	0.565173	55.5432	55.5432
13014	Cstb	2.07827	1.58253	1.60301	1.88495	1.66505	1.80626	8.58157	7.55901	8.05341	7.53708	5.51269	7.17692	1.55551	1.41171	0.870579	1.42738	1.34461	0.27826	0.960773	1.41216	0.942335	0.828441	1.07028	0.884048	106.933	106.933	106.933	106.933	106.933	106.135	101.641	94.0058	92.0633	79.5795	77.2693	0.676428	0.676428	0.676428	0.676428	0.676427	0.59996	0.581818	0.581817	0.581699	0.48813	0.488109	83.4493	83.4493
13025	Ctla2b	0.527775	0.659804	0.56196	0.335073	0.54644	0.424518	1.15986	1.41494	1.22188	0.563052	0.572857	0.487214	0.015954	0.741398	0.368439	0.549416	0.303109	0.0902361	0.181937	0.201649	0.252792	0.157632	0.227696	0.0701732	2.29046	2.29046	2.28979	2.26806	2.02049	1.88273	1.81828	1.76433	1.3578	0.837176	0.82881	0.177507	0.177501	0.17655	0.159129	0.136571	0.136528	0.136529	0.136512	0.0878778	0.0643837	0.0642257	3.48264	3.48231
13026	Pcyt1a	2.10529	1.94021	1.85949	2.05671	2.25657	1.99324	4.89734	3.5238	3.37235	3.71851	2.68066	2.4476	0.190142	0.160804	0.160607	0.147676	0.121671	0.130674	0.64157	0.677224	0.676782	0.684409	0.365398	0.309826	11.653	11.6527	11.602	11.4191	10.946	10.4775	9.6365	7.95972	7.48744	7.46275	7.46146	0.112744	0.112593	0.100699	0.0957761	0.0955115	0.082301	0.0725276	0.0721902	0.0721902	0.0721902	0.0721902	8.59783	8.5801
13033	Ctsd	2.63602	2.28848	2.24434	2.3976	2.33669	2.57392	5.70155	4.37317	5.17492	4.0688	3.9444	3.45743	1.10671	1.14626	1.06353	1.12236	0.849436	0.871159	1.71869	1.75653	1.46312	1.41287	1.72727	1.39577	241.657	241.657	241.657	241.657	241.415	237.032	233.017	223.875	215.466	194.919	191.422	1.10767	1.10767	1.10767	1.10767	1.07055	1.00023	1.00014	1.00014	0.923862	0.874664	0.874651	115.911	115.911
13041	Ctsw	1.16045	0.512703	0.520134	0.50856	0.562734	0.524719	1.94959	2.88406	2.60466	2.4385	1.75006	2.56476	2.249	2.82996	2.70486	3.28162	2.87612	1.97105	1.15688	1.52975	1.42972	1.15695	1.30703	0.981218	3.06515	3.06515	3.06515	3.06515	3.06511	3.06486	3.06386	3.02674	2.6882	2.36978	2.29175	0.666319	0.666319	0.666319	0.666318	0.666297	0.666176	0.665768	0.654709	0.57495	0.511995	0.497529	8.19684	8.19684
13043	Cttn	3.52078	2.99515	2.70456	2.92929	3.00435	2.4441	12.6248	10.5476	11.0579	10.1948	8.563	7.22798	1.70932	1.49116	1.55462	1.409	1.07504	1.06267	1.69628	1.45802	1.47128	1.4826	1.32731	0.962958	91.0259	90.5648	89.887	89.6699	87.6688	84.9195	82.1445	73.4372	64.1609	58.9596	55.3713	1.41115	1.32053	1.26189	1.222	1.14761	1.10103	1.06637	0.975624	0.873326	0.809487	0.763684	89.9181	83.7001
13047	Cux1	3.73575	3.2379	3.42247	3.72418	3.3182	3.68442	5.55594	4.38266	3.28132	4.20099	4.28668	4.62861	0.711448	0.691397	0.708833	0.683093	0.629071	0.5951	1.04071	1.74907	1.90566	2.06189	1.62887	1.87044	8.79312	8.79312	8.79312	8.79312	8.79312	8.66428	8.21218	7.95323	7.94884	7.6626	7.2818	0.485272	0.485272	0.485272	0.485272	0.485271	0.446366	0.438679	0.438678	0.438678	0.412148	0.40185	18.0026	18.0026
13052	Cxadr	0.820457	0.492682	0.895239	0.385567	0.554847	0.713474	1.44348	0.990211	1.30528	0.619829	0.358252	0.306171	0.38177	0.399063	0.371737	0.401703	0.344335	0.375149	0.705296	0.84155	1.08069	1.15729	0.953003	0.822443	4.87538	4.87538	4.87537	4.87532	4.8297	4.56852	4.40645	3.77121	3.2664	3.27774	3.27876	0.256336	0.256336	0.256334	0.256298	0.240438	0.223565	0.228557	0.238218	0.238227	0.238227	0.238227	6.88979	6.88979
13078	Cyp1b1	6.51618	5.43564	5.37242	6.05213	6.09416	6.32409	32.2909	21.3427	20.7164	23.3256	27.6541	18.1266	10.7262	6.77966	7.50815	8.30157	8.08683	5.22738	9.28814	6.93727	7.29634	7.57489	7.28034	4.19493	145.044	144.25	140.672	136.699	128.497	124.005	120.186	99.2148	94.6213	94.5823	94.5816	9.64482	8.88954	8.11254	7.98665	7.96066	7.8839	7.54006	6.33297	6.28963	6.2893	6.28928	193.157	170.31
13110	Cyp2j6	0.789201	1.16701	0.814079	1.02161	0.854664	0.984054	3.49977	3.44758	3.15206	3.0645	4.11912	4.03379	0.0767545	0.0768989	0.0445149	0.03703	0.056944	0.0601973	0.130875	0.0748306	0.0391796	0.0773939	0.0391796	0.0391796	2.39009	2.36433	2.3892	2.41131	2.46287	2.30077	2.17516	1.98413	1.94427	1.94616	2.02265	0.0589791	0.0444289	0.0442262	0.0442243	0.0442242	0.0442242	0.0442242	0.0442242	0.044226	0.0443762	0.0474182	2.24073	1.68165
13121	Cyp51	4.18104	3.72281	3.78629	4.35503	4.00474	4.0763	11.953	9.26325	12.236	11.3375	10.4784	11.2018	1.33346	1.4445	1.41008	1.41541	1.53204	1.41734	2.82983	3.17667	3.25583	3.21446	3.8651	3.45875	59.1381	59.1381	59.1338	59.1044	62.9181	65.7595	67.6557	70.7049	71.4564	59.992	59.0607	0.996567	0.996575	1.00105	1.03878	1.25477	1.25477	1.25477	1.25425	1.09166	0.901352	0.901352	47.8455	47.8455
13144	Dapk3	4.40554	5.03525	5.24838	5.16395	4.95205	5.36981	16.538	18.4852	14.3588	18.1087	18.6522	19.8882	0.982306	0.925978	1.02413	0.892017	0.945865	0.887001	2.01473	2.15494	1.97208	1.82369	1.83966	1.67928	7.72473	7.70552	7.38899	5.97571	6.3683	6.51563	6.54374	6.48598	6.65997	6.93412	7.17277	0.698979	0.672354	0.636593	0.60862	0.561605	0.541179	0.531512	0.526404	0.546889	0.568948	0.587326	8.0621	7.53002
13163	Daxx	4.60026	4.79373	4.52157	4.73683	4.6749	4.28557	5.23384	5.1656	6.31354	4.87435	5.23546	4.3828	0.718269	0.444691	0.586248	0.54332	0.675993	0.690919	2.951	2.00688	1.77887	1.69339	2.06028	1.91007	9.2234	9.22339	9.22316	9.22108	9.06608	8.45633	8.11524	8.72499	8.94982	8.95556	8.9557	0.401509	0.401499	0.40133	0.400133	0.355655	0.312931	0.346693	0.389234	0.389851	0.389855	0.389856	8.69988	8.69944
13169	Dbnl	2.99661	2.7807	3.00093	3.25924	2.75183	2.26779	8.86095	9.18064	10.0798	10.9896	8.07554	9.15674	0.954133	0.793881	0.881923	0.994301	0.894476	0.882202	3.16593	2.92464	2.59819	2.42771	2.74024	2.66163	25.2637	25.0436	24.7754	24.5532	24.0937	23.6632	22.2689	20.467	20.2691	20.2672	20.2671	0.984976	0.917245	0.916373	0.916367	0.916354	0.846378	0.79027	0.790171	0.790171	0.790171	0.790171	29.1103	27.0826
13170	Dbp	6.8127	8.20682	8.17521	8.59381	7.81915	7.78003	1.34414	2.11081	2.79422	3.32332	4.48711	3.35451	4.23936	5.39831	5.84847	5.89398	7.19512	6.79027	1.98571	1.5859	1.62912	1.58258	2.32709	2.43412	0.149946	0.150019	0.155259	0.166993	0.153694	0.408897	0.544685	0.733727	0.750915	0.750964	0.750964	0.345911	0.347907	0.389705	0.428872	0.493156	0.518224	0.545303	0.60071	0.602062	0.602062	0.602062	0.662256	0.751884
13178	Dck	1.72067	1.81097	1.87827	1.63085	1.72402	1.85046	8.60713	9.91677	7.8767	7.88632	8.14177	10.092	0.632865	0.532581	0.436355	0.499851	0.514232	0.511098	0.999539	1.06714	0.782292	0.731173	0.605552	0.793249	14.5346	14.5257	14.4824	14.3919	13.8933	13.3329	12.9023	12.4223	13.8772	16.0128	17.5749	0.391615	0.388012	0.380546	0.37088	0.345805	0.33439	0.33043	0.336768	0.386879	0.443266	0.480856	16.0124	15.8305
13191	Dctn1	1.57669	1.29656	1.28327	1.91954	1.24875	1.34675	3.14797	3.3636	1.93123	1.91935	1.75095	2.96132	0.395589	0.187525	0.244163	0.165711	0.298936	0.299121	0.849655	0.484458	0.599353	0.409959	0.671568	0.49932	7.63132	7.63132	7.63131	7.63113	7.46565	6.80734	6.47678	6.25281	6.10905	5.71779	5.70713	0.175794	0.175794	0.175793	0.175747	0.156435	0.144117	0.1439	0.143891	0.138701	0.131563	0.131467	13.6659	13.6659
13196	Asap1	8.96128	9.38512	9.29799	10.7636	8.81333	10.1353	15.3685	12.6431	9.99137	14.2543	12.3136	10.888	1.97391	2.17156	2.20453	2.22383	1.95795	1.82862	2.31625	2.34883	2.31778	2.3216	2.7262	2.18045	25.034	25.0626	25.8553	27.3072	28.6366	28.9099	28.9878	28.9836	25.2906	20.8188	21.5754	1.74021	1.74021	1.74021	1.74021	1.74021	1.7402	1.74017	1.73642	1.46803	1.24361	1.30481	71.9169	71.9169
13197	Gadd45a	4.3815	3.99022	3.57723	3.77731	3.59474	3.48092	13.9511	14.6038	13.6838	10.818	11.9687	12.0973	5.63149	6.3316	7.14086	5.29826	4.62787	3.55908	2.91948	3.82523	3.6929	3.10116	2.6441	1.76579	6.30467	6.30505	6.30854	6.31696	6.15438	5.4355	4.74221	4.08598	4.05912	4.05862	4.05857	1.17416	1.1748	1.17785	1.18021	1.07335	0.886564	0.801304	0.757901	0.755932	0.755864	0.755856	15.252	15.2698
13198	Ddit3	7.02489	4.96403	5.11749	5.10512	4.88028	4.65094	27.481	24.0876	20.5961	23.3868	24.1568	26.7182	6.00258	5.82433	5.10389	4.25178	4.80763	4.70036	3.5746	3.15627	3.45171	2.97817	2.67525	2.60504	12.1125	12.0633	11.8175	11.382	9.84191	8.86974	8.49446	8.98935	9.80911	9.99127	10.0486	2.67084	2.56607	2.35801	2.15985	1.85925	1.80823	1.83485	2.0266	2.17278	2.20578	2.21678	22.8753	20.8908
13200	Ddost	4.04491	3.05019	3.09379	3.0632	2.8881	3.57098	7.95898	8.23613	8.25162	8.12518	7.39791	6.99452	0.779279	0.819453	0.641225	0.503629	0.627738	0.724582	1.25264	1.33433	1.32704	0.957458	1.64945	1.72167	116.722	116.722	116.722	116.722	116.722	115.418	114.123	113.454	113.104	113.054	113.047	0.489712	0.489712	0.489712	0.489712	0.489701	0.399478	0.474203	0.474287	0.474287	0.474287	0.474287	56.5927	56.5927
13202	Ddt	1.25647	0.921516	0.74089	0.861851	0.550104	0.801603	2.83718	1.93037	2.27663	2.05946	2.0367	1.79848	0.246649	0.250486	0.00480178	0.38583	0.00480178	0.181189	0.285577	0.275317	0.100984	0.0996516	0.313902	0.213022	19.7213	19.4982	19.1823	18.9063	18.2747	17.8578	17.5828	17.1499	16.2104	13.6869	13.4484	0.27242	0.236043	0.235511	0.235506	0.235505	0.235505	0.235505	0.235488	0.209698	0.185998	0.185615	16.3928	14.1861
13204	Dhx15	4.09338	4.40327	4.92995	5.58503	4.73128	4.95235	8.26143	8.85324	6.10324	9.67064	8.29391	8.6435	1.66363	1.88992	1.94351	2.27561	2.09744	2.32002	1.66185	2.01732	2.09827	2.49101	2.13077	2.45916	64.8402	64.8402	64.9305	65.779	67.7053	68.6123	69.0389	70.7729	78.2717	78.2967	78.2968	2.27558	2.27562	2.34257	2.43511	2.43623	2.43623	2.43623	2.59895	2.74784	2.74784	2.74784	97.8007	97.8054
13209	Ddx6	2.50485	2.20493	2.38188	2.97575	2.14751	2.49582	5.09136	4.53775	5.06276	4.90647	4.36594	4.85361	1.81415	1.4158	1.24404	1.3369	1.3122	1.38652	3.06539	2.55156	2.30441	2.17133	2.1634	2.4147	28.7527	28.7251	28.5152	27.9832	25.7978	24.373	23.6337	22.9524	23.0237	23.7054	25.6823	1.09329	1.07907	1.02634	0.95774	0.881609	0.87312	0.871623	0.871277	0.877313	0.909394	0.994734	41.5337	40.8051
13244	Degs1	3.4911	2.95963	3.39385	3.90931	3.11992	3.29228	9.13838	10.4598	9.63008	10.5803	9.48931	10.5919	0.831956	1.11859	1.17263	1.16498	1.25225	1.15243	0.750064	1.27689	1.2885	1.04487	1.28729	1.1481	60.9468	60.8703	60.8588	60.993	63.0477	64.7796	66.0548	68.9048	74.9716	75.6563	75.6997	0.858113	0.93891	0.965781	1.02556	1.10976	1.10934	1.10734	1.10806	1.03975	0.96474	0.940134	37.4819	37.4833
13340	Slc29a2	5.55756	5.38316	5.15612	5.47827	5.38487	5.26753	6.02433	7.80006	8.49487	8.02473	7.2091	10.1459	0.5744	0.976917	0.88994	0.819446	0.883821	1.2874	0.705679	1.26652	1.1865	1.423	1.57645	1.68635	4.02573	3.95022	4.13308	4.59393	5.27102	6.9529	7.55459	7.88091	7.88619	7.88619	7.88619	0.676354	0.642092	0.871671	1.04255	1.13078	1.13502	1.13554	1.13571	1.13571	1.13571	1.13571	9.76015	10.053
13345	Twist2	3.3562	4.86235	4.95639	5.2413	5.44046	5.23923	5.89989	7.77975	9.03977	10.347	6.82119	8.13608	0.487587	0.93805	1.23629	1.24794	0.888427	0.902287	0.475177	0.58387	1.26906	1.51771	1.15665	1.06372	9.96944	9.70587	8.8703	8.86323	11.0119	14.2683	16.0017	18.31	18.8492	18.8701	18.8709	0.486314	0.489961	0.688649	0.869935	0.888274	0.846332	0.784968	0.779671	0.77967	0.77967	0.77967	9.56324	9.76659
13347	Dffa	0.656604	0.93225	0.749933	0.928715	0.78719	0.763764	2.67977	2.04345	1.91177	2.26015	2.01434	2.64193	0.218042	0.184329	0.137219	0.136757	0.203669	0.19404	0.440272	0.335216	0.355914	0.254643	0.403172	0.596165	3.55262	3.55169	3.54637	3.53334	3.43855	3.30904	3.21448	3.3561	4.04057	4.23864	4.29077	0.148808	0.148221	0.14667	0.144166	0.134914	0.129982	0.129905	0.147864	0.172634	0.178356	0.17998	4.1339	4.11124
13350	Dgat1	2.58378	2.0002	2.16335	1.58834	2.01264	1.8687	10.8001	12.4609	10.3086	9.24214	10.4825	8.44622	2.71017	3.45352	3.7352	4.20133	3.90321	3.31737	2.80409	2.44302	2.84656	2.46321	3.06737	2.73542	9.41084	9.41084	9.41084	9.41083	9.26307	8.82335	8.63235	8.50737	8.14357	7.44483	7.44342	1.43838	1.43838	1.43838	1.43837	1.32746	1.29987	1.29978	1.29978	1.19718	1.13768	1.13767	17.1669	17.1669
13358	Slc25a1	4.07069	2.7076	2.97019	2.97664	2.97144	2.79981	5.04593	3.51415	5.01142	3.43428	3.40974	3.39862	0.85099	0.754049	0.888996	0.537479	0.916001	1.00979	3.67652	3.44477	3.30248	3.19686	4.09438	3.75179	17.0549	17.0549	17.0549	17.0548	16.929	16.5719	16.252	15.4289	14.6848	12.6345	12.2781	0.296226	0.296226	0.296227	0.296304	0.399607	0.422468	0.33177	0.273142	0.251698	0.22227	0.22162	11.0353	11.0353
13360	Dhcr7	1.16604	0.930142	0.855523	0.539278	0.836315	0.68904	3.21832	1.77444	2.0221	1.51496	2.05229	2.37807	0.681319	0.631365	0.633642	0.532465	0.735036	0.767323	0.14877	0.132411	0.255422	0.270109	0.277799	0.258046	8.33941	8.33941	8.33905	8.32358	8.36244	8.7982	9.09975	11.8071	12.1983	12.2042	12.2043	0.19442	0.194421	0.194786	0.211108	0.262726	0.271226	0.285991	0.275366	0.246619	0.246618	0.246618	8.48507	8.48507
13367	Diaph1	4.54849	4.31375	4.78881	5.40757	4.65038	4.96646	7.29734	7.55478	7.84699	7.60899	6.17799	5.85836	0.279734	0.302059	0.276828	0.326426	0.267294	0.302772	0.940012	1.05741	1.30692	1.27044	1.35563	1.58951	7.23398	7.23399	7.23415	7.24442	7.59692	7.82238	7.93354	8.07365	8.53415	8.60599	9.11287	0.264215	0.264215	0.264215	0.264215	0.264215	0.264215	0.264215	0.272146	0.28046	0.287323	0.299529	11.3816	11.3816
13368	Dffb	2.71837	2.3093	2.7327	3.12976	2.58336	2.8037	3.13778	2.40066	2.80463	2.93392	3.02159	3.25975	0.322086	0.2108	0.246496	0.162648	0.31668	0.229357	0.810075	0.595189	0.700007	0.367447	1.03104	0.899462	2.92978	2.92978	2.92978	2.92978	2.92978	2.92978	2.92989	3.17842	4.09581	4.11805	4.57631	0.335645	0.335645	0.335645	0.335645	0.335645	0.335648	0.335697	0.397445	0.469644	0.472964	0.54335	5.16642	5.16642
13383	Dlg1	1.24478	2.08263	1.95783	2.09284	1.77633	1.75581	5.0879	5.3503	4.53407	5.38495	4.38805	6.86836	0.270713	0.261911	0.284392	0.327313	0.383826	0.405387	0.482037	0.573598	0.636466	0.775789	0.634476	0.697064	8.17997	8.17993	8.17782	8.14322	8.40996	9.00571	9.23455	10.9688	12.9863	14.0404	14.0527	0.296818	0.296818	0.296818	0.296916	0.373628	0.374808	0.374808	0.374808	0.389145	0.411821	0.411838	14.4657	14.4657
13385	Dlg4	1.09516	1.73558	1.50627	1.94027	1.4511	2.12888	1.51088	1.92185	1.55071	1.97926	2.04163	1.83295	0.710728	0.616314	0.683345	0.643906	0.862292	0.80734	1.01574	1.14949	0.94031	0.664689	1.10667	1.35817	3.44199	3.39232	3.33451	3.30592	3.2834	3.28025	3.27961	3.51569	3.90965	3.91135	3.91364	0.410567	0.457277	0.474103	0.483017	0.488707	0.489878	0.490856	0.571403	0.659708	0.72804	0.76643	10.6408	10.1971
13392	Dlx2	3.26853	4.13072	4.79322	6.37984	4.81434	5.77629	5.28126	5.601	6.57183	8.0369	9.3746	10.6561	1.33494	1.55105	1.7969	2.36592	3.55373	2.26007	1.51369	1.40729	1.63576	1.90446	2.23735	2.09803	0.720707	0.775398	0.870126	1.06155	1.68649	1.95871	2.04228	2.10745	2.06518	2.0543	2.05029	0.28364	0.265478	0.346161	0.449197	0.594901	0.621302	0.627469	0.557399	0.477015	0.474649	0.473798	2.32866	3.07326
13395	Dlx5	1.81243	1.28672	1.55465	1.4107	1.38208	1.74582	6.10975	4.08994	4.37039	4.73906	4.40079	3.7274	1.29494	0.755978	0.802692	0.780506	1.26742	0.906368	1.14417	0.896446	0.869742	0.657829	1.07851	0.787506	1.12085	1.12085	1.12085	1.12078	1.09859	0.997037	0.969314	0.965819	0.966519	1.01164	1.39512	0.197204	0.197204	0.197201	0.197156	0.187912	0.17122	0.170015	0.169928	0.170081	0.179238	0.249518	5.9328	5.93279
13424	Dync1h1	2.38318	1.87099	2.15795	1.88085	1.94825	2.00923	11.1303	9.25661	7.22932	9.40982	8.15356	7.30705	0.753391	0.647757	0.594729	0.464495	0.556215	0.625056	0.907703	1.11406	0.915984	0.627724	0.772887	1.02328	42.1344	42.0889	41.5297	40.9268	39.5349	37.5189	35.6504	32.9101	32.3849	32.388	32.3881	0.440466	0.422964	0.390072	0.389533	0.383101	0.3589	0.359683	0.359612	0.386334	0.388668	0.388668	38.6128	36.6546
13436	Dnmt3b	1.10425	0.844734	1.10388	0.963199	0.938893	1.16004	1.57202	1.35734	2.05509	2.3382	2.71125	2.80395	0.105198	0.0926191	0.105296	0.096782	0.227044	0.200853	0.16901	0.165934	0.221398	0.213372	0.476588	0.331829	1.06505	1.06735	1.08795	1.15361	1.56165	1.86596	2.00322	2.0081	1.72157	1.6738	1.66679	0.119577	0.122336	0.135394	0.161477	0.221453	0.232849	0.234321	0.220864	0.191625	0.187718	0.187096	2.11008	2.19826
13448	Dok1	4.67693	3.78857	3.25918	3.73705	3.61676	3.83381	6.3175	6.55839	6.8698	6.7742	3.61532	4.14847	2.45684	2.31384	2.09966	2.27753	1.55666	1.28138	2.77407	2.63662	3.36373	3.35072	2.09824	1.9189	19.0209	19.0209	19.0209	19.0209	18.961	17.5089	16.1936	14.261	13.529	9.22079	9.01749	2.13918	2.13918	2.13918	2.13918	2.00796	1.57397	1.56202	1.56181	1.40352	1.0136	1.01353	17.3055	17.3055
13481	Dpm2	2.24617	2.15034	2.17467	1.81458	2.17496	2.20281	5.76133	6.90704	7.58524	7.54665	7.46387	7.62038	0.979152	1.58347	1.75784	1.33916	1.61037	1.90223	1.53973	1.67644	1.76631	1.59083	2.03292	1.62368	16.5834	16.5837	16.5854	16.5911	16.6699	16.9357	17.4549	20.1604	21.6341	21.7649	21.7885	2.44924	2.44976	2.45189	2.45672	2.49912	2.5965	2.73212	3.09782	3.20486	3.21585	3.21833	20.1541	20.1654
13494	Drg1	3.27587	3.62007	3.79566	3.99103	3.93569	4.09076	16.0604	22.3605	17.9068	20.8854	18.1823	19.5129	1.03279	1.23678	1.01782	1.07635	1.29343	1.32759	2.68943	2.73014	3.12185	3.54528	3.60887	3.96704	29.9821	30.0813	30.311	30.5693	31.2673	31.7816	32.1544	33.0457	34.3522	35.4913	36.3867	0.794609	0.825557	0.84099	0.848593	0.858608	0.86382	0.868069	0.884518	0.918138	0.946937	0.969165	32.0513	33.4375
13495	Drg2	3.33734	3.09444	2.91012	3.09408	2.68213	2.71229	3.21999	5.43578	4.59391	3.97565	3.50114	4.29731	0.726631	1.19186	1.25196	1.18658	1.16973	1.19782	1.39743	2.24533	2.41959	2.63323	2.8905	2.66319	64.3895	64.2255	64.1229	64.0873	64.1336	64.2298	64.5147	69.5169	77.9805	79.2489	79.3298	1.37896	1.55138	1.67857	1.74597	1.79531	1.76909	1.79717	1.74786	1.77394	1.71113	1.68084	42.5531	42.5531
13496	Arid3a	3.67171	2.45462	3.14981	3.19552	3.29499	3.01829	3.66694	3.16678	3.00878	2.89046	3.33872	3.20618	0.445076	0.39881	0.416179	0.361691	0.327947	0.307549	0.44856	0.68557	0.706778	0.496126	0.756903	0.697877	1.68456	1.68456	1.6845	1.54808	1.51203	1.69227	1.70733	1.55935	1.53556	1.53606	1.53918	0.170226	0.170222	0.170197	0.170106	0.168342	0.161522	0.151796	0.14002	0.139316	0.139396	0.139719	3.34545	3.34532
13518	Dst	0.888656	1.1718	1.18	0.975839	1.00613	0.979291	0.898421	1.41756	1.68892	1.88172	0.880885	1.81311	0.497609	0.564169	0.568813	0.535391	0.528317	0.514569	0.956294	1.01746	1.02494	1.10676	0.920517	0.955526	16.6582	16.6582	16.6582	16.6582	16.558	15.5888	15.1334	14.8288	13.255	12.2985	12.2973	0.481	0.481	0.481	0.481	0.455038	0.427944	0.427927	0.427927	0.362858	0.355082	0.355081	29.9055	29.9055
13521	Slc26a2	2.45789	2.73247	2.78763	2.8378	2.56201	2.9334	8.38245	9.44351	10.3887	10.0914	10.4425	9.13713	0.154082	0.238879	0.252867	0.11432	0.273823	0.221398	0.186368	0.15392	0.311781	0.300563	0.280095	0.312516	1.96067	1.96189	2.02054	2.22177	2.73474	3.00816	3.23694	3.77431	3.82142	3.82163	3.82163	0.112844	0.114582	0.153385	0.184385	0.188473	0.191397	0.208346	0.219934	0.21995	0.21995	0.21995	2.64911	2.74015
13528	Dtnb	1.04138	1.59337	1.40583	1.86163	1.78816	1.91969	1.61444	1.84413	1.7734	3.09633	1.88126	2.78706	0.11517	0.139732	0.136328	0.149622	0.225397	0.281086	0.201592	0.318002	0.409662	0.32527	0.608611	0.635326	2.72408	2.72131	2.7237	2.76225	2.77838	2.80331	2.97002	3.25712	4.07435	4.44314	4.58686	0.113792	0.116957	0.125644	0.139042	0.171266	0.193477	0.211096	0.217364	0.218163	0.218244	0.218263	17.5899	17.5921
13537	Dusp2	1.35057	1.6496	2.14148	2.45784	1.679	2.65157	3.68947	4.26582	6.33763	5.85976	8.40394	9.18267	0.31996	2.13449	2.69217	2.51599	5.22036	4.15821	0.238498	1.12817	1.62771	1.82083	2.74365	2.54861	1.34947	1.6204	2.03576	2.74152	5.05079	5.54241	5.13857	5.27902	5.30077	5.30103	5.30105	0.377059	0.420446	0.638538	0.892794	1.10636	1.15985	1.22141	1.27872	1.28081	1.28086	1.28086	3.68566	4.81441
13544	Dvl3	0.850849	0.649625	0.656366	1.0243	0.791763	0.814578	2.77496	2.8131	2.45723	3.20111	3.13345	2.81659	0.701552	0.627065	0.597787	0.427783	0.583007	0.538744	1.95942	1.66419	1.68882	1.70981	1.34414	1.73327	1.77159	1.73446	1.69202	1.62873	1.36685	1.31453	1.30926	1.30842	1.30841	1.30841	1.30841	0.388254	0.370413	0.362177	0.339503	0.290973	0.287206	0.286833	0.286747	0.286746	0.286746	0.286746	11.7584	11.177
13559	E2f5	3.27122	2.80674	3.21357	2.92898	2.82758	2.74061	6.09139	8.25011	5.66541	7.88969	7.80738	7.92814	0.792362	0.992755	0.926903	0.97627	1.00986	1.1552	1.73727	1.98065	1.93071	2.11254	2.27808	2.73158	8.4706	8.4709	8.38083	8.43232	9.72786	10.4612	10.8578	12.0199	13.1912	13.3211	13.3456	0.72136	0.722368	0.799725	0.867803	0.902082	0.923561	0.940369	1.03672	1.04048	1.04637	1.04795	21.0791	21.1111
13591	Ebf1	1.77049	1.87208	1.61762	1.92011	1.67032	1.93458	2.24628	3.66193	3.20263	2.99011	3.18129	3.02681	0.13951	0.180897	0.158747	0.154678	0.12633	0.12077	0.0684998	0.130062	0.156769	0.275063	0.144726	0.289423	1.47392	1.47392	1.47392	1.47369	1.38818	1.35187	1.34773	1.3472	1.16151	0.911454	0.910725	0.14223	0.14223	0.142229	0.142083	0.13014	0.130003	0.130002	0.130001	0.10739	0.0879304	0.0878827	6.46019	6.46019
13593	Ebf3	2.81272	2.421	2.82062	3.26554	2.9151	3.22058	3.86614	3.56008	4.45636	4.92685	3.33011	4.30988	0.684778	0.714077	0.793362	0.875752	0.988604	0.970578	0.84114	0.81312	0.715876	0.966333	1.26268	1.06764	4.44488	4.4449	4.45273	4.61682	5.18195	5.41448	5.73645	5.92166	5.92282	5.92282	5.92282	0.477865	0.477899	0.488269	0.564082	0.581877	0.608245	0.635729	0.636758	0.636758	0.636758	0.636758	11.3755	11.3777
13601	Ecm1	0.436662	0.567962	0.551469	0.372865	0.434909	0.197782	7.28522	5.70568	5.48577	4.8236	4.4714	4.35559	0.943636	1.02436	0.853963	0.91577	0.719375	0.86706	0.812603	1.03338	0.897293	1.03566	0.754549	0.870687	15.4185	15.4185	15.4184	15.4176	15.2448	14.3393	13.6086	12.8144	11.8157	9.37994	9.13262	0.576451	0.57645	0.576419	0.576033	0.536353	0.481972	0.477151	0.476479	0.41892	0.345106	0.341139	19.7689	19.7688
13603	Opn3	1.58622	1.26173	1.63669	1.72452	1.4767	1.58462	3.74569	4.34509	4.94853	3.15583	3.24158	4.26389	0.151141	0.0967304	0.148023	0.147849	0.182308	0.188275	0.0391796	0.0391796	0.0391796	0.0391796	0.0391796	0.0391796	0.798184	0.798184	0.798184	0.798185	0.812434	0.882181	0.941723	1.26254	1.35585	1.35972	1.35988	0.0697017	0.0697017	0.0697017	0.0697044	0.0836848	0.0910791	0.0974887	0.118752	0.118753	0.118753	0.118753	0.635085	0.635085
13609	S1pr1	1.85194	2.0121	1.6092	2.16257	1.83234	1.77398	4.1086	3.59385	3.47182	3.35924	3.10009	3.13708	0.675874	0.35738	0.318329	0.155531	0.334089	0.282183	0.276895	0.139102	0.0949223	0.106563	0.147441	0.151568	6.44089	6.4407	6.41504	6.22953	5.61396	5.21505	4.95957	4.58108	4.50681	4.5299	5.35105	0.175328	0.175117	0.158005	0.126184	0.122621	0.122618	0.122618	0.122618	0.122627	0.124161	0.161176	5.74039	5.72609
13614	Edn1	2.63778	2.5531	2.63342	2.54608	2.22283	2.36244	8.83032	9.36397	10.0823	10.2497	6.56007	6.33655	2.41176	2.86986	2.84073	2.80832	1.77118	1.51	1.30648	1.53079	1.46252	1.51699	0.909524	0.863575	15.1577	15.1577	15.1575	15.1098	12.9066	11.8265	11.4245	10.8535	6.7683	6.76474	6.76474	1.68073	1.68073	1.68044	1.60073	1.24057	1.24038	1.24038	1.11651	0.750098	0.750098	0.750098	29.9737	29.9737
13619	Phc1	1.68003	1.38295	1.28443	0.937018	1.34584	1.0831	1.61699	1.83261	1.77639	1.41751	1.15455	0.911883	0.353645	0.360532	0.425503	0.400272	0.403844	0.40556	1.27527	1.61044	1.60507	1.82796	1.36929	1.16748	4.4876	4.4876	4.48758	4.48713	4.30241	3.93104	3.75389	3.61945	3.61424	3.61423	3.61423	0.148219	0.148219	0.148212	0.14803	0.124024	0.11945	0.119376	0.119373	0.119373	0.119373	0.119373	7.37102	7.37101
13626	Eed	3.9495	4.107	4.05874	3.78693	4.08407	4.04694	13.2986	13.9572	9.57863	11.9815	12.2222	11.9397	0.707461	0.869592	0.716693	0.797091	0.898261	0.924974	1.66166	1.81926	1.88787	1.94525	1.78827	2.26772	24.5974	24.5972	24.5397	24.2918	25.5664	27.0369	27.735	28.3914	33.1625	33.2038	33.5238	1.03993	1.0402	1.10178	1.15689	1.15839	1.15839	1.15839	1.16737	1.15241	1.15187	1.17073	42.2683	42.2683
13631	Eef2k	5.43952	6.77714	7.13717	7.93273	7.18581	8.0766	6.54605	9.59302	11.491	11.1937	10.9549	11.4827	0.304722	0.351721	0.504932	0.532202	0.611977	0.608523	0.436406	0.432467	0.508322	0.825616	1.03425	1.28688	7.54055	7.4353	7.42675	7.60438	9.00096	10.18	10.8763	14.5491	16.8486	16.8828	16.884	0.162677	0.153246	0.210806	0.281889	0.353294	0.369347	0.358465	0.309129	0.309446	0.309492	0.309504	10.8435	10.2908
13638	Efna3	1.10874	0.646558	0.720898	1.02178	0.867755	0.844855	0.767136	0.96721	1.07965	0.948545	1.26287	1.98115	0.225775	0.304914	0.379508	0.253386	0.533048	0.652521	0.379177	0.481329	0.677151	0.626646	0.668212	0.967984	0.869856	0.869997	0.871024	0.873947	0.903187	0.967898	1.06755	1.4008	1.72939	1.91578	2.10866	0.109356	0.1098	0.111314	0.114118	0.130543	0.158092	0.17896	0.275332	0.435377	0.47847	0.525567	0.652274	0.66053
13639	Efna4	1.54112	1.08175	1.10102	1.47894	1.17817	0.93845	7.13135	4.83204	3.78483	1.9974	3.241	3.15179	0.666034	0.454289	0.307143	0.312797	0.213641	0.288179	0.73511	0.396389	0.430254	0.203792	0.354923	0.451987	5.4063	5.36878	5.2185	4.98811	4.1892	3.52385	3.05295	2.3584	2.49903	2.83063	3.12263	0.543042	0.484102	0.407284	0.351662	0.271741	0.243289	0.231443	0.228093	0.258973	0.29213	0.320118	5.54393	4.44635
13640	Efna5	4.2767	3.52995	3.42953	4.10677	3.56785	3.45503	1.416	2.19194	2.19713	2.33418	2.5785	2.84358	0.224489	0.266184	0.249354	0.260978	0.302758	0.296779	0.327034	0.473978	0.472764	0.447798	0.651067	0.542292	1.39406	1.39393	1.36913	1.34125	1.37832	1.42305	1.63095	1.84346	1.84495	1.83329	1.71841	0.28263	0.28277	0.310808	0.360153	0.374272	0.395027	0.391503	0.370131	0.370111	0.367149	0.341318	4.0246	4.02461
13641	Efnb1	1.6427	1.65199	1.57093	1.40165	1.35703	1.33647	4.26334	4.85118	4.45358	5.32468	3.27867	2.50373	0.326879	0.357735	0.386123	0.485436	0.121119	0.0882944	0.234382	0.347929	0.441268	0.456392	0.141358	0.0982676	5.84371	5.85029	5.86328	5.86551	5.72349	5.3786	4.94646	3.56083	2.7526	2.6225	2.58752	0.0843371	0.0857781	0.0857059	0.0838322	0.0733839	0.0631685	0.0557499	0.0432468	0.0385524	0.0375916	0.0372523	4.7591	4.84601
13642	Efnb2	2.67026	2.64858	2.93034	3.41782	3.50643	3.44284	5.76237	5.59639	4.44615	4.64481	4.69481	6.71246	2.03221	2.24223	2.1659	2.07475	1.78468	1.86708	2.65782	2.94721	2.72846	2.55385	2.49859	2.33427	25.677	25.677	25.677	25.677	25.6769	24.9906	23.3343	22.1663	20.1288	14.2828	14.2739	2.3815	2.3815	2.3815	2.3815	2.38139	2.09215	2.0527	2.05267	1.62637	1.32388	1.32388	45.5365	45.5365
13649	Egfr	3.12619	2.57195	2.39144	2.90078	2.78378	2.59924	3.94456	4.66743	4.72874	5.59852	3.37893	3.61098	0.28999	0.293577	0.27739	0.242982	0.315892	0.266231	0.478658	0.326033	0.339958	0.339582	0.381804	0.266603	12.4131	12.4131	12.4131	12.413	12.236	11.8158	11.5689	11.278	10.0079	7.51373	7.45311	0.553897	0.553897	0.553896	0.553814	0.507831	0.501761	0.501738	0.501731	0.39227	0.332692	0.332537	14.0407	14.0407
13650	Rhbdf1	1.84775	1.28325	1.57397	1.77388	1.5938	1.81138	5.16407	5.2719	5.1488	6.04289	3.8414	4.5542	1.30104	1.57672	1.54344	1.43165	1.3894	1.19038	1.72579	2.03748	1.902	1.65655	1.89434	1.73749	11.8394	11.8394	11.8394	11.8394	11.8394	11.745	11.3019	10.8564	9.91887	7.87396	7.86409	1.19619	1.19619	1.19619	1.19619	1.19616	1.13104	1.09445	1.0943	0.894426	0.794547	0.794541	17.2829	17.2829
13653	Egr1	1.77903	1.57219	2.09615	1.38939	2.19114	1.78926	16.7405	20.9947	31.9937	37.3415	14.4497	11.3327	5.63623	8.27351	17.8882	20.0042	4.96906	2.52322	3.51534	5.63913	11.6215	13.448	4.17924	2.28944	3.37729	3.37729	3.37729	3.37729	3.37729	3.3773	3.37767	4.59307	3.78223	1.61639	1.59466	1.06031	1.06031	1.06031	1.06031	1.06031	1.06032	1.06053	1.52513	1.11456	0.506479	0.500632	25.7133	25.7133
13655	Egr3	1.98227	2.08359	2.40773	1.92065	2.38174	1.982	1.38418	1.18989	4.07131	4.84209	1.36345	0.482491	0.654081	1.04398	2.92572	3.33023	0.805414	0.404166	1.13053	1.99562	4.34855	6.39886	0.892696	0.621019	0.835493	0.835493	0.835493	0.835493	0.835393	0.753293	0.510923	0.473369	0.330307	0.189513	0.189428	0.196034	0.196034	0.196034	0.196034	0.195932	0.148315	0.111456	0.111067	0.0696442	0.0444586	0.0444459	4.23206	4.23206
13660	Ehd1	7.17903	5.60402	5.71297	6.28543	6.11723	6.14604	5.55881	6.26696	5.08492	5.73821	4.40844	4.45202	1.19004	1.46997	1.37968	1.34905	0.949793	0.971227	1.78809	2.12984	1.88858	1.56821	1.5633	1.37312	32.8296	32.8296	32.8296	32.8296	32.8278	32.4313	31.1111	27.9089	25.2992	25.1644	25.1577	1.00958	1.00958	1.00958	1.00958	1.00848	0.902081	0.858414	0.786353	0.773646	0.773646	0.773646	24.6799	24.6799
13663	Ei24	0.410153	0.832263	0.755386	0.462896	0.536673	0.645627	5.40672	5.63623	3.99875	4.88217	4.62737	5.81386	0.304278	0.256234	0.222256	0.253089	0.378745	0.354942	0.479101	0.359503	0.292596	0.510255	0.682365	0.648495	22.3045	22.3045	22.3045	22.3045	22.3045	22.3045	22.3046	22.9053	27.8485	28.1496	29.2859	0.219543	0.219543	0.219543	0.219543	0.219543	0.219543	0.219543	0.251491	0.27719	0.277337	0.30338	16.4646	16.4646
13665	Eif2s1	6.82523	7.72601	7.77024	7.82535	7.76785	6.50747	6.42168	9.98737	10.1101	10.1574	9.87078	9.10777	0.90193	1.27	1.36454	1.59865	1.61973	1.44995	2.07959	2.31144	2.63593	2.82867	3.02035	3.16062	67.0958	67.0525	66.9384	67.0672	68.1289	68.8338	69.2756	70.3819	84.0538	84.5154	84.5263	1.25474	1.29844	1.43886	1.47717	1.50018	1.50019	1.50019	1.55126	1.52799	1.5238	1.5238	62.7069	62.7072
13666	Eif2ak3	1.85903	1.6231	1.78634	1.76124	1.49524	1.27507	5.85807	4.53228	2.79861	2.8351	4.41574	3.38855	0.406181	0.291147	0.325851	0.284888	0.287663	0.253619	0.58034	0.558283	0.670388	0.572242	0.431278	0.447108	4.58063	4.57947	4.56974	4.53723	4.2748	4.0047	3.8401	3.64896	3.48689	3.43107	3.42108	0.198486	0.19779	0.194643	0.187729	0.166221	0.16041	0.159063	0.156876	0.15022	0.148518	0.148208	6.52212	6.48977
13682	Eif4a2	7.83857	5.39244	5.09028	5.66875	4.88169	5.02279	32.9673	31.0078	23.5171	28.9684	31.897	32.2724	11.9768	11.6229	9.14018	9.41245	10.6098	11.827	8.4163	7.98156	6.52309	7.01623	7.6556	8.39274	72.4611	72.4088	71.6442	69.0153	59.5589	56.552	56.0223	59.4639	65.0415	65.2052	65.2164	35.9304	35.7413	34.204	31.3638	27.9471	27.7116	27.7505	29.9592	32.2706	32.3335	32.3382	262.025	257.124
13684	Eif4e	4.42407	5.49615	5.633	5.84858	5.49849	5.82884	8.54082	7.9545	8.36256	7.15034	6.2809	5.54589	1.46803	2.00106	2.26552	2.57314	2.26692	2.49992	1.75664	2.58858	3.37695	3.80219	3.34082	3.18646	84.2337	84.3925	85.7842	88.6512	97.2736	103.112	107.043	118.869	127.039	127.464	127.485	1.82195	1.9018	2.19033	2.3755	2.4491	2.4568	2.47583	2.69803	2.75618	2.7574	2.7575	75.6401	80.1437
13685	Eif4ebp1	10.2366	9.64716	10.2443	10.1575	9.45524	9.61991	12.484	15.4951	17.0382	14.5969	14.2217	11.9661	2.61255	4.13903	4.29093	4.35525	3.77381	3.55075	3.97776	4.49699	5.53606	5.65159	4.95473	5.02056	100.236	99.8646	99.7183	103.64	110.26	110.283	110.714	121.552	125.112	117.824	116.914	0.852266	1.2466	1.45319	1.52163	1.52308	1.43429	1.40172	1.17627	1.08469	1.0067	1.00488	73.1315	73.1315
13688	Eif4ebp2	2.71462	3.06908	3.12521	3.25953	3.19955	3.18423	2.50767	3.5731	4.59056	4.40381	2.78157	4.06698	0.721464	1.24825	1.4624	1.49304	1.28319	1.16411	0.832338	1.06647	1.88754	1.84444	1.70674	1.7987	5.37006	5.28509	5.53297	5.87641	6.16839	6.20025	6.20385	7.04369	8.61457	8.61513	8.61513	0.597696	0.738434	1.01858	1.02899	1.02924	1.02924	1.0293	0.990542	0.98048	0.980518	0.980518	23.807	25.2318
13709	Elf1	2.45573	1.85026	1.93996	2.40052	1.97498	2.17574	14.2642	11.8606	11.5696	10.8117	11.3016	12.1418	0.349802	0.343761	0.312061	0.282817	0.245593	0.282298	0.745888	0.470614	0.512555	0.742602	0.791966	0.468671	7.18747	7.17935	7.13397	7.02917	6.50346	6.06387	5.80839	5.55215	5.53967	5.5619	5.60131	0.183858	0.181476	0.175115	0.166236	0.148474	0.143741	0.142416	0.141618	0.141758	0.14241	0.143469	10.9723	10.8042
13713	Elk3	1.74241	1.51252	1.96554	2.07291	1.93114	2.23724	6.32146	5.40431	6.97492	7.7214	4.27798	4.01926	1.71483	1.85761	2.09587	2.05009	1.28693	1.22365	2.38486	2.60177	2.65227	2.35655	1.58024	1.79301	15.9327	15.9316	15.9241	15.9001	15.6015	14.9512	14.2893	13.0803	11.1011	9.52029	8.99235	0.547962	0.547522	0.545861	0.541998	0.513982	0.48274	0.465876	0.442109	0.369396	0.322434	0.307744	24.8678	24.8424
13723	Emb	0.883072	1.33332	1.38768	1.39467	1.54005	1.35948	2.18522	3.09785	4.86856	4.69853	3.49482	4.65379	0.128254	0.110835	0.157354	0.169238	0.174176	0.215992	0.130165	0.196205	0.203643	0.249286	0.204802	0.277948	19.19	19.2003	19.2317	19.2477	19.4989	19.8667	20.3124	22.4963	26.9115	30.6527	33.7336	0.0896609	0.0907181	0.0918228	0.128288	0.139123	0.143732	0.148228	0.140592	0.138689	0.155317	0.169024	11.3203	11.4604
13726	Emd	1.83585	1.34088	1.33769	1.49846	1.3521	1.57661	5.77579	5.88989	4.78305	4.71256	4.58447	4.76114	1.12054	1.24612	0.971053	1.061	0.848221	1.03631	1.30917	0.93547	0.994396	0.736583	0.949416	1.11934	26.4883	26.4883	26.4883	26.4883	26.4671	25.1047	24.0675	22.5652	20.5587	20.502	20.5007	1.23236	1.23236	1.23236	1.23236	1.19971	1.03884	1.03882	1.02364	0.953786	0.953786	0.953786	24.7778	24.7778
13730	Emp1	2.34833	2.11577	2.07493	1.75544	2.16733	2.21959	12.0726	10.5131	9.64253	10.9705	6.86797	6.88225	1.87876	1.95182	2.15249	2.19383	0.940394	0.797262	2.74787	3.27725	2.90863	3.46492	1.20538	1.13398	118.843	118.457	117.515	116.358	112.742	108.552	104.161	85.1892	56.5429	42.6774	36.1261	1.97782	1.88181	1.82629	1.79099	1.41391	1.34978	1.28257	1.29065	1.02978	0.813661	0.708084	99.194	93.9262
13732	Emp3	1.86775	1.07902	1.23414	1.57579	1.18054	1.32747	3.99788	4.82671	4.24877	3.92039	3.03304	3.50948	1.68439	1.76644	1.68465	1.70696	1.71654	1.83707	0.962656	0.684267	0.548011	0.625906	0.52697	0.596447	29.1486	29.1486	29.1486	29.1486	29.1485	28.4177	26.6963	23.9293	18.8964	16.7385	16.6473	0.606189	0.606189	0.606189	0.606189	0.606236	0.495242	0.525281	0.529811	0.549919	0.552112	0.552118	23.0486	23.0486
13803	Enc1	4.43144	4.08768	3.89361	4.54254	4.5783	3.91414	9.74453	6.32434	8.84176	9.55676	6.26164	6.61179	2.48381	2.22717	2.73992	2.87162	2.19233	1.79225	2.81121	2.69692	2.87101	3.00999	2.72177	2.48801	18.4405	18.4405	18.4405	18.4404	18.3476	17.4368	16.8187	16.4714	14.4032	11.5031	11.4396	1.54843	1.54843	1.54843	1.54834	1.50702	1.39054	1.38311	1.38254	1.14168	0.963266	0.960518	38.9177	38.9177
13807	Eno2	0.533535	0.421011	0.532625	0.357815	0.446247	0.485648	0.84592	0.788155	0.594085	0.687724	1.25898	0.384877	0.384797	0.270317	0.219751	0.217742	0.344648	0.384239	4.52691	3.63001	3.62305	3.47422	4.21881	4.11855	0.888672	0.888672	0.888671	0.888672	0.888627	0.885068	0.833221	0.672804	0.671644	0.671644	0.671644	0.126143	0.126143	0.126143	0.126143	0.126114	0.124399	0.108905	0.0953472	0.0953366	0.0953365	0.0953366	2.64761	2.64761
13808	Eno3	11.7151	10.3765	10.9933	11.2652	10.4322	11.0888	1.7932	1.47743	1.68261	2.74179	3.4444	2.55726	1.44839	1.44764	1.56751	1.36319	1.58698	1.43554	1.24949	0.9479	1.36581	1.25514	1.1622	1.04155	20.2039	20.2039	20.2039	20.2039	20.2039	20.0517	19.3745	18.1437	17.6461	13.4171	13.0634	0.420396	0.420396	0.420396	0.420396	0.420394	0.377219	0.369401	0.3694	0.351625	0.271365	0.271364	14.3779	14.3779
13821	Epb41l1	1.18925	0.890298	0.808048	0.878179	0.828525	0.828306	0.439681	0.844573	0.890416	0.815453	0.107033	0.356715	0.487029	0.492991	0.521137	0.51283	0.518809	0.58015	1.3699	1.71458	1.57299	1.42726	2.2586	2.12135	11.8839	11.8839	11.884	11.9331	12.8686	13.4521	13.7934	14.2178	14.2732	13.5937	12.9132	0.218306	0.218306	0.218382	0.239967	0.262213	0.262214	0.262214	0.262214	0.262204	0.241214	0.236954	12.7495	12.7495
13822	Epb41l2	3.10373	1.67926	1.8314	2.08864	1.83738	2.03765	7.40603	5.97199	4.74669	6.71474	5.70272	7.25808	0.821035	0.846191	0.833449	0.844727	0.789599	0.819098	1.01794	1.28532	1.1328	1.096	1.02462	1.25536	43.0409	43.0409	43.0409	43.0409	43.0126	41.478	40.5289	39.477	37.8589	30.904	30.8381	0.782195	0.782195	0.782195	0.782195	0.767068	0.715512	0.715512	0.715512	0.61214	0.560419	0.560419	51.5604	51.5604
13823	Epb41l3	2.39829	2.27693	2.3415	2.84249	2.32243	2.9057	5.54005	5.2498	3.89924	3.50306	4.07939	5.20028	0.450016	0.438953	0.389342	0.35593	0.442018	0.481347	0.715187	0.749437	0.718438	0.662218	0.927048	0.829251	21.7689	21.7519	21.6011	21.4634	21.1857	21.036	20.9553	20.8689	20.0884	17.0388	16.9695	0.405119	0.396265	0.388249	0.388221	0.38822	0.388221	0.388221	0.38822	0.355736	0.315876	0.315791	26.9044	26.135
13824	Epb41l4a	1.08095	1.23214	1.36366	1.36433	1.47348	1.39527	2.45381	2.82069	2.41636	1.90443	2.05058	1.76033	0.401451	0.368886	0.386047	0.384096	0.343946	0.320493	7.21332	7.61937	7.02348	7.50739	9.00048	8.65809	9.87468	9.87469	9.8747	9.87519	9.85679	9.27443	9.19822	8.50086	7.10751	7.10629	7.10629	0.222547	0.222547	0.222547	0.22254	0.181674	0.16865	0.179389	0.178313	0.151164	0.151164	0.151164	18.5365	18.5365
13836	Epha2	2.51054	1.722	2.35825	2.3025	2.14392	2.39583	13.6605	15.0542	14.6377	18.5602	12.8912	10.8352	2.34517	2.77065	3.55774	3.64439	1.76069	1.26112	2.77464	3.42763	3.44681	4.50397	1.88822	1.74587	46.3135	46.3135	46.3134	46.3122	46.0532	43.368	39.926	35.596	30.3455	18.3282	16.9763	1.78852	1.78852	1.78847	1.78788	1.71744	1.43642	1.36835	1.35818	1.05153	0.676514	0.65366	57.5097	57.5096
13838	Epha4	1.19781	0.715686	0.819584	1.13165	0.97967	0.927636	1.09003	1.28012	1.54321	1.38208	1.52828	1.4637	0.207872	0.161347	0.160115	0.156312	0.203124	0.178391	0.286088	0.284608	0.281088	0.249451	0.216905	0.181277	3.37856	3.37855	3.37818	3.3727	3.06874	2.717	2.56322	2.45941	1.95438	1.51891	1.50021	0.125876	0.125871	0.125716	0.123965	0.0950975	0.0917427	0.0916053	0.0914454	0.0673868	0.056266	0.055879	6.14807	6.1477
13841	Epha7	3.05274	2.10309	2.54267	1.99942	1.82227	2.53202	5.58912	5.09868	4.69155	6.26657	5.29993	5.44503	0.0682055	0.0437624	0.0373426	0.0577246	0.0454457	0.0759434	0.214436	0.188004	0.106021	0.12237	0.0391796	0.141481	1.02244	1.02162	1.01455	0.991443	0.830964	0.736657	0.768746	1.02838	1.07483	1.07644	1.07666	0.11216	0.111347	0.107522	0.0991825	0.0760023	0.0786399	0.0912399	0.115208	0.117959	0.118089	0.118108	2.3854	2.35666
13845	Ephb3	1.50363	1.14045	0.970582	1.43257	1.0202	0.857985	6.85054	5.91361	5.52821	5.56698	5.03522	5.4591	0.993129	0.647104	0.68618	0.647444	0.871901	0.700294	1.20542	0.679702	0.732625	0.626424	1.02789	0.747574	1.37498	1.3749	1.36999	1.32937	1.18565	1.14685	1.13802	1.13538	1.0989	1.05922	1.05811	0.274096	0.273928	0.266615	0.240271	0.22641	0.226344	0.226342	0.226325	0.217388	0.211081	0.210928	4.07879	4.07142
13849	Ephx1	1.26924	0.849202	0.927567	1.06181	0.957141	0.918766	1.14358	1.40667	1.40583	0.965742	0.964057	0.730898	0.205001	0.157921	0.135248	0.107394	0.201546	0.140553	0.0841506	0.136051	0.232017	0.0988596	0.220423	0.16859	7.06359	7.06305	7.03885	6.97936	6.82	6.70219	6.61517	6.17922	4.97796	4.85476	4.84394	0.0875245	0.0871524	0.0809444	0.0790475	0.0789432	0.0789422	0.0789247	0.0662533	0.0600115	0.0600081	0.0600081	4.29907	4.26946
13852	Stx2	1.28481	1.06118	1.25425	1.10297	0.811274	1.33399	4.22152	4.26847	3.13841	2.93231	3.80356	3.55913	0.492594	0.370163	0.320401	0.259931	0.384796	0.425236	0.427682	0.462462	0.416364	0.262973	0.35731	0.320396	6.1499	6.11751	6.01969	5.89129	5.47753	5.10995	4.85568	4.36849	4.20972	4.22042	4.25245	0.238726	0.218465	0.202228	0.19247	0.182947	0.206857	0.203741	0.198053	0.200495	0.206463	0.208174	5.36765	4.78618
13854	Epn1	1.35191	0.977557	1.40569	0.856135	1.29122	1.06266	10.7203	8.93694	9.23652	8.77794	9.1583	8.52263	0.761193	0.704258	0.859143	0.81736	0.904363	0.703537	1.09119	0.893063	1.08196	0.921199	1.05015	0.974667	13.9125	13.9125	13.9125	13.9125	13.8536	12.7676	12.5339	12.7146	12.7316	12.7317	12.7317	0.437224	0.437224	0.437224	0.437224	0.409092	0.356684	0.399277	0.400118	0.400118	0.400118	0.400118	17.1403	17.1403
13859	Eps15l1	4.15655	3.51578	3.02374	3.87128	3.58675	3.1083	3.67456	4.10163	4.39254	3.57892	2.82112	3.6471	0.838523	0.825198	0.859729	0.715363	0.760155	0.807596	0.769717	0.895958	0.871845	0.576488	0.726063	0.805215	8.1524	8.15262	8.16394	8.21305	8.30563	8.2053	8.08098	7.33371	6.98383	6.97522	6.97931	0.67336	0.668843	0.653406	0.628028	0.571167	0.556787	0.553169	0.5512	0.551084	0.551246	0.551686	19.601	19.4137
13860	Eps8	1.38694	1.296	1.11283	0.935265	1.16791	1.14341	1.07293	0.945727	1.4703	1.74114	1.24524	1.49756	0.402563	0.618741	0.593042	0.613081	0.371721	0.4204	0.549743	1.0722	0.835071	0.821361	0.616781	0.798747	25.3688	25.3688	25.328	25.3343	25.3481	25.3563	25.3612	25.4036	23.9903	19.1017	19.6377	0.309203	0.309206	0.354428	0.354442	0.354442	0.354442	0.354442	0.307974	0.264936	0.229633	0.246001	25.6909	25.6909
13864	Nr2f6	3.4561	2.74918	2.9918	3.24554	2.81972	2.76149	4.97492	3.46103	4.83375	3.94144	3.82662	4.30448	1.46312	1.60434	1.38359	1.46789	1.77047	1.58111	3.16407	3.36831	3.28759	2.7556	3.1204	3.31272	14.5337	14.5332	14.5205	14.4029	13.0163	12.4583	12.3442	13.1886	13.5251	13.5414	13.5421	3.94648	3.94702	3.96022	3.90735	4.28332	4.23767	4.28618	4.58227	4.58473	4.58472	4.58473	11.0517	11.0517
13865	Nr2f1	1.42685	1.29862	1.40635	1.74463	1.37138	1.51952	0.335803	0.183783	0.201906	0.309173	0.289294	0.224549	0.787514	0.663868	0.705439	0.599149	0.817555	0.789327	1.0053	0.603143	0.791353	0.447627	0.73148	0.664733	4.76935	4.76934	4.76927	4.76908	4.76674	4.7594	4.74521	4.6737	4.85777	5.50199	6.43593	0.735719	0.735706	0.735659	0.735558	0.734701	0.732673	0.729518	0.7198	0.756843	0.86358	1.00997	10.3927	10.3924
13866	Erbb2	2.20977	2.20104	2.08422	2.10499	1.96058	1.66943	7.05126	6.3544	6.79912	5.89053	6.63974	6.13978	0.435263	0.537569	0.435814	0.325117	0.515894	0.406411	2.15517	2.02019	2.14648	1.45171	2.31421	2.07404	7.70368	7.70368	7.70368	7.70368	7.70359	7.52544	7.2247	6.85998	6.07735	5.55354	5.54698	0.156252	0.156252	0.156252	0.156252	0.156217	0.13864	0.138228	0.138228	0.113369	0.112506	0.112506	8.51394	8.51394
13870	Ercc1	2.52519	2.54435	2.54035	2.25842	2.40251	2.38036	5.83671	5.53858	6.07985	6.07724	3.99909	4.71398	1.0732	1.58831	1.88282	1.93618	1.96111	1.75199	3.27133	3.9107	4.13768	4.09886	3.71382	3.75746	8.31343	8.31434	8.34949	8.45455	8.36424	8.02522	7.85111	6.9107	6.39801	6.42824	6.42859	0.612245	0.613698	0.638999	0.654365	0.575197	0.566916	0.566709	0.566695	0.566695	0.566695	0.566695	12.3789	12.4484
13874	Ereg	3.96257	3.50052	3.48506	3.08723	3.57856	3.63708	8.8886	12.4894	12.0133	12.5776	7.10055	7.62211	0.793764	1.65299	1.60399	1.69169	0.643721	0.568996	0.724027	2.04178	1.60735	1.55312	0.580247	0.712431	19.2384	19.2384	19.2384	19.2384	19.2373	18.7998	16.7053	15.1564	15.1256	12.5673	11.2053	1.06244	1.06244	1.06244	1.06244	1.06194	0.951189	0.838311	0.835714	0.834898	0.662628	0.618353	40.5367	40.5367
13875	Erf	2.76871	3.0457	3.2303	3.18582	2.81364	3.08906	9.60579	9.50463	9.51619	11.3132	9.94167	10.2163	3.24043	3.92483	4.21649	4.01481	4.42346	4.54592	4.27338	4.38667	4.3094	4.49454	4.88979	5.25209	9.6348	9.63548	9.77167	10.2993	11.8733	12.7918	13.3009	13.8727	13.9314	13.927	13.4954	1.30877	1.31247	1.58395	1.81617	1.8915	1.89247	1.89248	1.89248	1.89248	1.89104	1.79421	11.397	11.5911
13972	Gnb1l	3.73382	3.68403	4.11789	4.25178	4.33019	4.08927	7.50342	8.58263	8.2688	8.63602	7.00842	8.86068	0.177629	0.2189	0.226729	0.268513	0.317241	0.300659	0.15291	0.0391796	0.158713	0.137405	0.335751	0.171756	1.66505	1.66511	1.6837	1.8233	2.21292	2.38264	2.45446	2.60813	3.11794	3.11917	3.11917	0.193534	0.193703	0.224647	0.281793	0.291404	0.291412	0.291414	0.322861	0.362549	0.362551	0.362551	2.86439	2.87403
14042	Ext1	3.47258	3.48524	3.66192	4.4158	3.97806	4.53269	6.21759	5.23645	5.38055	5.08167	4.54294	4.89454	1.59955	2.04044	1.86502	1.7836	1.6706	1.79072	2.33812	3.39541	2.99611	2.81324	2.66946	3.17388	69.6642	69.8587	71.0384	72.2311	73.9601	73.7	73.5181	73.3201	70.2486	59.614	55.68	2.2187	2.2187	2.21869	2.21825	2.11274	2.09683	2.09669	2.09666	1.92058	1.70172	1.69986	94.9258	94.9258
14048	Eya1	1.25193	0.960149	0.805465	0.948982	1.11107	0.986311	5.29465	2.99335	4.23842	3.64619	4.14758	4.19137	0.607069	0.447403	0.497515	0.562678	0.5577	0.443072	0.687726	0.411826	0.563112	0.627186	0.679384	0.421815	6.49259	6.46639	6.38225	6.26034	5.82512	5.44154	5.15806	4.65874	4.554	4.67971	4.8576	0.478691	0.466829	0.452313	0.438563	0.405028	0.38217	0.366765	0.340323	0.33625	0.346189	0.359485	16.7679	16.265
140481	Man2a2	0.913402	0.977071	0.846774	1.09658	1.00531	0.980464	1.06112	1.54802	0.959673	1.23286	1.18268	1.5869	0.178211	0.166789	0.136199	0.145301	0.2391	0.278226	0.482622	0.274497	0.247269	0.24136	0.50914	0.57478	1.99603	1.97416	1.95161	1.93516	1.90807	1.8976	1.89356	1.89102	1.77524	1.564	1.55952	0.0841536	0.0797461	0.0797254	0.0797253	0.0797253	0.0797253	0.0797253	0.079722	0.072376	0.0658294	0.0657482	3.79299	3.59358
140482	Zfp358	0.389715	0.894027	0.329893	0.687439	0.63661	0.709931	6.01971	4.21705	4.85384	4.24456	4.11893	4.41891	0.929033	0.768839	1.02612	0.856104	0.908161	1.00052	3.8141	3.27946	2.2515	3.08645	3.31376	3.48548	7.17744	7.0898	6.51513	5.86383	5.50291	5.51358	5.39941	4.94104	4.79987	4.79435	4.79411	0.883726	0.752883	0.663466	0.6333	0.61052	0.57531	0.540732	0.514668	0.513625	0.513598	0.513595	7.00758	5.14636
140486	Igf2bp1	5.29033	4.8568	5.59955	5.5902	5.48466	5.46053	8.23952	8.56427	9.02345	8.28567	7.79516	7.61814	1.30079	1.42318	1.49699	1.47771	1.28881	1.4811	2.09239	2.12494	2.37663	1.90399	2.44997	2.29143	11.5212	11.5212	11.5212	11.5212	11.8278	12.1588	12.1172	12.09	12.0892	11.6066	10.6585	0.76788	0.76788	0.76788	0.76788	0.766759	0.694221	0.694181	0.694181	0.694181	0.642061	0.611935	24.3914	24.3914
140500	Acap3	8.64769	8.18989	8.03703	9.12361	8.37117	8.08002	4.29532	5.37193	5.47602	6.5118	2.81171	3.93232	0.68683	0.911486	0.904054	0.954781	0.708302	0.712254	1.60008	1.70981	2.19927	1.98541	1.75628	1.78459	9.14467	9.13903	9.08341	9.32201	10.1978	10.6679	10.9896	11.102	11.1006	10.5086	9.57324	0.811095	0.817253	0.981287	1.15882	1.19215	1.17356	1.03512	0.956097	0.955838	0.875768	0.822544	12.7773	12.7907
14051	Eya4	2.03436	1.95909	2.02147	2.21659	2.30288	2.43385	6.95997	4.48133	4.69008	3.74131	5.34373	4.38707	2.3606	1.61563	1.93023	2.16175	2.52839	1.851	2.50925	1.751	2.19326	2.8197	2.33465	1.73503	26.9832	26.9832	26.9832	26.9832	26.983	26.3214	25.0292	23.5959	20.5512	20.5494	20.5494	2.10523	2.10523	2.10523	2.10523	2.10495	1.91046	1.88915	1.7331	1.60326	1.60326	1.60326	52.3693	52.3693
14055	Ezh1	1.75653	2.72687	2.93839	2.95533	2.60776	2.92611	3.51902	3.78071	5.0775	4.05145	4.58475	4.4134	0.208069	0.277925	0.397788	0.454593	0.530104	0.531769	0.477974	0.299632	0.530021	0.760875	0.810742	0.668705	1.97728	1.98041	2.00838	2.08231	2.90257	3.89958	4.64151	5.18556	5.20724	5.26376	5.59065	0.156194	0.159651	0.194865	0.283598	0.380691	0.384749	0.385091	0.385166	0.385582	0.391075	0.420078	3.63841	3.78499
14056	Ezh2	3.84212	3.70096	3.96429	3.99509	3.77407	3.60331	11.8678	9.22766	9.54679	10.6752	9.61281	11.7937	0.753692	0.636603	0.50971	0.532384	0.549949	0.683972	3.34022	3.446	3.29599	3.0519	2.94685	3.62269	21.9277	21.7144	21.1066	20.3229	18.1207	16.7716	16.1316	16.3799	18.8402	20.6447	21.7565	0.83468	0.771684	0.714097	0.673865	0.616321	0.599864	0.598322	0.634723	0.72856	0.793036	0.832579	40.8443	37.3618
14057	Sfxn1	3.80949	5.79575	5.53741	6.71335	5.7685	5.5696	3.85231	5.64482	7.53349	6.06506	5.92207	6.34318	0.668551	0.957579	1.09673	1.24667	1.25911	1.38126	1.32171	1.13038	1.41698	1.81965	2.21514	2.01059	37.2828	37.2407	37.0648	37.2154	39.6475	41.679	43.0705	46.5617	59.5943	60.6941	60.7478	0.995342	1.03888	1.25043	1.39943	1.59424	1.59564	1.59561	1.61521	1.6054	1.60482	1.60481	28.3848	28.3923
140570	Plxnb2	7.30252	6.37538	6.37373	6.01258	6.58375	5.85975	7.19843	7.01985	6.32471	5.36101	4.81863	4.35174	1.37298	1.12999	1.00626	0.828299	0.845797	0.972421	1.30665	1.19288	1.01652	0.842592	0.941867	0.838605	43.0888	43.0888	43.0967	43.1351	42.7992	40.2683	38.3013	35.0719	33.5637	28.5845	28.1402	0.527033	0.527021	0.518951	0.476331	0.424005	0.376921	0.376642	0.376637	0.381364	0.411759	0.41177	34.025	34.025
140579	Elmo2	1.79401	1.47768	1.4121	1.56199	1.45815	1.45242	5.44135	5.3064	5.1539	4.87779	3.94145	4.48159	0.694362	0.551589	0.512684	0.439962	0.606124	0.642828	2.45068	3.87326	4.04231	4.24864	3.92872	3.90607	8.4882	8.48251	8.43147	8.293	7.70825	7.28224	7.0396	6.80933	6.64629	6.58809	6.57648	0.49978	0.494072	0.469342	0.436589	0.40379	0.426441	0.466272	0.464697	0.471262	0.47485	0.474307	10.29	10.0899
14062	F2r	2.39127	2.14704	2.00114	2.14746	2.32595	2.24789	8.8144	9.40473	9.76227	10.2598	6.85705	8.32285	0.79553	0.90294	0.899584	1.0386	0.68014	0.632368	1.07861	1.30883	1.38116	1.42104	0.94212	0.847473	54.2123	54.2123	54.2123	54.2123	54.2032	53.6097	51.9414	48.2645	45.2391	36.2709	34.8596	0.46305	0.463051	0.46305	0.463049	0.461573	0.419149	0.400945	0.400018	0.356742	0.297409	0.29666	34.5685	34.5685
140629	Ubox5	3.18022	3.21563	3.31566	3.58725	3.42998	2.82318	6.06732	7.4621	8.46435	7.91603	6.27086	8.0928	0.62823	0.737639	0.78094	0.88886	0.932247	0.944804	1.24096	1.29587	1.32219	1.21308	2.04356	1.65407	1.16188	1.16189	1.16195	1.16217	1.16572	1.18065	1.21588	1.42685	1.49387	1.47521	1.4651	0.0422987	0.0423016	0.0423133	0.042344	0.0427005	0.0438208	0.0458789	0.0531397	0.054326	0.0536375	0.0533119	2.42711	2.42732
14066	F3	5.41123	5.50485	5.30644	6.60415	5.62652	5.88481	7.69336	7.06482	7.73528	6.34883	6.86898	6.54707	1.47814	1.52348	1.68182	1.52399	1.66665	1.34247	2.06744	1.94644	2.14138	2.07884	2.08024	1.6798	25.98	26.0856	26.5309	27.2346	29.1985	29.7208	28.8225	20.0637	13.3094	12.4289	12.2307	1.2732	1.32563	1.40849	1.47088	1.5093	1.44194	1.3247	0.867054	0.637995	0.606484	0.598612	42.834	45.0745
140721	Caskin2	3.70371	3.41145	3.26858	3.60951	3.48667	3.62104	5.33819	2.78863	2.81155	1.95984	3.04846	3.3402	0.727813	0.415274	0.423267	0.373016	0.46595	0.43126	1.69167	1.31018	1.18288	0.879091	1.29009	1.62985	3.50099	3.50087	3.52989	3.52635	3.36204	3.09891	2.95769	3.23859	3.38484	3.38898	3.38933	0.221322	0.221188	0.188005	0.174268	0.178836	0.188938	0.194242	0.224945	0.228726	0.228857	0.228873	5.04794	5.04335
140742	Sesn1	7.00394	5.68679	5.45774	5.63841	5.56898	4.97917	2.61107	3.09332	2.62122	3.68927	2.26614	1.89212	0.286704	0.240782	0.226656	0.230502	0.260917	0.290125	0.837842	0.433339	0.56831	0.490895	0.879693	0.611223	13.4332	13.4332	13.4329	13.4324	13.4278	13.4176	13.4029	13.4453	15.3544	18.2786	20.3341	0.307996	0.307978	0.307939	0.307877	0.30755	0.307062	0.306601	0.311183	0.368369	0.433421	0.474882	13.8829	13.8819
14081	Acsl1	2.90457	2.35406	2.5018	2.46958	2.5627	1.94797	4.48807	6.46332	7.51676	5.91457	6.09735	5.72176	0.186182	0.177919	0.256175	0.276982	0.260682	0.227435	0.326701	0.213368	0.225435	0.39393	0.507949	0.461304	8.70979	8.7028	8.68577	8.78611	9.92587	10.7475	11.4263	13.7633	14.468	14.5079	14.5102	0.121388	0.12846	0.148595	0.194967	0.215488	0.215527	0.21047	0.194787	0.194787	0.194787	0.194787	6.2482	6.24821
140810	Ttbk2	1.64787	0.88069	1.3115	0.878974	0.796453	0.798835	5.22164	3.49563	3.99801	3.51936	4.10773	4.22433	0.203588	0.16463	0.119728	0.119026	0.125381	0.151298	3.37374	2.88812	2.87314	3.17782	2.81928	2.95091	3.50175	3.49371	3.44092	3.317	2.841	2.57469	2.46402	2.40422	2.58041	2.9893	3.25936	0.134274	0.131381	0.122	0.109889	0.0945323	0.092384	0.0919748	0.0923438	0.100554	0.11641	0.12577	7.15892	6.96916
140859	Nek8	5.50843	4.00104	3.99088	3.51525	4.11442	3.71882	5.93389	4.95956	5.05656	4.22992	4.37498	4.782	0.468738	0.39693	0.331355	0.249383	0.323106	0.325656	4.58977	4.30502	4.251	4.27815	3.78572	3.80381	2.66516	2.66503	2.64978	2.58524	2.40572	2.25829	2.02165	1.73981	1.72181	1.72175	1.72175	0.318427	0.317986	0.294643	0.271154	0.265287	0.232617	0.207254	0.205711	0.20571	0.20571	0.20571	3.7619	3.74053
14086	Fscn1	8.69927	7.17079	6.73356	7.78293	7.92491	8.44365	24.1992	20.185	19.118	23.3534	21.2108	20.6324	4.49027	4.33244	4.35557	4.88839	3.49824	3.17288	4.64813	4.60473	4.67939	4.68228	3.7966	3.07955	168.428	167.924	167.048	165.873	161.518	157.252	153.668	141.545	119.574	100.834	87.8132	2.36056	2.53906	2.54994	2.49306	2.39903	2.34522	2.09159	1.71545	1.43899	1.22234	1.07927	123.118	119.034
14088	Fancc	3.09269	2.57529	2.51492	2.62538	2.37842	2.24541	7.92136	5.77968	5.88745	5.72668	5.38794	6.351	0.424146	0.507094	0.537125	0.491833	0.483738	0.397303	3.99361	3.80734	4.36628	3.66656	4.2985	4.56736	1.78	1.78	1.7796	1.77051	1.75697	1.67087	1.66094	1.65966	1.58617	1.57721	1.57721	0.255324	0.255324	0.255324	0.255312	0.207601	0.203364	0.20336	0.20336	0.193802	0.193258	0.193258	8.86879	8.86879
140887	Lnx2	5.29577	7.88713	7.95142	8.95961	8.46501	8.0534	5.04562	5.37799	6.3498	5.6481	5.06155	5.04914	0.198819	0.188611	0.237425	0.171072	0.241771	0.210872	0.463824	0.441149	0.393865	0.453754	0.632288	0.495998	3.00305	3.00304	2.99198	3.00564	3.06087	3.40168	3.56018	3.73182	3.74515	3.74525	3.74525	0.0770063	0.077034	0.0901561	0.106104	0.119152	0.113389	0.113036	0.100071	0.100067	0.100067	0.100067	3.97807	3.9786
140917	Dclre1b	2.78214	3.50098	3.23614	3.88138	3.21896	3.36145	5.00773	6.07168	6.80014	8.09204	6.47892	8.50538	0.572656	0.69035	0.655715	0.591545	0.697092	0.953223	0.533503	0.433176	0.418418	0.455026	0.655496	0.766484	1.42603	1.42707	1.46603	1.51836	1.57059	1.57649	1.57714	1.70167	1.8326	1.83261	1.83261	0.475258	0.478775	0.515602	0.524492	0.52564	0.525642	0.525649	0.583423	0.610757	0.610758	0.610758	6.31461	6.48794
14104	Fasn	8.59237	8.93767	9.17104	10.7915	9.27	9.01771	21.2534	21.0304	19.0459	21.2093	22.0629	24.4537	2.87589	4.73727	5.49653	5.27983	5.37556	5.10937	3.97903	6.09362	7.32671	7.51661	7.92065	7.86655	55.1106	54.6582	52.6631	53.8968	64.6619	71.4858	75.6807	88.7193	109.698	110.108	110.117	2.63241	3.08645	4.04698	4.66112	4.72874	4.7271	4.71133	4.70781	4.4312	4.42956	4.42951	70.8639	70.8644
14109	Fau	5.77852	5.46611	5.30271	5.33274	5.31976	4.89311	14.7884	13.8097	13.7884	14.4491	12.9903	12.3588	9.28083	6.30358	7.34108	7.49243	6.87802	6.90539	7.2334	8.0048	7.4247	7.83078	7.8485	8.62005	413.252	413.252	413.252	413.252	413.252	409.131	405.818	410.266	411.269	411.305	411.307	5.53576	5.53576	5.53576	5.53576	5.53576	4.58896	5.50971	5.50971	5.50971	5.50971	5.50971	343.592	343.592
14113	Fbl	7.40275	9.20223	9.13654	9.41153	8.47662	8.93195	6.97359	11.7475	12.2713	13.9875	10.3405	12.8371	0.873691	1.60223	1.52911	1.67359	1.64613	1.69925	2.35823	2.42081	2.76262	2.79365	2.76524	2.67085	78.5873	78.4267	78.3946	78.4136	78.4967	78.5454	78.5691	80.521	95.7457	95.8945	102.819	1.02118	1.20644	1.28923	1.32121	1.34576	1.34959	1.34955	1.46933	1.55018	1.47227	1.52402	129.921	129.921
14114	Fbln1	1.56732	1.21865	1.1111	1.16133	1.10354	1.1668	2.78927	2.96834	2.87981	2.05442	3.00994	3.49196	0.151276	0.127506	0.124383	0.125929	0.179688	0.180452	0.127311	0.139709	0.145428	0.111041	0.0691029	0.103424	4.33871	4.33871	4.33871	4.33871	4.33871	4.33871	4.33871	4.33852	4.1149	3.59275	3.70568	0.100569	0.100569	0.100569	0.100569	0.100569	0.100569	0.100569	0.100553	0.0904756	0.082674	0.0872865	4.01134	4.01134
14118	Fbn1	0.637463	0.683428	0.981822	1.4131	1.07267	1.13526	1.06852	0.83074	0.810788	0.27775	0.541391	0.506823	0.687253	1.16953	0.913789	0.7866	0.838292	0.629725	0.851774	1.77567	1.15635	1.34869	1.82759	0.978233	26.4188	26.3999	26.3577	26.3564	26.3826	26.3989	26.4083	25.2408	20.7423	16.3271	16.1976	0.496723	0.516692	0.567398	0.581402	0.584177	0.584128	0.583521	0.466216	0.336958	0.279276	0.279061	31.4296	31.4296
14132	Fcgrt	1.33447	0.974508	0.800272	0.905035	0.641966	0.687866	1.69428	1.96507	1.99034	1.85099	1.99694	0.76814	0.424939	0.470657	0.545606	0.400157	0.779827	0.65257	2.52742	2.21811	2.22758	2.04498	2.55553	2.22951	2.32416	2.32416	2.32415	2.32405	2.31395	2.21157	2.05831	1.9323	1.50447	1.41168	1.40764	0.0753617	0.0753617	0.0753617	0.0753617	0.0753617	0.0753617	0.0753617	0.0753617	0.0753617	0.0753617	0.0753617	4.93602	4.93602
14137	Fdft1	2.27871	2.02637	1.88134	2.39872	2.07435	1.99085	0.913349	1.31254	1.0405	1.3447	1.31827	2.11674	1.68967	1.41182	1.41883	1.31202	1.33251	1.38317	2.96443	3.31566	2.75993	2.32854	3.20715	2.9484	23.5067	23.5067	23.5067	23.5067	23.5067	23.5067	23.5067	23.5067	23.5044	18.6256	18.3673	1.23308	1.23308	1.23308	1.23308	1.23308	1.23308	1.23308	1.23308	1.2326	0.82261	1.07769	22.0762	22.0762
14148	Fdx1	2.07126	1.6213	1.86466	1.85626	1.76016	1.79007	5.06494	4.86083	6.77695	7.33768	4.10362	6.08982	0.28788	0.221889	0.243987	0.329187	0.256185	0.288402	0.343176	0.26363	0.264279	0.300131	0.305951	0.28554	3.38049	3.38587	3.39676	3.40056	3.39907	3.42256	3.43285	3.45304	3.5864	3.82171	4.17159	0.321923	0.325536	0.326823	0.333563	0.380792	0.381005	0.381215	0.383371	0.353326	0.333334	0.36406	6.27964	6.36455
14151	Fech	0.449151	0.36445	0.461021	0.458283	0.480743	0.5435	6.26339	4.47249	5.97307	4.9786	5.18273	6.11242	0.181088	0.153198	0.129799	0.110795	0.174512	0.137918	0.0796298	0.102994	0.130268	0.0941681	0.14523	0.0947128	5.94555	5.94527	5.93403	5.84564	5.57465	5.54112	5.52598	5.50352	5.49866	5.4985	5.49849	0.157389	0.157137	0.150784	0.127932	0.143404	0.145461	0.145546	0.145554	0.145554	0.145554	0.145554	5.0398	5.02551
14158	Fer	2.35887	2.30581	2.62496	2.10997	2.26347	2.38897	7.47508	7.13388	5.14595	4.82159	4.17418	5.79943	0.2468	0.219313	0.212682	0.224317	0.181125	0.189261	0.298646	0.406283	0.499164	0.411778	0.300042	0.290797	7.10819	7.10692	7.0927	7.02884	6.77317	6.56817	6.37509	5.71404	4.95641	4.84887	4.75192	0.186506	0.186073	0.18315	0.173852	0.133493	0.124187	0.122717	0.122224	0.121446	0.11858	0.116472	11.6182	11.5845
14173	Fgf2	0.766989	0.590998	0.661499	0.816404	0.596292	0.758635	0.461263	0.833583	0.707779	0.789415	0.673015	0.588103	0.0278482	0.179483	0.14949	0.126171	0.0688723	0.0363591	0.0391796	0.122105	0.0391796	0.122492	0.0391796	0.0391796	0.925427	0.92549	0.936344	1.00094	1.15375	1.21849	1.24568	1.26458	0.793352	0.639521	0.638628	0.0421204	0.042187	0.0485534	0.0570231	0.0575928	0.0575933	0.0575931	0.057568	0.0316224	0.0290774	0.0290666	1.60534	1.61038
14182	Fgfr1	1.9664	1.39417	2.06468	2.07541	2.00365	2.06098	9.71499	5.9356	8.79981	8.0434	4.97344	5.32997	0.72879	0.730356	0.720337	0.666767	0.541089	0.500002	1.03097	1.24389	1.07905	1.09671	0.841432	0.948813	20.3095	20.3095	20.3095	20.3095	20.3015	20.0115	19.0511	17.4891	14.4007	10.3084	10.1211	0.481337	0.481337	0.481336	0.481331	0.479731	0.447234	0.415671	0.410954	0.301915	0.241117	0.239769	25.6709	25.6709
14183	Fgfr2	2.37247	1.98189	1.95117	2.40801	2.02978	2.31187	5.6241	4.40856	2.63763	3.8534	4.11393	4.36203	0.617861	0.413397	0.441439	0.438267	0.534021	0.506934	1.21355	0.864955	1.13448	1.05833	1.13167	0.926037	11.3698	11.3698	11.3695	11.3653	10.9927	10.313	9.90676	9.46743	9.0605	8.29882	8.23048	0.338541	0.338537	0.338405	0.336868	0.291346	0.281218	0.280768	0.280653	0.263007	0.245818	0.244998	14.0865	14.0862
14199	Fhl1	1.68547	1.46949	1.83325	1.99891	1.65968	1.41109	1.59956	2.19254	2.49663	1.83494	2.19771	2.19229	0.423274	0.488813	0.503517	0.449781	0.358579	0.431052	0.736761	0.748873	0.817376	0.852665	0.633087	0.647371	46.956	46.956	46.956	46.956	46.7952	44.6774	43.0052	39.8758	36.2299	29.5924	29.0843	0.795222	0.795223	0.795223	0.795222	0.727633	0.656102	0.656082	0.656082	0.520146	0.491901	0.4919	31.0654	31.0654
14201	Fhl3	1.77108	1.37437	1.63968	1.58468	1.53742	1.98166	18.203	12.6463	12.994	15.9346	11.1068	12.9037	4.00994	4.18639	4.63388	4.27852	3.25642	3.55919	8.2668	9.0111	8.07384	8.45423	6.99832	7.01581	28.9075	28.9075	28.9075	28.9075	28.9075	28.6444	26.6934	24.5862	23.2144	16.0973	16.0596	4.39187	4.39187	4.39187	4.39187	4.39181	4.07217	3.72329	3.71871	3.2004	2.43992	2.43989	43.5159	43.5159
14208	Ppm1g	6.35837	6.80534	7.31998	8.15798	7.85879	7.58948	10.9918	14.6307	13.5146	15.5089	12.8284	11.9877	1.00127	1.39552	1.40798	1.70652	1.47605	1.52112	9.60512	7.61426	7.73146	8.06792	8.90361	8.86106	112.228	112.097	111.955	111.985	112.078	112.135	112.171	114.029	142.014	134.585	134.364	1.1848	1.32171	1.5006	1.51251	1.51345	1.51344	1.51331	1.60083	1.62201	1.56909	1.56906	108.588	108.588
14211	Smc2	1.9206	1.91146	1.41808	1.76032	1.5577	1.66627	4.10561	4.36777	4.49929	5.76743	4.42697	6.26573	0.583898	0.455996	0.376792	0.374464	0.39562	0.542081	1.12606	1.18929	1.08508	1.00587	0.96389	1.07157	45.2364	45.2383	45.0851	44.2298	41.7833	40.1931	39.1812	38.7584	42.8229	42.9467	42.9493	0.957177	0.95258	0.868987	0.763728	0.663359	0.663755	0.71172	0.860436	0.92399	0.924739	0.924861	44.0729	43.9798
14219	Ctgf	3.38705	2.32594	2.38676	2.9711	2.66586	3.08947	28.2264	29.8775	29.0393	30.4951	28.4498	24.6291	11.9757	17.4197	19.9138	17.7771	12.0934	10.9828	5.54964	7.46579	8.68451	8.26052	5.63347	5.20955	116.12	116.12	116.118	116.112	116.042	115.8	115.236	106.664	65.1786	41.9196	34.4877	10.4832	10.483	10.4823	10.4808	10.467	10.4284	10.3494	9.37061	5.56377	3.67663	3.07816	303.287	303.279
14225	Fkbp1a	4.09718	4.36991	5.0441	5.57176	4.66426	5.31135	9.24271	11.5836	11.3965	10.5912	10.5565	9.7262	1.89071	2.86148	2.99076	3.20007	3.00996	2.83664	2.58183	3.16323	4.06186	4.39122	3.94652	3.58412	20.7591	20.6393	20.6209	21.5765	22.7919	22.9832	23.0131	24.3778	27.5201	27.52	27.52	3.20022	3.34787	4.37032	4.59763	4.61402	4.61401	4.61366	4.62161	4.61814	4.61782	4.61781	77.4906	78.0752
14226	Fkbp1b	1.31229	0.750552	0.923093	1.26175	0.803104	1.17038	1.56057	1.93268	1.44609	0.171479	1.48373	1.36596	0.325907	0.243711	0.251814	0.201868	0.175823	0.322836	0.768559	0.644314	0.688562	0.605903	0.724965	1.1051	1.19842	1.23716	1.24637	1.23023	1.10701	1.00866	0.97135	0.903794	0.708435	0.666306	0.527748	0.134484	0.0924986	0.0660311	0.064676	0.0645242	0.0684502	0.0684335	0.0684212	0.0679094	0.0636173	0.0618092	2.40241	2.40209
14230	Fkbp10	8.99259	8.06077	8.15664	9.62573	7.592	9.27646	10.1215	7.26747	8.34232	7.32808	8.05785	6.93545	1.57588	1.22257	1.09563	1.08987	1.11968	0.917409	1.95399	1.98089	1.74211	1.60068	1.90681	1.96961	72.9702	72.9702	72.9702	72.9702	72.9702	72.597	70.4002	65.9051	64.2136	60.8157	56.7768	1.0405	1.0405	1.0405	1.0405	1.0405	0.945854	0.913412	0.913401	0.913397	0.810711	0.804049	44.9874	44.9874
14235	Foxm1	3.25022	3.36758	3.03531	3.42618	3.00438	3.05108	3.28944	2.97975	1.40749	2.42508	1.77634	3.03327	0.797074	0.733363	0.646161	0.559658	0.675575	0.82756	2.21499	1.91558	1.4827	1.31959	1.43021	1.68346	17.9513	17.7986	17.3596	16.805	15.2388	14.2029	13.6136	13.0427	13.1761	13.3011	13.3757	1.04042	0.967679	0.904434	0.862052	0.797536	0.772223	0.76122	0.755171	0.764956	0.771681	0.775703	31.9253	29.2333
14236	Foxn2	6.89414	6.57773	7.28549	6.74711	6.30664	6.85455	3.89202	6.14621	4.69298	4.58433	3.89703	3.91358	0.604251	0.899847	1.13842	1.22859	0.815158	0.883992	0.951632	0.930348	1.39402	1.71831	1.21128	1.16546	9.45487	9.35914	9.33495	10.1399	13.3712	13.8723	12.6692	11.2969	11.2677	11.2677	11.2677	0.69001	0.797332	1.04267	1.2054	1.17922	1.01636	0.897624	0.875004	0.874935	0.874935	0.874935	19.6214	19.7574
14238	Foxf2	1.29579	1.24644	1.20145	1.37028	1.59504	1.40065	1.19483	1.66049	1.70357	0.95914	1.50368	1.31905	0.762992	0.923057	0.91135	0.903144	0.892884	0.55155	0.349917	0.628813	0.46207	0.615381	0.504003	0.575512	3.42975	3.43964	3.49094	3.58726	3.95203	4.19859	4.30522	4.19477	3.81553	3.74118	3.72102	0.40103	0.413203	0.439057	0.465496	0.506409	0.513811	0.510657	0.414498	0.333176	0.328068	0.326593	5.91267	6.22049
14245	Lpin1	1.07522	0.953703	0.669358	0.758799	0.80465	0.616853	1.33808	1.23885	1.31702	0.99508	1.18621	0.991901	0.157896	0.122451	0.133766	0.104318	0.154284	0.0813136	1.06516	1.2614	1.10735	1.305	0.742454	0.575461	1.12318	1.12318	1.12318	1.12318	1.12318	1.12318	1.12318	1.00369	0.700171	0.700198	0.790184	0.0793046	0.0793046	0.0793046	0.0793046	0.0793048	0.0793051	0.0793046	0.0587992	0.0494289	0.0494485	0.0599646	2.29842	2.29842
14247	Fli1	0.910917	0.679617	0.473786	0.689529	0.751383	0.612174	2.00251	1.10679	2.02682	1.34789	1.41794	1.98815	0.0979788	0.0713027	0.0830324	0.0566464	0.092181	0.0647672	0.0391796	0.0391796	0.127467	0.0391796	0.0391796	0.0990709	1.33718	1.33718	1.33718	1.33715	1.30332	1.17803	1.09928	1.01015	0.959576	0.906598	0.905188	0.0566644	0.0566644	0.0566637	0.0566393	0.0469342	0.0424747	0.0424133	0.0424099	0.0394926	0.0383652	0.0383571	1.57591	1.57591
14248	Flii	3.76935	3.18061	3.34481	3.12305	3.16778	2.69983	4.81284	3.97969	4.5618	4.33197	2.9282	3.47248	0.723944	0.625469	0.537736	0.492583	0.610894	0.591944	1.74711	1.55828	1.1798	0.999655	1.20074	1.31473	26.0878	26.0539	25.9447	25.8045	25.059	24.2299	23.438	20.7961	17.2445	15.3634	14.3918	0.387511	0.376743	0.357976	0.304553	0.273045	0.263302	0.255673	0.230646	0.220348	0.224097	0.213232	17.4378	16.882
14252	Flot2	1.22364	1.14364	1.19823	1.06697	1.1629	0.742618	8.53145	6.9827	5.91411	9.48043	7.82356	9.01776	0.811202	0.901475	0.905745	0.738857	0.72362	0.781622	0.554839	0.567633	0.645018	0.428493	0.440833	0.428185	15.4349	15.4289	15.3924	15.2965	14.5504	13.4597	12.4441	10.0446	7.03367	5.00682	4.17843	0.350533	0.347434	0.338514	0.323383	0.269564	0.240922	0.237595	0.247052	0.235387	0.249028	0.219205	11.7152	11.577
14254	Flt1	1.2102	0.919233	1.10705	1.20958	1.05878	1.25564	3.16889	2.05813	2.91491	2.7053	2.11506	2.48831	0.102613	0.160912	0.151667	0.120538	0.126628	0.124037	0.127313	0.0693404	0.18866	0.0391796	0.207612	0.0970785	1.36308	1.36308	1.36308	1.36308	1.36309	1.36338	1.36677	1.54141	1.26349	0.924635	0.906793	0.0555191	0.0555191	0.055519	0.0555191	0.0555215	0.0555752	0.0560753	0.0575194	0.0423569	0.0338112	0.0334783	2.16758	2.16758
14260	Fmn1	1.00427	0.954804	0.767607	0.577966	0.637289	0.575007	0.0802378	0.239252	0.0802378	0.0802378	0.0802378	0.0802378	0.27533	0.303718	0.296271	0.302776	0.231038	0.255602	0.534895	0.835974	0.666349	0.628218	0.608746	0.46627	3.83037	3.82985	3.82113	3.76907	3.31313	3.14513	3.11915	3.11456	3.10229	2.99392	2.86576	0.272633	0.27242	0.270029	0.259748	0.225319	0.222055	0.221755	0.221681	0.220656	0.212472	0.203691	17.8233	17.8054
14265	Fmr1	1.38766	1.85085	1.84455	2.04376	2.01256	2.09089	4.56676	3.49687	3.76074	4.40249	3.51609	4.26533	0.44014	0.483772	0.542271	0.624589	0.641065	0.623185	0.75358	0.824877	0.907621	0.992795	0.99886	1.14175	17.3879	17.3447	17.4568	17.974	19.5679	20.4435	20.9004	22.3241	27.9312	28.2538	28.2661	0.914934	0.980969	1.14717	1.24735	1.28491	1.28584	1.28725	1.41248	1.41953	1.42504	1.42533	23.1928	23.6641
14268	Fn1	3.90162	3.19839	3.29738	2.95814	3.18167	3.46711	29.268	27.6028	24.1423	32.8111	28.7336	24.0813	4.6307	6.30364	6.53425	6.98648	4.50395	3.59215	5.98952	8.14151	8.34948	7.83126	6.00395	5.39725	168.964	168.964	168.964	168.956	165.76	152.661	145.109	139.288	113.292	83.1321	82.3102	2.97859	2.97858	2.97851	2.97703	2.68928	2.46043	2.45235	2.45087	1.80228	1.4567	1.45079	278.597	278.597
142688	Asb13	2.75886	2.95944	2.66282	3.3081	3.07124	3.33238	3.68849	4.80947	6.55913	5.6584	6.28191	6.75043	0.114838	0.247684	0.206117	0.332732	0.291572	0.340936	0.103551	0.107738	0.366431	0.367138	0.512516	0.55464	4.20058	4.16007	4.11918	4.12726	4.39064	4.87559	5.46828	7.81333	10.4097	11.4925	12.029	0.146225	0.168271	0.206023	0.232522	0.279127	0.317692	0.351684	0.407569	0.409656	0.430746	0.445614	6.75528	6.57754
14269	Fnbp1	2.35789	1.64954	1.97673	1.96019	1.69761	1.89198	7.3134	7.75359	6.95462	7.89442	6.3719	6.22426	0.456366	0.42308	0.434732	0.402573	0.34261	0.326854	1.4211	1.52545	1.49487	1.32816	1.31622	1.27203	3.37376	3.37375	3.37352	3.37107	3.19534	2.87888	2.79535	2.77676	2.50673	2.30862	2.29678	0.289896	0.289891	0.289799	0.289005	0.259444	0.24069	0.239019	0.23851	0.21305	0.198202	0.197343	14.9344	14.9341
14272	Fnta	2.49717	4.64715	5.60403	5.97585	5.02399	5.37944	5.06407	3.81569	2.72818	4.34967	3.67375	4.10333	0.398847	0.457664	0.472697	0.572533	0.678709	0.679089	0.966074	0.888509	0.874073	0.961819	1.37869	1.28915	44.3499	44.3631	44.4072	44.4788	44.8259	45.3175	45.9031	48.6292	53.9898	58.5474	62.4052	0.67954	0.68345	0.687878	0.692254	0.705108	0.717585	0.729714	0.775134	0.853642	0.919311	0.975129	31.938	32.1485
14283	Fosl1	7.9535	6.47982	6.37081	6.68508	6.38718	6.08135	11.4887	15.1668	16.4788	16.859	10.1784	9.04016	4.16596	6.76557	7.38724	8.0697	4.90503	4.96689	6.85667	9.66473	10.3179	11.9884	7.60265	6.8997	1.15579	1.15579	1.15579	1.15579	1.15579	1.09866	1.02663	1.01045	0.952023	0.590155	0.590153	3.88682	3.88682	3.88682	3.88682	3.8868	3.61915	3.43631	3.39804	3.13453	1.98463	1.98463	13.6366	13.6366
14284	Fosl2	8.19085	6.87286	7.47605	7.78863	7.21957	7.73378	18.6107	17.4411	15.7868	16.6187	13.6549	11.3454	4.93783	5.29639	5.46679	5.41026	4.47636	4.00443	5.98119	5.99831	5.5214	5.8949	4.99303	4.76663	27.1231	27.1231	27.123	27.0636	25.0551	24.3972	24.2272	22.3779	17.5574	17.5573	17.5573	3.81313	3.81313	3.81299	3.71026	3.39773	3.39769	3.39768	2.80905	2.46831	2.46831	2.46831	73.4001	73.4001
14287	Fpgs	6.08483	5.72454	7.00788	7.47955	6.4314	6.64127	9.7891	14.541	14.1851	15.6369	14.0418	16.5205	0.891845	1.42582	1.45747	1.47282	1.46581	1.60062	3.02484	3.71241	3.54951	3.46586	3.58943	3.81927	17.8906	17.8234	17.6212	17.2341	19.313	21.7986	23.6345	28.6327	29.3685	29.3795	29.3796	0.614738	0.686347	0.822496	0.888244	1.03648	1.03058	1.04162	1.01559	1.00921	1.00903	1.00901	22.6682	22.6682
142980	Tlr3	1.38357	0.658465	0.676144	0.59409	0.634325	0.639668	4.37618	2.00572	2.12131	2.45117	1.4296	1.86985	0.0278694	0.0192034	0.00480178	0.00480178	0.00480178	0.0397368	0.101752	0.0391796	0.0408712	0.0391796	0.0391796	0.0391796	1.15417	1.1539	1.14662	1.11217	0.967439	0.875929	0.823045	0.759002	0.751282	0.755117	0.7958	0.0787126	0.0782603	0.0713633	0.0581809	0.0513151	0.051225	0.051221	0.051221	0.0512379	0.0516744	0.0556819	1.27174	1.2541
14302	Frk	1.3026	1.15661	0.785288	0.973685	0.899239	1.05249	5.99257	3.19926	3.30782	3.2278	2.85067	3.21949	0.270795	0.222321	0.216845	0.213206	0.115022	0.125213	0.409166	0.355333	0.379428	0.528497	0.0974527	0.220787	7.66525	7.66024	7.61958	7.48415	6.40932	5.32531	4.66953	3.93391	3.34902	3.08152	3.02931	0.184323	0.182666	0.175321	0.159221	0.11091	0.0986133	0.0958935	0.0922994	0.0783702	0.0736484	0.0727497	10.7744	10.6554
14313	Fst	1.5065	1.31826	1.48682	1.60679	1.43486	1.71302	0.531331	0.576722	0.74507	1.06113	0.731893	0.825211	0.391164	0.266812	0.220702	0.2136	0.469739	0.202938	0.231749	0.133737	0.0814902	0.0877062	0.200303	0.211944	8.50537	8.50537	8.50536	8.50519	8.43588	7.92256	7.44511	6.77033	6.45024	5.221	5.01595	0.263005	0.263005	0.263	0.262905	0.243762	0.208662	0.20608	0.205873	0.191968	0.156757	0.154821	8.29375	8.29374
14314	Fstl1	1.03412	1.4711	1.25763	1.30059	1.24335	1.56015	10.9407	10.2018	10.1988	9.29058	9.87455	9.37277	2.51637	2.62751	2.51073	2.42525	2.47516	2.67823	2.86583	2.56263	2.14969	2.5247	2.70821	2.67667	146.745	146.745	146.745	146.745	146.579	141.475	137.437	129.13	124.183	90.7331	86.9271	1.2902	1.2902	1.2902	1.2902	1.20786	1.10123	1.10123	1.10123	0.975077	0.760502	0.760502	83.9905	83.9905
14339	Aktip	1.31311	0.692073	0.745449	0.57845	0.649067	0.604409	0.271761	0.0802378	0.172093	0.0802378	0.359559	0.0802378	0.942768	0.566083	0.573088	0.502057	0.54637	0.605437	0.439821	0.348242	0.305922	0.126545	0.433774	0.486752	7.50716	7.49305	7.36379	7.19494	6.79412	6.52746	6.35031	6.06802	6.00287	6.02601	6.33078	0.155017	0.146094	0.126272	0.124077	0.123892	0.123891	0.123891	0.123891	0.123917	0.124956	0.134607	6.14144	5.63028
14360	Fyn	1.33592	1.27645	1.37551	1.20369	1.32562	1.54313	5.20876	5.33572	4.41135	4.26536	3.36044	2.99453	0.268282	0.331432	0.336751	0.263844	0.217373	0.210536	0.381187	0.421666	0.434048	0.502537	0.446583	0.360897	7.71699	7.71594	7.70666	7.67302	7.34719	6.94533	6.64777	5.86925	4.80414	4.65956	4.64269	0.179934	0.179475	0.17726	0.171899	0.152241	0.146157	0.143892	0.127795	0.109925	0.108431	0.108217	8.04714	8.02031
14365	Fzd3	1.21996	0.921836	1.12478	0.743317	0.860711	0.834214	2.21491	2.8363	1.18307	2.38656	2.1175	2.30636	0.147563	0.142217	0.119422	0.141759	0.157285	0.182879	0.0521798	0.120897	0.105563	0.0638131	0.143148	0.170594	2.54832	2.54832	2.54832	2.54832	2.54838	2.56912	2.66911	2.81354	2.83556	3.05237	3.07731	0.0763865	0.0763865	0.0763865	0.0763865	0.0764109	0.0810274	0.0847641	0.0848407	0.085306	0.0921494	0.0922546	2.88394	2.88394
14375	Xrcc6	7.03353	7.47459	7.04831	7.74845	6.96589	7.18382	11.6297	12.1336	11.2466	11.8889	10.5729	9.95289	1.52102	1.79175	1.89499	1.93207	2.16934	2.26921	2.36599	3.56482	4.38013	4.40768	4.28882	4.89908	24.2096	24.2098	24.2697	24.6057	25.5106	26.0574	26.3868	27.7724	33.406	33.5414	33.5438	0.726025	0.726334	0.764942	0.804447	0.806273	0.806273	0.806284	0.908513	1.00594	1.00595	1.00595	24.5524	24.5754
14385	Slc37a4	3.53066	3.5259	3.39052	3.29697	3.54223	3.00219	9.38812	9.82758	9.59426	9.98049	9.29314	10.1924	2.43191	2.75712	3.05814	2.49379	3.00211	2.64647	1.59854	1.99192	2.03327	1.91196	1.78727	2.15501	4.40693	4.40692	4.40687	4.40431	4.24646	4.61703	4.78542	5.0604	6.38464	6.39863	6.39873	0.709373	0.709373	0.709373	0.709372	0.694153	0.628346	0.62674	0.679818	0.805779	0.805779	0.805779	7.08233	7.08233
14388	Gab1	3.00759	2.83839	2.94047	3.05177	3.22028	2.9178	5.42454	4.56682	6.58517	5.28168	5.19324	4.3166	0.261259	0.198799	0.197839	0.137212	0.204932	0.21638	0.325311	0.372676	0.414178	0.349361	0.311489	0.327468	2.39139	2.39139	2.39113	2.38614	2.16792	2.00081	1.94104	1.90984	1.90983	1.93673	2.07477	0.104268	0.104266	0.104147	0.10239	0.0840164	0.0832726	0.0832534	0.083252	0.0832827	0.0848738	0.0910556	5.08472	5.08452
14389	Gab2	0.945596	0.550851	0.815598	0.652204	0.840669	0.682093	0.650046	0.687244	0.610097	0.949319	0.314281	0.291277	0.0824306	0.0776437	0.0739531	0.0759277	0.0575261	0.0691531	0.513255	0.313854	0.291049	0.18585	0.358562	0.248466	1.17624	1.17624	1.17623	1.17602	1.14424	1.05691	1.01417	0.851013	0.691065	0.690478	0.69047	0.0823383	0.0823381	0.0823292	0.082217	0.0744597	0.0696596	0.0692852	0.054468	0.048349	0.0483341	0.0483337	2.49094	2.49093
14391	Gabpb1	4.31614	4.15685	4.52463	4.82699	4.16005	4.21234	17.8769	16.808	16.5819	17.0137	19.0884	17.845	0.967318	0.908526	0.831539	0.872824	0.831312	0.89199	0.740051	0.692268	0.788912	0.589643	0.605914	0.524749	4.01877	4.0312	4.07093	4.0478	3.69593	3.5679	3.56685	3.59372	3.19004	3.12029	3.11115	0.689609	0.689079	0.676342	0.622012	0.564919	0.566509	0.577705	0.591242	0.591332	0.591332	0.591332	11.5252	11.5034
14430	Galt	2.27333	1.24262	1.5349	1.35766	1.27915	1.40618	3.10959	3.17126	3.10379	1.9982	2.7887	3.31086	0.74044	0.54692	0.572527	0.513937	0.447961	0.583825	1.70527	1.14091	1.16466	0.898508	1.09593	1.1408	2.75019	2.75018	2.75011	2.74958	2.72273	2.59146	2.41889	2.07714	1.99559	1.99751	2.02575	0.255015	0.255003	0.254883	0.254239	0.236536	0.201696	0.188742	0.184789	0.184792	0.185528	0.189332	2.28792	2.28762
14431	Gamt	10.3879	10.1927	9.56329	12.2289	10.1101	11.2515	8.00724	8.32141	7.46677	8.44625	9.96054	10.4686	4.52423	4.99125	4.79823	5.01724	7.0773	6.51719	2.9092	1.78083	2.60325	2.69582	5.99024	5.52418	9.84725	9.84715	9.84464	9.82241	9.39049	9.49849	10.6557	15.6528	17.6551	17.928	18.573	1.22306	1.22324	1.22646	1.25274	1.84494	2.38518	2.44411	2.32068	2.35921	2.39379	2.50719	8.0033	8.00447
14432	Gap43	1.23704	0.90348	0.684593	0.57894	0.650276	0.847735	0.811461	0.814	0.555862	0.265342	0.690415	0.839399	0.130083	0.16344	0.11925	0.116764	0.0779801	0.0878768	0.232736	0.2706	0.300722	0.257758	0.12779	0.21578	23.0173	23.0153	22.9972	22.932	22.4764	21.9936	21.6507	20.9954	18.0793	13.8723	12.4956	0.16116	0.160838	0.159188	0.155539	0.112507	0.11168	0.111506	0.110043	0.0880279	0.0696403	0.0654835	18.9996	18.9571
14467	Gbas	2.05257	1.73304	1.38652	1.63177	1.3765	1.29915	4.9104	4.09846	3.27843	3.24244	3.93563	4.01736	0.316272	0.277718	0.298925	0.247292	0.282674	0.241224	0.376721	0.475386	0.355223	0.255417	0.444834	0.319974	12.1633	12.1633	12.1633	12.1626	11.9276	11.4635	11.1143	10.428	9.8079	8.60553	8.43654	0.190813	0.190813	0.190802	0.190449	0.161731	0.159185	0.159156	0.159148	0.143786	0.132211	0.13209	7.48918	7.48918
14533	Bloc1s1	3.47319	3.22253	3.48488	2.92502	3.0037	3.28518	11.7736	12.0293	12.0083	11.7726	11.8253	11.6605	3.09257	4.45868	4.03573	3.02442	2.47849	2.20437	5.67052	7.09111	6.60505	6.17466	5.92453	6.19053	29.2762	29.2762	29.2762	29.2762	29.2756	28.9863	27.8209	25.8793	25.4845	22.6817	21.8697	0.987868	0.987868	0.987868	0.987868	0.987458	0.904134	0.860806	0.860235	0.857856	0.740942	0.737021	26.3274	26.3274
14534	Kat2a	5.20696	5.90241	5.84705	5.78042	5.03157	5.58346	11.861	12.0602	11.563	12.353	12.4887	14.763	0.794482	1.11818	1.2724	1.12137	1.20174	1.37265	1.89025	2.67637	2.56832	2.31553	3.16301	2.91256	25.8707	25.8707	25.8707	25.8707	25.871	25.8746	25.9032	29.278	36.7483	37.4419	40.1642	0.736297	0.736297	0.736297	0.736298	0.736343	0.736915	0.740518	0.936463	1.05407	1.07278	1.17655	27.0414	27.0414
14538	Gcnt2	0.55135	0.795116	0.736126	0.671036	0.725685	0.611048	0.338821	0.594904	0.272503	0.294909	0.0802378	0.2088	0.117091	0.184028	0.190891	0.153425	0.112197	0.0862137	0.0692117	0.119194	0.10803	0.0391796	0.054992	0.0391796	1.12313	1.12045	1.11163	1.0981	1.04189	0.979074	0.920342	0.758405	0.625897	0.572519	0.544124	0.0450734	0.0440437	0.0428382	0.0416791	0.038595	0.0360968	0.03408	0.0289769	0.0246235	0.0227361	0.0216964	1.74258	1.69547
14547	Gdap2	3.83258	4.33224	4.48912	4.64793	4.57235	4.28209	4.33386	5.50563	5.18153	5.33407	3.73636	4.5774	0.162758	0.172501	0.192636	0.172119	0.180189	0.164334	0.226337	0.369398	0.301043	0.221301	0.149571	0.318784	7.81915	7.79473	7.71073	7.5832	7.09951	6.64353	6.29097	5.71975	5.96012	6.52138	7.12232	0.247589	0.236474	0.223931	0.213595	0.194257	0.185153	0.180758	0.178833	0.192544	0.211117	0.230118	8.00784	7.56819
14567	Gdi1	0.875688	1.03026	0.974812	0.984723	0.956922	1.08363	6.51726	4.27387	5.04923	4.65608	4.66329	4.46021	1.00213	0.702225	0.506128	0.338972	0.431434	0.626417	2.1541	1.53286	1.52564	1.51087	1.44042	1.38806	9.63658	9.57179	9.35601	9.25963	8.68744	7.77425	7.11815	5.36594	4.74115	5.09439	5.59433	0.843089	0.810641	0.762456	0.713237	0.600084	0.539076	0.506991	0.470234	0.481502	0.518552	0.570044	28.3968	27.0362
14570	Arhgdig	0.71819	0.905998	0.837669	1.32166	0.962327	1.20426	1.78438	1.22995	0.942283	1.47037	1.91213	1.59774	1.13048	1.28238	1.13619	1.82668	1.44566	1.00733	1.54823	1.57227	1.63602	1.71234	1.91974	2.11689	1.20943	1.21832	1.24826	1.29332	1.47557	1.68069	1.88157	3.16581	5.74505	6.89167	7.70443	0.0635981	0.068656	0.0743981	0.0795588	0.0928101	0.103954	0.113733	0.144746	0.187097	0.216567	0.238947	1.67779	1.84762
14573	Gdnf	6.50544	5.38811	6.26991	6.12534	5.73083	6.18096	8.02464	6.48397	6.82414	5.71647	7.3676	7.84335	2.12684	1.99683	1.6488	1.50166	1.99256	2.05597	3.60398	3.6384	3.14638	2.97711	4.06561	3.56974	12.7913	12.7913	12.7913	12.7913	12.7851	12.6926	12.542	11.2365	8.57007	8.55164	8.55129	1.93725	1.93725	1.93725	1.93722	1.93316	1.90174	1.8842	1.58966	1.29646	1.29513	1.2951	30.1067	30.1066
14579	Gem	2.45124	1.69861	1.36459	1.59028	1.73715	1.36101	5.69126	4.68944	4.82105	3.86743	3.42349	4.69373	0.401548	0.277472	0.290344	0.290956	0.404806	0.23748	0.665394	0.475047	0.439791	0.492856	0.309931	0.43142	7.38562	7.36566	7.28573	7.14889	6.52829	5.83756	5.24701	4.14029	4.27708	5.01302	5.84344	0.426128	0.412804	0.392793	0.372087	0.318374	0.28212	0.259386	0.23048	0.253035	0.297731	0.345784	10.2162	9.78454
14583	Gfpt1	4.12323	3.49946	3.22094	3.32361	3.2643	2.66406	8.82968	8.35266	5.02373	7.765	7.13042	6.92324	0.861526	0.718421	0.748831	0.717971	0.584581	0.617247	1.54493	1.44374	1.45088	1.45932	1.1132	0.954453	15.016	15.0066	14.8849	14.7333	14.4091	13.568	12.2663	10.811	10.7156	10.7152	10.7152	0.429544	0.42383	0.406063	0.404625	0.39858	0.331227	0.308413	0.306519	0.306517	0.306517	0.306517	21.0607	20.6532
14594	Ggta1	0.676477	0.411583	0.567632	0.847619	0.750646	1.01816	0.424561	0.356564	0.0802378	0.0802378	0.0802378	0.102724	0.0957364	0.073268	0.0758504	0.049296	0.0756645	0.0972633	0.260718	0.255068	0.238368	0.21019	0.213611	0.200273	3.33216	3.33542	3.34814	3.37063	3.47796	3.59435	3.67583	3.57865	2.90707	2.54755	2.38176	0.0838802	0.0851089	0.0869211	0.0888612	0.0935999	0.095605	0.0953846	0.08615	0.0699477	0.0626751	0.0592461	3.38412	3.44361
14595	B4galt1	3.60833	3.22131	2.84175	2.42373	3.21055	2.82177	11.4922	8.31318	8.71183	8.39785	7.32799	8.75832	0.475123	0.472475	0.396241	0.316242	0.295109	0.340237	0.560401	0.436099	0.617669	0.607516	0.639149	0.424561	14.2153	14.2085	14.2001	14.1926	14.1751	14.1552	14.0335	12.363	11.7596	11.7327	11.7315	0.254391	0.253038	0.253026	0.253025	0.252986	0.251633	0.239093	0.210055	0.209941	0.209942	0.209942	11.0748	11.0155
14600	Ghr	3.16008	2.54021	2.94078	3.38914	2.86577	3.65092	4.29441	4.94342	5.00194	5.29763	4.84763	3.79683	0.271034	0.431184	0.355204	0.339639	0.228402	0.303461	0.234007	0.609721	0.44731	0.323091	0.529707	0.565105	10.7931	10.6905	10.5778	10.6353	10.6664	10.6253	10.5532	10.2689	9.03707	7.35777	6.37157	0.731866	0.674505	0.648039	0.638402	0.628723	0.623031	0.616523	0.575593	0.463851	0.381105	0.334248	17.6024	15.9566
14609	Gja1	5.32273	4.00088	3.8098	4.17943	4.07831	4.74263	6.27822	7.23725	5.71598	6.2814	4.45931	6.16484	1.69222	1.67281	1.46537	1.33021	1.19112	1.33815	1.36627	1.41902	0.894409	0.844451	0.986173	0.978595	53.8907	53.8455	53.3035	52.2921	49.6714	47.9167	46.5092	42.2021	41.0194	40.9831	40.982	0.379037	0.370404	0.331787	0.318075	0.315474	0.313342	0.304447	0.288482	0.288246	0.288245	0.288245	47.3965	46.1578
14615	Gjc1	1.75888	1.78614	2.08942	2.2669	2.06938	2.47435	2.60936	2.85125	3.44457	3.58443	4.01296	4.04628	0.75817	0.900578	0.697508	0.768037	0.608427	0.762822	1.17838	1.14575	0.954831	1.04328	0.787766	0.864895	14.4692	14.4416	14.3612	14.257	13.8801	13.4467	13.0062	11.7354	10.9689	10.7939	10.7304	1.52564	1.49808	1.47499	1.45751	1.40696	1.35675	1.31266	1.20922	1.15132	1.13648	1.13072	22.2547	21.6798
14619	Gjb2	0.544968	0.422134	0.290949	0.37424	0.471086	0.505493	0.460795	0.819306	0.849155	0.25463	0.209003	0.386128	0.170919	0.255741	0.225043	0.107864	0.130138	0.217093	0.0391796	0.12187	0.107818	0.180057	0.114697	0.0837016	2.31361	2.31363	2.31379	2.31471	2.32742	2.34297	2.35425	2.31697	1.27772	0.830932	0.772018	0.0331321	0.0331372	0.0331832	0.0333586	0.0340383	0.0341259	0.034091	0.0313399	0.0133192	0.011151	0.0109648	1.57043	1.57076
14620	Gjb3	4.39057	4.07628	3.42374	4.04467	3.95235	3.4852	7.1642	5.81616	8.8724	8.589	6.88389	5.62171	2.97994	2.68011	2.84355	3.67608	2.14971	2.02736	1.7909	1.56287	1.92664	1.59107	1.57033	1.27136	50.3059	50.2503	50.5822	51.0495	52.3932	53.4143	54.2827	54.3397	41.3275	30.3518	26.7963	1.53644	1.75157	1.84279	1.87561	1.89165	1.88477	1.70506	1.36461	0.912101	0.72566	0.68023	31.1551	33.0634
14621	Gjb4	6.59153	5.34461	5.20117	4.96844	5.3734	5.02857	8.2986	8.95852	7.63601	8.76443	5.89934	3.68984	1.79892	1.59161	1.6535	1.40473	1.04547	0.527343	0.0391796	0.0391796	0.0391796	0.0391796	0.110014	0.05519	5.99989	5.96457	5.88683	5.80568	5.58275	5.35567	5.09139	3.77795	2.0069	1.3901	1.15186	0.381707	0.364006	0.355724	0.351188	0.338637	0.322175	0.302101	0.215381	0.118092	0.0850293	0.0718059	10.0039	9.46224
14629	Gclc	2.35654	2.79711	3.18909	3.01707	3.04989	2.29522	3.269	4.48468	6.13698	6.6269	6.42201	4.93397	0.459355	0.815969	0.954864	1.05734	1.11446	0.973307	0.606838	0.477679	0.828948	1.15856	1.08188	0.975418	25.6028	25.6232	25.9947	27.5084	34.3046	39.0527	42.0212	46.17	46.8803	46.8962	46.8965	1.11685	1.13992	1.3674	1.77395	2.03796	2.0451	2.04563	2.04572	2.04573	2.04573	2.04573	24.3737	25.3302
14630	Gclm	2.13538	1.97983	1.77282	1.81509	1.75007	1.90275	4.95449	3.20206	2.71375	3.47044	3.17328	4.8886	0.567966	0.624976	0.483517	0.566417	0.536833	0.587661	0.872368	0.998568	0.931271	0.938441	0.745555	0.775507	25.2094	25.2094	25.2095	25.2097	25.2113	25.216	25.2259	25.3609	26.4857	29.128	32.8551	0.555391	0.555394	0.555403	0.555419	0.555533	0.555788	0.556234	0.560916	0.592033	0.656901	0.741798	30.474	30.4742
14651	Hagh	4.402	6.21932	6.11915	6.37594	6.55921	6.52909	4.27744	4.64878	4.75925	4.47708	4.57241	4.20501	0.310805	0.326924	0.298757	0.256713	0.281187	0.21685	0.282018	0.227943	0.319307	0.228409	0.381197	0.355988	10.2629	10.2629	10.304	10.518	11.0357	11.3942	11.6424	12.0726	12.1942	12.2006	13.1651	0.158351	0.158352	0.18333	0.188253	0.188255	0.188255	0.188255	0.188255	0.188255	0.188255	0.240804	7.54586	7.54587
14660	Gls	3.8109	5.03589	4.90711	5.01538	4.92845	5.01117	11.6271	11.7919	12.0407	12.2777	12.3754	12.8137	1.01265	1.46155	1.42555	1.62677	1.53262	1.79324	0.582507	0.893852	0.590909	0.504989	0.672203	1.05035	24.8381	24.8131	24.759	25.2387	27.2247	28.425	29.0974	29.9816	35.8244	35.9006	35.9012	3.02226	3.04827	3.26016	3.70053	3.84235	3.84389	3.84382	3.75512	3.47209	3.46758	3.46753	28.8595	28.8608
14667	Gm2a	1.28333	1.15436	1.02633	0.949703	1.08035	0.870723	1.32973	1.27347	0.998505	1.22332	1.13839	0.448871	0.0746547	0.0588153	0.0465973	0.00480178	0.0724421	0.0344505	0.0391796	0.0391796	0.102915	0.0391796	0.0604276	0.0391796	6.33045	6.33045	6.33045	6.33045	6.33045	6.33045	6.33045	6.33022	6.0003	5.36216	5.89391	0.0380569	0.0380569	0.0380569	0.0380569	0.0380569	0.0380569	0.0380568	0.0380473	0.0325904	0.0315814	0.0405909	2.65801	2.65801
14679	Gnai3	3.1072	2.64474	2.77734	2.96003	2.75412	2.77708	11.0717	10.666	10.2446	11.2816	9.14801	9.40529	0.704165	0.737765	0.681206	0.696434	0.544566	0.631041	1.57826	1.53404	1.20836	1.01891	0.970258	0.864147	74.3215	74.3213	74.2194	73.614	71.7487	68.2239	65.4044	60.2546	58.6153	58.5097	58.5029	0.771345	0.771219	0.734216	0.705024	0.66497	0.607456	0.60717	0.607166	0.607166	0.607166	0.607166	50.9446	50.9304
14682	Gnaq	2.00344	1.46757	2.05165	1.71958	1.33205	1.33786	0.871799	1.231	0.647425	0.846332	0.62644	0.747199	0.485501	0.49979	0.530468	0.587993	0.536857	0.497372	0.651792	0.794629	0.702642	0.834969	1.03646	0.888975	10.9755	10.9755	10.9755	10.9755	10.9755	10.9755	10.9755	10.9704	10.1761	8.71735	8.52614	0.601852	0.601852	0.601852	0.601852	0.601852	0.601851	0.601847	0.601179	0.53791	0.472924	0.467116	15.3271	15.3271
14696	Gnb4	1.61782	1.33527	1.40714	1.32947	1.20626	1.45126	1.32601	1.16906	0.800037	0.763736	0.690891	0.719257	0.295987	0.383438	0.304466	0.342463	0.318812	0.271298	0.670692	0.690236	0.643402	0.72178	0.701908	0.680723	5.28149	5.24956	5.18441	5.12816	5.01735	4.96024	4.93043	4.68717	4.39057	4.38794	4.38792	0.397557	0.373781	0.369119	0.368829	0.36881	0.368801	0.368657	0.338685	0.330304	0.330295	0.330295	7.00723	6.50871
14708	Gng7	0.624374	0.551461	0.509956	0.62911	0.678805	0.883465	1.63499	1.64531	2.00877	1.54998	3.40873	3.29692	0.321096	0.327626	0.353837	0.281016	0.412722	0.37836	0.413435	0.244324	0.505637	0.312682	0.396955	0.352534	0.963844	0.95108	0.939832	0.932037	0.92937	0.962706	1.03021	1.48594	2.10397	2.29556	2.36145	0.0205552	0.0264512	0.0282198	0.0284692	0.0303173	0.0334144	0.0372677	0.0383273	0.0400121	0.0425836	0.043539	1.08156	1.00979
14719	Got2	5.56221	5.40309	5.74475	6.8867	5.66777	6.62579	4.70802	5.535	6.30872	7.06012	6.42031	6.57754	0.527496	0.687703	0.752037	0.775641	0.794671	0.94402	0.994796	1.23633	1.4875	1.57435	1.89075	1.79378	103.699	103.674	103.561	103.491	103.513	103.554	103.588	105.721	127.607	131.084	133.904	0.532987	0.558439	0.677899	0.762735	0.792596	0.793159	0.791708	0.807692	0.814029	0.812724	0.847435	52.7122	52.7122
14731	Gpaa1	5.71863	5.26704	4.7939	4.72891	5.16456	4.79964	14.2243	13.5797	11.8335	12.1744	14.1278	14.9996	1.48198	1.50845	1.5151	1.84236	1.85531	1.74239	1.25273	1.48969	1.03149	1.02284	1.38512	1.42146	30.1788	30.1788	30.1788	30.1788	30.1433	29.0558	27.6587	27.6559	27.77	27.7748	27.775	2.56741	2.56741	2.56741	2.56737	2.52144	2.08211	2.20181	2.36286	2.36292	2.36292	2.36292	23.8125	23.8125
14735	Gpc4	1.48502	1.26936	1.17757	1.48177	1.08565	1.51929	1.40305	1.35326	1.10435	0.496687	1.52409	1.52723	0.236904	0.217205	0.226571	0.226671	0.243011	0.206027	0.301952	0.219539	0.359382	0.250517	0.276875	0.172034	9.74828	9.74828	9.74828	9.74828	9.72514	8.98019	8.53312	8.11826	7.37505	5.19989	5.18817	0.114479	0.114479	0.114479	0.114479	0.109867	0.0950217	0.0950197	0.0950197	0.0735082	0.0609267	0.0609265	13.6292	13.6292
14739	S1pr2	5.10221	5.31746	5.69881	6.74534	5.40262	6.01054	9.24027	10.1652	11.1736	10.0536	8.62378	9.07366	2.79982	3.02386	3.22929	3.08314	3.01076	3.15356	1.45794	1.61876	1.82463	1.88264	1.87233	2.10142	15.188	15.1569	15.1012	15.1322	17.3282	18.0248	18.2583	19.3082	17.7064	15.1444	13.5922	0.303046	0.337727	0.415559	0.420254	0.435602	0.454046	0.442611	0.363668	0.308963	0.266732	0.244434	11.2953	11.337
14745	Lpar1	2.6299	1.77441	1.83551	1.67419	1.41978	1.63599	6.79573	6.61157	7.18307	5.41244	5.01549	5.02041	0.55139	0.567583	0.479487	0.409491	0.368102	0.434318	0.507244	0.503252	0.551364	0.562272	0.429282	0.383172	14.6483	14.6479	14.642	14.6079	13.9698	13.0429	12.3866	10.9333	9.12552	8.98426	8.97596	0.294688	0.294509	0.292918	0.286341	0.24229	0.230523	0.228251	0.204875	0.181373	0.180626	0.180564	14.825	14.8129
14751	Gpi1	1.38628	1.87954	1.97583	1.8534	1.88426	1.80611	7.54962	8.39514	7.89824	8.64043	7.47931	8.77296	0.692657	0.946531	1.02747	0.889449	1.00853	1.09827	0.637496	0.785259	0.920547	0.824818	0.938634	0.934979	63.3896	63.2979	63.1825	63.2097	63.2725	63.3322	63.8488	68.0404	69.0718	69.2247	74.1208	0.745751	0.839373	0.982089	0.982431	0.982462	0.985612	1.03146	1.07102	1.07105	1.07173	0.968595	54.157	54.157
14773	Grk5	5.8827	4.88369	5.33326	5.27489	5.04225	5.07538	10.4982	6.63044	8.60278	8.31868	7.48091	7.08214	0.17812	0.203787	0.211151	0.186218	0.119934	0.131861	0.265151	0.214972	0.309922	0.167799	0.0809994	0.10039	5.01045	5.01016	5.00617	4.98784	5.13179	5.02941	4.86608	4.64042	4.62209	4.62182	4.62201	0.208211	0.208092	0.207534	0.206008	0.19325	0.180876	0.175974	0.17322	0.17305	0.173046	0.173055	9.49942	9.49242
14775	Gpx1	5.39853	4.9669	4.51315	5.26547	4.7383	4.92089	25.6265	23.2418	20.4533	23.337	25.0975	23.2054	14.2094	11.2691	8.76738	10.0153	14.3306	16.2662	3.66046	3.00711	3.1565	3.04651	3.5143	2.82082	112.079	109.682	107.165	104.934	105.694	105.634	101.778	96.0571	93.6046	93.3475	93.3205	1.66304	1.66304	1.66304	1.66304	1.66304	1.22654	1.38433	1.38436	1.38436	1.38436	1.38436	63.1996	63.1996
14782	Gsr	2.84627	5.80376	6.06301	6.73354	5.67333	6.115	5.14099	5.65533	4.25413	5.37802	5.27348	6.09324	0.631565	1.05006	1.34795	1.41308	1.25584	1.39993	0.923384	1.06027	1.34418	1.86098	1.68874	1.83947	40.9028	40.8321	40.7896	41.8151	46.5402	50.1479	52.8259	61.1355	73.4524	74.703	74.8179	0.60946	0.68322	0.924516	1.19012	1.25513	1.25525	1.25555	1.21367	1.15334	1.15337	1.15337	24.4191	24.489
14791	Emg1	7.633	8.55421	8.77283	9.47204	8.28985	7.91611	9.12593	11.315	11.6018	12.326	12.5353	10.7012	1.95264	2.108	2.04023	2.10889	2.4157	2.25048	3.38681	4.11227	3.89863	3.90033	3.86509	4.16878	92.3588	92.3298	92.3316	92.3344	92.3412	92.3462	92.3497	92.3594	107.503	110.036	112.776	2.81264	2.84396	2.84517	2.84521	2.84521	2.84521	2.84521	2.84621	3.13952	2.99315	3.17273	60.2924	60.2924
14792	Lpcat3	1.74191	1.31393	1.30938	1.34517	1.53835	1.28909	2.66852	3.84102	4.41894	3.34799	3.56694	2.7635	0.719332	0.849786	0.784814	0.861522	0.810968	0.822892	2.21626	2.28325	2.36722	2.40205	2.55071	2.51471	10.288	10.2879	10.2578	10.5254	10.371	9.59437	9.30403	9.42843	9.17471	8.22771	8.19925	0.150792	0.150994	0.187219	0.190476	0.173136	0.173357	0.177277	0.182054	0.173013	0.158303	0.158125	14.6893	14.6893
14793	Cdca3	7.23041	7.49428	6.3613	6.60408	5.85663	6.36026	5.00654	3.92014	3.11238	2.81879	3.33022	3.9648	0.767766	0.155733	0.228855	0.300919	0.32135	0.228344	1.16562	0.813634	0.465262	0.323552	0.683169	0.70276	43.1677	43.0155	42.3619	41.537	39.5171	37.639	35.5961	28.332	25.0188	24.848	24.8601	1.13734	1.0362	0.929574	0.903326	0.704381	0.666457	0.605345	0.521064	0.637112	0.855086	0.855195	29.3086	25.7614
14794	Spsb2	3.18028	2.24208	2.22365	2.17183	2.23706	2.32757	7.75319	7.19395	5.9546	4.91427	6.7059	6.35091	8.88591	8.53477	7.06365	7.69574	8.65479	12.3133	6.14631	5.25418	4.56588	4.39968	5.65855	6.25575	2.20984	2.30221	2.13139	2.02875	1.90392	1.67141	1.58727	1.56464	1.5646	1.56477	1.85479	0.521752	0.521752	0.521752	0.521752	0.508986	0.435328	0.434672	0.43467	0.43467	0.434754	0.536479	5.85399	5.85399
14809	Grik5	1.12829	0.961454	0.846981	0.819749	0.912538	0.870968	1.44714	0.40706	0.855461	0.566768	0.649418	0.443484	0.576572	0.396852	0.421119	0.334377	0.443701	0.452308	0.263646	0.252338	0.444167	0.370284	0.405817	0.31895	2.52724	2.51286	2.50165	2.49474	2.28141	2.00492	1.94992	1.93949	1.93949	1.93949	1.93949	0.176401	0.173731	0.173703	0.173347	0.142743	0.135552	0.135385	0.135376	0.135376	0.135376	0.135376	9.49176	9.3477
14815	Nr3c1	5.07909	4.35617	4.07668	4.08303	4.53827	4.48433	2.27783	1.3985	1.92991	1.27666	1.35529	1.31161	0.319134	0.387373	0.344203	0.383098	0.304085	0.339179	0.711038	0.819059	0.771543	0.618376	0.756319	0.673871	8.86194	8.87163	9.0404	9.20343	9.57042	9.91744	9.61595	9.23283	7.24855	7.24379	7.24378	0.547183	0.547183	0.547183	0.547183	0.547183	0.509594	0.493722	0.445778	0.383079	0.383079	0.383079	15.8976	15.8976
14824	Grn	1.79183	1.77604	1.43957	1.95124	1.36971	1.87683	4.7458	5.25746	4.45364	3.41901	3.43431	4.63733	1.01242	0.623617	0.565173	0.511555	0.458331	0.528349	0.449523	0.33988	0.345969	0.126232	0.426346	0.309276	15.3035	15.3035	15.3035	15.3035	15.3034	14.9857	13.972	12.4385	11.7671	10.2925	10.2429	0.39382	0.39382	0.39382	0.39382	0.39379	0.322208	0.312175	0.312169	0.280245	0.263555	0.263555	13.6851	13.6851
14825	Cxcl1	2.77399	4.3063	4.61897	4.84717	4.36894	4.8963	12.9154	12.9607	15.399	16.7547	19.3757	14.9933	5.34507	4.91474	5.01598	3.80013	6.70371	6.39058	3.36886	2.57581	3.32035	3.80583	3.86518	2.74052	48.6392	48.6393	48.6412	48.6547	49.4713	55.2775	63.8046	51.653	44.6299	44.5552	44.5512	8.01452	8.01471	8.01706	8.03044	8.53534	10.5254	11.5307	7.86559	7.34819	7.34136	7.34089	100.628	100.634
14860	Gsta4	0.557481	0.712498	0.340622	0.616677	0.497713	0.631123	0.663995	0.438051	0.646726	0.279355	0.484396	0.475872	0.0637693	0.0187496	0.0603825	0.0673662	0.0470663	0.0627437	0.178289	0.0688713	0.0750441	0.0592469	0.1581	0.0391796	19.9301	19.9301	19.9301	19.9301	19.9301	19.9301	19.9301	19.9301	21.5405	22.7061	24.6383	0.0816843	0.0816843	0.0816843	0.0816843	0.0816843	0.0816843	0.0816843	0.0816843	0.0935319	0.093532	0.135147	12.0192	12.0192
14862	Gstm1	0.917597	0.720135	0.643786	0.623773	0.742267	0.68481	2.27665	1.455	1.53891	1.41476	2.27551	1.08256	0.773832	0.398615	0.47209	0.440521	0.910883	0.751449	0.0892021	0.116055	0.103098	0.205955	0.228684	0.148762	3.18432	3.18432	3.18432	3.18432	3.18432	3.18432	3.18432	3.15312	2.6465	2.62448	3.1603	0.0881508	0.0881508	0.0881508	0.0881508	0.0881508	0.0881508	0.0881508	0.0818168	0.0726188	0.0726548	0.105637	2.59985	2.59985
14870	Gstp1	2.1849	2.05342	2.35825	1.95617	2.47647	2.00309	7.87619	8.28244	8.9114	9.82571	11.2585	10.0246	0.868559	1.36854	1.10573	2.00616	1.95315	1.29316	0.731892	1.00538	1.17541	1.30633	1.16207	1.38097	21.0649	21.0649	21.0651	21.0659	21.0398	20.8859	21.0705	23.1398	27.1478	29.3262	31.7964	0.687476	0.687503	0.687612	0.687867	0.729689	1.00045	1.02456	0.934421	0.836172	0.896829	0.975548	13.4077	13.4086
14886	Gtf2i	6.59639	6.17695	6.4781	7.27712	6.6706	6.93959	10.2345	10.088	9.03746	9.13587	8.97456	8.8975	1.12448	1.02463	1.13072	1.15775	1.36249	1.3056	2.15279	1.88137	1.76641	1.68613	2.60325	2.39594	22.7533	22.7533	22.7533	22.7533	22.7555	22.8303	23.4718	26.5119	26.7381	26.8247	28.1041	0.527844	0.527844	0.527845	0.527846	0.528173	0.536141	0.577311	0.620091	0.620327	0.623334	0.663482	36.0678	36.0678
14897	Trip12	1.87198	1.40413	1.4832	1.86683	1.73186	1.59948	3.70117	3.62431	2.89123	2.77555	2.10921	2.85574	0.726843	0.67161	0.627071	0.592561	0.524485	0.538598	1.13167	1.18612	1.22875	1.04233	1.15694	0.91183	27.7818	27.7601	27.5528	27.6055	27.2888	26.0814	25.0547	23.4449	23.2862	23.7179	24.6848	0.636987	0.63065	0.612186	0.582267	0.501897	0.473885	0.465386	0.460267	0.46296	0.473671	0.495532	34.5663	34.1515
14904	Gtpbp1	5.1004	4.41529	4.27368	4.11686	3.73428	3.48356	6.25174	5.4958	5.86861	6.03192	5.04988	4.48357	0.420371	0.598214	0.653844	0.60025	0.586474	0.497983	2.26939	3.17965	3.96271	3.83123	3.14202	2.38509	14.6705	14.6793	15.1186	15.6319	16.706	16.6385	16.4719	16.2612	16.2326	16.2322	16.2322	0.464607	0.480424	0.578505	0.579723	0.566535	0.514136	0.514065	0.514065	0.514065	0.514065	0.514065	15.493	16.8156
14923	Guk1	4.52477	4.825	5.34824	5.57789	5.49318	5.48706	8.06922	9.24185	10.7526	10.3078	8.03972	9.44849	0.389912	0.687213	0.777329	0.785444	0.880907	0.703214	0.664644	0.777848	0.960564	1.11053	1.11422	1.05789	36.3085	36.1436	35.9785	36.0155	36.1074	36.1738	36.2439	39.0038	45.0073	45.5826	46.335	0.549361	0.717229	0.920456	0.922405	0.92247	0.92309	0.925864	0.941896	1.00376	1.0082	1.0329	27.2565	27.2565
14924	Magi1	4.06406	4.98968	4.92928	5.60064	5.12298	5.57619	5.207	5.83042	5.04427	5.63355	5.43528	6.20181	0.223612	0.236649	0.239774	0.250973	0.255506	0.220129	0.318363	0.470047	0.421599	0.519418	0.428054	0.604303	2.24832	2.24832	2.24832	2.24824	2.26172	2.35245	2.36095	2.36447	2.14787	1.81484	1.81461	0.246105	0.246105	0.246105	0.246105	0.244625	0.228944	0.228844	0.228843	0.195204	0.175627	0.175623	6.17846	6.17846
14936	Gys1	5.34107	5.54722	5.48467	5.30921	5.55039	5.13431	4.38432	5.99621	4.1055	4.73383	4.25227	3.14994	0.63971	0.681075	0.606887	0.577016	0.532208	0.572464	13.9986	12.8143	12.0783	13.2869	13.449	12.7721	6.73839	6.69426	6.60197	6.50021	6.16836	5.8287	5.54503	5.05421	4.95077	4.9433	4.94165	0.214224	0.201235	0.19563	0.191664	0.179435	0.169957	0.164549	0.158501	0.15729	0.157138	0.157098	8.9248	8.33373
14950	H13	5.18481	3.52027	3.91311	4.13596	4.26436	3.86718	9.86152	8.71664	10.4639	10.0039	7.86971	6.75899	2.12738	2.01047	2.05539	1.9948	1.84557	1.69539	1.54961	1.40991	1.51313	1.8802	1.32259	1.25262	11.196	11.196	11.196	11.196	11.1286	10.4015	9.94826	9.62419	9.07316	8.08077	8.07232	1.41327	1.41327	1.41327	1.41326	1.34948	1.21595	1.21355	1.21351	1.09946	1.01919	1.01897	19.2914	19.2914
14979	H2-Ke6	3.03184	2.54345	2.93414	3.07796	3.21024	2.75951	16.7004	14.7746	15.432	14.9329	18.181	16.7539	3.02592	3.24019	3.99415	3.48442	6.8401	5.25902	2.88545	2.65609	3.29887	2.92007	3.47967	3.27277	1.46725	1.46725	1.46725	1.46725	1.46725	1.64888	2.02236	2.28135	2.28788	2.53513	2.63713	0.329662	0.329662	0.329662	0.329662	0.329663	0.488339	0.513628	0.514043	0.514043	0.590818	0.592527	2.71961	2.71961
15078	H3f3a	3.16526	2.18135	2.44631	2.37914	2.19587	2.26989	8.186	7.80864	7.56795	6.49918	6.49828	6.4783	1.53503	1.22122	1.06021	1.15582	1.11809	1.06376	2.31935	1.62467	1.61976	1.19458	1.70407	1.51818	96.5654	96.5608	96.4229	95.402	91.658	88.9591	87.0796	83.0083	78.7968	78.409	78.3728	1.29211	1.27851	1.05711	0.936259	0.914342	0.914059	0.913804	0.887921	0.866352	0.923692	1.1007	70.4043	69.9573
15107	Hadh	1.16889	0.837627	0.878144	1.18449	1.25868	1.22246	2.17579	1.91555	1.92951	1.27599	1.4654	2.12688	0.285664	0.198835	0.233698	0.195588	0.328255	0.305437	0.493153	0.368404	0.511633	0.283395	0.551501	0.3378	6.87219	6.87219	6.87219	6.87219	6.87219	6.87219	6.87219	6.90509	7.74033	7.75027	8.10994	0.176663	0.176663	0.176663	0.176663	0.176663	0.176663	0.176663	0.181	0.199224	0.199258	0.217292	8.54865	8.54865
15108	Hsd17b10	1.60564	1.74286	1.4669	1.37899	1.54496	1.47023	3.49984	5.29399	4.72597	5.54939	3.21077	3.25489	0.179532	0.668479	0.56497	0.738727	0.58572	0.624796	0.324431	0.449047	0.51901	0.367854	0.429609	0.482127	54.5952	54.5952	54.5952	54.5952	54.5952	54.542	53.5702	51.6104	50.9937	48.4504	44.8146	0.456488	0.456488	0.456488	0.456488	0.456488	0.444209	0.426029	0.426026	0.426026	0.376164	0.372586	37.6829	37.6829
15159	Hccs	1.8365	1.76603	1.68295	2.2043	1.75677	1.62897	3.54639	3.66284	4.24149	4.10845	3.76027	4.38669	0.109652	0.130179	0.122065	0.155628	0.120513	0.196437	0.0391796	0.0391796	0.0391796	0.0391796	0.0391796	0.0391796	11.4879	11.517	11.6315	11.7438	12.0029	12.1745	12.2884	12.5692	13.933	14.0617	14.067	0.12103	0.12814	0.131669	0.131804	0.131814	0.131814	0.131823	0.135678	0.14813	0.148203	0.148204	9.46047	10.0792
15199	Hebp1	1.52383	0.945665	1.01305	1.11167	0.996097	1.16034	2.80233	3.43456	3.86546	2.59924	3.3576	3.23296	0.0820995	0.0799242	0.0951947	0.122988	0.122708	0.160989	0.0452098	0.103478	0.0429444	0.0391796	0.233868	0.0391796	6.25586	6.25586	6.25586	6.25586	6.30274	6.62524	6.85147	7.22986	7.32831	7.33291	7.60733	0.0443582	0.0443581	0.0443581	0.0443582	0.0502207	0.0519961	0.0519962	0.0519962	0.0519962	0.0519983	0.0580389	4.81817	4.81817
15200	Hbegf	5.18715	4.07987	4.03204	3.90357	4.53713	3.95872	16.7026	19.6286	18.6679	19.1065	13.7246	15.4116	2.11602	5.23961	6.23201	6.0972	2.95883	2.53983	2.1235	4.50534	5.255	5.89052	2.61344	2.50496	25.5228	25.7801	26.5002	27.2566	28.3337	27.8535	26.681	21.6739	15.9612	12.9892	11.1338	3.58445	3.84589	4.03928	4.10227	3.99818	3.78582	3.57136	2.90481	2.17673	1.78629	1.5384	53.7867	59.3842
15204	Herc2	1.06924	1.39606	1.3373	1.18512	1.24643	1.02707	8.24456	8.09101	9.26874	9.00402	6.48179	7.45468	0.254135	0.198942	0.203013	0.183287	0.203837	0.196726	0.592658	0.487297	0.49281	0.564757	0.470502	0.591925	7.988	8.11608	8.1047	8.07943	7.78068	7.23534	6.95824	6.73105	6.72034	6.71819	6.72031	0.245621	0.232109	0.224888	0.224382	0.188998	0.184432	0.185889	0.185869	0.185873	0.203712	0.203894	14.4897	13.5552
15205	Hes1	5.84553	5.04668	5.69181	5.26651	4.88175	4.96163	7.08595	10.222	9.83609	13.3742	7.78024	5.68135	2.64056	4.29714	5.4037	6.66137	1.77031	2.38818	1.41093	1.96919	2.37815	2.58939	0.993372	1.06611	4.41329	4.44587	4.63036	4.98984	6.18637	6.39227	5.83608	3.50619	2.66471	2.59379	2.5788	0.54065	0.601878	0.740243	0.872732	0.918975	0.723821	0.565659	0.363745	0.322168	0.317066	0.31571	5.24699	6.51782
15258	Hipk2	0.862807	0.998878	1.0395	1.23856	0.956489	1.01888	1.21485	0.426682	0.744324	0.415674	0.336533	0.612163	0.281341	0.325877	0.297189	0.2788	0.269489	0.260375	0.247737	0.271879	0.347045	0.467802	0.349329	0.350362	4.32565	4.32565	4.32564	4.32531	4.24081	4.22864	4.22005	4.21556	3.68086	3.19895	3.19384	0.244908	0.244908	0.244903	0.244755	0.207555	0.196255	0.196099	0.196076	0.163763	0.148686	0.14856	12.6629	12.6629
15259	Hipk3	3.0291	3.91438	4.47429	3.99275	4.11484	4.19889	8.33203	7.22172	7.53193	6.01196	6.41259	7.36768	0.466665	0.500876	0.543889	0.650634	0.586286	0.644998	0.820236	0.568252	0.615722	1.05361	1.17654	0.866636	19.0561	19.0561	19.0704	19.4124	20.386	20.9846	21.3527	23.2738	23.9398	23.9534	23.9537	0.3197	0.319701	0.330594	0.367855	0.36808	0.36808	0.368101	0.401864	0.401866	0.401866	0.401866	18.5445	18.5447
15273	Hivep2	3.44313	3.79083	3.7594	4.30537	3.61336	3.7986	3.42896	3.90904	3.85133	3.71663	2.25001	3.13608	0.168556	0.222291	0.202485	0.199273	0.223036	0.227359	0.181339	0.266581	0.240887	0.226744	0.46636	0.168694	1.78612	1.78611	1.77638	1.76015	1.87742	2.07504	2.28953	2.32999	2.25347	2.25297	2.25295	0.141829	0.141833	0.152317	0.178994	0.180931	0.188733	0.190033	0.174093	0.171648	0.171627	0.171626	4.6832	4.68321
15278	Tfb2m	4.01626	3.6768	3.79766	4.20365	3.86803	3.8892	3.26936	4.10703	4.36845	3.42962	3.91375	4.359	0.214829	0.595063	0.746542	0.849383	0.751989	0.700198	0.356946	0.470641	1.0897	0.889727	1.0017	1.00577	10.39	10.3577	10.8981	12.029	14.5736	16.0009	16.7877	19.5215	23.74	23.7806	23.7795	0.470037	0.535023	0.873919	0.96728	0.973652	0.942111	0.909316	1.0429	1.05	1.03247	1.02527	12.3968	13.4707
15353	Hmg20b	3.49279	3.04781	3.42223	3.1008	2.99057	3.003	4.82335	3.87173	4.4365	3.00086	3.05758	2.96189	1.08947	0.909568	0.736377	0.713246	0.762435	1.01731	0.853938	0.538155	0.440745	0.355657	0.434673	0.52292	5.6818	5.66194	4.84126	4.51727	4.54117	4.52924	4.52232	4.51485	4.51562	4.57122	5.20038	0.355901	0.354888	0.333856	0.281593	0.255255	0.254995	0.254985	0.254984	0.255141	0.260154	0.309421	7.78929	7.74244
15354	Hmgb3	1.37669	1.18689	1.20224	0.990167	1.19373	0.960597	6.9224	4.98374	5.03745	5.44586	3.69443	4.58884	0.453476	0.64902	0.40888	0.624431	0.66023	0.36407	0.69516	0.885703	0.532427	0.440705	0.637005	0.32548	26.4694	26.4695	26.4806	26.6255	26.5439	26.3157	25.8322	21.9234	20.3192	20.6334	21.6268	0.937479	0.937364	0.924873	0.754133	0.63029	0.621493	0.601986	0.56095	0.540761	0.551304	0.579889	54.8917	54.8907
15356	Hmgcl	1.66323	1.12372	0.845116	1.08761	1.21577	1.08106	3.58378	3.0264	2.45912	2.90692	2.73077	2.24801	0.349206	0.175831	0.171858	0.150024	0.194306	0.175104	6.34904	5.06385	4.85008	4.62878	4.3974	4.64305	11.7819	11.7305	11.5546	11.3173	10.6193	10.0787	9.68132	8.92555	8.79904	9.32622	10.3953	0.114519	0.103261	0.0924861	0.0876462	0.0844124	0.0839944	0.0839056	0.0840603	0.0864406	0.0937318	0.105826	7.58984	6.76149
15361	Hmga1	4.36862	6.641	6.60438	8.73652	6.9644	8.33164	6.7715	14.8706	12.8704	17.1585	14.2063	15.288	2.09174	5.03621	5.87177	6.24316	4.30081	4.90025	2.95749	6.00919	7.21526	8.09842	6.91198	6.75783	126.467	126.08	126.293	127.314	131.498	134.905	137.626	155.044	194.329	199.993	200.521	1.78976	2.28706	2.72823	3.00708	3.21573	3.20054	3.15113	3.21635	2.89818	2.67009	2.58286	91.4267	92.9559
15364	Hmga2	7.37463	6.58946	7.00739	6.91888	7.30757	6.74406	16.4033	21.4696	23.0083	28.095	14.0955	10.9056	2.70673	5.31406	5.55435	6.41033	1.97819	1.88687	4.80005	8.4437	8.44601	5.54867	3.13478	4.60796	47.59	47.6778	48.0118	48.5586	50.5645	51.9102	52.2529	47.3779	31.4279	21.5734	16.7341	2.08863	2.12402	2.17611	2.226	2.31173	2.32034	2.28776	1.98247	1.29394	0.903924	0.713172	82.4115	84.0994
15366	Hmmr	6.9023	7.55396	7.03166	8.29558	6.72238	7.47344	3.38247	3.21355	3.0606	2.81485	4.49804	4.46582	0.766795	0.657256	0.469951	0.503493	0.621232	0.82911	1.61902	1.46056	1.08692	1.07527	1.41087	1.62668	38.1128	37.9246	37.1466	36.1458	33.803	32.509	31.8239	31.3066	35.3619	40.6317	42.2346	0.918963	0.858896	0.785591	0.760054	0.749383	0.748763	0.748957	0.758229	0.884621	0.993924	1.02173	48.6504	44.9144
15368	Hmox1	1.94412	2.22769	2.13051	2.19305	1.96709	2.60339	13.1275	13.0519	13.4505	15.3847	11.718	11.5761	2.25332	2.51153	2.80398	3.33109	2.1442	1.80427	2.42081	2.61143	3.01683	3.80588	2.39856	1.77223	67.3216	67.3216	67.3218	67.4199	78.4946	86.7422	90.5073	80.6808	79.1017	79.079	79.0787	1.311	1.311	1.31116	1.36933	1.91922	1.9182	1.74226	1.53995	1.53995	1.53995	1.53995	71.3385	71.3385
15370	Nr4a1	1.77406	1.35569	1.8144	1.47344	1.48686	1.41072	4.50337	5.62832	7.16418	8.6426	4.85485	4.78305	0.38839	0.706175	1.19699	0.911974	0.506662	0.390522	0.475056	0.721474	1.09741	1.04517	0.436322	0.536706	1.04576	1.08369	1.19223	1.30496	1.47724	1.46866	1.39424	1.16014	1.07806	1.06743	1.0646	0.142391	0.170873	0.195333	0.205721	0.206468	0.194865	0.182097	0.155273	0.146539	0.145286	0.144937	3.09144	3.90795
15374	Hn1	4.29455	4.46299	4.36427	4.71858	4.67999	5.04534	19.3759	20.3828	17.5601	20.602	21.3464	20.0534	1.22255	1.7425	1.56142	1.77236	1.47501	1.75231	1.50786	1.70795	1.73436	1.7071	1.82113	2.10271	136.475	136.257	136.195	137.662	141.715	144.778	147.093	153.775	190.386	194.647	195.1	1.33346	1.55329	1.96656	2.07147	2.07189	2.07189	2.07189	2.22565	2.32357	2.32357	2.32357	76.4399	76.4426
15395	Hoxa10	1.41448	0.769883	1.16124	1.17393	1.09453	1.24678	2.69965	1.92766	1.60262	1.65819	1.22893	2.20577	1.65523	1.19309	0.987783	1.11312	1.1116	1.09327	0.773703	0.636285	0.566983	0.364353	0.704713	0.557751	4.57384	4.58732	4.60467	4.54927	4.23094	4.02381	3.90352	3.76358	3.83446	4.07262	4.45857	0.678081	0.633581	0.524786	0.458013	0.451063	0.455036	0.455518	0.457242	0.471473	0.504955	0.555236	5.10651	4.73741
15399	Hoxa2	4.06688	3.4424	3.53462	3.93432	3.77485	4.5135	11.2222	5.2281	4.96311	5.35893	6.42708	7.32109	7.21722	4.22827	3.76215	3.6215	5.13745	4.54173	6.10373	4.64997	4.3071	4.65235	4.86459	4.19555	3.00905	3.0088	3.00733	3.00375	2.97291	2.90457	2.80573	2.46832	2.6521	3.17473	3.60706	0.577436	0.577099	0.576127	0.574397	0.563775	0.545564	0.52366	0.468244	0.51703	0.617922	0.6982	8.43252	8.42374
15404	Hoxa7	1.15034	1.66302	1.3955	1.63775	1.39022	1.59669	0.443996	0.410424	0.346448	0.347032	0.192046	0.636765	4.84799	3.77672	3.51024	3.9826	4.43129	4.20198	5.169	3.0035	3.41656	3.42206	3.71664	3.21538	5.6442	5.6442	5.6442	5.6442	5.6442	5.6442	5.64421	5.64479	5.68273	6.02967	6.97146	0.214753	0.214753	0.214753	0.214753	0.214753	0.214753	0.214755	0.214817	0.2176	0.237364	0.278176	4.47132	4.47132
15405	Hoxa9	1.8897	2.13476	2.31027	2.44835	2.35098	2.55371	1.37524	0.785644	0.92609	1.32132	0.62725	0.528826	4.19513	3.6087	3.15597	4.04694	3.95273	3.90818	2.06566	1.40144	1.00157	1.1878	2.09637	1.85024	2.58614	2.58614	2.58616	2.5867	2.64236	2.72269	2.76377	2.79588	3.33205	3.64743	3.65293	0.733701	0.733702	0.733783	0.735548	0.782474	0.792675	0.793334	0.793853	0.989189	1.03579	1.03637	4.26897	4.269
15452	Hprt	1.7166	1.69179	2.1561	1.95915	2.01434	2.1855	6.01852	7.1339	8.39589	8.32038	6.07484	7.08847	0.432017	0.525691	0.590866	0.741388	0.61476	0.710004	0.577176	0.583897	0.87019	0.992388	0.960707	1.10928	58.9263	58.9263	58.8592	58.827	58.8572	58.8783	58.8929	59.6979	80.055	81.3788	81.4513	0.368354	0.368379	0.437073	0.481065	0.481177	0.481177	0.481177	0.517623	0.513652	0.513652	0.513652	42.7856	42.7856
15461	Hras	2.09428	2.3374	2.37239	2.59387	2.53469	2.49526	3.24161	3.31253	2.92433	3.27736	2.78923	3.46454	1.1098	1.07622	1.42689	1.19228	1.20288	1.51879	1.1454	1.8656	1.88492	1.63991	1.89973	2.12353	27.3052	27.2358	27.1006	27.1516	28.2389	29.0659	29.6699	30.8408	33.4958	33.7549	33.684	0.7525	0.823907	0.972014	0.994854	0.99699	0.996996	0.996998	0.996996	1.10924	0.916692	0.720686	19.6695	19.6695
15463	Agfg1	1.02433	0.843843	1.05591	1.17635	0.918445	1.13008	1.49632	1.97147	2.03631	1.71621	1.23572	1.60227	0.467482	0.583934	0.56434	0.566768	0.473202	0.508005	0.667099	0.677265	0.57756	0.631014	0.644493	0.749211	24.6083	24.5294	24.4452	24.3765	24.4806	25.5404	25.5093	24.7675	22.5642	22.5083	22.5074	0.688317	0.688317	0.688317	0.688316	0.687492	0.647551	0.615762	0.586134	0.551795	0.551786	0.551786	29.1301	29.1301
15467	Eif2ak1	3.36368	4.44922	3.98415	4.61054	3.63197	4.11576	4.66186	5.64382	6.72616	6.85245	4.87599	4.93167	0.180437	0.213138	0.245907	0.209414	0.265423	0.221966	2.02306	2.50392	2.41679	2.57323	2.10679	2.73827	12.2975	12.2975	12.2926	12.2879	12.2919	12.2945	12.4311	14.4924	14.7863	14.7903	14.7903	0.0761949	0.0761953	0.0812023	0.0875487	0.0875561	0.0875729	0.0905157	0.0912214	0.0912214	0.0912214	0.0912214	13.2018	13.2018
15469	Prmt1	9.33382	8.91218	8.58388	9.37517	9.07336	8.49247	9.7378	8.29874	9.96892	9.62968	8.90526	8.93793	2.0166	2.58722	2.68617	2.88903	2.85051	2.94164	3.67	4.41988	4.43859	5.06075	5.20639	4.66564	94.8167	94.3495	94.2704	94.3516	94.5674	94.6854	94.7482	96.5992	114.351	108.222	108.153	2.03219	2.54681	2.74072	2.76798	2.77479	2.77481	2.77383	2.9526	3.04955	2.9439	2.94255	121.452	121.452
15473	Rida	12.5269	8.95181	8.78963	8.88503	8.51526	8.71463	7.85705	6.30958	5.43676	5.64876	6.94759	7.23742	0.135113	0.106519	0.0201503	0.0592916	0.0912298	0.152351	0.121538	0.0927654	0.0391796	0.0391796	0.0929302	0.119377	17.9671	17.8395	17.5433	17.2647	16.6324	16.2447	16.0069	15.6823	14.5698	13.5125	13.4829	0.215567	0.190936	0.159382	0.14901	0.148876	0.148876	0.148876	0.148841	0.132787	0.169446	0.208254	17.5761	15.4867
15488	Hsd17b4	0.611949	1.00068	1.06668	1.1668	1.29888	1.27268	1.6611	1.94463	2.51824	2.5689	2.14443	3.57142	0.144241	0.132117	0.094663	0.102698	0.179561	0.17553	0.231652	0.167415	0.204683	0.201108	0.393057	0.360091	18.7062	18.7061	18.7032	18.6789	18.8766	19.4949	19.922	20.6691	23.1258	23.3086	23.3179	0.156971	0.15703	0.160088	0.185921	0.237256	0.237628	0.237617	0.224549	0.208995	0.208892	0.20889	13.8804	13.8804
15490	Hsd17b7	2.82251	2.33643	1.83792	1.37682	2.06051	1.66205	6.16853	7.27915	6.02536	6.01156	6.52794	4.30887	0.388035	0.352766	0.339317	0.297697	0.242545	0.238026	0.327682	0.478912	0.392789	0.473018	0.396759	0.376845	8.00151	7.96638	7.84226	7.68344	7.26753	6.98971	6.78863	5.98695	4.49685	4.07149	3.96538	0.57639	0.541344	0.507311	0.49222	0.480394	0.474428	0.465802	0.401308	0.310928	0.290297	0.284764	9.06362	8.24461
15505	Hsph1	6.82249	5.55988	5.54371	5.38167	5.45137	5.04752	9.26517	7.75592	8.98043	7.79187	8.94155	10.2445	1.43873	1.401	1.11761	1.24875	1.39959	1.6277	1.36664	1.20897	1.30275	1.19128	1.3748	1.36863	38.0772	37.9835	37.3601	36.7121	35.6021	35.164	34.9914	34.8887	38.9983	50.1986	51.1494	2.32303	2.24838	2.13815	2.12862	2.12792	2.12792	2.12792	2.12889	2.49736	3.08786	3.1218	70.9223	67.5221
15510	Hspd1	11.8381	12.3521	12.2915	13.6893	12.1131	12.8579	12.9325	12.3408	12.5194	14.1465	15.2169	15.757	3.20856	4.43179	4.53329	4.5724	5.22347	5.1506	4.53967	5.27855	5.44726	6.1556	6.15122	7.05658	453.696	453.717	453.799	453.953	454.938	456.801	459.6	479.525	542.007	604.893	654.935	5.15044	5.15591	5.16585	5.18091	5.26538	5.41669	5.62086	6.34587	6.37375	5.95676	5.78943	412.323	412.68
15519	Hsp90aa1	4.85011	4.81775	4.83233	4.40383	4.3686	4.61236	18.9537	21.447	16.9924	20.2633	19.4961	22.4556	1.9889	2.38372	2.41865	2.62931	2.70375	2.64252	3.53954	5.37457	4.83812	5.24248	4.95877	5.31832	578.368	577.908	577.84	577.953	578.467	579.45	581.14	598.377	690.729	818.292	927.826	2.10338	2.57793	2.74428	2.74543	2.75178	2.7633	2.78071	2.91605	2.74617	2.62571	2.932	475.944	476.012
15525	Hspa4	6.02755	6.98648	6.6161	7.43054	7.12465	7.11619	15.357	15.5905	16.7411	19.2026	16.2089	14.9817	1.7744	2.05546	2.37794	2.58692	2.36954	2.53337	2.43977	3.1362	3.59559	3.70107	4.27392	4.06755	101.929	101.85	101.656	101.649	102.575	103.609	104.248	106.219	130.39	130.926	130.936	1.98503	2.06777	2.29169	2.34516	2.43111	2.43116	2.43071	2.59149	2.59042	2.58057	2.58014	97.9508	97.9508
15526	Hspa9	15.3712	12.5788	12.165	13.4726	11.6208	13.1913	10.1515	11.3339	12.1608	12.7376	13.0206	9.97518	2.43143	3.01536	3.05504	2.88603	2.93847	3.06433	5.57041	6.16816	6.32694	6.12175	6.2591	6.11836	278.817	278.817	278.817	278.817	278.817	278.817	278.817	279.25	296.885	297.686	325.937	2.88436	2.88436	2.88436	2.88436	2.88436	2.88436	2.88436	2.98339	3.07994	3.07994	3.51469	217.302	217.302
15528	Hspe1	11.6811	12.2297	12.2119	13.5356	11.9956	12.686	11.8567	13.9493	13.808	13.5241	14.5514	12.4334	1.91322	3.76936	3.2068	3.53108	4.31274	4.28051	2.5296	3.67038	3.48258	3.51934	4.06325	3.89736	330.285	330.081	329.752	329.832	330.012	330.121	330.186	330.272	372.218	380.831	401.453	2.93933	3.14883	3.55793	3.56142	3.56147	3.56147	3.56147	3.56143	3.56043	3.32599	3.63888	334.625	334.625
15529	Sdc2	2.35439	2.16287	1.91983	2.27289	1.92358	1.98011	18.9946	15.6766	14.1301	16.0226	17.0243	16.5019	1.35063	1.42364	1.33128	1.23988	1.24768	1.1383	2.93846	3.79403	3.01362	3.0226	2.51873	2.64186	84.3712	84.3712	84.3712	84.3712	84.3712	83.3364	80.8233	76.2862	73.7654	56.8492	55.736	1.40307	1.40307	1.40307	1.40307	1.40307	1.24408	1.24367	1.24367	1.0716	0.925655	0.925655	58.7339	58.7339
15558	Htr2a	0.731795	0.699235	0.790339	0.582302	0.985424	0.860323	0.355089	0.570187	0.627904	1.16333	0.175562	0.913236	0.0551155	0.0873701	0.043719	0.0678569	0.0263018	0.0474446	0.0391796	0.0391796	0.0391796	0.0954091	0.0391796	0.0391796	2.01738	2.01609	2.00773	1.98489	1.83595	1.69377	1.60988	1.49574	1.15055	0.854991	0.755512	0.0588114	0.0583993	0.0570207	0.0545573	0.0477033	0.0455091	0.0448281	0.0428157	0.0317326	0.0241847	0.0217987	3.38717	3.35854
15574	Hus1	3.1783	3.67633	4.09726	4.64997	3.99774	3.66706	8.23969	6.83232	8.0653	11.0259	7.66537	9.42927	0.394326	0.366676	0.351528	0.39142	0.517379	0.507568	0.383473	0.308173	0.470677	0.384543	0.689001	0.654382	5.53193	5.51957	5.50756	5.51854	5.67445	5.91569	6.16084	6.83313	7.30556	7.46962	7.55208	0.235772	0.231488	0.234417	0.239798	0.256061	0.268557	0.277848	0.29844	0.313363	0.319253	0.322376	7.22185	7.09078
15587	Hyal2	3.70096	3.31228	2.89601	3.63976	2.93402	3.10353	5.99888	5.60547	4.91468	5.48265	4.40882	3.31314	1.18091	1.2978	1.13201	0.667619	1.03496	1.0292	0.914312	0.769828	0.658502	0.5659	0.517102	0.75195	19.2182	19.218	19.1082	16.6807	16.4512	16.641	16.1898	13.7664	12.4556	12.3145	12.2994	0.838712	0.838712	0.838712	0.838712	0.838415	0.666912	0.652709	0.545361	0.545361	0.545361	0.545361	10.5422	10.5422
15893	Ica1	2.43419	3.97344	3.97473	5.68199	4.62806	5.72427	3.62818	3.92682	6.99331	5.03187	8.00503	6.61988	0.116472	0.128975	0.171813	0.221862	0.428668	0.391303	0.311274	0.146011	0.0825297	0.174565	0.521351	0.766193	5.09783	5.13003	5.24324	5.4312	6.32165	7.6117	9.02942	13.9019	18.3843	20.2547	21.3338	0.115235	0.125149	0.138444	0.156111	0.272342	0.345593	0.395499	0.411039	0.423562	0.45811	0.479622	5.47399	6.01697
15898	Icam5	6.87259	8.01731	7.58286	9.16455	7.98939	7.72129	0.960791	2.94294	4.07377	4.46665	5.20365	6.47687	0.580086	1.2396	1.51855	1.5188	1.97323	2.26886	0.162468	0.0649499	0.224095	0.185403	0.447965	0.399562	0.329213	0.330693	0.339753	0.312769	0.32067	0.429063	0.496614	0.743386	0.92491	0.905878	0.900052	0.130898	0.136348	0.153104	0.180243	0.289571	0.371834	0.404818	0.383872	0.354049	0.347947	0.345979	0.704125	0.799876
15902	Id2	4.44709	5.58358	5.87836	6.38778	5.62388	6.08837	11.4378	9.73323	9.98044	12.3446	11.7398	12.2875	1.86738	0.958803	1.88695	1.89153	2.20686	2.90647	1.41025	0.946686	0.934017	1.38454	1.13254	1.31855	30.9598	30.967	31.1232	31.6759	33.5372	34.6298	35.2333	35.9074	36.16	39.5625	46.2143	1.96106	1.97127	2.0841	2.22507	2.27802	2.27871	2.27875	2.27886	2.30041	2.59706	2.98566	36.8689	37.2816
15903	Id3	4.29375	4.05607	3.89471	4.17117	4.0215	4.16511	33.8194	22.6592	19.4937	28.0964	27.8006	26.9998	22.8609	15.4405	11.2144	12.8545	17.9247	19.3029	11.8168	6.30553	6.69636	7.84073	9.85524	8.99636	104.937	104.753	104.016	102.871	98.7775	95.2227	92.6293	89.3366	95.9228	105.906	114.942	5.61637	5.41767	5.16337	4.98195	4.73937	4.67421	4.66519	4.79638	5.29773	5.83687	6.29116	81.8337	77.2878
15926	Idh1	0.998019	1.80794	1.93352	2.32373	2.08492	2.03072	1.7426	2.94459	4.18126	4.06996	3.62228	4.90103	0.450665	0.367642	0.288019	0.305587	0.354544	0.39469	0.531836	0.421213	0.167575	0.238994	0.335003	0.270245	13.77	13.77	13.7003	13.349	12.659	12.1683	11.8437	11.2111	11.0066	10.9912	10.99	0.166987	0.166981	0.132904	0.123096	0.134365	0.174052	0.174053	0.190431	0.192027	0.192027	0.192027	8.87495	8.87414
15931	Ids	0.715954	0.60797	0.528387	0.312737	0.637774	0.48027	3.04234	1.90287	1.84659	1.93451	2.11403	2.30096	0.248769	0.153695	0.0841345	0.0518815	0.138233	0.124425	0.344463	0.227299	0.0722889	0.136519	0.213648	0.0621626	8.34407	8.33868	8.22921	8.03915	7.58943	7.26636	7.01768	6.64789	6.58147	6.57987	6.57983	0.127082	0.124445	0.107484	0.104341	0.103776	0.101074	0.100287	0.100213	0.100213	0.100213	0.100213	7.77981	7.55327
15937	Ier3	3.79268	2.76559	3.27805	2.59592	3.39822	2.61295	28.2287	31.9862	26.1478	36.8241	27.1352	22.1234	7.2988	18.1021	16.6319	16.9551	10.1163	3.86863	3.33808	3.93778	4.60538	5.01872	2.41395	1.89585	58.8406	58.8408	58.8451	58.8774	59.9267	58.667	53.3281	44.2864	43.4747	43.4702	43.4701	3.81433	3.81458	3.81777	3.83589	4.03076	3.38004	2.95352	2.81975	2.81796	2.81794	2.81794	79.4227	79.4328
15944	Irgm1	2.17672	1.83566	1.49634	1.6353	1.62866	1.72079	3.61681	3.41045	4.09591	4.13516	4.07076	3.75942	1.06398	1.10491	0.929842	0.54892	0.934487	0.555734	0.874821	1.29785	0.920968	0.635197	0.925338	0.507675	10.8951	10.8828	10.6655	10.1523	8.90072	8.2951	8.00619	6.70934	3.62184	3.56159	3.56038	0.855593	0.83827	0.708119	0.627169	0.609467	0.609161	0.607892	0.447674	0.280893	0.279639	0.279595	16.4654	15.7627
15951	Ifi204	0.528836	0.707144	0.592877	0.483657	0.633969	0.62689	0.861777	1.34046	1.6508	1.74837	0.779676	1.06696	0.0232942	0.0236918	0.0223817	0.0457224	0.0124888	0.00650354	0.0720129	0.312522	0.264838	0.278001	0.0980538	0.082897	2.98293	2.98292	2.9829	2.98271	2.96047	2.79649	2.62681	2.09358	1.46789	1.45349	1.45324	0.023702	0.0237019	0.0236998	0.0236798	0.0181818	0.0134893	0.0131196	0.0129493	0.0111227	0.0111116	0.0111112	3.45107	3.45106
15975	Ifnar1	1.70125	1.51938	1.21183	1.5628	1.3912	1.53847	4.87953	5.04204	5.43499	4.53775	3.96916	2.81912	0.345201	0.274876	0.331152	0.241994	0.357796	0.263041	0.421555	0.384628	0.355352	0.352077	0.371562	0.390702	9.21093	9.18975	8.94481	8.74048	8.73004	8.5698	8.46614	7.66024	7.16106	7.16065	7.16065	0.227021	0.217711	0.202936	0.202826	0.19765	0.189202	0.18912	0.189119	0.189119	0.189119	0.189119	19.3705	18.3386
15976	Ifnar2	2.20317	3.38399	3.47346	4.00976	3.62109	3.72897	10.7691	9.24556	10.2902	12.5999	10.2313	12.7043	0.269798	0.355393	0.451735	0.533387	0.626233	0.567386	1.45745	1.69141	1.65067	1.61295	1.69236	1.43013	6.981	6.98509	7.0573	7.35207	8.67519	9.61084	10.2188	11.5956	12.1306	12.1477	12.1482	0.209775	0.212992	0.244141	0.300077	0.335578	0.337025	0.339392	0.362508	0.365022	0.365046	0.365047	6.47004	6.6315
15980	Ifngr2	1.38065	0.868093	1.19048	1.2848	1.09158	1.14629	3.40412	4.4781	5.33021	5.18104	3.20575	4.63141	0.687973	0.776173	0.769335	0.736093	0.594744	0.751095	0.759713	0.632552	0.736249	0.587815	0.76676	0.806791	20.2364	20.1306	19.9452	19.7732	19.3659	19.0854	18.8917	18.4934	16.0506	13.1823	12.4899	0.410303	0.378928	0.374967	0.374566	0.374466	0.37444	0.374354	0.370219	0.298114	0.257593	0.251488	15.1667	13.9398
16001	Igf1r	4.76785	6.13959	6.86077	7.77568	6.76141	6.92439	5.92314	6.11515	3.43034	5.15127	3.92223	4.97832	0.680848	0.746986	0.808858	0.780248	0.680729	0.639906	0.774817	0.949358	0.9356	0.983255	0.919169	0.948807	9.47474	9.47336	9.31549	9.4081	10.0654	10.2982	10.3868	10.4348	8.75442	7.63595	7.59913	0.51239	0.51237	0.511679	0.506077	0.495311	0.495152	0.495146	0.494546	0.395822	0.361302	0.360321	20.7866	20.7853
16007	Cyr61	6.01533	5.15563	5.1925	5.06751	5.54656	5.87009	46.8127	37.045	34.6478	44.7521	35.4965	35.3011	25.8267	23.6844	29.0038	31.2076	21.6221	18.0757	13.3833	11.5016	13.8891	15.0628	10.2573	9.21085	211.273	211.227	210.553	207.644	191.741	182.942	179.41	176.233	131.057	79.7283	71.2109	19.3733	19.3213	18.8807	17.8041	16.3511	16.2616	16.2501	16.0791	11.0539	7.07761	6.49671	409.987	407.96
16151	Ikbkg	0.703304	0.956957	1.05933	0.933985	0.937482	1.04728	2.8702	3.04604	3.36283	3.16493	3.27154	2.90046	0.817641	0.785593	0.755449	0.719632	0.893166	0.957302	0.819928	0.561288	0.487945	0.499343	0.668064	0.411183	8.38543	8.37184	8.28645	8.10189	7.42474	6.90993	6.59401	6.25263	6.46536	6.94594	7.29634	0.350624	0.343343	0.333267	0.336709	0.319697	0.314551	0.320629	0.334414	0.351536	0.377704	0.394195	10.2713	9.94848
16155	Il10rb	0.982798	1.08634	0.962183	1.11913	1.13582	0.901543	4.5513	5.54598	5.55817	5.60061	4.60041	4.1094	0.178385	0.323508	0.345438	0.285959	0.31547	0.281637	0.310799	0.324429	0.308479	0.179092	0.365596	0.301587	2.43983	2.43983	2.43979	2.43399	2.36191	2.31745	2.29163	2.25991	1.58087	1.35718	1.3541	0.0632213	0.0632213	0.0631883	0.0604349	0.0584545	0.0584543	0.0584543	0.0584525	0.0354968	0.0350867	0.0350866	2.65181	2.6518
16156	Il11	0.638074	0.397894	0.405175	0.550586	0.379248	0.526579	1.44251	2.02578	1.62451	1.66826	1.19433	1.34773	0.572789	0.644513	0.570584	0.434742	0.671588	0.763923	0.140742	0.194036	0.163323	0.160139	0.060236	0.309757	1.04217	1.04217	1.04217	1.04217	1.03963	0.948252	0.904623	0.869666	0.616706	0.616677	0.616677	0.0998503	0.0998504	0.0998504	0.0998503	0.0981667	0.0853896	0.0852872	0.0802017	0.0590842	0.0590841	0.0590841	2.91073	2.91073
16157	Il11ra1	1.15771	1.20858	0.838504	1.13574	1.09463	0.955085	4.97478	2.9053	3.65751	2.33208	3.04892	2.38678	0.235606	0.119327	0.138112	0.0178041	0.146436	0.154483	0.134648	0.114189	0.0861719	0.0790087	0.199876	0.0391796	3.0287	3.02375	2.96649	2.96773	2.99862	2.86253	2.67882	2.36402	2.27795	2.27365	2.27344	0.135624	0.127522	0.100651	0.0962068	0.0958275	0.0958271	0.0958271	0.095827	0.0958272	0.0958271	0.0958271	2.41067	2.09155
16164	Il13ra1	0.644721	1.1123	1.20101	1.5434	1.46055	1.64369	1.69783	2.92267	3.62406	2.85146	3.50535	4.31009	0.0654577	0.118438	0.169764	0.245524	0.233465	0.232303	0.0980083	0.0477206	0.130393	0.179945	0.238964	0.27278	13.4816	13.5066	13.5537	13.6734	14.3759	15.3498	16.4456	20.649	25.592	28.1233	29.8859	0.0889063	0.0936653	0.137181	0.168035	0.191724	0.210355	0.224911	0.213905	0.204743	0.218827	0.230381	6.59204	6.96424
16169	Il15ra	2.92701	3.63939	4.27617	4.99972	4.38859	5.29962	0.848322	1.3229	2.07373	2.32344	2.46677	2.98529	0.0702645	0.186583	0.24349	0.267295	0.512619	0.608895	0.369596	0.384726	0.288207	0.349246	0.814154	0.774535	0.635742	0.643519	0.682893	0.752967	1.17134	1.83217	2.51991	4.06144	4.56974	4.63885	4.65882	0.0648479	0.0807259	0.109217	0.142577	0.235259	0.294755	0.328953	0.375061	0.389363	0.392085	0.393023	1.60824	2.14758
16173	Il18	0.687631	0.637812	0.537273	0.459227	0.378799	0.167445	3.72867	1.66292	2.04507	1.64136	1.41773	1.16036	0.0883987	0.0417473	0.0479981	0.0638151	0.0333742	0.0662748	0.178294	0.195535	0.106697	0.164355	0.152998	0.155533	1.67782	1.67229	1.61138	1.54295	1.40451	1.33077	1.29144	1.09009	0.714141	0.710236	0.710208	0.0538673	0.0496134	0.0404571	0.0400439	0.0400298	0.0400291	0.0400154	0.0281978	0.0228039	0.0228017	0.0228016	2.11501	1.85704
16177	Il1r1	1.60682	1.23432	1.12366	0.844889	1.22368	1.11437	1.69932	1.20137	1.4828	1.76763	0.494364	0.63222	0.238333	0.296773	0.27634	0.291487	0.142891	0.15127	0.399284	0.540311	0.381943	0.471191	0.16901	0.0908579	4.45952	4.46081	4.46766	4.48282	4.53845	4.42102	4.06873	2.66778	2.15035	2.10585	2.09649	0.179005	0.179645	0.18119	0.183272	0.182551	0.16306	0.138936	0.0957828	0.0855762	0.0844078	0.0841176	6.23608	6.26509
16180	Il1rap	2.91082	2.36104	2.61779	2.79567	2.4654	2.68064	4.52846	5.97692	5.46824	5.93111	5.14716	3.7402	0.0708296	0.0726704	0.0624071	0.0660186	0.0620072	0.0872876	0.0541848	0.0748203	0.0391796	0.0391796	0.0391796	0.0391796	3.89122	3.89129	3.89748	3.94012	4.09344	4.19606	4.26341	4.36802	3.99413	3.25153	3.19735	0.125924	0.12601	0.130882	0.140511	0.142131	0.142133	0.142133	0.142109	0.11655	0.103556	0.103395	3.27615	3.28113
16190	Il4ra	2.42252	1.57755	1.98386	1.84846	1.62627	1.47757	4.45073	4.76708	5.53012	5.59174	3.21556	3.5395	0.458478	0.627582	0.610167	0.555759	0.388527	0.32424	2.04247	3.45506	3.59779	3.29717	2.19623	1.95048	12.9401	12.9401	12.94	12.94	12.9364	12.9064	12.7931	11.8766	10.3685	8.4335	7.88461	0.578735	0.578734	0.578725	0.578686	0.57765	0.571534	0.556051	0.515265	0.436306	0.364282	0.350122	12.3466	12.3466
16194	Il6ra	2.96505	3.35028	3.6551	3.41129	3.36482	3.58149	2.30649	4.88247	5.73526	5.03237	5.07569	3.99574	0.204152	0.214249	0.221478	0.246133	0.135997	0.176449	0.286213	0.243227	0.315254	0.411445	0.482082	0.317076	0.852314	0.852357	0.866481	1.01966	1.40403	1.52673	1.56514	1.32782	1.08207	1.08201	1.08201	0.0694494	0.0695134	0.0834101	0.124656	0.128963	0.128963	0.128955	0.0955802	0.0881665	0.0881661	0.0881661	1.97863	1.98308
16195	Il6st	2.93584	3.03495	2.76024	3.28854	2.808	2.94589	10.5366	12.6255	12.0743	12.2089	10.328	11.8125	1.51192	1.5326	1.41413	1.40858	1.67162	1.4842	2.39126	2.29161	2.37336	2.72465	2.94105	2.71945	73.1835	73.0939	72.7611	72.4693	71.8233	71.4187	71.1651	69.9279	59.4004	59.0782	59.0705	1.41304	1.37236	1.36587	1.36586	1.36586	1.36586	1.36586	1.27789	1.14054	1.14054	1.14054	68.4703	66.2578
16202	Ilk	3.58157	4.64722	4.18093	4.63751	4.17128	4.83484	6.87581	6.51771	7.68944	6.76339	5.09228	4.58253	4.862	5.61479	5.68678	5.42524	4.81058	4.37928	4.84012	5.1839	4.94435	5.22383	4.38255	3.69532	40.4996	40.4994	40.4994	40.4994	40.4978	39.1885	36.1893	32.7549	30.5195	21.8504	21.7104	2.36993	2.37024	2.37026	2.37026	2.36861	1.95809	1.8974	1.89721	1.91536	1.72068	1.7213	48.8332	48.8332
16206	Lrig1	3.56822	3.08698	2.94571	2.98585	2.75647	2.73692	5.47153	6.81791	6.26302	6.19947	4.72765	5.41443	0.570784	0.719331	0.657169	0.623833	0.468351	0.384248	1.07435	0.98053	1.07973	1.06121	0.873926	0.804561	20.1847	20.1847	20.1847	20.1847	20.1846	20.1835	20.1736	18.5127	12.2936	9.43017	9.14622	0.562113	0.562113	0.562113	0.562113	0.562101	0.5619	0.560373	0.454588	0.296892	0.256268	0.254228	17.5507	17.5507
16322	Inha	3.15181	3.37241	3.76838	4.17441	3.38231	3.52342	0.514511	0.99564	0.735692	1.00285	0.388567	0.485554	0.984859	0.789173	0.888406	0.655914	1.14508	1.36509	0.461973	0.40375	0.421794	0.299443	0.719656	0.486227	0.283835	0.283835	0.283834	0.283802	0.26429	0.251792	0.272337	0.286343	0.283918	0.283835	0.283835	0.623094	0.623094	0.623096	0.623142	0.659423	0.800981	0.858768	0.874318	0.769879	0.769598	0.769596	2.14915	2.14915
16323	Inhba	1.08993	0.965214	0.874314	0.774532	0.675108	0.758837	1.55183	1.52992	1.49077	1.18108	1.96175	1.13465	1.33425	1.22714	1.08866	0.876401	0.955232	0.895	1.59827	1.04428	1.00481	1.12483	0.940989	1.24539	23.186	22.9871	22.1625	20.9613	18.2466	17.2229	16.8454	15.5521	11.2979	9.93333	9.61974	1.08106	1.02113	0.920933	0.851961	0.793716	0.783508	0.776604	0.707905	0.515368	0.460688	0.447863	63.3697	59.2863
16332	Inppl1	1.99947	2.29808	2.31824	2.77951	2.45393	2.35623	4.00948	1.89498	2.62856	4.42582	2.58874	2.5091	0.929464	0.900723	0.928495	0.840355	0.945347	1.03066	0.758019	0.720186	0.575677	0.58797	1.00071	0.91674	18.4176	18.3408	18.099	17.7673	16.514	16.7701	16.809	16.5621	16.7444	17.2721	17.8278	0.850309	0.80559	0.76409	0.735369	0.688165	0.666648	0.655542	0.645039	0.659701	0.68137	0.702961	21.2246	19.8113
16351	Ipp	2.21101	2.37763	2.01619	2.44277	2.06495	2.12516	9.37684	9.33322	9.66355	10.1271	8.66002	10.1318	0.187738	0.159405	0.121151	0.113171	0.151558	0.152711	0.144421	0.123255	0.0391796	0.0391796	0.0391796	0.163048	3.94263	3.90361	3.81699	3.72427	3.5072	3.39059	3.34081	3.41348	3.90388	4.49042	5.02981	0.109751	0.10034	0.0956296	0.0934618	0.0914921	0.0914442	0.0919966	0.0966707	0.111387	0.127731	0.142357	5.79524	5.25627
16362	Irf1	2.20346	1.89548	1.46661	1.91837	1.73252	2.08803	14.1442	12.1232	8.77286	10.0084	11.9512	10.4563	1.39093	1.01354	1.23506	0.977924	1.23634	0.941406	2.11192	1.40643	1.59066	1.28961	1.95373	1.34228	9.18095	9.16675	8.29531	7.03912	6.79709	6.8063	6.77685	5.95683	4.49764	4.39615	4.38687	0.730238	0.723662	0.711897	0.756366	0.714479	0.70602	0.696154	0.486474	0.396612	0.392043	0.391507	12.0626	11.8515
16363	Irf2	3.07024	2.58548	2.98209	3.16119	2.7853	3.22359	4.12344	3.08681	3.52625	3.17586	2.65317	2.68854	0.489753	0.47916	0.435196	0.38233	0.390361	0.411445	0.954851	0.543397	0.631738	0.521743	0.611367	0.680533	1.56966	1.55922	1.4871	1.36546	1.19413	1.17504	1.17308	1.17275	1.17491	1.19136	1.24958	0.293666	0.285836	0.257777	0.234019	0.220349	0.219543	0.219433	0.219411	0.219859	0.223137	0.23446	9.55656	9.19135
16367	Irs1	2.27246	2.34793	2.47969	2.83779	2.57204	2.49665	8.88735	8.10318	8.14657	8.02405	9.22621	8.50508	0.906226	0.779563	0.756926	0.83548	0.997342	0.861962	0.70351	0.574466	0.799876	0.758659	0.962871	1.03688	10.1845	10.1845	10.1845	10.1845	10.1785	10.0808	9.99803	9.94707	8.39494	6.3559	6.32026	0.602605	0.602605	0.602605	0.602602	0.600474	0.58952	0.588577	0.588455	0.459023	0.374923	0.373943	20.5354	20.5354
16371	Irx1	1.44512	0.85075	1.40704	1.21707	1.36707	1.3884	1.39877	1.08527	1.12827	1.39367	1.06274	1.19008	0.972921	0.706159	0.687437	0.884783	0.815762	1.26017	0.638859	0.55708	0.598098	0.356354	0.64447	0.62204	3.58537	3.58534	3.58397	3.57201	3.49711	3.45518	3.43643	3.42175	3.24474	2.62605	2.55628	0.556219	0.556135	0.553549	0.542437	0.530999	0.530793	0.530788	0.53068	0.487722	0.402207	0.39629	5.82449	5.82144
16372	Irx2	2.38879	2.14282	2.55051	2.77292	2.58761	2.53616	1.90395	2.36254	1.44388	1.96011	2.28603	2.64257	0.910016	0.883869	0.903137	1.02896	1.2019	1.10937	0.861678	0.858676	0.839316	0.864082	1.20783	1.30589	5.67175	5.66436	5.4074	5.31882	5.45853	5.61987	5.95785	6.99759	6.81876	5.95192	5.66811	2.11157	2.11919	2.4223	2.62277	2.8031	2.87044	2.8579	2.80096	2.65554	2.3246	2.23445	11.7791	11.7792
16373	Irx3	2.20039	2.3502	3.1018	3.29787	2.98754	3.22305	1.83408	5.11569	5.56981	6.72265	4.57646	6.01851	0.594643	1.70132	2.03547	2.38977	1.5656	1.66929	0.419229	0.900816	1.44291	1.26501	0.807276	0.569409	2.83502	2.84365	2.91839	3.10335	3.8178	4.26817	4.49923	4.68272	4.07426	3.33042	3.10779	0.359328	0.375597	0.440043	0.515987	0.591458	0.598072	0.598799	0.591539	0.494428	0.412806	0.391649	4.02211	4.43847
16391	Irf9	1.59016	1.31912	1.21531	1.35711	1.18656	1.18516	2.75252	2.41969	2.45374	2.54685	2.80475	2.90634	0.60854	0.617088	0.444597	0.360053	0.517263	0.458501	0.428373	0.506335	0.288892	0.275175	0.386442	0.427961	1.1669	1.1669	1.1669	1.16682	1.10755	0.95809	0.950387	1.01433	1.01466	1.01466	1.01466	0.279625	0.279625	0.279621	0.279485	0.236738	0.217459	0.234583	0.243141	0.243143	0.243143	0.243143	3.5082	3.5082
16396	Itch	1.10735	0.82832	0.746766	0.974356	0.665589	0.741533	6.80798	5.45443	6.11193	5.36191	4.98368	4.7661	0.6232	0.479421	0.419584	0.383801	0.463558	0.473241	0.775241	0.640887	0.684259	0.777615	0.794354	0.660768	13.0229	13.0156	12.9335	12.6701	11.594	10.9709	10.6719	10.4207	10.4155	10.4905	10.8066	0.443715	0.440148	0.418741	0.385162	0.35652	0.35487	0.354676	0.354629	0.354997	0.358318	0.370971	19.9053	19.6879
16402	Itga5	4.16352	3.54949	4.00577	3.86797	4.06495	4.15094	15.366	14.3241	14.1213	13.1146	10.916	11.8126	2.29307	2.83648	2.9144	2.86836	2.07222	1.90618	4.05904	5.1506	5.30951	4.95589	3.68765	3.28198	49.0142	49.0142	49.0142	49.014	48.9713	48.2087	46.0735	42.617	34.6372	24.9709	24.2586	2.20736	2.20736	2.20735	2.20724	2.19579	2.07576	1.94748	1.90812	1.42625	1.10856	1.09151	75.557	75.5569
16410	Itgav	2.49207	2.69228	2.68411	2.28656	2.68341	2.48474	12.4583	10.3505	9.35162	11.1574	7.95603	7.82516	0.692175	0.82878	0.926575	1.0211	0.573126	0.519295	1.26467	2.03904	1.83839	1.72688	1.09552	1.17545	29.2657	29.2639	29.0885	28.9489	30.7929	30.3389	29.7584	28.8377	26.1798	21.5566	21.3454	0.574542	0.574542	0.574542	0.574541	0.538938	0.468577	0.468327	0.468325	0.374769	0.349184	0.34917	28.959	28.959
16412	Itgb1	5.14587	5.53919	5.32621	5.66677	5.67748	5.36039	13.7379	13.6927	14.608	15.5113	9.59131	9.76541	1.59339	1.98034	2.22336	2.54686	1.3986	1.39572	1.67037	2.13534	2.50519	2.737	1.58711	1.53345	268.286	268.257	268.26	268.265	268.57	264.013	259.101	250.834	241.713	211.94	210.492	2.48407	2.51614	2.51613	2.51444	2.15318	1.99004	1.99003	1.99003	1.73517	1.68478	1.68478	205.011	205.011
16416	Itgb3	1.18421	0.935169	0.662843	1.16297	0.845807	0.970719	1.56312	1.24404	1.52081	0.966563	1.04369	1.32023	0.176002	0.214434	0.208974	0.169674	0.103233	0.0739484	0.132622	0.199778	0.0964778	0.0391796	0.0391796	0.0481156	2.48288	2.4594	2.4203	2.38453	2.30725	2.25637	2.21089	1.93111	1.32632	1.11681	1.05343	0.0547984	0.0507128	0.0498045	0.0495088	0.049041	0.0483687	0.0473024	0.0397912	0.0278181	0.0242348	0.023108	3.48371	3.21356
16421	Itgb7	8.87645	7.59806	7.28188	7.87393	6.8205	9.22957	2.17631	2.19145	1.94095	1.2952	2.48933	1.65523	0.820502	0.909507	0.879557	0.812178	0.850241	1.04534	1.66223	1.74372	1.75007	1.73645	2.01607	1.60208	5.64451	5.64451	5.64451	5.64452	5.64484	5.64698	5.65539	5.89334	6.40116	6.7449	7.70386	0.135541	0.135541	0.135542	0.135545	0.135589	0.135819	0.136533	0.14671	0.155291	0.165696	0.193808	5.20494	5.20495
16423	Cd47	2.43133	2.75635	2.77149	3.54217	2.69104	3.15644	5.0961	4.0453	2.94851	3.20771	2.80195	3.98148	0.394332	0.351968	0.263116	0.296349	0.416715	0.37532	0.695155	0.48569	0.422133	0.352418	0.399215	0.46885	7.46546	7.433	7.22085	7.02596	6.67858	6.52637	6.45969	6.3888	6.12724	6.12491	6.1249	0.329814	0.306437	0.283626	0.283097	0.283084	0.283084	0.283083	0.280593	0.2706	0.27059	0.27059	12.3226	11.0893
16432	Itm2b	0.660193	0.528897	0.682994	0.598296	0.74356	0.539703	5.29886	3.55751	4.10703	3.71438	2.90064	3.67214	0.569345	0.492904	0.444147	0.352266	0.379229	0.326368	0.446128	0.438945	0.381559	0.310832	0.526994	0.170294	51.3006	51.1943	50.855	50.373	48.781	47.3982	46.2971	42.581	34.3166	28.7662	26.3686	0.29943	0.28596	0.272969	0.265116	0.256587	0.253152	0.20533	0.180633	0.183086	0.19289	0.182009	32.3076	30.7634
16438	Itpr1	4.23627	4.29143	3.93446	4.52245	3.57638	4.01893	9.26373	9.27333	8.77544	9.54881	10.2748	10.4683	0.138404	0.158711	0.146543	0.157555	0.188672	0.168814	0.0606582	0.112438	0.106724	0.0391796	0.148364	0.0435896	4.73514	4.73615	4.7412	4.75322	4.83106	4.93662	5.22235	6.29454	7.99977	8.9185	8.98377	0.111329	0.111598	0.112247	0.113367	0.120895	0.169148	0.171386	0.162512	0.173156	0.174972	0.17548	6.94441	6.96387
16439	Itpr2	1.93655	1.93052	2.25667	2.53384	2.19038	2.45199	4.55102	5.03365	4.79251	4.57512	3.57452	2.90573	0.170934	0.194227	0.190083	0.159494	0.159809	0.144742	0.599105	0.620859	0.620559	0.694304	0.633922	0.449298	5.27058	5.27058	5.27058	5.27056	4.98499	4.76876	4.71048	4.69067	4.69041	4.30183	4.17106	0.174395	0.174395	0.174395	0.17439	0.155229	0.16327	0.169498	0.169566	0.16979	0.171351	0.169999	13.1786	13.1786
16440	Itpr3	5.97801	6.00657	6.12894	6.36943	6.15619	6.39354	6.68365	6.83574	8.85244	9.75174	6.48301	5.36008	0.584679	0.733578	0.789651	0.833709	0.525664	0.49081	1.63635	1.58035	1.81049	1.56132	1.73114	1.89017	12.5562	12.6505	13.6946	14.2389	15.1117	15.554	15.7597	14.8276	12.6201	10.1265	9.61526	0.304646	0.304764	0.361756	0.377848	0.37788	0.377518	0.37562	0.276366	0.234852	0.192702	0.186607	21.351	21.351
16449	Jag1	6.75756	5.45996	5.93599	5.54736	5.37117	5.05147	1.49483	1.12806	1.24114	1.44618	1.85202	1.64318	0.61667	0.674369	0.615969	0.529291	0.72075	0.662142	0.541932	0.610887	0.692821	0.587855	0.512097	0.515075	5.51565	5.51565	5.51565	5.51566	5.51617	5.53269	5.69939	5.61269	4.46305	4.45687	4.45681	0.340314	0.340314	0.340314	0.340315	0.340514	0.345139	0.37771	0.302466	0.275052	0.274985	0.274984	8.87406	8.87406
16468	Jarid2	2.20078	1.57932	1.61643	1.75395	1.69428	1.80875	5.05572	3.09887	4.00435	3.61118	3.92685	4.00735	0.358613	0.304807	0.328372	0.317754	0.31882	0.265559	0.926015	0.853824	1.1528	0.995529	0.931574	1.13428	2.04026	2.04026	2.04025	2.03998	1.95804	1.73489	1.69075	1.6856	1.68569	1.69207	1.81912	0.34899	0.34899	0.34898	0.34879	0.317902	0.28968	0.288411	0.288325	0.288344	0.289622	0.314028	10.4548	10.4548
16475	Ajuba	10.3236	8.7881	9.12671	9.05116	9.28192	9.60544	12.141	10.9024	11.5749	11.1822	10.0924	11.5678	5.95478	6.19033	5.21512	4.82827	5.61283	6.2432	4.42205	4.56946	3.75391	3.5682	4.53976	4.71858	34.0568	34.0568	34.0568	34.0568	34.0568	33.7882	32.5988	31.4042	29.0013	22.3947	22.3609	3.8778	3.8778	3.8778	3.8778	3.87769	3.67439	3.56851	3.56797	2.95208	2.54607	2.54605	49.6575	49.6575
16477	Junb	7.5327	7.63246	7.81355	8.41467	8.08332	7.60464	32.7354	31.2531	30.7791	37.7765	32.4208	29.2067	16.0792	17.4983	23.2277	23.9722	15.4843	12.0988	3.1689	2.78618	3.39825	3.70814	2.81623	2.05715	40.1667	40.1667	40.1667	40.1667	40.1086	37.9714	36.3357	34.0315	31.5439	19.5303	19.1531	0.606291	0.606291	0.606291	0.606291	0.585749	0.507488	0.507462	0.507462	0.396259	0.288973	0.28897	37.8672	37.8672
16480	Jup	2.38063	1.59869	1.69281	1.76753	1.50681	1.84658	6.12086	5.34196	4.95753	4.30119	4.1462	3.48607	0.414455	0.494278	0.275242	0.252035	0.254459	0.265806	0.683681	0.883081	0.515716	0.261102	0.354536	0.322441	5.49724	5.48499	5.43607	5.35254	5.02336	4.72337	4.48097	3.72931	2.8115	2.54385	2.46435	0.109396	0.105922	0.100666	0.0958511	0.0878244	0.0841121	0.0810533	0.0679546	0.0537182	0.0500164	0.0488315	5.94356	5.72565
16518	Kcnj2	3.25438	2.96694	2.42682	2.76217	2.62323	2.62944	9.58512	6.70693	5.72948	6.47389	8.3169	9.01478	0.918791	0.446526	0.300821	0.277933	0.854287	0.608792	1.16777	0.498517	0.397933	0.388225	0.830727	0.921852	20.0072	19.8019	19.3876	18.9833	18.1219	17.7046	17.5644	18.3213	22.7654	28.2272	32.6137	0.754149	0.68628	0.662519	0.654633	0.650483	0.65361	0.659883	0.709782	0.894799	1.09817	1.25383	28.1066	25.3256
16534	Kcnn4	0.897024	0.893042	1.0311	1.39265	0.839622	1.12907	0.776219	0.474531	0.283962	0.515504	0.0802378	0.0802378	0.0826202	0.0908678	0.0689729	0.0503218	0.0684973	0.0517126	0.420237	0.55003	0.611628	0.464141	0.378981	0.439573	0.946785	0.94686	0.947509	0.949933	0.986659	1.06996	1.15494	1.29322	1.08571	0.915912	0.872599	0.0321196	0.0321718	0.0324205	0.0330847	0.0382631	0.0429429	0.0446956	0.0440595	0.0343692	0.0303194	0.0294249	0.880326	0.88248
16549	Khsrp	3.36368	2.72177	2.98016	3.05485	2.94017	2.62351	1.95434	2.09828	2.07675	2.42003	2.43567	2.10205	1.8812	1.91082	1.90672	2.08387	2.3879	2.2845	2.43905	2.41095	2.61153	2.76457	3.0649	2.93673	25.7662	26.1149	26.6159	27.0535	27.8092	28.2571	29.544	34.2238	40.5558	40.6599	42.2278	1.33059	1.58041	1.67731	1.68985	1.69248	1.69165	1.68808	1.7952	1.87557	1.87745	1.97655	52.3325	52.3325
16562	Kif1c	2.29896	1.8173	1.70274	1.59306	1.74356	1.72074	2.57257	2.38644	2.58662	2.44218	2.32647	2.76178	0.781672	0.702682	0.486443	0.396601	0.545158	0.585682	0.907589	0.948353	0.694414	0.606703	0.801272	0.632471	16.5231	16.4794	16.3095	16.0329	15.0017	14.1277	13.517	12.542	11.9873	11.4216	10.9151	0.477464	0.459181	0.433803	0.412301	0.379233	0.368314	0.363753	0.356653	0.342761	0.326246	0.312431	17.6301	16.8056
16565	Kif21b	1.41734	1.29684	1.33469	1.199	1.0456	1.29087	1.42902	1.64285	2.54558	1.52067	2.71716	2.32552	0.525284	0.490718	0.49465	0.426143	0.62301	0.52695	0.36562	0.372605	0.422019	0.296629	0.897464	0.40104	0.579676	0.579679	0.579748	0.580396	0.631783	0.84669	1.00319	1.10687	1.01841	0.890646	0.874328	0.0564408	0.0564439	0.0564965	0.0568847	0.0740616	0.101209	0.106005	0.0635418	0.0665165	0.0659647	0.0651524	1.30002	1.30016
16569	Kif3b	0.849402	0.99412	0.964029	0.948823	1.30426	1.16018	3.77022	3.0413	3.12218	1.69597	1.99341	2.3498	0.224563	0.205499	0.157845	0.133653	0.139956	0.222638	0.504947	0.369483	0.297364	0.313956	0.324962	0.362751	5.51454	5.48231	5.39608	5.28715	4.96416	4.73223	4.59514	4.54781	4.91962	5.21303	5.41194	0.140535	0.13133	0.124532	0.120237	0.114405	0.112885	0.112944	0.1174	0.127248	0.134129	0.138794	6.59458	6.11137
16570	Kif3c	0.984715	0.838959	0.76959	0.762648	0.830611	0.818	5.14447	4.01924	4.14969	3.05103	2.77558	4.06342	0.401236	0.358535	0.338883	0.305723	0.329744	0.316408	1.08851	0.832962	0.970041	0.862395	0.688383	0.694159	3.36929	3.36208	3.32829	3.26239	2.92925	2.57053	2.30048	1.90374	1.82703	1.82501	1.83344	0.240134	0.23484	0.224409	0.211613	0.176317	0.155716	0.145114	0.13287	0.130074	0.130122	0.130794	5.60596	5.43134
16571	Kif4	1.25866	1.37776	1.27821	1.0814	1.32072	1.09576	5.47019	3.97249	3.69971	4.10572	3.39955	4.52692	0.428565	0.372875	0.308188	0.301982	0.223063	0.257928	0.878579	0.878066	0.863725	0.721053	0.613687	0.41703	33.9151	33.8812	33.7272	33.4118	31.4512	28.8637	26.6183	22.1793	21.6805	23.4666	25.9024	0.350215	0.343867	0.330117	0.297803	0.209205	0.22914	0.22039	0.211302	0.220746	0.241868	0.266996	29.207	28.6214
16576	Kif7	0.324016	0.361319	0.249101	0.393373	0.416319	0.113746	0.421167	0.0802378	0.167349	0.185679	0.127205	0.0802378	0.505968	0.40148	0.354045	0.421006	0.499115	0.460787	1.09324	1.13375	0.800094	0.898407	1.14449	1.3563	1.87485	1.87411	1.8702	1.85766	1.7811	1.73371	1.71675	2.00548	2.23163	2.28803	2.30666	0.219419	0.218517	0.216493	0.214008	0.208285	0.207007	0.208514	0.22234	0.239122	0.243939	0.245611	3.22394	3.20117
16580	Kifc5b	5.59007	4.51388	4.58413	4.99682	3.88666	4.32844	6.55066	4.71336	6.08155	5.00277	4.40766	5.63476	0.641032	0.490046	0.474914	0.511641	0.501866	0.534112	2.7816	2.4365	2.31753	1.78625	2.1793	2.32172	2.4878	2.44503	2.31451	2.17365	1.94848	1.89346	1.8817	1.91489	2.11485	2.34141	2.49881	0.674702	0.635218	0.585485	0.55309	0.518413	0.511221	0.509998	0.520851	0.576428	0.637338	0.679129	14.1529	12.997
16582	Kifc3	2.44025	1.32866	1.8398	1.9501	1.75991	1.72553	1.82586	2.77714	2.5178	2.18834	2.43162	2.66597	0.326594	0.334281	0.347206	0.336143	0.43006	0.381934	1.07367	0.968651	0.823009	0.789474	1.20914	1.02289	5.77885	5.77885	5.77886	5.779	5.80487	5.97321	6.13861	6.35017	6.11893	4.99148	4.77326	0.159729	0.159729	0.159734	0.159787	0.164789	0.174714	0.176064	0.176181	0.163333	0.134395	0.131649	6.52775	6.52776
16588	Kin	3.28608	2.81823	2.53097	2.74538	2.75131	2.64535	7.84851	6.52786	6.08815	6.56101	4.63236	5.31515	0.519867	0.422098	0.392478	0.349809	0.296621	0.311299	0.87512	0.74264	0.647843	0.641368	0.694074	0.582246	6.01365	6.01365	6.01365	6.01365	5.948	5.1031	4.71156	4.79016	5.86685	5.86758	5.86758	0.279524	0.279524	0.279524	0.279524	0.250639	0.207512	0.207489	0.249565	0.272734	0.272734	0.272734	11.4049	11.4049
16593	Klc1	3.68978	3.35296	3.26321	3.02009	3.6667	3.44996	8.42048	8.80064	7.19487	7.10612	6.90712	7.62004	0.909519	0.838502	0.761948	0.672085	0.725724	0.812655	2.36747	2.20757	1.7744	1.51381	2.08785	2.06885	26.526	26.3555	25.5076	23.0449	23.2727	23.127	22.7316	21.2927	20.1626	19.7337	19.4977	0.933012	0.873407	0.829925	0.80073	0.749663	0.72172	0.703563	0.666785	0.639944	0.62827	0.621493	36.0265	33.397
16599	Klf3	1.72461	1.29349	1.47463	1.25442	1.34074	1.27186	10.8595	6.33971	4.95716	7.85278	6.48845	6.76068	2.17839	1.77752	1.66935	1.42329	1.55654	1.50242	2.54975	2.13834	1.82807	1.42916	1.80225	1.69277	2.60614	2.57632	2.29673	2.15709	2.10955	2.10893	2.1089	1.83907	1.6595	1.65949	1.65949	1.21155	1.14562	0.992174	0.980949	0.980401	0.980401	0.980384	0.833824	0.771469	0.771466	0.771466	22.7386	19.9168
16600	Klf4	1.96561	1.59975	1.67871	1.90235	1.82775	2.0518	1.70337	1.67721	1.66206	1.16483	1.64404	1.50912	0.687486	0.795003	0.737333	0.434168	0.791352	0.66806	0.329775	0.40453	0.443875	0.383835	0.464011	0.331135	3.19227	3.19227	3.19227	3.19227	3.19227	3.19227	3.19226	2.7601	2.4248	2.42745	2.93647	0.209005	0.209005	0.209005	0.209005	0.209005	0.209005	0.209001	0.162851	0.158747	0.159076	0.208833	6.25214	6.25214
16601	Klf9	7.81072	9.47915	10.1503	10.3098	9.29735	9.43811	6.35253	11.8741	9.44245	12.6366	9.19625	8.25475	0.586549	1.34776	1.61325	1.55406	1.15302	1.03852	0.876537	1.07616	2.38102	2.57923	1.87282	1.77007	4.33302	4.52239	5.22999	6.65546	10.4543	12.7273	12.2875	8.32069	7.99952	7.99832	7.99831	0.261914	0.3253	0.61308	0.787466	0.778298	0.684446	0.581161	0.494447	0.494383	0.494383	0.494383	6.98574	7.43991
16646	Kpna1	3.36759	3.55916	4.02206	3.61848	3.58634	3.61054	5.02209	5.47452	4.86019	5.71274	5.16098	6.76883	0.440562	0.498537	0.547111	0.574043	0.580576	0.646056	0.626856	0.831481	0.864705	1.04849	0.962869	1.28661	14.7957	14.7958	14.8033	15.136	16.2572	16.8576	17.1652	17.4959	18.0903	18.1818	18.1827	0.343097	0.343326	0.391679	0.454303	0.427657	0.400215	0.400155	0.40022	0.414882	0.415152	0.415153	18.2451	18.2572
16648	Kpna3	3.69907	3.38436	3.5658	3.02846	2.92617	3.25695	2.86883	3.00386	2.59699	2.99875	2.20117	2.96565	0.522932	0.609154	0.71032	0.847745	0.775559	0.867164	1.00936	1.18997	0.875213	1.37655	1.15537	1.34671	37.9236	37.9234	37.8038	37.7729	41.4363	44.1969	45.8472	48.4354	51.583	51.6717	51.6733	0.598982	0.599192	0.726246	0.908823	0.818326	0.781976	0.781944	0.804484	0.835134	0.835142	0.835142	38.0362	38.0368
16709	Ktn1	3.28214	5.05293	5.0648	4.89389	4.9443	4.70716	9.21917	10.8122	10.4751	12.4086	10.2801	11.6389	0.562406	0.652045	0.787055	1.01321	1.04636	1.13548	0.998175	1.07935	0.842494	0.958011	1.6326	1.35232	25.1036	25.1037	25.0666	25.1931	28.8635	31.2781	32.6243	40.3295	41.4537	41.4575	41.4575	0.619414	0.61951	0.675062	0.868906	1.0569	1.06029	1.08399	1.05224	1.04507	1.04507	1.04507	36.134	36.1415
16765	Stmn1	6.84657	4.24605	4.55967	3.59881	4.17978	3.70897	17.8319	15.4767	13.6845	13.7404	11.1853	12.4368	1.66068	1.54988	1.32887	0.941108	0.85843	1.0622	2.18862	2.36482	1.75099	1.3068	1.17865	1.33666	125.85	125.81	125.486	124.94	122.612	119.715	116.377	100.936	80.4657	73.786	71.5641	1.04875	0.932423	0.820662	0.738901	0.615218	0.568192	0.545763	0.523108	0.553613	0.582947	0.599982	86.6058	84.722
16776	Lama5	0.888477	0.473672	0.529178	0.479004	0.521288	0.638248	0.0802378	0.665767	0.255549	0.337642	0.0884524	0.0802378	0.360869	0.344474	0.386512	0.334925	0.379868	0.367944	2.05481	2.49164	2.69839	2.55893	2.12619	2.0736	1.48026	1.48026	1.48026	1.48026	1.48006	1.4689	1.407	1.32026	1.21494	1.03527	1.02982	0.047602	0.047602	0.047602	0.0476019	0.0475636	0.0461422	0.0430216	0.0423925	0.0376255	0.0332047	0.0331145	2.96795	2.96795
16779	Lamb2	1.85751	1.36167	1.31901	1.65513	1.32004	1.77298	6.42286	5.61224	5.88902	4.53006	5.3736	5.59855	0.978015	0.691677	0.62531	0.486719	0.623685	0.586044	3.7901	3.38173	3.25524	2.77274	3.25893	3.36769	25.303	25.303	25.303	25.303	25.1496	22.6999	20.9299	18.6114	18.2689	17.0751	16.2362	0.83424	0.83424	0.83424	0.834239	0.753275	0.602362	0.602152	0.602151	0.602073	0.542129	0.534644	25.7701	25.7701
16784	Lamp2	0.412238	0.531291	0.272767	0.409542	0.629606	0.338067	3.45935	2.53726	3.35248	2.28572	2.85418	2.24896	0.547139	0.463806	0.406312	0.359263	0.37456	0.346411	0.50942	0.65713	0.570094	0.464026	0.507111	0.559881	22.3286	22.3278	22.3147	22.24	21.4186	20.6011	20.0552	18.9192	17.7357	17.6459	17.6411	0.535925	0.535445	0.530686	0.51309	0.464135	0.459356	0.458394	0.440248	0.423835	0.423439	0.42341	20.4613	20.4343
16785	Rpsa	7.89447	5.53615	5.45325	5.15094	5.47014	5.31106	23.414	21.4688	20.9921	25.3642	21.2925	22.9221	8.48863	8.35081	8.50143	9.99787	9.82434	8.45864	11.8789	13.1769	12.2368	12.8639	13.3463	13.016	918.755	918.735	914.069	905.599	880.469	861.553	847.819	821.614	811.924	752.622	746.827	84.6297	84.2427	77.7747	75.7018	74.7892	74.7615	74.7606	74.7606	74.2042	68.7488	68.7487	591.009	545.574
16796	Lasp1	3.89427	2.86822	2.56214	3.07471	2.89134	2.55955	10.9529	7.58667	8.3033	7.24491	6.00966	5.99132	1.5585	1.15971	1.09185	0.974335	0.807466	0.695498	3.28235	2.87952	2.2382	1.98116	1.76102	1.61531	34.5753	34.4936	34.2227	33.799	31.8268	29.4448	27.1012	19.7765	13.0461	10.7073	9.69086	0.608571	0.589563	0.56069	0.511406	0.40976	0.370179	0.339133	0.254739	0.208407	0.19039	0.175709	38.4644	37.1575
16800	Arhgef2	3.50454	4.55027	4.36089	4.63368	3.74574	5.37228	8.10758	10.0746	9.90857	7.01069	10.9629	10.494	3.87217	3.62366	3.79938	3.29842	3.7848	3.49656	6.44335	6.91589	7.84004	6.3126	7.68504	7.4275	13.6276	13.6221	13.6128	13.6053	13.5925	13.5877	13.5868	13.615	14.1515	15.8824	17.884	1.07128	1.06848	1.06796	1.06788	1.06787	1.06794	1.06811	1.0717	1.12415	1.27108	1.42337	25.4847	25.4107
16801	Arhgef1	3.1219	2.21056	2.12632	2.31146	2.20397	2.1015	2.26201	0.5162	1.42317	1.55234	0.655061	0.998133	0.551393	0.520901	0.43875	0.3488	0.47392	0.514455	0.774958	0.591189	0.594931	0.244304	0.500761	0.650726	3.29909	3.29909	3.29909	3.29908	3.11466	2.63151	2.60882	2.63053	2.62727	2.63055	2.63055	0.259202	0.259202	0.259202	0.259195	0.212911	0.206331	0.214042	0.21438	0.248736	0.250852	0.250853	11.5255	11.5255
16828	Ldha	10.537	11.3397	10.9519	12.5139	10.5074	11.7473	21.5209	23.3221	22.4217	26.0483	26.2061	27.3949	2.91071	4.90793	4.694	5.10898	5.35295	5.62422	1.7009	2.18217	2.66001	2.55979	3.21646	3.95021	599.644	599.406	599.024	598.949	599.095	599.238	600.949	640.573	731.494	772.914	776.52	1.84766	2.09473	2.52219	2.66573	2.71125	2.71276	2.86876	2.88985	2.82574	2.74558	2.73776	365.282	365.282
16832	Ldhb	2.00205	1.4706	1.22918	1.21992	1.51586	1.29278	8.30121	4.76394	5.14495	5.14619	5.65799	7.23653	0.823806	0.413811	0.379345	0.341198	0.660985	0.611235	0.647757	0.271257	0.278299	0.262287	0.565979	0.45827	121.581	121.48	119.256	115.884	108.549	104.309	101.86	98.8814	89.1129	66.8438	65.5191	1.2394	1.20869	1.02478	1.00523	1.00425	1.00425	1.00425	1.00409	0.826439	0.670428	0.667567	133.515	129.383
16834	Cog1	1.04828	1.34539	1.51036	1.56134	1.42441	0.99747	8.53117	6.77631	7.28596	5.60716	5.90514	6.75559	1.39474	1.34601	1.5558	1.58889	1.45572	1.4872	1.77335	1.85013	1.98813	2.25848	1.758	1.72277	8.96587	8.95743	8.94211	8.85051	8.28162	7.85319	7.60846	7.33049	7.03933	6.86371	6.84063	0.409275	0.41677	0.409961	0.408623	0.407042	0.402774	0.402272	0.401005	0.38316	0.376767	0.376041	10.9899	10.9483
16835	Ldlr	5.20004	3.60663	3.5427	3.72975	3.74112	3.68025	17.4135	20.9548	17.6988	21.323	17.2613	16.5656	2.32393	2.76875	2.81124	2.74325	2.40854	2.30468	4.36016	4.92539	4.36067	4.10351	4.52813	4.20291	33.9445	33.9445	33.9445	33.9445	33.9445	33.9445	33.9445	33.9437	31.5082	20.9825	21.8618	1.57182	1.57182	1.57182	1.57182	1.57182	1.57182	1.57182	1.57172	1.35838	0.950518	1.04629	44.863	44.863
[truncated: 3,960 more rows]
[truncated: 31 more columns]
