# Supplementary material for: Integrative analysis of RNA polymerase II and transcriptional dynamics upon MYC activation
Source: HighWire-hosted journal article supplement (doi:10.1101/gr.226035.117), 2017-09-13
Supplement: Supplemental_Code.zip [file EuMyc_RNAseq.xls]

"Gene.Symbol" "C1.RPKM" "C3.RPKM" "C4.RPKM" "C6.RPKM" "P2.RPKM" "P3.RPKM" "P4.RPKM" "P5.RPKM" "T1.RPKM" "T2.RPKM" "T3.RPKM" "log2.P.C." "qvalue.PvsC" "log2.T1.C." "qvalue.T1vsC" "log2.T2.C." "qvalue.T2vsC" "log2.T3.C." "qvalue.T3vsC" "Myc.binding.C" "Myc.binding.P" "Myc.binding.T1" "Myc.binding.T2" "Myc.binding.T3"
"1" "Nav2" 3.2 3.9 4.26 3.76 72.85 99.1 220.89 76.01 91.41 75.38 25.12 4.95459638794166 2.96e-116 4.59589386118657 1.42e-49 4.31772365544328 3.29e-41 2.73237832467055 4.17e-11 0 7.25 7.7 8.51 8.05
"2" "Bcat1" 5.54 3.95 4.2 6.1 35.04 83.38 262.86 159.86 235.87 252.97 89.27 4.77315836893182 7.41e-104 5.57514841823265 2.79e-86 5.67612278671999 1.64e-91 4.17340381354478 8.27e-36 0 8.4 9.81 10.1 9.42
"3" "Ptgr1" 16.08 13.06 6.79 18.12 112.09 288.48 658.21 455.56 293.41 323.66 45.05 4.80825072776219 8.88e-95 4.44055151871092 2.57e-37 4.58211255588991 1.82e-41 1.73723248807889 0.00194160321235879 0 6.46 7.09 7.91 5.97
"4" "Gm5424" 49.1 62.42 58.14 93.22 439.94 599.78 1222.82 1070.26 812.13 910.95 905.21 3.66425845397794 1.42e-73 3.62730629686654 3.92e-34 3.79296748450852 6.1e-39 3.78384813697563 7.02e-39 0 0 0 0 0
"5" "Rag1" 53.45 37.08 12.85 9.97 90.76 293.04 441.76 299.12 171.27 93.65 21.76 3.31065828028725 1.86e-73 2.59548807708819 7.9e-20 1.72456650850226 5.31e-08 -0.381033929377809 1 0 6.12 6.41 6.22 6.52
"6" "Uchl1" 11.58 12.5 7.78 13.14 92.44 223.43 549.05 488.99 22.08 200.49 0 4.91106302852363 4.81e-69 0.97281517067377 0.256695399295991 4.15553337346592 9.1e-20 NA 0.0584607802708694 0 7.19 6.6 9.22 0
"7" "Hist1h1a" 1597.7 1526.96 666.52 1475 5444.15 10261.69 18404.87 20374.04 14015.38 21267.96 6762.72 3.3710237443078 6.7e-66 3.41218212159957 8.2e-41 4.01385291897305 1.06e-56 2.36084678835017 3e-18 0 8.38 8.93 9.01 7.97
"8" "Hist1h1b" 1443.46 1535.64 711.7 1544.64 4336.48 8342.15 16069.42 17088.77 13448.02 12582.08 6127.87 3.13012426316655 6.28e-61 3.36101108006654 1.25e-39 3.26498774510297 1.68e-37 2.22707490136606 8.29e-16 0 7.34 9.25 9.01 8.45
"9" "Slc16a1" 62.77 73.94 64.71 92.73 218.71 396.41 1036.69 739.82 1589.86 956.55 651.73 3.02337027156101 4.23e-60 4.43427578880091 1.53e-73 3.70128834566751 9.29e-48 3.14772236940598 7.17e-32 7.48 9.39 11.4 11 10.2
"10" "Hist1h2bk" 459.73 733.56 156.91 395.52 1756.2 3684.56 4316.74 4997.69 4528.67 6636.32 3181.96 3.07932841272382 8.23e-60 3.37526523497834 3.05e-35 3.92656127361287 1.01e-52 2.86609351946894 2.37e-23 0 8 9.62 9.19 8.76
"11" "Uhrf1" 97.11 117.1 115.97 131.35 328.76 577.2 1690.63 1081.34 893.67 820.58 542.81 2.99439768906877 1.67e-59 2.9533177668433 9.51e-28 2.8302195640304 4.25e-25 2.2340228714551 4.78e-14 4.87 7.89 9.91 9.77 8.48
"12" "Hist1h2bj" 526.31 755.51 189.7 628.17 2118.48 3564.73 5076.4 5982.65 4313.47 6534.27 2822.61 2.9952460391751 1.22e-57 3.03867257922727 1.67e-27 3.63784972613909 4.36e-44 2.42685346249311 9.73e-16 0 8.29 9.69 8.4 7.92
"13" "Kif11" 84.98 82.04 70.36 95.65 287.75 402.19 1047.36 735.29 649.29 478.81 422.04 2.8922989856305 2.64e-56 2.96321084598878 2.53e-28 2.52380113947366 4.38e-19 2.34172759682854 5.4e-16 0 5.9 8.48 8.3 8.19
"14" "Hist1h2bm" 611.91 887.17 243.56 623.52 1883.36 3406.79 5353.55 7077.84 4917.92 6892.91 3479.88 2.90488444210446 8.32e-56 3.05550063457346 5.54e-29 3.54256554614786 1.52e-42 2.55648992493752 9.88e-19 0 7.03 8.56 8.16 7.78
"15" "2810417H13Rik" 128.54 129.1 80.74 173.42 380.65 716.77 1363.07 1332.63 898.63 676.23 352.48 2.8897329612899 2.65e-55 2.81214707843767 8.49e-24 2.40193387342531 4.52e-16 1.46196125277407 2.5e-05 0 0 7.53 7.36 0
"16" "Akap1" 7.71 10.49 8.31 11.79 74.67 102.15 215.49 134.47 300.63 329.9 391.1 3.78178427527053 3.47e-55 4.97257268634818 1.03e-58 5.10661248063997 3.21e-64 5.35212123880799 8.69e-75 5.54 6.26 9.17 9.67 8.49
"17" "Hist1h2bh" 596.06 702.21 238.88 437.4 1422.71 3101.78 4625.79 5369.27 4167.89 4609.85 1941.12 2.8784009353953 3.04e-53 3.0777933016392 1.76e-28 3.22319590702629 2.34e-32 1.97536540767766 6.7e-10 0 6.7 8.05 6.96 6.79
"18" "Ccna2" 80.36 99 72.69 121.72 276.41 421.52 1076.67 940.53 1199.74 740.21 405.89 2.86079859226612 5.11e-53 3.68249910460982 8.01e-46 2.98578384780002 8.29e-27 2.11893801816504 2.02e-11 0 6.62 9.25 8.86 7.87
"19" "Myc" 226.59 273.33 214.98 190.66 1017.35 1275.43 2407.88 1524.74 2123 2178.76 1759.44 2.78128439890234 6.69e-53 3.22922223264741 1.78e-36 3.26662514740387 9.28e-38 2.95823417789102 6.41e-30 0 9.14 10.8 10.1 10.3
"20" "Cenpf" 42.25 32.11 31.29 25.58 99.36 174.17 479.69 144.4 418.47 385.65 224.21 2.77400725441693 1.49e-52 3.67302663328624 1e-48 3.55519454410965 3.17e-45 2.77275305849976 1.29e-24 0 0 7.83 8.21 6.78
"21" "Ass1" 33.33 52.73 20.79 43.48 201.76 309.17 527.25 493.81 375.55 515.61 523.04 3.34920203144876 4.96e-52 3.32087205455076 8.28e-23 3.77814730072378 3.48e-33 3.79878833861653 8.97e-34 6.1 7.45 9.12 9.36 8.43
"22" "Tmem132e" 3.83 2.33 3.26 1.08 8.91 34.37 129.54 78.05 13.51 110.14 1.14 4.57847872503293 1.29e-51 2.3636383467722 0.000438381715135178 5.39087728059739 2.52e-42 -1.20328359838874 0.816099579297967 0 6.1 6.65 8.82 0
"23" "Ltbp4" 0.46 3.38 2.86 1.17 34.14 40.91 77.53 43.06 26.16 75.23 19.43 4.6356939238303 3.68e-51 3.7329269999906 2.44e-12 5.25687254951993 1.16e-37 3.30385036007786 7.37e-09 0 8.83 9.84 10.8 8.36
"24" "Hist1h2bl" 440.7 774.32 210.78 607.23 1225.98 2881.2 4037.6 6219.11 3158.36 3816.76 1993.33 2.8207431005725 1.37e-50 2.63554411939732 7.44e-19 2.90871696775566 2.03e-24 1.97154906698656 1.44e-09 0 8.17 9.9 9.2 9.43
"25" "Esco2" 26.25 28.84 21.24 33.33 109.1 161.41 377.08 352.36 236.24 285.11 117.06 3.18881857958454 1.86e-50 3.10721588283716 1.12e-20 3.37848126276422 2.94e-26 2.09421080503338 1.13e-07 0 0 7.56 7.96 0
"26" "Nt5dc2" 11.99 1.69 7.59 6.29 45.38 89.77 321.65 230.6 49.6 505.82 66.39 4.64050205855537 4.94e-50 2.84776423256995 1.01e-05 6.19797628878576 2.94e-64 3.26839006381788 2.58e-08 0 0 0 0 0
"27" "Bub1b" 93.83 102.22 74.9 117.66 258.36 414.57 1094.05 776.52 740.4 657.95 518.6 2.71042016319093 1.69e-49 2.92998186931152 4.07e-27 2.75965492661542 1.75e-23 2.41629918029424 6.7e-17 6 8.07 9.35 9.55 10.2
"28" "Spag5" 33.5 40.94 37.59 46.39 107.86 178.63 541.82 358.54 463.12 485.41 221.67 2.9053112240376 4.02e-49 3.54763157929608 1.08e-36 3.61544934757624 6.73e-39 2.48465905200848 2.29e-14 0 0 6.78 7.54 6.24
"29" "Mcm10" 32.5 27.35 26.05 40.34 109.62 164.51 445.28 293.71 354.41 345.61 256.88 3.00456405012372 2.04e-48 3.48925020095396 6.47e-32 3.45297585108161 3.11e-31 3.02492545971231 9.71e-22 0 5.87 8.17 8.35 7.3
"30" "Hist1h2bb" 1917.79 3034.46 918.97 2339.17 5129.05 10628.32 15571.53 20071.05 13036.48 18175.77 9076.54 2.64624429812306 5.4e-47 2.66703171994948 6.91e-24 3.14649382600999 8.52e-35 2.14469169053176 7.84e-15 0 6.92 8.7 8.46 8.01
"31" "Hist1h2bn" 726.05 1040.78 241.22 535.11 1655.44 3589.24 4223.03 6252.89 3436.85 3918.81 2254.4 2.62796214573902 6.22e-47 2.43446465682229 2.8e-17 2.623793396466 7.16e-21 1.82612128636994 3.92e-09 0 7.94 9.21 8.49 8.68
"32" "Hist1h4k" 871.14 1561.89 205.91 903.47 2888.75 5380.67 5609.84 7340.47 7137.86 8164.5 4830.82 2.5826031945196 6.47e-46 3.01076040517036 8.56e-30 3.20463333690921 4.48e-35 2.44753689799018 3.91e-18 0 6.45 8.21 7.69 7.5
"33" "Tpx2" 50.09 52.54 29.84 77.78 127.32 198.24 583.37 443.67 394.46 321.69 236.72 2.68555755328041 1.36e-45 2.9077732114758 3.19e-24 2.61356528883742 1.66e-18 2.17107580116405 9.62e-12 0 6.33 7.6 7.56 6.39
"34" "Hist1h4f" 1753.89 2584.01 606.29 1144.96 3691.51 7582.16 11553.25 11178.97 10411.15 14438.31 7336.25 2.48147189260341 1.56e-45 2.77381667755385 6.18e-27 3.2455891272571 4e-39 2.26880195030141 4.56e-17 0 6.02 7.77 7.62 6.44
"35" "Hmmr" 40.74 35.4 25.53 45.52 118.64 186.89 413.8 314.81 365.67 328.96 286.42 2.81267994431143 1.61e-45 3.31286261223227 1.57e-30 3.16023251075274 4.73e-27 2.96045257705335 8.49e-23 6.56 7.83 9.73 10 9.09
"36" "Cdk1" 34.63 43.85 27.14 46.8 119.85 193.73 455.53 369.72 449.84 211.69 184.94 2.90142827777757 4.49e-45 3.56135973152441 4.92e-34 2.47390089918011 7.31e-13 2.27900507328803 1.22e-10 0 0 8.18 7.82 6.96
"37" "Hist1h3g" 235.7 521.94 68.92 201.79 706 1621.71 2322.23 2328.16 2850.17 3055.01 1662.54 2.76250290141195 6.58e-45 3.47071660132495 1.59e-35 3.57084573156267 1.25e-38 2.69305768077625 1.2e-18 0 7.86 9.38 8.94 8.6
"38" "Hist1h3c" 485.71 1015.23 148.71 439.52 1340.66 3279.12 3071.9 4618.9 6091.53 6660.85 3247.3 2.55889693716401 6.58e-45 3.54387474088493 2.44e-44 3.67277640109004 9.61e-49 2.63631078115493 1.54e-21 0 6.92 8.7 8.46 8.01
"39" "Stmn1" 35.33 48.45 38.72 51.01 119.87 324.97 624.93 666.52 374.24 139.39 203.13 3.32291721288673 1.03e-44 3.10894495394375 3.66e-16 1.68410825144682 0.00102676157626584 2.22738451222547 6.81e-07 5.51 8.55 10 8.78 9.23
"40" "Aspm" 43.47 43.34 28.04 42.05 110.53 182.36 428.73 194.3 357.96 356.72 301.98 2.54537624094683 1.83e-44 3.18995303120091 1.61e-34 3.18494675245844 1.15e-34 2.9446076513626 1.25e-28 0 7.32 8.26 8.84 8.14
"41" "Hist2h2bb" 3124.07 3549.25 1082.32 3013.48 7872.65 13987.04 21082.66 24448.94 34607.11 51523.39 11317.46 2.64566177737156 2.32e-44 3.68416810403684 1.58e-45 4.25832715452397 1.51e-58 2.0716498428971 9.3e-14 0 0 9.22 8.82 7.08
"42" "Rrm2" 100.85 116.15 90.05 128.08 322.03 507.36 1189.33 704.1 762.16 833.69 425.67 2.64558322004388 2.46e-44 2.80864740722059 1.86e-22 2.93806454363788 2.29e-25 1.96828892990466 1.61e-09 0 7.18 9.23 9.71 8.59
"43" "Top2a" 338.29 344.79 264.08 354.26 1027.98 1566.18 4113.87 2521.52 2487.53 2974.36 1777.39 2.82617367880669 6.15e-44 2.93462729478353 1.41e-26 3.19249264364128 7.89e-32 2.44967364627125 3.83e-18 0 7.83 8.57 9.1 8.22
"44" "Ccnf" 30.79 40.08 39.45 48.34 106.48 177.45 494.68 359.13 359.51 309.01 224.68 2.84216054679142 8.39e-44 3.18009344660577 2.24e-25 2.96171507243422 4.91e-21 2.5019332539293 1.57e-13 0 6.7 8.24 8.12 7.78
"45" "Kif15" 76.14 81.72 53.65 78.29 206.21 314.3 646.73 494.38 501.5 524.94 444.25 2.5194609863137 3.96e-43 2.79119210594261 2.44e-24 2.85709493902827 5.57e-26 2.61631418135911 6.83e-21 0 6.88 7.71 7.97 7.29
"46" "Uck2" 71.48 87.68 66.17 89.64 274.57 412.69 874.04 735.23 919.44 1014.38 604.82 2.86616930222229 4.36e-43 3.54554100905399 3.98e-33 3.68731187835245 3.25e-37 2.94129142439792 4.89e-20 7.97 9.33 11.2 11.7 10.7
"47" "Espl1" 19.86 16.39 20.46 20.46 53.08 81.69 294.36 108.3 227.51 209.78 137.85 2.7999648457422 5.28e-43 3.55981794822565 2.63e-35 3.44276512999169 1.79e-32 2.83698725648949 2.98e-19 5.68 6.42 8.14 8.55 7.65
"48" "Snora15" 8914.02 3377.24 438.45 527.27 43497.99 23854.89 694.18 741.62 7005.8 5966.37 9855.9 2.37541901131228 1.97e-42 1.07986954768346 0.000115874949979594 0.848173192796409 0.00208532794109525 1.57230736291339 5.41e-09 0 0 0 0 0
"49" "Clspn" 29.82 32.13 25.61 35.76 81.28 145.78 388.68 189.26 317.05 234.58 153.38 2.70658198866953 2.72e-42 3.36230358228576 3.19e-32 2.92767322166118 2.15e-22 2.31470358018703 2.44e-12 0 5.99 8.92 7.34 6.5
"50" "Bub1" 30.64 32.22 23.45 33.72 89.79 136.84 333.5 247.56 311.93 361.68 230.15 2.750406643016 2.83e-42 3.37782727667466 2.99e-31 3.59131878825222 3.25e-37 2.93917940804449 1.08e-21 0 5.91 6.65 7.11 6.85
"51" "Hist1h3b" 596.64 1685.51 208.42 657.81 1641.36 4955.54 4044.16 6285.97 8231.93 8711.61 4663.71 2.42664727616726 4.2e-42 3.38662103405629 2.28e-41 3.46832968884507 3.82e-44 2.56686840098948 1.99e-21 5.41 7.24 9.07 8.25 7.67
"52" "Hist1h2ab" 773.49 1904.89 315.65 884.67 1806.5 5425.65 5957.22 7061.64 8959.69 8610.68 5529.54 2.38434876352001 6.6e-42 3.20787562253546 1.66e-37 3.15055397998295 2.59e-36 2.51158627407427 2.39e-21 5.41 7.24 9.07 8.25 7.67
"53" "Ankrd13b" 2.17 1.43 4.01 2.39 20.82 39.5 116.14 54.82 142.77 128.21 87.34 4.53156860881496 9.53e-42 5.83562095521956 1.17e-46 5.68043688716979 1.28e-42 5.12664253111817 7.27e-30 0 8.35 9.92 10.8 9.98
"54" "Hist1h4b" 611.73 1171.42 191.61 769.94 1889.7 3837.64 4239.03 5940.12 5792.99 7812 3773.14 2.53489514485906 1e-41 3.07765970557191 2.6e-29 3.50904348019996 2.85e-41 2.45911716241365 7.37e-17 0 7.08 7.82 7.6 7.27
"55" "Hist1h2ba" 553.66 1430.78 413.61 1057.24 1371.13 4055.66 6289.01 7400.04 5315.96 5395.45 3434.41 2.46788989219545 1.09e-41 2.62152344902976 6.52e-21 2.64293649065356 1.81e-21 1.99125547856124 5.28e-11 0 0 0 0 0
"56" "Car12" 0.65 0.96 1.2 1.19 25.58 40.77 60.51 34.63 165.16 175.78 332.54 5.33530102096586 1.44e-41 7.36772051340145 6.73e-69 7.45762712179055 1.36e-72 8.377384077248 6.17e-114 0 8.02 10.2 10.4 10.1
"57" "Pbk" 25.69 19.59 15.18 26.39 87.74 136.79 367.83 302.06 241 316.54 136.5 3.36435469439467 1.57e-41 3.47243539240693 7.9e-20 3.86579006521138 1.97e-27 2.65230319709682 1.32e-09 0 7.24 8.34 9 7.29
"58" "Nek2" 40.05 42.96 30.7 58.5 118.37 184.01 487.36 339.64 332.27 386.75 201.68 2.71329016260016 3.48e-41 2.94818712033099 9.6e-22 3.16723237117228 1.69e-26 2.22789910280706 9.17e-11 0 6.17 8.06 8.28 7.16
"59" "Anln" 28.3 35.47 25.68 22.57 79.76 140.29 298.77 184.31 294.49 294.48 227.95 2.65003511694739 4.71e-41 3.39446231187904 1.14e-33 3.3944133214367 5.96e-34 3.02496107580477 5.07e-25 0 7.72 9.01 9.78 8.64
"60" "Cdc6" 17.3 14 14.72 20.97 65.66 85.79 199.81 163.17 166.94 181.78 128.24 2.94095712173155 9.53e-41 3.3173120190214 3.1e-24 3.44017582148142 4.85e-27 2.93682867361092 1.72e-17 0 6.19 7.76 7.98 7.43
"61" "Hspa12b" 6.57 2.44 4.55 2.71 23.29 57.47 123.38 82.63 11.47 127.21 2.78 4.13960795050033 1.15e-40 1.4956511403433 0.0531173881344096 4.96692592946257 4.79e-34 -0.54905746294902 1 0 0 0 8.63 0
"62" "Nusap1" 95.9 123.07 71.44 114.7 247.05 370.51 796.88 820.64 432.19 384.69 295.71 2.46394086757156 1.34e-40 2.09335199365537 1.09e-11 1.92538262943528 1.23e-09 1.5458693338879 4.06e-06 0 0 8.73 8.81 7.76
"63" "Ccnb2" 72.9 85.26 58.48 79.38 207.02 321.17 716.28 716.94 543.8 425.33 299.19 2.72812458128688 4.66e-40 2.87738149940687 1.65e-19 2.52288796488141 5.97e-14 2.0153673040468 3.3e-08 0 0 7.28 7.18 5.96
"64" "Ncapg" 81.66 76.87 54.53 99.24 211.34 330.51 706.05 486.51 662.54 734.5 454.41 2.4734405054311 6.03e-40 3.08507498869088 7.33e-30 3.23382992142307 5.96e-34 2.54106201458548 2.14e-18 0 7.05 8.33 8.28 7.29
"65" "Cplx2" 45.38 52.87 34.79 31.32 92.99 151.26 521.35 169.72 494.29 101.28 1.43 2.50860080149977 1.14e-39 3.58849848393586 2.87e-42 1.30149007426069 0.000435799407427279 -4.84470027838927 3.78e-09 0 9.18 10.4 9.78 0
"66" "Kif14" 11.85 13.62 9.46 11.83 32.1 62.11 151.85 68.82 118.24 138.83 82.06 2.75145529080758 3.53e-39 3.33837133961449 3.91e-28 3.56997252093523 3.84e-34 2.81140422436088 6.73e-18 0 0 6.55 8.05 0
"67" "Lars2" 587.96 128.95 303.71 146.63 112.58 1461.83 322.19 4105.66 184.54 174.9 169.45 2.36239222495563 5.6e-39 -0.661108121669862 0.410027983520519 -0.738511394207899 0.322221861098213 -0.784182046645557 0.263208332597347 0 6.23 7.71 8.16 7.64
"68" "Birc5" 23.34 17.83 16.98 27.77 65.02 101.14 273.53 203.25 186.72 239.68 124.01 2.90361821121469 5.8e-39 3.11981056772194 4.24e-20 3.48004363047334 1.75e-27 2.52939056385932 1.33e-11 7.36 8.6 9.41 9.8 8.86
"69" "Cdca7" 125.35 118.38 130.01 158.81 349.22 552.84 1057.29 919.53 825.28 790.96 364.29 2.43451876606039 1.54e-38 2.63196669493763 8.31e-20 2.57068775404979 9.39e-19 1.45217040939475 4.15e-05 6.54 8.37 10.3 10.5 9.39
"70" "Akap12" 159.72 144.54 143.4 120.04 228.12 491.96 1524.68 682.59 581.74 408.3 18.54 2.36639460092663 1.67e-38 2.03524576457751 1.58e-12 1.52450082595027 1.05e-06 -2.93641559253671 1.13e-07 0 7.24 8.73 9.11 5.8
"71" "Cdca3" 35.72 46.56 51.57 95.91 144.36 214.07 667.77 631.86 316.83 329.24 198.18 2.85129665500848 2.07e-38 2.4635812935242 8.15e-11 2.51901196792572 2.07e-11 1.78668372118363 4.64e-05 0 8.01 9.21 9.61 8.81
"72" "Kif2c" 19.63 24.48 21.44 33.2 81.07 123.19 291.52 250.37 236.04 204.91 171.19 2.91761303416475 3.01e-38 3.2571787101605 5.57e-22 3.05313773905538 1.89e-18 2.79374577641793 1.46e-14 0 7.26 8.25 8.64 7.91
"73" "2900026A02Rik" 5.79 4.71 7.79 4.86 24.11 37.32 134.94 35.04 43.99 12.18 39.89 3.32136711087183 3.42e-38 2.92616340776253 1.2e-11 1.07350193975873 0.115690743465616 2.78501492993956 2.32e-10 0 0 5.41 0 7.04
"74" "Hist1h2ak" 995.89 1744.48 288.35 678.91 2016.58 4556.81 5319.6 5991.29 6016.46 7114.93 4356.24 2.27012285465284 6.73e-38 2.69841759671407 1.35e-24 2.94035228437728 1.86e-30 2.23258616065768 5.38e-16 0 7.94 9.21 8.49 8.68
"75" "Kif18b" 21 17.54 23.27 31.09 64.94 96.73 278.73 234.32 230.23 213.79 112.25 2.86053842500912 7.73e-38 3.30932533362299 9.65e-24 3.20244387103937 9.2e-22 2.27296494324586 7.33e-09 0 0 7.06 7.82 6.25
"76" "Eps8l2" 0.39 0.78 0.87 1.16 10.14 23.7 74.85 46.63 3.15 60.17 7.25 5.60102789702112 1.53e-37 1.97727992349992 0.103726691350312 6.23290054654249 1.09e-27 3.17990909001493 0.00103257239445217 0 6.79 6.51 7.97 6.8
"77" "Kif20a" 48.94 50.06 41.63 63.65 129.49 182.35 472.91 375.69 348.69 287.12 217.1 2.50605206147208 2.55e-37 2.77139702582696 3.75e-20 2.49110586410366 2.54e-15 2.08781176179009 4.42e-10 0 8.04 9.1 9.52 8.36
"78" "Fstl1" 3.68 2.98 2.97 4.18 29.38 46.86 79.78 64.38 35.41 381.69 29.83 3.99633899920047 4.42e-37 3.35844352413287 4.81e-10 6.7886161647807 9.84e-100 3.11105065807716 2.63e-08 0 0 0 5.99 0
"79" "Hist1h3a" 1375.37 3491.46 626.6 1879.08 3100.03 8898.91 10484.53 12901.96 15911.78 14907.87 9219.15 2.26292767162416 6.2e-37 3.10986745512406 2.55e-34 3.01584636434869 2.09e-32 2.32247786703878 3.11e-18 0 8.38 8.93 9.01 7.97
"80" "Hist1h2bc" 514.38 790.79 281.9 630.72 1221.71 2264.67 3149.27 4186.18 2572.15 2946.67 1809.95 2.28674981339648 7.85e-37 2.21385201390324 1.66e-14 2.4099627360801 7.7e-18 1.70682707848135 2.94e-08 5.42 7.75 8.91 7.94 7.64
"81" "E2f8" 24.87 24.27 18.13 25.22 57.21 102.6 316.75 145.53 216.91 184.5 95.43 2.74975402006226 1.08e-36 3.22972727049224 6.93e-24 2.99625152100679 1.36e-19 2.04514548243234 1.38e-07 0 6.63 9.33 9.59 7.67
"82" "Dtl" 52.9 53.72 40.13 44.09 129 214.33 436.6 248.42 396.85 421.68 239.5 2.42989587433213 2.51e-36 3.05623021404711 1.93e-27 3.14378500574523 9.49e-30 2.3276620645266 6.74e-14 6 8.75 10.2 10.6 9.49
"83" "Kif4" 34.35 36.25 28.22 39.88 83.8 136.08 323.57 240.94 268.43 239.53 150.99 2.49960335541269 2.8e-36 2.95257812989961 2.98e-23 2.78823857034901 3.94e-20 2.12248521600709 2.72e-10 0 0 6.21 7.75 6.15
"84" "Hist1h3d" 376.21 880.53 104.21 353.71 749.51 2547.19 3049.75 2668.32 3499.89 3573.3 1790.89 2.3943681509611 4.06e-36 3.02938704680135 1.4e-27 3.05933450922341 1.64e-28 2.0627541941675 4.16e-11 0 8.87 9.74 8.32 9.02
"85" "Rag2" 3.2 1.41 1.84 0.78 7.54 30.27 76.8 53.3 39.8 39.29 0.69 4.53754869616569 8.82e-36 4.46070087847989 5.76e-16 4.44209461550757 7.38e-16 -1.38932738017295 0.966116664562039 0 0 5.95 6.36 0
"86" "Cdc20" 52.82 68.96 52.52 89.93 163.45 250.67 637.46 557.4 502.17 401.65 289.27 2.60628021222338 1.21e-35 2.92638156773774 4.58e-20 2.6041446007167 1.01e-14 2.13062243428094 4.4e-09 0 0 8.21 8.17 7.7
"87" "Snora43" 3067.73 1434.99 1129.79 1064.98 15500.04 12711.95 2825.52 3489.25 12491.18 8775.42 25214 2.36602253057226 2.58e-35 2.89921734286047 4.59e-26 2.38984765384895 2.65e-16 3.91253258131569 2.95e-56 6.08 8.96 10.2 10.1 9.83
"88" "2010317E24Rik" 9.29 9.18 8.86 13.63 43.93 63.16 158.94 123.28 292.84 200.4 80.99 3.24863178245483 2.59e-35 4.83782500919669 6.18e-51 4.29059488808257 3.14e-35 2.98352807116509 4.46e-12 0 0 0 0 0
"89" "Ttk" 23.71 28.79 17.51 22.59 78.69 111.12 278.07 176.81 227.95 249.04 143.86 2.79952150694191 4.21e-35 3.29963331060453 2.88e-23 3.42729338332158 4.66e-26 2.63558141061929 6.92e-13 0 0 7.19 7.5 0
"90" "Aurkb" 67.9 90.33 84.81 97.38 194.78 269.86 785.29 624.08 487.97 479.67 278.65 2.4607409471185 8.57e-35 2.51947665556818 3.91e-15 2.49472641266259 8.11e-15 1.71113835419119 3.35e-06 0 7.2 8.7 9.01 8.05
"91" "C330027C09Rik" 41.64 37.57 37.5 44.61 111.56 167.36 409.46 206.25 298.25 301.63 199.35 2.47136582679029 9.64e-35 2.88659682706408 1.18e-21 2.90285461476211 4.33e-22 2.30537829447882 2.38e-12 0 0 7.62 7.85 7.02
"92" "Thbd" 22.42 25.7 11.28 20.5 35.89 96 201.66 191.3 262.36 355.56 13.53 2.71563775703303 1.38e-34 3.71528037190145 3.73e-34 4.1538256238671 3.46e-47 -0.562033663838802 0.747022104611519 0 8.26 9.21 9.88 6.14
"93" "Cenpe" 51.33 35.01 38.6 41.64 101.32 144.49 404.48 160.91 626.1 330.44 199.95 2.28384245471632 1.42e-34 3.91017790359397 1.98e-55 2.98817313897719 1.87e-28 2.26342408352311 2.44e-14 0 0 7.54 7.25 6.73
"94" "Hist1h3h" 349.03 908.03 111.54 414.15 777.35 2374.9 2126.44 3445.21 4197.87 4496.01 2668.92 2.2908688288003 1.48e-34 3.23555308581596 4.4e-34 3.33454084039505 4.33e-37 2.58215165781669 1.33e-19 0 8.17 9.9 9.2 9.43
"95" "Ncaph" 69.5 82.91 63.92 96.74 184.92 280.76 659.84 499.86 443.54 397.11 231.09 2.37621987373719 2.72e-34 2.50257894917782 4.21e-16 2.34305342264136 1.08e-13 1.56196956261117 1.54e-05 0 0 7.27 7.96 7.08
"96" "Ckap2l" 38.89 39.98 29.58 42.1 90.91 141.89 363.73 274.88 224.08 186.98 141.01 2.53310896115518 5.31e-34 2.57377118046247 1.08e-14 2.3126412548636 3.12e-11 1.90555476973055 2.89e-07 0 0 7.45 7.85 6.26
"97" "Exo1" 15.8 19.52 14.75 20.93 51.3 77.83 177.02 129.18 183.95 228.4 103.29 2.61621851460877 5.94e-34 3.37342274658093 4.76e-28 3.6856717209708 3.49e-36 2.54080965701167 2.84e-13 0 0 8.05 8.67 6.27
"98" "Hist1h4a" 2172.03 5106.78 1086.75 3400.8 4658.33 11901.99 16391.26 19793.87 18484.24 19205.98 13637.32 2.16437856515733 7.43e-34 2.65162764443886 8.89e-24 2.7068874980774 3.93e-25 2.21289207213426 5.09e-16 0 8.38 8.93 9.01 7.97
"99" "Hist1h4j" 720.14 1359 254.53 929.04 1857.47 3468.5 4170.86 5992.22 4888.68 5504.72 3799.4 2.24710599414994 1.44e-33 2.58337421163055 1.2e-19 2.75459842051613 3.58e-23 2.21970084479375 9.23e-14 0 7.28 8.76 7.7 7.93
"100" "Sgol2" 27.51 24.72 20.49 32.69 68.12 98.41 232.87 182.16 148.17 199.65 102.62 2.46391630478316 2.42e-33 2.49124163598051 3.49e-14 2.92146133340132 1.42e-21 1.96130019207233 4.17e-08 0 5.36 7.01 7.8 6.96
"101" "Cdca8" 47.55 42.6 36.77 45.25 111.87 164.63 522.33 342.44 346.3 310.86 149.69 2.72873445735339 2.42e-33 3.00818860729617 4.12e-18 2.85243120918281 9.18e-16 1.79814406552414 3.31e-05 0 0 8.25 8.9 6.87
"102" "Hist1h2bf" 336.08 413.8 156.91 272.21 666.97 1168.27 2099.55 2652.63 1591.84 1819.45 549.78 2.48214981793061 2.53e-33 2.43313161580077 3.45e-13 2.62593868694643 4.82e-16 0.899362611969514 0.0385846782307979 0 8.87 9.74 8.32 9.02
"103" "Hist1h2af" 184.42 553.13 106.71 160.14 527.98 1613.1 1730.03 1861.51 3454.63 2558.21 1342.9 2.51286071610023 3.01e-33 3.78219726871503 3.44e-41 3.34880076424387 6.48e-30 2.41901794373465 4.72e-13 0 8.18 9.38 8.94 8.6
"104" "Hist1h2ah" 93.64 185.18 27.67 84.75 323.59 946.4 775.37 1102.71 1775.9 2167.29 982.73 3.00834183805495 3.22e-33 4.1824245638801 6.52e-37 4.46976642730132 2.45e-45 3.3287412204041 3.19e-19 0 8 9.62 9.19 8.76
"105" "Ccnb1" 16.17 16.5 16.57 27.56 49.73 89.6 242.4 222.87 212.93 93.54 110.15 2.97680276290655 4.48e-33 3.47120101133628 1.77e-21 2.28447711781042 6.8e-07 2.52029127897973 4.8e-09 0 6.84 8.15 7.43 7.54
"106" "Nuf2" 34.66 31.78 19.29 56.02 88.18 160.92 353.14 287.57 285.77 395.4 168.35 2.65014857695525 5.4e-33 3.01150573576955 2.68e-19 3.47996413589962 4.96e-29 2.24811498599805 3.39e-09 5.98 7.16 7.87 7.9 6.74
"107" "5730590G19Rik" 15.61 17.43 17.86 18.23 42.68 65.03 188.97 93.29 160.35 126.44 74.15 2.495979312407 8.06e-33 3.21384052302183 1.6e-26 2.87106910959732 1.12e-19 2.10113476703481 4.81e-09 0 0 0 0 0
"108" "Tfdp1" 81.72 107.49 104.97 108.98 291.97 382.07 900.43 549.08 949.7 716.21 572.02 2.39705366568716 8.06e-33 3.23611934635595 1.22e-29 2.82903015503324 7.26e-21 2.50471308277444 2.85e-15 7.71 9.09 11 11.4 11.1
"109" "Kntc1" 26.03 29.86 24.35 33.87 78.53 108.96 245 145.87 206.82 276.09 220.39 2.34154255002841 1.43e-32 2.8579504771697 2.19e-22 3.27471340698308 3.08e-32 2.94963353702206 1.67e-24 0 7.74 8.86 9.46 8.11
"110" "Hist2h4" 1787.66 2920.76 692.29 1839.07 3480.36 6282 10681.17 10063.4 15342.08 24398.59 5366.77 2.07511924171944 3.68e-32 3.08347632629079 3.92e-34 3.75278001357102 3.07e-53 1.56810820299601 9.35e-08 5.49 7.96 10.1 9.63 8.95
"111" "Ncapd2" 189.2 178.07 203.2 212.08 372.8 570.27 1598.09 947.34 981.64 742.25 553.99 2.15635199444271 1.2e-31 2.32701110324518 2.43e-16 1.92372225412512 1.63e-10 1.50167700052589 2.76e-06 5.04 8.15 9.22 8.77 8.23
"112" "Lig1" 95.44 82.71 96.61 96.26 178.96 272.37 911.26 367.37 480.86 385.34 160.59 2.22116981718555 1.21e-31 2.37411996356779 2.8e-15 2.05463499384329 9.24e-11 0.791885100419295 0.0640541886092031 5.62 7.02 8.2 8.35 7.37
"113" "Cdca5" 20.91 27.57 28.09 38.14 104.55 112.68 351.93 239.18 218.88 122.4 127.09 2.81697107419757 1.92e-31 2.93214896960131 1.32e-14 2.09361239229543 3.85e-06 2.14785935148436 1.13e-06 0 5.96 8.4 8.38 8.11
"114" "Shcbp1" 39.09 28.57 26.79 37 93.47 126.04 345.27 255.13 260.72 240.21 172.35 2.64095141450683 9.35e-31 2.98798711523316 9.75e-18 2.86978207007887 5.59e-16 2.39082715674922 5.79e-10 0 0 0 6.35 0
"115" "Dut" 129.61 155 112.39 162.4 304.31 453.22 935.57 798.9 791.56 673.24 311.66 2.15535190943517 1.21e-30 2.50081845652523 5.06e-18 2.26724064193764 3.15e-14 1.15609275034799 0.00163262005975383 5.9 7.33 9.29 9.08 8.48
"116" "Kif23" 75.83 78.46 63.05 71.95 163.87 260.22 539.86 368.46 394.29 363.6 351.57 2.20344972783533 1.29e-30 2.44674066728725 3.19e-16 2.32983574560345 1.9e-14 2.28129551445439 7.82e-14 4.65 6.41 8.8 8.76 8.31
"117" "Lmnb1" 244.23 263.32 202.68 221.92 444.83 658.14 2052.22 771.22 1157.84 848.03 630.77 2.07457679373736 1.32e-30 2.31280186873548 1.18e-16 1.86355317302101 3.54e-10 1.43655191625578 5.14e-06 5.6 7.97 10.5 10.6 9.86
"118" "Hist1h2ai" 620.89 1513.5 183.91 554.86 1328.1 4015.59 2864.69 4036.71 6654.61 6334.75 3751.78 2.0914931368297 1.37e-30 3.21171578240428 8.7e-36 3.14064934909593 3.19e-34 2.38493689673954 1.25e-17 0 8.17 9.9 9.2 9.43
"119" "Plk1" 27.96 28.73 23.09 30.98 63.9 119.16 346.21 191.25 252.31 195.66 95.61 2.70160151807852 1.71e-30 3.18776042809327 6.2e-20 2.82091188810269 2.42e-14 1.78779646613208 6.58e-05 0 6.48 8.04 8.43 7.1
"120" "Hist1h3i" 337.63 680.04 72.05 267.95 662.38 1823.78 1789.85 2064.4 2438.95 3155.64 1429.44 2.22344327895127 2.18e-30 2.84512732657664 3.25e-23 3.21679977428032 5.48e-32 2.07431720915624 4.8e-11 0 6.37 8.55 7.77 7.69
"121" "Neil3" 27.34 25.98 24.95 31.87 80.33 131.71 323.69 180.39 282.57 245.55 170.88 2.70086284609338 2.56e-30 3.35926979160095 4.35e-23 3.15667830893179 1.71e-19 2.63364503853668 4.87e-12 4.93 0 6.91 7.06 6.76
"122" "Hist1h2bg" 862.28 1013.77 397.54 557.8 1532.4 3102.55 3181.95 3814.26 2985.94 3553.12 1529.82 2.03841259992054 2.8e-30 2.07667469403964 2.75e-13 2.32757593186786 2.42e-17 1.11185143214687 0.000545188702953077 0 8.87 9.74 8.55 9.02
"123" "H2afx" 777.76 1879.91 398.54 934.69 1554.42 4108.24 4914.07 6066.03 8074.68 9197.94 5684.81 2.0601086720055 3.47e-30 3.01669095717218 4.9e-31 3.20459665707492 2.16e-35 2.51039800190529 3.45e-21 5.64 8 10 9.85 9.05
"124" "Chaf1a" 46.38 43.69 59.07 46.89 97.27 166.24 495.34 225.25 414.43 310.98 172.98 2.32773046535255 3.51e-30 3.08005398334053 1.73e-25 2.66574734144422 1.65e-17 1.81953078455442 5.59e-07 0 0 7.73 7.46 6.33
"125" "Hist1h4d" 3747.82 6182.49 1510.01 2812.69 7529.51 12527.19 16702.91 20395.27 20339.23 23962.97 12257.08 2.00361005915144 4.1e-30 2.51299843807595 8.19e-22 2.74954010382118 1.02e-26 1.78234870242547 1.02e-10 0 7.68 8.45 7.65 7.59
"126" "Hmgb2" 135.52 169.04 68.94 81 240.41 447.86 886.65 355.8 653.04 498.1 217.78 2.08678675507166 4.65e-30 2.522891068002 1.3e-19 2.13215511659112 2.72e-13 0.938591174669011 0.00658108650685508 0 6.86 8.31 8.51 7.48
"127" "Brip1" 19.17 24.64 16.35 23.15 56.31 82.93 174.93 105.45 134.82 139.45 112.95 2.33252185854042 7.63e-30 2.69447294736106 9.51e-18 2.74318635137567 1.07e-18 2.43912268774044 7.52e-14 0 0 8.36 8.27 7.13
"128" "Racgap1" 41.86 53.22 46.53 71.67 121.28 181.83 443.26 317.45 303.63 274.61 256.05 2.31843347458949 8.93e-30 2.50956565696941 9.22e-15 2.36463547704573 1.14e-12 2.26367687354728 1.58e-11 0 0 7.37 8.57 8.74
"129" "Chek1" 18.14 24.26 18.39 27.4 62.43 93.16 203.28 171.29 152.63 151.41 88.53 2.58774084377129 1.02e-29 2.79135157641964 5.52e-15 2.77977351171444 7.01e-15 2.00555134584802 1.02e-06 0 5.59 8.68 8.53 8.14
"130" "Ube2c" 38.93 50.03 30.67 62.84 108 232.92 545.88 442.37 432.57 353.2 216.19 2.86479444193406 1.02e-29 3.24527432448176 1.38e-17 2.95282605383727 1.44e-13 2.2446405027298 7.56e-07 0 7.81 8.84 9.43 8.25
"131" "C79407" 46.31 56.49 38.21 45.9 106.72 176.41 350.24 241.98 345.79 361.18 267.72 2.22751622181247 1.8e-29 2.88755239010856 3.37e-23 2.95037424939672 1.12e-24 2.51838116165183 1.59e-16 0 0 0 0 0
"132" "Alpl" 45.61 49.85 47.88 46.86 128.61 152.99 420.59 286.73 659.42 471.12 0.47 2.37833657077024 2.78e-29 3.79368039795761 1.37e-41 3.3085773324394 9.4e-29 -6.66064077407029 1.38e-08 7.27 8.82 10.8 10.9 7.12
"133" "Mki67" 345.07 295.9 267.64 325.01 860.83 1284.2 3319.91 1329.42 3439.76 2777.89 2175.35 2.46143960144304 3.44e-29 3.47940984810027 1.11e-30 3.17109141186134 3.01e-26 2.81834947993328 4.57e-21 4.81 0 7.16 7.31 7.11
"134" "Smyd2" 45.16 46.14 43.36 32.03 198.19 213.33 322.33 273.91 468.78 559.96 417.77 2.59591263667189 8.59e-29 3.49174346268915 4.3e-27 3.74815621650911 1.95e-33 3.32554133907883 7.97e-24 7.03 8.33 9.86 10.4 9.97
"135" "Hist1h2ag" 188.99 469.68 41.5 133.06 430.95 1412.66 907.42 1447.85 2041.87 2522.45 1432.44 2.3332178690201 1.46e-28 3.29310432800001 7.35e-29 3.59803898362741 7e-37 2.78168802181046 7.9e-19 0 8.29 9.69 8.4 7.86
"136" "Ncapg2" 86.15 92.42 59.72 81.88 179.38 279.19 554.34 277.76 492.41 464.11 446.53 2.01121013940075 1.66e-28 2.62102192743252 3.69e-22 2.53562864969745 1.45e-20 2.47991897234582 1.48e-19 0 6.84 8.51 8.38 7.54
"137" "Cks1b" 70.21 74.16 55.4 98.36 201.65 302.91 736.59 631.75 805.95 450.53 310.71 2.65126040945707 5.78e-28 3.43474878170769 1.38e-23 2.59568161870329 5.78e-11 2.05962711735345 2.3e-06 5.33 7.68 10.1 9.78 8.53
"138" "Cenpi" 16.88 20.49 15.59 19.43 52.85 81.74 186.06 131.04 181.93 213.5 177.69 2.64147065280394 6.07e-28 3.3295211395929 6.81e-22 3.56037374845831 1.12e-26 3.29550017057925 1.92e-21 0 6.02 6.59 7.25 7.11
"139" "Hist1h2ae" 164.72 290.11 54.5 130.95 332.4 983.03 797.43 991.06 1164.64 1652.17 743.01 2.2773165229085 1.3e-27 2.86310922336604 1.79e-20 3.36758728919772 1.27e-31 2.21467868163106 4.62e-11 0 8.87 9.74 8.55 9.02
"140" "Pif1" 10.18 13.96 14.31 13.01 36.02 51.31 132.53 120.57 165.79 153.66 76.95 2.72583481627352 1.42e-27 3.68783362784897 1.01e-26 3.57821829658482 1.3e-24 2.58046986948177 4.68e-10 0 0 8.63 9.16 7.61
"141" "Elovl6" 17.06 17.47 17.4 13.56 37.65 68.37 153.11 84.03 472.85 104.39 88.91 2.3895348606003 1.54e-27 4.8520360605587 3.57e-78 2.67263697994646 3.27e-15 2.44107106178533 3.49e-12 0 8.8 10.9 10.3 9.58
"142" "Hist1h1d" 487.73 587.36 300.02 498.74 872.33 1537.69 2365.5 2743.66 2231.66 2066.96 1270.04 2.00456986699034 1.55e-27 2.25211177386919 9.21e-16 2.14150499868221 3.44e-14 1.43886846431157 2.54e-06 0 7.47 9.28 8.74 8.32
"143" "Ptprs" 64.11 67.74 84.3 71.73 198.7 251.11 420.42 301.71 389.02 915.91 724.23 2.02535924118386 2.05e-27 2.43437676439182 1.68e-17 3.66973827838019 6.68e-48 3.33098037578308 2.96e-38 6.65 7.56 9.89 10.6 9.64
"144" "Tyms" 18.72 22.9 18.51 20.95 62.65 96.73 158.8 135.19 219.43 212.09 159.18 2.48327093557509 2.41e-27 3.43634278748664 3.75e-27 3.38725860577932 3.02e-26 2.97324108748295 2.31e-18 0 0 7.79 8.38 7.14
"145" "Hdgf" 293.79 289.42 319.15 370.76 637.22 849.46 2062.77 1526.45 2017.81 969.88 673.97 1.9952952377908 2.41e-27 2.66442192530206 2.47e-22 1.60750975441448 6.56e-07 1.08238787095768 0.0027026371605689 8.18 8.96 11 10.6 9.97
"146" "Ect2" 38.79 35.43 35.66 45.64 86.05 120.06 315.49 205.42 374.52 217.33 181.88 2.22489492853962 2.7e-27 3.26794263903459 7.2e-30 2.48278721228462 1.69e-14 2.22588678513876 3.66e-11 5.64 7.06 8.84 8.38 7.91
"147" "Rtkn2" 3.07 3.04 4.77 2.93 11.62 30.87 63.37 51.68 36.49 33.34 0.3 3.51193295612555 3.64e-27 3.40178783132643 7.74e-11 3.27154078472837 1.01e-09 -3.52460700864953 0.161085723274032 5 0 6.12 6.56 0
"148" "Stil" 18.59 22.42 18.09 25.29 51.13 75.95 183.79 110.99 155.02 125.1 90.49 2.3216203418288 8.45e-27 2.87731039920302 4.69e-19 2.56793783101733 3.86e-14 2.10068631619736 9.47e-09 0 7.6 8.46 8.77 7.64
"149" "Snora64" 2942.5 1735.44 480.46 606.1 14945.73 9116.32 486.97 706.33 5266.12 3000.42 5871 2.13132165318994 8.98e-27 1.86954491958159 3.68e-09 1.05796898676792 0.00242160511128312 2.026410779564 5.09e-11 6.42 8.14 9.82 9.97 9.12
"150" "Fancd2" 29.57 26.99 33.41 36.72 74.01 112.44 251.26 156.59 248.97 224.27 197.56 2.22988872797555 1.32e-26 2.97466926016888 1.16e-22 2.82393399488818 7.94e-20 2.64098822085599 1.03e-16 0 0 7.87 8.08 7
"151" "Pcdhgc3" 4.38 4.59 4.38 1.89 12.68 22.81 80.41 28.91 109.87 56.19 5.74 3.24822642467244 1.93e-26 4.84986270427952 3.61e-39 3.88245049747088 1.59e-19 0.591259739182366 0.424633771755318 0 7.25 9.08 8.29 5.8
"152" "Mybl2" 19.25 21.62 20.73 21.79 49.88 73.15 223.26 109.42 233.53 194.45 100.52 2.45016973569709 1.93e-26 3.48566160159918 4.4e-28 3.22145294137807 1.2e-22 2.26953628293716 3.86e-09 0 7.2 9.12 8.46 7.83
"153" "Cep55" 41.79 39.17 34.08 56.54 90.91 135.35 347.94 259.72 228.55 134.51 161.93 2.28102759225588 2.77e-26 2.41362842217915 3e-12 1.64883203560362 5.43e-05 1.9164888948799 3.63e-07 0 6.85 8.26 7.83 8
"154" "Cdc45" 53.55 54.62 42.47 61.22 125.83 175.75 401.99 322.41 308.33 364.43 210.78 2.27581947591657 4.56e-26 2.54136404118903 5.83e-14 2.78253050023756 9.06e-18 1.99262675546277 8.1e-08 0 6.11 7.99 7.97 7.01
"155" "Prc1" 77.83 78.54 61.64 90.97 150.88 217.09 507.12 408.32 361.2 322.09 255.73 2.05439676758813 9.56e-26 2.225284436031 1.81e-12 2.05995041295387 2.29e-10 1.72710795804468 4.28e-07 5.61 6.08 8 8.17 6.86
"156" "Gsto1" 76.99 125.51 66.09 98.49 316.51 352.11 567.95 545.52 355.18 193.29 402.16 2.27940378056327 9.91e-26 1.95245583384218 2.38e-07 1.07467248786323 0.0213629469751678 2.13167508141601 4.17e-09 6.54 8.01 9.33 8.72 9.05
"157" "Dyrk3" 14.57 6.92 11.63 12.41 61.76 71.61 136.39 109.85 120.46 40.21 284.64 3.05962863305361 1.12e-25 3.40366479956379 7.41e-15 1.82073687678116 0.00305412299262747 4.64424905124796 3.43e-39 7.1 8.23 9.5 9.7 9.7
"158" "Gm595" 0 0 0 0 6.03 21.02 41.89 29.05 4.55 3.66 0.55 NA 1.23e-25 NA 0.000351737289751819 NA 0.00120494251947438 NA 0.371754669951918 0 0 0 0 0
"159" "Aurka" 45.02 46.4 43.56 54.91 95.01 157.4 388.41 322.87 211.4 216.35 131.46 2.34340520245738 2.14e-25 2.15481144453639 2.28e-08 2.1882031885756 1.15e-08 1.46945995797772 0.000946985615663882 7 7.98 9.48 10 8.99
"160" "Cbx2" 15.5 12.45 16.46 21.81 54.26 71.57 140.76 116.1 80.28 127.73 52.25 2.53083728686019 2.71e-25 2.27777360596562 6.22e-08 2.94775849539616 9.37e-16 1.65816402645861 0.000513455289480366 0 6.52 7.52 8.01 7.12
"161" "Cit" 31.71 41.57 40.5 28.02 74.5 111.49 278.6 114.34 274.51 357.95 126.59 2.02953138600319 2.99e-25 2.95300117289213 6.49e-26 3.33590054711921 9.33e-36 1.83630591073366 2.79e-08 0 0 7.19 8.12 6.71
"162" "Cdca7l" 57.37 87.83 60.49 76.73 213.91 268.63 408.49 322.74 434.55 415.26 376.02 2.10358090399886 3.12e-25 2.62167992646851 9.75e-18 2.55617265171488 1.08e-16 2.41296714009901 1.75e-14 7.17 8.42 10.5 10.7 9.62
"163" "Hist1h1e" 1029.69 1079.34 647.84 911.21 1390.3 2623.72 4718.51 5432.03 4231.04 4077.76 1841.65 1.94918877809394 3.22e-25 2.20598722078114 1.13e-14 2.15275176269064 5.5e-14 1.00597380352959 0.00236782530792405 5.02 7.56 9.16 8.6 8.26
"164" "Fignl1" 58.49 73.49 56.11 70.04 140.16 193.98 421.21 335.5 465.84 452.73 163.69 2.07928300694523 3.66e-25 2.85173670195729 2.99e-22 2.81055308752315 1.52e-21 1.34286836676805 0.000435350203388545 6.34 8.03 9.43 9.76 8.7
"165" "Hist1h3f" 693.71 1212.25 157.46 388.86 1141.02 2232.35 2154.03 2798.67 4416.66 4980.83 2556.24 1.76351197316862 4.1e-25 2.84883206161684 4.73e-30 3.02226245686097 1.2e-34 2.0598995796779 7.92e-15 0 6.7 8.05 6.96 6.79
"166" "Gtse1" 15.98 17.55 17.7 21.49 44.33 60.99 179.45 156.78 173.64 135.5 97.16 2.60215270959989 4.18e-25 3.25567522305877 5.94e-19 2.89786874693449 9.35e-14 2.41801029044176 1.18e-08 0 0 7.02 8.85 0
"167" "Casc5" 117.19 106.72 80 95.23 206.21 303.71 626.94 322.96 725.67 713.71 532.1 1.87082372006938 4.44e-25 2.86241876221786 9.58e-28 2.83844312020279 2.28e-27 2.41480253707476 9.95e-19 0 6.52 8.62 9.05 8.13
"168" "Ccne2" 31.97 22.13 20.37 29.32 76.2 101.59 176.41 182.17 165.53 169.41 112.65 2.369561098305 7.54e-25 2.67342526001158 7.31e-14 2.70685158811417 2.18e-14 2.11817986453452 6.21e-08 7.51 8.72 10.3 10.3 9.39
"169" "Kif22" 66.72 54.4 69.17 91.91 127.1 192.03 623.49 331.47 333.57 319.71 189.36 2.17467729817875 9.39e-25 2.2412715562508 1.18e-10 2.18004588200365 6.61e-10 1.42441362324999 0.000565901361408986 0 0 6.64 7.41 5.86
"170" "Dhfr" 31.06 30.03 26.48 36.53 70.67 98.66 189.84 177.09 180.29 83.16 71.23 2.11142953029709 1.14e-24 2.53881626271904 1.2e-15 1.42245854784065 0.000360504887758873 1.19905377993197 0.00374625345066105 5.23 7.32 8.6 7.72 7.12
"171" "Hells" 153.65 118.69 105.81 109.52 252.52 368.42 788.85 418.9 683.35 400.36 355.83 1.906833399847 1.33e-24 2.48671946633271 1.37e-18 1.71539261677662 6.84e-08 1.545282924422 1.74e-06 5.01 7.05 8.39 8.53 7.4
"172" "Hist1h2be" 203.9 281.2 93.29 193.48 340.32 614.42 769.97 1020.4 558.61 733.66 320.8 1.8304341697141 1.58e-24 1.53348351420415 6.84e-07 1.92675374372406 3.42e-11 0.733316255631402 0.0350196066838317 5.02 7.56 9.16 8.6 8.26
"173" "Cenpv" 19.86 20.79 18.12 28.29 91.06 112.39 254.2 252.87 370.82 373.89 465.14 3.02879333435588 1.63e-24 4.09063713189299 3.14e-25 4.10253196039107 1.19e-25 4.4175830854051 1.66e-32 0 7.22 9.04 9.31 9.13
"174" "Hist1h4m" 1358.97 2078.7 151.57 491.51 2469.8 4738.85 3596.24 3530.2 5456.77 8684.35 4692.05 1.81264472804804 1.63e-24 2.41921290703211 1.73e-19 3.08958354205396 5.71e-35 2.20138405815366 5.63e-16 0 0 5.71 0 0
"175" "Hist3h2ba" 136.38 337.13 119.45 238.76 306.66 828.37 1085.59 1448.72 1118.23 1386.85 756.85 2.14135076109939 2.63e-24 2.42704712599089 2.49e-13 2.73764192657547 3.27e-18 1.86390947672453 2.52e-07 0 0 0 0 0
"176" "Mcm7" 200.15 276.17 199.61 274.51 384.18 664.71 1333.85 1089.01 944.06 864.71 589.98 1.86899560388912 2.78e-24 1.99028299904265 2.7e-11 1.86362081919685 1.04e-09 1.31207049437972 9.08e-05 6.64 8.42 9.63 9.72 8.4
"177" "Csda" 217.98 250.81 278.9 307.53 557.19 648.06 1411.22 1330.39 1221.29 1019.03 1298.41 1.90316153203506 3.01e-24 2.21086200055337 9.9e-14 1.94965271079843 3.66e-10 2.29920220235719 3.01e-15 0 0 0 0 0
"178" "Thop1" 37.85 65.61 52.12 56.92 130.84 160.15 349.12 300.83 383.88 255.7 270.71 2.14663988971384 4.44e-24 2.85319255703704 6.01e-20 2.26698931932922 4.34e-11 2.34928534029567 2.86e-12 6.7 7.58 8.53 8.33 8.15
"179" "Shmt1" 111.73 124.36 108.46 113.32 254.53 365.78 638.63 556.34 556.45 577.24 374.58 1.98718214886464 5.12e-24 2.28131401794562 2.19e-13 2.3342332336291 3.24e-14 1.71033583002598 4.82e-07 6.52 8.26 9.6 9.86 9.11
"180" "Hist2h3b" 728.9 2720.07 334.33 1110.72 1605.77 4385.01 4262.26 6470.56 13518.44 11560.52 5216.07 1.77279353981323 5.17e-24 3.46583677491482 3.63e-45 3.24011439040736 6.1e-39 2.09194323358481 2.87e-14 0 0 9.22 8.82 7.08
"181" "Rbm24" 0 0.74 0.55 1.1 5.39 20.6 33.22 26.89 0 0 0 5.17093071430346 5.96e-24 NA 0.985460070859393 NA 0.975340923314037 NA 0.979310681113102 0 0 0 0 0
"182" "Tacc3" 78.23 80.54 97.9 128.32 165.06 244.27 569.82 564.61 363.79 349.99 217.1 2.00355560422498 5.96e-24 1.91828491345365 1.81e-08 1.86249272888802 7.15e-08 1.17353875323065 0.00372250230004711 0 7.66 8.83 9.29 8.44
"183" "Pole" 68.79 90.81 75.72 72.24 147.58 226.17 497.42 242.77 450.06 620.2 297.76 1.85673173750629 6.08e-24 2.549249463495 2.24e-20 3.01186564148725 9.61e-31 1.95328207604642 4.59e-11 0 0 9.01 9.4 6.94
"184" "Diras2" 24.45 19.78 16.21 24.67 70.85 80.66 143.97 116.06 59.62 68.47 43.06 2.2736321050564 6.66e-24 1.48646772399565 0.000693520302232652 1.68614336109662 5.49e-05 1.01701966817172 0.0354630613855716 5.52 7.12 8.64 0 7.42
"185" "Depdc1b" 10.03 11.8 9.17 9.81 26.01 45.52 147.43 84.34 107.23 36.44 45.33 2.89375088225343 7.22e-24 3.39371397288803 1.05e-15 1.83660024854395 0.00166009674555845 2.15154345062788 5.25e-05 0 0 6.39 6.31 0
"186" "Dctpp1" 135.92 200.64 100.4 167.17 344.77 555.78 970.35 976.89 884.72 1237.67 845.66 2.2369118288006 7.49e-24 2.5503619071134 1.84e-13 3.03469576490534 2.43e-21 2.48521871031457 9.26e-13 0 7.62 9.36 9.75 8.62
"187" "Foxm1" 27.95 33.66 31.68 27.01 54.66 96.51 263.32 116.39 205.52 185.53 119.57 2.14174914889242 8.31e-24 2.77264215283738 1.97e-18 2.62501584541999 4.64e-16 1.99121882160117 2.79e-08 0 6.87 8.1 8.5 7.08
"188" "Hist1h4h" 2044.46 3138.39 546.94 1429.77 3342.73 6238.37 6549.34 7639.67 7968.52 10388.67 5532.74 1.7312057469579 8.4e-24 2.15444086859054 6.02e-16 2.53706813370676 5.8e-23 1.6281232012907 4.31e-09 0 8.18 9.27 8.69 8.51
"189" "Alcam" 107.67 85.74 109.58 133.17 30.41 18.2 9.96 13.25 9.48 15.23 13.21 -2.60239990914055 9.68e-24 -3.52382659790695 3.27e-09 -2.83986962031792 5.45e-07 -3.04515509555838 8.34e-08 5.59 5.92 0 0 6.93
"190" "Gfod1" 32.13 40.93 26.15 28.51 66.21 91.06 211.32 133.36 175.05 125.05 97.96 1.97455920427363 1.03e-23 2.45478260374577 5e-16 1.96952059949824 1.71e-09 1.61728022099388 2.43e-06 6.26 8.51 10.1 9.21 10.1
"191" "Cdca2" 39.3 42.28 39.95 45.45 96.36 114.5 291.45 204.87 322.62 357.1 185.49 2.08240215944997 1.08e-23 2.95016056294386 6.56e-23 3.09665281942066 3.35e-26 2.15166609692881 2.16e-10 6.35 9.04 10.2 10.5 9.27
"192" "Hist1h2bp" 67.11 116.62 21.03 62.68 152.35 317.91 503.89 621.5 412.06 484.39 224.58 2.57685707119233 1.87e-23 2.62363916326294 2.88e-10 2.85695382152224 7.53e-13 1.74801419400371 0.000285960987516376 0 7.44 8.94 7.8 7.95
"193" "Pask" 16.05 17.27 16.04 16.62 45.89 69.52 124.36 84.16 91.86 97.66 68.12 2.29558140304596 2.07e-23 2.47740800565601 1.16e-11 2.56573900007253 8.85e-13 2.04604965711361 2.13e-07 0 5.54 8.5 9.51 7.93
"194" "Ckap2" 30.19 33.06 20.58 27.95 66.77 102.92 208.24 180.74 214.17 206.72 157.47 2.32133427103008 2.48e-23 2.9380943276948 1.63e-17 2.88701589503113 8.32e-17 2.49441492326914 1.31e-11 0 6.57 7.99 8.49 7.43
"195" "Sgol1" 23.43 18.2 15.58 25.79 48.63 69.86 170.29 127.63 175.73 182.54 106.03 2.32682147350408 3.02e-23 3.08217726256088 9.38e-20 3.13702939490493 7.32e-21 2.3532892753647 6.92e-10 8.05 8.98 8.86 9.34 8.21
"196" "Spc24" 38.5 60.21 23.15 37.45 105.71 190.74 293.39 275.67 236.86 219.88 225.54 2.44171365973459 3.37e-23 2.57219775371249 4.99e-11 2.46487955580711 6.15e-10 2.50154649253352 1.87e-10 0 0 7.91 8.05 6.77
"197" "Sorcs2" 24.07 26.72 20.59 26.96 60.08 85.96 153.1 120.18 30.98 50.1 46.84 2.09220138272662 4.2e-23 0.333558788968953 0.55893372067244 1.02703224826196 0.022391459629313 0.9299627206806 0.0393944310313699 0 0 7.19 8.26 5.83
"198" "Arvcf" 15.94 19.64 14.67 15.34 27.89 53.2 142.33 97.75 36.78 168.97 18.23 2.29178935903732 5.73e-23 1.16544560469515 0.0191518475325842 3.36521934389528 8.08e-26 0.152838686322343 0.803180531428925 0 0 7.9 8.43 7.2
"199" "Bag2" 9.32 11.85 4.92 10.26 34.75 50.88 132.68 99.27 140.17 291.96 144.42 3.12709279054907 6.6e-23 3.94715033913164 1.82e-19 5.00574345685263 7.67e-42 3.9902432783887 2.63e-20 0 7.17 8.78 9.77 9.53
"200" "Hist1h2an" 221.31 595.67 43.14 203 502.4 1834.87 1036.08 1222.04 3316.57 3827.42 1238.68 2.11188285415272 6.68e-23 3.64138752521333 3.12e-38 3.84806777239385 1.07e-44 2.22049907975333 4.16e-11 0 7.44 8.94 7.8 7.95
"201" "Hist3h2bb-ps" 296.15 367.31 103.62 272.6 428.54 1010.78 1274.28 1663.59 1506.53 1751.18 1160.13 2.07386545428089 9.64e-23 2.53508984816038 5.24e-15 2.75218782899968 1.35e-18 2.15814692374191 2.45e-10 0 7.95 9.4 9.11 9.03
"202" "Snora52" 2855.21 1942.39 874.26 850.61 15059.37 8080.38 1181.7 1943.2 5736.43 4757.85 8817.86 2.00963205089927 1.02e-22 1.81473476840667 4.83e-08 1.54489138545248 7.61e-06 2.43501016825221 6.37e-16 6.23 8.62 10.2 10.3 9.74
"203" "Incenp" 115.65 99.87 127.59 98.92 202.31 257.7 770.53 378.8 635.29 328.4 312.83 1.8642529598423 1.28e-22 2.52327102330998 1.72e-18 1.57130984034407 3.88e-06 1.50123458513151 9.6e-06 0 0 8.1 7.33 6.17
"204" "Cenpn" 23.91 24.32 21.2 31.08 68.25 99.77 238.9 180.84 175.27 152.69 83.4 2.54788813372752 1.33e-22 2.80224003306084 5.9e-12 2.6032665339863 7.32e-10 1.73078024277441 0.000621340827331193 0 0 8.57 8.74 7.64
"205" "Rad54b" 11.78 14.97 16.16 17.9 45.2 73.34 135.16 108.26 141.9 193.4 105.53 2.57344978004516 1.58e-22 3.22249409475986 3.11e-17 3.66920730017615 2.46e-25 2.79527269101156 8.92e-12 0 6.05 7.51 8.31 6.5
"206" "Mir1949" 2536.75 1962.21 356.91 658.49 13267.34 7766.86 1834.05 1538.62 10627.79 5919.58 20729.24 2.14602193147116 1.98e-22 2.9465762656903 1.1e-21 2.1023013633967 1.07e-09 3.91040186304421 1.87e-46 5.65 8.92 10.7 9.92 10.2
"207" "E2f7" 4.19 6.33 6.35 8.26 17.03 29.75 79.91 36.37 72.66 34.69 29.06 2.69792034379852 2.25e-22 3.53175069453483 6.81e-20 2.46510916940573 2.11e-07 2.20962403175219 7.81e-06 0 0 8.08 7.79 6.29
"208" "Prr11" 13.57 14.67 11.89 17.84 39.89 58.56 142.13 72.57 101.14 78.09 65.74 2.43347548821762 2.7e-22 2.80297529285277 2.58e-13 2.42983132685076 3.4e-09 2.1814649708058 3.4e-07 0 0 7.8 8.77 7.24
"209" "Tuba1b" 371.98 569.67 310.76 607.78 674.74 1262.07 2179.3 2251.14 1615.64 1422.42 1120 1.77522042459183 2.92e-22 1.7966557839453 3.48e-09 1.61289752862023 3.06e-07 1.26804874640206 0.000136323516461425 6.68 8.49 10.2 10.2 9.66
"210" "Mex3a" 9.62 5.79 8.03 7.06 21.05 34.85 78.78 41.75 49.06 23.08 18.44 2.53221474854548 3.72e-22 2.68573799121999 9.44e-11 1.59783398130787 0.0024731917931407 1.27402941309173 0.0223191566570664 0 8.27 10.1 9.32 8.04
"211" "Dlgap5" 36.26 37.25 26.79 33.42 61.27 90.31 234.6 157.8 167.8 186.66 144.33 2.02433835017378 3.89e-22 2.32752745570978 2.51e-12 2.48119754063814 1.49e-14 2.11015594518598 6.81e-10 0 0 7.37 6.85 6.48
"212" "Sox4" 49.09 67.14 50.46 48.93 66.55 154.6 384.85 252.79 175.17 55.68 13.08 1.99381438954249 5.08e-22 1.70026471437195 3.54e-06 0.0467401137070357 0.957659910954919 -2.04305655664361 0.00404045367902343 0 9.28 10.2 9.68 9.06
"213" "Nlgn2" 2.66 0.96 2.32 1.42 10.78 13.07 38.27 23.16 21.45 95.72 52.64 3.53442976670216 5.34e-22 3.5431999763299 6.76e-10 5.70104272548149 2.27e-46 4.83838181767823 1.77e-26 7.27 8.03 8.27 9.99 9.18
"214" "Hist1h3e" 1904.54 3835.99 544.92 1367.38 3431.72 7313.4 5517.28 7770.94 11189.09 12047.06 7043.97 1.65097190184167 5.41e-22 2.5480274507221 2.89e-23 2.6546158527671 9.39e-26 1.88039541281559 2.82e-12 0 7.35 9.02 8.18 8.31
"215" "Asf1b" 73.28 67.97 59.15 77.61 119.48 181.69 486.02 416 326.51 286.93 124.41 2.11365579896117 5.91e-22 2.23199040025268 4.99e-10 2.04556203962243 3.99e-08 0.839965675557168 0.0888495192661053 0 0 8.11 8.11 6.68
"216" "Trip13" 28.77 26.87 28.34 34.02 65.32 101.15 247.97 178.98 279.23 151.42 128.01 2.33026669111812 6.05e-22 3.2426670910082 1.69e-21 2.35976891373639 3.71e-09 2.1174696567857 3.24e-07 0 5.63 8.86 8.5 7.88
"217" "Mcm5" 241.81 258.98 228.94 279.76 434.61 584.27 1326.2 1089.31 879.82 731.74 596.73 1.7664272577585 6.2e-22 1.80165368255076 2.85e-09 1.53577641051536 1.52e-06 1.24152359445502 0.000198640246496847 0 0 8.06 8.33 7.37
"218" "Trim2" 2.31 2.49 2.79 2.16 12.23 20.01 38.54 20.24 50.7 70.46 11.79 3.22270946233122 8.59e-22 4.37851162325373 3.53e-24 4.85333035085799 3.48e-34 2.27408959434279 0.000308895777821459 0 7.33 8.59 9.25 7.33
"219" "Rad51ap1" 38.18 29.29 24.8 35.26 71.73 92.73 267.44 218.16 252.32 230.66 158.79 2.34973621903412 1.16e-21 2.98441790043018 2.1e-16 2.85493117533894 1.27e-14 2.3162833949957 1.4e-08 0 7.87 9.39 9.64 8.63
"220" "Pa2g4" 449.51 470 459.35 524.13 973.1 1254.71 2276.81 2032.7 1681.2 926.37 1273.65 1.78043133799489 1.25e-21 1.82122338117205 2.02e-09 0.961392457853835 0.00944857135986256 1.42070089791934 1.05e-05 5.83 9.46 10.7 10.4 10.2
"221" "Rad54l" 40.46 41.56 35.11 39.78 90.67 124.84 264.09 181.08 210.96 227.24 149.94 2.07401437299446 1.5e-21 2.42703217696845 1e-12 2.53427950874558 2.5e-14 1.93444800791175 1.38e-07 0 0 6.73 0 0
"222" "Myb" 184.86 172.03 157.81 150.2 198.21 376.89 876.32 755.75 724.02 456.19 222.76 1.73098846994071 1.5e-21 2.12289217253447 1.5e-13 1.45649744444683 6.03e-06 0.422352820069836 0.314962447591481 0 8.61 9.73 9.2 9.92
"223" "Steap3" 10.04 9.16 5.42 7.37 24.25 43.45 112.93 40.5 179.24 216.29 55.74 2.7892018666888 1.79e-21 4.48619973403683 1.49e-36 4.75727406739195 3.15e-44 2.80109200998814 1.8e-09 0 7.76 9.28 10.2 7.62
"224" "Eya1" 37.38 36.41 27.61 27.23 3.38 3.12 0.88 1.88 2.51 3.34 2.43 -3.79607115375835 1.98e-21 -3.67939598306781 1.18e-05 -3.26723524454453 5.33e-05 -3.7261270334128 6.71e-06 0 0 0 5.88 0
"225" "Psat1" 138.44 156.52 126.15 146.56 298.83 356.25 748.6 615.02 847.25 387.18 599.12 1.83030212121698 1.98e-21 2.57773523105975 3.39e-19 1.44795193066641 3.86e-05 2.07779249412745 1.55e-11 0 7.93 9.32 9.08 9.14
"226" "Gmnn" 76.66 66.02 92.24 86.19 166.54 250.63 604.93 502.66 451.69 231.96 201.22 2.2474426784686 2.01e-21 2.49226538005339 3.32e-11 1.53080844924494 0.00110474761241832 1.32570611292801 0.00667543476929981 0 6.06 8.11 7.33 7.36
"227" "Nme4" 22.4 11.07 12.41 19.52 59.32 115.42 208.62 207.22 107.58 32.18 242.72 3.17476995957529 2.38e-21 2.71804735320409 3.32e-06 0.976873690338002 0.267195461617675 3.89193044986159 5.72e-17 0 7.41 8.18 7.79 8.52
"228" "Rcc1" 100.71 112.92 103.91 105.52 214.87 279.57 657.48 398.8 559.09 419.64 257.47 1.87400402347415 2.64e-21 2.4022182544267 2.87e-15 1.98828991544168 1.09e-09 1.28354205510059 0.000570677872272619 7.18 8.07 10.4 10.3 9.58
"229" "Hist1h2ac" 109.02 186.85 47.24 72.89 207.16 454.06 356.22 414.36 598.28 744.17 355.33 1.78317455133027 3.07e-21 2.52423730734405 2.41e-19 2.83904870337169 6.53e-26 1.77257597010886 7.92e-09 5.42 7.75 8.91 7.94 7.64
"230" "Smc2" 142.11 142.09 116.21 162.76 272.29 354.3 747.82 503.1 520.28 462.45 370.35 1.73717820290841 3.3e-21 1.88571776614585 2.94e-10 1.71572690634016 2.68e-08 1.39531885337577 1.55e-05 0 7.17 7.97 8.64 7.66
"231" "Nespas" 18.81 27.63 20.24 11.44 67.91 109.85 167.95 86.78 241.36 273.28 3.12 2.46890292091561 3.8e-21 3.62742274725991 2.24e-25 3.8066160257337 1.87e-29 -2.64607401502454 0.0296810966667582 0 0 0 0 0
"232" "Tpi1" 284.45 360.33 226.27 313.38 583.51 861.28 1261.68 1246.87 1118.38 1191.4 1279.11 1.73887909933046 5.61e-21 1.91721752873487 1.98e-10 2.00846492660122 1.36e-11 2.11094739983273 3.83e-13 5.92 6.9 8.34 8.9 7.91
"233" "Ccnd1" 36.91 62.61 43.72 63.98 122.57 138.58 324 202.54 526.64 565.41 543.48 1.92646470773761 5.71e-21 3.34565385028692 1.14e-33 3.44813414672215 1.01e-36 3.3910636926397 3.05e-35 5.96 10.3 12 12.1 11.7
"234" "Tnfrsf19" 14.06 14.68 9.04 8.98 19.11 42.94 95.96 76.08 70.44 3.83 3.03 2.32371647085365 6.11e-21 2.59111997929955 2.84e-11 -1.6098586326067 0.170449328123645 -1.94788523105871 0.0805062001969345 6.2 6.93 8.77 6.07 7.42
"235" "Bard1" 40.13 39.46 31.77 34.33 75.67 120.36 229.1 117.75 239.91 231.24 120.28 1.89773147934814 6.69e-21 2.71959143791521 3.63e-20 2.66648912165404 2.66e-19 1.72349491721116 5.45e-07 5.57 8.67 9.53 10 7.91
"236" "Gm11275" 8.99 29.64 216.98 343.13 43.1 113.28 993.41 2057.36 65.82 132.32 95.82 2.42129027027713 7.43e-21 -1.1853317239572 0.159316954199114 -0.177898515910273 0.810513141738598 -0.643530936949159 0.404708928444141 0 0 0 0 0
"237" "Hspd1" 294.74 297.57 252.15 332.98 562.49 876.5 1371.76 1090.43 1090.45 1458.67 1108.48 1.72825702084079 7.77e-21 1.88927007529187 3.14e-10 2.3089999893987 2.65e-16 1.91292919544797 1.12e-10 7.78 9.52 10.8 11.6 10.4
"238" "Gins1" 41.12 39.56 35.3 38.33 115.21 144.13 292.13 306.6 317.24 259.59 130.26 2.47526378708277 8.74e-21 3.03974313009512 1.02e-14 2.75040325026419 2.89e-11 1.7555625735533 0.000430633136054887 0 7.56 8.6 8.14 7.4
"239" "Rrm1" 239.66 256.69 209.4 284.76 420.11 557.59 1307.61 977.18 1060.34 661.77 576.76 1.71973003414715 8.83e-21 2.09828349635422 4.13e-13 1.41815835111866 1.33e-05 1.21979957254752 0.000251584985432606 0 7.39 8.35 9.03 7.6
"240" "Hist2h2ac" 1458.86 2474.53 544.52 1377.36 2282.88 4810.01 5154.04 6125.96 11278.36 12929.32 4857.83 1.64977097249553 9.25e-21 2.94574969558516 7.03e-31 3.14283879719225 3.65e-36 1.7305763054181 1.63e-09 4.34 8.2 10.4 10.2 9.33
"241" "Rrp1b" 69.33 60.35 84.42 75.57 203.76 210.58 334.89 273.83 423.73 369.15 312.2 1.8204085750271 9.57e-21 2.54873499683358 1.59e-18 2.3497968805101 3.45e-15 2.10806025930869 8.78e-12 7.59 8.94 10.7 10.9 10.1
"242" "Shank2" 2.09 0.94 0.7 0.28 6.47 10.44 24.49 11.4 3.22 43.85 0 3.7188637877909 1.01e-20 1.6834584516597 0.04712609972208 5.45090270087718 9.81e-33 NA 0.29201594383295 0 0 0 0 0
"243" "Mcm2" 215.01 255.11 179.2 219.3 389.93 557.71 1169.13 699.89 956.44 713.15 482.17 1.69718834962593 1.13e-20 2.13894929608253 5.86e-14 1.71548038575983 1.62e-08 1.15081671982641 0.000534635351600311 0 6.26 8.05 8.43 7.43
"244" "Ldha" 583.37 636 559.64 695.08 1116.44 1562.05 3125.67 2398.07 3131.89 3464.26 1663.8 1.72911821686438 1.23e-20 2.34013556017036 1.2e-16 2.48564922922283 3.3e-19 1.42758404000846 8.18e-06 7.83 9.35 11.1 11.4 10.5
"245" "Hist4h4" 1808.09 2844.33 574.83 1352.36 3140.71 5141.23 5790.02 6374.33 10426.61 15097.03 9132.8 1.63576511118139 1.38e-20 2.66419619391046 1.24e-24 3.19819078250961 5.83e-38 2.47305516778053 6.67e-21 0 8.54 9.67 9.75 9.23
"246" "Hist3h2a" 464.37 722.64 188.77 338.53 655.48 1435.38 1443.37 1705.71 2417.55 2123.57 2111.65 1.61192227556075 1.74e-20 2.49591771126877 1.26e-21 2.30886364884498 2.43e-18 2.30074271520027 3.11e-18 0 7.95 9.4 9.11 9.03
"247" "Ptpn14" 70.05 61.48 56.64 28.96 19.65 15.16 2.9 3.34 3.48 4.55 5.88 -2.40310494412116 1.79e-20 -3.96332795493759 3.21e-10 -3.57654871570026 5.65e-09 -3.20659910594996 6.7e-08 0 0 0 0 0
"248" "Galnt14" 4.41 4.36 8.32 7.9 35.57 40.38 67.13 72.49 194.52 155.81 0.95 3.1087336115221 1.83e-20 4.96049569015199 1.33e-37 4.64036502305895 2.21e-30 -2.71727957775576 0.167830827788191 0 6.04 9.41 9.7 0
"249" "Ercc6l" 34.82 43.25 34.01 44.13 68.37 101.83 248.64 177.49 161.42 229.43 130.18 1.93262410471753 2.56e-20 2.04733252759797 3.36e-09 2.55456723625223 5.77e-16 1.73702100677749 1.76e-06 0 6.66 7.18 7.73 6.97
"250" "Mcm6" 396.83 469.36 403.54 515.17 764.1 1040.78 2233.17 1861.46 1481.73 1799.06 1154.47 1.72475188371424 2.96e-20 1.73143933578177 2.11e-08 2.0114000536144 1.15e-11 1.3713874350588 2.59e-05 5.8 7.44 9.75 10.1 8.74
"251" "Shmt2" 245.83 299.12 243.81 292.36 523.2 658.03 1265.11 1071.33 1326.85 846.83 898.69 1.70209348156538 3.12e-20 2.29547861833376 6.66e-16 1.64761761927439 1.81e-07 1.73336878866642 1.6e-08 6.39 8.91 10.5 10.5 10.1
"252" "Sfxn1" 181.41 195.95 188.3 211.04 474.61 483.7 838.34 744.4 688.69 323.79 536.79 1.70999539237232 6.68e-20 1.82649726282726 3.72e-09 0.737700963865397 0.0752726142640564 1.46700032948952 7.69e-06 7.35 9.09 10.6 10.1 10.3
"253" "Ppa1" 129.96 184.89 144.34 195.53 411.76 460.96 769.07 739.25 653.27 488.39 725.49 1.8626419018881 6.69e-20 1.99680133844108 2.72e-09 1.57715561061652 1.92e-05 2.14807767843131 3.31e-11 7.03 7.89 9.14 8.48 8.81
"254" "Dab2ip" 17.98 26.75 30.8 25.84 62.27 67.33 140.79 113.59 201.27 101.07 4.85 1.92140041228736 1.89e-19 2.98950139318829 1.69e-23 1.99572407795796 2.24e-08 -2.38550219881047 0.0005354451693372 0 0 6.05 0 6.5
"255" "Mcm3" 332.76 341.43 282.9 391.3 537.49 786.26 1722.8 1215.58 1214.94 1214.07 664.57 1.66033676461028 2.36e-19 1.84964723478784 7.04e-10 1.84861377281013 7.6e-10 0.979255240429589 0.00568167155015224 0 6.89 8.04 8.53 6.86
"256" "Rad51" 26.56 22.35 30.05 36.07 78.24 114.53 292.07 74.14 223.89 219.79 112.2 2.28078649783253 2.41e-19 2.96077992464097 7.64e-16 2.93411558076051 1.6e-15 1.96406250863027 9.79e-06 0 0 8.17 7.98 7.8
"257" "Iqgap3" 8.09 9.26 9.75 7.34 22.22 27.24 79.77 44.39 96.44 63.02 67.21 2.33377609946757 3e-19 3.48554650820568 3.24e-23 2.8717246116207 1.49e-13 2.96459076105918 7.15e-15 0 0 8.25 7.26 6.24
"258" "Ankle1" 12.45 18.47 18.82 23.26 39.41 60.29 162.68 140.62 309.63 285.28 291.73 2.46481146964795 3e-19 4.0845768916355 7.92e-33 3.96641023897025 3.07e-30 3.99866538403433 4.52e-31 0 6.26 9.65 9.74 9.29
"259" "Antxr2" 146.85 138.83 143.68 157.39 39.48 33.19 21.06 25.64 102.86 71.38 122.6 -2.297305631883 3.67e-19 -0.512063877945438 0.469860484776881 -1.03915413024887 0.0705072963640761 -0.258786957719751 0.825870148677521 0 0 7.93 8.41 8.19
"260" "Pde2a" 230.48 217.8 225.11 297.49 399.23 557.13 1246.38 892.95 1890.26 586.09 75.25 1.6728961125407 3.94e-19 2.96121979097074 2.53e-28 1.27182923126027 0.000230605932989367 -1.68952950371261 0.000839741685010769 0 8.04 10.8 10.6 8.41
"261" "Tcf19" 46.33 61.3 56.87 66.49 106.72 140.45 335.49 358.75 292.43 241.23 181.5 2.0269927819822 5.12e-19 2.34026092706589 1.15e-10 2.06257893980275 7.93e-08 1.65213915226233 6.45e-05 0 6.61 7.88 8.59 7.54
"262" "Siglech" 24.69 14.95 99.39 143.85 7.63 9.96 6.02 15.83 11.57 23.17 2654.79 -2.84245872301352 5.94e-19 -2.61172941028394 6.23e-05 -1.60986023052661 0.00625260402986853 5.23033566008953 7.9e-99 0 0 0 0 10.7
"263" "Gas2l3" 12.17 8.67 11.9 10.64 22.89 29.98 84.77 54.41 57.36 32.6 36.94 2.14638000574615 7.8e-19 2.40301497102963 5.8e-10 1.58784191144617 0.000578239670308918 1.76815381331016 4.6e-05 0 0 7.44 6.89 6.79
"264" "Npm1" 1664.68 1711.42 1503.2 1839.03 3691.2 5121.86 7071.71 6520.94 6587.07 6000.17 5818.46 1.73769187717384 7.8e-19 1.97153421999711 1.04e-10 1.83690071494663 3.4e-09 1.79253469701542 6.67e-09 7.23 10 11.2 11.6 10.5
"265" "BC048355" 1.09 3.24 3.23 4.81 18.18 31.9 123.63 54.51 149.36 35.16 80.41 4.20550782194235 1.15e-18 5.59387642724983 6.02e-23 3.50708957016703 2.23e-05 4.70052942961336 8.36e-13 0 0 0 0 0
"266" "Spc25" 42.76 45.3 41.74 61.07 93.6 125.92 315.49 297.59 226.36 162.92 147.94 2.12503319356961 1.21e-18 2.2460286776248 1.7e-08 1.77157335454545 6.09e-05 1.63242181598971 0.00028015282051911 0 0 6.84 6.84 6.31
"267" "Hist1h2ad" 150.61 510.58 61.3 144.35 402.38 1222.37 664.95 1156.55 1699.7 2074.84 1119.58 1.99118972954477 1.36e-18 2.97144249796302 1.32e-20 3.25916245552476 1.65e-26 2.36911998748699 7.37e-12 0 0 0 0 0
"268" "Asns" 15.67 16.12 14.35 25.3 50.28 67.3 167.54 117.06 359.78 218.49 377.72 2.49303735410669 1.68e-18 4.33231100451181 3.07e-37 3.61276326541014 1.46e-21 4.40251318988465 1.27e-39 0 6.67 9.19 9.31 9
"269" "9430020K01Rik" 5.2 3.55 3.98 4.08 13.99 21.43 45.6 19.72 13.97 20.14 12.52 2.58324500642202 1.88e-18 1.7330122961733 0.00276592794194187 2.26074395877062 1.21e-05 1.57491483769645 0.00796072400000724 0 5.57 5.49 7.59 6.98
"270" "Brca1" 56.15 60.19 39.59 52.13 91.99 127.67 276.19 164.66 230.16 278.56 177.96 1.66658077338964 2.03e-18 2.14563749580427 6.54e-13 2.42098847771609 2.53e-17 1.77455337324077 1.5e-08 0 0 8 8.95 7.72
"271" "Gpr174" 452.03 347.48 361.64 417.61 189.97 112.1 31.49 73.31 14.81 76.11 23.58 -1.9561520578841 2.67e-18 -4.73607642134272 2e-14 -2.37456204184647 1.11e-05 -4.0650843436518 4.48e-12 0 0 0 0 0
"272" "Snora33" 1518.6 1205.76 297.43 287.03 7730.57 4258.93 680.08 593.52 2675.61 1862.1 4725.37 2.00302930147307 2.88e-18 1.69355103131934 6.59e-06 1.17061374066171 0.00361221165677691 2.5141104867645 3.14e-14 5.95 9.46 10.3 10.1 10.1
"273" "Sertad4" 1.44 1.07 0.53 0.79 4.37 15.19 37.01 13.56 2.52 8.96 0.7 4.19461543074807 3.56e-18 1.39607934157496 0.198769953541455 3.22615434013265 0.000169980648265488 -0.451917564979991 1 0 6.18 0 8.22 0
"274" "Slc29a1" 90.57 119.21 106.53 136.73 187.71 237.34 623.26 486.85 777.92 567.66 498.48 1.76067868634409 3.94e-18 2.77998336354115 1.49e-21 2.32538865116159 1.08e-13 2.13789718707822 2.85e-11 5.87 7.7 9.6 9.69 8.91
"275" "Fam72a" 5.16 6.24 8.05 9.26 23.02 45.84 91.67 65.65 80.76 124.02 50.59 2.97784612878722 4.12e-18 3.49208758012429 2.83e-12 4.11094755893942 2.21e-20 2.81729890860009 6.08e-07 5.5 8.57 9.93 10.1 9.47
"276" "Prkar2b" 19.43 21.7 15.41 22.44 60.16 80.34 114.7 94 39.14 62.53 166.92 2.14449428605645 5.81e-18 0.987156388166456 0.0723025866554139 1.66306114945079 0.000275138477316798 3.07959755280305 5.27e-19 0 6.97 8.11 9.01 8.46
"277" "Kifc1" 22.37 17.49 21.52 21 44.48 69.26 175.36 112.61 233.67 164.1 149.17 2.28578834435593 6.15e-18 3.50410649257754 3.24e-23 2.99420920753282 6.27e-15 2.85659138897205 3.18e-13 0 0 0 0 0
"278" "Hist1h2ao" 35.25 218.43 19.1 58.63 140.49 603.56 313.33 536.37 978.2 747.81 573.72 2.26573630161166 8.17e-18 3.56151232942851 9.68e-25 3.17405462834518 4.08e-18 2.79172967627221 6e-13 0 0 0 0 0
"279" "Nr1d1" 8.28 14.55 13.25 9.45 46.28 49.76 91.38 73.23 94.55 89.65 59.24 2.51722449546418 8.59e-18 3.05425999881792 1.81e-12 2.97748612373654 1.15e-11 2.37975418126965 1.04e-06 5.43 9.51 11.4 11.8 10.8
"280" "Lrrn4" 1.74 2.41 1.54 4.34 12.1 15.82 40.22 32.75 58.64 98.46 3.03 3.33038967363556 1.15e-17 4.54756349752163 2.29e-20 5.29521613362269 1.87e-34 0.27306809286077 0.818264889590851 0 7.72 9.61 10.4 6.05
"281" "Fcer2a" 2584.67 1918.7 2483.34 2005.82 890.84 643.55 251.53 458.84 86.62 121.95 40.73 -2.00216586082984 1.47e-17 -4.69788308471617 2.17e-12 -4.20436540410019 9.69e-11 -5.78649144278032 3.97e-16 0 0 0 0 0
"282" "Mpp3" 0 0 0 0 3.53 8.02 23.75 8.8 139.76 176.37 14.39 NA 1.89e-17 NA 3.1e-63 NA 1.38e-74 NA 3.68e-12 0 0 8.11 9.18 5.86
"283" "Gm6682" 200.58 350.4 142.18 321.44 383.88 742.44 871.66 1148.98 760.44 740.33 783.33 1.63304777553689 1.92e-17 1.5839952608965 1.82e-06 1.5453293308671 4.1e-06 1.62678105134653 5.5e-07 0 0 0 0 0
"284" "2610002D18Rik" 13.32 2.82 10.54 8.38 37.43 58.82 140.57 68.8 138.61 128.59 68.18 3.12384105628886 2.27e-17 3.98313344306144 1.46e-15 3.87488055240942 2.24e-14 2.95952260338041 7.53e-07 0 0 0 0 0
"285" "Snora21" 3189.81 1819.58 599.5 367.03 10776.24 7319.65 563.81 698.55 3815.06 3263.31 6061.26 1.69571579789336 2.43e-17 1.35254491190039 3.45e-05 1.12717520876909 0.000693784136759262 2.02045689400231 1.22e-11 4.85 8.64 10.4 10.6 9.72
"286" "Dkc1" 307.27 272.71 256.89 305.49 677.33 744.76 1081.09 893.43 814.3 925.03 761.9 1.5720782078922 3e-17 1.51161493837404 2.07e-06 1.69555469102925 3.8e-08 1.41565619128603 9.62e-06 5.89 9.71 10.2 11.1 9.99
"287" "Hist1h4i" 386.91 633.89 162.84 303.73 585.56 1356.36 1291.57 1507.39 1955.69 2401.81 1337.99 1.67239129774271 3.53e-17 2.39491412554413 1.09e-15 2.69135844963282 4.93e-21 1.84730375482672 7.38e-09 0 8.29 9.69 8.4 7.92
"288" "Cdc25c" 9.96 11.08 12.41 18.72 27.79 45.44 138.16 102.25 126.1 128.2 66.92 2.58781722646464 3.69e-17 3.27327593718784 1.63e-13 3.29710392347836 7.23e-14 2.35921701201061 7.52e-06 0 0 6.45 6.9 5.63
"289" "Stat4" 382.53 324.14 321.77 354.45 140.13 106.85 35.68 72.49 44.9 152.42 38.08 -1.96118601351251 3.8e-17 -2.94482714875443 9.82e-08 -1.18156227836654 0.0312131748189613 -3.182509115075 9.17e-09 0 0 0 0 0
"290" "Diap3" 38.48 37.71 35.78 29.75 81.89 85.87 218.22 126.77 223.59 299.85 134.79 1.85521221613626 4.64e-17 2.65781229492429 2.14e-16 3.08119760223483 2.45e-24 1.92767009712628 1.18e-07 0 0 6.96 7.96 6.1
"291" "Pcna" 531.13 742.23 405.07 643.01 983.73 1445.17 2047.48 2252.56 1676.56 1500.61 1130.26 1.53535926365878 4.88e-17 1.53048412114613 9.54e-07 1.3705290839899 2.18e-05 0.961634688537167 0.00535024619818708 5.16 7.9 8.74 8.95 7.99
"292" "Prim1" 119.77 118.43 115.25 133.57 223.01 325.55 588.21 512.57 567.09 415.23 321.37 1.75983590654835 4.91e-17 2.21959669686037 1.36e-11 1.76992966155385 8.42e-07 1.40025423987317 0.000250736738373534 0 0 7.21 6.7 6.41
"293" "F630043A04Rik" 14.97 19.03 20.93 19.22 44.49 66.57 142.19 113.6 123.24 123.38 49.19 2.30667168736725 5.21e-17 2.73295198969736 8.54e-11 2.73458995358853 8.01e-11 1.40791836238134 0.0115657137449015 0 0 0 0 0
"294" "Icosl" 1199.18 1129.63 1510.51 1254.15 550.52 384.74 131.59 330.31 169.8 140.28 177.57 -1.86615160328761 5.51e-17 -2.90674048407497 2.94e-07 -3.18226760726255 3.3e-08 -2.8421890803495 3.32e-07 0 0 7.57 0 7.29
"295" "4930547N16Rik" 17.98 16.79 17.22 31.52 47.62 66.35 134.64 102.13 132.61 82.06 88.06 2.07038110133653 5.94e-17 2.66716870167573 5.18e-13 1.9747301891397 4.07e-06 2.07653787918406 5.34e-07 0 0 0 0 0
"296" "Fbxo5" 109.63 133.52 113.08 125.09 184.13 269.29 573.85 540.93 342.97 274.81 233.78 1.70404128784408 6.68e-17 1.5110860156536 3.9e-05 1.19143813103412 0.00263931257976767 0.958155139855057 0.0211774904792269 5.86 8.56 9.25 9 8.5
"297" "Tipin" 204.49 199.23 164.31 193.97 384.96 445.52 841.22 777.51 859.26 729.29 419.38 1.68445357583577 7.06e-17 2.17330373894759 6.35e-12 1.93670161431885 4.26e-09 1.13846706402869 0.00305057734852627 0 6.85 9.06 8.86 7.77
"298" "Bcl6" 194.53 149.07 215.67 191.32 62.33 42.32 26.83 48.25 11.01 14.2 20.66 -2.06219383020258 7.88e-17 -4.0911386955245 2.78e-11 -3.72406223469683 3.95e-10 -3.18311291022381 2.03e-08 0 0 6.62 6.1 0
"299" "Kif18a" 65.28 61.35 41.59 59.48 105.58 144.79 262.77 233.91 258.48 237.82 187.97 1.71407051424145 8.21e-17 2.18291836424138 1.34e-11 2.06273575534796 3.77e-10 1.72336813476426 5.93e-07 0 6.64 7.88 8.01 7.14
"300" "Melk" 19.9 15.58 14.39 17.95 32.94 58.04 119.14 99.96 89.38 84.63 114.85 2.19285778638965 8.61e-17 2.39824126036958 1.41e-08 2.3194583822813 8.87e-08 2.75996816723986 1.94e-12 0 5.93 6.71 7.41 6.96
"301" "Srm" 77.32 109.73 96.08 101.46 220.26 217.98 631.53 321.35 568.37 481.01 429.13 1.85485371845355 9.1e-17 2.5635091568941 9.86e-15 2.32274563672483 2.05e-11 2.15809351119557 1.1e-09 8.21 8.8 10.6 11.1 10.7
"302" "Mmrn1" 0 0 0.19 0.96 0 0 30.97 5.99 0 0 0 5.00625899047168 1.34e-16 NA 1 NA 1 NA 1 0 0 0 0 0
"303" "Fam64a" 5.77 17.11 14.61 12.09 30.55 50.25 160.64 89.18 112.68 62.14 43.9 2.73734382283004 1.43e-16 3.18440129228821 1.33e-10 2.32576397003512 8.22e-05 1.824462668336 0.0062449085605669 0 0 7.21 7.87 6.4
"304" "Kpna2" 84.17 101.97 80.12 156.58 190.62 296.3 459.23 454.36 457.33 524.93 352.55 1.72776851968695 1.5e-16 2.11312370050703 2.15e-10 2.31201319075328 5.54e-13 1.73771602073235 9.85e-07 5.78 6.85 9.06 9.6 8.12
"305" "BC030867" 6.65 5.17 5.96 5.58 15.82 23.26 80.96 47.95 79.66 98.29 38.19 2.84626317641276 1.65e-16 3.76981520548417 1.13e-15 4.07300437038169 4.93e-20 2.7091546457425 1.81e-06 0 6.52 7.61 8.07 6.67
"306" "Lyar" 111.37 118.59 106.43 116.02 207.45 275.61 664.16 367.73 509.2 555.1 246.72 1.74356745531605 1.72e-16 2.17060160045318 6.63e-11 2.2951168743134 1.69e-12 1.12524385157949 0.00604876955931571 7.12 7.67 9.47 9.98 8.95
"307" "Nolc1" 163.46 158.33 170.31 183.57 292.38 346.14 857.03 486.24 631.39 388.64 407.77 1.55241339026167 1.98e-16 1.90221261098066 4.18e-10 1.20211559474252 0.000723053188958772 1.27143683856311 0.000198375225176736 7.66 9.54 11 10.7 10.3
"308" "Lgals1" 252.16 286.65 134.96 309.14 378.2 595.3 1049.29 1141.39 691.8 1437.24 5195.68 1.68670044483446 2.18e-16 1.49329569124265 4.62e-05 2.54816976525053 4.4e-17 4.4021813508898 2.78e-71 0 6.07 7.97 8.5 8.36
"309" "Padi3" 4.72 2.34 1.45 2.6 23.54 20.63 26.99 32.01 5.5 9.05 12.59 3.21509279985886 2.18e-16 0.98564470702293 0.328270377784877 1.70413088058148 0.0323560560902577 2.18041946632992 0.00265788527381903 0 0 0 0 0
"310" "Dctd" 17.89 15.48 12.55 8.2 53.13 53.01 87.75 71.73 135.71 117.63 131.27 2.29513003484248 2.31e-16 3.32629328744876 3.36e-18 3.12002230326121 2.65e-15 3.27830350084804 1.22e-17 6.4 8.04 10.2 10.5 9.91
"311" "D2Ertd750e" 45.72 47.5 46.36 49.47 84.43 118.46 252.41 197.04 261.8 184.91 212.42 1.78685624467567 2.33e-16 2.46969724795801 5.11e-14 1.96805539899887 4.09e-08 2.16815175741218 2.2e-10 0 0 0 0 0
"312" "Gpam" 91.83 91.73 94.64 87.3 133.24 211.14 435.99 321 203.16 215.62 130.84 1.59135590556087 2.99e-16 1.15274497288964 0.00200903131756636 1.23861959641453 0.000712201341656889 0.517932258355616 0.259465755913782 6.53 7.83 8.69 8.55 8.13
"313" "Nudcd2" 81.39 90.16 91.29 120 197.87 271.85 466.79 392.15 470.11 444.23 348.21 1.79515849173285 3.01e-16 2.29625679553369 1.19e-11 2.21456525131845 1.43e-10 1.86321606155496 3.54e-07 6.56 7.83 9.73 10 9.09
"314" "Ipo5" 259.06 254.06 244.2 263.24 472.27 546.68 1226.58 690.51 807.77 870.25 637.97 1.52451062058151 3.48e-16 1.66265546877522 7.51e-08 1.77014081135008 5.84e-09 1.32219948647147 4.68e-05 5.95 6.86 8.54 9.17 7.91
"315" "Bzw2" 242.11 296.84 243.22 336.38 534.97 659.91 1080.02 1007.56 911.24 993.35 969.43 1.55314768321086 3.51e-16 1.70427323506305 8.84e-08 1.8287442886979 4.47e-09 1.79357888661916 7.32e-09 6.61 8.95 10.3 10.9 10.2
"316" "Cd200" 245.51 165.9 190.85 191.86 77.89 53.05 16.83 35.5 12.33 21.3 10.97 -2.11538638419418 4.33e-16 -4.00911232559274 3.97e-10 -3.22043169488238 1.01e-07 -4.17772159959239 8.33e-11 0 0 0 0 0
"317" "Pus7" 84.69 86.63 94.11 98.58 214.92 265.58 350.1 297.24 363.29 457.59 393.25 1.63151242615624 5.38e-16 1.997143570002 4.61e-10 2.33007743998652 1.28e-14 2.11146868128226 1.24e-11 7.21 8.51 9.51 9.98 9.15
"318" "Snora70" 2884.16 2027.68 560.27 590.95 11443.82 6522.94 329.78 593.37 2177.82 2351 4998.29 1.63949782357442 5.46e-16 0.522838618722898 0.127449916079434 0.633228439581299 0.065385035991769 1.72138850938281 3.19e-08 0 8.41 9.45 9.85 8.98
"319" "Zwilch" 28.2 33.03 33.65 34.71 82.41 96.15 177.09 139.9 213.52 213.88 148.38 1.93507623492295 6.04e-16 2.72041681572671 4.77e-15 2.72284718698337 3.77e-15 2.19534225069584 7.37e-09 6.34 9.41 10.4 10.6 10
"320" "Ran" 345.29 557.52 247.64 461.81 673.58 1054.34 1448.61 1313.91 1384.92 1956.24 1236.69 1.47777239787655 6.55e-16 1.78071822345123 1.77e-09 2.27899895937659 1.87e-16 1.61739948867839 6.83e-08 8.42 9.7 10.8 11.5 10.4
"321" "H2-Q6" 958.01 1571.82 1388.9 828.59 508.76 388.16 145.58 256.18 560.47 294.43 484.3 -1.87006731131261 6.78e-16 -1.08240424221242 0.0568916685716969 -2.01111671722123 0.000177478485508454 -1.29314039194757 0.0158038543462833 0 5.4 7.79 0 6.99
"322" "Ptk2" 48.71 45.73 48.72 51.21 144.96 133.51 186.56 160.21 300.75 281.13 149.79 1.68560451469116 7.93e-16 2.62975917376189 1.99e-18 2.53243185145142 9.55e-17 1.62413574886233 5.18e-06 6.63 7.86 8.85 8.82 7.61
"323" "Dna2" 25.5 26.66 25.54 35.05 52.78 69.47 172.5 108.95 267.07 86.78 84.6 1.84015615333777 9.55e-16 3.24409049351443 1.86e-26 1.62230705778664 9.21e-05 1.58560213497721 0.00010170695580845 0 6.19 8.35 7.3 7.03
"324" "E130303B06Rik" 8.51 8.42 8.38 10.41 22.91 40.62 127.31 90.71 72.7 91.34 54.98 2.97858716531817 1e-15 3.02522328368573 3.48e-07 3.35451470925713 1.58e-09 2.62217482639173 3.4e-05 0 0 0 0 0
"325" "Camkv" 0 0 0.29 0 1.51 4.79 23.56 9.61 12.73 197.19 3.47 7.08855980876553 1.12e-15 7.45603570877379 2.07e-10 11.409317775305 5.4e-82 5.58081085745069 0.000695015934531644 0 5.21 7.64 10.2 6.79
"326" "Nhp2" 250.26 262.91 239.96 309.89 530.79 559.08 1081.99 1092.31 828.65 1155.17 698.16 1.61854745526678 1.12e-15 1.64066603853219 2.52e-06 2.11993644028777 2.41e-11 1.39346086693202 0.0001225280529519 6.43 9.65 10.7 10.8 9.89
"327" "Tfrc" 278.03 224.1 234.24 282.67 494.81 585.5 1000.83 817.85 1131.64 1346.93 4368.6 1.50833967467448 1.12e-15 2.15120439539915 1.1e-13 2.40246419364612 1.24e-17 4.09996033285428 1.42e-54 8.08 9.27 10.6 11 10.1
"328" "Smtnl2" 1.84 1.82 0.68 0 2.79 9.89 29.53 28.65 0 2.12 7.58 4.02920451767383 1.26e-15 NA 0.867146409984482 0.96636922211872 0.318557247264719 2.80450280572661 0.00218730425688003 5.58 6.1 6.3 7.63 7.52
"329" "Ctps" 116.11 119.22 121.72 135.01 253.44 300.72 505.51 414.19 476.5 464.49 365.12 1.58269334288948 1.49e-15 1.95364197087816 8.25e-10 1.91681329391986 2.27e-09 1.56953645348218 3.64e-06 8.12 8.71 10.4 10.6 10
"330" "Atad5" 63.12 61.92 63.56 66.55 117.91 151.38 308.17 162.08 315.86 305.99 178.14 1.53528253973437 1.53e-15 2.30793960636109 1.64e-15 2.26213886352832 7.9e-15 1.48166585743591 7.38e-06 0 0 7.16 7.72 6
"331" "Ezh2" 269.04 271.39 198.4 215.04 321.49 556.71 1240.47 514.83 732.85 654.38 469.92 1.46511689520826 1.67e-15 1.61972527806742 1.27e-07 1.45633599628817 4.14e-06 0.978622511604431 0.00409653264568389 5.88 7.84 9.45 9.46 8.74
"332" "Slc35f2" 19.29 18.14 12.86 15.53 56.24 73.94 90.52 80.72 138.51 166.55 120.3 2.19517721510049 1.95e-15 3.07339220664617 1.89e-15 3.33935742243736 1.24e-19 2.87003871093909 5.43e-13 0 7.68 9.66 9.99 9.12
"333" "Ahcy" 66.56 110.93 76.9 154.54 169.08 271.95 400.61 430.26 442.25 297.73 301.18 1.63705943561642 2.12e-15 2.11300823690252 7.39e-11 1.5421506923535 2.87e-05 1.55877206433254 1.49e-05 5.73 7.79 9.32 9.31 8.35
"334" "E2f2" 235.07 233.43 208.85 230.87 402.45 517.68 912.79 691.96 382.49 519.58 130.41 1.47510111055944 2.13e-15 0.752380222956481 0.0491724189715507 1.19430409189174 0.000410127328562939 -0.799987305388559 0.17171252727629 0 6.31 8.89 9.37 6.97
"335" "5730408K05Rik" 1292.91 945.56 627.39 510.15 4856.09 2815.46 1135.54 1023.13 2289.03 1197.7 3397.84 1.54190452697013 2.33e-15 1.43941719353703 8.17e-06 0.504947409573015 0.171098067703939 2.00929874200716 7.46e-12 0 8.16 9.86 9.23 9.1
"336" "Tifa" 299.03 261.01 211.27 270.45 315.25 519.99 1008.15 1038.1 568.74 350.38 186.73 1.46779206422732 2.48e-15 1.1268182302832 0.00120484091841818 0.427969383355747 0.325591954720822 -0.479997314378312 0.548506100572889 0 7.13 9.12 8.75 8.12
"337" "Pola1" 153.85 135.59 127.99 127.48 238.65 323.47 596.42 349.4 563.97 574.88 436.39 1.46848915369434 2.53e-15 2.04960045448697 1.38e-12 2.07724287345454 5.12e-13 1.67960007527813 2.89e-08 0 6.84 8.3 8.98 7.54
"338" "Gnl3" 375.73 333.47 367.05 415.45 884.01 880.05 1340.3 1117.1 1530.86 1481.22 1195.67 1.50078462377851 2.55e-15 2.03738493142924 5.91e-12 1.98982851428408 2.62e-11 1.68086184628797 6.66e-08 8.27 10.4 11.4 11.9 11.1
"339" "1300014I06Rik" 480.09 534.67 700.67 672.87 256.35 179.02 75.48 194.31 418.66 35.01 16.25 -1.75996152268789 2.83e-15 -0.512133077840136 0.382103795945886 -4.09207319632295 1.75e-12 -5.19940053994828 1.63e-16 0 0 0 0 0
"340" "Snord22" 63696.7 33348.1 3774.49 5431.1 195803.5 85985.58 4756.96 5682.48 66287.32 28160.77 86529.71 1.4596288478456 2.84e-15 1.31933669413556 1.26e-06 0.0842905504609797 0.321819917285776 1.70379933588427 2.79e-10 0 8.06 9.54 9.01 8.87
"341" "Polq" 30.93 30.87 31.61 26.64 59.64 74.98 152.08 77.23 166.51 142.37 105.5 1.60002557882115 3.18e-15 2.47197341947706 1.21e-16 2.2460097721535 3.37e-13 1.81360759536413 3.79e-08 0 0 6.83 7.45 6.6
"342" "Ppil5" 3.22 6.37 5.35 2.95 23.75 27.65 74.4 53.7 55.43 56.99 36.64 3.32675855154587 3.3e-15 3.63151362023507 6.35e-09 3.67155540528968 3.21e-09 3.03426611604504 1.03e-05 0 0 0 0 0
"343" "Cdk4" 494.5 551.94 538.95 601.27 945.33 1177.85 2012.61 1975.78 1610.65 807.19 1398.85 1.48281412564228 3.41e-15 1.55891410965991 1.25e-06 0.562251290958673 0.205832632751978 1.35551235359653 4.24e-05 5.54 7.67 9.23 8.89 8.58
"344" "Dbf4" 92.43 97.25 87.99 111.71 167.93 234.77 401.28 389.69 380.87 456.82 296.86 1.61615335777137 3.46e-15 1.96811987177129 2.81e-09 2.23044703080331 1.61e-12 1.60860392862742 4.7e-06 7.01 7.58 9.2 9.44 8.31
"345" "Paics" 432.62 439.8 390.82 563.75 848 1067.65 1562.12 1633.23 1167.73 1054.88 1289.24 1.48413685391891 3.47e-15 1.35423799853636 4.96e-05 1.20761015416582 0.000503749080608003 1.49705211788611 2.63e-06 8.24 9.4 10.9 11.3 10.1
"346" "Tiam1" 7.46 5.57 5.75 5.59 13.04 14.66 57.42 22.49 16.87 23.16 18.62 2.14263399495534 4.36e-15 1.46935372256423 0.00635899864087345 1.9265290022659 6.65e-05 1.61174682183545 0.00138306749351428 0 7.03 7.52 8.15 8.25
"347" "Troap" 5.33 3.69 8.66 7.04 16.94 30.22 77.11 51.42 93.12 86.28 63 2.82928142938305 4.6e-15 3.91341231500391 1.68e-16 3.80334743325608 3.47e-15 3.34967308537027 1.63e-10 0 5.87 7.16 7.42 7.55
"348" "Zfp704" 2.88 2.76 3.48 2.37 5.81 8.99 31.99 6.56 182.64 3.29 14.45 2.21510947306567 4.69e-15 5.99055206157859 1.75e-107 0.195780691089128 0.789796148897923 2.33069069474193 2.98e-07 0 0 9.28 0 5.76
"349" "Snora34" 1382 799.63 113.43 195.31 5631.71 3183.02 212.45 189.44 1379.46 1431.01 1626.38 1.88787766708377 4.71e-15 1.14774352094155 0.00556438274363813 1.2006736510168 0.00329853366885704 1.38530427648516 0.000414352940768112 0 0 0 0 0
"350" "Slc7a5" 68.43 77.18 90.42 70.15 161.32 160.96 410.43 193.79 712.19 401.93 697.19 1.59741092869629 4.75e-15 3.21788213112185 1.71e-32 2.39256421641903 2.86e-15 3.18717182905899 5.4e-32 5.82 9.26 10.8 10.8 10.8
"351" "Gpsm2" 15.93 17.81 13.56 24.65 27.78 40.16 122.62 98.27 77.78 68.16 10.74 2.0051540068069 5.06e-15 2.11240454780655 7.79e-07 1.92193064859818 1.74e-05 -0.744000693642247 0.537481423904935 0 0 7.16 7.12 0
"352" "Slc19a1" 49.39 43.24 75.62 50.21 131.2 133.45 285.68 205.41 461.65 208.65 333.92 1.79052083753004 5.08e-15 3.07943034003084 2.04e-23 1.93371577398509 4.25e-07 2.61213335899416 2.91e-15 6.98 9.73 11.1 10.6 10.8
"353" "St8sia6" 134.3 116.9 108.25 119.61 56.17 29.58 11.79 14.59 14.9 26.04 75.25 -2.09503404007336 5.09e-15 -3.00682212221045 1.16e-06 -2.20140500439434 0.000215154385176538 -0.670442871025549 0.349433721877305 5.63 5.95 0 0 6.87
"354" "Nsl1" 23.57 29.73 28.51 37.27 50.42 81.32 177.59 133.06 173.99 193.19 131.86 1.89338764786806 5.58e-15 2.54707326349466 2.01e-12 2.69808929189612 1.61e-14 2.14707585978381 3.08e-08 6.21 6.64 7.84 8.4 7.16
"355" "Thoc4" 364.95 429.43 317.66 494.11 578.98 847.83 1522.02 1577.37 1216.4 1271.86 737.06 1.49469370071381 5.89e-15 1.59901108756092 1.07e-06 1.66333324077288 2.82e-07 0.876247337159912 0.0235060237760975 0 0 0 0 0
"356" "Adk" 108.72 104.68 97.63 105.33 247.34 277.7 419.6 376.15 400.73 429.99 468.77 1.66549772276129 7.07e-15 1.94479904427006 1.89e-08 2.04647163381657 1.71e-09 2.17104876961058 4.04e-11 6.83 8.75 9.9 10.5 9.64
"357" "Trim37" 74.44 79.97 73.68 91.15 140.25 184.44 359.12 223.39 316.26 309.74 194.51 1.50677921119432 7.62e-15 1.98646966881541 8.55e-11 1.95641627641712 2.18e-10 1.28520289877114 0.000222621581671728 6.68 7.64 8.87 9.61 8.56
"358" "Dusp4" 88.1 117.62 106.25 98.25 28.25 23.09 16.28 14.79 94.89 7.32 11.57 -2.3155065149106 8.63e-15 -0.11206986946906 1 -3.80841037242357 6.53e-08 -3.14793706160012 2.08e-06 0 6.67 10.5 7.27 7.44
"359" "Otub2" 92.12 85.55 68.59 71.15 119.09 203.41 303.26 300.73 221.12 453.08 42.27 1.54542782372933 9.92e-15 1.47848193985177 2.28e-05 2.51341822737111 7.7e-18 -0.908641563505696 0.20647060416954 0 6.29 7.9 10.2 6.57
"360" "Rcor2" 9.6 8.3 10.19 10.12 15.43 40.7 96.56 75.34 21.55 77.22 10.46 2.5772014773892 1.01e-14 1.17373761161895 0.127485390198144 3.01502429658435 1.86e-09 0.13093259388943 0.909597919600581 0 6.12 8.22 8.7 7.8
"361" "Pafah1b3" 359.62 420.1 292.3 422.83 536.9 813.35 1514.97 1412.38 426.86 699.75 443.87 1.51680085669887 1.02e-14 0.191834157480245 0.725865564460438 0.904910761760532 0.0240319451202018 0.248208383976073 0.623204667369291 0 7.87 8.94 9.2 8.54
"362" "Ska1" 4.98 6.71 3.01 9.3 12.67 24.88 67.74 47.97 56.92 54.94 41.65 2.67487489986835 1.25e-14 3.2459012560306 1.67e-10 3.19482250457998 4.56e-10 2.79528208975703 3.32e-07 0 0 6.24 6.65 5.49
"363" "Eme1" 29.28 26.27 23.63 33.82 52.1 83.82 172.19 136.81 175.34 227.87 92.96 1.97722317921621 1.56e-14 2.63383238043786 5.53e-12 3.01188822787257 2.93e-17 1.71835920121462 0.000160023147259865 0 0 6.85 7.64 0
"364" "Gsn" 324.7 305.85 383.34 392.79 138.19 105.64 63.57 106.85 148.8 154.23 116.43 -1.76372057042164 1.56e-14 -1.24084774142242 0.0175359333105653 -1.18913884994633 0.0225221567604314 -1.59475942891121 0.00158817157691072 5.68 7.09 9.43 9.1 9.92
"365" "Fkbp4" 538.49 529.12 464.88 538.32 813.69 1083.04 2057.44 1616.4 1362.65 1415.94 1283.6 1.42762976652418 1.7e-14 1.39621985981576 1.51e-05 1.45156494283651 5.76e-06 1.31000050458894 4.97e-05 6.68 8.13 9.96 9.82 9.14
"366" "Ranbp1" 472.13 521.49 348.74 517.08 818.6 913.34 1842.1 1583.74 1485.95 1198.27 854.3 1.47188204157527 1.78e-14 1.67651737602261 1.79e-07 1.36608482365456 6.82e-05 0.877946491363768 0.0203291244657537 8.2 8.88 10.7 10.8 10.1
"367" "Tnik" 38.2 34.41 47.66 40.49 12.08 7.73 4.91 10.47 7.12 30.29 9.7 -2.19167106330908 1.86e-14 -2.49688743109235 5.81e-05 -0.407994999263373 0.61266790091228 -2.05077992498426 0.000578728352409562 0 0 0 0 0
"368" "Pgap1" 948.37 593.24 856.85 835.79 414.54 292.73 109.02 199.6 52.5 103.7 48.5 -1.67068700373563 1.94e-14 -3.94496996708776 1.76e-11 -2.96294340082802 8.2e-08 -4.05930264256676 4.73e-12 0 0 6.63 7.09 6.32
"369" "Slc43a3" 85.78 80.67 92.64 92.37 131.24 180.6 439.5 305.1 297.36 168.93 498.61 1.58777842318518 2.27e-14 1.75885008917922 4.67e-07 0.943065052590653 0.0309676790926103 2.50455131332476 1.57e-16 0 0 7.84 0 8.53
"370" "Hirip3" 90.92 87.05 80.66 67.07 122.68 190.49 463.48 201.51 327.01 323.85 162.64 1.58652674986772 2.3e-14 2.00579103442935 1.13e-09 1.99178202434776 1.7e-09 0.998138400561467 0.0124725424702326 0 8.35 10 10.2 9.46
"371" "Ypel2" 50.52 37.28 37.86 28.57 120.65 129.75 122.27 100.05 60.51 51.9 73.76 1.6159024861027 2.33e-14 0.650162071862634 0.146397466603338 0.42872302577376 0.379513081306925 0.935827142957855 0.0204749807829977 0 6.18 7.72 8.07 7.78
"372" "Rasgrp3" 811.35 654.55 840.94 726.96 382.26 251.23 97.5 201.84 10.32 54.65 15.02 -1.70143988884266 2.54e-14 -6.19953919961539 1.07e-18 -3.79476067447937 3.18e-10 -5.65809735752437 5.43e-17 5.74 8.09 0 7.54 0
"373" "Fcamr" 153.6 97.5 229.26 115.04 49.75 45.06 19.48 25.17 1.89 10.46 5.51 -2.0940078348386 2.75e-14 -6.29932917690433 2.91e-13 -3.83090446487846 1.51e-08 -4.75566309255424 7.62e-11 0 0 0 0 5.5
"374" "Bhlhe40" 150.95 112.03 127.26 134.4 48.74 39 18.55 24.81 19.75 16.42 85.71 -2.00066012128394 2.86e-14 -2.73140324844123 4.78e-06 -2.99780177461526 7.34e-07 -0.613792364735533 0.375825474618829 0 6.28 5.93 7.08 8.28
"375" "Fhod3" 1.79 0.44 1.81 2.13 5.91 9.97 27.67 10.52 1.34 33.68 1.3 3.13148596193258 3.26e-14 -0.203037488691645 1 4.44854974391698 1.95e-18 -0.246758866120963 1 0 5.09 0 8.18 0
"376" "Ccdc34" 27.89 26.43 19.74 25.58 44.85 70.87 180.14 106.54 111.35 95.65 54.6 2.01383337845205 3.71e-14 2.16030463143432 7.53e-07 1.94103994699264 2.13e-05 1.13217592956638 0.0354630613855716 0 5.52 7.72 7.9 0
"377" "Eif5a" 851.85 1068.75 918.22 1000.52 1635.87 2088.76 4051.2 2589.99 3399.45 3472.66 2256.18 1.43290401545921 3.92e-14 1.82444302392138 1.73e-09 1.85518284032034 8.08e-10 1.23302384536723 0.000209112903979635 7.44 9.71 11.2 11.9 10.8
"378" "Carns1" 227.1 190.54 302.22 176.48 102.28 71.65 50.93 45.07 101.49 41.72 10.91 -1.7314607529488 3.99e-14 -1.14270849671755 0.0331402093929725 -2.42523501671293 5.64e-06 -4.36032307290909 4.72e-13 6.23 7.77 9.29 8.18 8.24
"379" "Ppat" 150.09 140.06 125.78 172.29 278.24 347.41 498.67 472.88 441.93 561.28 413.13 1.44111723400528 4e-14 1.58746203244164 7.93e-07 1.9323648149296 1.58e-10 1.49023998930591 4.03e-06 8.24 9.4 10.9 11.3 10.1
"380" "Impa2" 40.96 59.46 34.12 51.8 92.33 152.71 288.85 178.39 290.56 193.17 259.2 1.93450708322526 4.04e-14 2.64089870932142 2.03e-12 2.05193365738982 1.2e-06 2.47612831980249 1.2e-10 5.74 8.18 9.64 9.61 9.32
"381" "Nme1" 543.83 564.8 499.97 596.45 1080.62 1274.47 1780.14 1787.52 1500.59 2020.33 1042.28 1.42545582149927 4.08e-14 1.4447184796142 9.72e-06 1.87377959194599 5.09e-10 0.918931528325928 0.011851739486978 7.77 9.22 10.4 10.9 9.69
"382" "Satb1" 470.05 365.47 514.75 466.54 228.85 146.93 76.24 126.12 23.63 164.7 34.59 -1.65191675476246 4.25e-14 -4.26464411245633 1.97e-12 -1.46349509181646 0.00602224377429163 -3.71490872805725 1.43e-10 0 5.79 0 6.72 0
"383" "Cbx5" 236.79 208.37 227.13 227.23 393.59 488.82 1119.87 496.89 690.64 610.99 467.19 1.47422177666284 4.34e-14 1.61877853477318 4.34e-07 1.44199340898976 1.4e-05 1.0548540354538 0.00284541873584802 7.13 10.6 11.4 11.6 10.8
"384" "A330023F24Rik" 51.16 44.14 72.83 54.77 19.36 15.18 6.14 11.87 25.3 27.37 13.97 -2.08463394729757 4.85e-14 -1.13918732656544 0.063194517747785 -1.02572927678216 0.0929478300464238 -1.99599269073765 0.000681050294366441 5.35 5.96 7.07 7.06 6.16
"385" "Inadl" 82.19 68.18 97.11 65.16 33.54 22.87 17.26 13.45 6.44 27.68 7.21 -1.84342651325148 5.07e-14 -3.60129787385377 1.97e-09 -1.49758652433166 0.00637737598171894 -3.43835930272756 4.48e-09 0 6.75 6.52 7.73 7.03
"386" "Ptma" 1993.36 2789.58 1806.27 3445.3 3672.46 7027.02 9161.24 9652.69 6914.83 7797.83 4757.37 1.55640045091001 5.95e-14 1.46279551901257 2.49e-05 1.63617443860461 1.26e-06 0.923265969550495 0.0169839825791397 7.66 10.4 11.6 11.9 11.4
"387" "Nasp" 212.48 209.7 172.27 200.72 280.71 445.34 809.62 570.3 622.21 420.33 352.16 1.40514965164952 6.5e-14 1.64613825344069 1.22e-07 1.08025910066271 0.00215559182964209 0.824967722098425 0.0248604571802049 6.09 8.41 9.44 9.92 8.88
"388" "Bcl7a" 222 238.94 206.38 185.24 325.41 457.35 819.3 617.27 513.13 668.18 102.92 1.3802509285656 8.4e-14 1.26752300553403 0.000114644674585656 1.64843543127526 6.96e-08 -1.05027800703332 0.0654156451278747 6.68 7.75 9.52 10.1 9.38
"389" "Mthfd2" 73.53 89.43 70.69 107.48 155.88 189.97 379.83 321.02 390.27 268.34 387.81 1.61745446277429 8.47e-14 2.19415093179507 4.97e-11 1.65374048993674 1.05e-05 2.18502836952409 5e-11 6.01 7.61 9.41 9.64 8.38
"390" "Lgr5" 10 8.87 6.06 6.77 18.05 26.43 54.18 39.69 36.09 7.07 1.49 2.12576789847055 8.94e-14 2.18711630287046 3.38e-06 -0.16470072021737 1 -2.41109860456461 0.0655434023546504 0 0 6.7 0 0
"391" "Chaf1b" 50.52 49.32 48.98 46.8 87.44 106.3 286.71 189.79 255.9 157.37 92.98 1.77662391173771 9.28e-14 2.387526269798 4.32e-11 1.68610666341626 5.83e-05 0.926938453390155 0.0617488511057877 5.39 7.28 8.53 8.58 7.59
"392" "Cacybp" 375.09 346.92 302.98 429.73 718.12 810.1 1227.76 1160.82 1104.02 1472 1067.42 1.42893396876217 9.69e-14 1.60202481327804 6.99e-07 2.01703617701389 1.66e-11 1.55338645375214 1.37e-06 6.39 9.36 10.2 10.8 9.89
"393" "C1qbp" 247.82 211.2 237.43 166.63 437.04 525.46 1145.04 372.12 1062.92 983.13 876.9 1.52257612223492 1.1e-13 2.3004668214457 5.24e-14 2.18788790693267 1.91e-12 2.02291803899612 1.75e-10 7.54 8.33 9.99 10.5 10.4
"394" "H2afz" 261.29 376.91 194.87 367.72 407.85 869.51 1005.74 1091.46 2134.31 1376.74 919.53 1.49071553764309 1.1e-13 2.82978586949997 3.67e-24 2.19727226188789 6.01e-13 1.61498468139486 1.4e-06 5.93 7.22 9.74 8.67 7.57
"395" "Setd8" 114.71 116.91 121.56 142.13 222.01 258.44 490.81 418.11 382.25 445.1 264.13 1.4880271978658 1.16e-13 1.62618475320658 1.79e-06 1.84579775241068 1.51e-08 1.09291642436066 0.00430823922909079 6.47 7.69 9 9.74 8.37
"396" "Camk2a" 9.02 10.36 5.76 6.62 42.05 34.75 36.48 24.74 6.81 9.19 32.11 2.11959452049803 1.22e-13 -0.221484209130887 1 0.210925854146077 0.699121694055397 2.01581175258281 1.81e-05 0 6.44 6.19 10.1 7.43
"397" "Galk1" 146.79 192.72 118.5 173.05 304.7 376.17 550.33 574.38 874.29 1123.45 717.97 1.51661325774764 1.3e-13 2.47033471729989 1.81e-16 2.8320868321247 1.83e-23 2.18614638258691 2.19e-12 6.3 8.59 9.92 10.6 9.77
"398" "Atic" 314.6 314.26 370.1 413.85 628.06 740.72 1283.08 1124.39 830.77 952.64 739.05 1.41838681928897 1.32e-13 1.23395356529889 0.000456434279908801 1.43143557213698 2.1e-05 1.06517641781965 0.00331940145952156 8.62 9.43 10.7 11.1 9.91
"399" "Hist2h2aa1" 188.09 595.13 80.27 222.37 357.41 1118.34 849.04 854.34 2144.48 2827.25 821.97 1.54979390355391 1.37e-13 2.9817897527051 1.82e-25 3.38056135096503 1.6e-35 1.59831953658778 3.15e-06 0 7.13 9.09 8.03 7.8
"400" "Ppil1" 212.76 235.93 243.08 251.7 428.83 482.49 902.22 851.88 895.13 682.09 428.59 1.49831433209033 1.85e-13 1.92412057618892 3.77e-09 1.53198546722446 1.68e-05 0.861621544541426 0.0402023371340952 0 6.69 9.97 9.51 8.52
"401" "Gpnmb" 0.32 56.92 1.17 0.93 1.44 0.82 0.4 0 53.33 25.74 38.51 -4.47950677597908 1.89e-13 1.84594240120273 3.77e-06 0.795007126740435 0.0648770546654737 1.37622819631672 0.000860436854867192 0 0 0 0 0
"402" "Arl5c" 409.36 416.24 319.53 471.32 638.87 886.01 1213.71 1478 565.41 870.37 865.09 1.38324786528922 2.26e-13 0.484540421677722 0.275990102454758 1.10687185286207 0.00181542149593195 1.0980932543128 0.00157505941909473 0 9.71 11.2 11 11
"403" "Hmcn1" 0.46 0.59 0.58 0.73 0.55 0.91 6.47 8.69 1.65 1.21 2.11 2.8160616174085 2.28e-13 1.48367916488397 0.0749649710272255 1.03622018791275 0.266890496588931 1.83845613934534 0.0173271294912873 0 0 0 0 0
"404" "Mif" 165.71 329.86 154.62 220.81 292.05 599.31 943.41 906.03 1105.63 657.72 644.24 1.65385243259777 2.33e-13 2.34412404330582 5.78e-12 1.59480082169621 5.5e-05 1.56492551968314 5.46e-05 5.26 7.33 9.56 8.98 9.24
"405" "Cenph" 24.37 27.96 38.17 28.62 66.4 76.2 228.08 157.45 165.44 69.04 89.72 2.14847743583615 2.35e-13 2.47389243173284 8.5e-08 1.21308871059686 0.0551687044876984 1.59108586650417 0.00508014228007063 0 0 7.3 5.94 0
"406" "Snora5c" 2906.32 1643.76 636.08 465.15 9285.69 6410.26 481.37 818.22 2805.45 6038.53 4877.76 1.58849896657531 2.44e-13 0.989646870943486 0.00725633939664924 2.09561205759823 4.79e-11 1.78763344535259 4.99e-08 0 0 0 6.72 0
"407" "Phgdh" 144.62 180.66 125.42 164.4 273.59 389.85 506.31 533.65 853.88 528.44 631.69 1.46952437384194 2.92e-13 2.4732123590456 3.26e-17 1.78091869885196 6.15e-08 2.03839575780189 5.63e-11 0 9.38 11.2 10.7 10.6
"408" "Arhgap19" 57.11 58.56 64.92 66.22 110.79 116.67 281.84 175.41 160.22 97.04 86.51 1.47209223340358 3.55e-13 1.37665339890305 0.000159738939982854 0.653250606229044 0.162586456607243 0.487537964433802 0.331623408156671 0 6.53 7.19 7.24 6.55
"409" "Prodh" 13.23 14.65 13.29 14.75 52.85 60.9 75.53 69.43 92.42 34.06 72.27 2.2098995542252 3.62e-13 2.7248407287911 1.74e-09 1.28471407430311 0.0412951229421112 2.37003253358419 7.54e-07 6.6 8.34 8.99 8.78 8.38
"410" "Amotl1" 0.67 0.53 0.6 0.99 1.74 2.67 17.74 3.94 10.37 12.91 35.3 3.22515991698826 3.63e-13 3.89407886698404 2.98e-10 4.210151973478 4.68e-13 5.66133115632936 9.38e-36 0 0 0 0 6.39
"411" "Tmem20" 5.92 6.54 6.68 9.96 28.71 25.11 58.44 35.13 92.4 64.65 132.83 2.34054758667653 3.85e-13 3.66687369850777 5.18e-19 3.15163121690197 3.12e-12 4.19048996165635 5.34e-29 0 0 0 0 0
"412" "Mthfd1" 216.96 243.62 206.96 215.74 400.94 486.63 831.66 554.91 644.59 709.53 478.78 1.36437832156202 3.93e-13 1.54551096188239 9.61e-07 1.68399283980402 4.61e-08 1.11649204297537 0.00100718411368612 6.6 8.6 9.65 9.95 8.83
"413" "Chtf18" 16.72 31.92 34.76 33.39 37.67 53.45 166.31 142.85 187.11 155.59 109.26 1.77709278271421 4.38e-13 2.67996991423224 3.56e-14 2.41383258863532 9.46e-11 1.90384857762956 3.16e-06 0 6.44 8.02 7.52 6.82
"414" "Ehd2" 99.94 81.24 89.87 64.93 121.96 176.77 457.09 177.87 244.46 173.65 8.42 1.4745682758842 4.4e-13 1.54122306639686 9.82e-06 1.04780705497668 0.00724614117558785 -3.31841131222638 8.54e-07 6.1 6.94 7.76 8.04 5.58
"415" "Arhgap11a" 121.62 100.96 103.35 107.8 170.57 239.33 548.24 177.85 375.71 290.57 221.86 1.38908099569811 4.41e-13 1.79282228146039 5.82e-09 1.4220885249161 1.87e-05 1.03285234769931 0.00378348938324811 0 7.88 9.05 9.17 8.57
"416" "Klhl23" 2.09 1.29 0.97 1.73 4.16 8.76 24.68 14.67 32.64 0 3.29 3.10383993051631 4.5e-13 4.42449782852791 1.09e-16 NA 0.248640269093145 1.11401626029166 0.224493553552474 0 0 6.58 0 0
"417" "Mcm4" 209.35 211.66 196.16 229.2 326.77 415.14 915.87 524.88 552.31 418.49 325.73 1.36672701812585 4.68e-13 1.38418975743122 2.74e-05 0.983904658039477 0.00730257657519658 0.622388107924416 0.125965020375983 4.75 7.16 8.66 8.8 8.21
"418" "Rcl1" 148.74 169.59 161.33 157.82 363.51 377.5 618.1 417.4 561.75 470.74 464.06 1.4785938242896 4.89e-13 1.81754813916457 3.68e-08 1.56255036753857 7.62e-06 1.54193126844472 7.45e-06 7.53 8.53 10.5 10.3 9.58
"419" "Tcfap4" 38.3 50.87 49.41 43.63 107.72 142.4 217.87 145.86 165.48 105.15 128.48 1.75228402369592 5.2e-13 1.86105472377342 4.29e-06 1.20684671115743 0.0110663288269998 1.4959416590556 0.000497267096230257 0 0 0 0 0
"420" "Lmnb2" 71.67 81.85 88.94 92.3 130.16 165.28 314.37 321.91 307.25 166.75 220.78 1.47676930947273 6.29e-13 1.87628585800601 1.66e-08 0.99455960881793 0.0173550262713158 1.39948233470674 0.000120394289744018 0 0 7.85 7.51 7.3
"421" "Orc6" 99.33 105.43 91.71 104.51 182.38 229.59 383.05 393.57 376.89 346.57 191.73 1.56764896310916 6.42e-13 1.91061323654733 6.47e-08 1.78961649644945 8.03e-07 0.935545813192665 0.0328956187859668 0 0 8.33 8.41 7.82
"422" "Hist2h2ab" 411.88 844.89 195.26 471.41 544.27 1217.08 1681.7 1882.19 4169.49 3496.69 2009.88 1.46915772000046 6.96e-13 3.1161821014142 2.36e-29 2.86230107243707 8.11e-24 2.06342054103797 7.41e-11 4.34 8.2 10.4 10.2 9.33
"423" "Hcrtr2" 35.97 26.59 33.75 28.3 5.64 4.73 1.83 6.36 0.32 2.09 0.94 -2.74715123425658 7.91e-13 -6.60513222938415 3.63e-08 -3.89777309730327 1.1e-05 -5.05054337770651 3.29e-07 0 0 0 0 0
"424" "Kynu" 352.71 303.3 349.66 260.77 172.58 123 43.36 62.95 11.03 33.74 151.57 -1.65590614305541 7.95e-13 -4.84320212709763 2.99e-14 -3.23017494440145 1.31e-08 -1.06272259162395 0.0551864524459972 0 0 0 0 6.09
"425" "Vpreb3" 632.08 698.38 557.31 599.29 648.36 1087.54 2265.12 2486.73 2103.05 1363.73 0 1.38327691477853 8.1e-13 1.75804183773716 3.28e-08 1.13311672582417 0.00187553023272938 NA 3.91e-18 0 8.13 9.55 9.58 0
"426" "Prmt5" 179.76 162.81 168.25 210.11 295.24 355.15 669.92 571.71 483.03 577.96 292 1.39199624877362 9.87e-13 1.42225360947936 3.28e-05 1.68111046359728 2.14e-07 0.696109183918725 0.0987749675877356 5.76 7.56 9.26 9.86 8.27
"427" "Xrcc6" 253.26 219.32 245.77 282.75 364.25 514.11 914.98 814.59 438.25 625.12 382.68 1.38131905405232 1.01e-12 0.808239903743425 0.0489195269318878 1.32061897339284 0.000159294319801072 0.612624316182579 0.158371572285894 7.45 8.36 9.61 9.83 9.35
"428" "Kcnn4" 107.34 135.45 128.34 162.75 356.75 341.78 344.59 458.9 330.29 312.5 534.26 1.49231661358427 1.01e-12 1.30721778629077 0.00063689702947006 1.22734068542723 0.00180377903375435 2.00102650240355 6.29e-10 5.32 7.26 8.81 8.65 9.06
"429" "Recql4" 17.2 11.45 19.55 14.08 29.79 37.51 97.17 69.76 144.32 130.84 71.8 1.91108501742576 1.1e-12 3.21243039417634 1.86e-19 3.07096281500374 3.07e-17 2.20521489963138 2.21e-07 5.5 0 8.09 8.26 6.87
"430" "Gcat" 7.64 6.54 6.77 17.18 23.11 24.92 81.95 66.23 20.32 11.24 248.04 2.36340013536398 1.14e-12 1.09197387104605 0.163402145554663 0.237715504494811 0.845948862285354 4.70157435842049 3.21e-39 0 0 6.28 0 7.93
"431" "Umps" 139.6 132.83 110.05 145.4 235.41 267.21 478.83 395.4 433.38 354.43 326.45 1.38308948239554 1.15e-12 1.71542256913103 7.65e-08 1.42529071594052 2.68e-05 1.30665203438071 0.000129133810515465 0 8.13 8.89 8.85 9.1
"432" "Tyms-ps" 11.66 13.3 7.95 13.16 21.72 53.92 92.49 98.56 87.72 111.34 94.69 2.53326422651767 1.23e-12 2.92907821406938 6.1e-08 3.27307248526162 9.51e-11 3.03938447598616 6.37e-09 0 0 0 0 0
"433" "Snora23" 15447.63 11132.48 450.99 327.59 30343.75 28690.74 1275.74 412.32 13774.34 19549.66 23658.37 1.15023322480779 1.31e-12 1.00998404129511 3.92e-05 1.51514436480314 8.28e-10 1.79035152701264 2.88e-13 0 0 0 0 0
"434" "Slc7a11" 15.32 23.56 13.54 26.71 21.5 50.83 79.12 77.67 104.15 55.14 47.69 1.53380673537809 1.42e-12 2.39636617704185 7.24e-14 1.47887451012403 0.000123402164375932 1.26946202550819 0.00138306749351428 0 0 0 0 6.12
"435" "Rps27l" 523.28 599.77 201.92 422.2 912.12 1413.23 1146.05 1343.08 1244.72 1616.09 2534.59 1.4623599949748 1.42e-12 1.51080125465868 1.4e-05 1.88748755435901 6.61e-09 2.53673240345638 5.76e-18 0 7.33 9.07 9.14 8.85
"436" "Agpat5" 37.23 34.62 34.72 48.38 103.61 84.54 161.69 121.54 232.08 249.51 367.96 1.60508779341167 1.53e-12 2.58281944572442 1.46e-15 2.68729488292818 2.1e-17 3.24774618815665 5.85e-29 8.17 8.39 10.4 10.7 10
"437" "Wls" 77.22 69.45 89.9 113.64 28.06 21.36 15.91 20.06 16.55 32.9 21.13 -2.0360812482795 1.57e-12 -2.40331715735573 0.000152641090205599 -1.4120607904277 0.0216861940924703 -2.05085560711537 0.000749211522886502 0 0 0 0 0
"438" "Psmd8" 580.43 654.43 472.97 704.8 1057.27 1203.51 1706.11 2050.5 1316.52 1402.41 1529.84 1.31853118260326 2.08e-12 1.12612275698073 0.00109788457787792 1.21730150713643 0.000322643675608332 1.34277409359297 3.21e-05 0 8.77 9.5 9.85 8.71
"439" "Traip" 12.99 23.03 21.17 16.76 33.89 56.94 113.23 80.12 168.99 174.24 76.8 1.94218297182657 2.23e-12 3.19231582497427 3.95e-18 3.23645380673048 5.81e-19 2.05455616362209 5.74e-06 0 0 8.65 8.01 6.56
"440" "Cdc25a" 72.27 87.92 73.56 85.05 166.84 185.08 279.61 228.41 308.5 181.32 242.94 1.43158437383264 2.97e-12 1.95261886004631 1.22e-09 1.18588643700815 0.00188178966096575 1.60794841951978 2.08e-06 0 7.64 9.46 9.56 9.21
"441" "Tmem97" 28.09 40.32 49.53 47.21 98.75 129.99 203.45 194.12 326.54 392.53 368.7 1.92309994434277 2.97e-12 2.98348275803491 2.46e-15 3.24902594985157 1.31e-19 3.15867044680829 3.69e-18 6.68 8.66 10.1 10.7 9.68
"442" "Hist1h4c" 3310.32 5213.97 1058.15 2264.36 4447.39 6970.26 7087.78 8719.12 9394.77 14242.48 7583.79 1.20041078456894 3.18e-12 1.66543232957687 2.51e-09 2.26570296232859 6.85e-18 1.35649350277552 1.84e-06 0 7.57 8.33 7.98 7.38
"443" "Wdhd1" 131.1 116.18 125.91 106.61 186.37 240.37 470.29 318.41 531.81 577.28 230.73 1.34097361397192 3.33e-12 2.1484777478357 2e-13 2.26683808607458 2.75e-15 0.943772440829821 0.0100764346792572 6.58 7.46 9.29 10.1 8.07
"444" "Snora17" 732.11 769.11 223.07 255.18 3178.53 2138 759.67 744.09 2621.58 1371.81 4202.08 1.78471888155006 3.4e-12 2.40532236906823 7.7e-11 1.47096647488081 0.0006940231043677 3.08598942591039 1.44e-20 0 0 0 0 0
"445" "Mns1" 42.78 29.08 30.12 34.83 60.7 86.7 213.14 124.83 216.19 259.44 141.18 1.82691125387015 3.4e-12 2.66012610534564 2.28e-12 2.92322724237309 5.75e-16 2.04536203986274 1.31e-06 0 7.19 8.57 9.13 8.04
"446" "Islr2" 4.77 7.77 2.7 3.09 14.87 22.42 25.24 29.12 1.4 3.36 0 2.32192809488736 3.99e-12 -1.71070805359492 0.444324186014283 -0.447673647761125 1 NA 0.0138675345100954 0 0 0 9.75 0
"447" "Adarb1" 4.55 5.4 5.11 4.68 8.96 14.7 41.23 19.91 48.72 53.76 16.58 2.10294227499416 4.52e-12 3.30339214344994 2.52e-16 3.44541114832236 1.43e-18 1.74832201703935 0.00127812783449471 5.18 7.52 9.36 9.44 7.9
"448" "Nop58" 592.98 592.96 513.87 623.55 1129.66 1332.65 1813.82 1489.14 1875.74 2079.59 1662.91 1.3111754597848 4.74e-12 1.69124715273491 3.42e-08 1.84008640875964 8.11e-10 1.5174973750225 1.13e-06 7.35 9.6 10.6 11.1 9.95
"449" "Sord" 35.29 26.96 26.86 37.67 41.68 86.35 148.64 155.33 51.77 70.32 42.48 1.7687041392821 5.13e-12 0.707861050204831 0.246270744331812 1.14967980248731 0.0272754081756797 0.422528498148057 0.516256354453004 0 0 7.27 7.37 6.6
"450" "Cth" 4.02 1.33 1.49 1.97 12.18 14.4 34.17 34.23 66.95 23.44 5.85 3.43040983193792 5.15e-12 4.92587013129126 1.06e-16 3.41175864550183 1.03e-05 1.40929460555035 0.159107878073945 0 0 8.41 8.27 7.02
"451" "Hspa1a" 199.46 97.33 53.89 1.27 357.08 533.98 21.72 2.18 3.45 7.54 10.87 1.37833818734865 5.59e-12 -4.67263031391769 1.01e-08 -3.54466215231456 2.67e-06 -3.01694664055592 3.21e-05 0 0 5.53 5.59 5.66
"452" "Il12a" 226.21 236.49 160.93 138.1 42.09 46.18 37.31 45.75 95.31 11.08 3.59 -2.15250192554756 5.66e-12 -0.998580220090416 0.193134430555576 -4.10324992947588 2.89e-08 -5.72915206170201 1.87e-11 0 7.64 9.91 8.25 0
"453" "Rasgef1b" 924.93 976.32 897.34 806.83 517.76 390.3 96.86 242.15 23.34 60.44 41.79 -1.53162488246977 5.69e-12 -5.27121895938083 6.63e-16 -3.89851985992335 7.24e-11 -4.43086576176577 5.45e-13 0 7.58 6.29 0 6.85
"454" "Arhgap24" 190.98 220.6 160 138.29 61.47 75.66 36.33 39.48 12.97 50.47 50.36 -1.73710786476845 5.81e-12 -3.77430446029885 9.78e-10 -1.81405685325212 0.00156707800994094 -1.81720465683153 0.00121339488968033 5.34 7.28 7.52 8.54 8.04
"455" "Pdlim1" 50.57 70.63 67 50.65 129.37 148.22 270.55 223.24 124.98 67.91 128.29 1.69133686408248 5.83e-12 1.06559236840318 0.031966615106756 0.185591060625391 0.776325638451677 1.10330384223359 0.0219121263056681 0 7.51 8.69 8.91 8.72
"456" "Dhcr24" 31.79 50.11 57.37 39.17 112.11 95.05 173.7 133.02 501.1 258.15 414.28 1.52599245090902 6.39e-12 3.48965948454337 1.36e-36 2.53277054487515 9.27e-16 3.21516712046666 1.09e-29 0 7.16 9.14 8.79 8.66
"457" "Abhd14a" 23.63 27.7 24.57 25.69 79.49 71.43 129.91 141.37 128.44 115.12 207.75 2.05516818110691 6.71e-12 2.33833617259816 8.49e-07 2.18038009961269 1.18e-05 3.03209007941746 1.92e-13 0 7.62 9.04 9.06 8.66
"458" "Rsl1d1" 451.27 392.93 422.12 562.99 845 888.05 1493.31 1344.82 1351.96 1157.43 1148.56 1.32126705031695 7.08e-12 1.56375288875369 1.26e-06 1.33962536468121 8.63e-05 1.32852664515089 7.31e-05 7.69 9.03 10.3 10.6 9.66
"459" "Bdh1" 23.25 21.08 17.75 25.03 52.49 66.91 96.76 84.54 84.33 114.41 110.75 1.78741461685356 7.26e-12 1.9532076084937 4.86e-06 2.39330290525286 9.75e-10 2.34639644772194 2.02e-09 0 7.78 8.81 9.45 8.69
"460" "Gimap8" 1269.46 1090.77 1228.05 1313.38 662.43 495.78 148.44 376.51 127.7 190.32 54.12 -1.54209809144936 7.26e-12 -3.26243998605359 5.67e-08 -2.68677133421854 4.32e-06 -4.50096476666714 2.55e-12 0 0 6.72 0 6.03
"461" "Ruvbl2" 284.14 318.03 277.01 367.8 497.15 551.3 1065.8 1017.49 898.37 853.58 667.89 1.32852611737289 7.61e-12 1.52694333023818 3.78e-06 1.45315995194866 1.66e-05 1.09924409237819 0.00227662851387811 0 8.19 9.61 9.79 8.79
"462" "Hsp90aa1" 856.18 963.89 396.05 597.17 1251.5 2025.97 1948.74 1544.91 1296.28 2211.3 3159.13 1.26713621095607 8.02e-12 0.882119101495753 0.00673827112187426 1.65263648782094 2.19e-08 2.16726902959542 1.12e-14 7.92 9.4 10.8 11.6 11.6
"463" "Nacc2" 8.76 11.61 9.97 13.12 31.83 33.87 41.33 41.37 54.93 21.76 151.43 1.77173101232688 8.09e-12 2.33790611733721 1.97e-09 1.00199038206906 0.0672655669193831 3.80089096825277 1.04e-35 0 0 0 0 5.58
"464" "Enpep" 0.86 0.57 0.21 0 1.52 5.92 14.26 7.4 147.57 2.64 0 4.14925143317756 8.98e-12 8.4915598358264 2.27e-77 2.68684211474037 0.0173098094033601 NA 1 0 0 8.48 0 0
"465" "Crisp3" 37.45 22.39 48.25 61.99 4.61 3.74 2.74 6.35 0 8.01 5.06 -3.28574155675418 9.35e-12 NA 8.49e-06 -2.40826744912239 0.0146674496048782 -3.0709323068368 0.00277632460159912 0 0 0 0 0
"466" "Rfc4" 124.18 116.89 79.25 100.6 202.21 228.67 471.04 326.44 350.02 432.12 249.24 1.54511547261223 9.55e-12 1.73389129850374 4.33e-06 2.03788594444683 1.01e-08 1.2439895611012 0.00236956279322337 5.44 7.4 8.26 8.25 8
"467" "Tubb5" 1769.72 1896.12 1983.93 2361.34 3025.65 3806.21 9046.2 8187.99 5151.66 3044.2 2941.65 1.58692531142763 9.55e-12 1.3630352285842 0.000475234414290222 0.604060992337384 0.23037250631687 0.554623450915192 0.269122515347217 5.48 7.99 9.67 9.37 8.74
"468" "Gen1" 40.11 45.11 30.17 40.77 77.4 93.55 154.34 133.91 166.74 205.74 121.55 1.55609768400016 9.7e-12 2.09457528235883 3.25e-09 2.3977973520939 7.72e-13 1.6385249353532 1.72e-05 7.29 8.22 8.82 9.25 8.33
"469" "Set" 317.17 337.47 324.42 610.58 596.55 968.61 1367.48 1112.87 1053.32 860.04 795.31 1.34762150787141 9.7e-12 1.40624371501185 5.01e-05 1.11377558487058 0.00342818504747554 1.00088913559572 0.00952297660457609 7.63 9.48 10.7 11.3 10.3
"470" "Kif20b" 110.31 92.97 91.27 97.52 144.76 185.76 390.96 246.45 355.68 279.97 273.04 1.30379146115129 1.03e-11 1.85946859802203 9.25e-10 1.5141609889647 3.12e-06 1.4780010640939 4.23e-06 0 7.84 8.75 8.64 8.31
"471" "Pop1" 79.39 69.7 61.27 60.09 131.2 141.89 255.91 191.66 357.49 342.47 282.12 1.41395687375556 1.04e-11 2.40254098872916 2.36e-15 2.34061571759825 1.81e-14 2.06094704733332 8.44e-11 7.63 9.43 10.6 10.8 10
"472" "Gcsh" 36.14 60.75 41.38 45.75 126.48 117.96 206.25 189.48 213.73 214.37 214.43 1.7985924976573 1.17e-11 2.21592685223447 8.39e-08 2.22024044959038 7.68e-08 2.22064418887685 5.77e-08 6.37 7.58 8.69 9.27 8.68
"473" "E130012A19Rik" 5.18 9.74 11.11 11.41 18.83 28.5 87.38 49.71 52.27 78.19 44.7 2.30034278176467 1.37e-11 2.48140272437649 5.74e-06 3.06240367295751 2.55e-10 2.25569439648728 6.43e-05 5.97 7.32 8.46 9.46 8.45
"474" "Vim" 1177.02 1430.14 1404.1 1808.13 2177.56 2619.35 5151.98 5260.23 2396.37 1985.59 3695.63 1.3859968410957 1.53e-11 0.719982742819668 0.101882412612432 0.448699819869946 0.394873980101603 1.34495238898069 0.000128118653031981 0 8 8.88 9.23 9.03
"475" "Mrpl12" 226.57 270.59 206.85 284.89 440.19 589.3 874.94 751.62 874.13 1051.21 744.78 1.4253857609956 1.64e-11 1.82202321278593 7.85e-08 2.0881543603732 1.03e-10 1.59098969241856 5.84e-06 7.24 7.77 9.56 10.1 8.95
"476" "Cenpk" 17.57 28.35 23.91 18.33 45.49 75.47 161.71 99.58 156.95 77.41 94.98 2.11632037256437 1.73e-11 2.83210889989832 4.95e-10 1.81239572512878 0.00131709344910867 2.10749953228718 4.83e-05 0 0 7.39 7.46 7.04
"477" "Egr3" 209.01 311.25 270.96 123.95 89.73 79.87 34.87 44.97 6.81 10.2 1.65 -1.87534692705297 1.84e-11 -5.07024115173868 2.1e-11 -4.48739870289189 3.36e-10 -7.11542992550494 8.52e-15 0 8.05 8.68 8.54 8.2
"478" "Snora68" 2243.38 1767.21 737.5 633.16 8105.54 5505.41 883.69 967.69 2854.42 2380.53 6077.87 1.52274449601088 1.84e-11 1.08525629639547 0.00529040306320963 0.823341477682189 0.0386611572839822 2.1756244847724 1.77e-11 6.57 9.19 10.6 10.5 9.63
"479" "Tuba1c" 48.27 81.56 62.73 71.74 103.11 140.65 248.23 280.27 171.38 159.02 133.77 1.5469102224623 1.9e-11 1.37502233217003 0.00109467790152201 1.26703180019216 0.0035313396021869 1.01757818050613 0.0257767081698087 5.79 8.42 9.33 9.43 8.91
"480" "Ndc80" 79.03 92.25 75.81 96.25 110.06 176.78 356.54 298.53 316.64 207.44 158.44 1.45595127134858 1.92e-11 1.8832055726994 6.08e-08 1.27305616650518 0.00154937007541187 0.884298661556503 0.0440295333593659 0 7.13 8.97 8.9 7.85
"481" "Cenpw" 10.39 18.96 11.21 9.97 36.88 58.33 83.9 72.13 114.04 90.37 72.75 2.31385408938219 1.94e-11 3.17432785932 3.58e-11 2.83870374274684 2.68e-08 2.52580706806506 2.3e-06 0 0 7.99 7.79 6.94
"482" "H2afj" 242.65 522.99 227.59 312.94 414.27 850.72 799.58 1044.06 1328.5 1285.42 1528.24 1.25093623424952 2.06e-11 2.02445554978336 1.94e-12 1.97689714667748 8.01e-12 2.22652844884987 1.25e-15 6.38 9.28 10.6 10.2 10.3
"483" "Pcdhgc4" 3.13 1.66 1.78 0.71 6.01 12.19 18.75 11.87 21.12 13.27 2.1 2.74546193958246 2.09e-11 3.53659947915976 3.59e-10 2.8661580151715 6.71e-06 0.206450877467427 0.805129068802674 0 0 6.25 7.15 0
"484" "Itga2b" 6.68 10.08 12.46 5.16 7.18 9.96 32.71 93.62 5.61 14.22 7.49 2.06110764672156 2.1e-11 -0.615496868869268 0.834115046064312 0.726351920141355 0.33832092637529 -0.19853192101931 1 0 0 6.49 7.13 6.11
"485" "Hist1h2aa" 34.07 128.63 27.45 113.64 103.13 337.87 333.08 517.59 667.8 504.18 414.07 2.08809124688987 2.29e-11 3.13634171265865 1.78e-13 2.73086450922499 2.7e-09 2.44680030030622 3.32e-07 0 0 0 0 0
"486" "Acot7" 27.29 26.19 21.94 31.22 63.17 84.8 154.96 112.52 126.58 136.56 201.38 1.9619261714979 2.36e-11 2.24730078731364 1.41e-06 2.35678627793876 2.35e-07 2.91717172405354 6.23e-13 6.41 7.83 9.05 9.13 8.9
"487" "Nod1" 174.96 190.68 231.23 166.95 99.61 72.5 35.68 56.27 36.83 43.95 67.15 -1.53236691867469 2.57e-11 -2.37427939389065 1e-05 -2.11929762575962 6.93e-05 -1.50777339147559 0.00365008951172107 0 6.66 6.46 7.81 7.21
"488" "H2-Q7" 470.29 907.46 702.9 544.78 270.18 282.36 142.93 205.95 313.21 246.63 667.38 -1.54228236570509 2.69e-11 -1.0673515505459 0.0598523588294434 -1.41213352608815 0.00919126160827735 0.0240266270782653 0.984296860952985 0 6.01 7.93 6.74 7.42
"489" "Gm13498" 132.92 178.91 124.58 197.53 250.6 403.89 531.03 438.12 394.11 249.1 381.41 1.35681358146283 2.7e-11 1.31425205509549 0.000281645167503373 0.652378720328722 0.146396765780186 1.26699636820369 0.000423918611617621 0 0 0 0 0
"490" "Mdfic" 156.49 179.77 131.96 140.38 78.5 54.97 26.98 29.97 19.31 33.63 65.75 -1.67630931956859 2.74e-11 -2.97807426445131 4.97e-07 -2.17767364987538 0.000150035820924359 -1.21043153433493 0.0376659556276561 0 0 0 6.23 6.62
"491" "Phf1" 211.36 195.21 372.12 238.3 115.91 77.31 67.55 86.17 69 75.46 42.88 -1.55154740434273 2.76e-11 -1.88156532121764 0.000324610293165402 -1.75244958296043 0.000747691290949838 -2.56785677731276 1.49e-06 6.88 7.76 8.27 8.47 7.31
"492" "Fen1" 199.6 241.57 166.37 260.92 319.83 348.98 742.17 710.1 554.15 306.94 663.55 1.28826772834612 2.94e-11 1.35181714276496 7.69e-05 0.499497266057883 0.27293768568405 1.61174577800236 4.3e-07 0 0 8.52 8.02 8.25
"493" "Tkt" 667.83 810.78 617.95 751.54 1300.02 1380.82 2127.16 2227.95 1904.3 1912.84 2337.48 1.30474542869267 3.13e-11 1.41926097429259 1.79e-05 1.42571640228623 1.72e-05 1.71495421919068 3.81e-08 6.42 8.09 10.1 10.8 9.42
"494" "Rras2" 508.68 460.43 456.53 552.5 269.61 178.32 89.49 164.66 14.84 67.88 204.72 -1.49443719840073 3.27e-11 -5.05850963218312 1.46e-15 -2.86501415926126 1.42e-07 -1.27242057676447 0.0142386492704554 0 5.55 0 0 5.97
"495" "Tln2" 1.29 0.79 1.1 0.88 2.41 5.39 12.71 3.74 18.38 1.46 103.96 2.57843311477668 3.43e-11 4.17858513410386 2.18e-19 0.524488641694841 0.56965627627881 6.67840500128702 1.03e-94 0 0 0 0 0
"496" "Hist2h3c2-ps" 19.1 25.96 5.29 18.39 27.1 67.67 120.86 125.17 194.21 239.31 64.75 2.3097035787409 3.5e-11 3.49839573115864 3.26e-14 3.79965892692768 2.86e-18 1.91373034108898 0.00177301099685225 0 0 0 0 0
"497" "Ung" 29.98 58.67 31.83 45.83 70.9 87.98 215.64 151.31 194.52 160.26 86.52 1.66072153531807 3.5e-11 2.2260435781142 7.08e-09 1.94653946323176 1.77e-06 1.05723065183748 0.0322567994851183 6.12 7.75 9.24 9.69 9.29
"498" "Ndrg1" 42.22 36.78 50.02 45.39 8.54 10.41 7.62 7.73 7.51 19.99 18.63 -2.34620227957205 3.56e-11 -2.53752604311795 0.00109191612282284 -1.1251323838876 0.14879991236411 -1.22678318169059 0.104498156271177 6.75 7.59 8.3 9.4 8.4
"499" "Ccdc18" 22.83 22.31 20.69 22.65 33.56 61.49 107.66 65.89 120.65 111.4 80.91 1.6020360140801 3.6e-11 2.44740462486841 3.31e-12 2.33232594199269 8.85e-11 1.87096663672205 1.33e-06 5.63 9.02 9.96 10.3 9.32
"500" "Nid1" 46.15 33.58 55.79 56.74 180.82 134.71 95.87 107.89 28.92 20.03 34.65 1.4334818047342 3.65e-11 -0.732919181488729 0.262914551084257 -1.26282431262714 0.0329628947723005 -0.472131381415271 0.498107340351934 0 0 0 0 0
"501" "Mad2l1" 113.44 115.63 100.35 136.18 153.14 241.8 520.54 340.46 419.39 341.97 307.98 1.4316045806716 3.65e-11 1.84920140375482 1.08e-07 1.55477870911755 2.93e-05 1.40374560813608 0.000189711584204242 0 7.01 8.1 8.48 7.13
"502" "Cct6a" 970.38 991.45 851.45 1133.27 1815.72 2143.31 2931.78 2839.46 2447.89 3027.7 2291.4 1.30188781085873 3.65e-11 1.31094670232343 0.000114898328624907 1.61763023553496 4.82e-07 1.21563729852667 0.000352847499247537 6.43 8 9.45 10 8.74
"503" "Ccdc99" 55.35 44.25 43.01 47.68 83.76 98.8 210.04 162.19 163.33 221.3 131.47 1.54374203554658 3.69e-11 1.77959005744574 4.2e-06 2.21780370313435 3.55e-10 1.46653388201523 0.000298233394783113 0 0 0 0 0
"504" "Pou6f1" 86.6 74.14 113.9 75.95 42.96 29.03 18.27 19.4 10.54 22.34 19.95 -1.67674746744662 3.99e-11 -3.05583807410621 4.38e-07 -1.97208375526011 0.000536676142745526 -2.13532419463371 0.000153222261159261 0 0 6.38 6.55 7.09
"505" "Nudt4" 146.18 136.41 116.54 149.25 219.82 263.97 495.16 364.79 323.17 211.46 147.77 1.29300615775542 4.2e-11 1.23711732289054 0.000438381715135178 0.625208831955703 0.142887798821267 0.108177450396409 0.865978658870779 0 7.31 8.33 8.04 7.92
"506" "Fchsd2" 1382.97 1051.96 1430.97 1094.21 681.58 529.95 241.63 283.33 183.14 212.31 198.7 -1.51419801287664 4.26e-11 -2.75935328272972 5.44e-06 -2.54612788526533 2.42e-05 -2.64170833781007 8.87e-06 7.52 8.28 9.71 9.63 9.31
"507" "Snrpd1" 202.05 231.17 135.39 175.8 325.45 500.8 695.23 521.19 632.4 610.54 395.66 1.45628680978495 4.27e-11 1.76473993178672 8.66e-07 1.71398838168019 2.05e-06 1.08816378477487 0.00687251978630345 5.39 7.89 9.64 10.1 8.95
"508" "Anp32e" 308.29 256.83 274.53 271.91 330.59 507.96 1337.34 466.69 1010.83 441.64 329.88 1.24936132308008 4.44e-11 1.86295456263449 4.18e-10 0.668356925671467 0.0949085978251873 0.247427393259485 0.604557227388273 5.45 7.18 9.6 9.08 8.39
"509" "Pfas" 167.09 160.34 194.32 157.83 251.45 314.09 682.97 382.24 618.68 587.46 467.97 1.26282032869309 4.53e-11 1.8645500021467 6.19e-10 1.7898472275728 4.75e-09 1.46177265167761 4.83e-06 6.03 8.14 9.55 9.95 9.6
"510" "Xist" 7.89 0.73 0.35 1367.97 2893.27 2550.41 0.42 0.23 175.09 4787.94 4347.53 1.98328882074128 4.57e-11 -0.975297101678097 0.0150842893509039 3.79793937770864 2.55e-21 3.65873028726568 2.56e-20 0 7.67 0 10.1 9.19
"511" "Nop16" 110.07 128.12 114.75 135.47 221.93 232.76 436.35 412.91 367.15 200.53 330 1.41672390610098 4.58e-11 1.58827686073937 1.31e-05 0.715725345893568 0.131104688908926 1.43437328523768 0.000116512470576365 5.41 8.5 9.57 8.9 9.65
"512" "Lamb3" 21.75 30.34 26.85 21.86 6.09 4.61 2.62 3.68 5.35 15.89 4.04 -2.56788898736221 4.7e-11 -2.23581293709877 0.00829329127066131 -0.66530460903876 0.536877098188792 -2.64099653563548 0.00149798184775418 0 0 0 0 0
"513" "Chchd10" 183.49 321.28 207.07 228.15 268.06 445.45 863.04 856.73 1508.45 641 24.69 1.37218502821005 5.29e-11 2.68234956282927 5.87e-20 1.44767894795496 7.7e-05 -3.25064666729572 2.62e-06 0 7.15 8.92 9.03 6.44
"514" "Fam136a" 149.68 181.46 135.01 193.73 256.13 373.42 504.71 563.92 485.75 538.16 519.52 1.36371378911006 5.9e-11 1.55801030337787 9.9e-06 1.70583147084916 6.14e-07 1.65497559730389 1.16e-06 0 9.06 10.1 10.1 9.59
"515" "Tcp1" 795.94 802.66 763.9 1025.97 1447.15 1554.36 2666.71 2644.74 1961.95 1445.64 1813.49 1.29472827111826 6.07e-11 1.21165427662885 0.00059953569313416 0.771074331851002 0.0591763797756836 1.09813479144747 0.00210212126215038 6.95 8.62 9.62 9.97 9.34
"516" "Tarbp1" 74.72 77.89 87.99 83.74 146.15 155.22 327.14 180.86 597.87 351.94 273.35 1.31929241670244 6.13e-11 2.88232486241679 3.47e-26 2.11782253541941 2.89e-12 1.75324241698271 4.39e-08 0 0 0 0 0
"517" "Eps8l1" 120.7 178.07 165.58 84.71 97.5 72.82 0.6 2.42 35.86 22.46 5.57 -1.66335920246801 6.18e-11 -1.93651641888541 0.001468307510332 -2.61153397935318 2.42e-05 -4.62314267441375 6.23e-11 0 0 0 0 0
"518" "Irak2" 356.8 335.59 338.37 290.11 170.75 148.04 48.01 103.01 18.49 35.45 35.15 -1.4913391567108 6.74e-11 -4.15859944858604 3.76e-12 -3.21955904586336 1.08e-08 -3.23181998403034 6.6e-09 0 6.48 7.47 6.65 7
"519" "Cbx7" 613.8 542.9 729.74 586.76 286.26 240.29 171.99 221.5 126.28 159.36 188.9 -1.4266104199209 6.79e-11 -2.29168083983479 1.31e-05 -1.95601745307969 0.000168448490296898 -1.71068430387204 0.000747291033586377 7.07 7.97 8.4 8.47 8.37
"520" "Slc25a5" 736.69 850.93 613.35 962.32 1378.52 1604.95 2288.82 2213.8 1811.54 2028.9 1597.44 1.24278656940681 6.84e-11 1.19579083835843 0.000457673577227638 1.35927193615053 3.76e-05 1.01433592098134 0.00380459021805235 6.57 7.86 9.11 9.69 8.26
"521" "Nedd4" 468.11 480.89 370.46 333.18 904.11 1001.68 1146.14 915.96 859.65 1003.74 1709.72 1.26359953925001 7.02e-11 1.05704881023325 0.00183722739795976 1.28061312276527 9e-05 2.04898758314734 3.2e-12 6.77 8.87 9.92 9.74 9.32
"522" "Pold2" 132.8 162.47 133.57 172.88 227.1 273.25 568.1 492.26 450.1 611.35 380.13 1.37503827586764 7.25e-11 1.58115325478753 9.78e-06 2.02290625455297 6.06e-10 1.33740057778252 0.000314018129169389 7.18 8.24 9.36 10.6 8.81
"523" "Rasl2-9-ps" 94.58 134.95 86.66 203.82 163.97 352.71 462.27 525.66 458.88 584.63 338.65 1.53277831177311 8.46e-11 1.81957756203009 2.75e-06 2.16898449510532 1.47e-09 1.38125562863515 0.00110400789236496 0 0 0 0 0
"524" "Gart" 292.64 299.05 293.67 344.23 517.9 555.42 1057.87 785.7 828.47 701.88 721.04 1.24625364416489 8.62e-11 1.43034402454997 1.24e-05 1.19111896297499 0.000613522216757653 1.22997386386842 0.00026074032312393 6.86 9.33 10.4 10.5 9.83
"525" "Gfra1" 8.24 7.04 4.15 1.92 6.8 18.02 47.13 30.05 3.37 32.05 0.36 2.25626117723837 8.64e-11 -0.663415573325994 1 2.58608828699825 1.57e-06 -3.89009535306554 0.103362862931658 0 7.95 0 8.68 0
"526" "Tcam1" 2.83 7.2 4.18 4.75 16.84 19.12 39.96 27.23 43.22 154.45 74.09 2.44371295187559 8.74e-11 3.18874010796125 1.95e-09 5.02610900161674 1.1e-38 3.96631986946936 4.74e-18 5.96 8 9.46 10.3 9.45
"527" "Strap" 345.85 390.75 338.82 413.37 643.39 736.18 1191.79 943.31 962.68 873.1 604.13 1.23924896772995 9.32e-11 1.3709879531355 3.09e-05 1.23007853651126 0.000305956304459727 0.698790664929047 0.0740479601084828 7.82 8.15 9.95 9.93 9.41
"528" "Hmgb1" 174.21 221.91 119.41 203.47 237.92 431.83 577.4 484.05 397.39 473.91 311.17 1.26770872850016 9.49e-11 1.14456379811846 0.00124498389355362 1.39862133301157 3.1e-05 0.791711205670071 0.0366895554161644 7.36 8.18 9.66 9.7 8.9
"529" "Loxhd1" 5.49 2.9 6.09 3.63 0.14 0 0.23 0.31 2.01 0.17 0.18 -4.73510798969983 9.56e-11 -1.17151913977124 0.465561905710295 -4.73510798969983 0.00749656736996268 -4.65264582950786 0.00745634955540654 0 0 0 0 0
"530" "Slc25a13" 16.25 23.34 22.29 23.57 50.36 53.17 101.47 78.76 148.69 3.91 9.75 1.73151883837169 9.56e-11 2.7991552266 2.8e-14 -2.44983997925615 0.0120334670789883 -1.13160636792653 0.258971903911937 0 6.55 8.63 0 0
"531" "Cct3" 696.27 664.63 672.52 799.46 1283.09 1327.04 2031.73 2095.14 2245.14 1704.69 1634.81 1.24983680847102 1e-10 1.66453591892661 1.13e-07 1.26723991635693 0.000209705069164559 1.20685348249242 0.000372425944732222 7.68 10.3 11.8 11.4 10.6
"532" "Col5a3" 16.28 17.66 8.8 6.41 16.67 39.89 38.69 52.98 4.75 36.32 8.46 1.59257413994072 1.08e-10 -1.37119199800963 0.225162834502909 1.56357278606297 0.000233767774396457 -0.538461848107993 0.83689568901034 0 0 0 0 0
"533" "Nudc" 186.53 238.52 170.9 205.98 261.94 392.84 804.78 555.68 477.11 523.7 345.76 1.32940344788213 1.09e-10 1.25084561467397 0.000760732340157753 1.38526429461624 0.000123402164375932 0.786294667139032 0.0574011090510149 6.37 7.56 9.47 9.56 8.62
"534" "Grap2" 540.88 453.78 514.46 421.2 251.77 202.61 111.91 142.48 26.44 131.3 215.68 -1.44545058542378 1.09e-10 -4.18997404391718 1.82e-12 -1.87790120964462 0.00039790121859135 -1.16187572424302 0.0300322660480389 0 7.12 6.52 8.41 9.06
"535" "2310015A10Rik" 215.91 209.54 219.34 183.14 113.95 98.72 37.16 51.73 66.94 45.63 90.09 -1.45706371854428 1.13e-10 -1.62856833945957 0.0023308565486499 -2.18145423670044 4.76e-05 -1.20006991486779 0.0251664317975418 5.31 6.63 8.51 8.51 7.77
"536" "Ifrd2" 103.72 126.07 139.7 152.21 232.68 243.67 458.49 420.8 446.98 432.58 559.69 1.37768177276154 1.19e-10 1.77698984648513 2.71e-07 1.72974653159252 8.24e-07 2.1014075379175 6.46e-11 6.57 9.64 10.9 10.9 11
"537" "Atg9b" 0.62 0 0.46 0 2.81 4.25 9.15 8.85 11.74 9.11 40.79 4.53628319715839 1.2e-10 5.44232919094658 7.53e-10 5.07641974163858 6.94e-08 7.23911228962905 1.57e-28 0 0 8.08 8.06 7.52
"538" "Crip1" 2056.53 2527.72 1159.77 1616.19 2883.37 4034.17 4646.37 4975.04 9548.86 3310.37 2822.09 1.16804881110131 1.2e-10 2.37558157632089 1.17e-18 0.847245546497301 0.0114316888730949 0.617017068480345 0.0697197669508458 0 6.51 10 8.59 7.56
"539" "Cenpm" 32.11 20.83 17.79 28.71 47.07 73.25 144.49 137.84 127.18 122.72 89.42 2.01762813189161 1.21e-10 2.35497361244121 1.76e-06 2.30347218645045 4.53e-06 1.84677124949016 0.000682280277578538 0 7.08 8.79 8.6 8.53
"540" "Xylb" 4.64 2.75 2.28 4.54 7.02 13.54 37.91 18.2 37.33 32.41 14.37 2.43175562526294 1.38e-10 3.39342895406029 4.15e-11 3.18953246607506 2.34e-09 2.01615350721456 0.00222418764222642 5.7 7.15 8.52 8.53 7.16
"541" "Ms4a6c" 855.35 657.79 765.43 653.63 506.39 298.38 105.52 184.51 208.05 261 219.69 -1.42131617060287 1.4e-10 -1.81698131692307 0.000608709116647017 -1.48986179851058 0.00529861834631962 -1.73844240363173 0.000831338396358995 0 0 0 0 0
"542" "Ninl" 0.95 1.64 1.58 2.61 4.67 7.74 19.24 14.5 11.13 4.58 3.91 2.76697346939679 1.41e-10 2.71509641420562 0.000117663961964698 1.4340623249606 0.156375479249467 1.20588333417101 0.237208750963266 0 0 5.93 0 0
"543" "Faim3" 5069.28 4746.31 4813.89 5273.95 2185.6 1860.09 698.02 1981.72 103.51 251.09 117.73 -1.56531865836368 1.43e-10 -5.58710311282665 9.69e-14 -4.30866869217736 6.34e-10 -5.40139126936152 2.49e-13 6.13 7.2 7.05 7.55 7.18
"544" "Olfml2b" 1.17 1.16 0.86 2 2.36 8.72 27.49 12.48 65.45 184.49 4.54 3.29810451740728 1.61e-10 5.65658674847472 1e-26 7.1516642705049 8.17e-65 1.80695775893303 0.0761066256597178 0 0 6.31 7.1 0
"545" "Cbx3" 182.9 214.63 149.46 264.99 257.55 509.86 614.31 616.14 448.06 410.97 358.26 1.29893939212102 1.61e-10 1.14224774481894 0.00240291979759694 1.0175888912439 0.00937999500853061 0.819562781935385 0.0438563880076726 6.14 9.61 10.9 11.2 10.4
"546" "Laptm5" 1264.39 1135.62 2055.07 1189.91 757.42 544.31 400.11 480.21 464.6 485.97 733.94 -1.37128686500258 1.63e-10 -1.60290996603242 0.00248889962396485 -1.53803186434625 0.00357915299769871 -0.943236993405734 0.0765494435454531 4.96 8.85 10.4 10.4 9.99
"547" "Eps8" 69.43 78.41 52.9 56.38 85.97 131.52 230.9 180.5 91.49 156.97 3.99 1.29036586130548 1.64e-10 0.509244134177944 0.247599662986036 1.28804702443797 0.000297056873212145 -4.00990927745275 1.1e-08 0 6.17 7.35 8.24 0
"548" "Rgs13" 124.27 58.24 45.9 87.04 22.59 18.71 5.58 13.57 0 0.74 1.56 -2.38359710620381 1.77e-10 NA 3.77e-09 -6.73567036471135 2.19e-08 -5.65972151147805 9.51e-08 0 0 0 0 0
"549" "A630055G03Rik" 16.15 23.64 23.39 9.72 36.92 45.79 86.15 62.5 124.48 57.34 37.56 1.66614873773682 1.9e-10 2.77192324577189 1.71e-14 1.65362309002622 0.000259079829818177 1.04327824843947 0.0415742971400303 0 0 0 0 0
"550" "Il4ra" 965.62 973.05 1046.42 1069.48 487.01 390.66 195.06 394.94 155.98 174.9 241.44 -1.46602130000503 1.92e-10 -2.70011595873327 5.91e-06 -2.53494672580107 1.89e-05 -2.0698123040834 0.000300891051463798 5.79 7.12 7.64 7.43 7.18
"551" "Maoa" 0.58 1.72 1.29 1.28 3.51 4.49 21.73 11.88 4.35 5.61 54.84 3.09493661096242 2.01e-10 1.83709362865375 0.0579964734255562 2.20407899852645 0.0150247962380887 5.49323489369688 2.81e-28 0 6.89 5.91 0 8.14
"552" "5330426P16Rik" 97.17 78.31 106.19 93.28 33.74 22.87 18.42 17.54 11.29 37.34 29.66 -2.01808159637649 2.1e-10 -3.05358083222109 3.37e-05 -1.32790439076788 0.057597295823194 -1.66010772053946 0.013871434567558 0 6.72 7.03 7.3 7
"553" "Ece2" 19.34 14.6 13.24 19.86 48.15 44.99 70.31 61.31 51.23 75.01 68.11 1.74529125126485 2.33e-10 1.61196674275521 0.0010097155123118 2.16206079308722 4.7e-07 2.02284448313936 3.35e-06 5.46 9.65 10.6 10.7 9.97
"554" "Polr1b" 164.37 157.74 176.76 213.07 337.92 360.99 527.28 465.09 509.38 437.64 421.78 1.24828795926103 2.35e-10 1.51698665494126 4.18e-06 1.29798894486379 0.00020114055722526 1.244735026273 0.000326396752024764 7.56 8.89 10.4 10.3 9.64
"555" "Kcnk1" 0 0 0.77 0 1.19 3.15 24.08 6.76 21.47 5.31 1.52 5.51375322677706 2.37e-10 6.80131993516387 8.22e-12 4.78578151010925 0.000987681326693024 2.98114097274868 0.122148761755609 5.47 0 6.28 0 0
"556" "Cad" 157.75 189.93 223.38 188.24 320.05 352.33 800.4 326.58 678.04 695.85 496.17 1.2447419438216 2.38e-10 1.83670037743288 2.39e-09 1.87410633873915 9.53e-10 1.38616449981422 2.75e-05 7.26 8.35 9.52 9.93 8.98
"557" "Blm" 53.84 65.5 49.48 51.89 83.92 109.53 220.77 132.3 244.67 198.04 119.69 1.30812229536233 2.44e-10 2.14868522026774 3.92e-12 1.84363985722122 1.65e-08 1.11715062415365 0.00280935721692473 0 7.14 8.42 8.65 7.43
"558" "Pxk" 1156.93 1111.54 1238.83 999.72 576.78 427.44 306.01 373.28 176.19 204.19 102.19 -1.42070156130111 2.44e-10 -2.67696990327656 2.1e-06 -2.46418973353936 1.11e-05 -3.46284792147519 2.67e-09 6.6 6.88 7.53 7.41 6.62
"559" "Hk2" 42.52 56.13 42.58 35.23 83.26 104.68 169.55 85.18 164.75 139.29 162.86 1.32689041441885 2.56e-10 1.90093727517456 5.25e-09 1.6587504966796 1.14e-06 1.8842911173783 5.01e-09 6.1 8.3 10.3 10.4 9.94
"560" "Rad51l1" 15.6 20.57 16.33 17.18 50.18 61.43 97.31 65.62 162.24 202.09 173.2 1.97819983365089 2.73e-10 3.21931302840448 3.81e-15 3.53618140569472 5.36e-20 3.31362240101522 1.29e-16 0 0 0 0 0
"561" "Suv39h1" 96.53 95.44 103.66 122.32 149.61 173.48 380.81 327.82 313.05 300.19 169.75 1.30364922284409 2.86e-10 1.58306274041195 5.12e-06 1.52254555755504 1.66e-05 0.700081213663055 0.119473453197674 0 5.96 7.67 8.43 7.3
"562" "Grip1" 0.68 0 0.25 0 0.26 2.94 15.07 6.53 18.46 10.71 0 4.73696559416621 2.89e-10 6.31102802653774 4.53e-14 5.52558395364222 7.16e-09 NA 1 0 0 7.56 7.94 0
"563" "Rcc2" 573.04 639.52 698.05 625.7 898.32 1161.23 2400 1655.78 1690.67 1424.69 1124.84 1.26969926326232 3e-10 1.41486399980651 3.32e-05 1.16791694630979 0.00125715172336305 0.826988714178278 0.0333730686246034 6.98 9.47 10.6 10.7 10
"564" "Gabbr1" 63.01 47.13 122.52 52.76 30.77 21.51 15.41 23.86 7.53 28.48 20.35 -1.64045463999891 3.1e-10 -3.24429275601168 2.33e-07 -1.32506537971721 0.0199957825254217 -1.80998573153 0.00129865440343949 0 0 0 0 0
"565" "Nmral1" 180 176.95 159.86 151.17 227.54 315.47 582.35 583.45 345.83 394.23 601.73 1.35511518214821 3.11e-10 1.050258117474 0.010752571405865 1.23923265875651 0.00159967893429163 1.84931137833194 5.47e-08 0 8.33 9.51 9.86 8.94
"566" "Il21r" 992.05 952.95 950.47 847.66 539.97 444.95 154.15 289.19 73.08 162.35 179.1 -1.38998652330429 3.14e-10 -3.67862471013815 3.17e-10 -2.52706586459219 4.73e-06 -2.38540791189232 9.86e-06 0 7.36 8.22 8.36 9.11
"567" "2610528E23Rik" 27.85 36.72 21.34 36.34 61.67 85.06 203.7 110.49 158.57 185.94 132.91 1.91468190452526 3.18e-10 2.37528538691646 3.43e-07 2.60500269558041 4.75e-09 2.12061519028429 1.48e-05 0 0 0 0 0
"568" "Nme2" 768.71 997.68 531.37 901.61 1510.23 1837.26 1717.51 2294.53 1807.82 2608.23 2301.85 1.20182578815349 3.18e-10 1.17646319289586 0.000514835563901328 1.70528324893669 2.46e-08 1.52500597678195 9.5e-07 7.61 8.8 10.2 10.6 9.75
"569" "Sae1" 315.71 275.78 320 352.01 419.67 521.27 1168.94 858.4 740.46 645.41 441.56 1.23220152456221 3.19e-10 1.22906804337944 0.000518193115386528 1.03086217198397 0.00630230199027021 0.483255728128615 0.3017082880598 6.34 8.22 9.76 9.9 9.14
"570" "Oip5" 24.05 26.85 17.19 18.79 45.79 59.31 119.05 102.24 93.7 95.61 65.39 1.90950084816168 3.26e-10 2.10902494474219 1.92e-05 2.13813741669465 1.27e-05 1.59004592014226 0.00324143158804646 0 0 8.73 8.81 7.76
"571" "Ydjc" 28.01 35.07 34.48 30.83 86.18 108.25 150.88 123.54 324.27 138.22 305.66 1.86859359395552 3.43e-10 3.33666271966189 7.11e-19 2.10643354561532 1.11e-05 3.25139492855758 1.07e-17 6.96 9.27 10.9 10.9 10.6
"572" "Ccdc57" 5.35 5.64 4.74 5.75 15.91 23.87 43.92 19.38 63.31 45.88 35.21 2.26269854387421 3.61e-10 3.55943940223802 7.91e-15 3.09487139803041 5.66e-10 2.71299123387772 3.3e-07 6.34 6.89 8.14 8.31 7.76
"573" "Ola1" 243.26 251.51 176.82 238.82 389.59 494.69 658.38 575.54 545.5 554.69 660.69 1.21825050522877 3.65e-10 1.2610627921654 0.000208090239028324 1.28516531228142 0.000150040444407506 1.53745710430993 1.18e-06 7.9 8.19 9.47 9.78 9.11
"574" "Park7" 462.86 641.5 506.91 594.88 936.36 1030.66 1573.17 1642.07 1289.87 1146.59 971.93 1.23205051339357 3.68e-10 1.22569478482478 0.000509848903476274 1.05581871609479 0.0043375652999893 0.817393431786151 0.0350554319876644 6.21 7.4 8.36 9.08 7.65
"575" "Wdr34" 12.08 19.91 21.32 14.77 44.18 46.11 106.35 75.26 135.98 91.96 141.07 1.99777320922616 3.69e-10 2.99809153270207 6.82e-12 2.43377542903222 6.45e-07 3.05110827433898 1.21e-12 5.58 8.52 10.1 10.4 10
"576" "1500012F01Rik" 602.35 767.13 406.24 582.54 1436.78 1557.74 1058.18 1465.82 1392 806.84 2459.32 1.22655862026201 3.77e-10 1.23943642584933 0.00025036696213962 0.452631728727624 0.271704659457056 2.06053668134807 1.43e-12 5.45 7.53 11.2 10.6 10.7
"577" "Atp6v0a1" 324.64 299.49 387.03 271.69 179.62 155.37 74.45 86.7 103.09 86.65 63.78 -1.37053330948724 3.81e-10 -1.63737619065503 0.00172144322148265 -1.88800893045257 0.000297083518090802 -2.33010458224784 7.47e-06 0 8.51 8.53 9.4 8.12
"578" "Timeless" 76.12 83.84 92.65 79.72 121.97 136.82 331.87 211.31 324.76 213.26 199.19 1.27093173605391 3.82e-10 1.96675741631049 3.38e-10 1.35999685924603 0.000138857905485413 1.26152868766995 0.000428230239335083 0 5.92 7.99 6.85 7.21
"579" "Cenpa" 164.44 196.53 161.5 161.11 226.98 338.35 634.1 511.71 617.75 455.33 295.83 1.32377570858839 3.86e-10 1.85391291790647 3.31e-08 1.41380232865085 0.000125543480183552 0.791658175325583 0.0619892293436756 0 7.23 8.41 8.35 7.83
"580" "Xkrx" 139.12 76.05 123.88 83.89 60.11 46.93 15.07 11.55 3.78 10.05 57.41 -1.66188523193638 4.03e-10 -4.80592296656447 9.29e-11 -3.39518560471925 2.32e-07 -0.881079050514275 0.183988717365535 0 0 0 0 7.54
"581" "Mxd3" 30.69 34.94 22.67 27.3 50.67 49.52 152.63 162.18 86.32 46.18 67.56 1.84396993862097 4.15e-10 1.57862537209998 0.00370303160813609 0.676198680386074 0.317715283877041 1.22509983541334 0.0327072570079195 6.17 6.36 9.93 7.98 8.56
"582" "Snora61" 1285.91 1175.12 1165.72 1072.29 7312.71 4669.01 1200.76 2010.29 4706.3 2472.68 4265.56 1.69294697745799 4.18e-10 2.00222723858512 1.52e-06 1.07370949797205 0.0392363540663928 1.86036910827255 9.6e-06 0 8.02 9.89 9.48 9.48
"583" "Snora81" 11475.76 14405.5 685.53 816.16 26519.71 27925.5 815.25 437.82 5889.04 11251.38 6557.4 1.02435489853057 4.37e-10 -0.217173500480712 0.803069406538337 0.716824082842254 0.00275261592556382 -0.0620820715901493 0.514777776757064 0 0 10.4 10.2 9.82
"584" "H2-Q8" 224.64 364.48 304.72 247.27 125.95 95.6 44.31 87.03 110.08 60.1 109.8 -1.69314741681203 4.42e-10 -1.37381359006884 0.0257059302445994 -2.24692906917239 0.000207088491364638 -1.37748791087838 0.0213627242877305 0 0 5.93 0 0
"585" "Atad2" 213.83 185.79 165.64 189.05 292.74 343.97 662.75 406.1 577.94 498.87 455.07 1.17701605131464 4.48e-10 1.61576217214724 1.44e-07 1.4035063621056 1.18e-05 1.27093092924875 8.03e-05 6.12 8.12 8.9 9.22 8.34
"586" "Vdac1" 341.32 360.48 304.67 396.03 573.5 687.4 1232.41 762.92 873.93 974.41 1032.37 1.21520183544708 4.53e-10 1.31758886171926 0.000101277300557202 1.47460007343043 6.94e-06 1.55795935254106 8.84e-07 5.23 9.07 10.4 11 10.4
"587" "Cks2" 38.29 63.68 19.29 51.09 88.25 146.51 225.49 209.85 231.07 120.06 150.07 1.95903510841564 4.53e-10 2.42298866702551 4.57e-07 1.47841427437227 0.0122338015936162 1.80029430265712 0.000837636782353635 6.67 8.26 9.25 8.8 9.13
"588" "Haus4" 70.79 75.26 105.7 96.63 115.2 160.83 357.57 331.65 358.61 256.2 142.31 1.47024084592218 4.77e-10 2.04175391571777 2.62e-08 1.55660867243461 0.000157686562358706 0.708375239107937 0.18910135980194 0 8.14 9.77 10.2 8.69
"589" "Spon1" 51.92 44.36 44.72 43.42 26.98 19.18 5.42 5.6 12.12 27.75 423.03 -1.68941259671698 4.83e-10 -1.92753351787513 0.00206622018484789 -0.732435445223246 0.321819917285776 3.19776485671567 3.69e-33 0 6.69 0 0 9.58
"590" "Nop2" 241.78 290.06 299.69 337.27 539.46 554.97 763.14 865.39 746.98 828.84 683.92 1.22014770624279 4.91e-10 1.35411343798276 7.31e-05 1.50413745134193 5.36e-06 1.22687140083928 0.000395516107113556 7.6 8.72 10.4 10.2 9.89
"591" "Mei4" 3.16 1.95 4.37 3.19 3.28 16.61 30.77 27.44 7.09 2.9 43.96 2.62390602388853 5.03e-10 1.16244100809871 0.24054216536961 -0.127291719125875 1 3.79477486180842 2.16e-12 0 6.98 6.35 0 7.99
"592" "Setbp1" 153.26 109.54 144.75 99.73 89.62 62.95 21.6 22.93 18.41 12.05 25.39 -1.36385450557473 5.03e-10 -2.78422075015567 3.43e-07 -3.39567723038825 1.91e-09 -2.32044998185807 1.1e-05 0 0 5.6 0 6.54
"593" "Erh" 142.81 177.98 65.93 140.82 228.52 453.61 389.19 402.93 503.38 622.49 582.22 1.48262880069889 5.3e-10 1.93236740897297 2.12e-07 2.23877017282231 1.86e-10 2.14228391037934 1.44e-09 6.07 8.9 10.3 10.9 9.66
"594" "Fabp5" 40.18 61.51 10.53 28.53 45.12 99.08 210.29 153.36 244.51 126.35 641.6 1.85126751915676 5.71e-10 2.79675854759751 4.15e-11 1.84429074197718 0.000281589835056119 4.18853921948733 4.19e-35 4.9 8.15 9.97 8.98 10.4
"595" "9330182L06Rik" 0.52 0.26 0.19 0.19 1.58 5.16 10.34 4.25 10.42 66.51 0.25 4.200687255213 5.73e-10 5.16715856715094 8.56e-10 7.84137456046089 8.99e-47 -0.214124805352847 0.956406034665848 0 0 7.53 9.15 0
"596" "Fmn2" 3.94 2.6 3.19 0.69 3.83 11.44 24.76 9.04 0.37 39.66 0.18 2.23548599378972 6.05e-10 -2.81568619664956 0.219043858275965 3.92832939995034 9.97e-20 -3.8552145608362 0.105779716199717 0 0 0 7.7 0
"597" "Impdh2" 188.07 334.43 182.85 340.39 388.7 637.22 599.32 843.7 687.83 701.41 964.96 1.23936757451383 6.74e-10 1.39559974398852 5.15e-05 1.42380570222521 3.36e-05 1.88401684330011 1.07e-09 7.03 8.15 9.22 9.69 8.51
"598" "Selenbp1" 10.75 20.56 13.24 10.52 37.97 43.1 71.23 79.2 18.6 36.26 34.72 2.07167367988408 6.84e-10 0.434036012844516 0.56430132012167 1.39711231659328 0.0329995710201203 1.3345003392936 0.0400937827683452 0 0 6.12 6.97 5.95
"599" "Dnmt1" 386.69 434.79 415.01 420.88 506.05 750.09 1703.56 947.37 1178.45 915.61 802.17 1.23719139007428 6.97e-10 1.50799483498775 5.57e-06 1.14390941139871 0.00146959303790185 0.953084204214022 0.00964570220649739 0 7.39 8.82 8.83 7.75
"600" "Rsph1" 4.15 5.13 2.3 2.29 9.43 16.06 54.87 43.1 51.84 255.04 0 3.15400400369939 7.09e-10 3.90209793056102 2.49e-08 6.20068384166687 1.89e-38 NA 0.417786375053103 0 0 7.51 7.09 0
"601" "Tmem48" 72.68 68.16 64.43 80.52 126.68 134.93 258.33 217.47 355.26 332.07 254.39 1.36751154455065 7.7e-10 2.31391982322642 9.1e-13 2.21653195583069 1.67e-11 1.83208652342902 1.65e-07 0 0 0 0 0
"602" "Nsun2" 350.42 334.75 336.85 399.28 552.34 619.92 1198.28 887.66 1127.39 584.8 960.94 1.19686406170898 8.11e-10 1.66577557321091 1.19e-07 0.71880411373527 0.0770977118089688 1.43530715601959 9.22e-06 7.75 9.22 11 10.6 10.7
"603" "Ncl" 680.57 565.3 520.33 409.99 950.84 1270.91 2645.17 582.14 2119.29 1639.66 997.58 1.32420285491927 8.12e-10 1.96177649542366 2.4e-09 1.59159216681822 3.12e-06 0.87469992496979 0.0183029154930868 9.05 10.4 11.9 12.3 11.5
"604" "Igj" 5495.65 5464.53 4680.87 6770.89 3064.07 1820.42 1151.06 1334.46 234.61 359.38 415.86 -1.60452905342748 8.14e-10 -4.57785921714956 5.35e-09 -3.96261360207409 1.83e-07 -3.75202580087764 4.08e-07 0 0 0 0 0
"605" "Bcl2" 462 433.77 445.4 419.35 286.05 218.57 75.27 112.05 67.26 110.69 31.5 -1.34728276832765 8.27e-10 -2.71010902762387 1.66e-06 -1.99140482012356 0.000325276952854923 -3.80450597787581 1.64e-10 5.08 6.51 8.84 9.67 7.9
"606" "Ccdc135" 0 0.42 0.95 0.31 0.32 0 31.38 1.67 17.88 0 0 4.31201854840356 8.44e-10 5.41181359840456 3.43e-10 NA 1 NA 1 0 0 0 0 0
"607" "Dstn" 231.42 243.91 171.88 264.53 471.96 505.67 500.98 649.22 295.73 252 149.05 1.2226885171168 8.51e-10 0.375658132358806 0.42642617331724 0.144801262612695 0.792280497932528 -0.612826095783415 0.386089888278553 0 7.59 8.56 8.91 7.54
"608" "Gsg2" 40.82 41.22 47.3 48.25 80.97 103.72 166.47 141.93 199.89 299.17 118.64 1.47330064831379 8.92e-10 2.17065595286775 1.54e-09 2.75241516614944 1.66e-17 1.41804015633309 0.000746338834471074 0 6.97 8.45 8.91 7.61
"609" "Ccdc85c" 2.34 4.63 5.77 4.58 13 22.8 53.03 35.03 68.59 129.98 78.67 2.8381995159908 1.07e-09 3.98555932560403 2.1e-11 4.90777881791818 1.68e-22 4.18337465353937 2.13e-13 0 6.62 8.67 9.76 8.89
"610" "Cecr2" 204.28 163.09 163.19 142.01 199.23 333.13 625.59 335.93 125.9 705.4 52.46 1.15130793038588 1.22e-09 -0.417406145797926 0.640190225832495 2.06875714690931 8.51e-13 -1.68039471613932 0.00154437547039502 5.89 8.43 8.81 10.2 8.88
"611" "Lamb2" 2.58 2.12 3.65 2.99 8.61 7.2 23.77 16.02 26.16 25.88 36.62 2.29366424266864 1.24e-09 3.20594190055585 6.13e-10 3.19041697705028 8.08e-10 3.69121115085511 3.57e-15 0 0 0 0 0
"612" "Ccr2" 44.76 68.89 46.74 90.89 32.86 23.13 4.44 15.85 51.07 96.57 63.58 -1.71991909933921 1.25e-09 -0.298747883939549 0.801546911911016 0.620351134546869 0.23088755680744 0.0173490734860114 1 0 0 0 0 0
"613" "Stap1" 1817.28 1541.35 1601.55 1462.29 975.24 734.33 294.91 522.35 203.79 355.96 104.04 -1.34579964021906 1.3e-09 -2.97797308103623 7.85e-08 -2.17334120953848 5.36e-05 -3.94791803666276 1.24e-11 0 7.77 6.85 8.38 0
"614" "Myo1f" 116.61 138.04 138.04 159.8 82.28 51.43 23.78 44.18 47.5 72.17 185.31 -1.4539518644723 1.31e-09 -1.5399489335841 0.00492965106853851 -0.936477192264058 0.100853850835809 0.423992384384797 0.395046181741883 0 0 0 0 0
"615" "Vav3" 112.92 114.05 121 103.49 57.76 44.33 27.43 32.61 8.47 18.05 8.92 -1.47744710144556 1.34e-09 -3.73609238874718 8.86e-10 -2.64452742630484 3.26e-06 -3.66141064815907 1.08e-09 0 6.64 0 0 0
"616" "Zik1" 14.99 8.83 11.5 12.9 22.25 30.45 55.47 51.56 37.11 47.18 10.89 1.72793174471444 1.36e-09 1.622176350095 0.00123969072395559 1.96854376763694 2.26e-05 -0.146627696885619 1 0 0 6.33 6.49 0
"617" "Sephs2" 179.62 232.96 181 260.76 273.09 375.22 635.9 686.09 540.62 442.53 415.13 1.20553307698075 1.4e-09 1.33980455411674 0.000123937064252834 1.05096493109951 0.00554064980862197 0.958752863643402 0.0115475276232951 0 7.55 9.32 9.62 8.58
"618" "Nucks1" 582.19 582.89 574.95 714.69 1010.66 1247.08 2313.27 1509.66 1348.95 1141.35 902.41 1.3086718245808 1.46e-09 1.13627840301008 0.0030402944325042 0.895182796730627 0.0303266188652941 0.556296488546836 0.229513137222684 0 7.1 8.57 9.21 7.99
"619" "Chchd4" 105.76 96.89 87.44 116.05 222.46 235.85 317.9 325.36 362.21 344.43 280.1 1.4395121471511 1.54e-09 1.83484925447993 1.46e-06 1.76223368485521 5.55e-06 1.46396486070627 0.000311786744099143 5.35 9.25 10.6 10.7 9.87
"620" "Palm" 20.51 17.57 15.15 13.37 19.31 36.4 100.58 65.92 30.93 18.44 181.42 1.73832966062647 1.54e-09 0.89348465613064 0.14253542512027 0.147316478470714 0.783252385298152 3.44573942698709 5.28e-22 0 0 8.2 6.97 8.97
"621" "Slc41a2" 47.37 42.75 61.23 76.39 31.05 19.87 7.27 15.44 4.95 8.36 427.42 -1.62902210045732 1.63e-09 -3.52381537166295 2.15e-07 -2.76774095454904 1.37e-05 2.90826670963446 4.87e-24 0 0 0 0 7.37
"622" "Scd2" 254.4 273.89 314.94 220.83 654.33 617.09 586.02 558.83 778.84 300.2 902.28 1.1832021704623 1.68e-09 1.54981938209772 1.09e-06 0.174416378542385 0.753162888118251 1.76206760881873 6.47e-09 0 7.59 9.13 8.35 9.03
"623" "Spire1" 11.28 8.31 7.27 7.75 16.35 22.47 47.55 30.28 48.87 58.27 81.14 1.75292546070611 1.68e-09 2.49776016308123 4.26e-09 2.75156436918187 1.12e-11 3.22922436104083 3.66e-18 5.9 5.82 6.74 6.8 6.98
"624" "Tagln2" 576.02 604.11 691.49 660.01 968.32 1189.96 2149.27 1427.3 915.22 1126.19 743.44 1.17968918279256 1.69e-09 0.532123915315214 0.249606982701922 0.831383676658262 0.0362649850729472 0.232221649079929 0.691388038321225 5.9 9.03 9.89 10.4 9.8
"625" "Hmgn5" 31.67 16.28 20.59 17.2 30.68 42.98 196.79 24.51 85.99 69.32 27.61 1.78247899927684 1.7e-09 2.00420047766857 3.47e-05 1.6933032373432 0.000964525427146756 0.365222470771096 0.582866680656339 0 7.03 7.31 8.03 7.29
"626" "Banf1" 269.88 273.28 275.01 282.75 364.16 431.5 1312.8 639.09 519.3 354.36 346.49 1.31943609850634 1.71e-09 0.915930493422252 0.0366930515493933 0.364578030302205 0.507699842650409 0.332175983537694 0.541284462288604 7.78 8.19 10.4 9.71 10.5
"627" "Tubb2c" 463.56 636.01 432.2 811.08 700.99 1045.99 1714.47 1803.11 1327.83 1065.78 785.5 1.16804836989992 1.73e-09 1.18080586331002 0.000779369807992153 0.863645076222203 0.0273136168834425 0.423418591426188 0.372433332111404 0 0 0 0 0
"628" "BC055324" 59.36 60.75 48.75 63.97 74.76 112.67 236.78 168.76 201.79 221.42 107.77 1.34868215608902 1.78e-09 1.79357772076519 5.5e-07 1.9275085804111 3.53e-08 0.888678669509789 0.0420133981999442 0 5.24 7.45 8.29 7.4
"629" "Smarca4" 566.29 602.06 578.39 502.02 726.85 1133.89 2050.12 1479.49 1013.8 874.3 640.16 1.26124925442782 1.78e-09 0.850643372035385 0.0309812153692348 0.63707060711147 0.131119393664471 0.187374741904148 0.703111228989462 8.23 9.18 10.1 10.5 9.43
"630" "Igsf8" 67.11 122.54 101.94 116.76 139.65 212.44 348.86 313.5 251.74 649.53 819.98 1.31281962677777 1.9e-09 1.3021282427346 0.000906212322225096 2.66958993361436 2.91e-19 3.00578249391346 2.27e-26 7.94 10.3 11.4 11.9 11.5
"631" "Trim16" 12.09 7.66 4.81 7.28 10.56 18.11 52.45 34.6 1.86 3.14 17.72 1.86172598738595 1.93e-09 -2.09746580943562 0.166195229708742 -1.34200387165202 0.418727809123714 1.15453826801137 0.0538530908956955 0 7.37 0 7.86 7.8
"632" "Wee1" 45.93 64.63 60.29 52.63 101.06 94.99 223.08 143.84 183.38 133.22 128.35 1.33291231945084 1.94e-09 1.7146905772459 1.99e-06 1.25366496162041 0.00181542149593195 1.19993757050875 0.00274337532966844 7.47 8.07 9.71 9.93 9.21
"633" "Plk4" 60.96 73.41 66.16 76.22 93.29 136.61 279.07 167.48 401.46 225.5 139.88 1.28939998390909 2.02e-09 2.53667293306095 2.51e-17 1.70454411647383 1.01e-06 1.01560638414144 0.0123811834206816 0 6.79 8.89 8.67 8.09
"634" "Thyn1" 33.87 34.73 35.21 47.87 81.63 122.83 154.62 193.44 225.37 206.49 324.45 1.86499581846492 2.02e-09 2.57126461540821 1.39e-08 2.4450410464376 1.44e-07 3.09696529667224 2.55e-14 0 0 8.04 7.64 7.73
"635" "Cmya5" 22.33 15.02 17.7 21.1 7.79 7.27 3.21 4.57 17.2 6.19 30.22 -1.73728138601181 2.09e-09 -0.146435471785194 1 -1.62083272216039 0.0127046320767274 0.666659623790174 0.150214256466373 0 0 0 0 0
"636" "Depdc1a" 4 12.94 5.37 8.8 14.58 25.29 48.47 34.86 93.61 40.12 40.5 1.98555195604788 2.09e-09 3.58928426078888 1.49e-18 2.3669432110778 4.15e-06 2.38054351312497 2.39e-06 0 0 7.1 6.56 0
"637" "Ppp1r14b" 57.84 74.08 77.67 128.29 141.24 232.58 325.69 332.43 253.22 192.2 221.56 1.61077622945132 2.11e-09 1.58388040107992 0.00082991606755758 1.1860973799715 0.0281967855865186 1.39118648747371 0.00467558419599526 6.74 8.64 10.1 10.1 9.89
"638" "Slc25a4" 581.54 631.3 520.97 695.96 1067.4 1170.19 1569.61 1650.16 1393.77 1264 1331.46 1.16738345962939 2.11e-09 1.1981727512489 0.000552610799297355 1.05717670752915 0.00344060267266736 1.13218933146731 0.00106567590888796 0 6.64 8.19 8.41 8
"639" "Nefh" 2.42 3.89 5.36 5.11 12.36 15.85 34.25 18.5 27.79 81.54 26.97 2.27046657425449 2.12e-09 2.72782311876074 1.48e-06 4.28076524104872 1.62e-24 2.68461280579578 1.89e-06 7.04 8.37 9.25 10.5 8.9
"640" "Cenpp" 48.14 41.93 28.78 42.89 82.39 114.19 205.41 147.17 285.99 172.86 162.1 1.76355002897687 2.18e-09 2.82228818567145 2.88e-12 2.09592754976382 7.7e-06 2.0032075742877 1.87e-05 5.78 9.47 10.2 9.73 9.13
"641" "Ryk" 10.72 12.06 8.74 11.67 33.02 28.9 48.83 44.99 121.79 115.61 81.31 1.85037030972286 2.26e-09 3.4956264588553 4.17e-20 3.42049697139245 5.21e-19 2.91273547810734 3.42e-12 0 0 7.76 7.93 6.1
"642" "Serpina3g" 599.17 1931.64 722.64 593.16 567.88 430.76 126.99 298.13 83.03 110.87 226.57 -1.43388159015766 2.33e-09 -3.53381105661247 2.51e-09 -3.1166466164762 9.61e-08 -2.08555881260207 0.00021723484421439 0 0 7.31 0 0
"643" "Txn1" 375.84 482.98 243.66 381.22 601.85 714.74 1069.75 956.46 1035.95 976.67 976.46 1.17185762843954 2.43e-09 1.48175496067074 5.84e-06 1.3967436752574 2.74e-05 1.39643343890882 1.95e-05 0 8.08 10.2 10.4 10.3
"644" "Nab2" 154.81 121.99 181.23 173.84 83.78 55.2 26.55 58.66 12.64 40.12 7.73 -1.49490584285229 2.45e-09 -3.64355940235833 6.15e-09 -1.97723425992326 0.000455575330116772 -4.35301554661059 3.62e-11 0 5.58 7.3 7.15 6.05
"645" "Dnase1l3" 110.71 115.92 138.94 74.29 67.22 44.04 25.26 17.58 78.23 33.34 59.79 -1.51317754952157 2.49e-09 -0.49125054129427 0.547276612320671 -1.7217184019373 0.00313607331681123 -0.879068295363499 0.162110225213033 0 0 0 0 8.35
"646" "Tnks1bp1" 79.03 86.46 87.1 74.5 25.45 26.36 34.76 26.05 18.25 23.39 14.86 -1.53822459711746 2.5e-09 -2.16371928401475 0.000155041876234055 -1.80572388631707 0.00147150248134886 -2.4601816321309 1.47e-05 0 0 0 8.24 0
"647" "Gimap3" 1273.3 1078.01 1455.94 1626.14 782.41 639.95 228.08 610.43 191.12 377.04 129.29 -1.26497456553139 2.51e-09 -2.82930194103727 2.6e-07 -1.84906311347825 0.000421794331454165 -3.39317000645356 1.65e-09 0 0 5.95 0 0
"648" "Neurl3" 551.38 443.45 557.2 520.6 251.26 245.43 158.82 180.16 70.49 84.3 46.21 -1.31045734351985 2.59e-09 -2.87790017799859 1.09e-07 -2.61978615223353 9.48e-07 -3.48711369389644 3.85e-10 0 6.77 7.22 7.86 0
"649" "E330016A19Rik" 9.97 13.74 9.82 12.19 22.17 35.54 55.65 39.63 22.61 41.38 71.67 1.74254004737775 2.97e-09 0.984135588537051 0.10758452905376 1.85610824164553 0.000146426370566764 2.64854395096301 9.1e-11 0 0 0 0 0
"650" "Fam195a" 4.44 4.39 1.09 4.35 23.52 20.34 49.34 53.96 70.93 16.34 58.8 3.36632834149721 3.1e-09 4.31341061277905 4.38e-09 2.19542264866992 0.037343458583958 4.04283082024796 1.08e-07 6.56 6.94 9.33 8.73 9.05
"651" "Pebp1" 186 327.4 162.3 275.98 360.38 618.85 621.49 648.15 639.6 868.43 488.08 1.2406518083129 3.15e-09 1.42669338631528 5.44e-05 1.86793301235341 7.72e-09 1.03664108328521 0.00635933688822178 0 6.06 8.27 8.62 7.76
"652" "4930579G24Rik" 14.72 12.13 13.14 25.66 26.46 35.83 90.67 91.85 67.97 46.26 44.57 1.89879557421704 3.22e-09 2.05010311169655 0.000134048038378017 1.49497025485594 0.0161473677013666 1.4412779498324 0.0196440928816006 0 0 8.36 7.88 6.84
"653" "4632434I11Rik" 21.36 17.66 17.85 19.28 38.96 40.01 85.9 65.4 81.11 52.5 68.54 1.59641052457929 3.23e-09 2.09103575764401 5.75e-07 1.46347338606619 0.00242015708214257 1.84810215514452 2.05e-05 0 7.68 9.03 8.9 8.15
"654" "Psrc1" 6.93 8.91 13.32 9.16 15.22 25.61 71.08 65.72 170.96 22.32 55.08 2.2127057934076 3.25e-09 4.15748934692363 2.62e-22 1.22023946609301 0.136404708261442 2.52343099839878 1.29e-05 0 0 9.31 7.29 7.85
"655" "Tnfaip3" 301.93 278 248.65 262.26 155.9 119.46 53.61 99.44 70.64 77.14 203.81 -1.34837544734181 3.4e-09 -1.94881035529275 0.000269121068435329 -1.82181655231246 0.000666622928643587 -0.420142763877879 0.604955861827752 6.3 7.5 8.53 5.52 8.36
"656" "Mki67ip" 274.89 241.53 273.71 356.16 470.07 569.18 750.84 829.74 620.7 795.35 543.09 1.19250112093502 3.44e-09 1.11499597322468 0.00287498024311873 1.47268969669114 1.56e-05 0.922291126245803 0.017924017560462 6.22 8.46 10.1 10.8 9.62
"657" "Snora7a" 1835.37 1786.95 518.77 742.12 6958.41 3788.29 606.56 861.17 1822.64 1989.31 3583.17 1.32268481340307 3.44e-09 0.578199812919177 0.138453474057867 0.704438291394553 0.0679442568645574 1.55340667074211 5.48e-06 8.03 9.49 11.2 11 10.7
"658" "Cdkn3" 29.69 37.08 25.39 45.87 67.4 91.27 239.79 141.08 132.59 188.27 87.8 1.96674805881449 3.5e-09 1.94199010854177 0.000724479054620144 2.4478212688543 1.41e-06 1.34731098259832 0.0350178730721408 0 0 6.98 7.44 0
"659" "Csrp2" 118.22 108.83 75.28 115.66 126.47 205.41 439.22 379.46 363.49 116.21 39.49 1.46079588716297 3.6e-09 1.79844724694406 8.6e-06 0.153265791942257 0.794707810672769 -1.40390915474697 0.114851017670664 5.66 7.69 9.29 8.32 8.22
"660" "Polh" 159.66 168.05 146.29 225.39 244.11 301.21 512.04 536.13 465.01 375.47 235.85 1.18802089207217 4.12e-09 1.41116457330867 4.72e-05 1.10260047293606 0.00353929699230726 0.431772432589313 0.382507238046979 5.27 7.6 9.1 9.35 8.86
"661" "1100001G20Rik" 88.25 111.8 30.56 80.95 240 357.7 169.97 335.6 16.52 83.7 138.93 1.82420397233609 4.18e-09 -2.2372244313052 0.120621761759415 0.103789504713063 0.815898469446755 0.834848139700206 0.170819716380194 0 6.96 7.52 8.6 7.43
"662" "Lancl2" 51.2 43.11 50.75 64.23 81.74 110.65 181.35 153.18 105.51 91.44 48.64 1.3320805598803 4.22e-09 1.01187636037906 0.0241205815360701 0.805393928247076 0.0978662375767858 -0.105288246523817 1 0 6.87 7.78 7.76 7.54
"663" "Hnrnpab" 732.38 881.36 722.94 835.92 1059.19 1488.87 2685.55 1834.92 2171.76 1690.6 1131.58 1.15574457917943 4.27e-09 1.45319904214688 9.27e-06 1.09186971665812 0.00211007270299305 0.512672944929107 0.221797138622503 7.68 9.12 10.5 10.6 9.8
"664" "Acer2" 4.02 4.55 2.97 2.95 18.26 16.29 16.81 16.92 23.81 21.67 47.6 2.23640546347081 4.66e-09 2.7165100257134 1.32e-06 2.58064155853674 7.63e-06 3.71590397863838 1.1e-15 0 0 6.26 6.91 6.97
"665" "Adam11" 3.31 4.68 22.91 9.38 2.51 0.61 1.49 1.73 1.89 6.97 94.5 -2.66750893786738 4.73e-09 -2.41360554378571 0.0179055754480317 -0.530833122138362 0.60664994879707 3.23025064598901 1.32e-17 0 0 0 0 6.76
"666" "Fam134b" 594.82 529.62 558.1 574.05 328.48 249.55 140.94 205.31 224.46 125.7 47.34 -1.28774244813002 4.78e-09 -1.32961404213818 0.0132781878448032 -2.16608776410229 4.51e-05 -3.57494080267554 2.35e-10 6.28 6.26 7.74 6.67 6.04
"667" "1110038B12Rik" 119.56 116.18 140.09 117.99 243.34 339.95 508.17 381.46 1090.52 345.03 403.38 1.57662190136348 4.82e-09 3.14295905629438 2.18e-20 1.48273654051904 0.00195815767759529 1.70815428774291 0.00010884086939119 0 8.24 10.5 9.65 8.93
"668" "Cct8" 677.5 638.41 679.94 740.72 1075.04 1150.82 2158.58 1690.2 1426.62 1251.69 1215.23 1.15043015275921 4.84e-09 1.06023234378763 0.0033319188399693 0.871508540829355 0.0236302441993271 0.828860630363503 0.0287755848567075 7.14 8.48 10.1 10.1 9.39
"669" "Nudt5" 231.1 202.2 187.55 235.41 335.95 412.02 590.43 630.49 555.45 633.41 482.37 1.20126167453178 5.21e-09 1.37560811837538 0.000101185996373042 1.56509071232879 4.09e-06 1.17209125275192 0.00129754030873746 0 7.68 8.89 9.23 8.7
"670" "Thbs1" 5.2 7.82 3.84 2.44 8.98 3.93 13.09 42.03 23.07 27 27.63 1.81757024161649 5.3e-09 2.25741715652754 5.23e-06 2.48435855978275 1.63e-07 2.51763471465705 6.57e-08 0 0 0 0 0
"671" "Slamf1" 253.91 269.27 282.49 313.28 162.21 127.76 42.96 111.13 66.84 39.26 11.75 -1.33331904398305 5.35e-09 -2.0652900276643 0.00010704045879756 -2.83294158825932 2.85e-07 -4.57334100427312 1.88e-13 0 0 0 0 0
"672" "Hspa9" 523.77 526.91 520.64 617.47 846.48 900.79 1768.81 1334.5 1223.98 1007.93 945.16 1.14802372140241 5.56e-09 1.16144644032844 0.000958579109922167 0.881261904142177 0.021990079345606 0.788496935535968 0.0407968923688402 7.4 9.54 10.6 10.9 10.1
"673" "Fam70a" 13.75 9.41 9.37 15.52 24.27 26.34 73.59 39.14 351.84 138.09 7.85 1.76526979670519 5.6e-09 4.87231117319386 1.77e-58 3.52300051228393 4.36e-22 -0.613771871882123 0.73427591425779 0 0 0 0 0
"674" "Idh2" 188.19 214.86 183.07 220.43 278.36 353.78 683.3 532.43 293.46 261.89 890.89 1.19602738744946 6.04e-09 0.541399898174959 0.25224193207041 0.377197000580988 0.453229447167388 2.14348333791841 1.39e-12 0 6.22 7.74 7.03 8.3
"675" "Il2rb" 63.18 85.95 82.74 123.3 49.84 30.79 10.99 25.63 50.09 70.05 45.58 -1.5989218045581 6.1e-09 -0.825915210590298 0.215110530370647 -0.342052771530019 0.6838538510868 -0.962036897582903 0.126488508408056 0 0 0 0 0
"676" "Pipox" 3.4 1.35 4.53 4.5 9.27 16.96 35.97 34.75 78.16 100.82 0.66 2.81466501028986 6.38e-09 4.50385457926409 9.9e-16 4.87113406630507 1.4e-20 -2.38396605334584 0.61346452500676 0 6.19 6.12 8.15 0
"677" "Padi4" 6.41 6.33 3.04 5.37 18.35 17.69 35.97 27.97 2.74 93 84.22 2.24098186367621 6.55e-09 -0.948409865046785 0.873339628094338 4.13657305287544 1.15e-20 3.99350521216178 1.45e-18 0 6.08 6.2 8.86 8.97
"678" "2610318N02Rik" 16.22 16.04 16.92 14.7 38.27 47.53 103.21 78.65 202.86 70.2 70.25 2.0669653360835 6.78e-09 3.6670482042033 3.63e-17 2.13610671778069 0.000308288027463159 2.13713391258442 0.000256902625760534 6.08 8.03 9.43 9.73 9.07
"679" "Ggnbp1" 19.01 9.4 19.89 6.39 73.73 70.08 32.38 55.97 274.36 371.52 24.55 2.08577045730645 6.87e-09 4.32672119357047 3.08e-29 4.76409091010528 4.94e-40 0.844445962441765 0.279721648292408 0 7.36 9.73 10.3 6.85
"680" "Wnk2" 1.46 1.08 1.35 0.4 5.81 6.43 7.58 7.58 0.73 0.84 1.24 2.67512634034834 7.19e-09 -0.555009278619529 1 -0.352516414720785 1 0.20936247288733 0.835146447114689 0 5.42 6.14 5.97 6.27
"681" "Rnaseh2b" 92.86 103.29 93.09 127.76 186.96 206.51 352.46 320.33 243.3 318.71 149.39 1.35443998324892 7.59e-09 1.2226889366064 0.00473404927497325 1.61219690285741 3.59e-05 0.51903619529215 0.346730215842268 5.81 7.41 8.98 9.55 8.42
"682" "Timm8a1" 33.7 39.38 10.56 41.96 67.22 109.63 107.24 143.15 111.1 179.36 106.83 1.7662102602775 7.62e-09 1.82302235249746 0.000352031920675679 2.51402171902644 1.35e-08 1.76648037730523 0.000492951495157753 0 5.84 8.01 8.56 7.41
"683" "Bsn" 5.76 8.32 9.46 6.62 17.49 19.27 24.55 19.68 101.53 96.47 146.05 1.42510735789643 7.68e-09 3.75119774301441 5.55e-40 3.67744393781337 4.05e-38 4.27575402444788 2.13e-58 0 0 0 0 0
"684" "Ppp1r16b" 646.32 633.26 602.07 572.6 332.77 267.51 175.06 206.22 103.37 211.34 33.69 -1.32213385195068 7.78e-09 -2.5693927622033 9.27e-06 -1.53764446041439 0.00786814141793729 -4.18681797665236 2.13e-11 0 7.67 8.64 9.16 6.96
"685" "Ephx1" 798.79 712.33 756.16 852.35 441.4 352.71 138.7 352.73 110.8 71.39 42.17 -1.27900042930629 7.8e-09 -2.81534514360731 1.94e-07 -3.44950911790743 8.13e-10 -4.20901409826473 8.24e-13 0 6.69 8.42 6.6 6.19
"686" "Eif1ax" 446.14 435.96 274.62 487.25 630.78 752.96 1157.55 1130.92 1009.13 1268.07 681.14 1.15946459123433 7.81e-09 1.29592806770168 0.000204229844070687 1.62545041509948 6.14e-07 0.728839289929074 0.0665098856485584 0 6.34 8.07 8.93 7.55
"687" "1110067D22Rik" 7.98 9.86 9.08 13.66 26.66 25.69 47.65 42.86 88.57 78.85 38.31 1.81576125623483 7.95e-09 3.12604925377219 1.53e-14 2.95834188992121 1.65e-12 1.91695216066722 0.000212183298004996 0 0 0 0 0
"688" "Nacad" 111.1 102.28 142.42 132.43 57.35 56.19 33.22 46.1 24.64 33.15 25.11 -1.34000699312319 8.84e-09 -2.30848678518515 2.17e-05 -1.8804801708801 0.000412898783306546 -2.28122701260855 1.89e-05 0 0 0 6.53 0
"689" "Xrcc1" 225.9 210.06 238.08 267.37 296.5 396.25 665.55 737.1 445.93 669.64 168.88 1.15433058947844 8.92e-09 0.921994082476411 0.0204335652121331 1.50856252987277 7.79e-06 -0.478824694143189 0.474604477968391 6.08 6.95 8.38 8.51 7.39
"690" "Prim2" 142.19 144.91 117.01 138.66 180.27 267.29 412.97 395.87 610.65 596.46 315.96 1.21088296071379 9.19e-09 2.170004739923 2.83e-12 2.13608440839111 7.77e-12 1.21940094494169 0.000941516156087369 0 6.91 8.27 8.67 7.66
"691" "Znrf3" 7.85 10.61 11.32 12.51 29.86 31.43 50.11 18.15 49.33 76.28 67.55 1.61512055003866 9.53e-09 2.22214872696569 8.15e-08 2.85098828328395 6.47e-15 2.67563920918425 1.09e-12 5.01 7.99 9.23 9.97 9
"692" "Pacsin1" 57.95 64.71 63.67 53.31 32.94 21.05 10.33 13.42 4.32 9.81 11.17 -1.62413972582593 9.71e-09 -3.79369361600166 9.02e-08 -2.61047179194589 5.97e-05 -2.42316764768181 0.000138846352019242 0 0 0 7.28 7.54
"693" "Steap4" 14.62 18.26 14.49 10.16 2.04 2.64 0.73 1.51 10.37 15.92 17.89 -3.05547052724751 9.71e-09 -0.471898576071013 0.916752659181222 0.14652586565941 0.789667149740301 0.31483891716767 0.615919240934292 0 0 0 0 0
"694" "Ncs1" 1.8 0.3 2.21 1.1 5.66 6.94 14.31 12.59 2.39 0.55 17.98 2.86815215412501 9.84e-09 0.821382024153933 0.425978931870956 -1.29812507030216 0.963620151146097 3.73269252168763 1.63e-08 0 0 0 5.96 6.82
"695" "Nes" 0.2 0 0.15 0.43 0.9 2.2 7.81 3.21 2.56 68.55 1.15 4.17812215440893 9.94e-09 3.71459778113775 0.00164569950524188 8.45753873180434 2.58e-59 2.56008783208213 0.0686859878644237 0 0 7.65 8.66 6.76
"696" "Cirh1a" 146.1 126.93 147.99 174.6 264.59 262.96 448.23 400.89 406.38 364.54 337.69 1.20871867080963 1.03e-08 1.44843720338591 5.07e-05 1.2916849281039 0.000543320521626155 1.18130725930398 0.00168638461717132 7.92 8.67 10.6 10.7 9.82
"697" "Poc1a" 28.31 31.49 31.89 32.72 46.59 63.21 129.06 146.43 102.42 119.1 85.69 1.63084228901211 1.03e-08 1.71939501112178 0.00044053651413057 1.93707096012436 2.98e-05 1.46209630407185 0.00406878038232187 0 0 7.32 7.84 6.75
"698" "4933436C20Rik" 0 0 0.72 0.72 8.86 10.9 21.48 14.77 74.02 83.45 44.43 5.28154371150505 1.04e-08 7.68377441885791 1.61e-19 7.85677133280765 1.34e-21 6.94739342456769 4.65e-13 6.5 7.58 9.27 9.38 8.73
"699" "Hsd11b1" 304.41 239.23 243.05 156.24 153.12 102.02 28.77 37.99 21.08 94.67 409.1 -1.55053809715869 1.05e-08 -3.48320390188652 1.55e-07 -1.31617144673865 0.0425648159044457 0.795302863251676 0.0364705338375496 0 6.11 0 5.36 7.43
"700" "Srl" 4.61 8.88 5.56 7.83 11.2 15.63 43.19 24.49 28.58 23.66 61.35 1.81393384928193 1.11e-08 2.08847277831706 5.46e-05 1.81591693556103 0.000819522904774172 3.19053020577151 4.19e-15 0 0 0 0 0
"701" "Slc34a1" 1.96 0.39 0 1.73 6.23 6.4 13.56 12.31 4.3 5.41 0 3.23821738849813 1.11e-08 2.07576750761796 0.0504342402380209 2.40705944185532 0.0165919916999981 NA 0.703183161823014 0 0 0 0 7.46
"702" "Myof" 144.57 162.47 154.46 126.83 119.83 71.23 26.88 26.64 15.47 19.73 19.3 -1.26631916830501 1.11e-08 -3.24908050183034 8.24e-09 -2.89816274255582 1.58e-07 -2.92995285112393 8.23e-08 0 0 0 0 0
"703" "Ncapd3" 145.54 132.83 131.17 134.5 204.64 249.44 409.03 308.72 292.07 345 382.77 1.10697865673648 1.13e-08 1.10260145111451 0.00161042014713427 1.34288363379731 5.06e-05 1.49276503342513 2.19e-06 0 6.8 8.6 8.91 8.31
"704" "Il24" 137.47 154.11 89.55 80.22 41.77 55.78 6.81 11.53 1.08 7.96 2.1 -1.99310557328133 1.14e-08 -6.73868653407095 1.51e-08 -3.85694941569077 1.08e-05 -5.77932851856829 5.04e-08 0 0 0 0 0
"705" "Cep164" 76.6 92.93 93.81 86.57 140.74 171.1 225.91 239.7 178.18 147.97 278.69 1.15176599881641 1.16e-08 1.02635151351011 0.00673827112187426 0.758320812399889 0.0692835826832847 1.67167734072451 1.55e-07 0 0 8.23 8.52 7.95
"706" "Hist1h1c" 2627.98 3414.07 1316.99 1965.35 2557.81 4789.65 5664.65 7215.13 6464.37 6535.96 3627.54 1.11721822537447 1.17e-08 1.47150042814138 4.45e-06 1.48738980664161 3.51e-06 0.637982175034586 0.0618820234116214 0 7.97 9.2 8.45 8.48
"707" "Rgs8" 0 0 0 0 0 0.89 6.94 0.93 1.45 0.19 0 NA 1.22e-08 NA 0.000803034594943624 NA 0.394873980101603 NA NA 0 0 0 0 0
"708" "Tlr1" 855.04 706.3 812.33 770.4 477.52 379.54 149.74 318.24 81.26 310.73 67.92 -1.24659742623545 1.22e-08 -3.27394416351746 5.39e-09 -1.33889989736585 0.0126345542713141 -3.53265306919551 3.99e-10 0 0 0 9.62 0
"709" "Sdhd" 487.89 569.77 399.96 543.58 746.21 930.17 1224.33 1395.35 1148.51 1107.46 1202.07 1.10214878511145 1.22e-08 1.19889806077681 0.000437830495543267 1.14638923402888 0.000928313249432846 1.2646555533416 0.000125706789352727 0 6.96 8.61 9.04 8.16
"710" "Ncf1" 1190.22 1338.8 1249.06 1216.1 707.15 621.54 238.98 498.39 85.08 131.46 977.1 -1.27336566794494 1.24e-08 -3.87528397622595 1.66e-10 -3.24755202447524 2.89e-08 -0.3536696941822 0.703111228989462 0 0 8.36 8.39 8.8
"711" "Plxnb2" 122.9 136.04 132.94 121.02 222.58 231.08 409.12 242.93 607.23 440.12 422.37 1.10822357603213 1.24e-08 2.24356549707661 2.57e-15 1.77921936107439 4.75e-09 1.7198297956059 1.41e-08 0 8.27 9.93 9.72 8.72
"712" "Traf1" 161.58 167.99 183.83 192.15 125.42 80.33 18.95 44.28 31.63 108.94 198.81 -1.39124942025926 1.25e-08 -2.47938286451371 2.12e-05 -0.695214553190664 0.28137929283334 0.17264199976648 0.813916302164045 5.94 8.5 9.53 9.97 9.29
"713" "Hmgn2" 140.64 215.26 130.21 267.2 223.06 425.28 545.82 595.27 486.53 445.61 289.28 1.24818452266236 1.29e-08 1.3692850851165 0.000337035456027747 1.24253792790429 0.00165517469821123 0.619222901995741 0.19893226106802 0 6.6 8.31 8.45 7.47
"714" "Klra17" 5.13 6.09 19.71 27.11 0.78 1.76 0 0 4.1 9.44 413.6 -4.51414711729458 1.32e-08 -1.8233517045613 0.318020609886035 -0.620188754704903 0.765635296410145 4.83311676113555 4.92e-36 0 0 0 0 5.53
"715" "Lta" 89.96 76.86 148.39 82.04 43.62 29.26 7.69 29.39 24.41 10.44 11.85 -1.85306840761029 1.33e-08 -2.02450301934209 0.0055570876726207 -3.24985360255336 3.2e-05 -3.06708825533762 5.15e-05 0 5.99 8.29 8.21 0
"716" "Fut10" 0.39 1.52 1.14 0.85 2.62 4.63 22.53 7.34 6.54 0 0.37 3.25065068137796 1.35e-08 2.74581651174847 0.0049721245553932 NA 0.593140245820552 -1.39787694812066 1 0 0 5.7 0 0
"717" "Sorl1" 1629.84 1423.7 1683.48 1462.89 891.16 688.07 309.76 383.02 408.4 464.35 541.08 -1.44827808828138 1.38e-08 -1.92419250167179 0.00574503678714685 -1.73896273296987 0.0125825578936641 -1.51833345207828 0.0276176753981149 6.21 7.33 8.03 8.14 7.91
"718" "Ccne1" 114.25 97.09 121.34 115.11 169.17 191.49 375.17 332.11 256.44 293.06 121.45 1.25393637891915 1.39e-08 1.19579900339781 0.00315707315907968 1.38837375640048 0.000308288027463159 0.117540179540075 0.911880365553226 6.26 7.33 9.08 9.4 7.96
"719" "Ceacam16" 75.36 80.36 94.41 76.99 39.14 25.38 9.76 14.5 38.35 20.38 6.44 -1.88151335420127 1.39e-08 -1.09252148513607 0.167658900254084 -2.00459401136055 0.00703236690577896 -3.66661546941175 7.21e-06 0 0 0 0 0
"720" "Fam167a" 110.1 107.45 121.57 95.24 77.49 47.28 15.96 25.11 1.71 6.56 3.32 -1.38909923061846 1.39e-08 -5.98875111684198 3.87e-15 -4.04905162710979 2.6e-10 -5.03156420038095 3.66e-13 0 0 0 0 0
"721" "Wdr62" 19.35 13.85 17.3 15.32 21.58 37.4 92.88 34.27 94.29 82.19 62.41 1.49971267279092 1.39e-08 2.51857874639556 9.9e-12 2.32043684642241 1.33e-09 1.92325118522986 2.78e-06 6.39 8.07 9 9.27 8.87
"722" "Tomm5" 197.22 252.46 182.1 174.44 325.13 512.73 582.48 597.4 797.97 989.46 782.98 1.32349480714959 1.39e-08 1.98516093602388 2.31e-08 2.29546781318206 7.38e-12 1.95780188384907 2.64e-08 6.66 9.17 10.7 10.9 10.2
"723" "Peg13" 247.22 184.78 252.86 211.05 127.49 117.04 68.81 63.51 80.13 113.56 36.65 -1.24936341876515 1.49e-08 -1.48293942963318 0.00477544496297187 -0.97989905726505 0.0737775987144958 -2.61146870796827 8.3e-07 6.55 8.45 9.78 10.4 9.73
"724" "Gbp4" 343.63 547.15 348.74 302.28 254.92 179.92 56.02 136.23 57.66 152.92 250.78 -1.29787121444629 1.52e-08 -2.74090098607955 8.66e-07 -1.33376662273981 0.0197873505035667 -0.620121431923946 0.395999787057804 0 0 0 5.84 7.13
"725" "Tmem90a" 1.93 0 1.07 0.71 5.85 7.06 14.9 13.28 9.65 20.45 2.34 3.46929623854685 1.52e-08 3.37910975553464 0.000405704604181386 4.46260975120831 1.17e-08 1.3350893429626 0.254650754177315 0 0 0 0 0
"726" "Rps26" 2852.76 3644.49 1531.62 2797.77 4541.88 5676.46 4296.86 7803.5 5288.6 2447.48 4706.92 1.04366741842149 1.55e-08 0.966372188906858 0.00354482651150574 -0.145216602600157 1 0.798269659577739 0.016739009582746 6.23 9.01 9.82 9.39 9.35
"727" "Prdm5" 0 0.55 0.41 0.41 1.68 3.8 23.67 3.73 23.76 2.55 4.29 4.58496250072116 1.57e-08 6.11628703784024 1.39e-11 2.89632135389833 0.0696088040068449 3.64680175453902 0.00826777273813796 0 0 6.14 0 0
"728" "Cr2" 2601.22 2364.72 3120.61 2452.62 1723.17 1152.4 264.97 471.01 77.12 126 37.89 -1.54507120470924 1.58e-08 -5.09444048678338 7.62e-09 -4.3861937097387 2.47e-07 -6.11972839850463 3.53e-11 0 6.5 6.69 0 0
"729" "Crmp1" 0.79 1.18 0.59 2.33 7.2 8.51 16.19 10.89 4.75 53.56 88.27 3.12936730867126 1.63e-08 1.95809304826608 0.0650355362529757 5.45324959037208 2.08e-22 6.17401682743359 2.07e-35 0 0 0 7.83 7.7
"730" "Kars" 325.2 341.88 337.12 418.94 583.45 567.24 1021.16 906.81 726.33 711.64 765.23 1.11322495576494 1.72e-08 1.0296194822596 0.00538408425927244 1.0001419167276 0.00758257907840349 1.10488774662313 0.00179823411156635 0 8.01 8.97 9.64 9.07
"731" "Rab6b" 19.14 20.44 21.11 19.66 7.14 7.23 2.09 2.43 3.57 15.72 16.07 -2.08867532217409 1.74e-08 -2.49230204453336 0.00387807907190967 -0.353696806303849 0.848669655874702 -0.321928094887362 0.894879075828405 0 5.91 0 0 6.95
"732" "Sema3g" 3.28 1.62 1.21 1.68 5.7 9.57 16.49 14.89 144.91 9.34 0.95 2.58218184767745 1.77e-08 6.21739001782229 5.3e-55 2.26179922164799 0.00337229601169812 -1.03562390973072 0.980250037174547 0 0 7.83 7.77 0
"733" "Got1" 122.15 137.61 148.35 139.19 251.96 257.75 416.95 341.82 342.32 149.06 266.24 1.21269701109164 1.82e-08 1.32301372752864 0.000398810470101179 0.1235613082266 0.888321374306938 0.960395482046242 0.0183975882175576 5.43 8.91 9.84 9.44 9.74
"734" "Gm16379" 139.56 334.79 121.67 193.07 206.02 544.33 551.05 727.42 831.23 555.46 746.89 1.36237911073085 1.83e-08 2.07505786679617 1.43e-08 1.49349316661479 0.000261523136964968 1.92070592549043 2.19e-07 0 0 7.8 7.44 6.1
"735" "Fanci" 46.81 51.46 43.85 55.08 73.62 80.87 180.09 127.15 147.75 167.64 106.15 1.22738991999385 1.86e-08 1.58349857868698 1.01e-05 1.76570687486535 3.4e-07 1.10644481952747 0.00530415635870656 0 6.84 8.34 8.55 7.71
"736" "Anp32b" 250.08 198.34 255.87 149.79 260.79 363.56 1128.11 184.83 684.46 471.35 293.62 1.18159681667988 1.88e-08 1.68059502192378 4.97e-07 1.14242751749519 0.00251441329953074 0.459579030470421 0.322126477689007 8.25 9.01 11.2 11.3 10.9
"737" "Sap30" 42.89 79.76 46.76 47.96 89.63 135.07 195.21 204.42 223.21 176.54 328.41 1.52215594846152 1.91e-08 2.03824881991835 1.14e-06 1.69984226016094 0.000170119137428149 2.59534521480191 3.81e-12 6.48 8.8 9.73 10 9.61
"738" "Lpp" 180.78 134.63 149.33 112.38 103.16 76.31 36.51 27.88 25.04 21.01 32.98 -1.24281819386065 1.92e-08 -2.52656486085495 5.19e-06 -2.77972326111452 7.18e-07 -2.1292080243501 7.98e-05 0 6.57 0 0 6.9
"739" "Ssx2ip" 17.44 15.84 14.2 18.54 23.7 30.88 87.07 55.68 36.59 44.19 38.62 1.57963526140549 2.08e-08 1.14854627711655 0.0375055718251622 1.42081679253447 0.00591461824442591 1.22644502572811 0.0206755547002749 5.11 0 7.07 7.57 0
"740" "Cdyl2" 157.82 167.94 145.07 105.52 83.03 55.51 30.88 32.03 4.5 10.6 178.61 -1.51652337756102 2.09e-08 -5.00087637137994 1.52e-11 -3.76480901314642 1.55e-08 0.309867673148078 0.472248647550689 5.83 7.3 0 5.31 7.71
"741" "Pcdh9" 0.66 0 0.65 0.32 3.31 2.63 7.29 5.15 8.07 6.23 0.21 3.49519289705796 2.11e-08 4.3076967090467 1.52e-07 3.93436019879292 7.6e-06 -0.956410731452317 1 0 0 6.4 5.83 0
"742" "Efr3b" 0.74 0.73 0.27 0.54 2.65 3.17 8.47 4.45 4.24 6.96 16.27 3.03901522349445 2.13e-08 2.89503044039846 0.00082645893899616 3.61005348168399 2.02e-06 4.83510852150779 2.43e-15 0 0 0 6.06 0
"743" "Gm5088" 48.71 65.2 60.89 80.56 105.47 123.26 233.98 154.85 243.84 169.19 136.84 1.27404675410911 2.17e-08 1.93340225127098 2.31e-08 1.40611174360084 0.000354084510311547 1.09995745254555 0.00890622181429806 0 0 0 0 0
"744" "BC017612" 25.57 22.75 10.39 39.4 88.02 106.5 102.9 90.32 112.28 50.55 76.77 1.9826174761695 2.23e-08 2.19462887118635 8.5e-05 1.0433108994642 0.157547512124144 1.64614245543443 0.00799859669118016 0 0 0 0 0
"745" "Wdr12" 134.57 125.36 122.95 118.44 236.62 278.93 322.36 273.7 366.07 536.86 411.04 1.14884702190235 2.24e-08 1.54638775628487 3.28e-06 2.09881412643857 2.84e-12 1.71354700422881 6.83e-08 6.09 9.47 10.2 11 9.96
"746" "Bri3bp" 122.04 120.67 144.29 160.72 254.68 277.21 312.54 345.48 364.93 438.61 512.59 1.1193419915559 2.4e-08 1.41418119486871 2.59e-05 1.67950014347156 1.31e-07 1.9043667723507 2.79e-10 0 6.89 9.91 10.3 9.77
"747" "Gm5779" 436.84 750.61 407.28 804.33 804.24 1538.61 1044.44 1829.01 1741.49 1428.14 1968.82 1.12055760468443 2.4e-08 1.5378529491011 2.57e-06 1.25166817353389 0.000355215105227917 1.71486197882119 3.88e-08 0 0 0 0 0
"748" "Wdr76" 103.61 101.88 109.54 114.88 148.61 200.47 346.72 250.59 315.64 267 157.44 1.13840016078397 2.4e-08 1.55424537606457 3.05e-06 1.31280507313007 0.000207768892364161 0.550767457007033 0.224507513605049 0 0 7 6.97 0
"749" "Marveld2" 70.24 68.67 100.28 92.96 48.97 33.22 15.14 20.8 43.33 22.5 62.31 -1.49145951991853 2.43e-08 -0.938396772694207 0.140297636738861 -1.88383800786168 0.00206091627702972 -0.414299292400272 0.586225225217541 6.23 6.81 7.86 6.48 7.41
"750" "Zmynd19" 82.43 74.71 73.93 69.85 127.72 163.51 296.83 216.26 346.74 282.47 219.59 1.41838959866795 2.43e-08 2.20447428026935 4.2e-09 1.90871765736141 1.65e-06 1.54543236087379 0.00025449757606594 5.44 6.97 8.75 8.61 8.07
"751" "Gars" 341.67 389.3 377.45 463.61 594.35 644.68 1184.32 946.92 912.13 874.79 823.06 1.10023542393817 2.43e-08 1.21468261248467 0.000498175628809115 1.15437988400961 0.0012112027722692 1.06644076049713 0.00278748113630621 7.23 8.09 9.1 9.65 8.8
"752" "Sox12" 4.9 6.73 8.85 3.6 7.83 16.61 39.4 25.05 7.61 17.03 28.5 1.88418573492274 2.43e-08 0.338132966743843 0.691664950736979 1.50024304291884 0.0190742405693832 2.24312652717976 1.96e-05 6.62 8.12 9.33 10.1 9.81
"753" "Snora16a" 1589.91 957.27 656.09 612.67 5135.02 3204.22 569.75 762.05 1241.21 1037.4 2013.43 1.34163255466173 2.46e-08 0.379708738040633 0.395945659344115 0.120933787533189 0.721694699985812 1.07761682835606 0.00709906732087017 0 8.02 9.89 9.48 9.48
"754" "Rangap1" 272.42 250.65 251.16 274.9 362.96 404.72 831.79 621.42 504.07 568.04 417.48 1.0819444819124 2.49e-08 0.942502542735973 0.0108431492210825 1.11487097300818 0.00156922756298822 0.670585533404738 0.0911624011581623 5.64 7.82 9.53 9.75 8.65
"755" "Ppan" 279.76 403.13 334.81 348.52 532.26 638.93 739.66 1023.98 1246.88 1113.57 911.79 1.10308712068323 2.5e-08 1.86813280959091 8.97e-10 1.70500243309309 5.97e-08 1.41658367475839 1.57e-05 8.46 9.84 11.4 11.5 10.7
"756" "Prdx6" 127.32 149.94 147.57 195.21 227.15 271.61 467.39 432.72 358 336.51 374.52 1.17382870126753 2.51e-08 1.20759829789296 0.00149552040324639 1.11828808815446 0.00439679598189081 1.27268147349435 0.000513841945602134 6.44 8.65 10.1 10.5 10.2
"757" "Eif3b" 517.65 540.82 607.69 608.48 825.33 1062.05 2081.78 970.17 1445.19 1701.58 1022.64 1.11867712672754 2.55e-08 1.34562094453473 7.77e-05 1.58123674874151 1.16e-06 0.846660129815882 0.0274569530587781 7.88 9.63 10.6 11.2 10.4
"758" "Srpk3" 589.53 583.5 775.46 745.53 377.18 280.14 174.92 338.52 170.76 255.8 42.92 -1.2023152003794 2.6e-08 -1.97971858838052 0.000102905433874352 -1.39667239185916 0.00567978157222321 -3.97196667487164 3.57e-12 0 6.17 7.42 7.9 0
"759" "Chst7" 12.11 15.78 8.54 11.31 38.31 46.8 53.64 37.65 109.31 106.79 7.46 1.88558008936311 2.61e-08 3.19515491749651 1.61e-13 3.16150608536327 3.41e-13 -0.677951030826539 0.828109785547267 5.18 7.27 8.39 9.71 0
"760" "Fzd9" 0.57 2.83 0.85 1.26 7.36 13.77 18.36 12.84 12.57 24.75 12.2 3.24751403504356 2.61e-08 3.18986042584935 0.000398863156416865 4.16730430128318 3.24e-08 3.14675692387909 0.000400707936029813 6.16 8.38 9.29 10.4 9.17
"761" "Cd69" 576.4 448.26 321.11 426.8 296.23 194.7 55.8 146.77 111.64 96 92.46 -1.35387481394081 2.63e-08 -1.98891666697307 0.000394450762700748 -2.20666438554326 8.87e-05 -2.2608694288032 4.4e-05 4.71 6.73 7.55 0 5.73
"762" "6720463M24Rik" 52.68 56.78 60.7 51.8 98.46 113.57 208.39 143.87 242.41 334.29 163.82 1.34613707515373 2.64e-08 2.1271495066037 2.77e-09 2.59080049050846 3.54e-15 1.56181179136459 8.05e-05 0 0 0 0 0
"763" "Trpm5" 18.74 10.36 13.44 14.16 1.88 2.84 2.77 2.16 1.65 4.82 2.94 -2.55474788767415 2.66e-08 -3.10281080558378 0.00402330127498116 -1.55624368359963 0.131456296311056 -2.26946067499323 0.0224776491135287 0 0 0 0 0
"764" "Fam54a" 9.43 7.25 8.51 6.15 16.64 19.34 63.88 29.66 73.69 54.9 28.41 2.04709780582999 2.85e-08 3.23346367384826 2.87e-11 2.80880096941998 9.81e-08 1.85839365171696 0.00304186210727708 0 0 0 0 0
"765" "Dusp6" 450.89 626.87 340.07 466.51 262.76 186.59 139.6 175.1 562.57 81.02 44.77 -1.30232034293912 2.85e-08 0.256045225216951 0.518764238466237 -2.53963740518844 4.18e-06 -3.39538317197133 2.08e-09 5.59 7.43 10.1 9.18 8.06
"766" "Ide" 125.08 107.31 119.35 179.11 198.14 205.67 391.46 357.25 331.56 209.02 240.22 1.11841561876307 2.88e-08 1.3209657054999 0.000165805442347452 0.655336730158396 0.147888039391144 0.856052008041511 0.0319580876145463 0 0 0 0 0
"767" "Prps1" 128.44 119.74 98.04 140.48 180.97 251.12 420.8 271.64 387.67 351.55 196.12 1.20821746984724 2.88e-08 1.67179632125205 1.51e-06 1.530697119865 2.08e-05 0.688703892119821 0.12240715992384 0 7.33 8.61 9.33 8.26
"768" "Idh3a" 211.04 219.6 175.19 241.52 304.19 379.81 613.99 524.66 489.52 429.76 433.23 1.10500764349154 2.9e-08 1.20840980289085 0.000577517489450154 1.02057320848354 0.00586909741212721 1.03217514772134 0.00417352183453388 5.59 6.72 8.6 8.72 8.32
"769" "Nfatc1" 661.47 584.26 736.28 444.12 355.67 293.72 210.86 171.42 164.76 147.26 139.34 -1.23367528677592 2.9e-08 -1.88021892042865 0.000652943095566931 -2.0422193451243 0.000219980777615535 -2.12197548334294 9.29e-05 5.36 6.44 8.2 7.96 8.14
"770" "Cct7" 660.64 691.69 525.83 762.43 964.42 1165.77 1792.59 1650.36 1136.9 1257.71 1272.33 1.07763008103192 2.94e-08 0.78424504849892 0.0397790765828759 0.929938993075835 0.0108868150609945 0.946612592126786 0.00759573757167564 7.37 9.32 10.8 10.6 10.4
"771" "Alms1" 52.51 51.56 47.28 40.31 68.67 97.48 170.29 74.9 181.88 158.89 102.32 1.10178209711357 3e-08 1.92443763542904 1.53e-10 1.72947905542389 2.65e-08 1.09453889556613 0.0016080543170021 0 7.74 8.77 9.04 7.75
"772" "Serpina3f" 54.13 343.37 64.53 50.34 59.21 52.02 16.85 27.35 49.21 15.28 23.88 -1.72092101686222 3.03e-08 -1.38016258470332 0.0702428060911333 -3.06746955779771 1.12e-05 -2.42331126456865 0.000345464642015437 0 0 7.31 0 0
"773" "Mnd1" 5.53 4.1 2.04 12.17 21.96 34.43 61.71 51.93 168.31 96.6 24.1 2.83433317623131 3.07e-08 4.81966475483903 5.62e-18 4.01863895326097 4.3e-10 2.01564891065516 0.0283571450244004 6.48 8.02 10.7 10.2 8.58
"774" "Crim1" 33.45 34.67 33.49 26.17 13.42 9.35 7.98 7.91 8.45 21.5 14.64 -1.72474850208328 3.1e-08 -1.91856689312497 0.00544256420172385 -0.57125347981769 0.534972104168164 -1.12567458601047 0.114356651342425 0 5.16 0 0 0
"775" "Arhgap31" 32.85 23.36 28.77 23.19 9.94 8.73 9.44 5.79 17.02 18.99 48.64 -1.6739432573591 3.16e-08 -0.667997493696847 0.427953503999894 -0.509988625233313 0.58236136091982 0.846914698060776 0.0463416412494536 0 0 7.1 0 8.14
"776" "Ttll12" 48.38 38.02 44.26 39.97 68.62 83.39 145.08 116.25 130.49 119.93 147.44 1.27645766167474 3.34e-08 1.61306792902431 1.95e-05 1.49132126598176 0.000126352345339643 1.78925665389045 6.03e-07 4.86 7.44 9.04 9.27 8.92
"777" "Trim7" 662.35 653.15 885.75 601.55 448.34 336.48 172.95 243.98 93.56 129.31 206.46 -1.22173199786834 3.4e-08 -2.90483312942853 1.07e-07 -2.43796304805511 4.72e-06 -1.76293459832282 0.000565901361408986 0 5.59 8.29 8.23 9.03
"778" "Dscc1" 13.84 29.2 27.95 20.32 48.88 76.89 115.49 85.38 130.8 100.99 48.27 1.83885669902518 3.53e-08 2.51851776718547 1.98e-07 2.14536767116158 5.81e-05 1.08035395824463 0.110500950881242 0 6.19 7.74 8.31 6.58
"779" "Mastl" 25.19 34.4 20.33 28.77 46.37 53.08 96.84 73.68 121.82 92.66 81.5 1.31257988729594 3.53e-08 2.16453179790923 7.25e-10 1.76979937585883 2.85e-06 1.58465275283136 3.96e-05 0 6.13 8.19 8.58 7.51
"780" "Tacstd2" 51.36 43.33 41.48 50.75 17.1 12.94 4.74 6.53 0 3.15 1.99 -2.17785797700868 3.53e-08 NA 3.55e-07 -3.89092530347752 0.000114437033169035 -4.55350870132115 2e-05 0 0 0 0 0
"781" "Ywhae" 870.81 729.97 677.58 715.37 1164.38 1426.52 2616.42 1065.3 1304.39 1303.37 983.8 1.06712405298342 3.57e-08 0.801431173166627 0.0295486439583158 0.800302580798655 0.0300694522117068 0.394492847403457 0.341241297434534 7.3 8.91 9.94 10.6 9.4
"782" "Gclc" 250.57 241.05 257.58 258.96 332.22 462.28 757.7 602.74 841 557.86 325.17 1.09592308103376 3.82e-08 1.73845308571501 2.8e-08 1.14625039537576 0.00143341051494456 0.367541446559893 0.44597217642603 6.06 7.6 8.64 8.69 7.88
"783" "Tlr9" 548.13 547.47 529.56 295.47 286.52 275.01 161.96 90.16 88.23 136.02 370.85 -1.23909937482562 4.1e-08 -2.44416652243769 9.08e-06 -1.81968891558396 0.000938711723857859 -0.372671943481699 0.736917212910127 0 7.48 8.52 8.44 9.44
"784" "Lpcat2" 107.85 130.53 132.89 105.42 58.76 51.14 25.77 37.98 31.44 23.01 31.76 -1.45686895015699 4.11e-08 -1.92237823816784 0.00137318263242974 -2.37271847220236 9.02e-05 -1.90776854328349 0.00115310833397694 0 0 0 0 0
"785" "Eif2a" 294.24 269.63 244.51 298.82 450.48 507.72 693.58 687.69 914.14 495.78 509 1.07926588044906 4.2e-08 1.72357118712116 2.49e-08 0.840856130622648 0.028648500760115 0.878821713326333 0.0171731904088798 6.04 8.11 9.83 9.71 8.94
"786" "Plcd3" 15.14 15.37 19.72 16.08 28.95 42.1 80.95 52.07 112.18 26.39 154.04 1.62176574959465 4.21e-08 2.75851712802855 4.45e-12 0.670764895673031 0.331655515433033 3.21600666814375 1.35e-18 0 6.93 9.46 8.85 9.28
"787" "Ctdspl" 0.26 0.52 1.16 0.77 1.58 2.02 14.94 6.3 16.42 6 2.28 3.19630041686661 4.38e-08 4.59908937042393 4.16e-11 3.14666964914201 0.000622307789711615 1.75074097281087 0.12221741315146 0 0 7.3 7.49 0
"788" "Eif4a1" 569.29 698.84 544.86 825.13 970.98 1416.16 1635.3 1560.86 1668.16 2068.78 1893.48 1.08160788674477 4.4e-08 1.33874748029779 6.35e-05 1.64927004316414 1.59e-07 1.5215299928855 1.62e-06 7.62 9.74 10.6 11.2 10.1
"789" "Mms22l" 88.47 103.52 90.33 74.25 143.72 164.29 291.62 169.16 369.15 340.12 260.77 1.10840424345525 4.4e-08 2.0500218315271 8.7e-12 1.93185851602256 2.8e-10 1.54859257884906 1.68e-06 0 6.48 8.1 8.55 7.44
"790" "Nop10" 486.67 615.24 450.63 622.41 765.47 952.46 1351 1656.9 940.31 992.63 1299.85 1.11958549769639 4.42e-08 0.790226130696867 0.0562967065393757 0.8683457274291 0.0312131748189613 1.25736291365993 0.000359558213032684 0 8.17 9.15 9.39 9.01
"791" "Lmo2" 769.11 851.17 905.83 1042.06 524.8 433.05 193.38 428.82 354.54 125.53 145.03 -1.17521413930705 4.7e-08 -1.33116404203488 0.00980185665707947 -2.82908025647691 1.27e-07 -2.62076108878529 5.12e-07 0 6.75 8.47 8.17 7.36
"792" "Lap3" 160.92 245.52 133.04 195.11 327.01 344.63 479.19 416.83 360.08 619.9 460.44 1.09360153439337 4.97e-08 0.971378213092159 0.00868954910109437 1.75509624723948 2.01e-08 1.32607391403056 7.09e-05 7.25 7.96 9.38 9.65 8.71
"793" "Snrpd3" 575.99 466.68 351.59 314.06 623.52 986.02 1547 605.61 1213.73 899.4 552.16 1.13897912764592 5e-08 1.50686927913063 8.84e-06 1.07445654532544 0.00348451281372313 0.370580040204574 0.371754669951918 0 7.84 9.35 8.97 8.23
"794" "Atp5g3" 992.71 1141.62 942.22 1103.13 1572.39 2046.08 2880.91 2275.56 2312.05 2637.4 1597.61 1.06999676827701 5.06e-08 1.1457801051285 0.000971466206291974 1.33572390091981 6.09e-05 0.612522775730859 0.127102022005501 0 7.58 8.98 9.03 8.04
"795" "Il5ra" 320.95 275.99 280.52 253.23 166.46 138.71 71.63 98.57 7.13 24.39 7.25 -1.25008067686608 5.18e-08 -5.30908564946381 4.97e-16 -3.53476987311151 7.97e-10 -5.2850067310054 3.83e-16 0 7.43 7.79 8.2 5.84
"796" "Ipo7" 615.81 553.32 569.66 644.7 1113.8 1088.82 1697.73 1165.48 1367.83 1186.47 1745.35 1.08772309110058 5.45e-08 1.19881336425254 0.000556951464178347 0.993600049767715 0.0069823718437277 1.55044080063457 1.17e-06 7.21 9.29 10.3 10.5 9.76
"797" "Serinc5" 280.76 275.58 228.86 283.86 380.9 491.46 708.1 633.56 188.41 218.92 666.3 1.05032542928567 5.47e-08 -0.504395381049434 0.484641696334294 -0.287867158479785 0.796851236151033 1.31790097346823 4.38e-05 0 0 7.85 7.75 7.93
"798" "Slc1a4" 5.23 5.17 5.23 4.97 8.38 14.01 33.28 25.02 125.61 48.95 129.66 1.96974555239759 5.6e-08 4.60823508139088 4.67e-35 3.24866452242048 4.34e-12 4.65401723551008 1.41e-36 5.47 7.74 9.38 9.46 8.82
"799" "Phb2" 794.95 929.16 797.8 1094.99 1265.61 1531.92 2256.65 2515.28 2115.37 1499.73 1604.72 1.0654366720904 5.65e-08 1.22615631670493 0.000369633788125029 0.729949081306317 0.072977248922176 0.827567879342001 0.0293561740574532 5.6 7.19 9.58 9.77 9.01
"800" "Fbl" 107.35 164.89 93.15 141.49 167.2 322.28 496.83 242.55 358.91 301.93 307.95 1.27760441790293 5.78e-08 1.50197787975235 0.000118198246852714 1.25256987074651 0.00248949950805624 1.28105188763751 0.00147194034894098 8.17 9.33 10.8 10.9 10.2
"801" "Lilra6" 50.83 52.23 60 93.25 21.12 25.68 10.03 22.91 7.46 8.71 27.52 -1.68451425639452 5.79e-08 -3.10257032613662 3.04e-05 -2.87907323779299 8e-05 -1.21933739168976 0.0717310790396375 0 0 0 0 6.98
"802" "Slc16a7" 66.92 63.69 62.71 53.87 22.29 17.16 16.64 14 1.5 5.97 15 -1.81833985122821 5.88e-08 -5.3645140696655 2.03e-08 -3.37174563889658 1.9e-05 -2.04258597477814 0.00459544371674173 0 0 0 0 0
"803" "Egr1" 114.43 124.03 77.84 53.09 39.87 42.56 23.99 16.76 35.72 20.25 3.05 -1.58437677742096 6.15e-08 -1.3703408251295 0.0492133439100898 -2.18915099759137 0.000892811033411094 -4.92019175780047 1.66e-10 0 6.1 8.86 7.48 6.33
"804" "Eif2s1" 264.05 305.04 199.86 261.26 424.56 536.55 567.82 585.62 543.58 792.65 614.06 1.03741222515936 6.32e-08 1.07762583181912 0.00151921869656553 1.62181743069861 1.09e-07 1.25351308465708 9.44e-05 6.71 9.12 10.3 10.7 9.61
"805" "S100a6" 68.88 88.04 60.81 96.16 136.03 150.08 304.29 320.32 598.68 571.68 768.2 1.5367484991281 6.32e-08 2.9315260073312 3.28e-15 2.86494875118688 2.3e-14 3.29122289602004 3.64e-21 0 0 8.65 7.86 8.23
"806" "Snora74a" 31712.39 18531.12 12424.34 6039.32 72554.6 49173.97 14103.7 7208.3 30618.64 31324.39 63102.09 1.05789182483515 6.43e-08 0.833949542846893 0.00760230213128481 0.866825754622823 0.00522741725336703 1.87722712873365 1.35e-10 5.65 8.92 10.7 9.92 10.2
"807" "Rps12" 1662.71 2107.47 1235.07 2065.47 2682.27 4056.09 2930.14 4894.67 3102.82 2333.35 4240.28 1.04239538966168 6.44e-08 0.811722876217289 0.0286451522746312 0.400545596442983 0.356283400062626 1.26230240413561 9.51e-05 5.95 9.46 10.3 10.1 10.1
"808" "Pkm2" 933.54 1157.34 820.23 1124.2 1358.2 1752.3 2745.82 2623.93 2512.7 2729.64 2449.84 1.07142728817486 6.5e-08 1.31655892484757 9.39e-05 1.43603118483074 1.39e-05 1.28000802106252 0.000121875626339206 0 0 0 0 0
"809" "Gzma" 218.76 372.74 169.72 296.82 176.99 103.99 11.25 65.58 28.84 54.41 86.63 -1.56412855744782 6.71e-08 -3.19717919585282 4.61e-06 -2.28137853203379 0.00058371167688049 -1.61038364314383 0.0137899525703043 0 0 0 0 0
"810" "Mpa2l" 43.94 148.88 43.62 49.5 32.83 34.14 7.57 21.34 11.45 63.83 153.46 -1.57641063785635 6.78e-08 -2.64229294852118 5.91e-05 -0.163405899049698 1 1.10215020805718 0.00103699594492926 0 0 0 0 0
"811" "1110004E09Rik" 44.66 47.24 27.62 46.49 80.17 78.51 216.21 121.15 114.04 124.18 74.46 1.57918631400092 6.79e-08 1.45826979609414 0.00480630135533516 1.58116268851485 0.00167755443506457 0.843267373007696 0.148968759900367 7.07 8.17 9.81 10.2 9.21
"812" "Trim28" 582 605.67 745.31 820.26 910.14 999.15 2090.84 1964.03 1310.63 1249.35 1080.68 1.1151885860165 6.81e-08 0.929130084977103 0.0215181183880932 0.860047323168077 0.0392363540663928 0.650809014908677 0.145416388767065 7.58 8.83 10.3 10.3 9.45
"813" "Skp2" 34.9 31.23 37.87 29.47 54.88 63.63 111.45 78.93 103.33 90.19 90.28 1.21057766158751 7.02e-08 1.63074367113052 6.59e-06 1.43452388136123 0.000157626329641633 1.43596281929489 0.000112219394438843 0 6.82 8.15 7.78 7.56
"814" "Atad3a" 159.3 169.85 196.97 193.85 332.16 326.41 461.33 448.04 533.84 647.08 551.48 1.12286165510765 7.27e-08 1.56847061595436 3.27e-06 1.84600729396658 7.09e-09 1.61537177290896 9.38e-07 6.62 8.77 9.91 10.2 9.35
"815" "Gemin5" 139.38 136.66 137.42 142.22 232.13 254.3 392.79 277.65 342.48 476.97 305.64 1.05790053382628 7.54e-08 1.30176542481483 0.000101277300557202 1.77964421200754 5.14e-09 1.13757904961326 0.000863262493473868 5.98 7.57 9.31 9.72 8.38
"816" "Hprt" 573.09 531.23 496.08 549.33 811.09 928.34 1337.44 1367.32 990.34 1375.26 641.92 1.04776502400827 7.6e-08 0.881840343486281 0.0181742376999422 1.35554892058398 4.11e-05 0.256309943394029 0.588253535019826 4.99 6.76 8.43 8.76 7.77
"817" "Fam33a" 78.8 67.29 56.88 73.59 106.38 113.83 259.04 231.48 203.79 177.05 109.3 1.36170908820527 7.83e-08 1.55949075130712 0.000271732522649233 1.35656433501588 0.00258977415291546 0.660700892296868 0.221076374845603 0 0 0 0 0
"818" "Gm12238" 672.18 568.3 86.35 64.34 2594.83 1347.15 116.4 98.33 982.1 895.9 1717.55 1.57914337240352 7.95e-08 1.49764310915146 0.00121862713290822 1.36511088636151 0.0034706664556952 2.30405337131107 1.01e-08 0 0 0 0 0
"819" "Etf1" 438.52 439.72 337.65 465.58 682.42 774.6 1088.34 920.73 910.9 790.38 766.87 1.04358607659363 8.06e-08 1.11564154735217 0.00115499888691771 0.910895306926971 0.0120344872269013 0.86733089832781 0.0151535549988849 6.21 8.33 9.68 9.85 9.21
"820" "Ahr" 93.23 93.05 80.56 76.15 57.4 47.4 11.48 20.59 5.93 11.93 42.6 -1.32536025214253 8.28e-08 -3.85399059970848 1.3e-09 -2.84550056655925 1.75e-06 -1.00924117914128 0.0989987331213052 0 0 0 0 7.81
"821" "Rftn2" 52.58 56.21 68.21 63.18 24.12 27.38 12.4 19.53 9.18 13.9 4.46 -1.52547787104085 8.28e-08 -2.70947805769489 4.62e-05 -2.11095923349782 0.00107079289303158 -3.75092850118839 1.27e-07 0 0 0 0 0
"822" "Eml1" 0.29 0.29 0.43 0 1.54 1.5 9.5 4.4 4.64 89.46 63.01 4.0680066765804 8.43e-08 4.19976951237578 0.000147757720895858 8.4688155602528 3.18e-55 7.96315361156307 1.83e-42 0 0 0 7.54 6.91
"823" "Nfkb2" 805.07 825.45 894.51 737.35 499.4 361.61 220.43 350 103.08 119.58 242.8 -1.18845763622124 8.43e-08 -2.98408848863861 1.07e-07 -2.76987681493801 6.37e-07 -1.74808450935518 0.000958184910494534 5.7 7.87 8.79 8.22 8.66
"824" "Hint1" 882.91 935.19 709.49 1001.84 1275.91 1595.97 2156.34 2375.54 2654.32 3562.25 2332.27 1.06882292135608 8.49e-08 1.58890710162468 7.78e-07 2.01335356059168 1.5e-11 1.40229960648134 2.02e-05 6.67 8.07 9.38 9.88 8.8
"825" "Uchl5" 152.71 160.03 135.94 150.85 247.91 284.19 473.2 319.48 513.31 575.56 453.92 1.14384894610874 8.58e-08 1.77599841980098 8.41e-08 1.94113438506846 1.55e-09 1.59860610897726 2.31e-06 0 8.07 9.31 9.62 9.32
"826" "Snx29" 968.17 757.72 956.09 747.07 608.64 415.79 237.45 257.25 238.62 185.61 475.44 -1.17456360661473 8.74e-08 -1.84502206770372 0.000458247641310773 -2.20746259589529 3.2e-05 -0.85047374961944 0.130199122948068 0 0 5.88 7.18 6.6
"827" "Metap2" 137.53 116.35 121.26 131.48 197.15 212.34 399.55 249.01 327.48 190.83 223.53 1.0624318691144 8.75e-08 1.37050276853702 4e-05 0.59138396044613 0.164092210059668 0.819564436845319 0.0303593768954448 7.33 8.63 9.68 9.23 9.03
"828" "Hist2h3c1" 8.85 52.5 1.63 27.6 26.79 108.32 91.83 174.93 620.54 689.74 150.03 2.14946443827876 8.96e-08 4.77625976495517 1.13e-30 4.92878819072415 2.63e-34 2.72798656637862 2.77e-06 0 0 0 0 0
"829" "Igll1" 2.78 9.61 1.03 2.04 2.1 7.16 75.09 35.82 90.08 0 0 2.95846455309442 8.97e-08 4.54266650815538 6.58e-12 NA 0.588387897797119 NA 0.702299556170656 0 0 7.04 0 0
"830" "Whsc1" 232.29 218.79 209.84 206.87 306.61 413.56 740.36 334.52 662.77 784.63 411.9 1.04860616354972 9.03e-08 1.61116233974689 2.61e-07 1.85466653599359 8.41e-10 0.924948164888497 0.00893071446692953 6.86 6.73 9.05 8.95 7.54
"831" "Dek" 654.59 546.24 563.76 584.59 793.59 966.58 2004.27 1071.78 1237.26 625.9 810.41 1.0417226139235 9.25e-08 1.07499144219642 0.0020790435371947 0.091846820935658 0.881646591173311 0.46456662094173 0.269255028485006 5.97 6.92 8.61 8.38 8.05
"832" "Srsf2" 738.24 830.36 1014.66 1081.13 1267.14 1353.79 2566.42 2599.18 2097.86 1997.66 1328.23 1.08740748965273 9.45e-08 1.1953453461116 0.00101711810024611 1.12473800134371 0.00263029375682754 0.535931932167012 0.265768184797543 7.71 9.56 10.7 11 10.2
"833" "Tbc1d2" 8.42 8.32 11.19 4.12 17.41 21.93 34.76 30.84 13.72 33.29 17.94 1.71116843313671 9.62e-08 0.775956124666709 0.271470100707003 2.05476451363416 4.92e-05 1.16285553341316 0.056858386381007 5.73 8.14 9.37 9.98 9.06
"834" "Fcrl6" 1.26 0 1.86 0.46 1.43 0.54 41.67 0.71 0.63 0 0.61 3.63090261192417 9.74e-08 -0.50653585376434 1 NA 0.971740805497965 -0.55307843970137 1 0 0 0 0 0
"835" "Mif4gd" 805.8 826.33 1051.33 939.98 523.6 409.38 253.38 446.13 182.87 249.03 106.06 -1.15028585074043 9.79e-08 -2.30846968105277 9.01e-06 -1.86296854953399 0.000270841372037714 -3.09440744644551 8.57e-09 5.28 7.14 8.64 8.99 7.75
"836" "Srgap3" 11.01 13.31 17.87 11.67 6.27 4.09 2.74 2.29 3.53 7.38 64.53 -1.80722099817346 9.79e-08 -1.93147414123049 0.0124041439311941 -0.867521508441276 0.305639523907302 2.26075579564255 2.03e-10 0 0 0 0 7.31
"837" "Arhgap26" 400.21 352.31 434 301.42 257.25 192.83 103.58 108.22 98.3 80.59 38.07 -1.16867476936338 1.01e-07 -1.9199811252948 0.000466027125402473 -2.20657170863415 6.32e-05 -3.28851797196048 8.82e-09 5.23 7.88 8.16 8.66 7.7
"838" "Gpr18" 1026.32 1009.3 877.3 809.28 575.67 441.16 222.1 354.2 191.45 300.2 161.68 -1.22429157976693 1.02e-07 -2.28111601058432 2.52e-05 -1.63215969381379 0.00262227207132403 -2.5249424439421 2.63e-06 0 7.14 7.88 8.94 8.07
"839" "Ehd3" 69.02 55.83 63.66 70.03 30.49 22.69 16.61 20.18 11.21 38.87 52.14 -1.52287157624164 1.03e-07 -2.52752932102611 0.000118612371843162 -0.733658491492341 0.319352722029386 -0.309925016295982 0.807520977644585 0 0 0 5.86 0
"840" "Fam83d" 7.48 11.63 12.63 15.69 23.46 20.2 73.95 52.45 72.56 54.56 27.44 1.84217206948262 1.03e-07 2.613374587449 1.56e-07 2.20204377594465 5.63e-05 1.21048061309329 0.0810214385217596 0 0 7.97 8.14 7.52
"841" "Magi1" 0.16 0.61 0.46 0.68 0.35 0.67 12.29 1.83 3.4 1.28 2.4 2.98672066194998 1.04e-07 2.83196210810195 0.00183434895298359 1.42257117196425 0.195531373702466 2.32946176757277 0.0163275004858152 0 0 6.26 0 0
"842" "Ruvbl1" 91.24 119.08 97.05 115.69 151.89 226.32 299.74 312.29 244.06 273.87 267.27 1.22691594063045 1.04e-07 1.20637357882503 0.00349692615092942 1.37262895397971 0.000525940318589902 1.33743562343088 0.000631428927047752 6.45 8.19 9.67 9.55 8.85
"843" "Slbp" 313.29 352.97 279.01 396.2 405.76 562.99 921.75 909.54 609.9 726.08 421.16 1.06163264574188 1.04e-07 0.862829829806137 0.0274834503076054 1.11438562802522 0.00208454881540146 0.328625535683889 0.50082043187395 0 7.67 8.83 9.23 7.27
"844" "Smarcc1" 286.82 240.44 250.56 207.97 331.77 461.26 930.27 287.17 632.31 432.77 380.99 1.02818055728744 1.07e-07 1.35935168978313 2.37e-05 0.812320147561049 0.0265705332267434 0.628472785039231 0.0956752596399265 6.7 7.43 9.5 9.51 8.83
"845" "Ube2s" 68.47 137.81 66.83 137.27 115.65 195.33 309.86 414.11 307.54 265.36 203.72 1.33452874305993 1.07e-07 1.58381364343859 0.000184052807274565 1.37099049478266 0.00227132671342878 0.989627199892173 0.0402397027818869 5.95 8.43 9.62 9.69 9.23
"846" "P2ry10" 1155.42 856.39 759.72 1048.22 656.06 451.43 158.81 405.9 100.23 449.55 676.37 -1.19173080968109 1.08e-07 -3.25209192433729 1.63e-08 -1.08692472827132 0.0625982917912069 -0.497593641580784 0.512299275241399 0 6.7 0 7.31 6.77
"847" "Bzrap1" 27.92 32.31 34.44 16.76 35.05 51.77 102.74 60.39 123.33 71.33 30.58 1.16550182913245 1.1e-07 2.14638607984666 2.15e-11 1.35644318078498 0.000298710072929889 0.134522613922369 0.806038112854503 0 10.3 11.4 12.4 11.7
"848" "Rpl10a" 895.07 1554.14 977.21 1450.32 1752.19 2663.9 2141.71 3461.99 3130.58 1548.59 2825.4 1.03886330883826 1.12e-07 1.36051291071125 3.46e-05 0.345038172969333 0.464031098183831 1.21253807032948 0.000281597022523397 8.48 10.1 11.6 11.5 11.1
"849" "Hdac2" 266.43 252.11 242.66 310.07 358.06 445.78 810.46 633.1 441.63 331.5 399.41 1.06893478432567 1.15e-07 0.72158794419082 0.0843634865903712 0.307758636567593 0.557661866513547 0.576620220117785 0.185031516874862 0 7.05 8.29 8.34 8.29
"850" "Celsr2" 8.02 6 7.79 5.72 7.8 15.94 37.04 13.88 8.01 52.47 3.33 1.43933089870751 1.15e-07 0.218869537813149 0.745374991425738 2.93048818004725 3.72e-17 -1.0474105275243 0.316323778055402 4.62 5.14 7.21 7.59 6.46
"851" "Relb" 281.13 394.69 349.21 341.27 197.36 148.56 81.15 151.8 87.14 98.47 157.44 -1.23896299676267 1.16e-07 -1.97079536907546 0.000248037779093517 -1.79444622419159 0.000803695662559974 -1.11740026165139 0.0387464196758443 0 6.05 7.74 7.74 6.06
"852" "Lsm2" 106.42 101.13 114.34 119.68 187.21 223.18 392.87 337.92 331.1 311.41 207.53 1.36981230326047 1.16e-07 1.58462485112207 0.000245059358210719 1.49617311338075 0.00080072164475824 0.910677744185477 0.0760810942159351 7.36 8.4 9.79 10.1 9.35
"853" "Cd276" 8.34 10.5 9.53 9.46 2.58 1.3 0.24 0.21 4.92 3.49 1.47 -3.12709184632265 1.17e-07 -0.942800555710136 0.588982924211738 -1.43823183483972 0.328144200524668 -2.68564271621301 0.0617800984322321 0 0 5.66 0 6.19
"854" "E2f1" 37.81 36.41 24.3 25.58 44.96 71.28 149.46 60.03 162.73 101.61 116.54 1.39217348378064 1.19e-07 2.39097712731521 1.18e-10 1.71153927719759 5.33e-05 1.9093221003296 1.78e-06 4.98 6.8 8.89 8.9 8.56
"855" "Eef1e1" 191.83 160.94 147.71 177.46 288.57 359.5 444.54 477.23 410.81 316.49 447.13 1.2113880246812 1.21e-07 1.27731370480284 0.00143765551490521 0.901002320567227 0.041927705512183 1.39953675056268 0.000228371754578846 7.32 9.42 10.6 10.1 10.3
"856" "Prkar2a" 45.15 60.61 46.38 59.9 89.83 110.69 165.85 117.37 193.1 109.99 181.03 1.18989539207217 1.21e-07 1.86501171856524 5.13e-08 1.05303591797007 0.0113923003648719 1.77189235249572 2.67e-07 0 5.63 9.18 9.19 9.1
"857" "Ltb" 3187.07 3721.69 3043.53 3157.12 1796.45 1590.92 565.41 1683.25 312.72 433.21 554.64 -1.21785156122365 1.22e-07 -3.38958745735442 1.32e-08 -2.91939240132278 5.62e-07 -2.56290728145493 5.78e-06 0 7.1 7.72 8.34 7.99
"858" "Snhg7" 125.36 173.85 116.65 176.81 268.56 363.56 460.71 398.94 755.62 558.45 827.97 1.33172418151073 1.28e-07 2.3504318555046 3.22e-11 1.91419908445417 6.72e-07 2.48234946276177 4.36e-13 6.08 8.96 10.2 10.1 9.83
"859" "Lrrc59" 248.98 281.84 284.37 329.7 411.34 421.37 859.13 680.79 588.56 684.93 580.47 1.05127814472313 1.28e-07 1.04005240944238 0.0049228395610677 1.25881946482153 0.000301481494972701 1.02008442025301 0.00506890129154468 0 6.75 8.3 8.51 8.29
"860" "Elof1" 227.14 286.97 180.49 295.47 332.47 454.24 638.47 742.35 469.47 455.76 255.6 1.13044952596743 1.34e-07 0.923502439620766 0.0258266325234927 0.880743780994892 0.0344378678104305 0.0463573059585947 0.97133529675665 0 0 8.78 8.95 8.6
"861" "Samsn1" 415.75 343.1 338.53 423.27 287.85 159.15 63.41 139.15 33.33 81.89 162.37 -1.22715343475381 1.34e-07 -3.51172300607936 1.94e-09 -2.21485703565693 4.9e-05 -1.22733112844056 0.0231060491610108 0 0 0 0 6.48
"862" "Olfr164" 419.22 316.24 330.37 202.9 210.2 164.17 62.5 33.58 189.51 280.07 7326.09 -1.43127177530297 1.36e-07 -0.743039196963021 0.363066911856178 -0.179525719161378 1 4.52965834433614 4.89e-80 0 0 0 0 0
"863" "Prdx2" 456.52 488.15 320.16 423.45 633.65 805.15 1014.5 1060.66 780.79 594.37 452.18 1.05754357519523 1.38e-07 0.88745228695248 0.0190219622866852 0.493879010995628 0.245215874725522 0.0994148941575032 0.827520945034453 5.37 7.3 9.02 8.96 8.47
"864" "Paqr8" 9.29 11.89 11.51 8.42 2.07 2.58 0.86 1.07 0.82 2.51 1.06 -2.6433298828287 1.38e-07 -3.64772165194585 0.00500355669826993 -2.03373010261317 0.0816876069278893 -3.27735320200074 0.00696739478358445 0 0 0 0 0
"865" "Dsn1" 49.74 55.98 60.19 49.7 81.28 83.62 193.99 165.86 162.67 153.77 110.2 1.2832061696244 1.42e-07 1.59352411829405 8.24e-05 1.51234997400148 0.000248250297580379 1.03170013201604 0.0247101093056106 0 6.16 8.22 8.65 7.78
"866" "Hvcn1" 2904.44 3004 2828.87 3254.15 1485.48 1262.82 690.03 1392.26 1404.68 749.13 1163.47 -1.31173600910907 1.42e-07 -1.09369390956233 0.117476552793449 -2.00064741415927 0.00204595902537854 -1.36550140581357 0.035345562965715 0 7.17 8.06 8.38 9.04
"867" "Cox5a" 385.78 488.46 354.59 427.84 618.2 944.6 1018.74 1027.82 916.51 1009.78 664.58 1.12345679191744 1.43e-07 1.14593627327493 0.00249620738658385 1.28575475447145 0.000448798276955214 0.682228528179816 0.108937468443585 8.34 9.18 10.2 10.5 9.32
"868" "Dennd2d" 441.49 389.88 502.5 436.8 324.82 229.12 83.15 157.42 201.73 108.2 173.22 -1.15615807877795 1.46e-07 -1.1337978084474 0.0346004250193695 -2.03252295760063 0.000109296995845456 -1.35361794335767 0.00837594761357213 0 7 9.12 6.57 10.1
"869" "Ddx60" 94.19 113.08 87.9 55.5 62.12 32.4 17.25 25.9 6.04 58.06 54.9 -1.34889979997845 1.46e-07 -3.8594216527868 1.04e-09 -0.594497535485217 0.46747599707799 -0.675235958219318 0.371754669951918 0 0 0 0 0
"870" "Odc1" 151.77 246.19 110.7 133.99 234.71 285.56 422.63 360.37 362.15 485.89 344.12 1.02003086365138 1.54e-07 1.17255414434279 0.000503376036405911 1.59659650999877 3.16e-07 1.09887851192237 0.00102909604955693 8.15 8.57 10 10.6 9.99
"871" "Pmf1" 154.65 157.73 163.7 143.87 228.52 255.21 529.93 437.02 508.07 356.12 149.81 1.22650554632463 1.58e-07 1.71287541542923 4.54e-06 1.20021159651469 0.00462735155295927 -0.0490179357711916 1 5.88 6.21 9.17 8.56 7.6
"872" "Zmat1" 57.93 49.1 45.34 41.25 30.79 17.48 9.33 5.03 4.47 8.25 8.69 -1.62830219960333 1.64e-07 -3.43680934202478 8.24e-06 -2.55269005407492 0.00044388900428082 -2.4777279963937 0.000499937420055584 0 5.98 6.46 7.12 6.26
"873" "Gcet2" 14 9.59 7.69 51.65 8.97 3.08 3.61 4.43 1.08 1.98 1.04 -2.04541652826309 1.71e-07 -4.26279087483291 8.91e-05 -3.38832175691677 0.000497342808998823 -4.31723865885529 5.78e-05 0 0 0 0 0
"874" "Cct2" 1206.74 1249.18 1213.81 1495.9 2041.09 2135.4 3338.35 3384.84 2423.17 1531.04 2103.61 1.07726956407571 1.73e-07 0.907951311261678 0.0206807263659579 0.245567664384546 0.668040669999317 0.703922949292075 0.0879896426769602 8.05 9.32 10.1 9.66 9.99
"875" "Clns1a" 265.47 309.53 242.34 316.1 466.2 466.79 720.29 729.34 533.29 573.5 475.52 1.07184085458829 1.76e-07 0.912284158342028 0.0201374797481818 1.01715736903864 0.00741542678674221 0.746869903786682 0.0647031680119983 6.83 8.58 9.72 10.3 8.87
"876" "Sel1l3" 6.69 3.97 7.12 4.13 0.61 0.69 0 0.6 64.94 17.73 1.56 -3.52751816065927 1.76e-07 3.56751790029587 1.4e-17 1.69460305190847 0.00639999773672333 -1.81197155012797 0.247613775104218 0 0 7.19 6.96 0
"877" "Gins2" 32.59 24.16 24.93 39.28 52.84 55.98 177.84 112.9 243.94 165.89 71.02 1.72388211731229 1.89e-07 3.01199629841559 3.4e-12 2.45569687727474 3.73e-07 1.2317672207999 0.0537359130444786 5.2 7.25 8.27 8.44 7.32
"878" "Nfatc2" 81.62 68.87 105.98 55.5 53.39 42.84 22.01 15.26 38.38 25.35 39.53 -1.224567559828 1.93e-07 -1.02298068509489 0.0803721159906989 -1.62134964939957 0.00343660593962796 -0.98038744147066 0.0863406532876722 0 6.62 8.07 7.32 7.68
"879" "Mcph1" 68.78 62.84 68.77 56.61 126.85 134.78 181.41 116.29 264.17 275.38 264.75 1.12193135279332 1.93e-07 2.03969827935071 8.16e-11 2.09965542536753 1.39e-11 2.04286232479846 5.14e-11 0 9.21 10.2 10.5 9.86
"880" "Gpr183" 610.97 542.79 536.52 503.17 388.07 332.92 90.37 182.81 102.05 159.73 160.3 -1.14163734590471 1.94e-07 -2.42585373281315 6.96e-06 -1.77949461441627 0.000875606159099471 -1.77435548969132 0.000701516648325065 0 0 0 0 6.58
"881" "Cxcr7" 32.32 45.85 27.33 14.78 10.63 9.66 3.24 2.89 1.87 2.58 0.45 -2.18669440132718 2e-07 -4.00721469268637 0.000234238051687811 -3.54288189715075 0.000663828845805035 -6.06225605624433 5.18e-06 0 0 0 0 0
"882" "Msh2" 213.85 202.84 207.6 247.13 313.17 382.63 627.67 473.9 471.88 428.95 313.61 1.04444729722833 2e-07 1.11505180108649 0.00196648982732838 0.977441266657696 0.00960473439291564 0.525603338033333 0.238296061463665 5.9 6.96 8.74 9.09 8.02
"883" "Ppia" 932.24 1442.68 808.63 1528.36 1566.12 2772.93 2349.18 2913.85 2588.42 3851.97 2502.57 1.02703497271596 2.04e-07 1.13575974649277 0.0010765431900151 1.70928448400994 2.87e-08 1.08709844041792 0.00161616731708485 8.23 9.06 10.6 11.1 10.3
"884" "Nebl" 44.59 34.47 38.93 33.32 23.93 12.53 2.04 5 0.4 1.12 4.32 -1.798420031604 2.06e-07 -6.56329162234009 6.09e-08 -5.07786479516985 5.34e-07 -3.13033221506399 0.000181529584726035 0 0 0 0 0
"885" "Cacna1h" 25.84 37.16 37.85 34.26 18.89 10.84 11.63 9.3 11.28 21.06 2.84 -1.41521547574628 2.06e-07 -1.58229548505999 0.0102652026955943 -0.681557116433068 0.333307081249997 -3.5720997179541 7.67e-08 0 0 0 7.27 0
"886" "Pde7a" 947.89 816.35 911.98 913.36 554.01 403.36 290.1 366.46 413.09 247.47 246.92 -1.1532370440687 2.07e-07 -1.11928700965387 0.0499885681547169 -1.85848950333106 0.000687780672818029 -1.86169944932443 0.000523287780242447 6.64 7.33 7.73 7.76 5.8
"887" "Uqcr11" 218.88 394.48 139.16 254.14 459.14 623.49 651.64 689.81 727.32 843.38 880.33 1.26786081719713 2.16e-07 1.53108565896703 0.000144732065376922 1.74467822039109 5.48e-06 1.806539843563 1.23e-06 0 0 8.67 8.2 8.24
"888" "Pde4c" 13.24 13.47 13.13 11.1 27.48 38.02 49.01 41.37 12.84 158.3 6.6 1.61356497189484 2.35e-07 0.0118462428481082 0.982333418415344 3.63579039075035 2.27e-24 -0.948261030028379 0.509467733313577 0 0 0 0 0
"889" "Ddx1" 322.42 306.22 305.74 404.62 477.96 575.3 891.97 793.16 636.33 741.96 546.95 1.03217196840175 2.45e-07 0.92669108400478 0.015301940875067 1.14825735588253 0.00130662582080386 0.708324898036655 0.0805837650566367 0 5.38 7.38 7.98 6.74
"890" "Fam53b" 230.72 243.02 222.77 177.77 237.3 328.6 657.95 498.23 350.61 415.7 214.38 0.977984863887614 2.5e-07 0.681771748489728 0.0718293390604853 0.927447351624767 0.00848956757060186 -0.0279250765805411 1 5.69 8.38 9.53 9.71 9.66
"891" "Plek" 953 889.19 815.12 942.83 633.45 479.84 199.1 306.2 164.3 137.08 513.9 -1.15331542294856 2.52e-07 -2.45364862487057 1.72e-05 -2.71496300818883 2.59e-06 -0.808493453015491 0.197602425324931 0 6.89 6.78 0 8.52
"892" "Got2" 134.96 140.58 138.88 151.96 192.17 229.63 426 359.06 297.19 262.92 334.84 1.09141610109332 2.59e-07 1.06961525025806 0.00613489406100223 0.892853568261951 0.0311651536612203 1.24170156069142 0.000646360492219988 6.22 8.37 9.83 9.87 9.05
"893" "Ube2t" 36.94 28.78 33.91 41.08 59.3 75.97 169.68 133.09 140.8 179.15 107.37 1.63833775489069 2.62e-07 2.00092247208343 8.36e-05 2.34844318165687 5.33e-07 1.60986608769632 0.0032483285781716 0 6.8 8.02 8.77 7.15
"894" "Cdkn2c" 83.01 107.99 49.21 80.15 109.92 147.28 254.14 276.22 122.1 93.41 167.17 1.29769581417256 2.7e-07 0.608369175562995 0.257411052514833 0.221954886154025 0.666456067578344 1.06162194266519 0.020381367898073 0 6.26 7.92 7.82 7.85
"895" "Inpp4b" 211 165.45 214.3 205.15 167.87 104.21 35.38 55.87 38.9 162.51 116.4 -1.13130668291439 2.73e-07 -2.35474511596366 1.13e-05 -0.292058679645006 0.731649336120678 -0.773496118041568 0.170689072217395 0 6.86 0 0 8.66
"896" "Psmd7" 218.19 169.45 180.13 202.22 254.23 306.73 764.89 319.22 481.54 387.43 280.12 1.09523735943341 2.78e-07 1.32281593375949 0.000272143469062837 1.00909596157955 0.0109018090671529 0.541205283203708 0.239837012463699 6.52 8.31 9.66 9.77 9.24
"897" "Mrpl18" 263.26 287.7 248.42 316.12 386.99 516.07 764.42 752.96 582.13 558.35 486.87 1.11757881826376 2.78e-07 1.06172276014883 0.00830973195189652 1.00155114614805 0.0145807006020912 0.803917998761899 0.0597553346801821 6.95 8.62 9.62 9.97 9.34
"898" "Pkd1l3" 17.92 18.08 22.42 12.21 44.14 51.99 53.7 25.33 84.51 102.58 18.95 1.31032035328869 2.78e-07 2.25884096793213 1.62e-10 2.53839647481336 4.14e-14 0.101916751894493 0.882762067651155 0 7.15 8.56 8.73 6.34
"899" "Atp5b" 2483.45 2704.7 2270.83 3207.45 3961.37 4590.33 7498.01 7916.24 4687.59 3548.54 4629.11 1.16790873466412 2.84e-07 0.813840900847242 0.0620969617851046 0.412220079711748 0.428909771403956 0.795729356191634 0.0626100226355418 0 8.18 9.16 8.55 8.39
"900" "Vegfa" 7.53 4.74 5.56 6.28 9.32 15.58 31.2 31.47 199.82 82.77 34.81 1.8608050606209 2.86e-07 5.05099743376782 1.62e-48 3.7794763064719 1.71e-19 2.52987016312116 1.4e-06 5.38 7.22 9.79 8.67 8.87
"901" "Mrpl42" 126.96 127.33 135.32 179.68 236.07 244.59 468.8 497.36 248.03 226.85 224.9 1.34564978316453 2.88e-07 0.801350871672821 0.162120172298338 0.672574901742697 0.260101010904279 0.66011990316977 0.260200689096697 5.03 6.86 8.33 8.26 7.88
"902" "Zbp1" 318.56 501.32 238.9 185.14 178.03 154.04 53.52 106.36 28.52 195.68 130.74 -1.33831010679205 3.17e-07 -3.44677591266197 1.87e-08 -0.668325490578469 0.437518394980135 -1.25012119726879 0.0447744982504918 0 0 6.28 0 6.79
"903" "Abcf2" 284.97 310.55 267.37 344.17 427.02 477.04 775.9 749.52 719.79 850.99 577.14 1.00915016521251 3.21e-07 1.25415057352061 0.000234253080347918 1.49571669326925 3.88e-06 0.935495838130308 0.0101431604494109 5.83 8.05 9.12 10 8.55
"904" "Srpk1" 349 319.28 350.15 364.11 603.8 589.39 889.68 720.99 913.4 850.16 634.22 1.02009309421604 3.24e-07 1.4019974733441 2.14e-05 1.29848506544756 0.000129356297563524 0.875734056884566 0.0187406157248777 7.39 8.24 9.52 9.82 8.86
"905" "Nfkbiz" 232.82 273.89 191.65 172 152.7 113.04 42.56 65.72 57.24 86.74 139.94 -1.2184968372236 3.26e-07 -1.92651667756397 0.000531066548723922 -1.32684290642754 0.0220217797236713 -0.636803857975884 0.383234190750183 0 7.65 8.04 8.73 8.25
"906" "Fcrl5" 384.62 332.2 334.82 300.59 318.92 173.77 46.89 71.64 17.24 19.65 77.51 -1.1455769033153 3.28e-07 -4.29343697498429 2.12e-12 -4.10466743692742 8.69e-12 -2.12481429683452 6.52e-05 0 0 6.03 0 6.55
"907" "H2-Ke2" 164.65 191.04 142.72 228.08 236.47 316.03 611.75 554.91 347.13 335.28 242.5 1.24268897614999 3.28e-07 0.934533112956282 0.054259495465378 0.884423487015828 0.0733370608550364 0.417041807734423 0.464076191889248 0 7.47 9.07 9.28 8.19
"908" "Gapt" 84.65 55.22 91.18 74.19 32.47 28.78 19.59 19.78 0.59 11.35 101.36 -1.60102693696564 3.32e-07 -7.0150133618893 3.45e-10 -2.74917982907287 0.00016233931794591 0.409544397889665 0.483162843078898 0 0 0 0 7.07
"909" "Fam102a" 234.61 216.11 273.38 236.9 145.66 121.54 61.79 109.55 67.76 76.92 62.44 -1.13182799159073 3.42e-07 -1.82603065121628 0.00045015628712177 -1.64310576320858 0.00155310618362236 -1.94399398857057 0.000144610181802087 0 6.78 9.35 7.98 8.03
"910" "5830405N20Rik" 506.29 420.22 432.97 363.15 308.65 229.68 93.73 120.36 214.24 280.02 81.51 -1.19500275885105 3.43e-07 -1.00731309057809 0.0910816672849562 -0.621011083217102 0.384536906142864 -2.40149198495927 1.11e-05 0 0 0 0 0
"911" "Usp1" 194.73 182.49 156.84 189.61 210.14 298.15 620.17 323.21 461.75 315.18 275.24 1.00430966031328 3.47e-07 1.35177999580186 4.36e-05 0.800844024920569 0.0367274024568061 0.605358183442884 0.128626216345459 5.4 8.89 9.85 9.85 8.92
"912" "Stip1" 431.38 340.23 379 436.48 539.7 617.86 1050.88 977.26 565.42 578.21 620.91 1.00522647126917 3.48e-07 0.511010877893623 0.257784704762002 0.543281522992742 0.216138003564647 0.64607212996077 0.111527933578041 0 6.82 8.34 8.39 8.37
"913" "Nob1" 129.82 113.13 142.48 130.78 218.12 245.69 372.22 319.98 344.08 285.99 317.59 1.16312388319819 3.55e-07 1.41478594686051 0.000213860406782379 1.14800661270452 0.0053952823399406 1.29920739732421 0.000808085482920277 7.24 8.11 9.57 9.81 9.07
"914" "Atp10a" 7.73 14.85 9.3 13.94 17.38 20.3 54.17 32.7 115.08 17.06 12.84 1.44267565782352 3.57e-07 3.32858776243461 1.24e-22 0.574640188013615 0.394873980101603 0.164667743817628 0.831307306187326 0 5.91 8.2 0 0
"915" "Cd83" 1177.56 1193.83 1064.91 1202.15 865.51 659.78 174.6 446.54 40.47 102.03 110.2 -1.11170366611127 3.62e-07 -4.84064613084092 1.48e-14 -3.50657747308135 1.33e-09 -3.39544666105183 2.35e-09 0 6.75 0 0 0
"916" "Rpf2" 102.97 108.34 86.79 121.1 171.33 213.18 265.26 290.57 266.85 232.5 249.39 1.16554377143075 3.67e-07 1.34839029445087 0.00052990339482924 1.14959199934531 0.0053952823399406 1.25076490049892 0.00139740189544717 6.03 8.65 9.63 9.78 9.04
"917" "Nfkbie" 610.22 637.4 709.48 500.88 408.53 311.14 187.64 220.76 123.01 121.6 157.09 -1.12361658298467 3.71e-07 -2.32062566870195 1.35e-05 -2.33725804299699 1.23e-05 -1.96780992698083 0.000148351403287648 0 7.05 7 8.36 6.63
"918" "Eif3l" 741.5 829.07 706.57 879.4 1233.27 1208.02 1806.26 2063.28 1353.52 1167.25 1380.38 0.999485727658646 3.78e-07 0.778372172189483 0.0450281849006805 0.56476955538321 0.181317993777587 0.806721442972682 0.0306960044689733 0 5.82 7.43 7.61 6.6
"919" "Orc1" 22.06 24.19 23.4 18.84 32.47 38.24 108.96 54.87 107.68 89.63 61.77 1.40624765575219 3.85e-07 2.28316398035206 1.17e-08 2.01846726705239 1.71e-06 1.48139190109515 0.00158728392075276 0 0 8.66 8.55 7.49
"920" "Stxbp1" 16.29 18.49 14.48 13.5 21.23 42.75 76.06 29.09 38.54 159.77 9.06 1.43021532789079 3.93e-07 1.29651121932762 0.00996922946397565 3.34807928154566 1.22e-23 -0.792262396921863 0.539214800056821 0 0 6.54 7.08 6.06
"921" "Gtf3a" 210.33 294.46 215.16 283.41 360.56 422.86 635.01 690.95 522.99 736.04 645.5 1.07197968695984 3.93e-07 1.06001593652139 0.00631035058136804 1.55301674679503 6.12e-06 1.36364967083659 0.000103008469039698 6.35 7.61 9.21 10 9.12
"922" "Ogn" 12.37 11.29 10.19 5.93 31.67 40.03 52.04 13.6 100.64 78.73 84.31 1.7876366874431 3.94e-07 3.33908864604555 4.48e-15 2.98487020205301 4.47e-11 3.08366048304772 3.1e-12 0 0 0 0 0
"923" "B230120H23Rik" 37.56 39.82 31.35 35.12 53.71 72.75 122.31 62.18 189.45 82.71 23.09 1.11211739609128 4.04e-07 2.39725191876942 2.39e-15 1.2015684521047 0.00166635284851898 -0.639225142852534 0.432044446070072 0 0 0 0 0
"924" "Sephs1" 87.68 89.84 75.17 94.51 112.24 141.84 228.7 224.18 182.52 169.62 111.12 1.02586164146138 4.1e-07 1.07228761111381 0.00348456121316953 0.96653934122049 0.0107439059332675 0.356351556649551 0.443985164480115 5.76 6.77 9.09 9.65 8.4
"925" "Cd28" 18.75 26.01 24.8 47.23 17.57 11.78 3.17 6.28 16.2 65.11 51.77 -1.58978819299395 4.16e-07 -0.849851032296453 0.281230295113545 1.15703429310686 0.0172787613524439 0.826271472792488 0.127102022005501 0 0 0 0 8.18
"926" "Adrb2" 344.81 307.51 352.5 348.53 200.81 173.73 99.92 129.22 48.93 77.72 45.85 -1.1646790833869 4.24e-07 -2.78967190076397 4.98e-07 -2.12210528261167 8.11e-05 -2.88346944971459 1.64e-07 6.14 6.8 7.65 8.31 7.79
"927" "Fasn" 203.35 234.12 291.98 228.96 417.77 432.75 779.39 370.52 714.49 843.97 764.31 1.06159527977153 4.32e-07 1.57627085829661 2.43e-06 1.81654875618153 1.75e-08 1.67351494505126 2.54e-07 8.85 9.65 10.7 11.2 10.1
"928" "Irak3" 184.31 156.09 184.83 165.1 90.82 78.63 59.87 62.74 84.47 48.64 6.31 -1.2410213986925 4.34e-07 -1.0307752253917 0.0801208905206414 -1.82707104763772 0.00104978330915998 -4.77350236609876 6.87e-13 0 7.62 8.99 8.13 6
"929" "Bend3" 29.16 34.36 34.52 31.51 53.34 58.32 108.88 69.21 103.65 66.85 43.72 1.16129964571374 4.37e-07 1.67821110092932 3.42e-06 1.04549044991326 0.0139326790973072 0.432856290604448 0.407783751085548 5.87 8.16 10.2 9.93 9.66
"930" "Inpp1" 151.85 185.82 148.88 152.9 92.75 69.6 30.4 50.4 44.18 39.45 16.49 -1.39498496444639 4.4e-07 -1.85536623221718 0.00314595909484814 -2.01873435067163 0.00130939830937791 -3.27716825213499 5.58e-07 0 0 6.79 0 0
"931" "Ndufa12" 232.55 142.65 128.83 208.57 334.03 390.24 441.45 577.16 490.04 530.7 460.99 1.2903088525007 4.44e-07 1.45980703197366 0.000693520302232652 1.57480406527832 0.000176940026837899 1.3716429719407 0.00147166287711793 0 6.83 7.81 8 7.37
"932" "Ift122" 18.12 14.39 16.45 15.91 27.42 39.29 63.88 43.47 58.7 59 54.38 1.4239613574408 4.54e-07 1.85580906451906 2.82e-05 1.86316351565821 2.46e-05 1.74552471254641 8.78e-05 0 6.98 8.63 8.73 7.69
"933" "Ptges3" 211.43 212.72 185.85 274.46 298.46 405.15 610.38 519.3 522.04 332.59 379.09 1.05156621431167 4.54e-07 1.2393634558796 0.000596877873689458 0.588947893669829 0.19798495346777 0.777743502191297 0.057620985328881 6.84 8.95 10.3 9.83 9.55
"934" "Ybx1" 566.22 707.04 531.87 596.34 863.61 1052.71 1435.43 1372.69 1398.91 1045.51 914.9 0.976225547082722 4.57e-07 1.22038536250368 0.000237537605244597 0.800289074914475 0.0308290117992219 0.607768182264828 0.113076134540049 5.98 7.66 9.97 10.3 9.53
"935" "Epha2" 3.71 5.81 9.82 7.94 8.42 17 34.8 34.16 106.16 3.98 168.03 1.79063752711267 4.76e-07 3.96032472634602 2.54e-24 -0.777003308480524 0.652892787702444 4.62280328464434 3.45e-40 6.42 8.95 10.4 6.16 10.9
"936" "Scand1" 114.44 843.93 326.39 276.42 140.72 157 82.96 176.48 298.26 163.71 331.04 -1.48647329404667 4.79e-07 -0.387994471670724 0.812553269035167 -1.25342253124069 0.0665858369807719 -0.237559430474479 1 0 7.23 8.23 8.63 8.21
"937" "Gpr171" 424.56 363.95 356.51 465.32 302.78 197.25 70.67 164.7 117.59 131.81 165.14 -1.13076424303856 4.88e-07 -1.77552804277143 0.00078930724064182 -1.61083359245738 0.00231865521095195 -1.28560380924915 0.0141363264165579 0 0 0 0 5.9
"938" "Tlr12" 26.26 47.41 46.39 39.66 12.96 14.71 8.86 12.59 11.78 22.75 307.11 -1.70116251126287 4.98e-07 -1.76113353280259 0.0210858718079252 -0.811606526659627 0.34525211005963 2.94321051248686 4.42e-21 0 0 0 0 8.15
"939" "Gm8369" 540.69 496.36 480.56 376.12 320.66 222.77 91.23 177.48 95.65 120.47 19.59 -1.22143030051517 4.99e-07 -2.3073218733252 3.98e-05 -1.97448482246087 0.00040644978129633 -4.59496944429109 7.3e-13 0 0 0 6.11 0
"940" "Mettl13" 62.78 72.35 76.44 94.04 129.41 138.34 239.61 177.72 176.76 253.24 169.03 1.16458071695824 4.99e-07 1.21010008499891 0.00329098208652604 1.72881354946534 1.76e-06 1.14558757228216 0.00538170355882552 6.84 8.14 9.34 9.79 9.44
"941" "Cox7a2" 535.1 606.7 292.3 454.97 717.69 992.15 1015.57 1086.15 1069.82 1538.19 1046.04 1.01270542442751 5.03e-07 1.17969191767651 0.000646667733100201 1.70355755642542 5.65e-08 1.14726185834056 0.000768321693978503 0 0 7.84 7.99 6.97
"942" "Hspe1" 603.99 584.75 304.4 410.89 936.7 1134.83 875.4 894.36 810.11 961.92 1089.44 1.01253467491672 5.03e-07 0.767133511350267 0.0384249071916559 1.01493260947327 0.00379926801644999 1.19453053340846 0.000326396752024764 7.78 9.52 10.8 11.6 10.4
"943" "Mar-01" 1193.94 842.41 884.15 978.68 733.19 485.58 171.45 366.54 89.24 92.34 39.71 -1.15025364536682 5.13e-07 -3.44933643239354 1.65e-08 -3.40007121358831 2.56e-08 -4.61752458511321 1.19e-12 0 0 0 0 0
"944" "Cd209a" 7.33 16.9 25.85 35.24 5.54 3.5 1.54 2.28 0 0.75 1.58 -2.72999332301262 5.2e-07 NA 0.00108070276979273 -4.82984955984469 0.00388991938683672 -3.75488750216347 0.0094212954426288 0 0 0 0 0
"945" "Fmnl3" 310.42 306.39 353.76 301.37 202.97 177.67 93.9 122.29 89.15 80.12 14.07 -1.09163865694771 5.21e-07 -1.83465200928881 0.000433467480742666 -1.98872438598846 0.000141233732586177 -4.49826447856463 6.37e-14 0 0 7.41 7.29 5.83
"946" "Galnt7" 101.87 77.06 82.65 84.35 153.12 176.67 248.73 141.1 222.26 238.82 452.98 1.05675514955676 5.23e-07 1.36176819714356 9.13e-05 1.4654435266597 1.7e-05 2.38896722010624 9.52e-17 4.86 8.83 9.6 9.05 9.03
"947" "Pole2" 81.96 70.47 66.86 67.99 117.02 154.26 203.92 200.22 226.92 288.38 234.04 1.23332734180112 5.54e-07 1.65972621100626 2.56e-05 2.0055135547945 4.09e-08 1.70429756515461 9.09e-06 0 0 7.51 7.89 6.22
"948" "Egfl7" 13.91 4.3 4.5 7.02 18.43 19.42 49.22 45.84 113.72 103.17 123.84 2.16045828710361 5.61e-07 3.93549463576988 9.02e-15 3.7950321533403 2.56e-13 4.05848600823677 2.08e-16 0 0 7.36 7.73 6.71
"949" "Mrpl34" 130.9 177.49 139.51 175.64 233.47 359.77 448.04 487.59 408.76 343.94 318.82 1.29391172256846 5.61e-07 1.39077191377061 0.00173355702057004 1.14167479842424 0.0170458659625471 1.03226002263407 0.0318185817535197 0 7.71 8.84 9.06 8.55
"950" "Plekhg2" 191.05 159.35 298.49 189.32 96.44 90.98 103.75 102.17 73.99 90.38 13.2 -1.09153482718488 5.61e-07 -1.50190952929847 0.00284225214163461 -1.21323627106775 0.0161171147126994 -3.98870189849294 3.55e-12 0 7.5 8.6 8.21 7.05
"951" "Tspan2" 61.78 69.53 64.77 67.9 28.22 22.5 30.97 18.52 17.05 19.9 389.42 -1.3974021474748 5.72e-07 -1.95258498600261 0.0017037921263599 -1.72958829448314 0.00503325479664932 2.56089835014923 1.52e-18 0 0 6.18 6.84 7.48
"952" "Snrpf" 78.75 113.12 45 67.6 102.31 262.9 260.7 174.97 351.49 211.8 218.78 1.39528600866717 5.73e-07 2.20718356107146 4.45e-08 1.4764025056434 0.0015156057157669 1.52318077501203 0.000736526692231001 5.8 7.48 9.38 9.13 8.98
"953" "Psmg1" 117.73 109.13 91.49 114.29 180.96 213.83 367.11 278.52 308.48 316.92 206.72 1.26592707575029 5.79e-07 1.51200989994778 0.000311857134564845 1.55095165060606 0.000190499471570723 0.93451091841174 0.0490566504370474 6.22 7.59 8.86 9.05 8.4
"954" "Mxi1" 28.58 26.18 29.07 35.42 45.74 58.36 92.67 79.09 67.58 34.9 61.51 1.20994701327562 5.83e-07 1.18067898938357 0.00683552336685782 0.227309675316778 0.744496207328996 1.04490361482337 0.0198174903533681 6.22 6.67 10.3 9.91 9.88
"955" "Fkbp11" 45.96 30.83 43.64 91.53 214.86 157.89 138.31 162.9 111.4 300.37 297.32 1.66887093648877 5.91e-07 1.07195720018406 0.117595980870035 2.50294869576265 6.43e-08 2.48822448063505 4.86e-08 0 6.61 8.39 9.21 8.47
"956" "H2-Gs10" 1061.78 1833.88 1365.54 1081.21 739.22 663.74 423.68 597.67 882.29 649.94 703.56 -1.13991650888087 6.19e-07 -0.598165860532337 0.416986903362274 -1.03911225371652 0.0791871142284263 -0.924745331292737 0.120454117752412 0 0 0 0 0
"957" "Irs2" 159.58 272.7 146.56 95.23 126.45 80.17 33.89 41.03 56.5 30.74 9.92 -1.25955850960996 6.21e-07 -1.576575645783 0.00812134691511159 -2.45470934828214 2.53e-05 -4.08641448758604 5.79e-11 5.1 6.8 9.12 8.93 6.64
"958" "Snord15b" 33823.29 28105.21 10178.16 11107.8 92631.81 53473.6 5144.77 10128.02 26276.95 25880.45 37171.97 0.955539553982848 6.33e-07 0.336963585671338 0.225063508097212 0.315028458409702 0.236669587247143 0.837380904418804 0.00487357138776483 0 0 10.4 10.3 9.8
"959" "Ahsa1" 615.88 703.97 500.89 658.1 887.08 1078.43 1458.33 1425.07 1013.01 1306.16 1178.18 0.967995322530164 6.39e-07 0.70898326210172 0.0655295414700528 1.07566647899703 0.00188428026516769 0.926894814315694 0.00826149711839323 6.32 8.74 9.75 10.3 9.25
"960" "Myl4" 183.32 190.72 132.38 162.63 159.42 336.06 470.6 527.79 894.41 2223.08 47.71 1.15886867026032 6.46e-07 2.41882228682313 9.9e-14 3.73237392958887 3.29e-43 -1.80975044014423 0.0137494491449316 6.03 7.16 8.06 8.41 7.35
"961" "Il27ra" 346.3 291.63 419.96 306.81 237.29 176.05 76.02 145.01 40.37 150.04 139.56 -1.10518738920576 6.46e-07 -3.07915644341966 2.7e-08 -1.1851647672387 0.0255222912706753 -1.2896264327058 0.0122241099488847 6.28 7.34 7.96 8.37 7.9
"962" "Eif1a" 254.69 260.95 205.17 277.41 470.22 435.35 525.88 546.56 525.18 482.72 639.36 0.986620005190596 6.67e-07 1.07345416682141 0.00231802137618053 0.95182879211593 0.00918493063593695 1.35727067876165 2.77e-05 5.38 9.91 10.8 10.9 10.6
"963" "Dck" 290.44 182.07 204.02 237.77 278.08 369.95 708.47 446.05 497.76 325.24 210.92 0.97929975320203 6.73e-07 1.12278268010863 0.00123846930458617 0.508837079888611 0.234123630367755 -0.115971718045918 1 0 6.4 8.05 8.77 7.91
"964" "Rpa2" 202.68 216.49 176.25 204.94 239.55 297.53 574.65 519.63 501.38 379.66 285 1.02735421173342 6.76e-07 1.32525538161381 0.000167946729446248 0.924058941589536 0.0185287851646978 0.510312852538045 0.250359714294605 0 0 7.87 8.1 6.84
"965" "Ftsj3" 416.99 366.86 435.71 547.32 625.34 704.74 1146.79 1071.99 904.41 1107.42 721.72 1.00615160156094 6.91e-07 1.03384478840303 0.00572079827594124 1.32599842161349 0.00012251174435682 0.708307079117821 0.0893448897805043 6.44 8.91 10.1 10.6 9.63
"966" "Foxj2" 167.47 153.68 193.66 138.28 112.51 85.89 45.46 55.67 27.42 32.13 52.99 -1.12458131199029 7.06e-07 -2.57398134189216 2.41e-06 -2.34528893219997 1.42e-05 -1.62348978562805 0.00187515871955551 0 5.3 0 0 6.96
"967" "Thoc3" 127.24 149.94 127.74 170.35 201.21 223.48 418.7 355.29 378.93 189.13 164.01 1.05913542623878 7.26e-07 1.39769212649434 9.39e-05 0.395138986781282 0.447659252959259 0.189544544904993 0.771829805089059 5.71 6.98 8.52 8.01 7.45
"968" "Bcl3" 142.19 156.87 145.88 106.76 73.72 53.15 30.22 47.62 17.74 29.66 35.71 -1.43030240132401 7.63e-07 -2.95880606571939 1.03e-05 -2.21729347756583 0.000601830303776861 -1.94948394143439 0.00208343417551578 0 5.35 0 8.2 7.36
"969" "Gbp9" 716.87 811.38 651.59 609.74 487.87 358.99 137.59 295.34 65.71 302.11 196.16 -1.12414082715547 7.69e-07 -3.4077911734579 4.56e-09 -1.20690208187333 0.0377159473871223 -1.82994513655335 0.00075448925069324 0 7.27 7.45 8.18 8.25
"970" "Usp44" 1.23 0.81 0.91 0.6 5.27 6.69 12.38 6.21 76.13 30.54 0.79 3.10528145031405 7.8e-07 6.42257414847219 1.2e-32 5.10480913240481 1.9e-14 -0.167894466214942 0.868843276954301 0 0 6.97 6.89 5.91
"971" "Scml4" 217.92 184.51 232.99 205.87 138.51 105.4 62.6 85.8 167.2 101.14 43.65 -1.10060908552926 7.82e-07 -0.331028348357325 0.687833946779031 -1.05624951219829 0.0504962419153384 -2.26854963680877 1.34e-05 5.57 7.83 7.97 7.32 6.7
"972" "Cct5" 1706.46 1722.38 1347.75 1932.69 2514.39 2872.2 3927.59 4319.7 2601.66 2738.03 4083.46 1.02296633178357 7.84e-07 0.633274481342624 0.130751115055554 0.706980300692228 0.0837252399309517 1.28363414240257 0.000191400881610244 7.3 9.37 10.3 10.3 10.3
"973" "S1pr2" 21.89 19.09 12.36 60.77 10.72 10.69 5.67 5.29 52.26 15.39 22.86 -1.81769595670955 8.08e-07 0.8733538024013 0.157615884293958 -0.890360090590511 0.318505850045706 -0.319527918704243 0.839872463695116 0 0 10 6.93 8.17
"974" "Tubb2b" 32.68 52.82 29.25 38.74 63.73 90.15 119.36 115.6 42.03 26.59 42.01 1.34103197083864 8.15e-07 0.131346695716272 0.831090395712921 -0.529188983578034 0.74956438577893 0.130660025050815 0.811245403706828 0 7.81 7.35 7.33 8.44
"975" "Dtx1" 493.27 658.12 660.02 547.12 433.3 305.54 140.28 246.7 20.45 483.54 19.21 -1.06691176898132 8.38e-07 -4.84964329836602 7.04e-15 -0.286180807585378 0.758676696852645 -4.9398866225296 2.32e-15 5.61 7.47 7.65 11.3 6.99
"976" "Itgal" 536.33 435.47 562.6 423.4 328.57 297.51 212.36 102.34 280.06 178.68 253.46 -1.05730409784009 8.43e-07 -0.805425545161728 0.172715669943613 -1.45378332839713 0.00633782546305023 -0.949403403072212 0.084255489501992 0 0 7.43 0 7.29
"977" "3110082I17Rik" 24.8 31.88 31.15 16.38 44.42 63.21 126.87 73.72 160.11 99.61 66.48 1.56446675412699 8.57e-07 2.61956969176835 1.62e-09 1.93486876364297 0.000122105194244263 1.35149856182922 0.0160433744705484 7.31 8.48 9.66 10.2 9.05
"978" "Zfp608" 331.05 264.79 249.2 194.34 154.34 123.92 106.64 84.23 69.44 57.25 30.82 -1.1476635371116 8.7e-07 -1.90381244569283 0.000510648214667929 -2.18230370026564 7.14e-05 -3.07571253162252 3.49e-08 0 8.57 9.63 9.18 8.98
"979" "Pabpc4" 100 98.48 121.14 121.52 168.59 210.26 317.7 235.29 388.47 248.3 216.99 1.07884567912355 8.83e-07 1.81656660778326 3.81e-08 1.17084767998906 0.00261365417668384 0.976391975969695 0.0154920878615297 0 8.21 9.55 9.54 8.96
"980" "Morf4l2" 218.5 226.53 177.53 231.34 348.63 376.42 503.3 495.35 446.16 451.83 508.6 1.01336967233907 9.12e-07 1.06349404998247 0.00405837364236405 1.08171293792539 0.00332241656099899 1.2524643359193 0.000291756342203761 7.33 8.91 9.61 10.2 9.65
"981" "Exosc2" 200.34 178.94 194.74 224.06 301.5 307.69 559.21 493.21 524.08 509.57 344.86 1.05797652844146 9.41e-07 1.39325368345544 0.000112762718441517 1.35274697378722 0.000212297285961154 0.789477431327348 0.0630226782946282 0 8.6 9.93 10.1 9.33
"982" "Chchd2" 402.22 489.57 299.06 440.29 694.1 819.79 768.85 1013.09 756.57 1207.36 730.41 1.01476121653408 9.63e-07 0.891664862743472 0.021031015918827 1.56597529715387 1.99e-06 0.840897809202817 0.0272154842850382 0 7.5 8.07 8.69 7.55
"983" "Tada2a" 42.19 35.51 48.85 42.25 65.57 104.78 154.16 99.1 207.12 194.5 175.61 1.32742174283974 1.01e-06 2.29515196630556 1.25e-09 2.20445525116637 1.17e-08 2.05706009652085 1.44e-07 7.11 7.3 8.9 8.92 8.29
"984" "Bend5" 317.82 328.02 264.69 284.79 192.59 133.77 68.88 120.35 58.14 39.01 4.91 -1.21310070722441 1.01e-06 -2.36172201316901 3.25e-05 -2.93740908628068 4.72e-07 -5.92745815499055 4.17e-16 0 0 6.32 6.46 0
"985" "Lipc" 44.04 38.57 28.35 50.32 13.81 19.45 4.35 5.29 0.63 0 0.61 -1.91051799111301 1.01e-06 -6 5.79e-06 NA 4.25e-07 -6.04654258593703 3.33e-06 0 0 0 0 0
"986" "Kbtbd11" 137.92 101.76 147.05 151.68 98.2 77.09 34.76 49.55 23.69 86.84 60.42 -1.05241482233263 1.03e-06 -2.5063551019789 2.25e-06 -0.632273574603989 0.271975772483042 -1.15560711649119 0.0231060491610108 0 0 0 0 0
"987" "Plk2" 43.56 58.42 16.25 20.25 98.88 88.16 62.11 68.92 77.48 28.56 7.94 1.19966667512448 1.04e-06 1.16221822923661 0.00516127708307306 -0.277609745337539 1 -2.12439481222368 0.0201610091616599 0 0 6.99 0 0
"988" "Neat1" 823.19 704.9 1070.62 673.26 428.99 376.88 415.1 338.8 93.36 197.22 429.48 -1.06882621220728 1.05e-06 -3.13121114930447 2.32e-08 -2.05228175321035 0.000117787509347706 -0.929496665874275 0.0887625496098429 0 7.5 8.46 8.22 9.98
"989" "Clec2d" 4451.28 4549.77 2851.45 4115.33 2096.49 2154.27 766.59 2006.31 797.83 1109.07 3769.67 -1.18487335238401 1.05e-06 -2.32294308346993 0.000122824604294589 -1.84774593580718 0.0023590223809767 -0.0826581269240765 1 0 6.97 7.97 7.82 7.9
"990" "Dstyk" 89.11 91.29 89.3 79.13 54.97 42.41 27.25 28.54 35.12 73.6 70.19 -1.18739036227374 1.06e-06 -1.31215936980226 0.022210003925619 -0.244746448393246 0.880833169241961 -0.31318671089879 0.775304882701393 4.96 6.69 6.88 7.78 6.73
"991" "Hadh" 150.29 131.24 128.65 145.85 221.08 224.4 387.34 344.6 318.96 261.58 166 1.08239440979175 1.07e-06 1.19821278634151 0.00202305127248972 0.912089514727131 0.0310422622496291 0.256020517465828 0.638803525071167 0 6.44 8.33 8.11 6.9
"992" "Havcr1" 37.07 27.34 25.21 50.52 13.36 14.15 3.33 5.94 0.59 4.87 150.48 -1.92987541648166 1.07e-06 -5.89193813153176 1.11e-05 -2.84680321881126 0.00305056347076811 2.1027029526296 2.91e-07 0 0 0 0 7.25
"993" "Nup37" 105.81 99.07 81.62 103.76 131.09 164.08 298.57 296.16 277.6 266.1 222.25 1.18920762619286 1.07e-06 1.50857196770384 0.000184254334827393 1.4475329101478 0.000448798276955214 1.18774781884271 0.00559520986885358 0 5.82 7.59 7.72 7.28
"994" "Ddx21" 568.46 465.37 576.79 609.82 872.85 940.87 1674.69 1042.14 1173.21 645.51 785.56 1.02884061348807 1.07e-06 1.07961568544844 0.00410099556189379 0.217665762710921 0.730271633475036 0.500947788117026 0.284608330488156 7.43 9.75 11.1 10.7 10.5
"995" "Hsp90ab1" 4363.07 4139.15 3560.23 4195.92 7554.44 8562.03 14326.99 10189.37 9633.46 5380.42 7373.61 1.32146322330502 1.12e-06 1.24494333581984 0.00460455997731471 0.40460807449613 0.444491648183333 0.859260391757723 0.0629575845135789 7.94 9.43 10.6 10.7 9.71
"996" "Mybbp1a" 556.89 522.49 625.92 599.42 866.57 958.93 1945.57 893.74 1451.76 1737.74 826.84 1.01722683204577 1.14e-06 1.33321148308258 0.000133090888036077 1.59262075426266 1.66e-06 0.521088600203665 0.25409464506125 6.07 8.59 10.2 11 9.72
"997" "Pcsk4" 3.36 4.28 4.97 4.58 13.45 17.75 24.48 21.82 48.44 22.54 25.6 2.1726267655709 1.14e-06 3.49462932021627 2.76e-10 2.39091797069416 0.000530095673992604 2.5745742654093 8.04e-05 7.13 8.56 10.5 9.25 10.3
"998" "Snrpd2" 504.97 614.33 330.95 601.24 753 1001.41 1013.41 1496.35 899.37 1106.36 1074.28 1.05559283345785 1.15e-06 0.810314544578832 0.0547171884353628 1.10914878066388 0.00414190474834335 1.06669794409293 0.00503063048572083 0 7.32 8.52 8.75 8.21
"999" "Stac2" 37.64 36.43 76.97 76.17 115.72 110.26 201.81 106.86 81.07 88.17 10.75 1.23456843112088 1.16e-06 0.513213715836257 0.46104117328243 0.634333432476379 0.324051663245465 -2.40161776741929 0.000260077596812436 0 6.73 8.66 9.01 7.16
"1000" "E2f3" 42.9 37.96 47.79 40.87 66.36 65.95 147.7 86.25 147.85 58.85 60.61 1.11141265716529 1.18e-06 1.80267875063552 2.37e-07 0.473658827553637 0.381095643104979 0.516172254836285 0.311788481379713 5.68 8.56 10.4 9.6 9.76
"1001" "Rgs18" 122.16 106.01 94.08 99.66 49.66 39.07 15.12 44.45 25.3 24.5 4.41 -1.50841668454888 1.18e-06 -2.0597259923092 0.00274368359474226 -2.10608162800094 0.00220062086455241 -4.58001281633335 1.29e-08 0 0 4.81 0 0
"1002" "Zyx" 118.91 128.36 157.01 124.35 75.74 52.35 36.46 52.79 22.26 50.58 39.84 -1.28230458341621 1.18e-06 -2.56973280312927 2.7e-05 -1.38561935880799 0.0203623277350505 -1.72996874840315 0.00297475316967201 4.97 0 0 0 6.25
"1003" "Pigr" 37.97 31.03 17.85 23.72 11.64 9.97 2.96 6.51 2.19 2.02 3.34 -1.8309015958626 1.19e-06 -3.65788532466913 9.76e-05 -3.77446090151851 4.86e-05 -3.04896809179625 0.000477516702998776 0 0 0 0 0
"1004" "Ncr1" 88.35 102.05 64.65 124.21 57.48 34.04 8.31 26.85 4.94 11.39 12.8 -1.58199844823143 1.19e-06 -4.26253236867494 1.04e-06 -3.05734756855151 8.78e-05 -2.88897150537226 0.000153222261159261 0 0 0 0 0
"1005" "Ffar1" 181.93 173.27 253.95 155.1 72.88 79.28 53.84 65.26 52.08 60.28 3.89 -1.49436832362156 1.19e-06 -1.87524329349606 0.00679655900465658 -1.66429332506387 0.0149398155190385 -5.6181306816755 8.41e-10 0 7.09 7.98 8.68 6.44
"1006" "Nop56" 627.25 630.28 629.54 784.92 988.37 1095.05 1629.57 1540.64 1968.01 1831.98 2037.81 0.975399990157584 1.21e-06 1.55882294293194 1.18e-06 1.45548914490895 9.91e-06 1.60910493622059 2.91e-07 8.35 10.5 11.8 11.9 11.2
"1007" "A530023O14Rik" 158.68 156.03 167.12 138.83 117.11 57.66 22.75 66.74 5.22 20.85 19.85 -1.23184510437858 1.23e-06 -4.89360955377192 2.39e-12 -2.89568388200978 1.28e-06 -2.96659225831148 5.58e-07 0 0 0 0 0
"1008" "Atp5o" 359.89 388.33 340.96 409.91 558.87 674.68 929.9 949.39 670.03 764.11 618.45 1.05414442404226 1.26e-06 0.838210597387961 0.0489691125553444 1.02776524615965 0.0101567773300488 0.722641866925459 0.0948577515729954 0 7.69 9.08 9.27 8.12
"1009" "Rpl14" 2542.56 3415.82 1543.12 2888.7 4152.99 5871.36 3811.33 6341.31 4648.89 3990.97 6326.58 0.957487544677649 1.29e-06 0.839734770141916 0.0193541534239656 0.619587914494902 0.100257036855541 1.28427430374376 7.07e-05 7.46 8.46 10.1 10.2 9.59
"1010" "Gm6251" 4366.67 5160.89 2725.07 4512.97 7053.3 10110.93 5538.38 10072.62 6287.4 6684.24 8491.85 0.967101789989076 1.29e-06 0.585031339802209 0.127080996936565 0.67333132531898 0.0727780654090322 1.01864667822416 0.0027104300122727 0 0 0 0 0
"1011" "Epn2" 12.63 15.04 17.6 19.16 29.97 34.26 66.42 39.43 13.46 60.71 2.5 1.40040900210967 1.34e-06 -0.259054184811114 0.972379622779949 1.91420157842932 1.8e-05 -2.68773259475934 0.00484270324389256 0 0 7.11 7.59 0
"1012" "Abca1" 500.85 409.31 485.19 394.05 339.09 242.5 123.21 130.99 91.9 95.61 119.42 -1.09826351907126 1.34e-06 -2.28326724975417 9.58e-05 -2.22617059143156 0.000139272885431072 -1.90535954255467 0.0008353246701495 5.22 7.29 7.99 7.61 7.89
"1013" "Gar1" 78.88 100.55 89.86 54.4 123.7 206.53 324.55 112.99 350.06 222.01 110.48 1.24606139316243 1.34e-06 2.11298942404468 9.45e-09 1.45601186540844 0.000558101894108778 0.44917242874217 0.398912991230244 8.69 9.05 11.1 10.8 10.1
"1014" "Bub3" 309.78 358.61 308.72 372.25 475.95 465.01 794.78 892.3 545.67 627.08 420.25 0.961711933532723 1.36e-06 0.693825333317357 0.0899657876098059 0.894446111530917 0.0189474954732529 0.317044423785045 0.51390198574979 0 6.63 8.02 8.27 7.27
"1015" "Card6" 405.77 254.11 293.23 272.91 213.64 168.08 100.93 94.18 124.27 98.32 322.83 -1.08776440993932 1.39e-06 -1.30243255106328 0.0185597562745091 -1.64035378789339 0.00235991180150736 0.0748640431337839 0.871946263032875 0 0 6.56 6.65 7.19
"1016" "Dclk2" 130.56 132.29 170.07 99.04 84.56 66.43 41.79 45.35 22.31 31.37 7.41 -1.15956838323978 1.39e-06 -2.57555534964228 5.66e-06 -2.08386033404282 0.000177649250931906 -4.16570041558059 2.76e-11 5.72 7.18 8.07 8.33 0
"1017" "Mbnl3" 98.63 77 90.04 77.18 126.92 134.5 283.16 122.88 180.08 121.84 59.38 0.96110385837053 1.4e-06 1.07106043970093 0.00237412581395339 0.507410324734065 0.237484306986928 -0.529528523766572 0.444092648037077 0 5.59 8.17 8.57 6.46
"1018" "Anapc5" 647.79 682.51 702.7 855.89 963.14 1160.95 1854.82 1761.49 1298.87 1783.99 1983.14 0.990635998056523 1.41e-06 0.846741771413282 0.0342912146863226 1.30459225679856 0.000192961966228963 1.45727125680548 1.12e-05 7.41 8.01 9.57 10.1 9.22
"1019" "Gm6402" 466.8 705.54 456.01 792.94 865.55 1355.1 955.18 1584.05 1531.19 1161.71 1403.2 0.975149320091755 1.46e-06 1.33887743039646 6.77e-05 0.940474088306794 0.0124567367172759 1.21294477037549 0.000359375559286564 0 0 0 0 0
"1020" "Nup205" 342.34 354.21 326.08 348.14 477.45 573.76 975.44 663.24 856.88 745.96 792.16 0.972560653412098 1.47e-06 1.32217856113269 8.96e-05 1.12218365401767 0.00152322802188159 1.20887723632629 0.000364704011285086 6.28 7.9 9.8 10 9.19
"1021" "Hspa8" 2630.1 3110.29 1587.79 2948.7 3959.6 6186.39 4351.47 7233.88 3907.21 6214.04 9287.62 1.08037479954307 1.57e-06 0.60480836562634 0.154388394006735 1.27420109596155 0.000619325806013728 1.85397851379689 6.04e-08 5.5 9.28 10.4 10.7 10
"1022" "Nnt" 138.75 146.78 87.23 78.98 185.29 236.17 248.3 186.79 101.84 77.41 268.34 0.923044799186122 1.57e-06 -0.149188340689068 1 -0.544900810890493 0.573621944735971 1.24856946037492 7.03e-05 0 6.78 7.97 6.9 7.92
"1023" "Hs3st1" 80.29 53.16 75.72 78.91 49.37 30.17 7.66 10.85 28.62 9.89 21.53 -1.55487996911077 1.65e-06 -1.33137392746361 0.0932520369012321 -2.86435517343117 0.000324587336578197 -1.74204928002305 0.0205808116591188 0 0 0 0 6.65
"1024" "Lrba" 448.7 400.02 455.48 330.51 296.34 223.51 137.28 112.34 201.3 148.83 267.6 -1.08709773701447 1.65e-06 -1.02161564479158 0.101649458657914 -1.45729745398644 0.0125087987765147 -0.610884701071456 0.397849497547518 6.98 8.08 9.14 8.59 8.73
"1025" "Cnrip1" 43.95 48.89 40.58 39.74 14.85 10.79 9.87 6.16 3.13 4.33 0.76 -2.05502470050981 1.7e-06 -3.78979923827974 0.000613665453977894 -3.32159487048563 0.00164080879459667 -5.83189057176877 1.91e-05 0 0 0 0 0
"1026" "Rundc2a" 1047.58 827.65 932.27 731.21 661.48 512.32 260.37 242.85 248.15 188.07 622.49 -1.07732364217669 1.71e-06 -1.83393917689404 0.000625200755365202 -2.23388189592165 3.53e-05 -0.507100970358462 0.481023382929781 0 0 0 0 0
"1027" "Tgtp2" 68.61 264.15 89.64 101.01 68.14 59.3 20.76 56.75 57.36 152.62 144.15 -1.35266949805978 1.74e-06 -1.18982455888002 0.0787640330538542 0.222002543669223 0.541978956839033 0.139629348800347 0.661180130344552 0 0 0 0 0
"1028" "Slc4a3" 6.26 5.65 7.03 4.59 0.82 0.93 0.17 0.92 2.17 0.5 2.9 -3.05053848571962 1.76e-06 -1.43873437277982 0.396085052575651 -3.55642941544957 0.0334792913852835 -1.02037651520936 0.59868884192844 0 0 0 0 0
"1029" "Parp4" 304.69 258.65 314.41 229.27 207.1 147.74 109.12 72.71 114.52 96.47 69.94 -1.0445741384054 1.77e-06 -1.27300980627253 0.0193966200822839 -1.52045711018985 0.00439640816269114 -1.98441968057416 0.000140465257129146 0 6.38 7.37 7.17 5.9
"1030" "Snrpb" 636.85 817.21 760.15 845.3 987.48 1119.01 1916.45 1913.71 1430.55 1275.42 1150.37 0.956348445736168 1.79e-06 0.903269308405699 0.018156911978182 0.737671794920588 0.0712655908221287 0.588797343337402 0.166432318802554 0 8.2 9.56 9.66 9.15
"1031" "Cd180" 1769.9 1580.54 1678.68 1179.48 1037.09 895.26 502.31 477.31 568.66 340.53 286.76 -1.09227249398896 1.85e-06 -1.44862975387264 0.013443870614707 -2.18841417907332 0.000137278715658757 -2.43635228409722 1.71e-05 0 0 9.19 7.51 8.66
"1032" "Supt16h" 430.36 366.75 377.69 404.03 488.08 611.31 1308.57 642.84 817.52 932.32 582.36 0.950331767022828 1.95e-06 1.05047009273554 0.00314529611197883 1.24004128306291 0.000272807183930306 0.561127333200945 0.169876610229655 0 0 0 0 0
"1033" "Phb" 84.61 139.42 103.66 135.99 176.31 237.04 275.32 305.74 300.93 416.82 303.77 1.10071130450628 2e-06 1.37629843748398 0.000375313938752774 1.84629500315733 1.11e-07 1.38984989784983 0.000242684501235288 0 8.12 9.38 9.72 8.94
"1034" "Hmgb3" 21.15 28.85 21.01 13.92 29.26 52.63 93.12 70.36 78.64 30.19 11.31 1.5306127145551 2.01e-06 1.88898907171368 0.000244506965911134 0.507796506886722 0.440321839887432 -0.908675320637083 0.603465159682741 0 0 7.43 7.95 0
"1035" "Prdx1" 768.09 778 531.46 905.19 1119.87 1310.68 1453.93 1808.42 1327.43 1480.96 1464.19 0.932525531884829 2.01e-06 0.831997558647727 0.02556180054963 0.989894448609547 0.00539121734630363 0.973464550424199 0.00519054697615756 6.02 8.06 9.35 9.72 8.89
"1036" "Aven" 79.39 71.75 92.07 88.33 149.23 167.92 248.03 210.63 166.16 139.75 168.71 1.22652043128758 2.08e-06 1.00339018060953 0.0414093856797544 0.753665342382794 0.165524918783981 1.02536254878352 0.0304920752271579 5.57 7.54 8.39 8.61 7.73
"1037" "Slamf7" 368.13 363.69 326.22 363.75 403.84 510.3 947.05 841.06 920.45 900.57 190.96 0.926452759491748 2.09e-06 1.37270286681567 2.45e-05 1.34120193120167 4.49e-05 -0.896366016349147 0.112128482548329 0 7.25 9.15 8.99 7.41
"1038" "Socs2" 6.52 8.6 4.82 10.77 14.4 19.14 48.55 30.49 9.22 48.5 25.81 1.87417013589194 2.1e-06 0.264130143453464 0.817588518874912 2.65927623498598 1.95e-06 1.7492216291181 0.0106660032360077 0 6.52 6.57 8.18 0
"1039" "Itgax" 54.92 87.24 94.88 142.27 56.32 51.56 16.23 49.65 35.65 56.03 596 -1.12628139860063 2.11e-06 -1.41140342507374 0.0100486057646642 -0.759106009174804 0.174705150762605 2.65193492383189 3.27e-20 0 0 0 0 7.24
"1040" "Snora44" 1817.12 1857.94 823.64 515.19 6320.49 3201.35 675.26 694.75 2555.77 1367.28 4580.78 1.11924676890563 2.19e-06 1.02782766531175 0.00727505587942998 0.125378371999363 0.630312177891358 1.86966293140241 1.9e-08 0 8.02 9.89 9.48 9.48
"1041" "Snhg1" 680.12 815.5 594.23 692.75 1263.59 1279.51 1511.35 1534.07 2206.31 1274.28 2020.81 1.00603273121015 2.21e-06 1.66520197710237 3.94e-07 0.873248783075042 0.0280997501447505 1.53850014793374 3.5e-06 6.52 8.06 9.54 9.01 8.87
"1042" "Aprt" 224.58 242.74 173.1 226.21 430.66 366.62 483.34 560.83 776.91 803.04 393.22 1.08735414082626 2.21e-06 1.84233130238966 1.06e-07 1.89005567217921 3.46e-08 0.859920523031727 0.0433163906576418 6.69 7.96 9.77 9.93 8.78
"1043" "Gm6654" 621.56 1137.69 301.98 863.35 926.69 1994.08 889.96 1803.93 1643.36 779.17 1815.33 0.940969208166321 2.27e-06 1.1684191029541 0.000502795007922613 0.091780582612445 0.779750925148055 1.3120023789561 4.41e-05 0 0 0 0 0
"1044" "C030002c11rik" 13.58 23.97 14.69 10.68 5.5 4.17 0.61 1.09 5.32 4.91 2.35 -2.46828641652344 2.32e-06 -1.5640205199145 0.270712581294589 -1.67972374110099 0.216003758533694 -2.74278600885069 0.0356170361942605 0 0 0 0 0
"1045" "Snrpa1" 202.94 246.52 238.42 282.24 338.58 374.35 671.54 611.27 462.04 413.26 322.04 1.04068866311623 2.32e-06 0.92985454089806 0.0275490138405534 0.768886516048146 0.0864106937515459 0.40907667998677 0.439229752445126 7.46 8.26 9.9 9.9 9.46
"1046" "Rgs3" 59.83 61.45 69.42 62 47.61 30 12.92 16.85 13.07 29.99 21.64 -1.2347003542716 2.36e-06 -2.2730946180367 0.000220847570839519 -1.0748722369634 0.087717618702219 -1.54565326000532 0.00926698321021651 0 0 5.77 0 6.3
"1047" "Pdha1" 313.26 298.92 277.93 355.08 419.14 523.1 791.58 664.38 801.79 485.24 479.78 0.945586082769709 2.38e-06 1.36493043346337 3.77e-05 0.640404490958517 0.124061967235869 0.624079028317522 0.125489333211754 4.96 6.97 8.91 9.4 8.17
"1048" "Klrk1" 49.99 65.54 50.6 75.82 38.95 28.63 5.36 21.18 16.26 33.38 24.04 -1.36213571353986 2.48e-06 -1.89530977668913 0.00457619594516275 -0.857653079401562 0.237166844717749 -1.33120013805298 0.0431744872559936 0 0 0 0 0
"1049" "Zdhhc18" 720.03 625.09 846.52 554.52 442.11 362.62 272.17 267.43 352.79 246.22 125.77 -1.03052835613438 2.48e-06 -0.96053411121515 0.0875722006955532 -1.47939582475442 0.00523883566052627 -2.44855594254892 3.48e-06 0 5.74 7.32 0 0
"1050" "Zbtb20" 145.03 148.35 148.9 99.37 93.74 74.35 42.58 26.97 12.67 31.13 65.96 -1.188583227358 2.5e-06 -3.41787249141635 4.88e-08 -2.12098343908798 0.000307248812024824 -1.03769761711969 0.092681240045986 0 0 0 0 6.45
"1051" "Btla" 3880.08 3114.27 3436.18 3494.73 2367.3 1594.99 735.01 1219.5 612.38 602.67 498.83 -1.23481522956086 2.5e-06 -2.50713328833657 0.000407573171925652 -2.53019220289776 0.000363218772171806 -2.8030122217943 6.68e-05 0 8.46 9.12 9.69 9.23
"1052" "Eef1b2" 2610.3 2433.27 2187.08 2912.4 4977.6 5339.69 5089.72 6030.9 4625.25 4140.78 5734.76 1.07967272926567 2.51e-06 0.867111718325373 0.0395636584883216 0.707482925519767 0.112123514849145 1.17731348193132 0.00198193623948462 6.77 8.91 10 10.8 9.38
"1053" "Wdr43" 508.05 535.57 447.43 513.87 852.88 849.9 1161.52 974.84 1311.64 1027.84 1041.31 0.937238499543441 2.51e-06 1.3878271325518 2.06e-05 1.03607103144065 0.00330444044996782 1.05485495404324 0.00210226304769767 8.37 9.49 11.1 11.4 10.6
"1054" "Prmt1" 304.84 322.07 329.69 402.79 472.85 499.2 1065.44 684.3 931.8 707.42 521.62 1.0015963446904 2.52e-06 1.45513282040456 2.58e-05 1.05767949708429 0.00635887826799577 0.618111676528041 0.170330720218809 7.42 9.13 10.5 10.3 10
"1055" "Pag1" 371.04 328.37 363.81 317.17 243.11 183.42 140.19 104.32 238.72 142.01 205.74 -1.0406052559059 2.56e-06 -0.531684581747251 0.464967864421705 -1.281011498058 0.0222950660443027 -0.746181712345698 0.228160006844839 6.18 6.33 8.19 7.13 7.26
"1056" "Smtn" 2.85 6.7 11.85 5.5 2.97 4.29 50.69 32.2 102.17 16.73 76.7 1.74472131887572 2.64e-06 3.92529356451754 7.83e-22 1.31483127259437 0.0789645019527178 3.51162040494631 1.1e-15 0 0 6.86 6.14 6.63
"1057" "Mapk11" 273.06 218.14 400.47 328.51 162.83 131.29 111.37 183.08 105.17 108.73 33.54 -1.0518080750729 2.65e-06 -1.53629885259829 0.00263665799952535 -1.48827203028498 0.00336048403160566 -3.18506748960501 6.94e-09 0 7.37 8.79 8.86 9.21
"1058" "Zfp428" 8.3 12.3 13.79 13.7 21.97 25.83 81.51 58.73 90.04 42.91 22.1 1.96723075431803 2.67e-06 2.90482913057845 4e-07 1.83557697487268 0.0107215323090703 0.87830944340309 0.33161659189812 6.53 7.98 9.42 9.65 9
"1059" "Rfwd3" 94.62 100.81 106.04 116.51 132.91 170.01 282.8 242.41 229.05 154.52 131.43 0.986423347851982 2.72e-06 1.13222865067207 0.00237159426787365 0.564359670498631 0.229737396641722 0.330860708310807 0.532953397091974 0 0 8.12 8.4 7.56
"1060" "Per2" 32.08 38.06 44.18 36.3 18.48 17.24 14.32 9.98 31.81 20.94 5.21 -1.32739812620707 2.78e-06 -0.243361073265844 0.900472117674235 -0.846580002874549 0.227894087921307 -2.85348616752685 1.71e-05 6.32 8.33 9.59 9.89 9.01
"1061" "Heatr3" 125.15 117.65 122.02 136.76 207.18 208.7 332.01 255.23 379.37 348.11 291.71 0.999942472833659 2.84e-06 1.59712577387294 1.73e-06 1.47306343504351 1.93e-05 1.21805502029856 0.000689210189190255 5.25 7.01 9.45 9.63 8.54
"1062" "Cuedc1" 11.74 15.73 11.75 13.62 26.66 29.28 50.03 41.42 25.33 51.56 2.2 1.47993627322535 2.89e-06 0.939216610465673 0.134672811699575 1.96462179711482 5.56e-05 -2.58605503772217 0.0325111513636772 0 6.25 7.23 8.69 0
"1063" "Pkp3" 70.2 85.43 99.11 85.96 41.81 31.04 28.74 35.64 14.93 27.12 48.69 -1.31190604230805 2.93e-06 -2.51221587684917 9.18e-05 -1.65107286384736 0.00798246223600375 -0.806804541714581 0.230407088548489 0 0 0 6.59 0
"1064" "Klri2" 16.05 20.45 23.94 37.38 15.42 10.34 0.78 6.06 1.54 3.12 2.99 -1.58525750021935 2.99e-06 -3.98912720864289 2.37e-05 -2.97051153047554 0.000501935355218032 -3.03191207513968 0.000336059808862626 0 0 0 0 0
"1065" "Rrp15" 231.04 216.62 170.66 240.42 337.6 396.89 534.83 484.72 402.58 659.4 369.49 1.03038834908928 3.09e-06 0.907054107684206 0.0287207003609237 1.61893249311763 2.94e-06 0.783313925431678 0.062270522926471 0 6.68 8.37 9.35 8.12
"1066" "Clcf1" 419.39 337.29 604.31 338.1 201.14 178.85 176.45 178.87 166.56 195.56 45.78 -1.20833776302475 3.09e-06 -1.35064839456287 0.0210668281070849 -1.11907905785415 0.0580323396609614 -3.2139010003066 1.81e-07 0 0 6.57 6.11 0
"1067" "Sema7a" 122.09 133.12 159.66 107.45 106.34 77.62 26.21 29.78 35.71 30.19 125.06 -1.12220013352107 3.12e-06 -1.87053390753856 0.00108329843345389 -2.112791284611 0.000227944866785686 -0.0623135242134918 1 0 5.97 7.55 7.72 7.72
"1068" "Ndufa9" 409.36 418.31 342.2 418.4 530.34 692.23 924.59 913.59 651.21 967.22 869.24 0.946429025190181 3.12e-06 0.713738572827582 0.0756111720197127 1.28445979566791 0.000173084536517465 1.1303702838337 0.00111343414346987 0 0 6.89 7.88 6.56
"1069" "Kifc5b" 11.04 15.91 12.23 6.41 19.14 23.7 57.26 35.58 80.78 60.47 53.01 1.57341876069843 3.14e-06 2.82528073683832 2.05e-10 2.40750216978679 5.53e-07 2.21754713140801 7.63e-06 5.81 7.51 8.9 9.16 7.82
"1070" "Larp1" 284.69 294.31 359.61 244.02 490.14 514 903.33 390.35 783.42 816.68 633.3 0.958267008925821 3.14e-06 1.40585908476484 2.46e-05 1.46584402272045 9.48e-06 1.09896220472015 0.00169427780977721 8.43 9.34 11.2 11.7 10.9
"1071" "Psd3" 80.17 74.41 74.36 61.26 46.45 42.27 27.86 20.29 3.73 27.59 9.2 -1.08424125684216 3.19e-06 -4.28172807869887 3.25e-12 -1.39483015760083 0.0116429897012163 -2.97926984800973 8.83e-08 0 5.79 0 6.28 0
"1072" "Ebna1bp2" 184.05 156.97 152.83 210.53 247.36 288.83 435.27 403.68 347.47 350.16 241.95 0.965152652425883 3.2e-06 0.98053447704035 0.0101393371629696 0.9916603428825 0.00919126160827735 0.458354993007614 0.327396084574566 6.4 8.01 9.62 9.9 8.76
"1073" "Slc25a15" 39.86 37.68 51.14 49.77 75.14 81.68 124.45 116.65 65.26 72.99 105.67 1.15695851128052 3.24e-06 0.548750991155479 0.353552845638076 0.7102508247232 0.18216192751206 1.24404594842334 0.00347599259153835 6.21 7.17 7.5 7.8 7.36
"1074" "Rnaseh2a" 67.37 71.29 99.97 88.04 130.14 145.68 225.97 220.38 162.81 146.2 170.03 1.14450452005581 3.26e-06 0.995355344704555 0.0335636788491902 0.840109341480801 0.0962888657056097 1.05795534733447 0.0176256053474348 5.48 7.92 9.13 9.53 8.37
"1075" "Dtymk" 290.25 353.67 332.71 347.32 468.44 559.64 790.72 843.52 839.09 1038.92 512.18 1.00783534905353 3.27e-06 1.34204882750779 0.000207821676081611 1.6502359279376 1.02e-06 0.629874185003073 0.158405982203309 7 8.19 10.2 10.5 9.26
"1076" "Prg2" 43.24 66.99 43.66 74.04 15.27 7.43 10.88 12.93 18.7 17.23 22.34 -2.29297797871889 3.28e-06 -1.6074806484685 0.169569011664528 -1.72559621701855 0.12547604061278 -1.35088973276019 0.244831776922887 0 0 0 0 0
"1077" "Mfge8" 34.09 37.64 35.25 40.86 37.41 52.22 147.93 119.16 514.4 323.97 314.29 1.27075544289785 3.29e-06 3.79885398079925 4.71e-36 3.13182356218436 4.75e-21 3.08805970769315 2.62e-20 0 6.35 7.48 7.24 6.32
"1078" "Nup107" 202.37 192.76 162.76 210.71 248.33 279.86 552.06 390.17 450.4 311.14 344.02 0.9359234132571 3.33e-06 1.22897385101743 0.000350563240054276 0.69533090253469 0.0848189701489166 0.840259463707105 0.0246479228290311 5.64 6.97 9 8.77 7.98
"1079" "Ctso" 582.47 595.64 616.04 588.64 457.97 321.21 169.18 234.43 98.47 99.41 186.73 -1.01045785832776 3.34e-06 -2.5968237411984 1.58e-06 -2.58311701450196 1.88e-06 -1.67362617520045 0.00127076657666989 0 0 6.62 7.21 6.29
"1080" "Gm13315" 20.73 25.32 15.31 19.24 17.07 46.09 92.03 66.34 89.47 113.28 50.8 1.45865034056005 3.34e-06 2.15062417762788 4.1e-06 2.49104142666767 1.13e-08 1.3340486582442 0.0145480983260719 0 0 0 0 0
"1081" "Plxdc1" 8.32 9.87 9.21 11.6 12.27 21.43 60.93 26.58 34.03 95.22 154.68 1.63596269905725 3.35e-06 1.80333302732804 0.00193734666620268 3.28779050491937 7.43e-15 3.98774064044583 1.44e-26 0 7.64 8.83 9.57 8.46
"1082" "Lck" 188.62 159 172.62 212.73 95.58 74.08 56.34 93.6 123.85 228.73 81.93 -1.1974867427031 3.35e-06 -0.565160282384711 0.425993551072759 0.31989144964184 0.558272430562707 -1.16129043103199 0.0421394865131744 4.91 5.95 8.87 7.71 6.83
"1083" "Gimap5" 397.89 350.39 364.17 364.97 231.46 200.78 121.59 141.19 149.55 129.79 33.12 -1.08795361406491 3.43e-06 -1.3043801972505 0.0184206737602922 -1.50882887619025 0.00554526110626271 -3.47923352975789 1.68e-09 0 7.35 8.56 7.06 0
"1084" "Acacb" 1.14 1.27 0.42 2.3 4.09 3.79 8.95 4.95 12.22 47.4 5.1 2.08597322310985 3.43e-06 3.25221355421168 1.74e-08 5.20785632817857 2.63e-37 1.9915384212518 0.00593159736219479 0 0 0 7.07 6.51
"1085" "Rapgef4" 258.85 253.54 286.65 247.91 217.33 165.62 45.09 83.37 23.45 67.8 4.71 -1.03364026789895 3.44e-06 -3.48046081104633 1.7e-09 -1.94876346042537 0.000263821271725848 -5.79624976883629 3.54e-17 0 0 6.35 7.8 0
"1086" "Coro2a" 170.09 187.06 213.52 209.1 109.59 93.61 70.2 100.98 46.92 51.6 59.76 -1.05854528534563 3.5e-06 -2.05477373268662 0.000100032394996035 -1.91760568040451 0.000256720326727446 -1.70579659792589 0.000866631350598284 0 0 7.57 8.03 8.88
"1087" "Rps2" 373.64 471.06 526.97 494.23 820.76 760.25 1002.24 1122.87 996.94 709.47 716.88 0.990037925694169 3.55e-06 1.0957069156834 0.0040397086552649 0.604941916933124 0.196716896347542 0.619931879323989 0.170330720218809 6.42 8.14 9.82 9.97 9.12
"1088" "Nup62" 252.84 227.45 245.9 248.38 295.24 331.64 687.97 555.77 520.94 457.6 327.89 0.940678799409976 3.56e-06 1.09635140462286 0.00242443865319534 0.909321239105234 0.0180499666388224 0.42844609003005 0.358934848247752 6.15 8.13 9.77 9.86 9.24
"1089" "Luzp1" 17.97 18.88 15.53 20.01 24.52 36.52 61.04 38.33 20.02 30.99 57.2 1.14790176118287 3.61e-06 0.145651557899086 0.835383574445584 0.776012338649308 0.119974181011455 1.66022473072884 1.28e-05 0 5.35 6.33 6.72 6.7
"1090" "Cd3eap" 40.88 47.33 36.55 54.86 74.48 79.92 132.25 130.59 126.16 104.86 79.19 1.2159294753015 3.63e-06 1.49030656764322 0.000577517489450154 1.22351645336907 0.00878236823611114 0.818442167854055 0.114775371692536 6.02 8.16 9.53 9.54 8.24
"1091" "C230035I16Rik" 0 3.87 4.34 5.75 20.74 37 36.94 32.94 39.08 9 30.35 3.19248359247218 3.72e-06 3.48513152575873 0.000430145757663093 1.36669796500738 0.290481839401326 3.12039757493339 0.002625912642636 0 9.06 9.44 8.97 9
"1092" "Fam60a" 75.56 80.59 67.99 114.58 125.44 195.48 185.74 210.56 192.43 160.03 179.21 1.08232254450458 3.74e-06 1.18424055956297 0.00376430749691454 0.91824921061796 0.0394407445213226 1.08155796822692 0.00840785728664707 7.01 9.81 11 11.1 10.6
"1093" "Rnf122" 101.83 85.87 99.37 92.22 56.95 40.95 26.34 38 11.56 11.28 36.95 -1.22517177795208 3.75e-06 -3.03608803245474 1.37e-06 -3.07146236255662 9.94e-07 -1.3596550659219 0.0216450101033151 0 7.01 5.96 0 7.76
"1094" "Atpif1" 354.1 418.81 297.98 263.13 498.59 585.19 882.28 796.77 713.6 490.53 968.29 1.05036649828119 3.77e-06 1.09740722439969 0.00631672930980075 0.556632981116479 0.225845043530766 1.53773080426901 1.83e-05 0 6.87 8.48 8.11 8.08
"1095" "S1pr3" 90.25 79.64 114.62 88.96 83.78 52.06 14.74 24.47 11.29 6.69 10.96 -1.09322529747432 3.8e-06 -3.04787496801718 3.71e-07 -3.80284233814872 1.62e-09 -3.09067265582966 1.8e-07 0 0 0 0 6.99
"1096" "Zbtb10" 71.04 57.89 54.39 45.58 28.72 24.24 27.95 16.73 14.25 8.5 27.97 -1.22917326266189 3.84e-06 -2.00568363850358 0.000718704600363662 -2.75111081141798 5.37e-06 -1.03276530396686 0.101677406251481 0 9.09 8.96 6.3 8.63
"1097" "Ptprf" 1.11 2.5 5.13 4.87 0.6 0.41 0.3 0.8 5.2 7.41 268.68 -2.68935216279681 3.86e-06 0.61191646152446 0.536032250468227 1.12287838080184 0.166507272646146 6.30314996206976 1.96e-106 0 0 0 0 6.17
"1098" "Ccr6" 754.9 680.47 914.12 629.63 727.32 466.52 128.41 195.47 97.45 64.49 43.29 -0.972980580570105 3.87e-06 -2.93408024131241 6.9e-08 -3.52966695725027 3.95e-10 -4.10470862624531 1.92e-12 0 5.53 8.54 8.12 8.06
"1099" "Taf1d" 647.45 506.87 491.34 542.79 971.13 1071.84 1047.47 1065.81 1801.54 1654.95 1648.76 0.925373012719604 3.89e-06 1.71932126182296 1.62e-08 1.5968782076396 2.97e-07 1.59147198690397 2.23e-07 0 8.87 10.2 10.1 9.44
"1100" "Gm10451" 44.64 56.18 50.96 50.62 137.16 170.8 131.01 125.16 479.33 640.67 43.24 1.47881837036452 3.89e-06 3.24380994722651 3.63e-18 3.66237214644381 5.57e-26 -0.226770861847022 1 0 0 9.06 9.34 0
"1101" "Rsl24d1" 219.05 266.03 206.95 333.72 395.18 501.05 510.1 640.44 423.04 429.18 498.22 0.996669838457028 3.89e-06 0.722186832840432 0.100826981552159 0.742975598241512 0.0882781413919338 0.958175687598776 0.0142917304309259 0 8.32 9.32 9.73 9.21
"1102" "Ap1s1" 87.03 92.6 85.94 102.04 137.44 164.12 298.04 232.34 229.44 254.89 162.2 1.17830347168519 3.96e-06 1.31994091673067 0.00253142842142468 1.4716987613565 0.000483891167371023 0.819597807133405 0.101804609566643 0 6.63 7.89 8.36 7.38
"1103" "Pgk1" 91.89 123.35 72.83 150.61 152.26 225.83 259.83 289.61 251.06 368.87 269 1.08022501148328 3.96e-06 1.19486325681782 0.00340207942125415 1.74994352670098 9.86e-07 1.29443723929586 0.00089774560860632 5.99 6.54 8.55 9.18 8.09
"1104" "Dennd1c" 554.87 444.4 751.77 465.54 372.38 305.79 175.98 263.32 151.62 162.6 107.69 -0.988099331847562 3.97e-06 -1.86980345743895 0.000265037247864789 -1.76893627014249 0.000543320521626155 -2.36337923886389 4.23e-06 0 0 7.15 0 0
"1105" "Enpp1" 145.38 134.11 165.23 187.79 107.17 67.58 52.31 68.91 123.04 32.05 31.58 -1.09563733968241 4.05e-06 -0.361960880622022 0.629308990491546 -2.30269202707775 3.21e-05 -2.32400521272361 2.04e-05 0 7.31 8.57 7.4 7.15
"1106" "Mthfd1l" 251.41 232.94 233.38 233.27 345.07 362.3 661.03 425.65 816.93 463.3 447.07 0.91570285239027 4.06e-06 1.78076712286721 3.77e-09 0.962501341285346 0.00790728690735577 0.911055398032595 0.0110310115514763 7.34 8.69 10.3 10 9.84
"1107" "Paqr5" 6.21 11.94 8.92 11.65 1.83 1.19 1.74 1.74 2.76 4.44 69.54 -2.57456732935878 4.07e-06 -1.81033878049643 0.184252643164616 -1.12444737092449 0.43730461902088 2.84476411445303 5.26e-11 0 0 0 6.24 8.65
"1108" "Zc3h12a" 218.34 222.7 243.03 193.72 142.08 123.18 70.41 76.79 57.17 55.84 70.5 -1.08962161987957 4.11e-06 -1.94054563936943 0.00041300821646938 -1.97450498809353 0.000317874508882659 -1.63818067212967 0.00233462487761096 4.99 8.48 9.67 8.06 10.1
"1109" "Adam28" 7.38 6.14 13.2 5.99 3.23 2 0 0 0 0 0.38 -2.64484890783584 4.14e-06 NA 0.00445637006638979 NA 0.00321148075242625 -4.42758853063919 0.0148644210009037 0 0 0 0 0
"1110" "Klrd1" 84.12 103.14 77.05 128.4 49.65 24.57 7.41 25.47 30.23 80.46 60.3 -1.87450585529002 4.14e-06 -1.69941145129993 0.0763547276406718 -0.28712069230201 0.958225222608256 -0.703234428140193 0.550726431770264 0 0 0 0 5.69
"1111" "Naf1" 24.64 39.95 24.77 24.61 61.75 63.16 88.67 55.28 118.96 67.62 70.84 1.23820101448748 4.33e-06 2.06182243466624 1.1e-07 1.2468678035072 0.00701633682267026 1.31398199936574 0.00314456568486548 6.25 7.36 8.81 8.54 8.42
"1112" "H2afy" 828.71 977.67 938.21 927.08 1140.98 1256.49 2375.02 2184.4 1639.62 806.86 1841.18 0.922006110518334 4.34e-06 0.836925094152864 0.0298578422014878 -0.186046123723393 0.9299703234736 1.00419427738254 0.00489755704643722 5.06 6.78 8.87 7.22 8.71
"1113" "Apex1" 115.19 109.86 108.43 94.25 173.56 196.13 298.74 276.1 315.43 266.24 301.19 1.1428962218938 4.37e-06 1.56061948079574 9.81e-05 1.31602694051141 0.00188178966096575 1.49397347289274 0.000181106100281666 7.36 7.81 9.41 10.1 8.71
"1114" "Prps2" 363.92 307.63 307.07 347.21 515.34 551.01 709.55 720.02 237.3 502.63 245.1 0.912675890543106 4.39e-06 -0.482111797045842 0.501594517384697 0.600672884981035 0.143019147042728 -0.435453413372951 0.547271732207642 0 7.8 8.81 9.32 8.42
"1115" "Gm14446" 241.49 299.12 153.12 161.38 106.7 70.04 45.66 128.04 23.11 132.57 84.1 -1.28694256119371 4.39e-06 -3.20952085302986 2.07e-07 -0.689355681019331 0.404531942683258 -1.34593231235499 0.02834003910098 0 0 6.42 7.14 6.21
"1116" "2010107E04Rik" 1495.9 1675.42 662.49 1121.99 1925.85 2691.97 1943.91 2657.56 1830.09 3591.45 2228.19 0.895537683305297 4.43e-06 0.562796632814889 0.125577800561373 1.53544846436325 6.54e-07 0.846754291814017 0.012715134556317 0 6.21 8.03 8.57 7.39
"1117" "Cdk14" 32.22 38.91 27.62 31.95 16.01 19.01 4.64 8.55 5.89 11.54 20.49 -1.43885480628655 4.43e-06 -2.47184769685233 0.00080931266621757 -1.50154401203731 0.0407545451806549 -0.673267251671549 0.461487443745111 0 0 0 0 0
"1118" "Hdac9" 398.29 333.39 309.72 288.47 202.1 205.97 109.63 125.44 157.66 41.14 50.48 -1.04808049793877 4.44e-06 -1.07639663876758 0.0644049379611166 -3.01459961944142 6.71e-08 -2.71942950298381 5.45e-07 0 7.13 7.07 8.32 0
"1119" "Abcb6" 35.01 38.28 38.33 62.26 68.56 72.17 134.17 119.63 164.44 157.94 127.67 1.1820430059883 4.53e-06 1.91946927628585 5.21e-07 1.86128459474728 1.66e-06 1.55432755848653 0.000150413059278077 0 5.92 7.29 7.39 6.69
"1120" "Ndufa10" 390.67 431.72 418.46 484.64 626.03 733.76 909.84 1078.54 793.86 950.11 643.66 0.956366668429861 4.57e-06 0.879950397850415 0.0271623033642209 1.13916034506201 0.00188237618319365 0.577364608301383 0.190595050798033 0 5.84 8.63 9.14 7.53
"1121" "Il18r1" 20.83 15.24 21.5 40.63 13.17 10.78 1.97 8.16 20.22 38.58 24.05 -1.52679768897622 4.58e-06 -0.279940027299041 0.850572712980048 0.652130118847048 0.319082603592427 -0.0296861305446511 1 0 0 0 0 0
"1122" "Pira6" 118.7 198.96 145.35 277.62 81.18 109.04 37.52 105.01 29.78 40.28 145.12 -1.15431432244157 4.6e-06 -2.63633732954609 9.62e-06 -2.2006174001214 0.000146548662980498 -0.351506627599666 0.63765761707259 0 0 0 5.75 7.44
"1123" "Tanc1" 7.98 10.32 7.93 10.13 18.69 22.4 28.18 20.82 46.56 13.26 28.39 1.3090147760842 4.81e-06 2.35673885871418 1.6e-09 0.544728575918481 0.394873980101603 1.64303064953028 0.000231463807011918 0 5.97 7.45 0 6.86
"1124" "Rbbp7" 361.54 358 292.58 379.23 485.21 536.59 876.36 712.56 597.04 724.15 448.61 0.907962355152271 4.83e-06 0.779414114751499 0.0417551811885656 1.05787509077078 0.00266882395637624 0.367048303523947 0.404708928444141 0 5.67 8.32 8.83 6.74
"1125" "Pik3ap1" 1232 1125.88 1226.67 919.3 628.85 572.54 542.95 438.03 276.19 292.28 405.43 -1.04526306192184 4.9e-06 -2.02742578943785 0.000255647699448479 -1.94573576192363 0.000455369488757915 -1.47363402866797 0.00724737567552805 6.99 9.22 10.2 9.85 9.64
"1126" "Lats2" 271.33 249.65 295.82 249.65 170.1 126.72 110.49 119.79 121.25 66.34 77.77 -1.01666773001456 4.91e-06 -1.13675967478224 0.035065777079169 -2.00679350484343 0.000126844220651136 -1.77745877818476 0.000516089244310045 6.06 7.28 8.92 8.84 8.6
"1127" "Slc14a1" 124.86 133.64 130.73 132.85 74.64 73.19 47.31 46.38 111.54 20.96 12.1 -1.11212823057824 4.91e-06 -0.226709716451226 0.902744101638018 -2.63856027055441 4.32e-06 -3.43119193992991 8.74e-09 0 6.75 7.94 7.6 7.83
"1128" "Ddx27" 319.7 295.83 308.1 339.59 433.77 496.36 833.82 632.17 639.62 634.75 481.71 0.923594243454657 4.92e-06 1.01818103760081 0.00516127708307306 1.00715447694537 0.00597426986742564 0.609130860760114 0.139593055788666 0 7.95 9.36 9.7 8.6
"1129" "Naa50" 251.15 185.25 212.52 200.36 336.67 339.28 690.68 233.78 415.59 286.2 248.73 0.914129367424966 4.92e-06 0.968920664456079 0.006897836152955 0.430783396243837 0.328779317187443 0.228340249590977 0.626586210243381 6.02 8.12 9.28 9.08 8.67
"1130" "Ak7" 1.17 1.54 1.73 1.15 13.59 6.37 8.11 6.57 0.78 2.51 4.16 2.63151874188354 4.94e-06 -0.841302253980942 1 0.844839081107582 0.428781999904839 1.5737352452979 0.119244649028566 0 0 6.27 0 0
"1131" "Gbp10" 11.98 46.72 16.19 14.32 6.22 7.65 1.72 7.3 4.78 15.11 49.75 -1.96248797529888 5.01e-06 -2.22212291487382 0.0235480725580365 -0.561701777689741 0.772648865823653 1.1574910874638 0.00982212754957273 0 0 0 0 7.13
"1132" "Stambpl1" 211.91 214.36 182.7 190.46 270.34 316.3 455.49 495.54 433.41 105.03 260.9 0.943702300608739 5.05e-06 1.11676072747608 0.00209519923961104 -0.928170245812542 0.151368372866678 0.384525230742612 0.392446568074087 8.18 9.67 10.4 10.1 9.78
"1133" "2310061C15Rik" 43.62 29.03 29.12 37.55 64.75 51.88 111.31 133.12 77.03 97.98 91.83 1.3738362222601 5.17e-06 1.14508995239045 0.0432973422649305 1.49215681869613 0.00433718925058475 1.39863507266143 0.00695009571354234 0 0 0 0 0
"1134" "Naa10" 218.49 237.52 219.69 223.28 340.19 384.17 567.59 540.11 581.18 640.67 585.1 1.0271058275549 5.17e-06 1.37069603689511 0.00023024917092531 1.51129241664485 3.02e-05 1.380394198326 0.000156019531418896 6.1 8.51 9.64 10.4 9.69
"1135" "Cd320" 16.95 10.81 14.54 17.66 32.28 35.23 53.65 55.2 84.6 77.95 66.22 1.55645109366789 5.2e-06 2.49665728005945 1.23e-07 2.37854863963729 1.05e-06 2.14326662744914 2.54e-05 5.58 6.87 8.09 7.89 7.69
"1136" "Cdkn2a" 2.6 2.57 1.92 0 10.82 8.93 37.62 10.94 5.19 502.24 12.6 3.26823925961826 5.28e-06 1.54994891111837 0.237995797005317 8.1464474963426 3.47e-63 2.82956620114776 0.0118826280411868 5.07 7.45 9 10.3 8.19
"1137" "Klf9" 25.17 31.85 18.59 13.58 55.19 50.56 56.81 48.16 77.6 39.15 5.02 1.24037338162771 5.28e-06 1.79917468844569 1.53e-05 0.812130343549603 0.111393553797733 -2.15112269467803 0.0278862083488696 5.16 8.53 10 9.43 7.39
"1138" "Abce1" 512.59 473.93 419.11 500.05 793.5 790.48 1036.6 967.66 858.85 816.94 952.3 0.912970504784575 5.29e-06 0.850172205099228 0.0225844652974912 0.77799614533093 0.0411610686360608 0.999182154232294 0.00419627303206128 8.15 8.67 10 10.5 10.1
"1139" "Mrto4" 110.41 131 86.35 136.3 182.82 234.29 298.15 332.14 368.21 354.78 271.79 1.17442925610193 5.33e-06 1.66621745984524 3.86e-05 1.61261333425101 8.64e-05 1.22818102715576 0.00517922564338969 5.81 8.13 9.94 9.8 9.37
"1140" "Lyz2" 1060.55 1369.54 399.29 736.31 755.83 455.47 94.15 296.71 4148.82 1729.96 3052.26 -1.15416305100453 5.48e-06 2.21851978509678 1.38e-16 0.956557399417088 0.00204284749792687 1.77569657923643 1.64e-10 0 0 0 0 0
"1141" "Kdm5b" 197.49 156.98 213.3 183.33 125.8 111.83 61.86 78.81 26.6 66.3 28.6 -0.98947422176475 5.57e-06 -2.81950684731294 1.75e-07 -1.50192422270154 0.00375371517311399 -2.71491794603574 2.91e-07 0 5.42 6.28 6.63 0
"1142" "Zfp36" 732.31 858.07 710.29 606.68 447.46 393.27 250.07 312.02 157.12 99.45 61 -1.05137485576341 5.71e-06 -2.20976602023384 4.36e-05 -2.86958957882742 2.21e-07 -3.57475170721092 3.56e-10 5.37 9.65 10.9 10.9 10.6
"1143" "Gng7" 0.35 0.7 0.26 0.78 7.74 4.54 4.21 3.96 2.82 2.59 3.42 3.29052599574823 5.76e-06 2.43219222031791 0.0488476011357133 2.30944915560567 0.0621553048676436 2.71049338280502 0.018596504908103 0 8.91 9.85 9.73 9.8
"1144" "Igf2bp3" 76.7 76.11 66.3 66.07 111.66 149.89 182.1 121.55 95.14 148.48 35.8 0.986888658197809 5.77e-06 0.416251122938962 0.382103795945886 1.05839580810408 0.00546192552660678 -0.993841314871874 0.129207825757625 4.84 8.42 8.05 9.33 5.41
"1145" "Tjp2" 17.51 19.12 16.02 16.3 26.11 29.86 63.61 42.94 59.22 16.34 25.06 1.23699481282975 5.78e-06 1.78053393877621 2.95e-05 -0.0771425682556593 1 0.539835862920518 0.355935869591327 0 5.41 7.25 6.45 5.71
"1146" "Stac" 0.96 1.42 0 1.41 1.09 4.54 9.67 14.01 14.38 24.29 0 2.95112321451845 5.83e-06 3.92379392226821 3.68e-06 4.68009273646477 2.57e-10 NA 0.984296860952985 0 0 0 0 0
"1147" "Cox7b" 371.68 458.19 181.84 303.74 563.43 640.57 544.9 746.41 717.91 1008.81 874.43 0.923662644131417 5.83e-06 1.12631848562828 0.00119785853303057 1.61709806882206 3.62e-07 1.41085839005811 1.35e-05 0 7.24 8.72 9.51 8.4
"1148" "Tmed8" 434.46 366.52 387.29 354.37 287.89 237.6 129.52 115.11 96.57 112.65 110.68 -1.0022462559669 5.86e-06 -1.997682537198 0.000279030395929172 -1.77548220627404 0.00126386850208288 -1.80093497078688 0.000830959104532158 0 5.85 7.13 8.22 6.46
"1149" "Tmem98" 1.73 1.71 1.92 0.64 2.62 3.72 26.18 17.99 12.98 7.18 2.52 3.07353463593532 6.07e-06 3.11325597750326 0.0026442161903166 2.25902134332717 0.0548021512124645 0.748461233004036 0.582866680656339 0 0 0 0 0
"1150" "Sspo" 1.55 1.84 4.12 2.22 0.59 0.67 0.24 0.57 0.46 1.57 3.91 -2.23280903728179 6.09e-06 -2.4027340387241 0.0546536327158423 -0.631675245889485 0.664212484018241 0.684728802526241 0.390318863770652 0 0 0 0 0
"1151" "Il4i1" 51.34 64.18 33.56 36.81 22.33 24.84 5.57 4.96 4.12 7.6 6.29 -1.68780593821347 6.37e-06 -3.49566101456309 0.000265037247864789 -2.61230593341537 0.00361237094951947 -2.88524533486702 0.00128479618318931 5.94 6.73 9.07 9.4 9.81
"1152" "Fanca" 70.23 80.75 86.65 75.93 153.19 148.97 171.31 150.81 200.21 233.88 187.6 0.993451716556868 6.38e-06 1.35277250457183 0.000161406759297572 1.57702696593787 3.79e-06 1.25891829736156 0.000473922510496244 0 6.88 8.32 7.54 7.51
"1153" "Cmah" 490.42 358.43 464.44 428.95 341.5 250.99 119.18 155.57 387.25 130.54 320.85 -1.00644016895706 6.4e-06 -0.169606230073549 0.990274983545769 -1.73837952467381 0.00221024149117915 -0.44097248586428 0.570999778359315 0 7.06 9.12 7.31 7.44
"1154" "Zfp831" 381.67 316.84 421.8 303.13 246.49 222.54 118 127.67 52.39 65.37 14.44 -0.993971989348753 6.65e-06 -2.76394641050246 1.21e-06 -2.44460917533446 1.4e-05 -4.62316713028435 2.49e-13 0 0 0 0 0
"1155" "Ccr9" 27.5 32.91 39.21 45.21 17.9 18.66 9.86 10.8 13.18 46.04 749.49 -1.33976906959443 6.8e-06 -1.45793819690956 0.0359879940097331 0.346599266214617 0.614876798846517 4.37154875691017 1.69e-65 0 5.83 0 0 7.38
"1156" "Ecm2" 4.7 7.64 6.45 3.7 15.51 20.77 32.53 6.59 51.3 31.82 41.98 1.74528086237821 6.82e-06 3.1896751647166 1.4e-11 2.50065017455323 3.58e-06 2.90041850551434 4.08e-09 0 0 0 0 0
"1157" "Ssh1" 179.26 167.46 238.95 156.67 101.09 101.34 90.23 64.02 66.1 77.35 29.13 -1.05744978632338 6.82e-06 -1.48935793178724 0.0062248019590056 -1.26260691184589 0.0212466454824264 -2.67150250204194 1.3e-06 0 0 7.25 7.62 0
"1158" "Calcrl" 116.79 105.65 125.07 152.88 68.7 61.33 50.36 60.77 61.6 35.41 20.26 -1.05306232389118 6.9e-06 -1.02205070234669 0.0649319825202989 -1.82082420953804 0.000662402261734643 -2.62634687912781 1.51e-06 0 5.82 7.22 0 0
"1159" "Sh2b3" 536.82 728.57 784.07 562.85 386.33 331.92 269.04 323.41 314.8 308.84 194.72 -0.994988598486318 6.93e-06 -1.05281866414421 0.0533423209420189 -1.08039458689007 0.044623716618467 -1.74585313182533 0.000635168350274641 7.72 8.88 10.4 11 9.83
"1160" "Ak2" 393.61 368.7 351.42 369.56 472.99 538.11 948.35 813.18 705.91 653.67 304.49 0.902454416862663 7.33e-06 0.928755475325059 0.0123452545518059 0.817833703130606 0.0334667952959308 -0.284333935276226 0.813714897088356 0 7.41 8.86 9.03 8.15
"1161" "Ank" 133.03 114.11 111.28 87.22 72.43 64.11 32.81 29.26 54.15 54.02 83.35 -1.16594046841185 7.4e-06 -1.0408454897579 0.110481021816632 -1.04431318774462 0.106841812862306 -0.418624628379813 0.679095730477608 0 5.36 5.94 6.25 7.03
"1162" "Rars" 324.81 307.71 313.62 346.5 479.56 531.68 761.09 669.43 615.6 760.07 512.89 0.917600864360957 7.41e-06 0.929744595992745 0.0138637067068912 1.23388365657015 0.00036865298224264 0.666400807174214 0.101203708250604 5.39 5.29 7.84 8.48 7.19
"1163" "Scn4a" 105.64 81.28 102.1 80.47 58.05 50.01 37.19 30.7 26.32 25.42 3.02 -1.07036980523477 7.5e-06 -1.81130392513655 0.00101131592763624 -1.86149938386684 0.000726275393149906 -4.93484295954672 6.95e-14 0 0 0 0 0
"1164" "L1cam" 20.33 12.2 22.95 18.1 9.68 5.3 3.88 5.12 4.79 19.96 26.78 -1.61748201755875 7.51e-06 -1.94121611523679 0.0192092871948581 0.117798044364286 0.920233373095738 0.541842284351336 0.376340386187333 0 0 0 6.19 6.35
"1165" "Ppp1r9b" 268.66 300.94 322.09 304.21 187.04 147.85 104.74 160.82 62.1 132.13 244.04 -0.993980736257911 7.61e-06 -2.26735967914612 1.57e-05 -1.17806678629075 0.025517542765682 -0.292907216916337 0.725709518769434 5.48 7.44 7.62 7.79 8.61
"1166" "Thg1l" 146.66 171.72 107.38 159.54 232.66 270.72 371.34 375.12 350.55 352.56 377.6 1.09449523432183 7.61e-06 1.2604439561738 0.00244135865194094 1.26869252305989 0.00225420955220528 1.36768248603166 0.000604024807105735 7.82 9.33 10.1 10.5 9.57
"1167" "Rps18" 2701.81 3560.37 1913.98 3659.03 4786.75 6672.85 3801.23 6772.52 7264.39 5179.31 6864.87 0.896605995284975 7.67e-06 1.29583069610902 8.33e-05 0.807748949536641 0.0300011613249319 1.21422143841305 0.000218973287703354 5.66 8.77 11 9.96 10.6
"1168" "AI427809" 2.84 2.81 5.88 5.43 29.28 16.13 15.03 17.55 2.27 2.09 11.58 2.20115298131361 7.71e-06 -0.901371967272284 0.951814939410748 -1.02056132248232 0.878721142512335 1.44949908342604 0.145115306688933 0 6.18 6.06 6.49 8.89
"1169" "Zfp318" 820 556.56 832.25 658.64 532.46 409.95 222.91 243.21 274.22 127.03 58.97 -1.02557803833448 7.71e-06 -1.3863626282591 0.021722328226155 -2.49652717407967 3.31e-05 -3.60364332566386 9.15e-09 7.09 7.21 8.4 8.44 7.12
"1170" "Btf3" 711.49 700.2 562.38 796.97 968.6 1255.54 1288.64 1659.27 1144.91 592.15 1195.96 0.900308685956457 7.74e-06 0.724806657962902 0.0668532591630607 -0.226392953898436 0.888856893027217 0.78774160176674 0.0358005281565422 5.9 7.49 9.01 8.22 8.32
"1171" "Oasl2" 57.78 143.2 55.2 36.46 44.31 25.48 9.45 28.73 10.77 61.64 127.99 -1.43849647210283 7.8e-06 -2.76403682520451 9.59e-05 -0.247188213233931 1 0.806904115072954 0.026808782115286 0 0 0 0 0
"1172" "Gtf3c4" 117.98 115.82 109.69 141.31 191.13 207.77 288.47 226.05 228.76 225.89 198.37 0.913888680115965 7.88e-06 0.916445111842974 0.0153097027224916 0.898230706184233 0.0184753285127002 0.71080416096736 0.0733958853473962 6.61 8.21 10 10.3 9.6
"1173" "Itih5" 49.98 45.2 40.85 48.75 18.1 19.76 25.01 17.52 149.05 39.66 18.6 -1.20072065680249 7.96e-06 1.68998776285157 2.14e-07 -0.220052029798118 0.93666523463868 -1.31243408603157 0.0261959126730054 0 0 7.9 7.56 0
"1174" "Zfpm1" 70.64 96.3 97.24 62.83 73.97 97.14 296.6 173.65 271.35 233.27 4.15 0.971799625183678 8.1e-06 1.73082015451714 2.59e-07 1.51266602536553 1.81e-05 -4.30007960747833 1.68e-09 6.58 8.31 10.6 10.9 0
"1175" "Cd300lf" 71.77 89.34 111.71 71.48 51.89 36.33 22.57 23 24.31 21.81 85.05 -1.36369589369945 8.17e-06 -1.82404438242855 0.00952569983055066 -1.98060450581653 0.00465942278896097 -0.0172830399065306 1 0 0 6.29 0 8.12
"1176" "Gm5124" 16.54 15.14 20.36 18.43 27.81 45.77 80.9 49.12 61.75 46.19 40.95 1.5306564422297 8.18e-06 1.80942992262605 0.000943143244522027 1.39057133211568 0.0224776818929927 1.21685423779502 0.0503000573084276 0 0 0 0 0
"1177" "Sestd1" 1.87 1.48 2.21 0.82 3.96 5.46 15.51 9.43 11.56 4.81 37.64 2.42910170737359 8.23e-06 2.85751306873581 0.000311613884542138 1.59248047000517 0.0996589989318147 4.56063829896367 2.52e-15 0 0 0 0 6.9
"1178" "Pfkm" 19.29 19.49 25.41 17.85 35.23 43.59 74.65 53.63 43.12 56.32 59.73 1.33592815662802 8.26e-06 1.07202968627265 0.0581311914877047 1.45731984215745 0.00405289247916422 1.54212822996181 0.0014636148922589 0 7.69 8.38 8.56 7.61
"1179" "Uqcr10" 651.92 668.97 388.48 542.71 949.33 992.86 1167.92 1284.11 1394.4 1687.78 1536.38 0.964349024429146 8.74e-06 1.3083863978005 0.000277324275885094 1.5838687860407 3.14e-06 1.44827701188264 2.51e-05 0 0 8.45 8.52 7.89
"1180" "Tbc1d9" 70.44 89.46 76.59 69.42 62.68 45.6 15.46 20.04 19.17 16.53 28.01 -1.08924425960818 8.78e-06 -1.99618502631583 0.000548156417742579 -2.20994863869167 0.00013620772388376 -1.44909337990948 0.0109621164130066 0 5.38 6.94 5.97 6.43
"1181" "Phf15" 218.62 242.79 241.94 187.89 163.19 116.51 86.8 80.18 110.89 97.61 107.24 -0.996572324413969 9.08e-06 -1.00668471423414 0.0758712281439093 -1.19071312170051 0.0300271365447478 -1.05497085971096 0.0537349537535683 6.12 7.29 9.87 9.98 8.65
"1182" "Rel" 862.04 731.24 686.48 555.04 512.23 470.6 291.34 142.08 155.38 164.23 135.41 -1.00117099810358 9.08e-06 -2.18937423227778 6.45e-05 -2.10945735981435 0.000119277764209932 -2.38784076346443 1.01e-05 6.42 8.42 9.13 9.67 8.65
"1183" "Coq7" 63.8 79.53 50.2 46.81 73.46 115.55 208.45 195.98 113.51 76.53 57.77 1.30402539548375 9.17e-06 0.917742624142393 0.103416931923895 0.349020527304366 0.557661866513547 -0.0566843776791367 0.998612626160347 0 6.94 7.77 8.19 7.19
"1184" "Ccdc116" 4.97 5.22 10.56 5.25 23.99 16.55 22.08 20.39 64.52 20.86 54.79 1.67477352141529 9.33e-06 3.31123481523983 6.24e-14 1.68222753460395 0.0078489383929001 3.07540098039016 1.91e-11 0 0 0 0 0
"1185" "Lass4" 140.62 119.83 167.12 121.8 73.52 64.21 68.35 53 139.71 69.05 5.74 -1.08438048067179 9.4e-06 0.0246571581260372 1 -0.992064810270034 0.0866793068655578 -4.58058358273976 2.33e-12 0 0 0 0 0
"1186" "Ptk2b" 1312.78 1080.1 1424.91 1193.84 769.29 625 509.02 562.86 291.72 244.82 200.45 -1.02300765472923 9.42e-06 -2.10262370259145 0.000306113032840196 -2.355486581334 5.96e-05 -2.6439655843032 5.86e-06 0 7.21 8.13 8.35 7.82
"1187" "Eomes" 9.75 13.5 7.93 21 5.17 3.63 1.64 2.37 5.19 4.78 1.26 -2.02622646847581 9.53e-06 -1.32969050045957 0.265854010232211 -1.4484144208367 0.199007432371899 -3.37200130531754 0.00390161585385167 0 0 0 5.85 0
"1188" "Prmt2" 39.44 44.24 55.66 52.7 19.15 18.71 10.74 15.52 5.88 10.29 2.85 -1.58256051050405 9.57e-06 -3.02944687582223 0.000472466251881761 -2.22209195376463 0.00686612357746725 -4.07430111160649 1.39e-05 0 6.08 6.83 7.1 6.13
"1189" "Psmd3" 283.57 313.76 324.58 315.43 387.43 440.25 882.44 609.86 669.98 734.74 499.8 0.906870385408252 9.81e-06 1.11494795165188 0.00190538645401537 1.24806374080826 0.000329246991902128 0.692180823672482 0.0883487814185602 5.69 6.56 8.23 9.07 8.37
"1190" "Tbc1d14" 416.75 308.92 440.06 334.8 269 227.04 158.43 121.25 207.23 100.36 119.45 -0.951864259413247 9.81e-06 -0.856167385500174 0.132547876556315 -1.90221588196155 0.000280767695303692 -1.65099340402703 0.0012791410506077 7.62 8.25 10.4 10 8.6
"1191" "Fam169b" 449.51 394.03 420.98 301.87 261.68 228.2 131.24 151.86 81.27 136.75 41.51 -1.01894046815347 9.9e-06 -2.26857675527903 2.74e-05 -1.51783072163492 0.0052406660101491 -3.2378407175986 6.84e-09 0 0 7.22 0 0
"1192" "Pdcd1lg2" 84.89 66.1 80.21 63.59 64.51 33.12 12.9 16.86 19.07 19.84 11.99 -1.21043555372726 9.91e-06 -1.95031083674463 0.00226574040869779 -1.89320365467051 0.00295833794626338 -2.61978402164316 4.4e-05 0 0 8.77 0 6.53
"1193" "Cnr2" 875.94 803.27 868.93 799.85 632.76 484.37 196.8 378.18 82.15 103.61 23.34 -0.984471861116865 1e-05 -3.34889083335622 1e-08 -3.0140600610621 1.55e-07 -5.16434684748631 2.07e-15 0 8.3 8.36 9.62 6.88
"1194" "Serf1" 8.2 10.14 7.57 18.06 35.69 47.56 83.83 51.75 12.28 15.09 29.8 2.31521909701364 1.01e-05 0.159791028157532 0.916752659181222 0.457073273314036 0.763814974019168 1.43879279813688 0.143174063945125 0 6.16 7.55 6.73 7.2
"1195" "Mylip" 641.85 597.39 540.21 578.57 353.32 282.09 214.17 318.37 162.49 119.92 77.28 -1.01359744117447 1.03e-05 -1.85915311557634 0.000510927486098542 -2.29743176135389 2.08e-05 -2.93133705046598 7.88e-08 5.49 6.68 8.93 7.85 8.84
"1196" "Mgst1" 115.29 131.72 57.72 92.12 165.76 212.35 226.37 267.94 112.52 120.16 21.1 1.13642903828176 1.04e-05 0.18158765228329 0.704862376465214 0.276362912482862 0.572111552337295 -2.23327890143686 0.0122080447167797 0 5.79 5.96 7.42 0
"1197" "Dis3" 150.92 145.05 151.51 150.75 214.16 246.98 395.34 272.45 359.91 425.62 261.27 0.916183868126349 1.05e-05 1.26693592725244 0.000257201196604008 1.50886568461524 4.48e-06 0.80484121806897 0.0375964434745953 6.68 8.1 9.22 9.76 8.55
"1198" "Cisd1" 87.63 96.54 80.44 126.76 121.25 168.8 292.85 308.16 569.76 414.43 242.53 1.18698940752005 1.05e-05 2.5418211686762 8.46e-13 2.08259526931531 8.18e-08 1.30963004186042 0.0042155234398321 6.84 7.77 8.67 8.69 7.96
"1199" "Nup85" 294.82 262.02 291.75 325.75 373.38 408.35 781.6 642.36 830.6 1008.98 499.26 0.909379876513501 1.05e-05 1.5003756126362 5.16e-06 1.78104741338968 1.1e-08 0.766013065500026 0.0551091819005078 0 7.71 9.52 9.97 9.08
"1200" "Ilf2" 294.49 284.52 298.93 390.87 367.86 433.85 804.33 786.56 791.4 512.95 344.59 0.915103177527277 1.06e-05 1.31900292376623 0.000150406275616482 0.693414063883249 0.111568230029095 0.11947669362341 0.916034563447612 0 0 8.75 8.06 7.41
"1201" "BC024659" 37.99 31.97 30.45 34.4 58.52 59.71 108.45 58.48 45.72 45.84 83.27 1.0808441086657 1.07e-05 0.43996979126016 0.416986903362274 0.443751431802587 0.406992683336448 1.30494121166871 0.00109901178483202 0 0 0 0 0
"1202" "2010015L04Rik" 40.01 12.66 34.88 13.51 10.29 3.44 6.29 8.08 3.59 29.44 1.94 -1.84657004950966 1.07e-05 -2.8150844307949 0.00378853418306879 0.22063749143906 0.724845566462392 -3.70301162243083 0.00026953480523416 0 0 5.86 7.54 0
"1203" "Mcm8" 28.37 29.92 25.42 28.59 37.78 52.63 99.66 65.32 88.34 75.82 85 1.18534410852822 1.07e-05 1.65378080975219 0.00011062749804134 1.43329243388268 0.00141954002968741 1.59817681862446 0.000148156365339779 7.05 8.2 9.58 9.52 8.73
"1204" "Ms4a6b" 268.52 310.81 229.02 257.47 202.11 137.15 45.93 105.2 202.27 389.84 297.58 -1.11996234538428 1.08e-05 -0.397609545242391 0.703552855267903 0.548990222270481 0.190111782805409 0.159385662503619 0.733003862837508 0 0 0 0 0
"1205" "Iigp1" 21.66 130.03 27.71 24.69 33.07 15.61 8.51 11.93 19.3 40.55 83.56 -1.56203037232962 1.1e-05 -1.40253274233765 0.102528516766391 -0.331431675388455 1 0.711678902574018 0.0611593551334911 0 0 0 0 0
"1206" "Rqcd1" 126.49 145.92 165.01 182.93 201.23 217.93 431.47 341.39 324.88 272.46 171.98 0.942254126449069 1.12e-05 1.06682452204695 0.00568746098430413 0.812962032268112 0.0574813131058697 0.149158389608164 0.888016841588664 5.66 7.65 8.86 9.21 8.22
"1207" "Npm3" 92.71 127.77 85.08 133.99 203.01 212.34 288.85 294.58 441.64 248.02 315.68 1.18413964724787 1.12e-05 2.00684355993473 2.65e-07 1.17442917713337 0.0140984462194011 1.52243557601219 0.000373136131080633 5.23 7.45 9.27 8.71 8.88
"1208" "Taf9" 300.28 247.42 218.9 293.79 333.41 431.54 617.11 657.57 574.96 372.71 357.43 0.943712493130308 1.13e-05 1.11693852622739 0.00306306759967525 0.491530462887684 0.295331651012779 0.431137663544716 0.363407733298543 6.98 7.95 9.43 8.74 8.76
"1209" "Samd1" 84.58 83.62 99.96 94.16 103.28 116.73 242.46 280.63 149.04 241.39 137.3 1.03629192480477 1.17e-05 0.718435134891526 0.144674629293811 1.41410146668243 0.000343372776287543 0.600067180984352 0.245310716190855 7.05 7.41 7.16 7.42 7.47
"1210" "Fgl2" 36.22 96.34 33.14 54.09 39.05 23.95 8.47 15.46 40.31 136.47 144.37 -1.33819969835106 1.17e-05 -0.446916059775312 0.746068765462225 1.31245809238642 0.000370843098140602 1.39364523412195 8.65e-05 0 0 6.14 7.27 6.06
"1211" "Orc2" 212.5 183.18 178.4 204.84 294.21 320.41 431.1 400.68 443.17 559.91 331.17 0.892919515743465 1.17e-05 1.18638506072195 0.00060244009030414 1.52371978482387 2.18e-06 0.766096826010185 0.0448995199062602 0 7.74 8.92 9.36 8.49
"1212" "Akap17b" 45.35 48.53 34.66 37.89 76.06 84.65 86.55 78.93 32.92 110.31 29.29 0.970797042751497 1.17e-05 -0.337879270432409 0.851508821764144 1.40664807107042 7.5e-05 -0.506435412974668 0.603579935772091 0 0 6.09 6.76 5.43
"1213" "6030408B16Rik" 1.84 0 1.36 0 0.93 5.27 16.99 7.58 0.61 12.43 2.97 3.26538063344618 1.18e-05 -0.391190757324476 1 3.95768248616512 5.97e-05 1.8923910259134 0.145686019626724 0 0 0 7.6 0
"1214" "Slc7a6" 154.8 138.01 160.04 158.51 269.33 271.21 329.94 289.84 440.28 467 501.96 0.924428667386647 1.19e-05 1.52639914761219 3.4e-06 1.61140038712688 6.4e-07 1.71555024100768 4.02e-08 7.84 8.55 9.72 9.95 9.39
"1215" "Eprs" 550.94 570.6 483.3 612.45 845.86 1006.11 1328.08 1016.63 1323.83 1451.29 1279.98 0.920450987790764 1.2e-05 1.25592039690484 0.000328678643311961 1.38853835770011 4.95e-05 1.20732379489201 0.000498482804747254 7.57 8.14 9.91 10.5 9.18
"1216" "Eef1g" 551.89 558.65 678.48 932.87 1110.34 1192.69 1229.06 1665.97 1040.1 475.6 1342.18 0.933364522352401 1.21e-05 0.612113478126741 0.203104349034291 -0.516788144051593 0.350585450081438 0.979969400355404 0.0110634966362094 6.46 8.7 10.1 9.51 9.78
"1217" "Mphosph10" 232.05 211 190.86 264.48 308.43 363.29 517.83 506.34 419.99 392.5 522.92 0.916628821575397 1.21e-05 0.903013108444729 0.0207057620880719 0.805350784848455 0.0465348187591363 1.21924838050691 0.000467765664349842 5.76 8.11 8.78 9.34 9.41
"1218" "Dazap1" 308.22 383.81 319.25 339.26 420.88 522.51 824.16 719.29 724.03 442.77 432.16 0.880777319540208 1.21e-05 1.10058501145624 0.00172705638096074 0.391093010446774 0.394873980101603 0.356101080164529 0.428373235192256 8.45 9.35 10.6 10.3 9.77
"1219" "Clec2i" 1237.77 979.57 991.32 1051.32 846.45 696.33 205.34 410.05 171.01 200.95 714.39 -0.981038146194265 1.24e-05 -2.63869406133101 1.3e-06 -2.40593817470976 8.77e-06 -0.576062866288079 0.386767928029404 0 8.68 10 9.86 9.71
"1220" "Kpnb1" 622.28 583.95 629.08 681.06 913.93 1031.76 1799.08 1171.58 1438.37 1502.52 1330.41 0.966243558652542 1.24e-05 1.19309076841758 0.00149964892858863 1.2560401270819 0.000742435256846805 1.08052685011275 0.00429308067179522 7.97 8.68 10.6 11 10.7
"1221" "Col10a1" 82.98 64.49 77.54 33.7 44.39 28.51 18.2 12.55 55.09 20.23 36.26 -1.31961570360386 1.25e-05 -0.231473452035542 1 -1.67676759504235 0.0155521661772766 -0.834884989856475 0.301911867589167 0 0 0 0 0
"1222" "Ncbp2" 119.2 83.26 119.15 114.01 160.2 187.95 338.25 201.52 166.92 187.61 157.98 1.02735950621826 1.27e-05 0.616086633737997 0.227043908068776 0.784666536548498 0.0928106319597918 0.536671735241821 0.297809264114818 6.86 8.05 9.46 9.92 8.77
"1223" "Ckap4" 89.51 79.49 124.58 159.65 246.79 189.36 259.82 228.2 267.62 261.44 118.02 1.02791489958074 1.27e-05 1.23994257813969 0.00193734666620268 1.2062365300442 0.00304495804745735 0.0587880048982037 1 5.19 6.73 6.65 7.53 6.01
"1224" "LOC100042049" 362.39 365.69 280.9 515.44 710.96 946.61 525.2 853 580.54 197.5 771.46 0.993802050358 1.29e-05 0.607206938113291 0.203873152384239 -0.948335882773972 0.136644554573269 1.01740281930952 0.00984695053409849 0 0 0 0 0
"1225" "Psma7" 991.33 1142.87 866.96 1043.38 1301.1 1567.53 2227.26 2245.12 1968.06 2228.13 2017.63 0.86000293827552 1.3e-05 0.960798575493142 0.00704345152759532 1.13985777989879 0.00083037879705826 0.99668600315194 0.00386577559261629 6.49 7.61 9.47 9.66 8.93
"1226" "Usp35" 21.84 24 29.35 15.81 7.12 9.38 5.53 6.97 6.06 7.25 15.58 -1.64981364507112 1.32e-05 -1.90847684650047 0.029154689273012 -1.64981364507112 0.0600844278572726 -0.546171311911752 0.675592519679323 0 0 0 0 0
"1227" "Arid3a" 154.23 155.41 161.33 176.42 239.59 250.92 375.41 335.64 156.89 157.48 185.44 0.892201705323636 1.33e-05 -0.0448816815239333 1 -0.0394664633192797 1 0.196317390528151 0.739377456805352 5.12 7.87 9.44 8.93 8.74
"1228" "Zswim6" 78.57 64.56 78.96 64.64 42.04 32.51 28.81 27.8 9.5 18.11 13.72 -1.12836505199695 1.33e-05 -2.9156215351717 1.57e-06 -1.98483440743985 0.000665244187903394 -2.3853404722172 4e-05 5.86 6.83 7.17 7.62 7.82
"1229" "Atp5g1" 49.52 62.32 47.66 66.07 88.57 134.04 175.53 191.01 160.27 248.4 145.37 1.38505978964777 1.33e-05 1.50692919391742 0.00506428559220197 2.13908996632345 3.81e-06 1.36615436383238 0.0115060174649797 5.64 8.36 9.1 9.64 8.98
"1230" "Shisa5" 3790.43 4456.96 5084.81 4868.4 2827.96 2257.5 1008.08 2641.86 393.62 743.92 2956.84 -1.05904033924529 1.33e-05 -3.53103867430014 1.49e-07 -2.61269471629626 4.82e-05 -0.621857927189384 0.399911915206523 0 7.29 7.69 6.98 11.2
"1231" "Kif19a" 21.46 20.53 18.97 18.07 6.66 6.65 3.76 4.93 5.27 1.62 0.68 -1.84489688441858 1.33e-05 -1.90652554119339 0.0576323302218026 -3.60833468994598 0.000808451957223962 -4.86072185158027 5.79e-05 0 0 0 0 0
"1232" "Nyx" 15.68 10.56 10.1 9.06 3.79 2.58 1.05 2.06 1 1.53 0 -2.25973333328002 1.35e-05 -3.50462039240355 0.010894926608784 -2.89108873948563 0.0256229965244067 NA 0.000197637979741911 0 0 0 0 0
"1233" "Xkr5" 4.18 3.38 1.69 3.63 6.33 9.15 20.33 14.93 37.21 19.24 12.53 1.97799092594932 1.36e-05 3.53055779701116 1.33e-10 2.57897620565543 8.6e-05 1.96025382120724 0.00643360572600174 0 6.57 8.65 9 7.12
"1234" "H2-Eb2" 494.27 497.54 530.09 595.06 351.84 322.01 157.78 274.36 146.97 117.01 94.17 -0.936655668597744 1.37e-05 -1.84840040728524 0.000367655665692027 -2.17729027293191 3.2e-05 -2.49058266998597 1.86e-06 0 7.58 8.5 8.57 0
"1235" "Mrpl20" 394.18 369.99 225.42 335.91 485.22 627.22 729.96 753.78 960.97 1017.36 702.12 0.969853742448068 1.38e-05 1.53602662789733 1.22e-05 1.61829360713427 3.08e-06 1.08325285889844 0.0044006358487153 6.39 8.36 9.64 9.97 9.66
"1236" "Npm3-ps1" 142.11 164.74 111.31 173.51 190.98 288.33 371.36 390.22 527.06 369.55 551.87 1.06851058018348 1.38e-05 1.83317445959772 6.02e-07 1.32097682714767 0.00142306091791391 1.89953571523213 1.04e-07 0 0 0 0 0
"1237" "Iqsec1" 726.65 699.52 813.09 501.94 451.55 395.84 257.4 254.67 201.39 191.37 173.46 -1.01177388918655 1.39e-05 -1.76674363875177 0.00252918615233285 -1.84037100264809 0.00164014581202397 -1.98213267235046 0.000527590085160708 0 0 6.48 0 0
"1238" "2310021P13Rik" 207.89 178.02 266.71 179.71 130.07 101.67 99.21 97.73 81.42 117.46 92.51 -0.9572545276994 1.4e-05 -1.35370051111678 0.00913429111000968 -0.824986094759365 0.134346475830941 -1.16947440836435 0.0221943388898817 0 0 0 0 0
"1239" "Gm5643" 124 150.85 106 192.21 166.05 332.69 429.34 227.36 323.34 249.22 307.73 1.01168424136375 1.4e-05 1.17436579394447 0.00306457943350923 0.798733651217716 0.0778169986851925 1.10297889744796 0.00546756952000524 7.13 10.6 11.4 11.6 10.8
"1240" "Arhgap33" 12.92 8.69 24.15 14.52 18.51 23.37 72.23 35.9 85.3 81.63 19.7 1.31530735513633 1.42e-05 2.50086632460783 3.65e-10 2.43742004037301 1.61e-09 0.386516212745915 0.636612577013393 0 5.66 8.53 8.8 7.17
"1241" "Slc25a39" 116.29 143.01 169.65 203.21 221.1 217.25 426.91 411.65 311.23 260.68 286.56 1.01429518711419 1.42e-05 0.97769137947815 0.0274379450480776 0.721990148638727 0.149226980008275 0.858547491008291 0.0594669427648745 7.06 9.53 10.6 11.1 10.2
"1242" "Foxo1" 513.48 488.34 516.05 351.41 316.61 254.9 232.61 138.97 279.94 174.68 38.57 -0.987015326603486 1.44e-05 -0.739293136765678 0.271470100707003 -1.41969634563995 0.0115649955384054 -3.59885973079144 6.17e-10 6.05 6.8 9.43 8.92 8.28
"1243" "Anp32a" 578.26 531.73 451.05 463.79 574.97 858.26 1378.96 825.89 628.56 572.74 497.99 0.845376479881332 1.46e-05 0.312321582861043 0.459353256039613 0.178151481734941 0.673124295796596 -0.023612110438706 1 5.94 8.12 9.53 9.81 9.23
"1244" "Pmm1" 73.12 74.23 79.94 78.7 123.21 130.64 236.05 200.1 152.79 241.19 239.9 1.17311185664003 1.46e-05 0.998065617818465 0.0503143911867357 1.65668558752004 0.00010313404772841 1.64894865238057 8.04e-05 5.2 6.74 8.52 8.73 8.02
"1245" "Lmna" 8.05 11.37 7.64 9 10.44 12.51 44.59 34.81 22.19 10.22 33.41 1.50503980047843 1.48e-05 1.29951027076467 0.0407388811539195 0.18099579950528 0.77915444300279 1.88988058590263 0.000516089244310045 0 6.25 8.4 7.08 7.78
"1246" "Mrgpre" 55.56 43.51 66.67 54.92 31.6 25.38 16.16 20.53 10.58 12.11 13.69 -1.23616615942798 1.49e-05 -2.38241359713545 0.00032266670267987 -2.18755435955515 0.000808451957223962 -2.01063077799158 0.00162556084104298 0 0 7.18 7.88 8.29
"1247" "Ndufa8" 256.63 323.24 198.02 271.08 398.29 467.53 643.51 586.64 481.32 542.68 435.46 0.998644649294056 1.49e-05 0.876094858926405 0.0407616008694046 1.0492002273277 0.0100320077353183 0.731638690375158 0.0912275958418161 0 5.78 7.7 8.53 7.05
"1248" "Lsm3" 375.22 365.32 241.81 422.84 479.5 639.64 809.03 855.58 703.19 663.73 480.32 0.98626443820731 1.49e-05 1.00122124450124 0.0153968701169413 0.917903174531717 0.0289576414183301 0.451302572378122 0.360719272366548 6.51 7.8 9.42 9.46 8.57
"1249" "Krba1" 55.87 51.32 63.05 49.98 33.67 28.59 19.63 20.79 19.97 25.85 10.69 -1.10079029689787 1.52e-05 -1.46303926002932 0.0123557849983691 -1.09070931227099 0.0702325308796747 -2.3646117397528 4.36e-05 0 5.99 6.5 0 0
"1250" "Mrpl35" 63.1 42.02 54.58 58.54 81.14 91.82 133.84 135.84 134.77 162.65 102.93 1.02021827941865 1.52e-05 1.30458383674787 0.000943288200452571 1.57585527290432 2.13e-05 0.915747982254639 0.0350178730721408 0 7.84 8.31 8.94 7.8
"1251" "Cass4" 35.25 32.47 35.9 20.77 14.55 13.3 8.23 9.58 8.53 10.56 2.85 -1.44586774386158 1.55e-05 -1.86618095676799 0.0144701816100757 -1.55818876872783 0.041804499257521 -3.44776477903418 1.68e-05 0 0 7.38 7.21 6.59
"1252" "Ptbp1" 577.42 638.93 692.41 642.53 754.83 852.19 1617.24 1485.71 1135.86 761.31 714.17 0.884490974165237 1.57e-05 0.832558130458676 0.0340781607949949 0.255329037101455 0.64531223440879 0.163112540796876 0.80791088258367 7.61 9.78 11.2 11 10.9
"1253" "Hivep2" 442.97 380.03 442.21 364.62 247.89 214.35 201.58 155.48 170.84 103.38 17.01 -0.992257771545509 1.61e-05 -1.25400378327717 0.0330036845263823 -1.97869247897321 0.000509656002999208 -4.58219454025593 8.5e-13 5.44 8.11 10.1 9.05 7.68
"1254" "Angptl1" 630.46 541.57 587.52 301.55 411.55 370.02 169.62 91.86 162.97 314 43.82 -0.982606185902323 1.61e-05 -1.66073618450203 0.00256929640186351 -0.714578038708869 0.297124626867325 -3.555681208385 5.94e-10 0 0 0 0 0
"1255" "Capn5" 58.33 82.59 77.68 72.34 136.77 124.43 155.34 150.34 11.48 14.61 205.34 0.962321711000827 1.62e-05 -2.6635271124418 1.66e-05 -2.31569357631399 0.000128657198185404 1.49729303061868 1.43e-05 5.74 6.5 6.37 6.55 9.86
"1256" "H2afv" 180.9 240.19 139.62 172.3 214.55 280.95 462.49 418.6 237.32 301.49 216.01 0.909194149496628 1.62e-05 0.373000807625125 0.403296974135242 0.718277270464597 0.0772488156885076 0.237265221994355 0.582280484213456 0 5.91 6.76 7.15 5.52
"1257" "Fam96a" 287.29 341.25 225.74 379.9 418.01 531.61 626.89 757.93 656.28 591.36 480.03 0.919523687890062 1.63e-05 1.08883055216391 0.00360083956175697 0.938555746098524 0.0166467439504305 0.637643655688119 0.131287835910362 5.84 8.3 8.8 9.29 8.49
"1258" "H2-M3" 730.72 859.96 830.29 823.6 571.55 447.06 249.49 398.35 309.69 275.19 549.38 -0.961249260172819 1.67e-05 -1.3891305880494 0.00860715886473247 -1.55952734110338 0.00288803104288413 -0.562150996152659 0.371754669951918 0 7.31 7.66 7.88 8.02
"1259" "Glrx3" 49.02 37.62 34.05 34.9 62.56 91.12 103.53 111.6 157.75 139.28 126.16 1.24512843471169 1.67e-05 2.01989066605351 1.77e-06 1.84023876894734 2.59e-05 1.69750522608675 0.000134402950815492 5.5 7.95 9.43 9.74 9.15
"1260" "Abcb1a" 14.81 12.96 14.34 12.82 8.08 4.17 1.98 2.04 6.3 14.96 16.46 -1.75538004084597 1.67e-05 -1.12417055813121 0.303823891131036 0.123515883369143 0.858538758469101 0.261370043903132 0.691686798941021 0 0 6.11 0 0
"1261" "Tomm7" 370.34 381.26 177.01 279.75 460.75 672.68 514.44 593.7 603.42 874.51 739.68 0.891459219892817 1.71e-05 0.998184086823724 0.00531810081953429 1.53349645369343 2.08e-06 1.29192283995692 9.58e-05 5.47 7.16 7.8 8.96 7.41
"1262" "Casp4" 273.31 311.11 188.18 240.18 198.52 139.11 43.5 77.1 17.68 51.98 62.11 -1.14417700126899 1.71e-05 -3.84005873540441 8.41e-09 -2.28422037632364 0.000197580447600178 -2.02735144234914 0.000709351309811255 0 0 0 0 0
"1263" "Tmem41a" 8.94 8.84 13.87 10.5 15.56 26.11 65.23 44.62 62.47 73.18 53.7 1.84590369963894 1.73e-05 2.56763089873607 2.74e-05 2.79591678450964 1.66e-06 2.34938945704333 0.000190239773299927 5.89 7.1 8.78 9.34 8.36
"1264" "Tomm20" 215.5 288.83 175.1 258.28 336.1 500.78 434.42 569.97 1034.86 791.62 982.32 0.973487472889164 1.76e-05 2.14222188426101 1.12e-11 1.75566624403096 2.27e-07 2.06705125461868 7.38e-11 6.9 8.6 10.5 10.7 10
"1265" "Bmp2k" 706.98 610.11 612.7 599.36 541.24 390.19 150.24 204.72 113.27 119.75 395.53 -0.975324506958716 1.78e-05 -2.48081489009371 2.02e-05 -2.40055504249041 3.74e-05 -0.67679357465187 0.334952305018279 5.45 8.1 8.41 8.79 8.37
"1266" "Hspa1b" 299.63 96.06 78.75 5.99 373.12 478.16 22.17 3.37 3.86 9.88 9.58 0.867954464520081 1.79e-05 -4.95958158387421 1.45e-10 -3.60367138955762 3.41e-07 -3.64815677540611 1.68e-07 0 0 6.61 6.54 0
"1267" "Irf1" 613.08 1237.85 663.05 684 507.51 414.31 250.44 401.16 259.08 304.21 382.48 -1.0232570891402 1.79e-05 -1.62569136200012 0.00432988416839822 -1.39402143303895 0.0167022161498527 -1.06370470039609 0.0769427623672806 5.24 7.68 8.62 9.19 8.79
"1268" "Rpa3" 162.83 194.7 111.88 161.17 223.51 377.29 345.3 426.81 266.47 362.18 190.75 1.12248573573999 1.79e-05 0.757293706117293 0.13541092725804 1.20002746816244 0.00757086675365915 0.275003644029345 0.609324696262294 0 6.02 7.52 7.86 6.64
"1269" "Eftud2" 412.81 407.45 407.19 399.99 524.1 565.32 1214.37 651.57 784.3 871.93 449.05 0.860729524002899 1.81e-05 0.946873150035203 0.00919018831147346 1.09967986729431 0.00165279986291873 0.142343642101304 0.802372750969542 0 7.56 9.21 10.1 8.44
"1270" "A830007P12Rik" 445.41 496.85 465.92 532.94 260.79 264.53 189.25 285.93 209.28 185.37 175.46 -0.956168140943705 1.81e-05 -1.21338295712609 0.0233969631266029 -1.38840962380001 0.00818798150604086 -1.46767522940541 0.00417639420300261 0 0 0 0 0
"1271" "Man1a" 2005.32 2006.41 1998.17 2110.64 1475.84 1138.94 473.69 834.84 498.54 368.21 103.21 -1.0495043326514 1.82e-05 -2.02579449901018 0.00157590905374847 -2.46297495335083 0.000136947390429606 -4.29792100186176 7.66e-10 7.29 7.26 9.02 8.7 0
"1272" "Pion" 153.21 171.58 183.7 162.37 130.83 104.45 51.32 52.82 58.92 48.06 134.36 -0.982940148806231 1.84e-05 -1.50918239013531 0.00563699752578337 -1.8031031720413 0.000870198383609359 -0.319908024936664 0.711123743582102 0 0 0 0 0
"1273" "Dbi" 224.08 302.12 167.02 287 389.99 465.41 602.1 574.57 670.99 766.21 530.83 1.05177261208581 1.87e-05 1.4531856823982 0.00024035448722927 1.64463427166579 1.44e-05 1.11514432411402 0.00784029041787487 0 8.11 9.89 10.3 9.33
"1274" "Grwd1" 132.1 150.71 154.34 200.4 200.41 231.3 391.42 422.74 306.82 342.85 203.03 0.966543143355356 1.88e-05 0.944854037605549 0.0273996907644225 1.10503903211718 0.00637280434404824 0.349154427734933 0.548156746898724 6.52 7.59 9.17 9.59 8.45
"1275" "Timm50" 141.39 199.57 170.28 203.75 227.17 233.21 486.47 479.74 433.62 450.4 301.73 0.996575796508003 1.89e-05 1.27850823593443 0.00125038656951247 1.33328376322124 0.000691295813218482 0.755335081739221 0.0991462208757778 6.88 7.62 9.12 9.16 8.15
"1276" "Pacs1" 176.38 135.89 204.68 158.83 121.05 90.8 76.11 58.03 46.1 48.87 36.38 -0.965823313081783 1.9e-05 -1.87371499818551 0.00040636249693024 -1.78953264425553 0.000702790757931717 -2.21533620585072 2.54e-05 5.82 7.66 8.19 7.71 7.49
"1277" "Pcnx" 116.03 117.19 111.8 92.74 77.41 70 38.17 38.78 49.56 76.87 108.74 -0.964324647204113 1.91e-05 -1.1428920427453 0.0418856909922249 -0.509647561760007 0.48879921703436 -0.00925740208779636 1 4.96 5.29 6.42 7.61 6.87
"1278" "Hsd17b13" 2.09 0 0.52 0.51 5.28 7.8 8.78 10.18 7.67 68.71 2.71 3.36025621354646 1.92e-05 3.29768054864069 0.00462192591120609 6.46090214883906 1.18e-21 1.79674682249162 0.186840092660214 0 6.82 0 8.29 6.52
"1279" "Dnahc8" 77.78 69.86 87.01 58.66 100.35 121.74 205.51 106.18 105.5 386.68 120.93 0.863818992068818 1.93e-05 0.524816740301033 0.22040167089693 2.39871388813478 7.06e-18 0.721745930391359 0.0584039667862232 0 0 0 0 0
"1280" "Egfl6" 11.18 9.29 4.3 7.22 10.16 14.99 46.14 23.83 0.89 144.83 0 1.57212772262998 1.93e-05 -3.16767184614928 0.110569392611646 4.17866757480194 1.71e-27 NA 0.009648547331201 0 5.56 0 8 0
"1281" "Tmem154" 191.57 244.1 233.08 177.44 175.87 126.36 55.46 68.71 107.51 24.93 54.62 -0.988774198394084 1.96e-05 -0.976510778728256 0.0960383512778438 -3.08502684854912 6.37e-08 -1.95348041727534 0.00026522351226224 0 0 7.99 6.42 6.61
"1282" "Ysk4" 99.44 75.56 113.35 72.74 75.01 55.09 17.95 24.78 19.61 28.79 71.35 -1.0630048032981 1.98e-05 -2.20269702630634 0.000208276587785009 -1.64871877293505 0.00512990847453636 -0.339373132135362 0.726926737139169 0 0 0 0 0
"1283" "Cchcr1" 14.99 17.52 29.19 23.67 29.91 33.95 84.85 65.98 95.68 58.07 49.73 1.3304539093909 1.99e-05 2.16448821026438 1.24e-06 1.44406385476896 0.0077287208558329 1.22038725186904 0.02965959084263 0 6.61 7.88 8.59 7.54
"1284" "Slfn3" 47.89 60.51 36.36 41.98 75 85.13 148.92 105.19 177.94 190.86 150.79 1.14943588215107 1.99e-05 1.93035986931352 1.18e-06 2.03148378951163 1.66e-07 1.69150976780236 3.66e-05 0 0 7.92 7.74 7.09
"1285" "4930503E24Rik" 177.62 195.33 112.46 182.87 266.07 287.22 312.3 432.45 397.09 400.03 418.74 0.957810238085798 2e-05 1.24901333116207 0.000887259581698098 1.25965549960197 0.000803695662559974 1.32560203915879 0.000262745427025855 0 0 0 0 0
"1286" "Mrpl19" 73.5 74.59 70.55 72.92 108.13 124.81 173.34 146.84 156.63 158.54 145.69 0.923799703177073 2.01e-05 1.10356775898376 0.00327495881620613 1.12105407597151 0.00269628306912961 0.999109050277513 0.00815320575457668 5.29 8.7 9.8 10.3 9.43
"1287" "Ndufb6" 187.76 293.01 195.5 212.48 386.86 458.55 472.3 573.36 510.3 624.11 455.81 1.08935320734766 2.03e-05 1.1995679869904 0.00615582614280985 1.49002267318315 0.000286806651256201 1.03665492145552 0.0206439649585723 0 5.84 7.54 7.69 6.68
"1288" "Cdc7" 117.94 93.21 107.01 117.69 133.1 185.78 271.27 246.7 274.14 418.09 357.78 0.941137342541128 2.05e-05 1.33108113881414 0.000258510882984619 1.93998182742297 1.27e-09 1.71524103302986 1.92e-07 0 6.77 8.3 9.07 8.27
"1289" "Eif3i" 1046.77 1154.54 757.92 991.13 1519.08 1661.59 1737.85 2096.89 1836.34 2022.48 2146.24 0.828543287976311 2.05e-05 0.894849066336877 0.0107370064197186 1.03414130270326 0.00230940951517118 1.11982727884931 0.000591997398717431 0 0 7.65 7.94 7.54
"1290" "Wdr46" 112.2 120.87 157.92 163.03 183.75 192.74 399.84 315.53 293.64 247.95 190.35 0.978777920197144 2.06e-05 1.08411044906327 0.00854913446627443 0.840111167163559 0.0672503067684161 0.458716511712351 0.407783751085548 0 7.47 9.07 9.28 8.19
"1291" "Osbpl5" 157.27 166.57 175.6 145.15 113.52 75.86 49.07 78.69 70.34 96.24 33.11 -1.02326195488506 2.07e-05 -1.19596456690318 0.0339455193013441 -0.743673259352407 0.230047583172725 -2.28304289113148 2.54e-05 0 0 0 0 0
"1292" "Sh2d2a" 49 49.2 55.32 41.73 31.7 24.64 13.09 15.38 42.83 37.59 8.61 -1.20301625936437 2.08e-05 -0.188628966025662 1 -0.376901727873687 0.721694699985812 -2.50316550051986 0.000105661010991767 0 6.14 9.07 8.86 0
"1293" "H19" 0 0 0 0 0.35 1.19 8.72 0.78 18.9 0.42 0 NA 2.1e-05 NA 8.37e-14 NA 0.394873980101603 NA NA 0 0 6.39 6.79 0
"1294" "Xpot" 109.12 105.1 118.89 117.22 161.94 187.62 277.66 206.75 278.84 187.9 246.78 0.889012897160964 2.11e-05 1.30845494266489 0.000135251738364524 0.738982476687456 0.0735725929831055 1.13224288760158 0.00128879468240006 8.81 10.1 11.2 10.9 10.7
"1295" "Rpl22l1" 660.97 563.39 482.62 568.65 1245.61 1237.67 764.44 1178.67 937.8 225.91 927.33 0.959864564039316 2.11e-05 0.72108617861758 0.0904893778249708 -1.33244596680136 0.0414320342511941 0.704888727776183 0.0936820459910216 6.26 7.3 9.3 8.99 7.8
"1296" "Psd" 72.48 69.52 96.32 67.5 55.55 35.92 23.57 26.23 9.89 16.52 23.1 -1.11422763060585 2.14e-05 -2.95056842786742 3.38e-06 -2.21039716720709 0.000273329363468604 -1.72671800232311 0.0034722231915453 0 5.59 7.45 7.12 7.98
"1297" "2310046K01Rik" 4.49 5.32 11.27 8.56 0.68 0.39 2.26 0.75 0.45 4.54 2.61 -2.86090439033434 2.19e-05 -4.04147663597616 0.0474422916089744 -0.706781245014919 0.74956438577893 -1.50542373573595 0.36894975755356 0 0 0 0 0
"1298" "Pno1" 212.54 184.93 124.45 205.3 289.49 307.35 405.84 380.95 385.72 426.45 248.56 0.927994417636078 2.23e-05 1.08516207613958 0.00435168015553712 1.22998472266876 0.000810429040487974 0.451202269504557 0.315639559844694 6.13 7.81 9.06 9.85 8.79
"1299" "Serbp1" 718.1 711.63 527.23 660.74 930.36 1200.06 1621.95 1225.67 1325.33 1073.36 1300.61 0.927278055317045 2.24e-05 1.01805186014287 0.00724496467401087 0.713834263005584 0.0792939847146647 0.99088865385974 0.00775251100612154 7.65 10.7 11.7 11.9 11.4
"1300" "Pitrm1" 191.76 175.07 179.01 192.64 220.89 248.09 488.82 387.76 401.57 225.7 535.43 0.865575969153072 2.25e-05 1.12109264471403 0.00158690915356689 0.289847569024497 0.564479278398196 1.53613912555617 1.32e-06 5.61 7.22 9.02 8.49 8.28
"1301" "Cct4" 1222.72 1129.99 1020.27 1367.06 1882.58 1943.71 2313.39 2599.96 2052.71 1934.21 2270.76 0.882674620278441 2.26e-05 0.792630589000926 0.0451688658646011 0.706845205108786 0.0837252399309517 0.938275999804812 0.0107655927925065 6.06 8.75 10.1 10.4 9.8
"1302" "Cd209d" 5.6 1.38 21.71 28.76 1.06 2.4 0.88 1.57 1.4 1.29 1.36 -3.28107685735594 2.33e-05 -3.35880816058851 0.180426439292711 -3.47686392211022 0.143875854913861 -3.40062833628314 0.146528793238193 0 0 0 0 0
"1303" "Spp1" 2.57 86.4 1.27 0 3.24 0 3.23 4.8 191.55 31.52 5.81 -3.00127955222657 2.34e-05 3.08588205291245 2.45e-15 0.482500467057583 0.290481839401326 -1.95715699899426 0.286123904321177 0 0 5.73 0 0
"1304" "St13" 665.06 541.97 510.5 646.51 785.03 915.38 1420.51 1136.35 820.68 887.63 616.84 0.848674143682151 2.34e-05 0.473637253917807 0.277898131175802 0.586775887093046 0.153246718651014 0.0617137809291492 0.941630062659405 6.59 9.28 10.2 10.4 9.82
"1305" "Maz" 315.37 290.66 501.65 370.87 412.13 475.68 1128.77 737.95 842.65 829.32 344.5 0.897623143817908 2.34e-05 1.18882239641614 0.00116212497625952 1.16581775832781 0.00169377428947412 -0.10160714373686 0.968544514977026 5.89 7.8 10.3 9.92 9.37
"1306" "Mtfp1" 6.92 17.11 11.51 18.41 27.5 36.42 53.87 57.74 59.6 79.58 40.24 1.70202275916505 2.34e-05 2.14368937097414 0.000438381715135178 2.56078293931836 4.52e-06 1.57700734543015 0.022367290535496 0 6.86 9.09 9.81 8.42
"1307" "Cd7" 56.82 52.51 66.6 106.04 35.52 15.91 10.1 26.32 14.79 36.35 2457.66 -1.68242748491763 2.34e-05 -2.2528477187143 0.0163038874093262 -0.95551440700641 0.328328608218812 5.1236717614121 1.21e-81 0 0 0 0 8.68
"1308" "Ubqln4" 104.25 95.99 140.51 143.27 173.49 165.23 300.08 292.29 281.05 140.68 159.64 0.943853964963691 2.35e-05 1.2157601531471 0.00146318272898972 0.217350578310122 0.804703410540025 0.399755522196086 0.487406793306645 5.57 8.39 10.6 10.1 9.36
"1309" "Sbf2" 59.02 58.53 60.54 50.49 124.29 110.81 120.58 76.98 136.52 131.05 82.17 0.920534569832373 2.37e-05 1.25641314155736 0.000378348254660241 1.19741817567427 0.000869142115879023 0.523984493885025 0.232100971991232 5.4 6.14 8.22 8.83 7.78
"1310" "Kdm5d" 268.27 209.58 245.62 0.32 0.5 0 154.4 150.43 116.81 0.2 0.21 -1.2452018277703 2.37e-05 -0.631407387997869 0.485258318854073 -9.82135546000162 3.25e-24 -9.75096613211022 5.1e-24 0 0 0 0 0
"1311" "Capns2" 21.42 28.24 38.68 16.59 7.2 6.13 2.25 3.34 3.56 2.19 11.53 -2.47144321666607 2.4e-05 -2.88140615903907 0.0718151905970066 -3.58235253040429 0.0286031655205309 -1.18596279235369 0.469920845644296 0 0 0 0 0
"1312" "Gm5506" 159.05 210.81 132.68 214.31 174.83 362.73 471.23 355.22 656.25 604 488.8 0.928111047848256 2.46e-05 1.87257424936059 5.25e-09 1.75287728124482 9.47e-08 1.44757301685111 2.59e-05 0 0 0 0 0
"1313" "Dgcr6" 19.14 42.59 31.82 32.31 60.84 71.53 136.64 64.95 138.54 50.18 40.8 1.40785546648071 2.55e-05 2.13848273092322 1e-05 0.673364527837121 0.340621760692167 0.374821209286806 0.607056518308574 0 5.64 7.33 7.19 6.31
"1314" "Cfdp1" 374.82 303.76 278.33 376.46 415.29 529.45 792.18 742.61 471.38 501.05 406.44 0.894989507874215 2.56e-05 0.499885280601479 0.28063090420832 0.587949310042939 0.181264960944093 0.286037124931542 0.562688499642336 7.4 8.76 9.78 10 9.36
"1315" "I830077J02Rik" 145.05 142.3 179.13 162.15 128.62 58.4 33.49 43.21 9.05 21.88 180.03 -1.25320413679132 2.59e-05 -4.1181495208426 2.87e-07 -2.84452648002061 7.71e-05 0.196026212429505 0.79279135894157 0 0 0 0 0
"1316" "Phf5a" 124.61 126.83 129.4 160.29 175.83 212.8 367.39 318.55 234.13 219.76 182.49 0.989712335347801 2.59e-05 0.791334578606367 0.0880136483543482 0.699953589634855 0.145753334666342 0.43184218415216 0.426653528085479 0 7.38 9.04 9.45 8.39
"1317" "Dnajc2" 297.69 291.41 293.92 322.45 426.31 489.49 698.13 599.24 582.45 735.16 404.43 0.876518525309048 2.62e-05 0.950610365407915 0.0119858775955865 1.28653442927468 0.00019082672327151 0.424366175566392 0.367080029545903 6.7 7.99 9.66 9.82 8.95
"1318" "Snord52" 0 40.49 45.37 60.1 263.38 140.69 386.27 367.39 919.64 263.61 456.18 2.98765387328539 2.62e-05 4.65549616181163 4.01e-09 2.8528320437372 0.0102384146243827 3.64403014087078 0.000107094184102111 0 8.24 10.5 9.65 8.93
"1319" "Ndufa4" 1104.85 1128.84 620.24 891.83 1261.52 1577.43 1743.22 2113.38 1786.56 2233.12 2209.58 0.837944103774202 2.63e-05 0.931925900799382 0.00875752357513727 1.25380231304722 0.000158543661623052 1.23851370067815 0.000148351403287648 5.93 7.06 8.29 8.65 8.17
"1320" "Slc46a3" 122.74 169.22 167.69 160 120.44 80.14 37.03 61.55 28.39 43.13 88.94 -1.05053627225198 2.64e-05 -2.44799880674025 3.34e-05 -1.84468993973014 0.00142960512571211 -0.800549251113131 0.197444491020901 0 0 6.56 7.83 7.36
"1321" "Btnl2" 48.07 40.54 43.17 43.23 20.69 21.46 9.48 12.16 16.47 10.84 0.91 -1.45603517578893 2.64e-05 -1.40952489924199 0.0881536629736807 -2.01300069761447 0.011613034735338 -5.58735509876965 1.46e-07 0 0 7.02 7.12 0
"1322" "St14" 125.1 152.23 130.83 102.83 91.48 69.74 29.88 54.8 215.82 15.49 42.82 -1.05522332317298 2.7e-05 0.756533507200109 0.0508814055594134 -3.04388600886686 3.04e-07 -1.57693835727092 0.00507445042336134 0 0 8.48 7.57 7.49
"1323" "Aimp2" 125.38 134.05 131.02 157.84 188.22 246.91 346.18 345.26 259.46 345.93 248.85 1.03892589258865 2.7e-05 0.920572979456358 0.0492635098838386 1.33554097236648 0.00118347028044451 0.860337225767547 0.0634699822444626 7.67 8.6 10.3 10.9 9.67
"1324" "Pole3" 123.02 159.52 83.42 110.99 148.02 195.73 432.46 291.76 362.33 172.48 197.31 1.16296118379297 2.71e-05 1.60346622979782 0.000278010373131362 0.53259105079398 0.351633906736989 0.726626043697057 0.165256443247157 6.44 7.98 8.56 9.17 8.36
"1325" "Cycs" 67.53 92.93 42 86.35 106.08 163.15 120.69 171.84 132.83 147.81 177.12 0.959833205156635 2.75e-05 0.879460323727882 0.0358138031402529 1.03362318130922 0.00987624534984292 1.29460643105743 0.000418973781868223 6.52 6.46 8.13 8.53 7.81
"1326" "2900010J23Rik" 526.92 559.87 361.33 570.17 682 910.57 1047.51 1095.45 805.4 943.12 763.37 0.888179463863216 2.76e-05 0.674643892990373 0.103619387329496 0.902379767843097 0.019299575839159 0.597320911292569 0.147167975334054 0 0 0 0 0
"1327" "6330503K22Rik" 47.52 37.92 45.61 43.54 51.47 59.88 143.35 88.19 112.44 101.38 59.58 0.973774902294766 2.83e-05 1.36518443081181 0.000346604515018529 1.21580214102094 0.00232497333631418 0.448929100680996 0.386089888278553 0 0 0 0 0
"1328" "Ache" 2.77 0.55 1.63 0 3.35 5.23 8.35 15.2 7.18 4.58 4.29 2.69842055050444 2.84e-05 2.53655531885608 0.0134650221647013 1.88791907312997 0.085371859449445 1.79354912253257 0.0990810503805095 0 0 6.36 7.69 6.49
"1329" "Ppp3cc" 631.89 593.52 633.48 566.07 419.04 325.44 228.52 282.71 381.9 192.76 117.74 -0.949457630643084 2.84e-05 -0.666694124998832 0.294535519338257 -1.65308333876872 0.00175698412008053 -2.36428451219596 6.85e-06 6.58 7.01 7.71 8.35 6.6
"1330" "BC048943" 0 0 0 0 2.4 4.09 21.96 8.01 7.92 194.15 0 NA 2.84e-05 NA 0.00435168015553712 NA 2.88e-31 NA NA 0 7 8.52 10.3 0
"1331" "Klk1" 9.65 9.54 16.3 31.37 2.09 2.37 0.87 2.32 17.89 34.24 279.19 -3.12761170203739 2.87e-05 0.0980100324345049 1 1.03453934678374 0.290481839401326 4.06203200809574 6.49e-19 0 0 0 0 8.58
"1332" "Pabpc1" 1382.75 1068.6 1433.66 1061.19 2110.83 2211.99 3898.54 1155.39 2776.21 2154.86 1388.47 0.922767392039547 2.94e-05 1.16679612498268 0.00158702810747035 0.80127356490315 0.0507554129453755 0.16717542948046 0.773715985774039 8.6 9.14 10.7 10.9 10.3
"1333" "Ypel3" 387.74 417.41 477.07 415.85 228.31 185.24 183.96 219.36 99.62 94.95 92.24 -1.05571752730604 2.99e-05 -2.09131671148986 0.000226685412792622 -2.16058412212559 0.000140499906040615 -2.20235960951067 8.13e-05 0 5.17 7.75 7.98 6.9
"1334" "Rpl28" 477.34 833.18 588.26 961.48 893.82 1395.26 1205.36 1969.32 1315.14 873.5 946.07 0.933747818356515 3e-05 0.879070091114197 0.0382587622064847 0.28873331311757 0.636250863323707 0.403872542923588 0.445273383181154 5.09 8.21 9.74 11.4 8.81
"1335" "Lphn1" 18.74 18.67 29.64 16.56 32.04 34.72 63.18 42.11 15.76 80.05 35.59 1.04108048379938 3.03e-05 -0.407407968368589 0.690879662398426 1.93722589957865 6.1e-08 0.76779642968482 0.114340664983101 0 5.72 6.46 6.8 6.79
"1336" "Mef2b" 28.8 15.13 20.61 48.22 8.17 5.41 5.09 7.57 0.9 4.14 2.62 -2.10341575795234 3.09e-05 -4.96911466624075 0.0021401509428731 -2.7674808050711 0.0264600114910828 -3.42754476103297 0.00908408853747229 0 7.41 7.87 8.36 7.36
"1337" "Nfix" 3.73 7.38 6.51 5.72 9.5 17.48 31.35 14.83 10.49 15.91 13.47 1.64825051404137 3.11e-05 0.84621011686992 0.315372547940496 1.4471292746237 0.0358126317369925 1.20694528975496 0.089694206197448 5.59 6.8 6.85 8.73 7.63
"1338" "Rrs1" 95.55 133.55 117.2 119.89 157.56 222.91 345.71 188.86 371.5 349.33 191.41 0.972916752358531 3.15e-05 1.67244415246856 1.79e-06 1.58367248650653 1.04e-05 0.715748145476084 0.113023960872309 6.96 8.18 9.75 10.4 9.39
"1339" "Zfp422" 79 82.64 82.32 113.99 99.35 129.16 238.58 224.51 125.72 121.45 70.62 0.950179789283559 3.15e-05 0.490456097552665 0.371536168128287 0.440604410277142 0.422247556871495 -0.341609353486485 0.701092678253094 0 6.38 6.99 7.83 6.15
"1340" "Rpl32" 9412.14 9860.82 5274.02 9965.22 16138.01 17698.19 10650.4 20297.26 11004.82 10793.93 18423.67 0.908527988291828 3.17e-05 0.351029105897093 0.419944134289265 0.323113794265606 0.451104323700615 1.09445403316705 0.0024445180012381 8.03 9.49 11.2 11 10.7
"1341" "Kis2" 5.95 9.41 2.2 4.8 7.65 17.88 27.68 26.01 45.71 59.62 2.3 1.82494451306143 3.2e-05 3.03158963076084 1.25e-07 3.41487618714798 1.63e-10 -1.28121442189882 0.818353227322676 0 7.23 9.3 10 0
"1342" "Ccdc88b" 115.46 132.47 178.13 139.78 83.87 73.44 57.45 78.27 122.79 75.27 210.73 -0.949345793114229 3.22e-05 -0.204201093801004 0.855709281560815 -0.910247289834916 0.0931733617876488 0.575001547693389 0.212380968779418 5.48 6.79 8.73 7.94 8.89
"1343" "Ppm1g" 492.12 543.96 433.57 436.87 531.56 740.91 1388.45 699.6 1114.41 1322.32 772.93 0.81774282448881 3.23e-05 1.22533844345676 0.000191015840511445 1.47212968425349 2.71e-06 0.697468002786892 0.0568889107297534 6.7 8.22 9.64 10.4 8.75
"1344" "Serpini1" 118.75 119.32 111.64 113.17 88.99 52.99 32.25 43.67 9.24 37.94 40.34 -1.08697203192633 3.23e-05 -3.64660156651354 1.98e-08 -1.60884664451812 0.0070048532828802 -1.52035523931664 0.00914694219316676 6.15 7.45 8.96 8.88 7.63
"1345" "Clca1" 1.2 1.98 0.59 2.05 3.63 1.37 1.51 23.09 2.39 9.93 7.36 2.34650611760803 3.26e-05 0.715991465072465 0.567278110436269 2.77077456462009 0.0010847465642565 2.33868661314873 0.00900053148206166 0 0 0 0 0
"1346" "Lilrb3" 246.2 211.47 290.78 265.8 180.61 130.46 66.28 147 48.62 58.23 187.03 -0.951811275165514 3.37e-05 -2.38271959895227 1.05e-05 -2.12250687354618 6.91e-05 -0.439071697479749 0.500243384541024 0 0 0 0 0
"1347" "5031414D18Rik" 827.49 789.8 898.34 888.76 603.42 437.57 274.52 494.43 148.73 162.59 538.09 -0.911454446332467 3.38e-05 -2.51662873401542 2.91e-06 -2.38808588553845 8.43e-06 -0.66147691795658 0.263208332597347 0 8.9 9.56 10.3 9.75
"1348" "Map3k8" 313.68 276.8 263.02 291.7 227.52 165.96 66.36 123.48 22.12 53.17 160.1 -0.973240130376978 3.38e-05 -3.69410437965201 5.09e-10 -2.42884329880387 1.1e-05 -0.838554362483096 0.15478266948921 5.38 6.67 6.37 6.66 8.22
"1349" "Bcar3" 839.73 784.32 719.23 684.43 626.84 442.69 158.84 348.54 171.73 98.3 36.88 -0.941126705166548 3.42e-05 -2.14001303283029 0.000102175001062072 -2.94489180099027 1.99e-07 -4.35924456178887 8.4e-13 5.24 7.05 8.93 7.98 7.62
"1350" "A430084P05Rik" 115.64 97.36 142.09 176.44 65.85 50.16 40.32 58.43 18.29 15.79 161.94 -1.30742581096411 3.46e-05 -2.86102414077593 0.000146129306793527 -3.07306804466441 5.52e-05 0.285308261663364 0.711250939466 0 0 0 0 0
"1351" "Degs2" 169.15 177 179.02 128.58 123.98 100.66 45.56 53.81 51.49 85.8 108.39 -1.0127007013121 3.47e-05 -1.66637486611157 0.00340207942125415 -0.929689488522121 0.134546899941035 -0.592507380755429 0.404708928444141 0 0 0 0 6.92
"1352" "Smc3" 324.22 224.55 239.49 250.52 316.19 363.18 770 385.12 481.2 284.2 295.02 0.820488897647139 3.48e-05 0.889818404949905 0.0135736816720831 0.130088317016609 0.785659980178337 0.183994523428238 0.681866190227586 0 5.8 8.3 8.06 7.79
"1353" "Herc3" 296.57 281.61 275.29 267.3 217.84 163.02 95.42 112.87 67.82 113.93 100.47 -0.927783342334912 3.52e-05 -2.04663564974165 0.00011885510608494 -1.29827065229119 0.0164506590240418 -1.4796535573392 0.00464608251829607 0 0 6.67 6.93 6.53
"1354" "Slmo2" 224.38 240.77 179.23 241.87 271.79 376.48 516.29 494.5 529.52 464.68 354.68 0.904580434921317 3.59e-05 1.25697145356688 0.000567786196620786 1.06852382970167 0.00538289773932876 0.678804258289367 0.108174562334537 4.88 7.91 9.3 9.52 8.99
"1355" "Ddx39" 538.82 601.87 620.67 645.45 772.48 804.91 1402.57 1344.15 1073.47 1122.3 873.24 0.845280967799849 3.62e-05 0.835159617005776 0.0323834096925486 0.89933611560894 0.0187946524877189 0.537327865539294 0.220229344411718 0 7.94 9.29 9.73 8.88
"1356" "D730005E14Rik" 222.71 179.14 252.32 254.6 145.21 132.61 85.3 118.31 63.18 82.23 151.51 -0.916589164655715 3.79e-05 -1.84637536768302 0.000386199706708396 -1.46617847588296 0.00453553758499429 -0.584502191929457 0.313927511350011 0 8.99 9.2 9.44 10.1
"1357" "Ppfibp2" 140.46 115.79 130.33 105.39 88.85 71.85 36.13 44.78 7.25 11.61 14.07 -1.02589017604668 3.82e-05 -4.08444553831976 2.28e-10 -3.40513046635649 2.55e-08 -3.12787610998552 1.37e-07 0 6.82 0 0 7.57
"1358" "Atp5a1" 2248.99 2358.32 1930.64 2479.5 3011.87 3384.12 5589.53 5468.93 3816.13 3713.86 3741.17 0.952803473751138 3.87e-05 0.759390800349592 0.0813645541154855 0.720199912987011 0.103275240332939 0.730770005344581 0.0879452798629803 0 7.55 8.93 9.02 8.38
"1359" "Alas2" 40.29 71.82 61.77 152.74 30.95 40.89 40.31 31.15 291.84 206.58 207.55 -1.1885745248923 3.89e-05 1.83756450012294 1.68e-06 1.33908745224927 0.00270818287670295 1.34584579744917 0.00196773947516122 0 0 0 0 0
"1360" "Satb2" 2.51 2.49 3.04 2.18 5.19 5.1 19.26 5.89 72.54 98.57 4.65 1.7939834076174 4.17e-05 4.82738154903266 1.36e-32 5.26975342966974 5.67e-44 0.863907425057773 0.345160771106946 0 7.51 9.66 10.5 7.21
"1361" "Naca" 140.13 132.79 125.46 170.13 184.14 248.84 236.84 349.48 251.64 133.3 216.11 0.842321096245838 4.26e-05 0.824175541152492 0.0343004649596973 -0.0925089456889207 1 0.604580105066419 0.145558029363063 6.81 8.97 10.5 9.84 9.79
"1362" "Ndufb5" 402.66 394.54 316.18 446.32 598.41 614.85 760.43 897.07 1009.01 743.94 641.91 0.880164162984645 4.27e-05 1.3716719115864 7.83e-05 0.931989614327008 0.0172313753209013 0.71917438026132 0.0783832243715223 7.11 9.25 10.8 11 9.74
"1363" "Atn1" 21.97 21.9 24.54 13.89 10.14 10.43 6.74 5.01 7.31 8.38 10.55 -1.34846523255719 4.27e-05 -1.49294911935655 0.0538574502429998 -1.29587028160964 0.0980674541107693 -0.96364943171444 0.247248201094061 0 0 0 0 0
"1364" "Slc17a9" 82.47 65.24 106.81 83.11 158.52 159.62 205.39 164.34 287.58 249.29 191.75 1.02669283698611 4.29e-05 1.76852024586786 1.38e-06 1.56238191190874 4.95e-05 1.18378347780539 0.00471640534587687 6.87 8.01 10.1 10.1 9.19
"1365" "Serpinb6b" 72.13 90.59 57.6 78.2 46.71 30.14 6.95 31.34 24 60.36 67.98 -1.37443847386916 4.31e-05 -1.63672128028982 0.0345163211556148 -0.306162880259014 0.913224224038428 -0.134645324244026 1 0 0 0 0 0
"1366" "Plscr3" 23.15 31.73 25.5 14.31 35.35 38.38 83.27 53.53 92.44 66.12 16.13 1.15274184934516 4.34e-05 1.96530518587726 2.06e-06 1.48187465070194 0.00124851607799828 -0.553465635434728 0.752842793397679 6.66 7.63 8.59 9.42 8.63
"1367" "Ssrp1" 843.06 903.33 844.68 1108.19 1066 1311.35 2574.21 1818.72 1242.26 1176.99 869.42 0.871978798023298 4.39e-05 0.425730452530045 0.394174732913049 0.347865360056604 0.50667327234248 -0.089111514237041 1 5.35 7.47 9.1 9.06 8.6
"1368" "Poldip2" 160.98 219.78 176.99 193.1 266.59 308.45 415.07 401.36 428.9 419.65 290.3 0.890013175326903 4.41e-05 1.19211659181664 0.00113686417823143 1.16066185665291 0.00173010002859158 0.629019847807746 0.14195522166893 5.92 7.73 8.83 9.36 8
"1369" "Aldh18a1" 119.19 142.57 156.35 164.12 236.88 202.39 353.66 285.59 343.57 192.13 320.5 0.889391847147738 4.41e-05 1.2390148903579 0.000625452438987176 0.400493627444289 0.452196050998335 1.13873517912129 0.00183974382667962 7.27 9.09 10.3 9.85 9.91
"1370" "Maml2" 182.47 159.72 192.56 134.79 137.15 118.85 55.07 46.03 69.57 51.57 57.48 -0.906842114422914 4.42e-05 -1.26663302252918 0.0205119913395981 -1.69856629769712 0.00144679092362581 -1.54203828143901 0.00320903069435659 0 0 0 0 0
"1371" "Klf12" 18.55 12.92 16.97 15.31 11.01 6.88 2.78 2.36 0.84 1.94 0.82 -1.46891093084074 4.45e-05 -4.24589220385482 2.87e-05 -3.03829678444646 0.000753623694426033 -4.2806576220155 1.59e-05 0 6 0 5.8 0
"1372" "Mat2a" 634.14 598.9 657.44 737.84 1051.33 1120.07 1499.55 1109.56 1523.95 1283.26 1272.03 0.863023602113732 4.46e-05 1.21367463394548 0.000556951464178347 0.965672567419432 0.0109068543882194 0.952991760452644 0.0101182872195164 8.14 9.93 11.3 11.5 10.9
"1373" "Polr1d" 598.03 642.33 475.95 603.89 899.07 1105.74 945.21 1230.12 1118.58 1574.5 1254.79 0.849302091172076 4.46e-05 0.947419270296254 0.0101712531505889 1.44064458721881 1.12e-05 1.11319676658355 0.00123868809035885 5.77 8.64 9.85 10.4 9.68
"1374" "Prpf19" 422.67 380.45 378.1 441.93 501.6 535.3 1042.34 807.5 844.37 490.05 523.54 0.830644844536267 4.46e-05 1.05715089686942 0.00308325208116977 0.272204530929336 0.590125902260386 0.367575342955158 0.423947068065887 6.8 8.04 9.63 9.11 8.44
"1375" "Cdkn1c" 0.62 0.62 0.46 1.37 3.29 3.74 16.43 5.23 1.24 1.72 0.6 3.22423740739849 4.5e-05 0.692101465016696 0.608687725449875 1.16416990933192 0.512941014367974 -0.355204249761661 1 0 0 0 0 0
"1376" "Klf7" 151.22 154.89 157.85 136.22 84.28 86.33 47.27 44.18 43.39 49.13 45.61 -1.19549808221003 4.51e-05 -1.78996075305783 0.00855073715163975 -1.61071910012356 0.0172162511473789 -1.71797316901682 0.00937259844829944 5.86 8.11 8.89 9.11 8.71
"1377" "G3bp1" 653.7 701.51 618.12 806.2 1034.6 1106.34 1463.59 1398.66 1308.58 1349.65 1200.71 0.848007287373653 4.52e-05 0.913161172746739 0.0158287618238881 0.957744373280008 0.0103679691232222 0.789046794523046 0.0398682347824961 6.33 8.58 9.97 10.4 9.61
"1378" "Gbp11" 73.16 193.18 73.15 79.87 46.92 77.78 19.64 39.77 15.58 80 85.13 -1.18762126946975 4.54e-05 -2.75042212026675 3.41e-05 -0.390117353666331 0.83473865664268 -0.30044972323339 0.963818482558281 0 0 0 0 0
"1379" "Hjurp" 77.44 72.75 82.89 93.38 102.36 127.87 197.86 165.43 284.61 198.51 177.21 0.862390411330087 4.55e-05 1.80208011876761 6.31e-09 1.28230545115694 0.000242048448099899 1.11855378356286 0.00172802362755418 7.18 8.73 10.7 11 10.1
"1380" "Tmem181b-ps" 0 0.25 33.15 24.84 0 0.22 12.1 8.63 1.02 2.83 1.99 -1.47506011161198 4.55e-05 -3.8353692982272 0.000117287867879873 -2.36313639736681 0.00456262232700176 -2.87117001965505 0.000932825365507983 0 0 0 6.15 0
"1381" "Arhgap29" 5.46 5.4 5.08 7.31 10.24 11.01 27.31 15.97 50.22 39.07 151.51 1.47273930926146 4.58e-05 3.11103131238874 6.44e-13 2.74883053930092 3.02e-09 4.70411039661768 1.27e-45 0 0 6.84 5.63 6.13
"1382" "Rapgefl1" 10.16 10.62 8.57 11.71 11.42 19.19 40.51 31.57 2.32 26.15 12.65 1.32249016562239 4.61e-05 -2.14553691698103 0.0774832004674027 1.3490773190257 0.0178392689554568 0.301403757473071 0.67240255639737 0 5.53 6.37 8.59 8.63
"1383" "H2-Oa" 1202.22 1251.32 1294.62 1237.95 904.5 680.5 303.43 756.16 189.65 242.52 187.41 -0.914870637251147 4.62e-05 -2.71650343414398 4.74e-07 -2.36173907822469 8.74e-06 -2.73364487003891 2.87e-07 0 0 0 6.66 7.22
"1384" "Rogdi" 174.43 215.37 216.66 183.4 120.17 95.41 53.48 92.95 52.84 64.64 245.47 -1.12556741294519 4.63e-05 -1.90189459146 0.00225167944983557 -1.61109785995504 0.00965303676836809 0.313949753863672 0.555237911434325 0 5.21 7.52 7.08 8.25
"1385" "D630045J12Rik" 0.55 0.87 1.95 0.81 1.17 2.18 11.22 1.23 1.21 0.3 81.39 1.91834971098358 4.64e-05 0.211504105193712 0.9352409273002 -1.80046853647236 0.437979313492535 6.28327670092214 3.48e-73 0 0 5.21 0 6.94
"1386" "St3gal2" 50.53 57.98 58.49 46.01 28.63 27.62 21.24 17.58 12.41 18.39 33.77 -1.16385909546881 4.64e-05 -2.10134614044184 0.00122012023446768 -1.53392777616026 0.0184860048155735 -0.657107076564723 0.396878927067585 0 0 0 6.41 6.92
"1387" "Prdx4" 227.97 256.03 173.88 274.56 300.95 342.66 566.44 568.31 838.46 1059.64 870.15 0.931464603900414 4.66e-05 1.84673106466816 4.53e-08 2.18449140973515 5.91e-12 1.90025322522659 8.96e-09 0 6.13 7.94 8.44 7.43
"1388" "Als2" 61.28 64.92 63.59 56.84 37.94 35.32 27.03 23.58 16.02 33.67 315.84 -0.99352147506353 4.7e-05 -1.94440224655215 0.000486321219785624 -0.872812673133217 0.150828579289112 2.35684559549553 4.93e-17 0 7.85 8.44 9.31 8.76
"1389" "Loxl1" 11.22 15.03 18.71 4.51 4.38 4.35 2.28 1.22 13.37 4.66 6.66 -2.01612949563124 4.7e-05 0.112445565934729 0.863709634994606 -1.40815203950434 0.28144028473515 -0.892959817087361 0.563987509048587 0 0 0 0 0
"1390" "Dip2a" 28.51 27.25 40.43 28.87 18.12 9.96 14.82 11.72 29.4 14.16 5.89 -1.19511920314585 4.81e-05 -0.0887323621874074 1 -1.14272725182814 0.0881168714529025 -2.40820897808067 0.000252598268661057 0 5.75 7.58 7.48 0
"1391" "Lbh" 904.01 773.16 1171.77 994.48 585.76 505.59 448.42 551.09 240.13 131.44 107.18 -0.878294174323021 4.82e-05 -2.0005030801833 0.000160239560702988 -2.86991434886132 1.96e-07 -3.1642830131001 1.18e-08 0 8.19 9.21 9.16 8.54
"1392" "Spns2" 105.11 86.6 112.33 128.55 54.72 61.79 34.69 59.57 24.93 36.33 19.86 -1.03733078028167 4.88e-05 -2.11704552757245 0.000287251112659135 -1.57376704464847 0.00623060443386787 -2.44506278753558 2.66e-05 5.81 7.34 6.64 7.21 7.01
"1393" "Slc7a1" 150.93 143.41 165.55 128.41 248.42 255.09 372.27 176.63 455.49 468.88 524.54 0.839072920806238 4.88e-05 1.63086734465037 1.55e-07 1.67266670619803 6.31e-08 1.83450075676345 7.12e-10 8.59 10 11.2 11.7 11.3
"1394" "Ddx25" 20.19 22.82 20.24 18.52 6.55 5.57 1.36 4.45 18 24.54 0 -2.18919615215201 4.9e-05 -0.183574733803344 1 0.263563608642524 0.721676276710795 NA 0.000626846575630429 6.2 8.91 10.3 10.9 9.44
"1395" "Stox2" 1.15 1.48 1.78 2.36 6.08 6.21 5.63 4.64 2.75 34.74 29.14 1.7365393288238 4.9e-05 0.700275784837025 0.464434267547033 4.3593700151354 5.72e-27 4.10577313848952 2.63e-22 0 0 0 8.26 0
"1396" "Mef2c" 1257.03 1133.43 1226.73 1249.02 853.78 645.75 464.52 467.54 361.14 152.63 122.17 -1.00089858996612 4.91e-05 -1.75216845305538 0.0063492413592696 -2.99468811845308 5.25e-06 -3.31583661440633 4.65e-07 5.43 7.17 8.44 8.06 7.67
"1397" "Gpatch4" 120.32 112.21 109.07 94.31 176.92 206.69 343.93 128.04 395.09 260.91 182.12 0.97287245828294 4.97e-05 1.8581510309335 6.79e-08 1.25952193971514 0.00136094205378051 0.740859064230634 0.0940366771853934 6.38 8.28 10.3 9.94 9.13
"1398" "Rpl36a" 540.99 744.97 364.94 647.14 891.66 1478.89 719.27 1230.09 927.12 1238.13 1275.49 0.910597345978278 4.98e-05 0.690424078565584 0.102838022851817 1.10775889128069 0.00319857965945495 1.15064767812575 0.00149942734639276 5.19 7.46 9.01 9.92 8.17
"1399" "Siva1" 98.86 155.79 68.46 81.61 144.94 221.58 216.63 283.25 422.47 369.36 308.26 1.09810909868842 4.99e-05 2.06192475361535 1.11e-07 1.8681034932421 3.96e-06 1.60722355236997 0.000112219394438843 6.22 7.07 8.55 8.81 7.41
"1400" "Polr2f" 197.46 211.31 156.15 243.77 302.35 377.11 531.77 502.83 428.97 529.82 378.06 1.08375893453406 5.05e-05 1.08528998476867 0.0225686666270041 1.38991553289019 0.00153680306622947 0.903028443823225 0.0663526679474168 9.54 10 8.52 9.29 8.17
"1401" "Aarsd1" 142.27 138.88 174.04 153.61 204.35 256.08 413.74 326.75 412.47 529.2 331.83 0.980099784302253 5.06e-05 1.43832083342572 0.000198382682534598 1.79784470277513 4.35e-07 1.12447596414522 0.00615077967306939 4.89 7.06 8.28 9.39 8.44
"1402" "Cxcr5" 1620.49 1711.42 1842.23 1935.22 1210.86 957.01 392.76 1172.66 56.71 111.3 31.32 -0.929272110370387 5.06e-05 -4.96997272462731 9.41e-14 -3.99719419336234 2.1e-10 -5.82649166830062 9.43e-17 5.53 8.51 8.14 8.38 0
"1403" "Pus1" 137.74 166.88 179.12 159.44 230.97 244.39 390.41 351.38 295.63 456.14 301.32 0.920212523877269 5.07e-05 0.878570133108525 0.0396369250190912 1.50425414319892 2.41e-05 0.906073888544254 0.0275024183839347 5.98 7.35 9.21 9.77 8.88
"1404" "Sema5a" 11.18 10.39 12.3 10.91 6.93 5.95 2.39 2.57 17.29 5.86 2.81 -1.32773891293229 5.07e-05 0.627083340789684 0.261439318928309 -0.933881958430349 0.274192305070924 -1.99421249263167 0.00842670959187715 0 0 6.72 5.82 0
"1405" "Arhgef3" 860.58 758.61 766.09 967.77 544.88 457.86 295.6 489 181.95 270.21 109.68 -0.907659896695452 5.09e-05 -2.20386004017506 5.49e-05 -1.63332102408021 0.00256988855482906 -2.93410161512487 1.37e-07 0 6.81 8.46 9.47 8.6
"1406" "Mfhas1" 110.47 113.33 139.38 101.95 95.29 71.4 33.79 45.88 18.06 36.75 48.21 -0.916865960668284 5.09e-05 -2.68676419601718 1.05e-06 -1.66181783888695 0.00182619873690386 -1.27022965910179 0.0160966329396873 4.97 6.69 5.5 6.31 7.71
"1407" "Dennd4b" 587.32 555.71 715.44 527.85 398.89 342.07 263.82 273.76 231.59 200.62 190.08 -0.900290221089742 5.1e-05 -1.36514265351538 0.0135902411971291 -1.57225017619537 0.00396788699550918 -1.65010887171435 0.00200079720601097 6.2 7.89 9.98 9.72 9.3
"1408" "Raly" 659.2 757.64 587.39 766.36 836.64 953.12 1612.49 1453.31 1153.32 1013.07 809.49 0.809444461326151 5.11e-05 0.735599626100221 0.0575808542930169 0.54854063095435 0.186512805129957 0.224891931090416 0.63533850070518 6.47 6.99 9.3 8.75 8.21
"1409" "Tmpo" 753.38 783.82 820.44 877.03 955.73 1077.68 2042 1850.96 2061.84 1266.25 1502.42 0.873530164194999 5.11e-05 1.35031384662572 0.000146355222005616 0.64694373258851 0.144359599876657 0.893669636744142 0.0223944371932047 0 6.48 9.13 8.69 8.49
"1410" "Xylt1" 230.97 221.76 248.79 198.65 127.73 117.61 134.36 80.54 115.47 91.91 69.75 -0.967811109437075 5.11e-05 -0.962679407789319 0.0997278481676908 -1.29190374137082 0.0194404363493955 -1.6899323627174 0.00150290475083778 0 6.08 8.53 8.54 7.61
"1411" "Zc3h6" 84.28 103.99 88.39 77.35 62.66 46.43 36.78 27.01 72.85 32.09 32.85 -1.0340191365198 5.14e-05 -0.280789236427436 0.870682274559604 -1.4635944190975 0.0127344452705259 -1.42982483816962 0.0131643977765828 6.32 8.69 9.92 10.2 9.43
"1412" "Fcrl1" 1685.96 1512.58 1679.25 1532.79 1205.5 924.76 453.49 821.68 477.69 211.08 53.3 -0.91261791390988 5.14e-05 -1.74630831046084 0.00158779579559678 -2.9245930974511 3.17e-07 -4.91017554799768 1.73e-14 0 7.72 9.51 8.97 7.45
"1413" "Prdx3" 349.43 336.41 358.76 445.97 557.94 518.42 750.2 893.02 527.36 320.59 659.2 0.867519736566623 5.21e-05 0.500995924125466 0.30728585531366 -0.217062798562981 0.853601324272885 0.822924019012829 0.0400847513457822 6.47 7.31 8.72 7.99 8.53
"1414" "Pigv" 194.28 173.82 244.84 192.6 113.76 103.01 78.52 117.47 130.37 89.9 136.48 -0.964653061408343 5.28e-05 -0.627344306349728 0.319414913000304 -1.16356320851256 0.0330637200956679 -0.561266677596075 0.371754669951918 0 8.58 9.4 9.53 8.62
"1415" "Pglyrp1" 163.19 147.33 171.64 124.96 88.59 59.42 16.73 56.7 19.48 29.36 13.75 -1.45506585174536 5.29e-05 -2.96191611729974 0.000690227958125717 -2.37005782653887 0.00456262232700176 -3.4644781760827 9.03e-05 0 0 0 0 0
"1416" "Tdrd7" 134.91 147 152.78 131.07 97.66 79.52 45.45 61.95 40.19 99.7 67.68 -0.991355905590748 5.46e-05 -1.81528169733269 0.00125038656951247 -0.504524770105873 0.488950261218649 -1.06338870627148 0.0643008597833794 6.33 6.88 7.72 8.53 6.8
"1417" "Smc1a" 450.33 381.18 361.63 363.28 443.46 562.95 1126.87 578.08 631.73 617.3 404.12 0.800785255112508 5.53e-05 0.699148566409941 0.0660008195021984 0.665812272296966 0.0830900240729641 0.054624233563134 0.915457691482751 0 7.22 8.94 8.78 7.75
"1418" "Cd40" 733.99 792.69 718.73 615.63 533.39 454.22 183.53 339.45 56.1 88.42 306.98 -0.921427526532833 5.55e-05 -3.67239508696115 1.98e-10 -3.01602312350324 5.6e-08 -1.2203230970216 0.023962596164178 0 7.59 8.32 8.89 8.54
"1419" "Mpeg1" 606.22 803.51 567.14 568.12 507.85 399.37 224.43 208.09 258.61 232.64 3411.55 -0.925706939927952 5.55e-05 -1.29881001969353 0.0258464119404852 -1.45148890806426 0.0110892818574232 2.42276737318194 2.58e-16 0 6.6 5.96 0 8.6
"1420" "Haao" 673.07 677.21 761.79 638.02 460.78 345.01 226.53 399.57 263.02 161.55 260.04 -0.941558166539663 5.57e-05 -1.38623442223035 0.00996922946397565 -2.08942617762285 9.1e-05 -1.40267336896074 0.0073535759832157 5.91 8.5 9.54 9.45 9.66
"1421" "Ciita" 1609.07 1446.8 1853.65 1432.24 1203.59 827.55 476.62 678.04 361.51 269.05 498.01 -0.993227581209793 5.63e-05 -2.1327758202563 0.000908602523278202 -2.55893706866454 8.29e-05 -1.6706366636748 0.00807014101090822 0 8.53 9.82 10.1 10.7
"1422" "Klf6" 334.58 296.26 308.92 378.15 246.24 176.66 116.91 172.2 56.9 60.06 112.94 -0.888282443413564 5.63e-05 -2.53367938938925 1.87e-06 -2.45570356702604 3.64e-06 -1.5446234106019 0.0023786369849827 0 7.1 7.36 6.05 7.28
"1423" "Casp3" 77.1 98.37 90.02 145.41 133.63 133.17 303.45 269.19 182.89 106.75 110.03 1.03063987995045 5.67e-05 0.832188863526835 0.107872116026601 0.0554487393401966 1 0.0991096018840501 0.974223510248059 0 0 7.79 8.13 6.98
"1424" "Ppid" 163.58 131.33 155.43 186.72 238.57 278.6 347.74 353.19 546.35 452.59 412.41 0.935131415413257 5.73e-05 1.77839620364849 1.64e-07 1.50677545280875 3.2e-05 1.37265005946289 0.000172732685207876 6.59 8.15 10.4 10.1 9.58
"1425" "Nfat5" 308.04 215.55 289 161.02 210.66 155.44 93.47 57.24 83.59 97.51 60.85 -0.913710000437629 5.75e-05 -1.54194172020551 0.00725626570351105 -1.31972190101569 0.0241112326329339 -2.00001481807346 0.000315506205942479 0 6.75 8.53 8.53 7.14
"1426" "Fgd3" 621.85 486.97 653.29 509.62 396.5 315.94 223.01 289.47 169.04 132.88 109.12 -0.891103848288418 5.75e-05 -1.74835480012254 0.000848729928292539 -2.0955954940951 7.05e-05 -2.3798039230333 5.55e-06 0 7.57 9.1 8.63 8.51
"1427" "Mylk" 1.7 0.15 0.69 0.79 1.17 0.66 3.11 8.93 89.09 3.27 4.2 2.05837370525234 5.79e-05 6.74166942161566 3.54e-69 1.97376845842682 0.0204066841905226 2.33486715059486 0.00296155331206174 0 0 6.17 0 0
"1428" "Cox6a1" 800.03 1019.6 646.19 971.24 999.84 1339.29 1865.67 1940.64 1375.41 2148.88 1686.14 0.838341271350806 5.8e-05 0.678686703203822 0.0978786142868526 1.32240988379285 0.000110464002801782 0.97254929130788 0.0075914616633887 0 0 7.4 8.1 6.16
"1429" "A130040M12Rik" 37.12 30.4 37.66 32.74 51.92 77.29 68.14 94.19 18.34 52.06 143.1 1.07986215874934 5.8e-05 -0.910766135494044 0.320486435747769 0.594415537315014 0.292757030547036 2.05319199252493 2.79e-08 0 0 0 0 0
"1430" "Pitpnm3" 0 0 0.13 0.27 0.41 0.47 2.05 3.05 2.35 1.17 0.88 3.90207357931074 5.81e-05 4.55458885167764 0.000391086170724492 3.54843662469604 0.0223726413126877 3.13750352374993 0.0555317198517561 0 0 0 0 0
"1431" "Il10rb" 449.24 382.2 454.34 506.94 300.91 232.75 180.68 236.53 104.93 115.29 390.28 -0.91483015635108 5.82e-05 -2.09465105966715 7.57e-05 -1.95881088788865 0.000195035744929536 -0.19956873673425 0.880468853887164 6.28 7.75 8.2 8.43 8.66
"1432" "Rbm8a" 58.64 58.44 57.98 68.45 81.42 104.31 193.69 110.31 200.04 101.07 59.49 1.00800555637167 5.86e-05 1.71630749081077 4.84e-06 0.731373814946111 0.143893802397263 -0.0332619359467987 1 0 7.27 8.78 8.52 7.57
"1433" "Hivep3" 85.16 74.94 84.27 39.01 53.81 47.04 27.12 16.07 87.81 9.61 30.48 -0.976268436681441 5.87e-05 0.309719210258185 0.457179047180386 -2.88205770009797 6.4e-07 -1.2168031333784 0.0347160368554327 0 6.48 7.03 7.44 7.5
"1434" "Mdm1" 64.4 49.66 50.97 58.51 73.1 85.94 138.38 139.09 107.91 80.03 49.39 0.965481696147997 5.92e-05 0.949295556546178 0.0314923622590646 0.51807980557792 0.315757087608007 -0.178242134931914 1 0 0 7.55 7.35 6.73
"1435" "Eif4ebp1" 65.26 112.01 64.58 70.48 95.04 131.15 205.21 243.06 239.67 142.69 200.4 1.11066173409965 5.93e-05 1.61797818498115 0.000227968579002276 0.869813081286077 0.0960263522762916 1.35981135841079 0.00300813004426847 6.39 8.19 9.52 9.4 9.34
"1436" "Inpp4a" 117.02 125.78 144.16 92.57 89.51 75.34 48.61 37.28 23.11 52.54 367.85 -0.93542891038922 5.94e-05 -2.37503190996515 1.65e-05 -1.19013296929915 0.0332824932871045 1.61749651647436 1.88e-07 0 0 5.78 7.04 6.47
"1437" "Acsl5" 424.38 431.74 418.81 534.5 685.2 663.5 895.4 978.77 907.66 590.18 1076.98 0.832810699609439 5.96e-05 1.00468858887914 0.00649020629830523 0.383691640331994 0.434433069034463 1.25145616226121 0.000211910485877367 0 8.27 10.1 9.63 9.65
"1438" "Rad23b" 324.26 370.76 306.25 405.65 504.66 519.46 683.52 773.9 529.95 528.2 479.62 0.818695412983272 5.97e-05 0.591387858388822 0.159192931406628 0.586615909944106 0.163779745745849 0.44742342836557 0.312171587798325 6.48 7.88 9.62 10.2 9.05
"1439" "Rpl41" 2989 3500.7 2096.56 2716.52 3815.15 4806.51 4332.97 6361.96 5287.56 2909.65 5329.75 0.773162777028231 5.97e-05 0.903996376757139 0.00856283441698418 0.0422398702854487 0.879321353304494 0.915462110384375 0.00623835032040276 5.41 9.05 10.4 9.66 9.79
"1440" "Dhx33" 113.36 114.85 119.57 124.6 184.44 197.94 257.57 213.06 213.96 287.01 160.2 0.852614770575188 5.98e-05 0.857393224738238 0.0291849833713708 1.28115312008666 0.000218785983447431 0.439926263688159 0.348843803764854 7.5 8.22 9.3 9.74 8.47
"1441" "Gspt1" 227.26 214.55 210.36 205.6 311.12 305.57 601.39 288.52 386.37 332.87 333.14 0.812633669883188 5.99e-05 0.849392219893306 0.0220372332423763 0.634367993603588 0.112188068004636 0.635537728839934 0.101677406251481 6.79 8.95 10 10.3 9.7
"1442" "Rpl39" 2373.03 2467.6 1406.36 2072.07 4053.08 4500.47 2126.68 3794.37 1823.92 2585.55 2402.77 0.799031052968111 6.02e-05 -0.189378070345741 1 0.314050681919147 0.421211478072845 0.208278033828909 0.57843071248713 5.71 8.25 9.64 9.73 9.04
"1443" "Spef1" 6.4 7.91 13.79 7.05 14.53 21.54 50.33 23.04 54.32 18.16 27.39 1.638543540926 6.05e-05 2.62795879028483 1.37e-06 1.04723951333102 0.191912954871069 1.64012457674548 0.0150655314304064 0 0 7.25 7.15 7.19
"1444" "Cirbp" 404.9 529.68 512.92 526.49 233.62 223.04 270.36 278.29 342.72 106.14 116.46 -0.973474238094792 6.15e-05 -0.526012390976838 0.434713523923609 -2.21707432231548 4.9e-05 -2.08320825229227 9.27e-05 5.41 7.58 10.6 8.66 8.26
"1445" "Canx" 1163.76 1137.02 1121.75 1436.17 1888.92 1929.73 3096.94 2469.47 3120.77 3154.8 4488.72 0.949795612308623 6.15e-05 1.36133167876878 0.000401228205971035 1.37697819166175 0.0003494408734125 1.88573374965759 8.18e-08 6.44 9.04 10.3 10.6 9.86
"1446" "Txnl1" 173.31 181.17 168.83 195.79 262.29 262.03 400.32 378.68 304.03 310.08 286.37 0.857927032886586 6.16e-05 0.758021278157365 0.0676718520967967 0.78644806615743 0.0553880571345245 0.671687954687999 0.107741114770427 6.57 7.45 8.53 8.89 7.85
"1447" "Ccbl2" 33.35 36.69 31.78 36.31 77.73 76.22 79.82 75.4 150.32 51.44 81.28 1.16237364777822 6.16e-05 2.12201028405688 1.09e-07 0.574935859964767 0.342580173016855 1.23494561940899 0.0110268082439054 0 0 8.27 7.47 6.78
"1448" "Nono" 475.75 483.95 444.69 540.55 617.05 715.53 1040.39 1049.28 661.5 712.55 587.47 0.815219504711056 6.17e-05 0.444087411822923 0.335798587684689 0.551337507688792 0.197989635792751 0.272861435581618 0.579647659480199 0 7.23 8.41 8.81 7.77
"1449" "Dars" 556.36 516.93 439.74 578.64 770.75 865.56 979.87 1050.67 846.51 1251.77 882.89 0.809885993408852 6.18e-05 0.694943758737004 0.0757361833213997 1.25931424863096 0.00016067355072458 0.755650350150797 0.0425590507130949 6.64 8.93 10.2 10.7 10.1
"1450" "Metrn" 43.43 42.94 63.5 63.73 56.33 96.68 164.98 169.97 320.23 229.03 226.66 1.19185124222409 6.19e-05 2.58419682267702 9.72e-12 2.1006249382683 5.93e-07 2.08561816578525 5.74e-07 0 0 7.54 7.66 7.47
"1451" "5430427O19Rik" 269.31 199.95 195.44 203.17 168.99 125.26 66.16 89.2 76.4 61.12 471.13 -0.948804831034903 6.21e-05 -1.50583441127606 0.00645172012377008 -1.82776250616342 0.000823113440985826 1.11864624632917 0.000749211522886502 0 6 5.83 7.07 7.74
"1452" "Atp1b3" 383.52 386.38 325.71 434.98 434.57 581.15 943.15 747.71 1190.59 911.8 2064.79 0.822383152220531 6.21e-05 1.63758880298926 1.77e-07 1.25270143525493 0.000243822432361555 2.43190718037384 1.62e-18 6.25 7.2 8.69 9.13 8.17
"1453" "Grap" 1680.89 1475.25 1634.45 1396.99 1171.91 886.37 512.62 746.01 220.94 309.17 665.97 -0.899535405965464 6.21e-05 -2.80764873334714 4.49e-07 -2.32290303228123 2.16e-05 -1.21584617830344 0.0255320553329178 0 6.31 7.01 7.52 7.14
"1454" "Mrpl36" 171.42 267.48 211.69 267.3 315.17 345.09 496.9 620.31 362.26 216.76 385.31 0.953432033916968 6.21e-05 0.658704243856358 0.182459297122049 -0.0822227190896332 1 0.747698357607131 0.104986543285732 7.51 8.73 10.1 9.91 10
"1455" "Gm4987" 587.28 887.53 444.38 1070.36 1139.9 1845.46 833.23 1751.02 986.52 1073.59 1579.54 0.897647969408207 6.22e-05 0.400491864457562 0.428467799998088 0.52251479860213 0.273513336826849 1.07957613204263 0.00379919656853039 0 0 0 0 0
"1456" "Adh5" 481.46 425.4 402.78 500.17 613.57 663.96 958.87 966.8 1041.36 938.44 666.4 0.823675633053131 6.24e-05 1.20263065086767 0.000491437477889312 1.05249816688733 0.0034706664556952 0.558622059582686 0.182142169606467 7.84 9.18 11.1 10.8 10.1
"1457" "Nkg7" 35.66 71.99 49.39 75.23 26.98 20.42 11.21 7.5 34.11 25.96 20.15 -1.81286240784668 6.25e-05 -0.767536167581757 0.585394506236721 -1.16144053919602 0.344856884640218 -1.52695108377983 0.180410799595965 0 0 0 0 0
"1458" "Exosc6" 78.55 106.08 76.42 100.52 110.18 120.95 259.65 250.86 227.57 179.72 168.89 1.03644407696328 6.28e-05 1.33203540303035 0.00236561340381921 0.991475986805831 0.0400643269883227 0.901808928329274 0.0630192474876697 5.04 7.96 9.23 9.7 8.72
"1459" "Psma5" 118.12 152.12 87.98 124.55 196.79 202.91 263.42 287.76 417.11 264.72 290.39 0.977927258261475 6.34e-05 1.78909187272152 8.23e-07 1.13313116896337 0.0072895728401912 1.26665574509726 0.00145462537089868 0 7.31 9.06 9.02 7.66
"1460" "Uty" 206.8 182.77 192.35 0.51 0.7 0.2 124.96 123.22 153.37 0.21 0 -1.22547548394324 6.45e-05 0.0749316432273152 0.701545406125232 -9.43747962504175 2.66e-22 NA 3e-23 0 0 6.65 0 0
"1461" "Exosc7" 287.72 290.25 250.39 233.36 380.8 445.24 608.03 528.45 538.34 593.49 534.88 0.886304012137731 6.61e-05 1.02018618586364 0.00855161019342027 1.160892282102 0.00199296785285915 1.01088382076435 0.00768717643038374 6.96 8.62 10.1 10.3 9.58
"1462" "Ndufb8" 439.09 499.37 361.92 477.09 519.08 650.7 1052.39 1047.25 961.21 809.35 783.18 0.879209511807649 6.61e-05 1.11309835245823 0.00361973263883664 0.865010419746157 0.0353231286874597 0.817590618190212 0.0425833065731917 0 5.46 7.6 7.69 7.41
"1463" "Gadd45gip1" 136.54 159.11 101.89 163.07 222.99 224.98 290.02 316.03 257.28 260.75 261.17 0.910832858240954 6.61e-05 0.876341832650196 0.0369531485895892 0.895669773765758 0.0326399340318503 0.897991708345652 0.0265718176017609 5.55 6.96 8.61 9.12 8.1
"1464" "Filip1l" 1053.38 724.02 882.33 890.47 693.09 493.8 319.58 391.73 332.45 262.1 200.17 -0.903268293912024 6.63e-05 -1.41669101813136 0.0124041439311941 -1.75971104214275 0.00162392831058243 -2.14860262590277 9.14e-05 6.12 7.49 8.04 8.26 7.37
"1465" "Rnf219" 65.36 62.55 62.74 61.3 100.24 114.08 178.49 93.3 184.21 179.69 104.63 0.948145356489917 6.66e-05 1.548213925202 2.05e-05 1.51237266677591 3.62e-05 0.732159110820115 0.0989923639317025 6.69 8.3 9.33 10 8.97
"1466" "Gimap7" 501.66 469.66 445.79 576.28 327.75 317.24 95.18 296.79 83.61 112.05 45.18 -0.942863751907329 6.73e-05 -2.57540468280084 3.71e-06 -2.15300944222805 8.06e-05 -3.46339591523272 2.57e-09 0 6.26 7.26 6.93 0
"1467" "Msh6" 245.96 217.7 213.08 261.17 282.18 317.86 644.73 402.17 475.45 538.39 352.19 0.812266600595831 6.78e-05 1.01984413895868 0.00453182035131856 1.19920212252702 0.000478504321948682 0.586904455005038 0.152261385017317 6.47 7.53 8.9 9.32 8.1
"1468" "Lig4" 57.42 40.1 38.7 41.27 53.53 83.9 145.75 60.25 87.45 120.59 16.92 0.952278326359823 6.79e-05 0.978792545525722 0.0201453354295329 1.44237253208977 0.000128195439667376 -1.39093627016334 0.0494335180065413 5.56 7.28 8.01 8.23 8.16
"1469" "Ppp1r8" 227.27 220.03 198.48 234.96 309.47 312.64 458.18 501.81 422.4 424.55 357.19 0.84505269686683 6.79e-05 0.939893645370463 0.0144970827909615 0.947218283190124 0.0134430901516682 0.697975501568961 0.0857879930965604 6.04 7.57 8.96 9.06 8.45
"1470" "Gramd1a" 627.19 528.81 876.64 649.03 417.66 349.46 290.15 427.75 271.19 330.25 341.76 -0.852649352376603 6.79e-05 -1.30575582762173 0.0104020255000458 -1.0215012469233 0.0468291837854216 -0.972076256257301 0.0551496787418044 0 0 8.9 7.36 8.4
"1471" "Leng9" 149.39 156.9 120.91 142.14 80.59 82.27 30.12 63.33 34.96 31.55 27 -1.15140069556785 6.83e-05 -2.02551337245911 0.00193410315765893 -2.17357855208979 0.000877294628701655 -2.39825915002151 0.000198608084414237 0 7.02 8.66 8.31 8.53
"1472" "Eif2b1" 101.6 122.03 107.28 135.85 155.65 185.78 258.71 293.6 248.86 324.45 192.62 0.937174263151097 6.85e-05 1.09265342883981 0.00821154675040378 1.47531523452648 7.94e-05 0.723076576478056 0.114380505087978 5.25 6.62 8.89 9.51 7.65
"1473" "Trap1" 492.24 479.94 471.2 422.95 652.24 670.32 1108.91 814.21 921.24 1016.12 1055.06 0.798316665229335 6.85e-05 0.981444856418768 0.00558396620188978 1.12286668647395 0.00104292521158595 1.17712094298029 0.000371249347692238 6.39 7.72 9.54 9.9 9.1
"1474" "Gas5" 834.8 888.54 681.96 877.75 1344.29 1542.12 1479.47 1437.78 2106.99 1961.71 2671.66 0.821926281486557 6.89e-05 1.36014674503693 3.97e-05 1.25707506146033 0.000204231375994285 1.70269969771705 3.64e-08 0 8.98 11.1 10.6 10.7
"1475" "Tgfb3" 13.2 13.41 13.71 9.17 6.21 3.37 2.02 1.2 9.26 4.59 7.61 -1.95099323197964 6.93e-05 -0.418052943606767 0.982064463056298 -1.43057098345319 0.267863247507144 -0.701168683363458 0.703111228989462 0 0 0 5.73 6.92
"1476" "Ube2e3" 151.49 150.56 137.41 166.46 181.75 234.61 416.11 316.46 166.88 119.83 113.29 0.923091671210718 7.04e-05 0.139683736635346 0.84046675977977 -0.338138187548898 0.770357534647676 -0.419106804868657 0.661047110582195 0 6.09 6.72 6.89 5.53
"1477" "Smc4" 728.87 551.84 575.11 720.95 802.12 874.63 1685.89 1239.27 1914.37 1159.9 743.63 0.836668999531955 7.1e-05 1.57130592438258 2e-06 0.848436660350438 0.0305451183863077 0.20709310929665 0.696401806787456 0 7.28 9.56 9.29 8.73
"1478" "Rnps1" 120.04 143.55 158.31 203.39 193.09 205.68 371.53 413.76 334.37 226 163.17 0.921144838529356 7.15e-05 1.09691996821141 0.00782412610163244 0.531797327621978 0.33159334385115 0.0618503866185356 1 6.65 8.62 10.3 10.2 9.5
"1479" "Hars" 249.61 270.22 261.99 292.8 355.25 390.71 617.2 564.31 401.31 396 425.37 0.842881811831263 7.15e-05 0.578962417582626 0.196360961871629 0.559745741680743 0.215901074101834 0.662963599546513 0.112605892864097 0 7.01 8.36 8.63 8.28
"1480" "Calm3" 549.83 671.3 535.05 820.18 709.16 821.4 1366.57 1626.27 1014.07 845.76 749.92 0.812073379535777 7.25e-05 0.654823044998208 0.120966300619868 0.392986036967017 0.426838057188748 0.219474406804471 0.703111228989462 7.46 8.76 9.9 9.86 9.63
"1481" "Tsfm" 110.56 119.44 131.57 135.22 158.03 212.79 303.22 328.36 225.82 151.57 179.5 1.0127502811489 7.35e-05 0.862537132152927 0.0816244053942969 0.287348098004744 0.671236249595256 0.531347710537456 0.343304676857596 6.6 7.95 8.55 8.64 8.62
"1482" "Col25a1" 0 0.37 0.27 0.27 1.4 2.87 7.7 1.04 1.11 6.15 0 3.8376106065191 7.36e-05 2.28662122615141 0.29667313935934 4.75664796002791 4.12e-05 NA 1 0 0 0 0 0
"1483" "Tnf" 74.66 96.7 92.1 131.48 67.23 41.04 15.49 48.15 99.86 19.22 58.58 -1.19998002430572 7.41e-05 0.0163453186869169 1 -2.36095325186943 0.000781036897227479 -0.753153394763809 0.320320879824651 0 7.24 8.71 8.46 8.33
"1484" "Rictor" 303 281.51 309.18 279.55 203.47 164.11 143.65 123.07 216.08 163.42 160.71 -0.887260916460644 7.42e-05 -0.44086071367191 0.565267078966018 -0.843841701493503 0.155896304746911 -0.867966556740081 0.132273961486726 0 0 7.83 7.61 6.97
"1485" "Acy1" 81.04 110.17 91.66 102.21 160.33 179.81 225.62 215.38 269.63 297.33 334.46 1.02042294344502 7.46e-05 1.48582282941695 0.000234253080347918 1.62690684016903 3.31e-05 1.79667548551097 1.32e-06 5.61 8.87 9.97 9.88 9.47
"1486" "Shfm1" 1328.53 1486.3 799.6 1081.4 1660.62 2155.42 1988.13 2281.85 1777.92 2070.24 2009.12 0.784049591515258 7.49e-05 0.598810229077101 0.109246491261554 0.818417846551364 0.0210241255096681 0.775183554950005 0.0261011194997494 0 0 7.63 7.65 7.36
"1487" "Auts2" 0.4 0 0 0.15 0.45 1.2 4.14 1.01 0 1.28 0.77 3.62803122261304 7.52e-05 NA 1 3.21864028647534 0.0215858898526657 2.48542682717024 0.101677406251481 0 0 0 0 0
"1488" "Ms4a4b" 144.04 137.67 94.33 141.63 79.2 74.23 19.32 45.77 90.1 304.66 132.09 -1.24426738544279 7.57e-05 -0.522433702439879 0.629308990491546 1.23516738180619 0.00222238908863194 0.0294885365172697 0.9600869688439 0 0 0 0 0
"1489" "Rfc5" 149.43 177.43 121.72 147.57 183.35 220.11 351.73 339.87 370.78 522.71 298.98 0.877262634937971 7.62e-05 1.31488804720511 0.000306269124255632 1.81033538046404 3.99e-08 1.00437360046206 0.00879391037823866 5.74 7.46 8.46 9.37 7.81
"1490" "Psmd1" 372.11 360.59 320.08 398.84 462.66 536.31 867.69 663.23 691.38 732.88 513.58 0.801410818583283 7.66e-05 0.929886936435252 0.010894926608784 1.01398506030829 0.00450327068282807 0.50099708766424 0.233300971413102 5.82 7.3 8.56 9.22 8.2
"1491" "Dnajb13" 100.4 109.72 74.16 104.7 165.54 190.63 218 226.98 186.72 153.56 141.28 1.04237640619883 7.71e-05 0.941180487405529 0.05043173981867 0.65910648654513 0.211434925348401 0.538861269346647 0.318431449579836 0 0 0 0 0
"1492" "Zfp677" 85.45 79.98 64.04 66.66 38.92 25.65 26.61 34.89 17.8 38.53 27.33 -1.23200564440711 7.72e-05 -2.05628150651723 0.0024428929610974 -0.942176561711442 0.217443976837259 -1.43767328784779 0.0319802763569676 0 0 6.06 5.95 0
"1493" "1110012D08Rik" 35.18 30.18 39.74 31.13 15.27 8.44 12.36 10.15 6.2 4.28 12.53 -1.55945527767786 7.75e-05 -2.45763241687125 0.00779158303990978 -2.99228983574434 0.00154107735035064 -1.44258612282363 0.110815420564154 0 0 0 0 0
"1494" "Stk17b" 3323.59 2856.62 2710.05 3480.52 2225.82 1667.75 676.93 1494.25 827.25 766.25 460.87 -1.02841638653092 7.93e-05 -1.90246927094448 0.00564210662873271 -2.01297748867888 0.00326654799031708 -2.74643279794369 5.53e-05 5.27 6.4 7.28 8.1 7.31
"1495" "Slc39a6" 75.3 75.69 79.53 84.26 119.85 133.9 214.28 122.15 227.05 206.04 285.16 0.906811151544208 7.94e-05 1.52866615670921 1.34e-05 1.3885805651208 0.00013620772388376 1.85742774601753 9.7e-09 7.48 8.18 10.1 10.3 9.77
"1496" "Snrpa" 127.34 149.52 118.88 134.33 147.22 216.47 359.81 296.54 314.24 244.79 193.61 0.944370930529086 8.03e-05 1.24568394304339 0.00183096824726491 0.88536173148402 0.0469770877997288 0.546970578338099 0.261120678133999 6.56 9.32 10.3 10.5 9.6
"1497" "Spo11" 19.01 20.88 17.16 16.01 3.2 2.42 5.76 3.55 9.84 4.53 5.46 -2.29086758822748 8.04e-05 -0.892351533022779 0.661985149975265 -2.01149879831578 0.156811574517343 -1.74210889744217 0.229100187564036 0 7.12 8.21 0 7.69
"1498" "Suclg2" 135.69 128.92 100.23 145.08 198.14 251.76 244.33 253.54 230.14 150.62 256.22 0.894266071479175 8.07e-05 0.852240831981699 0.0402062232096085 0.240642426027504 0.643057254839145 1.00711216961919 0.00908408853747229 6.9 8.27 9.65 9.67 9.13
"1499" "Sec14l5" 0 1.02 1.91 0 0.39 2.22 5.53 14.78 0 0 0 2.96763447433466 8.09e-05 NA 0.982064463056298 NA 0.971740805497965 NA 0.975568868467099 0 7.58 7.83 8.37 8.61
"1500" "2610024G14Rik" 73.96 66.9 82.14 93.92 123.04 139.21 251.35 118.24 203.66 260 154.47 0.995440565572099 8.29e-05 1.36204394715088 0.000790911277443232 1.71439291591493 4.21e-06 0.963207968630364 0.0310410779866585 0 0 0 0 0
"1501" "Cyb561d1" 138.93 100.03 136.47 137.48 79.39 62.63 74.14 49.94 73.08 57.52 50.26 -0.946737188874321 8.31e-05 -0.811157160156415 0.176018316635063 -1.15657011834461 0.0379037603373805 -1.35122312290325 0.0121264141342898 0 6.1 8.49 8.07 7.32
"1502" "Slc22a12" 8.04 6.89 4.36 10.23 21.1 23.49 17.2 31.57 2.68 17.75 3.64 1.66111183964695 8.49e-05 -1.46138781560262 0.497196929914188 1.26612630321901 0.0980674541107693 -1.0196823658617 0.698668674694896 0 0 6.59 8.59 7.79
"1503" "Mcoln2" 256.18 261.36 253.01 259.1 468.3 436.37 483.31 440.65 583.24 314.13 622.28 0.828609175722352 8.54e-05 1.18000755374332 0.000698763011747855 0.287279616827054 0.562061900146962 1.27348176612992 0.000139075334006623 0 10 11.8 11.5 11
"1504" "Xdh" 35.82 43.22 29.96 35.36 21.92 11.76 7.12 18.31 47.05 42.38 48.98 -1.28819692264634 8.59e-05 0.382595579718666 0.458524975430443 0.231784444474937 0.650354084194565 0.440593630666745 0.376381620898935 0 0 7.14 0 5.85
"1505" "Chchd1" 373.56 333.22 287.93 360.53 517.73 582.43 748.18 737.72 575.52 1245.34 566.42 0.932207386310072 8.6e-05 0.764389608045982 0.0929192721848709 1.87799131586002 4.05e-08 0.741395750603073 0.0938375499368066 0 6.14 8.75 9.29 8.02
"1506" "Rpn1" 414.27 468.64 400.33 581.46 682.18 721.62 981.6 916.38 1098.81 1043.5 1808.64 0.824300452728862 8.6e-05 1.2369984022934 0.000372579829021966 1.16248705759168 0.00109979036834607 1.95596173299106 8.94e-11 0 7.79 9.24 9.2 8.9
"1507" "Colq" 20.03 14.75 37.45 23.45 10.96 5.49 6.43 9.56 28.5 13.32 18.57 -1.56044356998083 8.62e-05 0.252744529741361 0.81503585700067 -0.844623307126843 0.394873980101603 -0.365243574262684 0.812161784746098 0 0 0 0 0
"1508" "Fam92a" 43.73 69.36 42.39 44.12 83.41 109.55 132.34 118.01 190.05 135.72 92.66 1.15120418590129 8.62e-05 1.92926730452471 5.83e-06 1.44352161448635 0.00233664082751524 0.892906866808648 0.0923660709475087 0 0 5.89 6.18 0
"1509" "Rnase6" 1098.57 1194.39 983.09 1235.7 665.72 590.95 351.11 785.54 120.46 180.48 1227.02 -0.914673822955233 8.62e-05 -3.22706105981556 7.29e-09 -2.64377625099976 1.01e-06 0.121471635659017 0.838045876472184 0 0 5.67 8.25 7.45
"1510" "B020018G12Rik" 55.85 72.14 54.56 82.63 75.66 130.76 224.33 140.43 167.24 114.32 66.32 1.10697349313367 8.69e-05 1.33494797767796 0.00445028709562835 0.786105850729644 0.156272778173769 0.000543941129577714 1 0 0 0 0 0
"1511" "BC057079" 64.82 74.39 68.81 63.16 130.11 111.52 152.3 98.99 159.77 197.61 271.75 0.862102737766356 8.81e-05 1.2367457578529 0.000534229310728712 1.54340517484644 3.87e-06 2.00302925414118 3.95e-11 0 0 0 0 0
"1512" "Rhof" 421.64 457.58 460.09 426.87 286.21 264.84 121.23 270.57 70.89 127.01 34.95 -0.905532209688442 8.82e-05 -2.63890644229445 1.18e-06 -1.79761838687998 0.000685355247345241 -3.65919611672666 1.65e-10 5.74 6.17 7.86 8.18 7.44
"1513" "Kat2a" 146.24 137.54 201.99 163.73 225.52 247.13 408.25 304.69 304.6 406.75 232.27 0.868203753438833 8.88e-05 0.907586416152049 0.0272608301230295 1.32481282022465 0.000222981425490238 0.516473301972555 0.293536835379096 6.09 7.68 9.18 10.1 8.83
"1514" "Adam6b" 40.96 23.67 31.04 24.59 14.49 15.99 5.02 4.77 2.65 43.54 42.77 -1.57837948625031 8.9e-05 -3.50402069374551 0.00112924587380892 0.534256448992139 0.391314446624927 0.508514248680266 0.404708928444141 0 0 0 0 0
"1515" "Ftsj1" 47.61 38.01 32.04 38.56 52.58 63.31 93.6 98.49 85.9 85.95 53.98 0.979257500650562 9.06e-05 1.13715087074466 0.00828654621785507 1.13799037908426 0.00870021463042724 0.466917716185687 0.371754669951918 0 6.33 7.75 8.03 6.96
"1516" "Adsl" 254.31 289.96 271.2 301.36 420.42 440.31 569.84 556.62 504.25 528.86 564.29 0.831320218230395 9.09e-05 0.852801483467318 0.0300738788287898 0.921548166784797 0.0166962027371884 1.0150990878845 0.00528295431167818 5.62 7.38 9.11 9.2 8.86
"1517" "Lass6" 50.41 45.59 49.04 57.74 29.54 22.18 24.36 15.51 15.03 30.81 198.61 -1.1466533723292 9.11e-05 -1.75399845334077 0.00846376588808269 -0.718444780217784 0.351787172266374 1.97002289658461 6.07e-09 0 0 0 0 0
"1518" "Polr1c" 268.44 290.13 244.1 266.27 427.98 403.89 547.19 554.88 449.96 389.03 548.78 0.85536215993836 9.23e-05 0.751687784974412 0.0712711994273467 0.541772441540896 0.228952059680558 1.03811893299396 0.00520532575012628 0 6.21 8.35 8.1 7.56
"1519" "H2-Ob" 4072.73 3126.44 4345.11 4390.28 2565.27 2063.07 1128.12 2198.57 855.31 677.78 172.24 -1.00221990624952 9.25e-05 -2.21956796478721 0.00106726381105584 -2.55519830613285 0.00018594607986994 -4.53159514777556 1.43e-09 0 6.7 8.69 9.04 6.97
"1520" "Parp3" 248.66 362.44 252.81 263.27 190.59 165.5 71.55 155.13 107.16 89.45 123.11 -0.951719401718814 9.25e-05 -1.39487952727371 0.0130709372462522 -1.65549262617682 0.00267086855647087 -1.19469805950661 0.0322567994851183 7.37 9.01 9.95 9.94 9.13
"1521" "Rnf167" 549.3 599.55 1103.06 1223.19 472.04 334.96 465.57 732.05 409.04 324.38 340.92 -0.793725711363413 9.25e-05 -1.08674065739272 0.0205060564638337 -1.42129771715724 0.00241544941398159 -1.34954935116897 0.00326135275730105 5.62 6.79 8.96 9.09 8.12
"1522" "Gm10857" 3.02 3.42 2.87 8.88 7.85 11.5 25 19.14 34.93 41.32 12.97 1.80338383493464 9.27e-05 2.94132109974338 7.75e-07 3.18369471121357 1.83e-08 1.51203293660021 0.0659030810352745 0 0 0 0 0
"1523" "Gad1" 15.7 12.94 37.01 18.11 8.77 9.31 4.47 7.34 0 0.69 0 -1.48659854525271 9.29e-05 NA 1.66e-06 -4.92352127015264 3.1e-05 NA 1.13e-06 0 0 0 5.53 0
"1524" "Psmb7" 604.61 606.44 505.53 662.3 698.07 871.59 1305.31 1298.84 1012.88 1125.82 1007.17 0.811082429265727 9.3e-05 0.76818076390777 0.0527619069601608 0.92069368435205 0.0147070037497117 0.760024717647906 0.0496601540451176 0 0 7.19 7.55 6.54
"1525" "Nedd8" 541.78 557.51 472.82 538.92 710.62 646.32 1256.86 1201.73 697.01 896.85 439.31 0.853936388898595 9.4e-05 0.401304178621145 0.415588509978975 0.764991535657609 0.0692695902720579 -0.264635836134442 0.890473336643479 5.48 8.6 9.41 9.97 8.91
"1526" "Itgb3" 94.69 105.2 96.81 80.22 54.1 45.06 36.94 52.51 46.32 39.02 108.74 -0.998852179873506 9.42e-05 -1.02455119038388 0.0906435043943509 -1.27197266576409 0.0285811917188505 0.206624384424981 0.658612585070042 6.68 8.51 8.94 9.6 8.94
"1527" "Btg1" 1754.55 1969.98 1167.38 1327.86 1229.67 925.27 355.11 525.08 391.48 244.01 101.88 -1.03510292113401 9.47e-05 -1.98985072227498 0.0034386990419783 -2.6718490535901 8.29e-05 -3.93191846228787 1.93e-08 5.21 7.31 8.54 7.56 7.25
"1528" "Abca6" 10.38 9.35 7.32 15.23 3.49 5.74 2.18 2.07 13.81 1.48 6.93 -1.64915488020082 9.61e-05 0.385737942875368 0.58931710542903 -2.83630629575373 0.00839689204238308 -0.60904811924547 0.685729056739125 0 0 0 0 6.07
"1529" "B4galnt1" 943.18 903.65 1318.49 1202.5 757.99 573.58 404.42 723.2 502.44 459.67 854.56 -0.828730199706452 9.61e-05 -1.1198901742894 0.0320348312294968 -1.24824298532827 0.015354064871843 -0.353659708858724 0.575581687790799 6.04 8 9.27 9.02 9.79
"1530" "4930402H24Rik" 82.22 65.62 84.16 56.22 41.73 42.54 24.4 32.43 17.29 33.88 48.93 -1.03045246173324 9.69e-05 -2.05916067557558 0.000563117818794156 -1.08866466988566 0.0819242631944698 -0.558379261784822 0.461086541924684 0 5.39 7.08 7.13 6.11
"1531" "Ckap5" 326.93 277.12 273.64 327.1 382.2 442.82 816.61 467.89 599.66 538.82 490 0.808133065055834 9.71e-05 0.993434946411359 0.00648400698991917 0.839093606561062 0.02860967074057 0.702071953828133 0.0717468398171492 0 5.03 7.86 8.05 6.97
"1532" "Fam162a" 175.01 208.78 174.24 206.6 292.22 331.69 495.28 435.23 463.31 398.88 381.47 1.02354265859348 9.72e-05 1.27721601664238 0.00350112546971256 1.061192983006 0.0224663849316204 0.996807798511562 0.030267361289176 7.24 7.85 9.35 9.38 8.94
"1533" "Ipo11" 148.39 149.51 141.7 148.01 216.67 207.41 336.37 270.35 336.49 154.88 268.64 0.810833589180044 9.78e-05 1.19570468262856 0.000556951464178347 0.0762919097076568 0.92597283298669 0.870815187370092 0.0189261618608863 4.91 6.89 8.69 8.61 7.51
"1534" "Tra2a" 473.81 417.51 434.91 403.93 645.56 728.22 902.21 741.12 641.13 632.64 621.59 0.802261836137623 9.81e-05 0.567783362413362 0.171464846672078 0.548551221157029 0.18811645595671 0.523129739156522 0.203835348611924 5.64 7.23 8.83 9.25 8.25
"1535" "Gimap6" 3911.68 3703.94 2939.21 3891.02 2493.33 2087.35 818.57 2046.01 809.32 647.11 233.75 -0.956260959251088 9.85e-05 -2.15780103703313 0.000424326679216905 -2.48050031314421 5.89e-05 -3.94954491996852 1.38e-09 0 0 7.66 7.54 6.99
"1536" "Itpkb" 422.23 350.05 437.83 366.84 261.09 252.83 198.52 159.62 202.34 257.86 115.39 -0.85463761293826 9.93e-05 -0.962283462299433 0.0871702667421982 -0.612477017138573 0.333578635662716 -1.77254681086772 0.000614838821581035 0 6.78 8.63 8.45 7.54
"1537" "Cyp2r1" 155.36 113.93 118.6 93.28 83.25 72.15 28.98 30.01 5.94 15.04 6.48 -1.1663090817833 0.000100234459969339 -4.33993995487773 5.94e-08 -2.99967022400085 3.07e-05 -4.21440907279387 6.32e-08 6.04 7.88 8.2 8.63 7.63
"1538" "Gm8096" 2.91 2.88 0 4.81 9.36 15.63 14.64 13.47 22.52 12.72 23.97 2.32464759624095 0.000100491892776893 3.08714256262967 0.000116987592506789 2.26303440583379 0.0143929748160415 3.17716564419857 3.95e-05 0 0 0 0 0
"1539" "Itgav" 182.89 203.02 198.34 206.97 144.62 122.08 96.6 74.81 116.92 93.39 85.77 -0.85278574915641 0.000100588739754732 -0.758557159909352 0.195812695545756 -1.08273891152507 0.044622933451248 -1.20553386836315 0.0202935476018691 5.05 6.45 8.11 7.66 7.23
"1540" "Chic1" 8.65 11.46 7.47 6.71 4.45 2.94 2.16 1.19 1.14 6.15 2.37 -1.67479391095022 0.000100676591460886 -2.91068217477089 0.00717740316207234 -0.479129588709032 0.85567196650645 -1.85482894003738 0.0728360282170679 0 0 0 0 0
"1541" "P4hb" 744.87 800.49 792.79 1019.14 1237.15 1258.72 1852.47 1640.34 2022.88 2051.12 4492.68 0.834940883947714 0.000100676591460886 1.26911357854644 0.000323695332966404 1.2891147373637 0.000260071326150163 2.42027914546809 2.2e-16 7.49 8.86 9.98 10.4 9.41
"1542" "Tk2" 318.6 365.28 392.6 353.09 208.34 200.16 159.21 199.55 108.01 90.72 59 -0.897793815240088 0.000100890629235382 -1.72634447018485 0.00106088494567104 -1.97801681387096 0.00018284504867272 -2.59872249967662 1.14e-06 0 8.08 9.09 9.49 7.91
"1543" "Usp14" 139.42 115.87 123.02 121.58 185.44 196.85 301.51 201.68 251.52 203.34 191.26 0.824849054680946 0.000100890629235382 1.00906245564913 0.00625159444942603 0.702283375595676 0.0848829387860071 0.613924513807993 0.133948144993102 6.76 7.27 8.79 9.27 8.52
"1544" "Timm9" 124.47 146.51 131.35 147.01 261.04 274.92 272.85 297.81 364.45 486.23 380.11 1.01038865290174 0.000100901899779553 1.40802155540718 0.000647299021366579 1.8239395642206 1.03e-06 1.46871763535518 0.000217605204428147 7.7 9.3 10.4 11.1 9.91
"1545" "Gab3" 85.8 66.29 64.21 49.62 38.27 29.77 15.01 23.58 5.1 27.69 18.16 -1.31837889450661 0.000101782623034499 -3.70435122991149 9.12e-06 -1.26355532840341 0.117469802996746 -1.87215617947943 0.012452646054966 0 0 0 5.95 0
"1546" "Mycl1" 6.57 12.98 17.36 13.44 4.44 5.34 1.96 3.1 1.38 2.22 39.16 -1.76250068627334 0.00010280644555978 -3.18925160611598 0.0101002952080406 -2.50336019654404 0.0302436350638861 1.63738898670955 0.00232934824236976 0 0 0 0 0
"1547" "Rps17" 1014.29 1360.7 854.63 1961.73 1681.61 2576.38 1637.93 3405.49 2543.77 2278.08 2545.31 0.841339673543392 0.000102820418651934 0.970858475109789 0.0123158084453652 0.811708654196956 0.0499173074637345 0.971731619344419 0.0102127317295125 5.94 7.12 10.5 9.74 9.33
"1548" "Gramd1b" 81.99 91.68 91 83.48 49.38 48.3 29.16 36.11 40.28 87.64 195.86 -1.09527967132707 0.000103208167043913 -1.11157343494622 0.099926975495113 0.00995236603722124 1 1.17011376626936 0.00237602998206056 0 0 6.82 9.58 8.67
"1549" "Psma6" 857.82 844.58 650.64 877.53 1008.52 1220.72 1710.58 1617.7 1199.7 1664.7 937.8 0.782652499427668 0.000103496379949555 0.570884951281593 0.160766025425056 1.0434734731226 0.00289615219633949 0.215563448471128 0.63674405822837 0 6.91 8.41 8.65 6.92
"1550" "Dlg3" 15.59 23 18.24 20.59 6.53 7.83 6.94 7.26 1.44 4.41 2.56 -1.43871032826321 0.000103806188362585 -3.74856559085 6.84e-05 -2.13385574673479 0.0112831654721734 -2.91849059229231 0.000651977963242155 0 0 0 0 0
"1551" "Rtn1" 6.53 6.8 9.14 9.08 2.86 1.48 1.3 1.35 3.09 3.16 7.33 -2.17427564449447 0.000103849682709204 -1.35196126196554 0.382103795945886 -1.31964354169281 0.389809885298106 -0.105754901736099 1 0 0 0 0 0
"1552" "Gpr137c" 18.78 27.86 28.11 12.69 10.47 10.19 3.73 2.49 1.48 4.09 1.92 -1.70176026289314 0.000103859715817978 -3.88462432004295 0.00180624582652091 -2.41812065273016 0.0287965367757677 -3.50911518495075 0.00256221373631173 5.8 7.54 8.59 9.55 8.3
"1553" "Nup133" 95.26 103.03 97.09 115.08 128.74 135.05 262.77 197.57 217.77 225.89 137.61 0.819007085650403 0.000103985804413665 1.0855635861866 0.00296258931568796 1.13837876913916 0.00161948706434787 0.423343677397736 0.371754669951918 0 7.28 8.7 8.78 7.94
"1554" "Rpl3" 1312.71 1691.98 1171.57 2164.28 2096.16 2849.66 2820.42 3494.91 2586.91 1736.16 3715.23 0.828676544781638 0.000104306253151912 0.7066241482336 0.0925688164266349 0.131294194419832 0.877164086918571 1.22884581241805 0.000405016994980414 0 8.6 10.7 10 10.1
"1555" "Hmgcll1" 19.72 19.49 12.09 11.28 15.93 34.44 52.54 35.6 3.34 106.33 35.61 1.1462165745296 0.000105748219480304 -2.22778165076687 0.0485685512834922 2.76477513331877 1.01e-13 1.18658077712214 0.0161952672780106 0 0 0 8.25 6.96
"1556" "Gm6531" 1.51 6.48 2.23 4.07 4.96 13.42 21.55 14.41 26.66 15.29 15.62 1.92700864912616 0.000105834748550076 2.89967086399316 1.13e-05 2.09758249026499 0.00610366135638472 2.12838853704616 0.00428855393099205 0 0 0 0 0
"1557" "Psma4" 443.07 541.62 326.46 545.93 583.82 774.38 847.69 1045.12 740.39 886.91 789.03 0.807852028138849 0.000106635141718008 0.673321349264412 0.0968888631357856 0.933823652694433 0.0122524443496223 0.765116094054456 0.045019529164608 5.85 8.01 8.73 9.05 8.15
"1558" "Cxcr3" 18.03 22.28 23.86 54.02 18.19 10.32 3.31 5.9 10.5 20.73 37.84 -1.64770639380841 0.00010682196986695 -1.49264674193002 0.170690382336895 -0.511315953374089 0.721694699985812 0.356876018855891 0.707253872307038 0 0 0 0 7.46
"1559" "Zkscan16" 12.11 4.7 6.07 8.25 16.03 19.68 37.52 16.24 53.94 86.68 1.26 1.52309843957403 0.000107007430520464 2.79304994476642 2.05e-08 3.47739357662449 1.72e-15 -2.62680993796926 0.127102022005501 0 7.23 7.65 9.04 6.44
"1560" "Snrpg" 414.95 480.19 288.35 378.93 625.67 913.47 680.41 815.27 724.06 1017.63 643.16 0.957828628583895 0.000107857489192151 0.890398835932141 0.0425841765233376 1.38143078549342 0.000415292154857465 0.719467267101119 0.107774712898531 0 8.04 9.34 9.5 8.8
"1561" "Scarna8" 419.72 404.88 22.69 22.54 1526.06 677.05 38.63 22.96 347.42 451.9 386.76 1.3805145795795 0.000107870036546579 0.675947340879194 0.218828555870244 1.0552700895212 0.0536049286886527 0.830705126743537 0.119977710185681 0 0 0 0 0
"1562" "Gpd1l" 713.57 699.56 603.45 669.91 752 1030.47 1389.29 1534.86 775.93 661.79 521.3 0.808968910493379 0.000107891188922363 0.208275943769155 0.662153840851265 -0.0212770708332708 1 -0.365536702822678 0.703183161823014 7.37 9.16 10.5 10.3 9.7
"1563" "St6gal1" 762.83 643.95 878.75 975.6 564.6 428.63 416.52 414.01 417.96 231.95 266.51 -0.838456064363795 0.00010803600869663 -0.96393516921073 0.0835449596759456 -1.81348620178141 0.000726202727039345 -1.613110381102 0.00210839219662048 0 7.01 8.53 9.3 8.59
"1564" "Ccdc157" 24.85 26.2 31 28.22 13.66 13.29 5.9 13.67 16.38 17.25 9.54 -1.24511734350982 0.000109548967493198 -0.751033083342034 0.382103795945886 -0.676372078430149 0.428781999904839 -1.53090726897753 0.0319946992254674 0 6.7 8.48 9.13 8.35
"1565" "Snx9" 716.96 701.27 702.61 697.13 474.32 394.75 308.79 358.81 301.29 236.14 207.96 -0.874848873433118 0.000110469187073275 -1.22543155794764 0.0235825799807063 -1.57694190586187 0.00278878497657006 -1.76027828740899 0.000646971743199442 0 0 0 0 0
"1566" "Khsrp" 295.12 269.4 337.59 258.46 360.01 411.24 834.51 411.95 612.97 406.7 240.24 0.797885292956512 0.000110637301994842 1.07905483059128 0.00234819215204601 0.487203354180546 0.280886816233763 -0.2722852566118 0.78154075349229 0 6.75 8.35 8.49 7.24
"1567" "Kmo" 1331.29 1232.16 1144.11 1344.18 948.49 774.64 339.39 687.69 125.98 189.9 2462.2 -0.877238605380987 0.000110927495379978 -3.32551376780299 1.17e-08 -2.73346857865147 1.4e-06 0.963167564808513 0.0096663269588104 0 0 0 6.61 8.02
"1568" "Zc3h12c" 110.1 118.02 91.8 87.44 99.26 77.14 20.07 20.21 7.27 17.57 727.15 -0.910738328430305 0.000111238229835182 -3.80820514998176 5.25e-10 -2.53511822789298 9.11e-06 2.8359486765662 2.44e-27 0 0 0 0 7.59
"1569" "Arhgap6" 17.98 16.26 17.98 18.02 7.96 6.59 4.96 6.64 1.75 4.84 5.31 -1.42548189840105 0.000112464751915483 -3.32686601770303 0.000249566586513438 -1.85921389226076 0.0285964228235414 -1.7255090787312 0.0352930622690045 0 0 0 0 0
"1570" "Ddx3y" 442.84 334.63 401.14 0 0.59 0 246.73 286.87 220.88 0.48 0.5 -1.14166153781565 0.000112611841262204 -0.415751713851058 0.812735219513988 -9.26176438571797 2.74e-25 -9.2028706966644 4.27e-25 0 0 6.86 0 0
"1571" "Zfp521" 0.39 0.58 0.73 1.73 0.74 1.18 9.76 4.41 2.35 2.53 51.37 2.22988384455063 0.000112611841262204 1.45445218039219 0.205982651600504 1.5609288085215 0.159900839647941 5.90464559217415 5.15e-37 0 0 0 0 8.5
"1572" "Mrpl15" 91.11 95.77 93.41 111.78 141.58 177.74 199 192.92 177.58 299.73 220.51 0.859225207883806 0.000113406568048557 0.857357851426221 0.037007072801714 1.61255223508654 1.33e-06 1.16973282719022 0.00128879468240006 6.63 7.86 9 9.63 8.89
"1573" "Prmt7" 199.9 223.62 221.29 215.12 318.75 301.97 445.22 458.9 389.43 443.58 367.57 0.826366738527001 0.000113592926715299 0.857144800945471 0.0310531657450137 1.04497509280192 0.00525365760829491 0.77379979646711 0.0522492973254438 6.62 8.66 10.4 10.4 9.66
"1574" "Rpl18" 1444.59 1978.92 1286.51 2246.74 2345.13 3155.46 2416.61 4163.05 2722.25 2167.84 3234.85 0.796162856051429 0.000113678518334368 0.646384013686422 0.117725503710604 0.317842730514666 0.518014635933367 0.895283265707927 0.0143595616184191 0 0 7.35 7.51 7.11
"1575" "1300001I01Rik" 187.27 237.15 262.94 238.23 296.8 317.47 621.35 388.94 667.75 640.75 426.33 0.811603844937869 0.000113703369022516 1.5289347930921 2.51e-06 1.46938829574857 8.83e-06 0.881597300705973 0.0203500152800671 0 0 0 0 0
"1576" "Elk3" 177.46 156.28 178.29 164.14 116.8 92.88 81.46 69.91 154.35 57.99 34.27 -0.905187366286685 0.000115390573569892 -0.131180525867213 1 -1.54350996543731 0.0042153338950167 -2.30236791185053 1.73e-05 0 6.93 8.37 7.99 6.26
"1577" "Arap2" 459.92 456.7 372.94 419.49 345.05 288.35 131.87 162.95 106.95 106.84 60.4 -0.88065591699378 0.000115411167019722 -1.99818621753002 0.000374399878902843 -1.99967081894732 0.000376150198119456 -2.82250224536999 6.18e-07 5.42 5.95 6.65 5.33 0
"1578" "Nde1" 255.15 206.74 259.24 256.76 325.66 343.73 550.28 512.64 422.17 380.69 261.53 0.824953031197514 0.000115684497427756 0.788151872630156 0.0548875250903674 0.638944483813603 0.145667603228414 0.0973042571883676 0.932950814790091 0 6.69 8.52 8.53 7.97
"1579" "Plekho1" 753.43 689.54 746.41 830.94 418 385.84 345.71 483.35 406.65 117.8 247.31 -0.887264967903844 0.000115684497427756 -0.892841890791226 0.110269577518142 -2.68028996551963 6.56e-07 -1.6103089282892 0.00161630456819684 0 6.52 8.82 6.94 7.62
"1580" "4921517L17Rik" 59.08 58.42 58.89 45.04 32.12 29.56 11.9 15.12 14.31 16.88 29.45 -1.31984468637021 0.000115735560031148 -1.95175511883197 0.0154804678997984 -1.71346388685145 0.0339446744057282 -0.910511156840814 0.31852459211435 0 0 0 0 0
"1581" "Coro1c" 171.56 204.05 156.85 197.36 210.43 255.46 432.01 367.47 259.68 341.1 224.78 0.793946705046772 0.000116034744030621 0.509194217894355 0.246204372239831 0.90265406784715 0.0161953195141385 0.300972989093326 0.519765838181182 5.21 6.2 8.78 9.23 8.66
"1582" "Cd4" 35.91 38.21 49.59 73.61 36.62 29.17 6.14 19.92 134.79 145.01 9468.21 -1.10318556599578 0.000116112501685827 1.4501762752501 0.000651851887567233 1.55561520057414 0.00016233931794591 7.58448260709942 1.16e-179 0 0 0 0 9.44
"1583" "Ndufv2" 320.05 327.81 278.23 364.32 454.56 485.65 610 730.76 573.38 606.78 553.3 0.821817948239312 0.000118350338431577 0.829733964314895 0.0372458618297647 0.911415915211084 0.0189474954732529 0.778304305114748 0.0484945707172042 5.67 6.36 8.01 8.2 7.78
"1584" "Lasp1" 207.96 200.4 272.91 218.44 128.34 123.01 122.15 115.23 105.72 72.81 60.33 -0.880422393030839 0.00011970347484861 -1.08921172803657 0.0429994130762631 -1.62725154380585 0.00186191305330576 -1.89851257065163 0.000229276949953706 0 6.93 8.22 8.26 7.37
"1585" "Rps25" 1600.04 2130.34 898.8 2008.71 2247.8 3827.13 1655.94 3563.19 2407.97 2916.96 3479.8 0.766767573747395 0.000120803528427214 0.537092696261534 0.164417858588087 0.813740880880713 0.0226166781682629 1.06827966823455 0.00114264478489369 6.09 9.21 10.8 10.4 9.9
"1586" "Cdc42ep4" 22.69 20.23 26.93 20.2 40.82 42.18 64.1 51.74 105.09 105.72 10.45 1.14280982714897 0.000120891772943694 2.22282721272958 2.66e-08 2.23145014884793 2.87e-08 -1.10722333382539 0.263208332597347 0 6.87 8.58 8.56 7.56
"1587" "Cinp" 105.23 104.04 93.45 112.48 151.89 167.7 218.41 245.92 199.14 265.7 190.91 0.916899989353589 0.000121004619717233 0.939976591554213 0.0304672737959372 1.35599178413263 0.000437833706607291 0.879086230405697 0.0402683521740967 5.14 7.18 9.17 9.4 8.54
"1588" "Hsph1" 285.15 207.42 204.98 194.72 422.09 438.83 492.32 192.81 174.03 608.8 454.22 0.793034738084686 0.000121159196635343 -0.358144309113257 0.750428765723924 1.44848802457059 4.41e-06 1.02591089723754 0.00232538493238704 5.88 8.71 9.23 10.1 9.38
"1589" "Nhp2l1" 72.07 123.52 88.73 120.59 115.62 170.04 255.04 269.98 215.83 215.64 175.02 1.00153127781752 0.000121159196635343 1.09229413742958 0.0179715936136105 1.09102354120974 0.0182295067332288 0.789918518597976 0.111957418227231 6.18 7.72 9.49 9.33 9.15
"1590" "B3gnt7" 11.64 5.98 17.54 18.79 2.82 2.8 3.22 4.96 14.4 9.42 1.35 -1.96695469270985 0.000121317196551018 0.0944458519542955 1 -0.517823994762596 0.777485676622318 -3.32059164732455 0.0121672395507156 0 7.67 9.09 10.1 7.39
"1591" "Txn2" 255.35 231.05 248.47 277.27 305.88 389.29 722.33 432.21 454.27 347.49 392.5 0.869890242272389 0.000122117191792966 0.844213079497134 0.0468661127646315 0.457634507401054 0.376496838411322 0.633355700570598 0.159443708962527 6.56 8.14 9.25 9.24 8.73
"1592" "Rhobtb2" 250.55 235.86 294.75 245.71 178.24 142.02 122.86 127.16 141.07 127.21 264.64 -0.848511207788488 0.00012255171824396 -0.863770428883371 0.121154913149543 -1.01296955977322 0.0597787218967273 0.0438494942629633 1 0 7.12 8.26 8.81 7.85
"1593" "Tomm40" 195.77 243.75 264.58 242.09 303.96 331.32 575.91 497.67 673.8 621.47 442.51 0.852832389046743 0.000123606605435005 1.51019051494326 1.14e-05 1.39355483673826 8.73e-05 0.903580144588593 0.0240171877830131 0 7.66 8.67 9.06 7.94
"1594" "Eif2s2" 209.1 192.97 142.74 221.87 272.81 337.32 436.82 305.67 431.82 352.33 357.16 0.819060140312576 0.00012428909280872 1.17180551872008 0.000879553309434874 0.878302776396312 0.0219815252079294 0.897945969950933 0.0153542162096799 5.98 8.13 9.48 9.51 8.64
"1595" "1700037H04Rik" 42.83 54.86 77.65 62.14 73.66 107.02 211.8 138.1 158.37 223.79 105.61 1.15976427656219 0.000124558376492924 1.41549305362312 0.00447391720594491 1.91433955306946 1.28e-05 0.830940428857429 0.159450202323551 6.43 8.38 9.41 9.75 9.32
"1596" "Trpc6" 0 0 0 0 0 0.64 1.63 4.57 0.37 0 0.36 NA 0.000124959883199098 NA 0.382103795945886 NA NA NA 0.371754669951918 0 0 0 0 0
"1597" "Usp18" 210.76 275.16 187.42 129.13 135.75 94.91 52.76 93.71 73.53 281.65 578.16 -1.0893855399123 0.000126527609307819 -1.44804256866339 0.0245977880077202 0.489456012875523 0.22081779968424 1.52702134070824 1.63e-06 0 0 7.22 6.9 7.16
"1598" "Hmga1" 19.89 29.8 13.8 19.46 27.82 49.19 75.81 44.62 74.01 62.09 39.71 1.25110041330619 0.000126735583363628 1.83547823517805 0.00019141173389492 1.58211895051544 0.00216319634910152 0.937260379681243 0.118880306366306 6.91 9.8 11.4 11.5 10.7
"1599" "1700029F09Rik" 182.39 140.68 131.9 175.18 232.68 249.34 350.71 354.49 367.92 530.43 309.89 0.913820109370154 0.000126843554512031 1.2236968162849 0.0020062521959497 1.75146708699554 6.94e-07 0.976060914060433 0.0193502438440578 0 0 0 0 0
"1600" "Gm3833" 3.05 3.01 1.61 5.43 7.58 7.85 19.99 13.43 29.99 36.84 10.55 1.89879175043094 0.000127311921251274 3.19491471044393 2.61e-07 3.49170624966652 2.35e-09 1.68767618716974 0.0432009533077821 0 0 0 0 0
"1601" "Airn" 10.36 4.27 12.76 8.24 22.87 30.41 52.13 18.88 51.71 200.9 152.23 1.80254583756706 0.000127910462431455 2.53735082135009 8.34e-05 4.49531317548735 1.9e-24 4.09508831050901 3.87e-18 0 0 6.65 8.72 7.89
"1602" "Fmo5" 32.46 22.37 32.08 29.02 20.76 14.14 8.19 8.2 3.19 5.47 9.52 -1.17650447430567 0.000128423158298403 -3.18355371651811 3.13e-05 -2.40556930749043 0.00086512362512496 -1.60614856697504 0.0213864373761495 0 0 6.22 6.35 5.7
"1603" "Blmh" 260.57 299.23 255.75 344.78 357.48 461.28 621.93 590.23 447.99 617.49 465.1 0.807598242681426 0.000129143071660814 0.627003265171772 0.143737032897077 1.0899525092883 0.00265267361363925 0.681077676125137 0.0955398115297502 5.09 6.15 7.32 8.08 7.03
"1604" "Tbl3" 155.14 198.04 211.45 240.73 258.05 284.66 446.44 456.79 442.99 379.87 348.97 0.844301963672355 0.000129246022530507 1.13764031253597 0.00254738606306256 0.915871961149439 0.025517542765682 0.793469197806881 0.0584520038369172 0 8.09 8.99 9.24 9.04
"1605" "Lgals9" 594.09 654.43 527.15 437.62 651.85 815.13 1180.69 1067.75 1249.08 920.39 139.45 0.74733281065556 0.000130433560525294 1.17467338535527 0.000348116652861388 0.734124718897618 0.0438237232364417 -1.98837265556024 0.000229425555380261 0 0 7.91 8.51 6.91
"1606" "Cpeb4" 224.14 230.41 206.48 179.43 158.15 125.21 69 78.52 51.11 85.53 84.02 -0.963893023979944 0.000131340906279572 -2.03950166248141 0.000394713864987027 -1.29667671382251 0.0284872897276417 -1.3223744679951 0.0215554554976128 5.53 7.13 8.28 9.12 7.7
"1607" "Exosc5" 222.61 280.35 303.77 284.58 354.64 389.46 624.09 648.47 559.02 498.89 524.38 0.885906897305632 0.00013159442670601 1.03491082914108 0.0118809472200625 0.870732681537042 0.0469770877997288 0.942623591816111 0.0223875287489105 7.05 8.95 9.77 10 9.25
"1608" "Peo1" 61.3 52.39 72.91 75.99 107.71 105.3 158.55 131.67 139.31 103.19 149.29 0.938405954581221 0.000133187626828821 1.08548684540238 0.0111307209352098 0.652491191653839 0.206510342121616 1.1853055553212 0.00341537265777446 6.47 8.51 9.8 9.36 9.35
"1609" "Gm5465" 4.86 6.81 3.89 6.24 5.21 13.57 27.77 19.76 12.94 23.1 7.85 1.60489831998895 0.000133246725591504 1.24750948232822 0.101882412612432 2.08356471663913 0.0011985295671235 0.5264364241147 0.510540660855714 0 0 0 0 0
"1610" "Gpr141" 14.78 26.44 19.49 32.02 17.31 8.16 2.43 6.91 11.94 24.59 26.59 -1.4135343408557 0.000133272083906715 -0.957233318314574 0.335721431344472 0.0850355800167031 0.964818723245543 0.197847622278288 0.828240495129875 0 0 0 0 0
"1611" "Tbx21" 13.73 28.55 25.52 38.9 17.91 9.35 2.98 8.49 4.25 5.66 3.21 -1.46203676968344 0.000134763760167258 -2.64995352468672 0.00664334277630105 -2.2366143128799 0.0163515261503338 -3.05484306858948 0.00161649909267297 0 0 0 7.43 5.78
"1612" "Nap1l1" 407.16 384.67 418.47 393.87 506.3 694.96 1067.09 518.8 822.32 467.35 448.27 0.796963610315443 0.000134910999656766 1.03594478505508 0.00392890410940758 0.220748261252433 0.677377363492974 0.160612819099583 0.781528163135013 5.83 8.01 9.19 8.91 8.59
"1613" "Akp3" 0 0 0 0 0 0 0 12.5 0 0 0 NA 0.000135847481114243 NA NA NA NA NA NA 0 0 0 0 0
"1614" "Gripap1" 533.29 453.31 587.22 371.01 318.77 268.44 245.42 232.05 170.42 231.16 124.95 -0.869224173482149 0.000136527283255716 -1.5124774918179 0.00444068229676889 -1.07268037282291 0.0525970584713619 -1.96022124642444 0.000155987603935719 0 6.31 6.45 7.34 0
"1615" "Apitd1" 45.46 38.53 32.62 38.13 41.28 82.56 149.48 107.8 106.31 93.17 49.07 1.30039913935374 0.000137116614193525 1.45843113071953 0.010894926608784 1.26809121945913 0.0331581828594824 0.343066997557857 0.609956217066857 0 7.07 8.28 8.6 7.95
"1616" "Klrb1f" 49.51 34.27 29.78 42.56 23.01 16.4 3.56 9.52 9.18 11.71 24.66 -1.57254086522817 0.00013716353125885 -2.08801740402514 0.0398828411657444 -1.73684238693774 0.0850534836660933 -0.662410663036113 0.62613511941891 0 0 0 0 0
"1617" "Gm10789" 0.26 0.26 0.39 0.19 1.79 3.16 3.64 1.77 2.63 4.84 2.55 3.23544857416189 0.000138332245517115 3.25755927576764 0.00825480838958235 4.13750352374993 7.9e-05 3.2129937233342 0.00782104731976665 0 6.96 7.52 8.15 8.25
"1618" "Haus1" 97.46 114.2 105.76 117.42 154.78 157.08 325.35 247.61 255.8 241.21 182.99 1.024899338956 0.00013856711844671 1.23453160732409 0.00692944165204941 1.1498050623299 0.0141305779149112 0.751280153665216 0.145424880611617 0 0 7.33 7.87 6.65
"1619" "Kit" 13.06 13.14 14.12 22.07 6.35 7.21 3.52 6.28 4.89 9.65 32.75 -1.41727453521353 0.00013856711844671 -1.67340843914132 0.0580004210203196 -0.69271396193811 0.499482163700016 1.07018009721862 0.0428741421646723 0 5.54 0 0 5.88
"1620" "Rbbp8" 145.06 136.41 113.7 136.37 186.25 199.53 286.38 256.95 198.6 195.7 133.31 0.805671148500231 0.000140003113689408 0.57968735983947 0.172407125907851 0.5584654929379 0.189874044345731 0.00460674252602572 1 0 6.05 8.28 8.29 7.12
"1621" "Pla2g4c" 4.28 1.76 3.16 3.66 5.66 12.85 17.48 9.59 19.21 36.38 8.28 1.82551028193735 0.000141779370248711 2.57896687633758 9.29e-05 3.50025490032354 1.79e-10 1.36481203017138 0.116643599726886 0 0 0 0 0
"1622" "Isoc1" 139.98 156.11 152.14 168.43 213.99 230.34 383.54 279.36 252.63 169.04 184.46 0.844407764688907 0.000142270083231905 0.712550702285045 0.102672622783369 0.132889404265149 0.867348644580172 0.258832734842142 0.644682413467297 4.91 6.53 7.8 8.07 7.31
"1623" "Mta1" 161.93 147.63 166.24 115.63 216.42 250.14 359.16 222.62 560.51 400.73 355.49 0.82582736045208 0.000142270083231905 1.92253268691012 3.97e-10 1.43842309350985 2.08e-05 1.26560155181414 0.000233943578019633 0 5.38 7.68 8.42 6.69
"1624" "Ndufaf4" 50.55 44.72 44.96 71.27 84.81 81.99 103.95 136.15 117.85 102.47 123.4 0.944016617066398 0.000142430686053942 1.15629409524286 0.00675794424365008 0.954543932373341 0.0358969129857926 1.22268473114211 0.00271635864569367 6.67 7.7 9.24 9.29 8.88
"1625" "Aim1" 244.49 265.26 251.83 230.57 157.89 136.69 116.47 131.99 74.14 69.36 42.6 -0.869499783579192 0.000142636692674235 -1.7422342333027 0.00107324794943715 -1.83838244990002 0.000563752572565245 -2.54163291800865 1.88e-06 0 6.34 7.35 6.49 0
"1626" "Cd24a" 2439.23 2438.76 2341.25 2998.02 2166.93 3148.67 6166.43 7150.18 4862.82 2015.06 180.43 0.86679044975166 0.00014280261435121 0.928856740178921 0.0268924214365309 -0.342113653447859 0.699606714664196 -3.82342531043657 5.78e-10 6.34 8.92 9.91 9.73 7.85
"1627" "Sidt1" 82.42 91.85 109 72.33 76.51 50.36 22.62 33.83 12.44 47.93 17.29 -0.95589113334282 0.00014280261435121 -2.83719693358653 2.96e-06 -0.89125447909817 0.15598586262487 -2.36224555007485 4.78e-05 0 5.63 0 6.76 0
"1628" "Dnm3" 5.78 5.56 2.49 8.25 3.16 2.48 0.4 0.36 3.53 2.22 25.52 -1.78659636189081 0.000143544998705904 -0.645000083506989 0.737648868536941 -1.31410859042806 0.308724851211502 2.2088881569867 1.77e-06 0 0 5.56 0 7.96
"1629" "Prps1l3" 389.29 376.56 317.18 379.71 515.23 630.41 680.4 671.13 546.29 733.49 611.1 0.771620683822923 0.000145115570421947 0.579065564202936 0.149222315501401 1.00417584700522 0.00441708108963707 0.740807030909637 0.044902159148963 6.93 8.06 9.43 9.93 9.03
"1630" "Hes6" 215.35 308.66 251.31 315.39 264.98 411.91 665.21 614.46 377.53 560.87 293.65 0.843051786489238 0.000145584170884945 0.469395630045851 0.357739730770583 1.0404707566361 0.00790728690735577 0.106901976737385 0.914564413804285 5.14 7.68 9.31 10.3 9.07
"1631" "Ipmk" 75.37 69.01 71.32 81.16 89.94 103.62 195.21 140.05 307.84 159.55 74.31 0.83299402825503 0.000145584170884945 2.05239799179646 1.81e-11 1.1042258961931 0.00341271732185229 0.0018455619939423 1 6.35 7.37 8.78 8.55 7.96
"1632" "Prpf40b" 47.42 46.51 62.42 60.05 28.94 31.53 18.52 20.8 21.76 41.85 24.82 -1.11673334435379 0.000146169159840961 -1.31395003746384 0.0577041241888065 -0.370400971276472 0.701029359634186 -1.12412547858382 0.101058966596736 6.14 5.54 7.38 7.44 6.72
"1633" "Cd8b1" 22.18 28.68 25.21 55.71 14.2 12.46 6.44 8.13 59.61 149.06 7614.56 -1.67636506553802 0.000148396407100058 0.855494846544743 0.229279522030966 2.17776173289537 3.96e-06 7.85255733739134 9.29e-212 0 0 5.06 0 11.2
"1634" "Acat2" 56.44 79.97 64.47 100.34 102.59 117.45 152.59 215.68 167.85 153.04 174.18 0.965758995848002 0.000155831499370305 1.15635497372252 0.00929775662124213 1.02309121548372 0.0274420978032426 1.20976141448542 0.00443010135720475 5.91 7.08 7.96 8.14 7.42
"1635" "2210010C04Rik" 10.71 7.81 0 0 0.43 0 0 0.32 106.95 90.76 462.73 -4.62604969276436 0.000158054906431872 4.52978047879217 6.91e-24 4.2929725104121 2.21e-20 6.64301463192938 1.16e-86 0 0 0 0 0
"1636" "Fam20b" 206.36 202.07 218.75 253.5 300.45 324.88 464.08 441.31 252.64 200.27 145.52 0.79752060036992 0.000158666340146117 0.198465173256741 0.768108007979679 -0.136671578222709 0.967680267136511 -0.59740045495201 0.313407876535351 0 0 7.46 7.83 6.49
"1637" "Zfp64" 75.91 95.45 73.57 74.7 125.18 146.23 160.6 159.69 286.44 152.94 84.16 0.888463071239983 0.000160823800529604 1.84183014840554 4.83e-08 0.936562955345964 0.0250967971014036 0.0748037858949082 0.900520493254689 0 8.04 9.48 9.57 8.32
"1638" "Ttf2" 118.11 111.52 114.95 106.39 139.1 164.05 278.37 203.32 394.3 262.74 173.43 0.799367107662623 0.000162724051011303 1.8062622465677 5.18e-09 1.22060439174633 0.000495182126380606 0.621322014310559 0.12990059557067 0 6.48 8.61 8.45 7.36
"1639" "Psmc5" 400.14 442.4 396.88 453.28 538.29 572 1078.52 758.54 600.51 771.64 512.25 0.80009208706332 0.000162739425452523 0.504933871061595 0.271240989308388 0.866673531672217 0.0267107317553761 0.275593679670645 0.585239081721247 6.44 8.91 10.1 10.6 9.63
"1640" "Cdh1" 2.19 1.89 5.05 7.83 0.83 0.47 1.38 0.61 1.64 4.03 430.64 -2.36597668082796 0.000163057744548721 -1.37036844994512 0.426498724707821 -0.0732844260352318 1 6.66627425545623 5.26e-111 0 0 0 0 7.91
"1641" "Irgm2" 137.5 231.81 177.49 156.65 122.78 98.03 65.72 83.85 45.98 105.59 93.58 -0.92544168566215 0.000163467177815577 -1.93536951168812 0.000482774033438866 -0.735974673478154 0.257312295688084 -0.910175749045986 0.124650401987259 0 6.04 7.45 7.71 7.94
"1642" "Hmg1l1" 6.6 8.39 11.14 20.76 12.13 25.11 62.27 52.35 27.3 32.95 20.1 1.69538972911102 0.000163630735138678 1.21962067208639 0.166718551556928 1.49099818617459 0.0646971418401873 0.777915222345471 0.439659313006527 0 0 0 0 0
"1643" "Gins3" 53.09 49.02 40.32 50.72 66.32 74.42 137.95 104.19 95.98 118.83 77.14 0.987170624419205 0.000163913046896698 0.9910840405969 0.0347439235366246 1.29917742950648 0.00263105937148077 0.675829373509468 0.179053612606432 0 0 6.94 7.17 0
"1644" "Igfbp4" 12.28 16.19 4.75 7.72 16.81 12.05 62.51 18.03 682.83 127.98 80.43 1.41802973065651 0.0001643145110072 6.0599434368033 4.4e-89 3.64433536403832 3.4e-18 2.97422261768031 2.04e-10 0 5.67 9.11 8.09 0
"1645" "Snrpe" 660.46 691.87 502.36 724.27 958.68 1094.5 1124.06 1438.75 1183.69 1560.25 899.06 0.839850701641735 0.000166596994204016 0.876501901938402 0.0304061535850181 1.27498781477638 0.000437129418779309 0.4796999073782 0.293014888089631 0 6.91 8.97 9.64 7.99
"1646" "Tsga10" 47.96 51.99 40.42 44.06 21.51 21.06 18.99 16.93 10.28 25.16 15.83 -1.23249258384902 0.000166596994204016 -2.16516117880683 0.0031541297263576 -0.873869521121423 0.300100655925559 -1.54234018786353 0.0329857773331449 6.99 7.63 8.42 9.23 7.5
"1647" "Rbmxrt" 105.74 93.47 76.04 100.2 119.23 163.6 247.5 184.95 262.12 184.83 141.1 0.929887311033255 0.000167690674369749 1.48160664509329 0.000116252134657042 0.977578149738987 0.0255290883469272 0.588097196187776 0.230447460224865 0 0 0 0 0
"1648" "Bbc3" 12.84 31.43 14.45 19.74 34.69 50.93 45.36 58.62 100.07 25.3 202.53 1.27292972370853 0.000169191377464302 2.35098029270555 2.15e-07 0.367180049504577 0.588857641525013 3.36810638423779 2.82e-19 0 8.83 10.1 9.23 10.4
"1649" "Casc4" 68.6 71.03 66.33 68.05 112.73 117.08 146.08 123.49 151.64 180.32 115.22 0.865909497646282 0.000169191377464302 1.14642181629251 0.00285750457032016 1.39633087529409 0.000113098430405756 0.750162617601096 0.0748571807544221 0 5.71 8.08 8.44 5.93
"1650" "Pgam1" 55.39 94.53 63.32 107.9 96.8 155.18 156.33 222.59 150.06 112.79 135.42 0.974208977824481 0.000169191377464302 0.902337090386309 0.0612097187506832 0.490436790604212 0.394873980101603 0.754238451397175 0.127102022005501 7.39 8.74 9.83 10 9.53
"1651" "Rpl36al" 1308.44 1651.81 705.89 1421.36 1801.66 2920.01 1448.8 2460.59 1555.58 2174.55 3336.31 0.762580861547218 0.000169191377464302 0.290495701980351 0.469595072804976 0.773759992070938 0.0324697713289427 1.39129645656321 7.89e-06 5.45 7.89 9.7 10.5 9.64
"1652" "Ell2" 169.16 148.6 154.05 207.21 148.05 85.3 59.75 77.22 12.23 21.92 332.24 -0.874681600801025 0.000169257098974913 -3.79495775956553 2.66e-10 -2.95313436513239 1.75e-07 0.968771708331879 0.00961033353970777 5.24 5.46 0 0 9.88
"1653" "Phf10" 149.89 121.19 161.98 198.85 201.7 230.22 384.01 364.78 316.18 270.94 241.76 0.901863659001197 0.000170367593382272 1.00102701605799 0.0211285350827025 0.778254303643995 0.101562112357359 0.61385646892135 0.227351950278918 0 0 7.04 6.85 6.53
"1654" "Rbbp4" 411.16 366.96 370.32 396.65 508.79 563.86 862.4 705.36 552.94 440.89 335.1 0.773071090929197 0.000172840408989565 0.517503969802971 0.231277266602305 0.190799783932308 0.717143817646494 -0.205027284514761 0.921441534240526 0 8.1 9.25 9.44 8.91
"1655" "Fam185a" 71.33 69.76 68.61 62.41 132.87 131.97 145.18 102.42 232.78 240.78 213.38 0.913193117468341 0.000173532162540205 1.7747771336697 2.92e-07 1.82352558557245 1.13e-07 1.64923498303985 2.57e-06 6.78 8.53 10.7 11.2 10.1
"1656" "Mrps27" 82.36 65.28 77.25 69.07 117.23 119.59 186.22 153.58 173.55 96.18 112.08 0.972001020748138 0.000174035734398282 1.23973150849843 0.00401771807137171 0.388188974658127 0.495267116043525 0.608909004213241 0.235599091547553 6.86 7.75 9.09 8.86 8.74
"1657" "Pfdn4" 115.76 110.42 113.67 126.92 203.02 222.25 250.08 284.09 206.62 305.6 205.81 1.03948074829711 0.000174155364475207 0.824268068268941 0.119936829665654 1.38893270349819 0.00176663928781317 0.818601242453163 0.111957418227231 0 0 6.84 8.27 6.62
"1658" "Snhg6" 362.1 363.89 232.39 289.67 608.64 660.26 520.75 644.1 1048.73 846.15 928.68 0.963505245621149 0.000174412269514361 1.74896756441963 2.89e-06 1.43930960945215 0.000297863152968405 1.57357773724153 3.94e-05 7.22 8.87 10.1 10.5 9.58
"1659" "Sp4" 269.02 276.34 248.97 246.88 167.45 160.04 125.21 120.92 87.35 166.73 71.19 -0.860093841418169 0.000175092185337413 -1.57530955950073 0.00328736183552473 -0.642675453609861 0.327062601447699 -1.87044266138975 0.00034072296768119 5.52 7.32 8.81 9.41 8.11
"1660" "Hspa14" 429.64 472.82 414.01 503.35 542.02 662.74 968.78 941.38 712.95 806.98 467.82 0.775399351972679 0.000175930616524618 0.648077048231268 0.117151251714835 0.826809064405918 0.0322262580888616 0.0402296862349262 0.994219742062664 6.85 8.51 9.52 9.89 9.17
"1661" "Gm11346" 319.6 224.95 345.71 229.75 255.78 148.89 78.35 88.7 104.89 107.6 27.29 -0.97013094857657 0.00017758110441092 -1.41656256746815 0.0208544973888066 -1.37976163042392 0.0235525731833595 -3.35899540859377 1.57e-07 0 8.29 9.02 6.32 8.88
"1662" "A430105I19Rik" 2.56 4.56 2.84 2.82 6.98 7.26 8.54 15.94 2.05 1.41 21.09 1.5991911163276 0.000177886955555024 -0.640192021441549 0.995769591806507 -1.1801207685482 0.673322328259395 2.7226712588467 1.09e-06 5.26 0 0 7.11 8.61
"1663" "Cnn2" 1487.26 1360.61 1722.97 1958.89 1135.69 879.19 561.86 1144.17 424.92 248.12 332.94 -0.811367843013312 0.000177886955555024 -1.9417601838477 0.000231401267656796 -2.71791340338802 6.45e-07 -2.29368922458749 1.29e-05 0 0 9.3 0 8.63
"1664" "Snora31" 765.77 906.46 175.27 174.12 2195.44 1760.14 169.57 284.26 958.14 1021.64 1274.68 1.1250737871192 0.000178483712572088 0.922796535802138 0.0489514831652387 1.01537507458659 0.0290373848373654 1.33462327134204 0.00229478930940346 0 9.02 10.1 10.3 9.26
"1665" "Gbp5" 261.51 322.22 247.22 193.07 229.05 152.15 70.66 93.73 47.89 59.94 65.46 -0.908354785825652 0.000178669977320215 -2.41837564690107 1.54e-05 -2.0945809986235 0.000170112875266037 -1.96748648009231 0.000311247644125249 0 0 6.59 6.6 0
"1666" "Calcoco1" 198.91 191.59 200.32 198.06 113.94 98.47 94.96 106.5 36.29 57.43 264.79 -0.930628185850588 0.000178993303231403 -2.44216190032213 1.41e-05 -1.77992939541544 0.00127877446218377 0.42504277642322 0.362015603616474 0 0 6.61 6.89 8.5
"1667" "Crls1" 103.25 97.71 72.52 130.62 166.33 144.72 207.54 240.48 189.68 166.03 177.95 0.909520582862753 0.000179261331781984 0.908855216411186 0.0421566036080647 0.716731594513343 0.136114701551409 0.816759581326326 0.0677102143192312 5.5 7.31 8.7 8.99 7.99
"1668" "Cdc34" 157.44 204.73 169.86 206.55 247.66 296.68 414.04 408.25 386.68 241.31 320.74 0.887796600576646 0.00017970508445763 1.06638595041748 0.00946843241116026 0.386133506405417 0.471346009415107 0.796650089464106 0.0683330212116436 5.86 7.82 9.23 8.6 8.17
"1669" "Nlrc5" 363.52 636.15 547.32 336.19 346.81 239.03 224.02 213.99 416.33 433.65 389.73 -0.879166536091025 0.000180362399434279 -0.177371478290102 1 -0.118567889018851 1 -0.272624009348809 0.870704185709788 0 0 0 0 0
"1670" "Tmem120b" 67.54 52.66 62.84 44.8 32.93 35.14 8.99 15.3 11.02 47.18 40.26 -1.30268097319228 0.000180424643394101 -2.36982492239524 0.00492826736072051 -0.271773727726935 0.975340923314037 -0.500601974045058 0.703111228989462 7.05 8.46 9.46 10.5 10.1
"1671" "Rabl5" 156.47 165.2 137.12 135.25 176.6 232.34 360.24 370.29 195.88 297.54 110.47 0.939730957736386 0.000181137295587786 0.399410022223008 0.45675500742641 1.00252355224887 0.0248348786816786 -0.426905444410271 0.76184962801348 0 6.4 8.09 8.84 7.01
"1672" "Lhpp" 14.28 23.78 9.44 15.44 29.01 34.22 57.67 44.26 36.77 48.39 28.4 1.39181523987775 0.000181320252098601 1.22455199790487 0.0646695191780115 1.62073176057838 0.00709483684779023 0.851913751093621 0.218291986102988 5.35 6.99 8.21 8.44 8.01
"1673" "Bst1" 37.75 30.68 17.57 17.46 27.78 49.3 75.45 64.95 56.78 103.2 31.06 1.07180963659435 0.000181519740091149 1.13438165752064 0.02226280730862 1.99636987410686 1.78e-06 0.264056638183546 0.588298138965713 0 0 0 6.85 0
"1674" "Wdr36" 293.8 286.13 252.37 324.47 393.11 415.85 573.05 587.78 458.26 436.44 437.62 0.767939789031419 0.000182202189348292 0.664136225615096 0.100993420943852 0.593753194113925 0.154078297102292 0.597648535812388 0.139030193400478 7.34 8.55 9.78 10.2 9.45
"1675" "Zbtb4" 253.05 208.22 245.77 215.26 190.32 153.43 67.48 109.95 53.48 61.34 34.25 -0.823454375521767 0.000182590762699134 -2.10816472730594 7.22e-05 -1.91033602613228 0.000299355042936204 -2.75106020466404 2.93e-07 5.3 6.57 7.37 9.16 0
"1676" "Myo19" 39.4 36.53 42.52 30.95 61.73 57.64 106.28 64.39 151.79 191.95 106.16 0.95707173081014 0.000182700769624045 2.02289660029668 1e-08 2.36155041205771 1.02e-12 1.50706012769359 9.57e-05 8.26 9.22 10.6 11 10
"1677" "Mogs" 252.06 265.18 264.46 326.09 371.25 401.54 537.25 608.91 766.11 606.79 1103.87 0.792632700791229 0.00018362879414478 1.46793903742584 8.49e-06 1.13158479454857 0.0017054517608316 1.99488585905394 1.59e-11 7.09 7.9 8.97 8.72 7.87
"1678" "Adss" 508.65 481.87 399.13 491.3 654.86 721.78 871.55 923.87 795.33 649.66 725.59 0.753958560896376 0.000183690271293319 0.758163996597791 0.0442976931374365 0.466295286133507 0.268038349140075 0.625764978853907 0.102420042206173 6.77 8.71 9.67 10.3 9
"1679" "Hnrnpm" 726.12 681.63 678.02 539.84 663.91 882.25 2014.38 846.73 1066.69 795.89 654.89 0.74723264362485 0.000186251307147111 0.700488324321359 0.0650454658741514 0.277988316020788 0.518240813948225 -0.0033281319263922 1 0 7.78 9.42 9.35 8.36
"1680" "Uqcrc2" 749.05 654.31 547.6 794.11 942.74 980.22 1286.83 1431.79 846.33 858.27 809.56 0.757773045466759 0.000186935749377999 0.30244927331541 0.520642751869076 0.322660537563742 0.484419653220591 0.23836697518583 0.613591186925963 0 0 7.87 8.46 7.65
"1681" "Uqcrfs1" 398.36 458.47 434.25 433.42 564.6 587.92 891 934.82 732.81 411.2 659.52 0.788330329055016 0.000187216010369625 0.765332967046726 0.0576736034865112 -0.0682659591543378 1 0.613310186303678 0.140354707637355 0 6.17 8.06 7.56 7.57
"1682" "Klra2" 48.04 94.36 47.31 44.18 46.04 31.36 8.86 7.9 13.43 20.62 17.37 -1.3126439548896 0.000187681513540908 -2.1222989705006 0.011998873231616 -1.50371394255993 0.0824270687655387 -1.75116052121765 0.0340330238753703 0 0 0 0 0
"1683" "Sh3pxd2a" 185.4 152.38 195.87 133.42 144.05 109.27 67.73 56.9 106.59 42.47 20.69 -0.819642771594502 0.000189732908066671 -0.645766066238233 0.320420591998107 -1.97332214694321 0.000199754594173262 -3.0108326104306 3.39e-08 0 0 8.49 7.44 6.9
"1684" "Polr2h" 135.07 135.07 124.72 148.68 193.97 209.62 361.01 328.79 343.19 340.19 309.28 1.00834997144677 0.000190009791144988 1.33662130620277 0.00268008698776163 1.32395452366292 0.00317923745190742 1.18652733320832 0.00848227735938148 6.36 8.21 9.79 10.3 9.05
"1685" "Ralgds" 169.12 160.84 192.73 157.9 102.38 96.84 66.24 100.25 52.09 49.47 34.01 -0.89608587737378 0.000191491331214802 -1.70770761154599 0.00164422281512074 -1.78216014913807 0.000987681326693024 -2.32275504258885 1.72e-05 6.05 6.6 6.96 6.77 0
"1686" "Prpf31" 171.85 205.65 159.32 219.77 226.92 263.85 401.11 410.7 320.82 282.86 255.12 0.783788367370872 0.000191526343434723 0.762252374443346 0.0579522978085963 0.580576467611246 0.179227630527143 0.431664294575832 0.346888679560596 0 6.49 8.06 8.61 7.49
"1687" "Gm12034" 865.8 1176.45 921 1725.29 1561.4 2415.77 1672.57 2734.24 2279.53 2646.17 2586.49 0.838496534395074 0.000191652650047054 0.959597655138367 0.0166000848071181 1.17476700786405 0.00167277406569616 1.14185687280954 0.00193406702844463 0 0 0 0 0
"1688" "Tsr1" 255.51 240.29 232.49 301.15 388.86 412.26 531.21 445.05 477.67 513.94 411.04 0.787892413207387 0.000191652650047054 0.892226430283402 0.0191664306590376 0.997812100504413 0.00683169398436348 0.675490954248078 0.0945885363312847 6.61 9.14 10.4 10.9 9.57
"1689" "H2-T10" 194.31 350.65 332.35 317.16 167.16 166.26 109.19 191.41 161.5 151.52 134.55 -0.913770364249183 0.000192806713048427 -0.886764549861413 0.130460415578197 -0.978790478861678 0.0861891675082566 -1.15015632380228 0.0354693827139227 0 0 6.83 0 6.13
"1690" "Isyna1" 199.14 229.39 242.25 255.12 309.84 299.75 512.51 517.8 411.97 347.54 338.71 0.824679551366887 0.000194047795894821 0.83168289650195 0.0475080222717759 0.586322647423436 0.213426448763028 0.549194194801944 0.242372956989869 6.2 7.34 9.34 9.04 8.47
"1691" "Fam65b" 1044.21 869.51 1174.19 999.8 724.24 565.64 401.08 503.7 346.44 182.72 178.26 -0.897295396214469 0.000195894190625096 -1.56061543029865 0.0120521624960469 -2.48358638789294 6.96e-05 -2.51923793269922 4.07e-05 0 8.5 8.95 7.72 9.47
"1692" "Nr4a1" 83.91 82.49 103.07 69.1 64.98 43.16 28.23 25.44 17.04 16.6 6.62 -1.06515337427692 0.000195894190625096 -2.31245690394321 0.000533153560471149 -2.35019899793476 0.000424566784483344 -3.67647911736183 3.32e-07 5.43 7.29 7.87 7.79 7.41
"1693" "Fam55d" 585.66 454.93 444.43 202.82 434.25 335.48 80.29 71.35 100.09 98.81 445.3 -0.873325619851543 0.000197124193076223 -2.07580840251033 0.000203254015466959 -2.09437728280738 0.000186218183542802 0.0776713676748377 0.742150907322949 0 0 0 0 0
"1694" "Nif3l1" 65.39 73.73 65.67 67.34 99.83 107.4 167.37 150.21 143.13 166.16 113.35 0.947499199954729 0.000197124193076223 1.07303008203859 0.0153321645840623 1.28827711117777 0.00217547045726882 0.736488380961274 0.124422353119653 0 8.05 9.42 9.67 9.15
"1695" "Dera" 233.29 297.89 200.87 236.31 316.79 355.89 467.59 528.1 370.01 376.45 388.91 0.784823883229483 0.000198503385575188 0.612020774739665 0.138933425666834 0.636914771974305 0.120884889320618 0.683892843874877 0.0822522121087452 5.37 6.33 7.44 7.73 6.6
"1696" "2610035D17Rik" 106.55 77.56 169.48 78.67 75.18 62.32 39.87 34.46 16.31 22.24 65.86 -1.02899241728608 0.000201523503735562 -2.72807065272254 6.29e-05 -2.28067064671092 0.000522072214929421 -0.714424922839078 0.316017668662265 0 0 6.73 7.45 8.46
"1697" "Slc19a2" 25.56 28.3 25.42 28.01 46.93 47.41 65.79 60.57 120.4 72.08 151.85 1.04057101412628 0.000201523503735562 2.16631977660637 9.97e-09 1.42615530077284 0.00140155752933157 2.50113129301413 1.15e-12 0 6.92 8.87 9.39 8.86
"1698" "Cdc25b" 263.57 216.14 341.14 324.55 223.71 343.95 949.52 479.36 432.88 218.3 103.04 0.801650467589433 0.000204170296810453 0.596187542969996 0.213027758449536 -0.391467473134303 0.515939802039024 -1.47457510489784 0.00296132585000424 0 0 7.25 7.15 7.19
"1699" "Eif3d" 633.71 645.35 634.41 755.55 852.83 874.59 1399.22 1420.37 926.72 943.4 994.36 0.768608060736513 0.000204170296810453 0.473895296453622 0.30728585531366 0.499631389787376 0.274083040275296 0.575530051357808 0.172825720902888 0 8.7 9.62 9.79 9.51
"1700" "Apol7c" 37.82 55.51 44.96 44.23 29.52 20.81 6.69 14.58 5.31 55.44 117.36 -1.35002306629403 0.000206777076586897 -3.1031988876415 0.000690874933771587 0.280944603691561 0.649781376233944 1.36288621722774 0.00213465647949877 0 0 0 0 0
"1701" "Zfp758" 312.76 221.29 227.42 280.17 189.64 149.67 100.39 126.64 102.17 100.11 90.5 -0.879116421013992 0.000206777076586897 -1.34981320806306 0.0143039588747783 -1.37919875812111 0.011728277926836 -1.52479515316665 0.00415218702824635 0 0 6.6 5.85 6.4
"1702" "Arhgap25" 1172.99 1130.26 1165.86 1117.19 782.03 706.24 412.17 647.23 236.38 248.79 257.93 -0.848152310635733 0.000207530408776237 -2.27815084782371 4.31e-05 -2.20433032458968 7.4e-05 -2.15227923910672 7.88e-05 0 8.1 9.26 9.79 8.57
"1703" "2310008H09Rik" 119.27 98.17 133.18 139.09 155.79 182.56 280.3 237.52 213.22 200.01 155.51 0.805969628178823 0.000208349637017539 0.800415112456411 0.0542754439788524 0.7081444764097 0.104374196555267 0.345079698649895 0.530575603147692 0 0 0 0 0
"1704" "Kif24" 56.75 44.81 43.99 35.31 63.52 78.77 119.28 62.92 142.16 112.52 98.67 0.843300649717394 0.000210911574218473 1.65264221767239 1.02e-06 1.31530808895841 0.000287735217321247 1.12581004520027 0.00231608612385584 0 7.96 8.58 8.4 8.66
"1705" "Casz1" 51.56 63.87 49.96 31.27 26.74 27.09 23.65 19.13 26.34 24.68 11.02 -1.02545911425102 0.000214338483261437 -0.900376297300702 0.202647863628131 -0.994289248407799 0.14342067544327 -2.15750741898606 0.000280966406848276 0 0 0 0 0
"1706" "Ms4a4c" 1702.94 1594.37 1381.15 1420.44 1345.93 926.15 267.18 831.89 77.68 290.78 220.73 -0.855308239336217 0.000215329444571585 -4.29486205011132 2.51e-12 -2.39054911262826 1.84e-05 -2.78819443252626 5.54e-07 0 0 0 0 0
"1707" "Calhm2" 430.37 311.86 456.81 420.93 294.44 196.98 165.35 243.98 154.18 125.24 460.88 -0.846768444522987 0.000215815859979145 -1.39327955803741 0.00814162365813753 -1.69319977758583 0.00118403997091179 0.186495971754728 0.787164535931004 0 7.6 9.39 8.81 10.2
"1708" "Psme3" 445.09 450.58 523.99 564.55 665.93 709.53 1138.48 914.56 831.45 802.96 503.56 0.789012799943842 0.000216239096081537 0.745136691198746 0.0734681145019846 0.694835303547984 0.104374196555267 0.0216708708072328 1 8.43 10.2 11.2 11.6 10.8
"1709" "Utp6" 222.81 196.55 228.2 244.79 315.95 333.97 472.95 414.2 403.99 491.89 358.53 0.78450128445496 0.000217811073423274 0.856709903252742 0.0283895780035902 1.14072604672292 0.00140775595141956 0.684484162485508 0.0939628546866787 0 8.71 9.26 9.95 8.86
"1710" "D030028A08Rik" 73.68 62.68 78.47 74.5 147.49 145.7 123.65 133.55 181.72 208.39 275.95 0.927738337103817 0.000217837642423246 1.32900128956505 0.000740396311365136 1.52657012780394 5.16e-05 1.93169096458736 1.34e-08 5.64 8.87 10.2 10.4 10.2
"1711" "Ndufc2" 258.98 345.51 241.09 311.09 378.52 447.93 597.92 707.22 876.42 817.28 625.48 0.881952650363612 0.000218782062584934 1.59971699257564 1.03e-05 1.49892501556693 5.79e-05 1.11305833972941 0.00513522578048632 0 0 7.82 8.13 7.16
"1712" "4632428C04Rik" 85.08 57.06 89.3 38.33 38.78 34.61 30.04 17.02 56.61 95.17 1.93 -1.16329552751306 0.000218800954539655 -0.252601092317293 0.980455758766117 0.49684885511816 0.340363336685864 -5.12698526337081 9.23e-09 0 5.87 8.34 8.62 7.52
"1713" "Bak1" 157.48 192.1 180.06 180.65 231.49 240.99 338.47 442.23 245.12 179.23 171.26 0.819113571234806 0.000218835520274654 0.465080028263829 0.352688832555452 0.0134039656766492 1 -0.0522199435322349 1 0 0 9.73 10.3 6.85
"1714" "Car2" 99.88 76.73 57.82 71.81 20.43 27.82 33.95 39.36 191.3 23.58 20.27 -1.33299415496373 0.000218973396315563 1.32117413874745 0.0010225929602974 -1.69902711150626 0.0299366703215869 -1.91724474101913 0.0115660414172702 0 5.39 8.6 0 0
"1715" "Lrch4-sap25" 38.01 37.32 54.37 28.28 24.31 20.46 13.97 14.71 25.65 24.86 23.34 -1.10490753132358 0.000219180363771305 -0.622711196272803 0.463121461605964 -0.667843725714734 0.412055859563087 -0.758865461059871 0.327767921715564 0 0 0 0 0
"1716" "Eif4h" 1046.01 1242.48 1226.38 1358.52 1388.4 1686.19 2674.44 2780.39 1935 2447.79 1608.36 0.807521960828103 0.000219640078988255 0.667407885486929 0.129149102170695 1.00655411123515 0.00975019399147663 0.400664680910789 0.41789195573568 7.38 8.43 8.86 9.77 8.44
"1717" "Omd" 6.9 6.14 7.13 2.02 18.79 23.7 27.77 8.51 78.5 41.87 37.42 1.82773660818659 0.000220208889602298 3.82278298646934 5.58e-13 2.91600725054329 3.25e-06 2.75389989104377 1.47e-05 0 0 0 0 0
"1718" "Pgls" 548.58 877.87 553.76 691.67 775.37 957.66 1256.07 1527.37 995.46 777.51 1137.07 0.757340411258459 0.000220421496728402 0.575580036569597 0.162507829954962 0.219077921136212 0.641205840380187 0.767465857107739 0.0407968923688402 6.86 8.76 9.85 10.3 10.7
"1719" "Chek2" 92.47 79.2 72.67 78.9 136.69 136.68 161.26 168.82 142.74 280.82 181.23 0.900628500276604 0.000221167128795869 0.820783939188746 0.0677170439040907 1.79703994963219 3.51e-07 1.16521605400017 0.00346932929180018 0 0 8.1 8.29 7.49
"1720" "Rplp0" 5771.63 8527.59 4660.2 7022.95 10486.47 13118.25 11311.2 15270.47 13496.38 13325.24 19652.46 0.949763140880536 0.000221167128795869 1.05503946617362 0.0142596346321112 1.03662848427935 0.0164806234216207 1.59717688016062 4.51e-05 7.03 8.92 10.1 10.6 9.41
"1721" "1810027O10Rik" 339.13 302.06 161.48 255.03 390.24 507.95 498.81 641.23 450.41 523.24 352.96 0.946386371061815 0.00022130689046383 0.76838027591964 0.102253469040656 0.984614251845589 0.0274420978032426 0.416646113481587 0.387992563103515 0 0 0 0 0
"1722" "Nfkbia" 1313.55 1369.12 1022.25 1190.13 870.67 802.97 424.82 605.31 317.66 450.28 844.86 -0.856351164213074 0.000222988528438372 -1.9457682548757 0.000344114971690006 -1.44242929186102 0.00922066552577808 -0.534539395861873 0.470901165701699 5.91 6.76 8.05 8.33 9.66
"1723" "Hdgfrp3" 67.93 68.39 70.71 56.8 54.37 41.2 21.62 20.66 37.81 35.4 6.98 -0.936509354824408 0.000223165253720058 -0.802768867734726 0.239280697014318 -0.897787356751601 0.164837108423906 -3.24023777551231 1.44e-07 0 5.32 0 0 0
"1724" "H2-K2" 322.07 387.91 391.55 309.31 241.64 213.94 83.77 202.6 47.36 94.81 156.44 -0.927160512571595 0.000223662754673457 -2.89674149341557 9.42e-07 -1.89537134026368 0.000833847935125382 -1.17287303831158 0.0402492812795273 0 8.66 9.57 9.75 9.62
"1725" "Npr3" 0.7 0.52 0.13 0.64 2.11 2.7 1.86 3.62 0 5.29 0 2.37040264635032 0.000225278511423929 NA 0.603423299317028 3.41049929157038 2.68e-05 NA 0.598638129134154 0 0 5.36 7.84 0
"1726" "Grm6" 7.53 5.79 11.53 4.71 2.11 3.59 1.4 0.78 0 2.05 0.27 -1.90737873468977 0.00022634621646853 NA 0.00115759114849349 -1.84995045464071 0.168360455535161 -4.77454305198268 0.00481564318136376 0 6.34 0 0 0
"1727" "Uaca" 4.64 1.35 2.42 1.6 1.03 3.51 26.08 1.99 3 3.76 2.11 1.70387246691247 0.00022660820754181 0.261592431659887 0.789376415955859 0.587362592841644 0.476066949976722 -0.246127070128808 1 0 0 0 0 0
"1728" "Fam63b" 379.54 393.45 336.66 363.3 268.99 250.76 142.04 160.1 98.33 151.77 125.26 -0.841691233503623 0.000227911216566371 -1.90493300510376 0.000591887917939775 -1.27874990813255 0.0254605253833079 -1.55571076905621 0.00445249674946023 6.71 7.59 8.99 8.88 7.87
"1729" "Mir703" 4056.14 7199.21 3921.12 8888.63 8117.77 12850.49 7241.22 13833.5 6548.64 7185.26 11412.12 0.804922512645166 0.00022921626098427 0.122324810429249 0.906895046019308 0.256169848651062 0.663714784943438 0.923624403964141 0.0149293625124751 0 0 0 0 0
"1730" "Pdk1" 156.85 197.63 183.77 207.76 288.62 293.07 334.95 363.15 284.71 209.55 277.91 0.778640224112704 0.000231572142091273 0.610298196983642 0.156598301591325 0.168099552042021 0.802423099435685 0.575422778357175 0.178907665407618 5.82 9.07 10.5 10.7 10.5
"1731" "Rara" 182.77 204.01 289.25 168.69 134.52 116.51 106.41 110.9 53.45 58.43 115.5 -0.85091694832824 0.000231634741607347 -1.98221135632029 0.000191716480664089 -1.8536920149831 0.00045962953529283 -0.870580357737361 0.110704253455173 5.82 8.38 9.29 8.74 9.43
"1732" "Mrpl28" 224.58 236.63 247.16 296.31 349.33 371.18 512.86 602.33 448.33 463.14 449.4 0.869594242335776 0.000232417203315275 0.835896882992999 0.0608403714501871 0.882784206068613 0.0450770289554397 0.83933596695977 0.0527145007386468 0 6 7.61 7.51 6.68
"1733" "Glrx5" 142.88 172.09 134.32 151.55 228.03 248.79 377.38 300.09 322.83 359.55 294.44 0.941952961082416 0.000233657006531776 1.10379379059493 0.0117219877293328 1.25921154845274 0.00276203926078214 0.970992815172153 0.0286037199483279 6.86 8.14 9.44 9.91 9.2
"1734" "Cdc37" 351.18 373 351.32 383.66 429.13 516.24 935.97 595.19 515.98 412.07 596.53 0.763182010975389 0.000233950026732133 0.500248964753201 0.262198144827304 0.175823253278012 0.755262813650981 0.709528512703884 0.068545397775256 0 6.81 8.64 8.63 8.03
"1735" "Mrpl40" 147.7 149.44 152.24 173.08 193.21 253.73 370.83 367.26 237.72 254.83 212.97 0.92887054656729 0.000234700279805846 0.611282155154821 0.249305376570366 0.711553998742378 0.154919222284326 0.452669088749154 0.404708928444141 6.06 7.42 9.71 9.93 9.28
"1736" "Rabl2" 7.34 0.73 11.93 7.54 15.55 19.54 38.77 23.05 17.58 19.57 15.64 1.81511698342275 0.000237148749345702 1.35240651100844 0.142944462134104 1.50711519649184 0.0896421504271294 1.18371195317239 0.211069715727722 0 0 6.55 6.89 6.18
"1737" "Tcerg1" 291.51 243.54 269.16 233.82 377.33 422.41 611.66 342.61 538.74 405.41 361.22 0.756808833448749 0.000237148749345702 1.05381295102188 0.00249721417113667 0.643605440948992 0.105005015361375 0.477101539684496 0.250984944101732 6.57 8.88 9.94 10.1 9.35
"1738" "Atp5k" 624.67 605.38 317.8 488.75 766.96 952.28 874.14 1187.74 668.94 1236.46 773.45 0.892650981838302 0.000241068216775897 0.393786065997357 0.414946636268626 1.28005291420295 0.00123814991415672 0.603217281685011 0.179648738427937 0 0 6.81 7.8 0
"1739" "Cdk2" 243.38 198.41 223.44 248.21 265.73 318.69 517.58 471.83 378.78 226.57 107.78 0.784897841474791 0.000241771811069285 0.730050189488966 0.078431353268813 -0.0113531200405931 1 -1.08322047560543 0.0514798804511095 0 0 7.64 6.47 6.33
"1740" "Gcnt1" 219.51 195.26 198.95 227.67 155.39 124.8 81.15 109.42 42.41 32.56 97.81 -0.837782930392317 0.000241771811069285 -2.31029828359413 1.54e-05 -2.69160206692432 7.25e-07 -1.10472079406176 0.0378020826513983 0 6.77 7.72 6.87 7.15
"1741" "Crebl2" 181.01 175.67 189.64 163.58 144.9 106.37 63.8 63.84 31.86 52.13 65.52 -0.905760598598935 0.00024397963402637 -2.47779764184587 2e-05 -1.76743004877517 0.00195055266408679 -1.43760855173017 0.0105053263051485 0 7.67 8.39 8.27 8.01
"1742" "Eif4e" 165.56 151.68 135.92 187.31 209.65 223.57 357.16 320.59 517.94 292.18 241.19 0.794616958980481 0.00024397963402637 1.69365398525321 1.27e-07 0.867726432221851 0.0291304070070045 0.591039097324681 0.17056853702927 0 0 9.5 9.2 8.08
"1743" "Lama2" 0 0.12 0.46 0.18 0.19 0.53 0.08 4.53 0.62 0.34 1.45 2.81006420931559 0.000244254319100248 1.70626879694329 0.226175665104847 0.839535327806754 0.559056212882447 2.93198157657135 0.010892311908407 0 0 0 0 0
"1744" "Crb3" 31.35 20.66 23.16 39.11 13.44 5.39 2.63 8.2 4.17 4.8 0 -1.94598243848174 0.000245034004733921 -2.77638174749171 0.0501799494937583 -2.57339472532785 0.0575338618174672 NA 0.000742078558100808 0 7.47 7.58 8.64 8.67
"1745" "Dntt" 5.1 3.36 5.45 12.07 1.72 4.38 51 25.44 0 3.13 0 1.66769200755915 0.000247507423700445 NA 0.0408468558026932 -1.05316686851526 0.678043115667092 NA 0.0381363165929465 0 0 0 0 7.46
"1746" "Vdac2" 471.71 485.8 438.09 520.01 666.59 709.19 865.25 1007.51 779.16 748.63 632.98 0.761987597557806 0.000247677448207011 0.702187648348736 0.0804365867875229 0.644520895953602 0.118019031314327 0.402427949301644 0.371998141290934 6.46 8.29 9.79 10.4 9.19
"1747" "Gm6724" 34.91 84.82 40.52 96.62 57.37 132.8 171.88 181.79 128.44 117.42 76.34 1.0821438601265 0.000248683470124259 1.0000561633106 0.0676326239737439 0.870639754932792 0.124527986243765 0.24947268480039 0.738180721860437 0 0 0 0 0
"1748" "Fam55b" 221.29 199.66 202.41 172.13 157.14 137.7 46.69 91.91 16.47 21.77 145.23 -0.876011496088437 0.000249488767587613 -3.5939313345641 1.55e-09 -3.19143048210224 3.62e-08 -0.453504294708439 0.567110787902114 0 0 0 0 0
"1749" "Mgrn1" 554.33 458.27 627.55 487 406.94 287.33 246.44 274.8 192.5 94.52 108.52 -0.80736000878486 0.000249793802841582 -1.46599142033134 0.00500427485159005 -2.49215833171448 2.81e-06 -2.29288891340646 9.72e-06 0 0 5.98 0 7.68
"1750" "Eif3g" 596.07 611.73 550.57 674.78 763.45 928.75 1155.15 1304.02 1007.05 972.57 951.06 0.770762258072054 0.000250128625899527 0.727310051910322 0.0729114157412469 0.677048732872577 0.10176445959863 0.644783002121527 0.113917152861464 0 5.94 8.66 8.48 8.25
[truncated: 3,808,778 more chars]
