# Supplementary material for: Integrative analysis of RNA polymerase II and transcriptional dynamics upon MYC activation
Source: HighWire-hosted journal article supplement (doi:10.1101/gr.226035.117), 2017-09-13
Supplement: Supplemental_Code.zip [file liver_tetMyc_RNAseq.xls]

genes	C_average	T_average	Toff_average	Tvd_average	TvsC_log2FC	TvsC_padj	ToffvsT_log2FC	ToffvsT_padj	Myc_indep_UP	Myc_dep_UP	Myc_indep_DN	Myc_dep_DN
0610007P14Rik	66.7898154	37.25421122	52.36650766	38.32733239	-1.094368876	4.92E-36	0.539782128	3.19E-05	no	no	yes	no
0610009B22Rik	41.49466637	29.71829287	37.01421996	33.40956039	-0.715554263	8.99E-13	0.356800723	0.001434122	no	no	no	no
0610009O20Rik	15.08747064	18.24240955	18.31758758	18.50039249	-0.002032009	0.973916073	0.080134316	0.248739296	no	no	no	no
0610010F05Rik	14.52480895	19.05504575	13.23888585	16.30335236	0.146987469	0.127339516	-0.468780496	3.78E-07	no	no	no	no
0610010K14Rik	8.252608586	11.72377462	6.977369797	9.826463469	0.246954049	0.037329392	-0.685933672	1.29E-08	no	no	no	no
0610011F06Rik	119.3655457	77.51165495	80.51499832	68.47603189	-0.85816333	2.34E-26	0.058019205	0.67138687	no	no	no	no
0610030E20Rik	36.27336715	25.69580786	19.57338157	25.88802196	-0.801969632	1.31E-22	-0.286400928	0.017280775	no	no	no	no
0610037L13Rik	20.40036773	22.59561213	18.19721246	22.29037443	-0.129471683	0.09207394	-0.213217201	0.028512538	no	no	no	no
0610040J01Rik	46.3814713	38.24828315	36.63049287	42.7698873	-0.553796321	3.77E-20	0.002966475	0.979669332	no	no	no	no
1110001J03Rik	44.9531808	39.11801966	33.96907666	38.71340235	-0.388185641	0.001439938	-0.224101554	0.181319388	no	no	no	no
1110004E09Rik	18.01320114	27.92724569	9.057992221	23.37547605	0.342589269	0.002068451	-1.485861378	2.41E-29	no	yes	no	no
1110004F10Rik	43.07331409	56.55793503	44.78354787	52.52801958	0.218751258	0.014941154	-0.3617283	0.000351427	no	no	no	no
1110007C09Rik	7.717665689	3.908805846	8.167182932	4.800035857	-1.223020617	1.23E-15	1.118581071	2.58E-09	no	no	no	yes
1110008F13Rik	10.53971341	10.77322649	8.500737446	12.58263309	-0.208187272	0.039166499	-0.29648559	0.004259151	no	no	no	no
1110008L16Rik	10.62692453	17.56398319	8.445135066	16.45171595	0.454079902	1.12E-12	-0.972424189	1.48E-51	no	no	no	no
1110008P14Rik	33.13997423	9.890035604	20.11985627	12.26984382	-2.082650675	2.23E-61	1.157058113	1.27E-08	no	no	no	yes
1110012L19Rik	23.44280855	16.72020685	18.07817379	13.06732713	-0.731979321	3.90E-09	0.158328929	0.374446286	no	no	no	no
1110032A03Rik	22.83249226	6.441551292	11.06133002	5.27777283	-2.150410543	2.23E-101	0.903105829	8.42E-18	no	no	yes	no
1110034G24Rik	9.670669078	9.02810769	9.102885786	7.787092969	-0.358219717	0.000663376	0.100497987	0.458146294	no	no	no	no
1110037F02Rik	16.68658596	25.62403411	22.21612604	25.31424246	0.365750973	5.66E-14	-0.143457149	0.014021125	no	no	no	no
1110038F14Rik	10.01076143	18.6427678	13.54279204	15.28992453	0.590758399	2.46E-07	-0.375457854	0.000269979	no	no	no	no
1110051M20Rik	4.157994228	5.403792298	6.267065856	4.730264903	0.047277006	0.720313303	0.332535902	0.000917028	no	no	no	no
1110057K04Rik	20.70149177	16.92668146	13.69025274	16.02578907	-0.573241453	8.77E-11	-0.230727154	0.001532148	no	no	no	no
1110058L19Rik	32.61085721	20.51262722	24.60762189	20.04833397	-0.949527005	7.52E-16	0.345606355	0.022160577	no	no	no	no
1110059E24Rik	32.2177437	31.68501023	24.69130164	26.14125671	-0.302892894	0.003865088	-0.285362376	0.001384426	no	no	no	no
1110059G10Rik	4.870537554	5.087333214	5.731954404	4.66854874	-0.189975465	0.137134405	0.224078728	0.057604445	no	no	no	no
1110065P20Rik	18.63039825	13.67570894	11.95857903	11.89095061	-0.752360414	1.36E-05	-0.089462383	0.654319352	no	no	no	no
1190002N15Rik	37.03864447	23.66053314	30.13873618	22.70013893	-0.954699053	4.15E-17	0.450790712	1.25E-06	no	no	no	no
1190005I06Rik	12.31152795	11.18506753	3.690240535	6.879098531	-0.503575621	0.002494307	-1.382066701	5.57E-09	no	yes	no	no
1190007I07Rik	17.56158858	18.80244981	9.63820598	16.13980565	-0.184555732	0.063041636	-0.861419069	8.50E-11	no	no	no	no
1200014J11Rik	7.458653328	8.469951864	8.028102156	8.427843702	-0.09180379	0.084047696	-0.005065039	0.950636095	no	no	no	no
1300017J02Rik	100.0949415	37.0132044	57.71672418	31.97447434	-1.615360165	9.48E-21	0.608554011	0.001247044	no	no	yes	no
1500012F01Rik	15.72886199	60.74388222	40.45567364	58.86511788	1.941862692	2.98E-36	-0.771253734	7.09E-05	yes	no	no	no
1600002H07Rik	32.13851809	13.87568832	13.23684851	13.36736578	-1.53018868	5.49E-59	0.046336945	0.642716831	no	no	yes	no
1600002K03Rik	9.097305257	16.3521227	10.91374074	17.37449376	0.645547035	3.16E-06	-0.468097466	0.013936403	no	no	no	no
1600012H06Rik	30.91723499	20.97286938	33.59694925	24.55178181	-0.871159373	1.23E-36	0.787639098	2.35E-22	no	no	no	no
1600014C10Rik	100.7542176	29.00120465	86.74404545	35.92681124	-2.037651426	7.98E-38	1.582120579	1.24E-14	no	no	no	yes
1700001C19Rik	20.3396642	2.870954777	5.396442098	3.212213317	-3.122980223	9.89E-238	0.997775226	7.75E-08	no	no	yes	no
1700003E16Rik	4.413727916	16.45962585	2.718589173	12.17603579	1.593739954	8.72E-47	-2.461460211	1.28E-41	no	yes	no	no
1700008F21Rik	1.149519926	3.520305646	1.261586749	3.392658512	1.946985554	3.03E-10	-1.884901935	1.98E-07	no	yes	no	no
1700011H14Rik	0.913571785	1.591349837	6.901227298	2.817481908	0.521894444	0.092528047	1.977336735	1.71E-07	no	no	no	yes
1700015E13Rik	3.394271209	3.123803573	9.014078537	4.149261764	-0.458804899	0.103916623	1.598689274	9.26E-09	no	no	no	yes
1700017B05Rik	5.608346174	18.22437226	12.20319006	18.99255901	1.379244177	3.47E-39	-0.461475437	0.001938813	yes	no	no	no
1700019D03Rik	0.582401144	23.98539047	27.72073785	23.7616356	5.046141427	1.44E-135	0.307684889	0.081428352	yes	no	no	no
1700019G17Rik	12.03781292	6.024622194	12.05891341	7.820921468	-1.333221028	1.71E-34	1.131751716	8.13E-12	no	no	no	yes
1700021F05Rik	26.86015927	48.03408906	24.17911532	41.78368394	0.682046034	6.93E-14	-0.99950412	1.56E-19	no	no	no	no
1700021K19Rik	12.27756376	12.78056059	15.35918847	13.03115091	-0.264647373	9.70E-05	0.400314907	4.00E-06	no	no	no	no
1700024P16Rik	10.94295656	7.193573895	14.4588171	19.66050904	-0.917178419	2.28E-07	1.114426831	2.08E-05	no	no	no	yes
1700029I15Rik	9.048326225	6.088421392	12.06872846	6.346486914	-0.889703597	1.24E-05	1.126516162	5.82E-07	no	no	no	yes
1700030K09Rik	5.545723591	13.53363548	6.020185939	12.35131505	0.980452478	2.56E-35	-1.054554107	1.98E-20	no	yes	no	no
1700034J05Rik	2.964628301	5.478485593	6.195924134	5.46350318	0.51846696	0.002149367	0.343004392	0.115267371	no	no	no	no
1700034O15Rik	0.036773008	23.8166209	33.50973942	19.84816743	8.413686862	3.14E-29	0.565371054	0.035521043	yes	no	no	no
1700037C18Rik	3.881277568	4.222276677	3.733242392	3.156374159	-0.151950076	0.353299613	-0.099292821	0.63553199	no	no	no	no
1700037H04Rik	3.591944275	24.66827954	7.599998037	14.35034576	2.411575367	1.49E-84	-1.561699979	1.82E-32	no	yes	no	no
1700040L02Rik	3.098323353	2.680174201	2.050207375	2.629181147	-0.363810117	0.112128015	-0.37420052	0.226250462	no	no	no	no
1700049G17Rik	5.014145468	4.294916613	6.378291924	3.976120972	-0.562346486	0.000163721	0.711024726	5.44E-06	no	no	no	no
1700052N19Rik	10.37520268	11.89109227	9.086552431	12.12599862	-0.093755	0.212562564	-0.281815201	5.75E-05	no	no	no	no
1700066M21Rik	42.73779382	18.52303102	16.76830247	19.59090585	-1.525991568	2.18E-42	-0.022107758	0.876528513	no	no	yes	no
1700067K01Rik	4.033741451	9.828369755	8.138908104	7.129801314	0.97188635	2.27E-10	-0.140234702	0.615981969	no	no	no	no
1700092M07Rik	1.687631911	6.937644382	2.55271765	5.159364478	1.673428975	7.71E-10	-1.264255995	8.77E-06	no	yes	no	no
1700094D03Rik	6.061159765	6.622399958	6.863666395	6.156803351	-0.224978976	0.06328295	0.209240082	0.128940433	no	no	no	no
1700109H08Rik	2.930008513	6.798566013	5.327803272	5.889409055	0.906005446	4.97E-05	-0.213949364	0.384674625	no	no	no	no
1700123O20Rik	30.90326112	25.78471708	31.51319539	24.43627885	-0.492355433	4.11E-15	0.310353258	0.000366386	no	no	no	no
1810009A15Rik	43.45143624	59.7775035	41.47670763	65.2862277	0.286357733	0.003384846	-0.561355469	1.68E-06	no	no	no	no
1810010H24Rik	5.510637678	2.593377878	16.95152005	4.264270882	-1.402050567	6.83E-18	2.72812549	1.85E-24	no	no	no	yes
1810011H11Rik	1.642038118	6.44169236	5.896667414	5.066131913	1.665188736	1.36E-25	-0.015568266	0.95090531	yes	no	no	no
1810011O10Rik	46.86287178	15.59740947	28.15120077	14.47746264	-1.932680938	2.35E-31	0.968940213	3.70E-10	no	no	yes	no
1810013L24Rik	34.43294106	20.10389547	26.22255971	19.91174738	-1.083590003	4.74E-24	0.48642781	8.86E-11	no	no	yes	no
1810022K09Rik	16.27020181	30.58435288	26.95270945	31.50475826	0.705332004	2.78E-11	-0.175570714	0.042619618	no	no	no	no
1810026J23Rik	36.52060924	40.10091565	29.45950316	40.34851725	-0.114923502	0.15301185	-0.40084453	3.00E-05	no	no	no	no
1810030O07Rik	11.06108896	23.7322763	20.14345687	22.39394832	0.806169856	2.36E-47	-0.147386009	0.01726549	no	no	no	no
1810037I17Rik	20.15839468	22.51839418	20.45442148	22.44169063	-0.041754564	0.731342409	-0.132740478	0.361798428	no	no	no	no
1810043G02Rik	7.324018292	10.66674952	7.273306014	10.51142918	0.220491823	0.067177126	-0.412231549	0.002466701	no	no	no	no
1810043H04Rik	33.61773292	39.47503077	22.02175973	33.01602538	-0.027488216	0.85568172	-0.736661782	2.25E-06	no	no	no	no
1810046K07Rik	4.308245698	0.033370109	3.001420929	0.039539888	-6.823769635	1.62E-31	0.832428103	0.297594569	no	no	yes	no
1810055G02Rik	22.0274659	24.10460157	29.37029056	23.82356153	-0.169628732	0.230624136	0.381709698	0.109878821	no	no	no	no
2010003K11Rik	19.73456597	1.648834277	26.59836319	3.813857647	-3.73561898	1.23E-14	3.273348302	1.85E-08	no	no	no	yes
2010012O05Rik	8.780506848	12.92504119	13.42051688	12.20299813	0.267927513	0.002700383	0.175363364	0.165866287	no	no	no	no
2010107E04Rik	66.239964	69.04742661	67.25961769	72.34898477	0.281247615	0.295220762	-0.45901614	0.164140767	no	no	no	no
2010111I01Rik	17.60015412	17.17354945	18.90003712	13.74684681	-0.336463386	6.46E-07	0.231520604	0.001986894	no	no	no	no
2200002D01Rik	17.88567924	6.555067134	30.48815333	13.7128234	-1.765639943	6.87E-18	2.237231201	1.34E-13	no	no	no	yes
2200002J24Rik	0.036493913	5.000967739	5.775684167	3.958728399	6.107593422	1.93E-14	0.243393779	0.331982649	yes	no	no	no
2210013O21Rik	5.176565925	16.47863574	14.23797168	9.976488634	1.349325232	6.99E-21	-0.084528874	0.647831754	yes	no	no	no
2210016F16Rik	21.86038974	16.02436141	14.72215778	17.73575898	-0.75132194	2.51E-14	-0.01053992	0.947901748	no	no	no	no
2210016L21Rik	20.27760728	36.61578287	26.08791731	37.22314626	0.535398174	3.15E-13	-0.371102231	0.000576006	no	no	no	no
2210018M11Rik	10.58804224	14.73223784	12.17317446	13.9133565	0.152764502	0.053958058	-0.166181853	0.012047902	no	no	no	no
2210408I21Rik	2.582593759	3.747970863	2.866426495	3.484145975	0.227985263	0.058514448	-0.266370159	0.027444813	no	no	no	no
2300009A05Rik	15.45543232	13.68893268	9.593549093	13.25370094	-0.474304552	3.29E-05	-0.41357592	0.001723026	no	no	no	no
2310003H01Rik	6.350216736	10.44480845	5.29189871	9.844552127	0.366596528	4.75E-05	-0.829367571	7.57E-20	no	no	no	no
2310007B03Rik	0.216128661	10.50007016	11.82120287	10.52036828	5.221533213	4.35E-81	0.271459894	0.547591043	yes	no	no	no
2310009B15Rik	6.454592209	6.562728302	5.41612005	4.058766383	-0.317225036	0.021292645	-0.12937481	0.5821715	no	no	no	no
2310011J03Rik	22.86342572	23.25515889	22.61870918	17.92054757	-0.268062498	0.00325718	0.048580675	0.650243933	no	no	no	no
2310014L17Rik	5.741571127	2.375434603	1.476422214	1.889206171	-1.438256838	8.90E-24	-0.685972265	6.27E-05	no	no	yes	no
2310022A10Rik	3.039210463	7.969375979	4.076273807	7.020453271	1.120191908	1.66E-27	-0.903280523	5.55E-16	yes	no	no	no
2310022B05Rik	12.64623753	19.21122015	15.46871184	15.66458931	0.282052579	0.001398382	-0.188067267	0.1049471	no	no	no	no
2310030G06Rik	27.08088673	5.899548873	19.28015107	9.017148681	-2.427083686	3.01E-71	1.737061395	3.59E-19	no	no	no	yes
2310033P09Rik	10.08639043	19.73267442	11.19687249	13.9714579	0.651478346	9.09E-08	-0.709245762	4.69E-08	no	no	no	no
2310035C23Rik	15.02825253	17.53023247	19.55756907	15.38075211	-0.078526371	0.100579636	0.268466201	0.000240499	no	no	no	no
2310036O22Rik	63.73716038	57.20171456	56.1568987	58.7774537	-0.391406153	3.89E-07	0.001051089	0.992904383	no	no	no	no
2310039H08Rik	56.73177903	45.45875857	43.68208981	41.32085477	-0.58039676	5.25E-10	-0.00855004	0.95514161	no	no	no	no
2310045N01Rik	23.57941248	21.51474752	22.19729748	20.11306622	-0.391808484	2.20E-05	0.137093377	0.31709469	no	no	no	no
2310047M10Rik	12.52177779	6.595981049	11.05868273	5.936289417	-1.306840843	4.73E-16	0.913697455	7.24E-13	no	no	yes	no
2310057M21Rik	2.982237397	11.6461448	5.305229689	9.175665707	1.619007718	2.50E-68	-0.971572053	6.63E-28	yes	no	no	no
2310061I04Rik	11.75833225	15.78349109	7.884936042	14.66505824	0.147358041	0.049091961	-0.95875323	8.31E-13	no	no	no	no
2310067B10Rik	20.67274724	16.34465426	14.17804044	16.63838139	-0.681672893	1.95E-12	-0.064709505	0.631531835	no	no	no	no
2410002F23Rik	10.79618883	41.77472989	20.68734527	31.31887079	1.709880077	1.00E-105	-0.97942543	2.35E-19	yes	no	no	no
2410004B18Rik	9.036730033	19.82580452	13.09846843	18.99065202	0.856375758	8.98E-31	-0.525949539	2.38E-09	no	no	no	no
2410015M20Rik	54.30571346	53.79129465	48.99949017	52.08625739	-0.104550419	0.488895144	-0.27268839	0.146589938	no	no	no	no
2410016O06Rik	8.040104774	35.8718634	12.63367817	30.73212513	1.875343397	7.73E-113	-1.433800601	8.97E-35	no	yes	no	no
2410089E03Rik	3.879591165	8.655580192	9.364575555	7.760636266	0.826024845	1.76E-22	0.253935763	0.012296535	no	no	no	no
2410127L17Rik	16.12694125	31.06405106	16.09808995	32.18843483	0.74658917	7.28E-10	-0.934395414	6.87E-15	no	no	no	no
2410131K14Rik	10.38148707	6.610941791	5.168043364	6.034088225	-0.978012552	4.03E-20	-0.203090252	0.083432346	no	no	no	no
2510002D24Rik	31.70241315	29.68741422	23.83865396	28.10023863	-0.375692869	2.06E-05	-0.234111304	0.0030667	no	no	no	no
2510003E04Rik	9.624123284	10.97240295	12.53653662	11.77209357	-0.128249618	0.10036182	0.314193822	0.001590823	no	no	no	no
2510009E07Rik	13.82985491	4.734720058	7.76803306	4.958111043	-1.875670262	1.74E-52	0.830157409	5.36E-06	no	no	yes	no
2510039O18Rik	18.29109839	23.4535715	20.44936446	23.44968645	0.062842899	0.504174021	-0.09803858	0.312901623	no	no	no	no
2610002J02Rik	14.06749381	13.98357729	11.86298049	15.75178928	-0.304316686	0.000288714	-0.140308877	0.21389119	no	no	no	no
2610002M06Rik	15.51185717	11.02818438	13.34552156	10.73913624	-0.826780873	4.41E-13	0.398436263	0.000219984	no	no	no	no
2610008E11Rik	17.25501992	9.755808615	19.24724894	8.480630802	-1.148625183	1.47E-37	1.098554375	1.42E-22	no	no	no	yes
2610015P09Rik	4.710501314	11.92724111	4.774011353	9.083817183	1.037865572	4.37E-20	-1.19992495	1.81E-17	no	yes	no	no
2610020H08Rik	3.638023323	8.002780953	7.441061467	8.976894407	0.874269954	8.08E-14	-0.013051447	0.938054266	no	no	no	no
2610034B18Rik	10.30728989	17.46868862	16.21705889	19.79254876	0.444626147	1.53E-07	0.027568525	0.857906447	no	no	no	no
2610044O15Rik8	7.793289002	18.35673062	12.76629916	17.1511363	0.940075634	6.06E-32	-0.408650736	2.36E-05	no	no	no	no
2610301B20Rik	11.71767245	18.80706928	13.1874709	17.05282986	0.367012959	0.000248528	-0.397116069	9.16E-06	no	no	no	no
2610318N02Rik	0.17225488	26.08627591	1.914867547	18.1561935	6.875278389	2.60E-79	-3.502095697	4.61E-74	no	yes	no	no
2610507B11Rik	72.94705304	60.18446441	56.02674052	60.50946008	-0.453620478	1.25E-10	-0.140117492	0.149447084	no	no	no	no
2610524H06Rik	5.982184362	16.81532963	12.58154238	14.8188106	1.223337329	8.68E-29	-0.312667244	0.013961668	yes	no	no	no
2610528J11Rik	28.09519824	8.322429381	25.70161182	16.16481724	-2.037821488	1.15E-51	1.668612113	1.34E-19	no	no	no	yes
2700029M09Rik	11.62928971	33.99328674	18.71071515	35.35895194	1.346819191	7.43E-29	-0.847259037	2.96E-09	yes	no	no	no
2700049A03Rik	4.426773867	14.98082024	7.806288438	12.10703954	1.457046698	2.99E-52	-0.852040767	2.25E-16	yes	no	no	no
2700060E02Rik	41.15115164	47.14018821	49.05262686	49.4667685	0.185739382	0.2273386	-0.137640559	0.532353745	no	no	no	no
2700062C07Rik	8.788888994	13.26889665	8.915204415	12.83363301	0.301181351	0.001413443	-0.497584525	2.18E-05	no	no	no	no
2700081O15Rik	3.028370177	14.04199068	12.85644952	12.33367852	1.881747654	7.32E-63	-0.001248057	0.992808893	yes	no	no	no
2700089E24Rik	77.28001393	43.0866351	60.21714182	46.90002735	-1.092390878	1.18E-42	0.527573937	3.46E-09	no	no	yes	no
2700094K13Rik	15.06933104	34.99826557	26.12320665	51.79905991	0.961422492	5.19E-17	-0.372185438	0.020727414	no	no	no	no
2700097O09Rik	4.332575033	6.951427954	7.024622198	6.77625064	0.40126786	0.003168217	0.107027522	0.319308878	no	no	no	no
2810004N23Rik	11.27101578	21.92077489	11.5969904	23.44038548	0.709778812	1.33E-55	-0.868961802	4.96E-34	no	no	no	no
2810006K23Rik	9.263063072	10.29459257	7.946818888	10.09521956	-0.14880273	0.058769473	-0.281395128	0.000709822	no	no	no	no
2810007J24Rik	129.4225374	1.623025869	13.32641965	3.636146118	-6.517974015	3.72E-73	2.737215986	1.63E-08	no	no	no	yes
2810021J22Rik	2.558118238	3.522198962	3.74200918	3.384089632	0.16291477	0.167449464	0.203047879	0.122132474	no	no	no	no
2810403A07Rik	22.06049154	30.76064411	28.35013565	27.18408568	0.229729006	8.41E-06	-0.054826951	0.296359366	no	no	no	no
2810408M09Rik	9.766556577	16.0007935	18.27147689	15.54326137	0.382605226	5.94E-05	-0.130183105	0.607422642	no	no	no	no
2810417H13Rik	2.387741302	12.51503623	11.43304147	17.71486688	2.095282572	6.76E-35	-0.050848769	0.843212056	yes	no	no	no
2810428I15Rik	38.76304325	41.41474819	29.87935519	36.00790757	-0.123755251	0.467725232	-0.443595275	0.016984592	no	no	no	no
2810459M11Rik	61.57915035	36.5977557	62.06123406	41.58680606	-1.022642579	4.57E-81	0.824533592	1.54E-46	no	no	yes	no
2810474O19Rik	21.03871524	16.96983712	23.7979893	18.02115693	-0.650176235	2.67E-05	0.618870797	2.93E-10	no	no	no	no
2900026A02Rik	43.46445526	26.39779248	25.24669444	28.10963196	-1.02938632	1.16E-19	0.039230211	0.806328765	no	no	yes	no
3010026O09Rik	14.52087467	17.05590397	9.467160504	14.25040175	-0.082886307	0.574337869	-0.715313425	3.48E-07	no	no	no	no
3110001I22Rik	9.367557912	12.67335285	12.05917952	13.47940137	0.150429322	0.174854322	0.017316993	0.898965926	no	no	no	no
3110002H16Rik	22.73321072	20.940058	16.6160188	20.94126332	-0.405084907	1.03E-08	-0.237339425	0.004598595	no	no	no	no
3110007F17Rik	1.256684718	3.182542874	1.715989945	1.198729084	0.981569129	0.00108202	-0.663455707	0.107320843	no	no	no	no
3110009E18Rik	1.389606806	4.419371455	2.125509654	3.545419404	1.381134152	6.90E-11	-0.957189638	2.42E-05	yes	no	no	no
3110040N11Rik	16.74846822	17.90111605	14.11109828	15.96488755	-0.171538167	0.246322885	-0.201732917	0.289214449	no	no	no	no
3110043O21Rik	12.523831	9.473506714	13.06152748	9.494324677	-0.721681378	1.00E-17	0.598039042	5.73E-06	no	no	no	no
3110052M02Rik	6.071577704	1.119273247	1.463750264	2.314700079	-2.732702239	3.93E-67	0.498183956	0.01518942	no	no	yes	no
3110057O12Rik	22.60627605	9.8075956	21.14626404	10.07476868	-1.485462342	1.73E-59	1.187914729	9.61E-20	no	no	no	yes
3110062M04Rik	2.570644427	2.010629492	3.137104356	2.35953181	-0.660581789	5.66E-08	0.744256873	1.33E-07	no	no	no	no
3110079O15Rik	4.18936838	0.306393257	2.112688791	0.728615469	-4.161494681	5.93E-21	2.657555061	1.02E-07	no	no	no	yes
3110082I17Rik	8.174491525	25.32133828	4.781277637	16.35361088	1.329122558	3.12E-20	-2.270711545	2.71E-69	no	yes	no	no
3300002I08Rik	2.993522905	2.858026567	5.205673293	3.57027683	-0.349797904	0.038036538	0.969106482	1.28E-07	no	no	no	no
3425401B19Rik	0.069505108	19.63722662	3.314968599	11.61231606	7.721633865	9.19E-161	-2.310280055	9.73E-17	no	yes	no	no
3830406C13Rik	16.97158605	16.54420918	16.68447616	13.08453869	-0.333348631	9.34E-05	0.109196744	0.258774214	no	no	no	no
4430402I18Rik	1.506259808	1.761240426	6.210665565	3.104061967	-0.03816762	0.859827444	1.841400886	4.40E-14	no	no	no	yes
4632428N05Rik	4.253494466	6.492148388	8.050485246	5.599399804	0.27772637	0.114174009	0.440959817	0.007701443	no	no	no	no
4833420G17Rik	21.08982506	21.1922837	23.1999673	20.37374227	-0.25372615	0.000698871	0.198718404	0.002025562	no	no	no	no
4833439L19Rik	49.73473557	24.85875992	47.73251625	33.74532666	-1.291248007	1.45E-83	1.028349993	1.47E-32	no	no	no	yes
4921507P07Rik	3.042980422	4.205643676	3.862074524	3.31235187	0.170286432	0.325613949	-0.030793788	0.895739963	no	no	no	no
4921524J17Rik	7.967341163	16.0556568	15.86129578	16.41097405	0.72758463	1.14E-17	0.072453802	0.636068139	no	no	no	no
4930402H24Rik	14.1468658	9.738654407	20.29510332	12.00862013	-0.848841778	5.22E-25	1.179658166	1.79E-39	no	no	no	yes
4930404N11Rik	19.37768309	37.11567654	43.44814433	37.25767283	0.652769847	3.62E-06	0.285487984	0.09236414	no	no	no	no
4930427A07Rik	0.310259569	8.109048434	3.899532913	7.266810749	4.322668544	2.78E-94	-0.877789502	2.30E-06	yes	no	no	no
4930430F08Rik	4.29255181	10.94257646	5.752386767	7.577626028	1.082669455	3.41E-18	-0.856439	2.00E-09	yes	no	no	no
4930453N24Rik	45.51949841	35.39404901	36.54602728	38.4386349	-0.653538137	6.10E-18	0.136959018	0.070378512	no	no	no	no
4930503L19Rik	3.499322493	13.49488905	4.804958951	12.06517594	1.624815934	1.09E-65	-1.351828968	3.37E-43	no	yes	no	no
4930506M07Rik	18.01077459	19.90493681	12.96628406	20.54086761	-0.090682862	0.154439917	-0.564977683	6.20E-05	no	no	no	no
4930523C07Rik	11.23732435	1.921911506	2.194418688	1.441408632	-2.911533011	3.98E-96	0.343399719	0.161429326	no	no	yes	no
4930579G24Rik	2.094125856	8.870932535	5.741264385	7.947160694	1.731948517	4.69E-32	-0.468041851	1.04E-05	yes	no	no	no
4931406C07Rik	67.23405564	21.32167899	23.37809228	19.51622329	-1.917477128	1.06E-159	0.188261784	0.07029855	no	no	yes	no
4931406P16Rik	13.41479262	17.68009712	16.02887131	17.04765547	0.103809369	0.029751106	-0.032192669	0.662911112	no	no	no	no
4931414P19Rik	5.237505566	7.929676294	9.475854995	7.284174154	0.250016607	0.01011747	0.405697092	0.000254259	no	no	no	no
4932438A13Rik	22.04276838	19.40960083	24.77630066	16.91543507	-0.457445246	2.71E-12	0.428007197	2.24E-07	no	no	no	no
4933411K16Rik	30.6284513	15.38551298	35.08838725	20.88747718	-1.346822359	6.22E-16	1.318916117	3.77E-13	no	no	no	yes
4933427D14Rik	3.406041229	10.20926871	5.62335472	8.51844677	1.308336167	2.93E-49	-0.773655624	5.22E-13	yes	no	no	no
4933434E20Rik	28.01181943	34.42707678	34.27875037	33.42591371	0.074471915	0.149971993	0.014524621	0.843451903	no	no	no	no
5031439G07Rik	17.77626428	16.31864731	11.08260294	12.24770628	-0.429039828	1.89E-08	-0.452704276	2.13E-07	no	no	no	no
5330417C22Rik	0.463100151	8.074060386	22.3276761	5.909525699	3.861268289	2.77E-78	1.500259209	5.12E-10	yes	no	no	yes
5730409E04Rik	8.817048265	3.976272299	2.122776008	6.758057592	-1.455806584	9.23E-21	-0.782263822	0.000159968	no	no	yes	no
5730455P16Rik	16.22325626	15.84773616	10.48190536	11.46927104	-0.333268169	6.62E-07	-0.482001343	1.42E-08	no	no	no	no
5730508B09Rik	5.879884794	14.64475501	13.73660458	11.73805249	0.987445208	3.76E-14	0.024018909	0.910217572	no	no	no	no
5730559C18Rik	0.024022981	2.866402509	5.044482108	5.733040209	6.302270563	5.25E-39	0.979583764	6.13E-05	yes	no	no	no
5830415F09Rik	7.058633616	13.9667566	8.492988275	14.11734257	0.704139473	8.41E-17	-0.610380525	8.88E-08	no	no	no	no
6030458C11Rik	13.18643171	19.50357895	13.18443204	18.39865578	0.270800613	9.53E-07	-0.473191746	1.03E-14	no	no	no	no
6330408A02Rik	2.222537588	4.406077941	5.018169445	3.566678815	0.635406848	3.35E-07	0.336006042	0.016508349	no	no	no	no
6330416G13Rik	12.63020642	18.30564984	19.90941041	21.26543702	0.221685466	0.007604693	0.245684222	0.03584709	no	no	no	no
6430548M08Rik	5.835653867	4.582356496	4.402991349	2.942364314	-0.664741269	4.99E-05	0.068469643	0.681151612	no	no	no	no
6430550D23Rik	3.723718673	2.033518487	2.797459259	1.904029563	-1.186601086	7.62E-10	0.584541712	0.021347094	no	no	yes	no
8030462N17Rik	10.61869425	16.33231289	11.78187505	15.85257327	0.325412609	4.78E-06	-0.381701406	2.92E-11	no	no	no	no
8430408G22Rik	81.70700617	20.34649069	70.55447506	19.54514992	-2.315951166	2.50E-17	1.799351962	1.18E-08	no	no	no	yes
8430419L09Rik	24.64860342	26.4054976	14.69316869	22.40768783	-0.168431254	0.007030669	-0.734082572	0.000281727	no	no	no	no
9030025P20Rik	5.995340857	7.457703977	6.897268709	7.654892607	0.027524778	0.870265954	-0.030544926	0.89172268	no	no	no	no
9030617O03Rik	19.84813597	7.545025801	9.028685489	8.582519369	-1.761290355	1.88E-100	0.444790576	0.029383358	no	no	yes	no
9030624J02Rik	9.235495986	14.54383535	14.13818616	14.66988236	0.403827984	0.000556979	0.039223192	0.830542186	no	no	no	no
9130011E15Rik	6.790202301	12.28232052	9.246029093	9.849774315	0.543582432	1.93E-08	-0.321540627	0.007087716	no	no	no	no
9130019O22Rik	2.938277203	4.664910461	4.11113345	4.442292431	0.32145502	0.026802664	-0.030025054	0.894999539	no	no	no	no
9130023H24Rik	6.732343084	2.300426377	3.776324999	2.284278429	-1.861891525	4.55E-37	0.831430023	3.40E-06	no	no	yes	no
9130401M01Rik	9.265442498	13.90645459	8.577413998	14.51296137	0.335765061	0.006015711	-0.62462562	2.17E-05	no	no	no	no
9130409I23Rik	22.88845135	0.365482805	3.693444907	1.136647593	-6.018078643	1.90E-36	2.766082799	3.33E-07	no	no	no	yes
9230110C19Rik	0.735467444	4.201166672	2.001828599	2.959342758	2.179404218	2.77E-26	-0.950682866	1.33E-06	yes	no	no	no
9430015G10Rik	6.922051137	27.57380418	11.82171838	24.48576849	1.674246417	6.16E-88	-1.102027247	2.68E-35	no	yes	no	no
9430016H08Rik	16.58777255	25.94470826	18.28598139	22.5135494	0.383651986	2.34E-05	-0.448268819	4.14E-06	no	no	no	no
9430020K01Rik	8.641658506	29.28919531	18.30232692	32.63756552	1.444741421	3.12E-60	-0.554445868	3.07E-06	yes	no	no	no
9430038I01Rik	4.157444506	3.48998114	3.055217881	2.861227459	-0.592175388	7.59E-09	-0.038092872	0.811900255	no	no	no	no
9530068E07Rik	71.54264693	48.99220028	65.49293576	52.85580432	-0.761541935	5.97E-32	0.418805022	5.29E-08	no	no	no	no
9530077C05Rik	0.198637227	3.48328903	2.799912422	2.579464089	3.752682824	1.34E-81	-0.177353239	0.529987407	yes	no	no	no
9630033F20Rik	8.785310488	14.28589211	5.063169107	10.7936648	0.393633924	5.06E-07	-1.384812204	4.46E-46	no	yes	no	no
9830147E19Rik	5.999341812	2.540148549	3.83818119	5.533733243	-1.58886842	4.79E-20	0.74109712	0.000355864	no	no	yes	no
9930021J03Rik	14.08221902	13.23426812	16.70527632	12.89702354	-0.398847071	6.64E-08	0.445883878	2.77E-07	no	no	no	no
9930104L06Rik	2.983467515	5.819327217	3.503304426	5.248825119	0.688121625	1.01E-13	-0.605524531	1.84E-08	no	no	no	no
9930111J21Rik1	5.17508628	6.850108142	8.796820454	5.365236476	0.039714102	0.783055633	0.514596487	0.003188939	no	no	no	no
A130010J15Rik	8.72976815	8.931871778	8.157714824	8.682769769	-0.263774088	0.000873952	-0.039466297	0.762254031	no	no	no	no
A1bg	105.4441014	0.184108931	0.481446785	4.098619609	-9.119607961	5.43E-23	0.615897941	0.462532522	no	no	yes	no
A1cf	89.17207326	67.8255736	76.00090517	69.62625943	-0.555043555	4.50E-10	0.125768192	0.354385026	no	no	no	no
A230046K03Rik	21.72741687	31.57110382	31.68708903	34.29794602	0.314016814	6.10E-05	0.027775815	0.796163039	no	no	no	no
A230050P20Rik	20.70520114	19.06648919	14.38861251	19.77951312	-0.403988781	0.000163323	-0.316856245	0.022555691	no	no	no	no
A2m	0.340749673	68.88354576	108.013136	70.65003156	7.555455553	6.38E-163	0.478348363	0.027125986	yes	no	no	no
A430005L14Rik	50.0392644	47.09686555	36.14907081	47.29580269	-0.33271095	8.52E-05	-0.346531262	0.00062359	no	no	no	no
A430033K04Rik	5.038774959	5.065162684	3.76075314	4.381112166	-0.32898908	0.001838056	-0.287804604	0.033431214	no	no	no	no
A430078G23Rik	4.135762162	3.235089808	3.910998666	3.654210407	-0.559500976	5.74E-07	0.28536818	0.018470209	no	no	no	no
A430105I19Rik	2.12789803	7.094254433	3.089746073	5.503433455	1.42936419	8.54E-38	-1.07113305	1.66E-17	no	yes	no	no
A4galt	0.328214206	1.579232547	5.338306869	2.632963054	1.962019985	3.52E-14	1.751062949	7.44E-15	yes	no	no	yes
A530054K11Rik	9.665286321	10.67156313	10.608274	8.72224892	-0.199517526	0.156577656	0.125087834	0.330055502	no	no	no	no
A730008H23Rik	4.072498627	20.9674293	7.402267521	22.39792419	2.032242781	5.17E-36	-1.328369571	8.44E-13	no	yes	no	no
A830080D01Rik	3.39377584	9.347911048	7.643998381	9.091947369	1.131472033	2.21E-13	-0.168343003	0.322852198	yes	no	no	no
AA415398	7.045779908	1.020771357	3.408146657	0.980685229	-3.039097536	5.68E-89	1.767827901	1.09E-13	no	no	no	yes
AB124611	3.906633561	14.09401305	13.67710647	10.17239658	1.555600959	5.85E-23	0.076756257	0.714124262	yes	no	no	no
AF251705	2.712482822	9.91014485	10.19917275	7.141064257	1.586020451	4.84E-22	0.114892829	0.578125188	yes	no	no	no
AF529169	0.007213606	4.053533031	0.584867557	0.130904683	7.994615285	1.06E-21	-2.106818574	0.000133832	no	yes	no	no
AI182371	98.31698109	35.24099837	65.90341451	41.41825358	-1.702713971	1.72E-90	0.899483917	1.55E-17	no	no	yes	no
AI314180	27.81338071	38.22949181	27.77493732	35.56224127	0.34670607	0.00084097	-0.550809146	3.85E-05	no	no	no	no
AI317395	46.20445476	0.454439178	4.282227089	0.857005319	-7.131115061	0	3.307776762	3.74E-20	no	no	no	yes
AI413582	8.726685376	18.03286228	17.00848124	17.70286698	0.694004341	7.18E-08	0.064257744	0.6714578	no	no	no	no
AI464131	53.19909477	45.68467374	56.04614185	32.70332964	-0.496445665	4.23E-15	0.363650305	0.037999286	no	no	no	no
AI597479	14.97599617	18.83065853	16.76870531	17.97071593	0.040344426	0.665305297	-0.067883982	0.40669369	no	no	no	no
AI661453	13.12496721	7.633249929	12.76406171	11.38735258	-1.131928846	1.63E-14	0.890314354	9.20E-08	no	no	yes	no
AI837181	20.77903861	17.03805685	20.26719818	16.65663896	-0.59951673	1.08E-10	0.366769405	3.64E-05	no	no	no	no
AI846148	2.400452696	3.100765585	4.051031442	3.772070021	0.018502737	0.900335802	0.533772985	0.002197632	no	no	no	no
AI987944	20.05762904	12.20667756	18.40729408	11.9732319	-1.035922718	4.19E-22	0.708809147	4.55E-13	no	no	yes	no
AK010878	2.521089772	3.956486387	3.442158397	4.197348995	0.378298143	0.000104959	-0.129683581	0.282876801	no	no	no	no
AK129341	0.262862643	5.145363709	0.57308211	2.205700019	3.927430292	2.28E-74	-2.997245512	2.35E-44	no	yes	no	no
AU019823	14.54379718	24.53733283	19.31484872	23.87768389	0.470451756	1.03E-13	-0.262272122	2.33E-05	no	no	no	no
AU022252	42.41236317	15.2880054	27.41688796	18.24684903	-1.80244729	2.70E-132	0.972886207	5.76E-14	no	no	yes	no
AU040320	13.86548673	17.10573824	23.51828867	17.22841982	0.054144021	0.442142038	0.519437635	1.71E-10	no	no	no	no
AU041133	7.966349552	11.3201037	12.53520857	11.08139214	0.191713211	0.154569647	0.268087532	0.045039562	no	no	no	no
AW146154	8.960593812	9.476722234	10.33883754	9.259552223	-0.230044931	0.090776475	0.232457792	0.044976715	no	no	no	no
AW209491	22.61961872	22.13647131	18.18302888	19.75761848	-0.338718891	0.000316498	-0.177275315	0.086077268	no	no	no	no
AW549877	27.09836831	29.52160651	35.91796593	27.8148957	-0.184559642	0.064151491	0.380865742	2.95E-09	no	no	no	no
AW554918	3.419081959	8.501366266	6.368318693	7.924826989	0.980544009	7.44E-26	-0.285415556	0.005359479	no	no	no	no
AY074887	5.157145901	3.178616009	3.786628008	3.007806388	-0.874574338	1.26E-06	0.221379257	0.358690823	no	no	no	no
Aaas	6.430324777	29.09270213	13.21065802	29.74998519	1.881535674	1.12E-151	-1.050242564	4.53E-39	no	yes	no	no
Aacs	64.93770759	6.488517021	16.13603993	16.08291122	-3.743864926	4.20E-88	1.498597936	1.34E-07	no	no	no	yes
Aadac	131.3251972	69.92023275	109.777628	62.94499865	-1.089578859	1.10E-39	0.613271447	1.39E-05	no	no	yes	no
Aadat	53.14297577	3.439143155	12.67739867	7.081575566	-4.306061478	3.50E-66	1.936971258	5.93E-09	no	no	no	yes
Aaed1	47.63219468	26.02819263	33.97837429	25.40385122	-1.138865766	5.28E-47	0.437246406	2.35E-05	no	no	yes	no
Aagab	40.18073388	32.93962295	29.78286122	30.75835195	-0.572354232	5.80E-24	-0.068777348	0.345116551	no	no	no	no
Aak1	7.318933979	10.65240613	14.71099525	13.43228525	0.218934636	0.012591869	0.589152275	1.50E-09	no	no	no	no
Aamdc	22.63072861	16.76192333	21.18117924	16.14115865	-0.658091758	4.77E-08	0.383721703	0.014023554	no	no	no	no
Aamp	88.83859329	78.64073082	82.84533519	77.09902919	-0.286615365	0.01163922	-0.035955744	0.825181938	no	no	no	no
Aar2	22.08944314	20.75569969	17.7743439	20.43739958	-0.386710765	9.20E-09	-0.123944342	0.129056432	no	no	no	no
Aars	60.08781925	29.67251595	29.4961769	29.27476134	-1.247603328	7.68E-41	0.010056546	0.952315916	no	no	yes	no
Aars2	13.36811108	14.32862521	7.239679031	13.94201057	-0.231103019	0.016842367	-0.845992778	2.14E-15	no	no	no	no
Aarsd1	29.80266056	46.04429205	17.70793861	40.21005158	0.449943975	2.24E-05	-1.365018365	1.71E-36	no	yes	no	no
Aasdh	6.810032597	6.706983248	4.397495722	5.196924327	-0.327930374	1.68E-05	-0.49029476	1.82E-07	no	no	no	no
Aasdhppt	27.56769098	31.32212765	22.95240084	32.09281021	-0.034974075	0.678341634	-0.422884849	2.22E-07	no	no	no	no
Aass	84.47241674	7.894128016	32.77488914	32.41552896	-3.728151659	5.16E-26	2.030938102	8.04E-07	no	no	no	yes
Aatf	13.91551865	43.51979756	12.52708928	39.87957081	1.497327467	2.93E-49	-1.828745455	1.81E-55	no	yes	no	no
Aatk	1.278394627	1.900225352	1.96645297	3.324833637	0.248117928	0.215634688	0.150596378	0.678020423	no	no	no	no
Abat	68.3212516	47.94263384	68.04684783	48.61845018	-0.640552018	5.27E-12	0.425615707	0.002873186	no	no	no	no
Abca1	83.26449715	39.52350506	72.45570292	58.05916725	-1.301483614	4.96E-50	0.89821881	3.14E-16	no	no	yes	no
Abca2	42.18668771	22.96090778	10.49018148	23.96305898	-1.198771918	7.58E-40	-1.022153607	1.00E-17	no	yes	yes	no
Abca3	58.6903295	21.4652954	32.62334155	27.21038365	-1.743697473	1.69E-115	0.68723624	2.67E-16	no	no	yes	no
Abca5	6.436623624	2.443140773	8.379261233	2.61894763	-1.705286936	6.75E-48	1.883022056	6.96E-28	no	no	no	yes
Abca6	81.09757639	14.71530254	44.59860194	16.19354422	-2.727461581	1.12E-58	1.625673183	8.31E-13	no	no	no	yes
Abca7	5.807870315	3.524981911	5.603419255	2.966350926	-1.130501215	4.44E-08	0.858637143	0.001275925	no	no	yes	no
Abca8a	60.947509	27.12684965	41.2360515	35.9504093	-1.400727937	1.02E-22	0.615625134	0.003941755	no	no	yes	no
Abca8b	38.00552933	15.67183769	42.18696712	18.48969352	-1.554970325	3.31E-46	1.499024318	5.34E-33	no	no	no	yes
Abca9	4.401320499	2.876894588	5.281135886	2.863103224	-0.875766176	2.20E-12	0.945376695	6.35E-07	no	no	no	no
Abcb10	31.35661383	37.4842535	46.26763229	41.28950909	0.006033806	0.95796492	0.365807663	0.002411942	no	no	no	no
Abcb11	100.7772527	62.91433033	110.1740282	69.20578832	-0.844785265	1.44E-14	0.763703567	7.51E-08	no	no	no	no
Abcb1a	4.558706309	22.55676752	18.05388516	30.79312211	2.055469699	1.42E-10	-0.241329046	0.30725223	yes	no	no	no
Abcb1b	0.588439216	17.85679201	2.253546977	11.40149774	4.612194461	7.16E-255	-2.383438654	2.31E-13	no	yes	no	no
Abcb4	69.85028129	26.65392379	36.49942761	31.93322255	-1.627140201	8.43E-30	0.478777278	0.005972474	no	no	yes	no
Abcb6	45.90309628	30.07370271	22.78689535	31.83934965	-0.885639732	9.10E-73	-0.348670444	0.001688498	no	no	no	no
Abcb7	17.57452141	18.03303443	14.81404655	17.10662369	-0.217124995	0.011500606	-0.232822028	0.000839548	no	no	no	no
Abcb8	23.68109132	45.86788554	33.52217661	39.61865945	0.715523206	6.88E-23	-0.418298195	1.13E-06	no	no	no	no
Abcc1	1.144115138	12.47225817	2.136704857	4.149405617	3.189844995	1.40E-149	-2.389549972	1.46E-61	no	yes	no	no
Abcc10	5.032871599	5.990443201	6.65346493	5.198919842	-0.091961576	0.508848582	0.297705828	0.089232208	no	no	no	no
Abcc2	107.6290464	34.00743383	47.98168275	39.42193489	-1.917025343	7.06E-94	0.546633359	2.22E-05	no	no	yes	no
Abcc3	73.54753598	21.24352112	22.65456045	17.36631526	-2.113802443	3.27E-101	0.210742234	0.275436001	no	no	yes	no
Abcc4	1.775677867	16.41906624	12.64945882	16.15455934	3.043295613	6.98E-70	-0.256303117	0.14307947	yes	no	no	no
Abcc5	3.050981047	25.92165774	47.61662532	25.61862513	2.830516237	0	0.948882468	1.69E-34	yes	no	no	no
Abcc6	65.87055771	17.49000866	38.08875043	19.50762444	-2.195010473	1.71E-110	1.202612701	9.71E-32	no	no	no	yes
Abcc9	13.56114501	5.325859192	6.912198861	7.429267566	-1.640119287	1.31E-43	0.480339915	0.053912248	no	no	yes	no
Abcd1	11.83147098	3.811929251	8.198625769	3.439138908	-1.964712303	2.26E-63	1.233902658	1.23E-15	no	no	no	yes
Abcd2	33.81416864	16.41334936	34.83972707	17.16248599	-1.319497725	3.54E-08	1.159134515	9.66E-17	no	no	no	yes
Abcd3	113.6985832	40.19119862	71.14513988	50.44563933	-1.7294006	1.08E-103	0.843357966	3.35E-22	no	no	yes	no
Abcd4	8.357940042	24.89227468	11.92131102	14.03467807	1.29599787	6.79E-33	-0.959760252	2.87E-05	yes	no	no	no
Abce1	42.49726082	61.55678737	38.41536085	67.79179251	0.513302597	0.000270641	-0.844768119	3.12E-07	no	no	no	no
Abcf1	56.03627537	77.42910802	47.75645377	75.28607745	0.350363777	0.00065974	-0.785163359	2.92E-10	no	no	no	no
Abcf2	40.52651499	62.52207745	30.34027342	58.80632114	0.486769783	7.02E-06	-1.09203126	1.06E-19	no	yes	no	no
Abcf3	43.7014024	31.96961823	36.49242928	30.10267375	-0.756103444	7.61E-27	0.291829159	0.000114496	no	no	no	no
Abcg1	5.793658176	19.63215194	18.5472556	22.17891151	1.499331667	1.26E-38	-0.001259521	0.993351031	yes	no	no	no
Abcg2	31.59250129	25.05620693	24.01166076	28.41768625	-0.524398577	0.006868903	-0.077772845	0.749003636	no	no	no	no
Abcg3	3.293266198	15.12962076	12.29693806	9.523203543	1.918448506	1.34E-48	-0.217268058	0.240222137	yes	no	no	no
Abcg5	62.26733676	8.661952817	23.42486241	8.81466125	-3.1626279	2.31E-50	1.496456863	1.26E-05	no	no	no	yes
Abcg8	54.75625851	4.096682726	14.30182248	4.997881862	-4.039679942	6.15E-88	1.812826126	8.56E-07	no	no	no	yes
Abhd1	4.427079965	0.942800419	1.942570426	1.173723638	-2.450883204	2.59E-45	1.074110555	0.000363929	no	no	no	yes
Abhd10	5.295103183	16.2070035	8.760462738	15.81249677	1.338224777	5.83E-68	-0.803388411	7.42E-26	yes	no	no	no
Abhd11	29.19366144	28.43966606	19.23108448	24.83762054	-0.288534764	2.93E-06	-0.515699072	4.13E-09	no	no	no	no
Abhd12	24.93973495	29.15207067	27.8885048	28.5410889	-0.040228665	0.619830432	0.003253929	0.983679629	no	no	no	no
Abhd13	25.4327759	24.32213661	30.49226149	29.96961123	-0.34143572	7.04E-05	0.404393825	1.22E-06	no	no	no	no
Abhd14a	7.412146016	34.98117415	12.95826083	35.61356565	1.94681523	6.29E-127	-1.352206855	2.13E-40	no	yes	no	no
Abhd14b	102.823873	48.14482864	69.69686247	57.07331604	-1.34259253	4.43E-115	0.570856946	7.24E-13	no	no	yes	no
Abhd15	49.00133029	9.004762598	6.998863694	13.89595004	-2.772916778	2.16E-206	-0.232550778	0.312927405	no	no	yes	no
Abhd16a	40.01394836	27.93048631	34.63438584	22.27667919	-0.805298276	8.31E-21	0.391913727	3.61E-05	no	no	no	no
Abhd17a	41.37520213	33.8666998	33.08108921	33.49494113	-0.559118768	2.62E-16	0.050531683	0.623729429	no	no	no	no
Abhd17b	23.60165508	22.32044159	22.53061663	24.68532935	-0.37392327	0.003578797	0.107107718	0.194310258	no	no	no	no
Abhd17c	54.29475433	50.85319671	43.11233271	52.55222387	-0.306578524	3.43E-06	-0.239779304	0.007230083	no	no	no	no
Abhd2	44.51156193	16.7939189	43.89383539	26.25651903	-1.645297093	1.63E-49	1.406230441	5.56E-32	no	no	no	yes
Abhd3	48.95170329	7.104272693	27.90494653	18.06875555	-3.147623385	5.35E-192	2.118630349	3.27E-48	no	no	no	yes
Abhd4	28.95742055	14.96677449	30.00039099	13.82673729	-1.266023171	3.15E-84	1.112993224	6.71E-83	no	no	no	yes
Abhd5	27.17409093	14.82236519	26.30567539	17.16108896	-1.170942026	3.46E-29	0.927835501	5.28E-21	no	no	yes	no
Abhd6	31.1114669	12.33508217	12.34654865	12.66932227	-1.658093006	5.93E-57	0.135923981	0.420450357	no	no	yes	no
Abhd8	5.452341616	8.496436495	6.715419437	8.485164604	0.291686466	0.035525815	-0.193280383	0.106888504	no	no	no	no
Abi1	27.50491568	25.81000602	34.06640048	28.37194818	-0.363430004	1.39E-05	0.464920363	5.35E-31	no	no	no	no
Abi2	10.83738367	21.63333778	18.74578737	20.96945642	0.673018075	7.30E-10	-0.091449673	0.274953933	no	no	no	no
Abi3bp	4.025245287	1.03303452	1.422144285	0.999640501	-2.248858895	3.51E-35	0.589310468	0.016956858	no	no	yes	no
Abl1	15.58750861	30.20450871	25.2715927	27.69085875	0.67506026	6.22E-32	-0.174623596	0.033584357	no	no	no	no
Abl2	6.409739939	29.25632583	14.25950459	29.84837892	1.891347647	2.72E-192	-0.935910479	1.01E-31	yes	no	no	no
Ablim1	14.27896611	8.112194379	18.72431694	9.933935754	-1.130968558	1.61E-30	1.319026726	5.64E-51	no	no	no	yes
Ablim3	13.91097218	0.172617292	0.209117307	0.626173212	-6.535619598	7.98E-38	0.369632029	0.608411692	no	no	yes	no
Abr	2.463185218	5.38336154	5.595240651	5.169500913	0.774637803	8.00E-12	0.223261437	0.137672332	no	no	no	no
Abracl	13.77492198	17.0376235	34.10374149	18.81925896	0.038487532	0.75704858	1.07734512	1.98E-27	no	no	no	yes
Abt1	10.95044028	14.85440536	10.36047106	13.3555866	0.251414533	0.004983795	-0.526547264	8.91E-07	no	no	no	no
Abtb1	32.15817749	17.53724622	25.99179634	15.55798556	-1.218179151	6.41E-31	0.696077494	3.21E-10	no	no	yes	no
Abtb2	16.75548356	19.61233914	18.02383871	18.44757636	-0.093231762	0.413115902	0.002573961	0.986293183	no	no	no	no
Acaa1a	67.66532519	29.16266052	43.12417053	30.65908333	-1.458190761	6.66E-64	0.607270891	4.42E-10	no	no	yes	no
Acaa1b	115.5211411	27.92893871	40.61989833	38.4236948	-2.289518569	4.90E-48	0.546506913	0.007212096	no	no	yes	no
Acaa2	132.1229711	82.91447903	106.4675955	84.16652532	-0.586284675	0.006427661	0.058461715	0.852940599	no	no	no	no
Acaca	41.79407993	40.40398898	32.88358104	45.84823397	-0.21488672	0.066878167	-0.327508043	0.010837209	no	no	no	no
Acacb	27.6605484	3.912913148	14.4976954	7.528787779	-3.210054076	2.57E-65	2.020349641	1.58E-15	no	no	no	yes
Acad10	11.72128717	5.982482466	8.020749609	6.190606471	-1.239623743	9.58E-30	0.514923109	0.000669319	no	no	yes	no
Acad11	94.64720744	33.7161976	69.20112697	44.26790606	-1.72422139	8.00E-48	1.055287464	3.98E-14	no	no	no	yes
Acad12	4.658349649	2.634672985	3.846029461	2.936884056	-1.103175064	4.87E-34	0.628865381	0.000150463	no	no	yes	no
Acad8	37.05124016	27.41445437	27.63311067	26.82546778	-0.66946394	3.14E-15	0.044052313	0.733091949	no	no	no	no
Acad9	36.95836235	35.94040413	32.49007752	33.24268662	-0.143828167	0.200416422	-0.252621644	0.06117435	no	no	no	no
Acadl	66.76643221	40.20853886	55.98118295	44.78194117	-0.851791963	1.78E-11	0.396629594	0.010815008	no	no	no	no
Acadm	105.117857	77.88665805	113.4519253	84.66564494	-0.418673167	0.010983561	0.316417351	0.147599713	no	no	no	no
Acads	96.94727298	58.99676141	76.99274169	64.69184263	-0.939541977	2.86E-34	0.388224963	9.88E-05	no	no	no	no
Acadsb	60.98832413	20.76608749	40.29134126	21.78678508	-1.845651826	5.06E-154	1.039177984	1.08E-37	no	no	no	yes
Acadvl	82.87194663	43.12316451	66.6948875	47.33292732	-1.138377716	6.15E-32	0.603829913	5.33E-07	no	no	yes	no
Acap2	21.15939054	22.29549538	28.90932304	27.37821034	-0.234236231	3.26E-05	0.481816776	3.87E-21	no	no	no	no
Acap3	4.870314282	5.82777074	5.405477356	5.524053248	-0.093602848	0.435372361	0.044726503	0.788844912	no	no	no	no
Acat1	67.74148338	50.69516378	62.95143089	52.29420021	-0.432699467	0.008146592	0.127179996	0.59322925	no	no	no	no
Acat2	33.34564419	27.8356727	42.15035309	37.18877184	-0.505278476	6.70E-09	0.631639045	4.49E-09	no	no	no	no
Acat3	36.78132286	6.25988485	24.53904561	10.80537289	-2.848861473	4.73E-65	2.038001229	1.46E-23	no	no	no	yes
Acbd3	21.93024318	27.85997705	38.75523472	29.74378533	0.057121637	0.291021075	0.579139696	8.81E-30	no	no	no	no
Acbd4	25.38579683	11.67006374	22.97372859	11.93325877	-1.456724562	6.85E-50	1.098305194	4.88E-19	no	no	no	yes
Acbd5	87.34170608	26.91080226	54.07417354	31.61791513	-1.966328304	6.71E-131	1.065901882	3.00E-36	no	no	no	yes
Acbd6	14.16109555	24.2253167	12.58972641	22.96792311	0.473067635	4.45E-08	-0.84513749	4.16E-16	no	no	no	no
Acbd7	0.044450134	4.869345445	4.560988033	3.934147105	5.695499314	2.64E-12	0.145275307	0.724636869	yes	no	no	no
Acd	6.893374055	7.285970632	8.89998672	7.574245013	-0.256766155	0.016436962	0.414116971	0.000955448	no	no	no	no
Ace	0.357937907	3.123218884	5.347806472	8.016193965	2.823800117	1.44E-45	0.832404287	0.00312572	yes	no	no	no
Acer2	9.768277121	7.841651333	6.733703939	7.34632011	-0.653243884	3.78E-07	-0.082447948	0.713444566	no	no	no	no
Acer3	15.67668182	16.38514142	12.88527653	14.65911087	-0.250012906	0.044742357	-0.229660379	0.017395834	no	no	no	no
Acin1	26.78945231	43.62466501	34.38422146	39.5816076	0.464000824	2.78E-25	-0.316301072	1.38E-08	no	no	no	no
Ackr2	3.764108773	0.705131598	1.786449743	0.653768334	-2.74976854	1.30E-31	1.421403425	7.63E-05	no	no	no	yes
Ackr4	11.8915519	2.805151591	7.95527825	4.31364391	-2.383633199	4.66E-65	1.588294325	3.46E-19	no	no	no	yes
Acly	77.5003574	60.941123	71.28197598	71.27400355	-0.437050202	0.001653724	0.122277454	0.497170762	no	no	no	no
Acmsd	22.85621127	3.341429907	6.935184988	3.38432654	-3.051952432	3.96E-56	1.115028568	0.000791021	no	no	no	yes
Acn9	20.85228814	21.96389985	14.44948885	22.02466048	-0.176383574	0.176123373	-0.545091075	1.74E-05	no	no	no	no
Acnat1	100.188491	10.83655761	40.48613437	12.33541641	-3.555787592	2.52E-105	2.00324102	2.01E-22	no	no	no	yes
Acnat2	74.39898148	2.501204841	9.762945775	5.067899016	-5.207519148	1.51E-34	1.934239593	1.25E-05	no	no	no	yes
Aco1	67.60999724	50.51122444	54.14780239	46.71594769	-0.497698357	0.000300128	-0.018332778	0.932882952	no	no	no	no
Aco2	74.39608635	81.83111299	84.00865244	81.06243227	0.135620959	0.398211808	-0.167707243	0.433731409	no	no	no	no
Acot1	11.80914771	24.22432955	34.41708423	30.07407283	0.80598202	1.18E-06	0.510462139	0.000391748	no	no	no	no
Acot11	10.34374911	0.829790705	1.834253796	0.788662814	-3.867758025	1.52E-129	1.202663057	9.23E-16	no	no	no	yes
Acot12	62.49462835	24.41144596	26.2540492	22.86512836	-1.600427696	1.78E-82	0.140101805	0.286634926	no	no	yes	no
Acot13	59.09502583	44.39159921	58.4938778	46.91575608	-0.603668085	1.48E-08	0.389964518	0.006748373	no	no	no	no
Acot2	10.50737827	19.33051316	40.30615092	23.98023753	0.542408921	0.007029662	1.162561881	2.38E-29	no	no	no	yes
Acot3	34.09075028	21.34792961	47.11001481	19.77620618	-0.99851016	0.029048481	1.240883967	1.25E-10	no	no	no	yes
Acot4	48.62318606	28.9382499	46.11465553	34.83870735	-1.080827379	2.64E-10	0.77241637	7.28E-17	no	no	yes	no
Acot6	1.452356835	4.524443626	4.673121116	5.33579335	1.273738509	1.69E-16	0.195204196	0.512627646	yes	no	no	no
Acot7	11.79900529	27.70246886	7.739305341	19.36328254	1.032609002	2.72E-18	-1.822173499	3.16E-21	no	yes	no	no
Acot8	14.98723121	15.78137202	26.83093319	14.81717366	-0.17514306	0.018153691	0.848249992	0.001171774	no	no	no	no
Acot9	3.649546167	8.063525953	12.84218529	8.727972318	0.87499675	1.42E-08	0.735390711	0.000152137	no	no	no	no
Acox1	168.0667708	51.47185619	89.68341009	65.69062577	-1.922196187	1.12E-119	0.797121312	5.62E-17	no	no	yes	no
Acox2	84.99005114	33.14935976	75.7792629	32.90498022	-1.588021743	1.31E-23	1.200048007	3.41E-10	no	no	no	yes
Acox3	22.12590379	5.345759584	8.674860312	5.518578082	-2.357649395	3.24E-184	0.802894157	8.49E-20	no	no	yes	no
Acp1	38.20513055	40.23446506	34.78401282	38.71638319	-0.058611514	0.535793499	-0.284273457	0.01298244	no	no	no	no
Acp2	35.4582231	20.99166072	27.94287211	19.41348922	-1.065038954	4.50E-111	0.5156387	9.24E-22	no	no	yes	no
Acp5	93.31134313	46.35716432	53.7244063	49.33489562	-1.266764907	3.55E-55	0.245580817	0.052378441	no	no	yes	no
Acp6	34.41495555	39.69245603	29.44123542	37.15837293	-0.033319453	0.674387165	-0.378905285	1.54E-05	no	no	no	no
Acsf2	69.07520179	12.16208989	23.22171971	22.66980274	-2.827428765	5.98E-88	1.041711371	7.93E-06	no	no	no	yes
Acsf3	18.73592375	13.07575881	13.68771049	12.69293502	-0.795024559	8.30E-28	0.143774252	0.076530351	no	no	no	no
Acsl1	142.6585623	85.19065346	121.1701319	94.00558439	-0.766897462	5.04E-08	0.320179381	0.094218322	no	no	no	no
Acsl3	14.92806235	30.64559596	28.50755194	36.15669305	0.892887875	2.25E-12	-0.124289083	0.408476486	no	no	no	no
Acsl4	42.44355999	20.91466539	41.23957029	26.48681339	-1.332903439	2.45E-35	1.088286669	3.30E-31	no	no	no	yes
Acsl5	66.79359943	45.9284182	48.89343662	49.64707071	-0.626532452	1.86E-06	-0.016162974	0.941170803	no	no	no	no
Acsm1	109.0737556	10.67870508	58.70599726	16.7268314	-3.684303157	7.60E-64	2.532161749	7.89E-23	no	no	no	yes
Acsm2	3.386858536	0.186579226	0.26688855	0.260901682	-4.34577621	4.59E-38	0.563284031	0.08280957	no	no	yes	no
Acsm3	38.52965037	11.62509434	31.35137142	23.90063335	-1.993626947	6.15E-48	1.486729571	5.11E-15	no	no	no	yes
Acsm5	88.75892137	6.182242172	22.54569701	6.726950477	-4.103724265	1.40E-60	1.831276612	3.74E-07	no	no	no	yes
Acss1	0.564589703	58.92727304	69.20021437	58.23469625	6.58694793	0	0.213303336	0.178610806	yes	no	no	no
Acss2	28.11850717	3.534530725	9.569960307	3.426112609	-3.315571921	5.58E-136	1.550797253	4.37E-17	no	no	no	yes
Acss3	25.78267029	1.369833719	3.754988777	1.212281498	-4.423163493	6.65E-137	1.374922879	1.67E-06	no	no	no	yes
Acta2	0.733241113	13.03844127	8.060131578	8.280500629	4.004254765	1.99E-59	-0.634044278	0.010638507	yes	no	no	no
Actb	175.858086	141.2010912	200.3425384	164.5131577	0.076371954	0.799899242	-0.103828942	0.796234515	no	no	no	no
Actg1	69.7264231	101.7114292	127.6222721	116.4565182	0.809246359	0.000764587	0.089165653	0.723419625	no	no	no	no
Actl6a	22.10566194	40.91959781	21.87018313	37.61739273	0.691339349	2.93E-12	-0.855484635	1.09E-12	no	no	no	no
Actn1	16.99099523	22.58793137	20.11089733	21.11037145	0.158753852	0.095089535	-0.076162721	0.649753725	no	no	no	no
Actn4	52.60461189	57.16429383	61.55243766	60.85807964	-0.035533583	0.708778572	0.062829734	0.640083799	no	no	no	no
Actr10	12.288022	14.20274549	14.07066434	14.58985219	0.010131022	0.936927471	0.014295253	0.935683963	no	no	no	no
Actr1a	50.00143864	48.27649623	52.95553999	47.91249902	-0.285496882	9.52E-05	0.169102947	0.051623336	no	no	no	no
Actr1b	51.46237053	48.45269253	45.71810655	48.57873911	-0.327345735	5.57E-08	-0.05747852	0.551709094	no	no	no	no
Actr2	47.86215055	41.99680801	45.01854814	43.77350144	-0.336111574	0.000104973	0.043422946	0.69962256	no	no	no	no
Actr3	45.10177315	65.04385479	71.20258775	70.2328303	0.429860887	0.000135704	0.014965493	0.934683394	no	no	no	no
Actr5	7.938161919	13.40157846	6.455314986	10.86330026	0.427514819	4.58E-06	-0.915398485	4.07E-26	no	no	no	no
Actr6	14.3826647	27.99745418	18.8479282	31.63013637	0.731541084	6.35E-11	-0.542527441	1.28E-05	no	no	no	no
Actr8	23.80789705	29.04985721	21.19659408	26.6125547	0.014579039	0.901721011	-0.394646987	0.000938936	no	no	no	no
Acvr1	15.91849102	12.88673073	13.90100561	15.16424463	-0.610263027	7.18E-20	0.238455594	0.002197626	no	no	no	no
Acvr1b	13.93936042	19.70737206	22.65308319	20.08228408	0.197969797	0.006139278	0.30084843	0.000631151	no	no	no	no
Acvr2a	28.34269883	19.2119024	23.409884	21.91626231	-0.87575569	4.93E-18	0.395500583	1.23E-06	no	no	no	no
Acvr2b	4.825058038	28.13351454	10.84217132	22.00401361	2.228312686	9.01E-77	-1.277183293	7.99E-38	no	yes	no	no
Acvrl1	4.208599709	4.429292308	4.889968023	4.232973315	-0.255997871	0.039409042	0.259924128	0.060785935	no	no	no	no
Acy1	53.07902838	60.69283733	45.15673126	60.92048049	-0.024487991	0.806302861	-0.413786853	0.001548445	no	no	no	no
Acy3	59.23833144	9.250344993	19.02230296	14.64620003	-2.97955255	9.27E-175	1.13886166	2.80E-11	no	no	no	yes
Acyp1	11.48264716	11.1549278	10.42308613	11.01606771	-0.392515019	0.002618482	0.034028686	0.872643379	no	no	no	no
Acyp2	4.102551468	2.025744526	1.545487615	1.365670132	-1.312556592	4.81E-07	-0.246139632	0.564797549	no	no	yes	no
Ada	2.553410932	5.051645338	10.08298326	4.36902386	0.738428908	2.72E-08	-0.219725188	0.36963549	no	no	no	no
Adal	11.17306282	6.454298806	9.095672318	7.064426865	-1.089241928	2.72E-45	0.60684082	1.03E-10	no	no	yes	no
Adam10	20.23820057	38.16309369	33.79380793	37.74233655	0.723194253	3.73E-15	-0.171510082	0.123867273	no	no	no	no
Adam11	5.145203706	3.338286078	2.066980434	2.631355125	-0.939161825	0.001156037	-0.549274049	0.14733513	no	no	no	no
Adam12	1.858060713	3.109757675	3.400938692	2.40810854	0.5352031	5.22E-09	0.165268435	0.186396888	no	no	no	no
Adam15	1.918200741	4.303858757	4.243539115	4.347635147	0.825447679	1.36E-08	0.131867871	0.607944024	no	no	no	no
Adam17	22.66852847	29.57749875	30.51778295	31.68128191	0.135592367	0.012886517	0.096482088	0.181910606	no	no	no	no
Adam19	1.518457346	2.715766184	3.100545861	3.020363783	0.489538659	0.000590935	0.36988508	0.073794684	no	no	no	no
Adam22	0.466645256	3.019055235	1.700736083	0.83127913	2.30979817	1.04E-32	-0.658060368	0.003738894	yes	no	no	no
Adam23	10.08505654	0.847703141	1.564884793	0.474241051	-3.777836592	1.64E-13	0.825407964	0.187421399	no	no	yes	no
Adam4	6.107777606	9.268310703	6.876272424	8.56611755	0.231032763	0.271801252	-0.238057073	0.350424692	no	no	no	no
Adam8	0.392927133	8.820119729	8.421728062	11.76092681	4.044150262	6.46E-49	0.154157274	0.67248738	yes	no	no	no
Adam9	39.21219259	24.55450907	28.05454091	26.0723114	-0.925666454	5.70E-43	0.263346197	0.006457902	no	no	no	no
Adamts1	12.82336682	11.86080732	20.80548246	8.041732786	-0.4248076	0.000101638	0.89987593	1.39E-06	no	no	no	no
Adamts10	2.777708022	1.838283722	3.793395144	1.75984478	-0.883929649	2.30E-09	1.131778479	2.63E-05	no	no	no	yes
Adamts12	0.555044241	6.680617981	4.038426659	3.454382799	3.357630674	2.33E-163	-0.63534255	8.14E-06	yes	no	no	no
Adamts13	15.91999441	4.250204317	15.40622338	4.391079543	-2.145881665	1.65E-53	1.902217617	1.25E-29	no	no	no	yes
Adamts15	0.626001921	1.424146547	4.323348	1.113028041	0.798656049	0.003024531	1.683971933	5.36E-08	no	no	no	yes
Adamts5	3.519383157	5.482154825	5.066143827	3.824387126	0.283318582	0.035898111	0.044196896	0.87076493	no	no	no	no
Adamts6	1.712339202	4.572946881	4.301451577	2.936132252	1.108518313	8.31E-07	0.005101673	0.984546153	yes	no	no	no
Adamts7	9.856840781	1.987322608	3.849781304	3.401149491	-2.604468217	3.54E-31	1.040275207	0.001772179	no	no	no	yes
Adamts9	1.184749449	2.007633158	4.215196776	2.040226398	0.420252012	0.029803064	1.17878737	0.000743364	no	no	no	yes
Adamtsl2	5.605412829	5.05827612	5.524251758	5.055923881	-0.490091474	0.057507725	0.284382224	0.475916972	no	no	no	no
Adap1	0.776212523	29.42337197	14.92015537	27.36557841	4.909648824	2.17E-277	-0.875010565	3.00E-12	yes	no	no	no
Adap2	49.78090817	14.64841967	33.56372896	16.11566326	-2.064880756	8.53E-94	1.287169433	2.75E-28	no	no	no	yes
Adar	14.89758046	16.20129527	18.65301925	12.3868237	-0.214669336	0.00074505	0.34239915	0.000195367	no	no	no	no
Adarb1	11.22346504	22.21282463	10.02052295	12.4216932	0.67896385	9.66E-17	-1.039335386	1.77E-10	no	yes	no	no
Adat1	4.058791739	15.04366389	4.777490045	12.13316344	1.605606928	4.22E-89	-1.548996743	5.78E-28	no	yes	no	no
Adat2	4.495873396	12.46837309	4.534202256	9.541507122	1.212918883	3.42E-19	-1.395320547	7.95E-20	no	yes	no	no
Adat3	2.352903234	9.408052093	4.450862946	7.69152012	1.607425233	2.65E-23	-0.884698419	3.56E-06	yes	no	no	no
Adck1	16.61316787	13.01431173	8.663911483	10.52453116	-0.627125815	9.65E-08	-0.47435506	0.000713586	no	no	no	no
Adck2	6.645262695	4.399505533	4.677534884	4.476674062	-0.906341701	5.13E-17	0.233322501	0.05777318	no	no	no	no
Adck3	76.49958761	39.84112392	47.29982159	35.98037284	-1.190852847	3.44E-48	0.281829344	0.08841418	no	no	yes	no
Adck4	14.32250382	12.17045734	16.53094044	11.0465879	-0.531993131	4.06E-05	0.569097283	6.99E-07	no	no	no	no
Adck5	29.71323765	21.98232907	18.85072298	20.68646125	-0.769266478	2.28E-08	-0.089889765	0.58066394	no	no	no	no
Adcy1	0.271693532	1.619020765	4.154244266	0.374973602	2.08358551	2.06E-09	1.511072123	4.47E-05	yes	no	no	yes
Adcy3	1.497768401	3.440614249	2.76638342	3.470616276	0.933607177	1.82E-09	-0.213773281	0.305065456	no	no	no	no
Adcy6	17.61798679	25.6331837	21.28736722	21.89523883	0.22345051	0.020170884	-0.154281972	0.09236414	no	no	no	no
Adcy7	3.719455202	8.670412403	10.02026164	8.608206748	0.920153529	2.01E-18	0.320322294	0.032449312	no	no	no	no
Adcy9	25.66140726	6.994155049	6.783070338	7.896571935	-2.200760632	6.92E-100	0.083018819	0.631437797	no	no	yes	no
Add1	26.9159168	39.99692789	50.44086169	41.37206672	0.337436357	7.35E-09	0.361209592	1.31E-06	no	no	no	no
Add2	0.014710707	4.629298784	3.468080748	2.238335647	7.434948633	1.76E-27	-0.262579494	0.654430378	yes	no	no	no
Add3	10.30729779	43.38807134	35.21907769	34.00911503	1.861130762	2.12E-183	-0.285751676	0.20048313	yes	no	no	no
Adh1	148.9990976	46.02559319	82.58304587	47.19962808	-1.898466742	7.76E-26	0.810860968	0.000176082	no	no	yes	no
Adh4	97.55813515	8.702854191	12.16203626	11.00097203	-3.671727525	1.80E-77	0.470744773	0.180416977	no	no	yes	no
Adh5	115.2132992	84.53841075	93.53169868	84.38377312	-0.40946963	0.017618117	-0.100371973	0.688512587	no	no	no	no
Adh7	41.6698382	0.950471025	3.298696377	1.87185936	-5.616156809	8.26E-177	1.694068673	1.20E-06	no	no	no	yes
Adhfe1	37.57253098	17.61735245	28.23972603	13.25958759	-1.332037232	2.86E-79	0.711116523	2.46E-11	no	no	yes	no
Adi1	68.01822351	48.52877779	49.58180897	50.65745464	-0.680168976	3.95E-23	0.008463112	0.942322294	no	no	no	no
Adipor1	62.70998324	53.48990479	58.29949122	53.86880756	-0.404047109	2.84E-05	0.08886056	0.513414213	no	no	no	no
Adipor2	94.67675141	35.88216148	55.29738105	46.17447584	-1.660207887	1.21E-181	0.667747123	2.03E-15	no	no	yes	no
Adk	79.53317053	48.00858412	60.54887582	50.93878977	-0.811446802	7.38E-11	0.211269558	0.160537906	no	no	no	no
Adm	2.096833187	1.715689642	2.420667958	3.131171296	-0.607225205	0.000185602	0.597494015	0.029798586	no	no	no	no
Adnp	37.07444883	48.34768093	51.89203221	49.41713506	0.174097267	0.028357276	0.100402221	0.444277957	no	no	no	no
Adnp2	9.44250135	18.70592731	13.33068306	16.53110609	0.665343408	5.86E-11	-0.3596973	0.000950105	no	no	no	no
Ado	20.22002473	36.52095236	21.20045884	34.43680986	0.576538136	1.89E-20	-0.708076323	2.92E-23	no	no	no	no
Adora1	14.22608726	4.045587171	3.433726822	4.108329808	-2.167202407	2.67E-23	-0.072459268	0.844700842	no	no	yes	no
Adpgk	8.991371532	20.61348604	7.810791387	17.94567493	0.938336493	1.53E-61	-1.330808652	5.68E-50	no	yes	no	no
Adprh	6.907898857	29.39813457	23.96464094	29.14376451	1.741148139	1.15E-70	-0.144695922	0.377187688	yes	no	no	no
Adprhl2	25.58967534	56.45004121	39.6305022	51.23312054	0.900853693	5.52E-16	-0.479259717	9.37E-08	no	no	no	no
Adprm	29.74953249	12.27025034	19.54431664	13.80542163	-1.563714737	2.73E-111	0.762593684	5.90E-31	no	no	yes	no
Adra1a	3.685963159	0.167301437	0.299517495	0.334611632	-4.780400213	1.15E-237	0.358972553	0.209286887	no	no	yes	no
Adra1b	40.64338478	0.51172005	7.596313229	2.525905887	-6.735216587	8.92E-79	3.757085549	2.41E-17	no	no	no	yes
Adra2b	7.71823439	1.14944145	3.211144084	1.318308788	-3.034472903	5.94E-22	1.460004461	0.000308246	no	no	no	yes
Adrb2	2.385275036	5.159234394	6.859119569	2.550189234	0.716149022	3.15E-05	0.595156675	0.008243444	no	no	no	no
Adrbk1	20.11299054	27.6996326	22.66368646	28.90626424	0.176671633	0.001526173	-0.201496688	0.011488745	no	no	no	no
Adrbk2	5.577606899	13.94110144	15.46048953	8.393333486	0.969114846	9.88E-15	0.310228268	0.042659521	no	no	no	no
Adrm1	56.77500526	52.71071983	37.67118947	48.78942	-0.337124506	1.10E-05	-0.464241274	0.001008341	no	no	no	no
Adsl	20.04092447	62.06631671	22.23211095	57.56993385	1.547823852	8.79E-36	-1.570702353	1.55E-29	no	yes	no	no
Adss	25.08858172	42.87077907	29.94587248	40.55843023	0.614336394	9.26E-14	-0.555640457	2.65E-07	no	no	no	no
Adssl1	16.39686515	4.597889552	8.816903877	7.315992332	-2.141481956	1.88E-39	1.059828489	0.000109694	no	no	no	yes
Adtrp	49.28293889	9.287958462	21.5801144	13.43009626	-2.724792796	1.13E-117	1.327754983	5.86E-16	no	no	no	yes
Aebp1	1.978661876	3.885390473	4.586696433	4.004850245	0.647431587	0.007602886	0.370192302	0.238485718	no	no	no	no
Aebp2	9.474792213	26.45756173	18.31926452	27.5983227	1.233712745	2.30E-63	-0.470835789	2.55E-06	yes	no	no	no
Aen	22.66006734	44.95185769	21.32248448	44.10137478	0.758803162	5.43E-18	-1.04378618	6.36E-20	no	yes	no	no
Aes	109.6104468	62.07866694	81.33102933	67.25151389	-0.966634664	1.05E-26	0.317995243	0.010988391	no	no	no	no
Afap1	1.337866699	2.148243914	4.861001993	3.659278972	0.332369507	0.026241788	1.282552373	3.24E-05	no	no	no	yes
Afap1l1	3.800958095	3.068852651	4.075807062	4.827178442	-0.546828494	0.001916621	0.525743078	0.062939927	no	no	no	no
Aff1	17.3844383	11.32325579	14.64764505	8.222367555	-0.946566706	1.31E-13	0.502369571	0.007310242	no	no	no	no
Aff2	0.275770531	4.864763981	5.605029613	1.354057427	3.810967722	4.65E-138	0.300751021	0.50522763	yes	no	no	no
Aff4	36.71713448	29.04058485	40.27631168	31.73069628	-0.606447524	2.01E-22	0.536228916	4.26E-26	no	no	no	no
Afg3l1	27.51518924	25.54326042	19.56194995	24.02347555	-0.371934636	1.33E-09	-0.314974132	0.000230949	no	no	no	no
Afg3l2	29.76499836	34.20782214	21.05934158	33.38870234	0.028982476	0.757738579	-0.748034352	8.61E-09	no	no	no	no
Afm	84.49680661	33.69461688	68.18495933	30.19682366	-1.561619656	2.42E-88	1.037056643	1.33E-22	no	no	no	yes
Afmid	70.32477215	8.692467306	16.86962651	9.518652534	-3.355551552	6.47E-214	1.078865382	4.02E-12	no	no	no	yes
Afp	12.83003089	105.4946709	185.8910856	134.784484	3.367856033	6.63E-35	0.222114196	0.576230684	yes	no	no	no
Aftph	30.65187042	24.63526069	27.81866783	26.98985596	-0.599002796	2.08E-36	0.257688716	4.04E-06	no	no	no	no
Aga	7.801099182	7.246353637	8.4684766	7.579211989	-0.310126766	0.008341922	0.263711863	0.111283372	no	no	no	no
Agap1	6.550141156	14.01997162	10.75158396	14.41822387	0.779789691	9.11E-24	-0.253835365	0.008755836	no	no	no	no
Agap3	18.75943436	30.72911429	17.65666281	27.87826444	0.42245358	3.55E-12	-0.699095273	5.62E-18	no	no	no	no
Agbl5	5.586169386	8.875380077	14.0686149	10.34762556	0.332737191	0.002017801	0.790130614	8.88E-12	no	no	no	no
Agfg1	17.31704935	44.45022986	36.67053901	40.21341405	1.163197061	3.02E-43	-0.270627558	0.002366744	yes	no	no	no
Agfg2	22.99522016	11.0605519	13.96883782	10.98110737	-1.352904336	2.36E-47	0.443903504	0.000652307	no	no	yes	no
Aggf1	21.18264052	29.96778048	18.51099173	28.9297823	0.264961418	6.44E-05	-0.646127246	1.48E-15	no	no	no	no
Agk	5.28114534	17.456967	6.706911546	16.66900549	1.494657076	2.79E-67	-1.332538383	2.31E-32	no	yes	no	no
Agl	21.29118873	12.07961672	18.40625084	14.37538423	-1.096212537	4.18E-48	0.695348033	1.31E-11	no	no	yes	no
Agmat	97.01777457	60.28269265	43.8566597	60.17941488	-0.821200977	3.23E-12	-0.533703906	0.000697759	no	no	no	no
Agmo	33.916481	4.083124419	15.83960125	5.667737449	-3.320777495	4.60E-91	1.990087423	7.81E-24	no	no	no	yes
Ago1	19.23694611	31.83915349	24.15136808	24.27834606	0.438057151	2.98E-10	-0.304559352	0.047691609	no	no	no	no
Ago2	16.52509655	46.11069113	30.95709975	40.00628498	1.258820208	1.12E-50	-0.544075906	5.18E-07	yes	no	no	no
Ago3	8.442349173	11.02371607	9.640437988	8.74042342	0.05719176	0.518574306	-0.065567681	0.541156647	no	no	no	no
Ago4	4.445220904	1.791564667	3.923940393	1.471047657	-1.563485211	7.44E-57	1.194174137	7.15E-18	no	no	no	yes
Agpat1	13.19838497	29.80282601	26.53240015	31.13967692	0.870502412	1.41E-22	-0.060216683	0.506341072	no	no	no	no
Agpat2	82.27912703	43.20668791	63.92686643	55.195157	-1.170903892	2.03E-56	0.615045711	2.89E-11	no	no	yes	no
Agpat3	59.16930336	33.61901871	36.44367733	31.93813388	-1.086479465	6.30E-120	0.184655049	0.042440923	no	no	yes	no
Agpat4	1.962908721	4.003559182	6.907644642	4.315440287	0.710935028	4.43E-05	0.940059737	6.46E-05	no	no	no	no
Agpat5	7.006151016	27.26396346	8.153794708	29.5999658	1.715537366	1.86E-154	-1.693208323	1.30E-112	no	yes	no	no
Agpat6	62.16354227	37.79786114	36.72445533	39.47743722	-0.948848667	3.17E-50	-0.023120957	0.839724087	no	no	no	no
Agpat9	21.95622844	2.32300528	11.64220267	7.213295481	-3.532705338	7.25E-129	2.369785922	2.00E-27	no	no	no	yes
Agps	9.431278146	32.35480859	22.44913806	30.39202971	1.556875948	2.73E-103	-0.500552119	3.23E-13	yes	no	no	no
Agrn	24.59644139	29.53464112	52.35385515	33.65584911	-0.045122159	0.650660375	0.924889989	5.82E-17	no	no	no	no
Agt	154.9456881	67.22985611	140.1642301	94.95371874	-1.413625246	1.38E-51	1.043485793	3.98E-19	no	no	no	yes
Agtpbp1	5.800881906	17.03801381	10.32811821	15.72763816	1.295053172	1.62E-73	-0.658707026	9.79E-08	yes	no	no	no
Agtr1a	53.93813138	27.14479411	47.40999581	21.56708436	-1.275756791	3.18E-55	0.887920843	4.41E-16	no	no	yes	no
Agtrap	5.13021232	12.80149089	18.11674116	14.3570555	0.986279889	6.84E-19	0.627923764	2.48E-06	no	no	no	no
Agxt	121.6925625	8.080396096	19.81673462	9.699721695	-4.177216385	1.59E-62	1.304089206	1.58E-05	no	no	no	yes
Agxt2	63.64449844	11.3389318	29.88335159	11.41803247	-2.757281805	5.18E-152	1.464950302	7.89E-24	no	no	no	yes
Ahctf1	32.50083897	60.61524609	40.17712589	59.18164603	0.781580516	3.36E-17	-0.664862752	7.42E-10	no	no	no	no
Ahcy	161.4557694	93.79954766	85.97992041	98.09321562	-0.67743146	0.00044375	-0.438711646	0.066736852	no	no	no	no
Ahcyl1	50.37648324	53.82869686	48.91316747	50.166447	-0.067520414	0.427787365	-0.16569409	0.250879366	no	no	no	no
Ahcyl2	7.674550644	7.315043547	6.136708778	8.367994655	-0.391147986	2.18E-05	-0.134090869	0.165008559	no	no	no	no
Ahdc1	6.692147546	6.034602704	6.927897113	6.020974777	-0.506797876	0.000651899	0.347962409	0.062364143	no	no	no	no
Ahnak	16.28484125	29.17620082	73.09183466	33.13235231	0.526579583	3.03E-05	1.417878965	5.45E-20	no	no	no	yes
Ahr	29.14838398	10.99555888	22.86290952	8.99965326	-1.711108547	9.74E-102	1.164798602	2.51E-43	no	no	no	yes
Ahsa1	79.88201771	92.37341728	61.58331521	102.4001806	0.204649013	0.18004433	-0.774736798	1.15E-05	no	no	no	no
Ahsa2	13.84098551	11.62917275	12.80535319	13.11785882	-0.481465166	4.24E-12	0.166946021	0.094118131	no	no	no	no
Ahsg	221.1157196	102.1892314	195.5950181	136.4237732	-1.051874167	1.27E-07	0.640968488	0.009285132	no	no	yes	no
Aida	10.27594022	18.67794813	15.9608498	16.29297972	0.566622058	1.06E-16	-0.12478015	0.066447547	no	no	no	no
Aif1	9.01197109	15.52062998	20.26032742	14.42535516	0.495014594	0.000332185	0.453383062	0.001833017	no	no	no	no
Aif1l	0.113063063	5.410165953	2.865807701	8.730733372	5.219505531	3.50E-57	-0.765080143	0.001033181	yes	no	no	no
Aifm1	42.81119587	43.01631156	35.46461817	41.54908704	-0.122042228	0.294242551	-0.339644538	0.022791321	no	no	no	no
Aifm2	16.80943469	5.043145831	12.32921785	4.81266343	-2.014132965	5.94E-74	1.377609924	7.05E-09	no	no	no	yes
Aifm3	3.535294127	2.843683641	5.407641111	3.116088663	-0.610540599	3.73E-06	1.032022636	0.00327924	no	no	no	yes
Aig1	4.950813356	5.657482594	5.702829002	6.468249067	-0.129753104	0.314033824	0.145680097	0.529090571	no	no	no	no
Aim1	16.00055992	2.31676369	5.887051469	2.545709798	-3.089967028	2.59E-56	1.385215779	0.000147736	no	no	no	yes
Aim2	2.720416474	3.638018508	3.723815687	2.893111034	0.137828822	0.313539652	0.089040515	0.644035496	no	no	no	no
Aimp1	29.01477725	53.84331246	39.22404997	52.20413053	0.828019265	1.15E-08	-0.535980929	0.002561464	no	no	no	no
Aimp2	21.43349295	54.45464056	22.55740359	54.26002218	1.133937135	2.81E-46	-1.252747714	3.04E-24	no	yes	no	no
Aip	16.74293523	15.75420075	14.08805573	14.69012385	-0.380165702	0.002780977	-0.051501684	0.778778504	no	no	no	no
Ajuba	5.591090603	11.2767682	29.85177996	16.98482397	0.6761338	9.04E-08	1.510749773	3.81E-26	no	no	no	yes
Ak2	99.9900909	99.8424166	75.14674347	100.7116855	0.086846142	0.644678462	-0.69330196	0.001554642	no	no	no	no
Ak3	119.9994503	73.32497939	99.46577765	81.00883857	-0.850259081	1.15E-20	0.365097486	0.002050972	no	no	no	no
Ak4	58.58805974	65.89359158	68.82590965	73.45091257	0.043336975	0.685558858	-0.021544934	0.896704071	no	no	no	no
Akap1	61.87747083	50.53477038	40.53301514	53.1976134	-0.541923606	2.97E-45	-0.289322188	0.000248719	no	no	no	no
Akap10	8.829979895	14.71905665	10.92935158	13.55631099	0.431821465	1.18E-08	-0.330453096	2.21E-05	no	no	no	no
Akap11	31.98192676	41.80000475	43.23976205	38.5354925	0.137128799	0.018441134	0.096901742	0.084183098	no	no	no	no
Akap12	6.586257675	6.33041225	8.865882526	5.373323562	-0.415541794	0.011029138	0.62837527	0.005927128	no	no	no	no
Akap13	30.71616031	23.69351959	30.75692709	23.80513872	-0.679125754	5.46E-23	0.472147887	6.49E-09	no	no	no	no
Akap17b	8.277809485	10.51186213	16.29669599	11.28950325	0.027262006	0.845762014	0.748019767	7.86E-09	no	no	no	no
Akap2	9.503105477	6.135440784	7.804609713	6.379176445	-0.940890895	5.03E-18	0.453468982	0.049089637	no	no	no	no
Akap5	2.367635402	3.202941581	2.355601161	3.011787481	0.102698841	0.604384784	-0.299745639	0.175565753	no	no	no	no
Akap7	4.097549237	6.707495339	6.003612837	5.035326065	0.464605738	2.04E-06	-0.093330727	0.500838826	no	no	no	no
Akap8	25.48189723	51.29148854	29.52768803	46.56993512	0.797948584	7.48E-51	-0.788762121	1.79E-64	no	no	no	no
Akap8l	21.08051426	21.33574522	22.44448352	19.64610313	-0.29782503	0.000203599	0.174093022	0.027986558	no	no	no	no
Akap9	26.50399196	30.50635663	32.10863925	27.07056523	-0.058117891	0.321087853	0.137725693	0.122785179	no	no	no	no
Akip1	19.346749	14.833298	8.973098162	11.53002994	-0.630268515	2.57E-07	-0.686865854	4.87E-06	no	no	no	no
Akirin1	28.69769448	22.5402441	24.4184469	23.57014041	-0.624019751	2.98E-17	0.196184804	0.00338844	no	no	no	no
Akirin2	24.0853792	27.45839283	29.15982401	29.42879728	-0.059537541	0.519750763	0.132997157	0.031462081	no	no	no	no
Akna	1.961768786	3.49364793	3.382539566	2.943972131	0.462735162	0.003926743	0.133460784	0.563830254	no	no	no	no
Akr1a1	53.9520656	44.89493289	53.66245174	44.96582792	-0.241849272	0.180724464	0.030283236	0.912773292	no	no	no	no
Akr1b10	1.283101623	1.948305691	3.841177432	2.02062381	0.259105546	0.16487802	1.095349883	1.10E-06	no	no	no	yes
Akr1b7	0.645278571	8.174775931	52.86843027	6.34378212	3.693333208	2.17E-21	2.662660147	1.96E-17	yes	no	no	yes
Akr1b8	11.30602325	2.578530919	3.532361765	2.363762691	-2.444876949	2.76E-40	0.556986174	0.096879553	no	no	yes	no
Akr1c12	33.69567379	16.09596055	20.88399208	10.76331911	-1.317197852	3.12E-18	0.402487558	0.043860845	no	no	yes	no
Akr1c13	35.96797316	9.52612706	19.49371957	9.185164279	-2.155195306	3.04E-46	1.045460863	2.23E-06	no	no	no	yes
Akr1c14	133.4511908	8.499451791	36.04461684	14.25225803	-4.241322214	4.13E-38	2.035933847	6.82E-08	no	no	no	yes
Akr1c18	0.460896156	0.21448983	1.667141802	11.66988684	-1.122985907	0.005280509	2.443899026	1.01E-07	no	no	no	yes
Akr1c19	56.29679538	36.48516596	59.46489513	29.89719377	-0.898898862	1.36E-16	0.756732954	3.98E-06	no	no	no	no
Akr1c20	61.55130126	1.662590747	8.405354519	3.104808632	-5.306719926	6.52E-29	1.961652406	0.000445512	no	no	no	yes
Akr1c6	134.4553261	7.377702466	23.87525869	10.13378051	-4.293087097	2.28E-12	1.345529465	0.041348624	no	no	yes	no
Akr1d1	82.52274733	33.58900376	72.0570554	53.34185498	-1.555443956	1.73E-20	1.143673621	4.68E-11	no	no	no	yes
Akr1e1	31.81514727	23.92081986	29.68918576	20.09871151	-0.67210485	5.12E-11	0.372566625	0.012861246	no	no	no	no
Akr7a5	61.34820293	31.84310218	35.62832359	35.88268164	-1.215238737	9.67E-37	0.204514794	0.137368681	no	no	yes	no
Akt1	37.7619931	55.4925292	31.04703329	49.68135873	0.375155145	6.64E-05	-0.864211701	6.28E-15	no	no	no	no
Akt1s1	23.57048741	32.39761255	23.98157013	29.40386474	0.166919627	0.069332214	-0.347997969	0.00012701	no	no	no	no
Akt2	49.96346407	39.14610465	34.29953544	38.85396764	-0.614730846	1.89E-35	-0.135203316	0.053004073	no	no	no	no
Akt3	3.92710223	3.784552982	3.668384211	3.12798093	-0.396125042	0.000146463	0.097879061	0.580478022	no	no	no	no
Aktip	12.23893126	11.04964123	15.97196299	13.73974575	-0.452792854	1.20E-06	0.661860532	2.13E-10	no	no	no	no
Alad	90.04797688	60.10239125	50.58298127	61.97205884	-0.683106662	6.98E-08	-0.368954653	0.0151564	no	no	no	no
Alas1	98.82627557	23.08446438	34.09940099	30.22344602	-2.406658747	3.00E-56	0.642049247	3.81E-09	no	no	yes	no
Alas2	23.04664162	44.01986313	43.83417964	34.44698498	0.992831731	0.000521168	-0.256570894	0.506449463	no	no	no	no
Alb	209.1274572	109.959534	194.0560411	134.2872431	-0.418634073	0.251616685	0.089393715	0.858535739	no	no	no	no
Alcam	44.28742502	32.73009652	59.5294331	26.98767139	-0.688096937	2.80E-26	0.909145716	6.87E-44	no	no	no	no
Aldh16a1	37.06640588	35.56492014	34.5338881	28.43572336	-0.340090706	2.87E-05	0.022473633	0.816982792	no	no	no	no
Aldh18a1	1.61398362	44.48982856	18.42907499	36.99568292	4.612589726	3.25E-203	-1.30055787	5.71E-16	no	yes	no	no
Aldh1a1	121.1287384	30.26825817	50.34520909	29.14568978	-2.185119756	6.87E-49	0.68946735	0.000432584	no	no	yes	no
Aldh1a7	58.17908084	54.11160782	62.39216323	31.76468292	-0.233834402	0.077653473	0.129630907	0.563520506	no	no	no	no
Aldh1b1	97.78980901	137.7981634	179.2853516	145.6612757	0.70189307	0.00163556	-0.047219367	0.890348546	no	no	no	no
Aldh1l1	133.3222586	10.474357	52.27819166	22.52431735	-3.913957419	3.08E-27	2.217244216	3.59E-08	no	no	no	yes
Aldh1l2	0.557625828	5.584691635	3.141460875	2.039570522	2.938768306	3.46E-45	-0.628015813	0.066380716	yes	no	no	no
Aldh2	95.64990379	42.41337237	46.2764667	41.7416507	-1.293593697	4.33E-21	0.042256142	0.849316294	no	no	yes	no
Aldh3a2	91.05661021	40.85528785	74.72469755	44.52475309	-1.413384666	1.14E-80	0.916131867	9.91E-23	no	no	yes	no
Aldh3b1	2.299825671	8.866809472	10.32152611	9.842965844	1.589290514	1.95E-33	0.354046181	0.039046795	yes	no	no	no
Aldh4a1	110.5875483	60.99192502	85.64717904	70.92870607	-0.99839562	2.86E-24	0.419577413	0.001954988	no	no	no	no
Aldh5a1	38.85904717	39.24551245	38.87349588	38.57065402	-0.239234296	7.99E-09	0.045507363	0.798745931	no	no	no	no
Aldh6a1	122.3899557	48.08081319	86.20339245	43.94765548	-1.572669428	5.95E-94	0.854586297	6.03E-20	no	no	yes	no
Aldh7a1	75.55528295	42.16515308	50.62369311	44.69997865	-0.966364017	1.85E-17	0.182884838	0.241746329	no	no	no	no
Aldh8a1	121.1811039	55.46688062	80.06157766	55.45206619	-1.317766902	1.43E-49	0.508217578	0.000309401	no	no	yes	no
Aldh9a1	72.75614559	51.74313717	44.76207417	52.19227464	-0.643612924	1.62E-13	-0.26287066	0.013963521	no	no	no	no
Aldoa	66.49046079	110.4966483	106.6136316	121.072475	0.939183731	7.96E-06	-0.454510772	0.096689956	no	no	no	no
Aldob	186.5606721	115.568213	164.2835194	131.868295	-0.411328187	0.106652373	0.009660513	0.98023062	no	no	no	no
Aldoc	20.79145972	5.249046641	20.07659641	7.407622917	-2.287104766	2.07E-46	1.992372553	3.55E-22	no	no	no	yes
Alg1	12.65987564	14.93185988	10.81569021	11.83858606	-0.065885575	0.570544839	-0.305750579	0.033099094	no	no	no	no
Alg10b	37.03266478	53.52549065	39.22968498	48.59457324	0.306983525	2.42E-06	-0.424800981	2.08E-09	no	no	no	no
Alg11	39.37259634	38.17269814	34.57964409	38.43665504	-0.315436831	3.74E-07	-0.058607163	0.613615758	no	no	no	no
Alg12	20.87474623	15.09901619	21.19825398	15.35260695	-0.786467859	2.02E-15	0.619207315	5.19E-09	no	no	no	no
Alg13	3.242001951	17.00152441	5.764885409	17.3667403	2.088003243	5.37E-107	-1.4645731	1.21E-45	no	yes	no	no
Alg14	25.11342068	26.78938163	27.30824879	28.23033017	-0.145333606	0.185664739	0.077190034	0.571902762	no	no	no	no
Alg2	20.32307892	26.71472298	32.28906725	27.02870344	0.086830748	0.555246425	0.388376215	8.22E-07	no	no	no	no
Alg3	16.15164754	18.03815792	7.164381306	18.00527024	-0.120383651	0.215007735	-1.214451639	2.57E-17	no	yes	no	no
Alg5	18.28660342	25.39478787	13.42591761	20.46318689	0.242306508	0.009438014	-0.865845291	2.88E-15	no	no	no	no
Alg6	10.00784691	15.50721002	14.81584619	17.86598696	0.361026554	4.15E-06	0.024084297	0.882163251	no	no	no	no
Alg8	5.855168678	20.79319182	5.665079196	21.57303385	1.578609785	4.53E-47	-1.771165531	3.90E-53	no	yes	no	no
Alg9	15.1998834	20.68278731	12.04962057	20.19978795	0.179864038	0.045013644	-0.690929812	2.56E-09	no	no	no	no
Alkbh1	8.831361578	29.47888617	14.39938526	25.86911398	1.442847483	2.36E-58	-0.923278567	9.09E-21	yes	no	no	no
Alkbh2	10.07978364	10.67274896	8.133130904	10.78384247	-0.187578486	0.154087079	-0.295767727	0.045676978	no	no	no	no
Alkbh3	16.70404689	28.36695368	16.79650811	24.43349867	0.492610566	1.30E-10	-0.661183571	1.61E-07	no	no	no	no
Alkbh4	6.228205875	13.22708385	8.77202967	11.42471902	0.764698746	6.19E-22	-0.449535803	1.02E-05	no	no	no	no
Alkbh5	63.16477439	46.32796779	51.89180962	53.48127964	-0.686101379	7.83E-29	0.189690191	0.026701357	no	no	no	no
Alkbh6	15.98631827	22.11479011	23.39347415	21.7227875	0.152210349	0.255265671	0.19433276	0.17882307	no	no	no	no
Alkbh7	23.22271933	13.50995904	20.82822545	12.47742515	-1.078047727	1.32E-17	0.708976107	9.65E-07	no	no	yes	no
Alkbh8	7.848585199	19.32683855	12.37238402	18.08941002	1.044505798	1.72E-49	-0.572472665	5.80E-08	yes	no	no	no
Alms1	3.344392548	20.39279649	7.460400313	19.44260622	2.28961825	4.18E-193	-1.333938354	1.02E-36	no	yes	no	no
Alox5ap	2.568198521	4.30709265	8.026580028	5.932736237	0.320217323	0.148343895	1.135223006	3.96E-06	no	no	no	yes
Alpl	17.0862228	40.07541005	21.02980713	48.53953722	0.964618821	2.75E-15	-0.871229961	3.83E-11	no	no	no	no
Als2	43.25779757	16.4586614	28.53767371	16.78615473	-1.65725464	3.32E-168	0.854195647	7.33E-28	no	no	yes	no
Als2cl	17.21148678	23.64926473	18.74244598	20.73980396	0.152305434	0.074242641	-0.219200112	0.012659549	no	no	no	no
Alyref	29.54106776	67.03229084	43.9355717	69.90846675	1.181179638	1.04E-16	-0.802088622	3.02E-06	yes	no	no	no
Alyref2	6.636173592	2.720028699	3.296858216	2.657385084	-1.503734866	2.20E-19	0.278245681	0.241561366	no	no	yes	no
Amacr	61.56779638	33.31871936	38.34180664	32.28996274	-1.116968115	5.86E-41	0.218574253	0.020727189	no	no	yes	no
Ambp	164.6377916	115.0012122	158.7926484	138.7496544	-0.225176057	0.399965564	-0.036243007	0.925753565	no	no	no	no
Ambra1	15.20417396	15.86247667	13.97742099	15.47282794	-0.260757964	0.000303245	-0.05440399	0.636683782	no	no	no	no
Amd1	45.06372591	84.58755374	60.91358075	91.95446289	0.875893649	6.08E-11	-0.629568917	1.57E-05	no	no	no	no
Amdhd1	84.23378493	17.26858667	33.22314386	25.08520484	-2.586089061	1.92E-65	1.027060477	1.15E-07	no	no	no	yes
Amdhd2	17.5529664	9.168674636	15.66834759	8.519853309	-1.273473409	8.18E-34	0.896757372	2.87E-10	no	no	yes	no
Amer1	8.61775062	14.7152208	10.28851839	12.726449	0.414992169	4.48E-06	-0.350362402	0.028518903	no	no	no	no
Amer2	1.129178576	7.853166033	5.282967817	5.740354396	2.454201717	8.00E-60	-0.391822303	0.148900022	yes	no	no	no
Amfr	96.75911744	50.16905916	74.23514684	59.55877826	-1.12509385	2.28E-41	0.537516402	5.73E-07	no	no	yes	no
Amigo1	9.568980004	8.367749905	5.160156448	7.742415194	-0.531352569	8.63E-06	-0.554320911	0.000139383	no	no	no	no
Amigo2	8.537903722	0.633606023	0.921710676	0.522752479	-4.07360462	3.21E-97	0.655440315	0.035862229	no	no	yes	no
Amigo3	7.032426251	7.083180377	8.895518445	5.815137093	-0.320679344	0.015106496	0.456377913	0.004398782	no	no	no	no
Ammecr1	3.483774076	20.69095885	10.34936449	16.56806389	2.263552812	2.85E-99	-0.894233064	5.26E-16	yes	no	no	no
Ammecr1l	34.63533167	20.80508758	26.79798528	23.36009223	-1.04070406	2.85E-54	0.462968818	4.00E-09	no	no	yes	no
Amn	0.206424128	35.030835	18.53998056	37.73424533	7.092202331	1.66E-117	-0.880936259	0.000148972	yes	no	no	no
Amn1	12.29788702	6.474640542	10.14507162	6.850874319	-1.261717104	8.93E-09	0.771370584	4.89E-12	no	no	yes	no
Amot	9.113772181	26.3160285	47.61606667	30.85213981	1.224848209	7.87E-78	0.963297037	1.09E-29	yes	no	no	no
Amotl1	8.923818626	14.58306791	13.55310988	7.962608538	0.402125239	0.00054545	0.012762973	0.953604014	no	no	no	no
Amotl2	20.73285514	11.82011784	30.751774	12.95813172	-1.121478249	2.91E-57	1.486271231	4.97E-40	no	no	no	yes
Ampd2	26.84194887	34.31866245	23.36040804	33.49801178	0.04124778	0.728195609	-0.443250414	0.000591776	no	no	no	no
Ampd3	1.86009373	4.036626921	3.889941572	2.993237102	0.729498576	5.38E-06	0.136430416	0.518351155	no	no	no	no
Amt	76.11800751	48.61132127	61.39431751	55.43013613	-0.864412747	4.60E-23	0.34048804	0.008086659	no	no	no	no
Amy1	78.13929976	8.049608623	29.92658761	8.143735363	-3.551181877	2.11E-55	1.916020101	4.57E-12	no	no	no	yes
Amz1	0.500054956	3.474673697	2.454925798	2.354425642	2.391302292	2.39E-34	-0.303897396	0.066845999	yes	no	no	no
Amz2	8.314593801	12.24166309	10.57840649	11.23785222	0.261496006	0.001062032	-0.11100009	0.240891148	no	no	no	no
Anapc1	19.53255687	41.55031049	23.90098773	40.54156366	0.939560752	2.08E-25	-0.837005723	2.45E-14	no	no	no	no
Anapc10	4.169774567	6.009029146	5.929458102	5.547057917	0.178431227	0.166121264	0.135102833	0.301044003	no	no	no	no
Anapc11	5.279149306	8.209580992	5.172760297	8.295635034	0.321241721	0.000795858	-0.549718349	1.16E-08	no	no	no	no
Anapc13	51.58404104	55.28100974	53.12614454	53.78741799	-0.09912065	0.450456608	-0.067924125	0.728393456	no	no	no	no
Anapc15	10.9831011	18.9514013	8.961364569	17.409498	0.512154703	1.23E-09	-1.012275229	3.47E-19	no	yes	no	no
Anapc16	32.16759391	36.42740517	35.01942675	31.72137034	-0.102473944	0.182521762	0.018291326	0.869076253	no	no	no	no
Anapc2	24.14483125	24.20849972	23.37827158	23.31675065	-0.302214356	1.18E-05	0.036282069	0.64932538	no	no	no	no
Anapc4	17.55868264	37.90497044	35.02983675	33.70796837	0.910370303	1.11E-15	-0.094153241	0.579113661	no	no	no	no
Anapc5	26.98545291	45.44781764	39.50968726	43.92716495	0.676926615	5.09E-09	-0.331513095	0.024336718	no	no	no	no
Anapc7	9.103401574	17.3000789	9.286436181	15.04027369	0.683771255	4.42E-18	-0.86535312	9.45E-24	no	no	no	no
Ang	73.05944706	16.27865595	23.14369928	17.59984919	-2.436239198	7.07E-84	0.549860301	0.007615099	no	no	yes	no
Angel1	4.724855482	2.867220673	0.782198623	2.418778173	-1.05073509	2.90E-22	-1.675110952	3.46E-25	no	yes	yes	no
Angel2	15.24843078	20.40254896	15.74560697	17.52603299	0.133965912	0.057290832	-0.297454437	9.65E-06	no	no	no	no
Angpt2	3.589640247	19.31477702	11.43880493	18.50714692	2.088904248	7.38E-75	-0.6116092	0.000297806	yes	no	no	no
Angptl2	9.261585822	14.50806122	12.33620582	13.73343189	0.323092051	0.000156753	-0.106830031	0.574804547	no	no	no	no
Angptl3	67.76971997	29.72621099	64.38422068	38.86247768	-1.348053588	1.75E-50	1.053975643	1.26E-17	no	no	no	yes
Angptl4	64.53258256	39.94848901	21.93425668	41.6842821	-0.967900738	6.57E-10	-1.126463751	3.03E-10	no	yes	no	no
Angptl6	14.0226728	1.890619484	1.64681659	1.431345822	-3.145096685	9.73E-76	-0.063925612	0.81465242	no	no	yes	no
Ank	19.35637915	12.5099568	7.098344839	11.76273013	-0.959510339	3.72E-20	-0.676663291	9.54E-06	no	no	no	no
Ank1	0.050162127	6.558864168	4.706409201	3.638710227	6.452489772	3.43E-34	-0.286789786	0.652822751	yes	no	no	no
Ank2	1.863379524	25.87365198	26.96663584	17.21550217	3.558476858	2.47E-174	0.125370857	0.340246886	yes	no	no	no
Ank3	3.832882543	3.279264059	7.241843336	2.89046716	-0.54868477	0.002949982	1.247142053	2.43E-09	no	no	no	yes
Ankfy1	17.69420643	20.12087568	21.31151878	18.11301545	-0.084491695	0.112536264	0.153999804	0.016871358	no	no	no	no
Ankhd1	25.74854157	34.65360895	33.66429684	36.83444555	0.184175768	0.002433001	0.012535237	0.87585351	no	no	no	no
Ankib1	21.98437975	20.73523613	18.84612538	20.20621044	-0.364069223	9.05E-16	-0.048974019	0.369323611	no	no	no	no
Ankle1	0.601162151	22.84283068	3.632898303	17.52908048	4.937035678	3.65E-177	-2.498866402	3.80E-56	no	yes	no	no
Ankle2	30.12496989	30.18566456	25.76595154	31.10423651	-0.258120282	1.31E-10	-0.173318627	0.000191191	no	no	no	no
Ankmy2	5.504140651	5.748137916	6.019909233	5.105998444	-0.250143239	0.00581389	0.194707564	0.102278737	no	no	no	no
Ankra2	6.470922063	9.223847222	8.270689307	8.726175763	0.203708787	0.004111605	-0.03919317	0.697942563	no	no	no	no
Ankrd1	0.2601172	2.430677634	14.06368007	2.304160886	3.030224428	1.83E-20	2.294003317	5.97E-07	yes	no	no	yes
Ankrd10	10.37159766	38.7601088	26.57509462	34.18290589	1.636723769	1.86E-242	-0.476507641	1.95E-06	yes	no	no	no
Ankrd11	19.66028813	32.99287067	25.49142705	30.97962029	0.454565875	7.84E-08	-0.282234692	0.006385337	no	no	no	no
Ankrd12	6.250954864	7.644414583	11.5881446	7.112219797	-0.056776795	0.713417713	0.739571328	8.58E-10	no	no	no	no
Ankrd13a	17.56946524	24.54263777	24.73808861	29.3888342	0.200476936	0.028457106	0.097544653	0.196500885	no	no	no	no
Ankrd13b	1.799739523	14.23510678	2.570934708	10.72514482	2.613609685	6.34E-70	-2.253292123	1.55E-27	no	yes	no	no
Ankrd13c	18.32536719	20.29152951	16.76095567	21.7545867	-0.140449232	0.102181661	-0.16741114	0.092602061	no	no	no	no
Ankrd16	10.02334056	13.55350421	13.52985027	10.78434835	0.116695437	0.277293561	0.124826529	0.316109141	no	no	no	no
Ankrd17	30.40632433	51.47362043	42.04496699	49.74660749	0.58305203	9.66E-16	-0.30734967	0.000346887	no	no	no	no
Ankrd23	3.583357564	6.844409077	6.908174837	6.584005119	0.611667323	6.04E-06	0.138298065	0.425619171	no	no	no	no
Ankrd26	5.831835786	19.15311769	7.296006844	19.53436711	1.434936569	3.36E-68	-1.290756285	9.84E-41	no	yes	no	no
Ankrd27	14.83748323	34.20668677	24.39408913	35.2382993	0.974096805	3.62E-42	-0.431745548	4.66E-05	no	no	no	no
Ankrd28	27.83248504	38.29534922	21.91149563	36.04595158	0.235142857	0.0005895	-0.76711436	9.45E-37	no	no	no	no
Ankrd32	2.567534734	17.24202532	7.402459538	15.51755919	2.458301936	1.99E-92	-1.134112222	1.53E-25	no	yes	no	no
Ankrd33b	21.34783712	9.014151139	18.5883196	14.05843926	-1.59103098	2.15E-64	1.184835216	1.73E-26	no	no	no	yes
Ankrd37	2.93964175	7.250883884	6.832566987	10.61881551	0.997084669	1.30E-07	0.014168151	0.94536603	no	no	no	no
Ankrd39	4.676466474	7.533533149	6.494139679	6.776410294	0.435162067	6.85E-05	-0.102698631	0.529987407	no	no	no	no
Ankrd40	26.59847532	30.5464109	27.97735865	31.83230547	-0.090357881	0.140917709	-0.035334075	0.677255988	no	no	no	no
Ankrd44	3.682947849	2.097518433	2.987145828	2.225943371	-1.146945607	8.12E-23	0.646362082	0.000428876	no	no	yes	no
Ankrd46	38.42336909	24.96242082	28.69871468	27.03846568	-0.899876685	4.68E-64	0.274243255	7.58E-05	no	no	no	no
Ankrd49	11.04287159	30.5139617	15.77024548	29.0132575	1.201796831	1.18E-61	-0.882824124	1.70E-36	yes	no	no	no
Ankrd50	9.353141186	4.518045976	8.946492802	3.515279078	-1.389310178	8.69E-53	1.117797896	4.52E-17	no	no	no	yes
Ankrd52	15.40292224	26.53914615	15.59581441	24.73486578	0.491707335	7.56E-08	-0.661180747	7.24E-09	no	no	no	no
Ankrd54	6.916454799	13.38304687	12.38493461	12.98322899	0.622885319	8.72E-13	0.013287406	0.911984605	no	no	no	no
Ankrd55	15.06980565	0.975947243	1.819423464	1.013634279	-4.309146552	1.05E-63	1.038325704	0.000336408	no	no	no	yes
Ankrd61	2.523066091	4.082047103	3.366323204	3.171084047	0.279047677	0.191537033	-0.070589651	0.803184666	no	no	no	no
Anks1	13.92393902	11.74500031	8.626363158	11.76561834	-0.570205925	4.28E-11	-0.31143841	0.0003735	no	no	no	no
Anks3	15.5649423	33.14557932	30.52183786	27.83414858	0.788994978	1.22E-33	-0.010094478	0.925263561	no	no	no	no
Anks4b	102.2904417	63.36990967	88.34160206	72.39592609	-0.936412197	2.26E-62	0.515036028	2.79E-07	no	no	no	no
Ankzf1	19.76786537	15.9820665	19.28191203	14.56375478	-0.63309158	7.71E-19	0.392848256	5.31E-06	no	no	no	no
Anln	0.591449089	33.08357996	9.399822893	33.04125153	5.539359115	0	-1.741121186	7.18E-50	no	yes	no	no
Ano10	12.62502302	18.43948267	20.41684669	19.20588942	0.256803347	0.008038411	0.229209293	0.045858529	no	no	no	no
Ano6	5.757035716	10.4350567	11.53791893	9.096511913	0.543861791	5.49E-10	0.258404012	0.066602652	no	no	no	no
Ano8	3.660820977	4.648708511	5.308827706	4.386725011	0.01215202	0.937737546	0.32038953	0.014973943	no	no	no	no
Ano9	0.230936367	0.919076213	8.940264841	0.897873767	1.629977418	1.74E-07	1.381996137	5.59E-06	yes	no	no	yes
Anp32a	52.85980611	58.82926613	50.25797559	57.96507048	0.039230387	0.725902833	-0.312381013	0.032672379	no	no	no	no
Anp32b	22.99693066	76.72860994	28.72878994	71.23397355	1.75134596	8.78E-39	-1.575887528	1.40E-16	no	yes	no	no
Anp32e	19.66942884	55.95010009	22.73098911	46.88445923	1.345061162	1.71E-54	-1.317347682	2.76E-34	no	yes	no	no
Anpep	59.70843036	28.04495579	40.47443911	44.89448551	-1.378173002	4.32E-54	0.606018791	3.69E-07	no	no	yes	no
Antxr2	30.72851229	28.23536644	40.3936497	25.1710782	-0.410495933	1.62E-14	0.598774401	1.70E-18	no	no	no	no
Anxa1	2.319249522	9.311515702	11.37638408	9.135716972	1.87852751	4.96E-39	0.325737	0.056289013	yes	no	no	no
Anxa11	7.036252753	5.489620991	5.009153124	5.546973558	-0.624909758	3.30E-16	-0.06398079	0.711259176	no	no	no	no
Anxa13	0.834999015	35.31894157	21.95317463	16.29741651	5.191414436	3.33E-85	-0.616271321	0.117862036	yes	no	no	no
Anxa2	7.446758734	22.08076282	44.5838879	24.28737572	1.445497491	7.50E-23	0.997555545	2.65E-11	yes	no	no	no
Anxa3	2.476941543	5.602715031	11.23519184	5.412061954	0.83945868	6.23E-07	1.154218657	5.35E-06	no	no	no	yes
Anxa4	21.09926355	31.4317181	30.63884146	31.71160275	0.390882372	9.07E-06	-0.033481694	0.813839894	no	no	no	no
Anxa5	14.78159301	21.68907923	55.51813141	25.69520153	0.439032031	0.003292799	1.357725634	2.92E-14	no	no	no	yes
Anxa6	46.22102776	38.31415064	54.42346955	45.99063439	-0.435047523	0.000671205	0.486581181	0.00091547	no	no	no	no
Anxa7	24.28030894	17.48968647	28.74393481	21.31618226	-0.748514438	1.32E-30	0.791639052	4.28E-13	no	no	no	no
Anxa9	1.887978201	7.44078161	3.969413831	6.953052768	1.57103454	2.62E-21	-0.711737876	1.95E-05	yes	no	no	no
Aoc2	2.365078907	11.10066274	3.704682588	9.339160023	1.825529564	1.10E-28	-1.349169237	7.34E-14	no	yes	no	no
Aox1	39.10085927	0.846212605	4.710088723	2.124362271	-5.75773624	8.05E-52	2.234967244	3.18E-05	no	no	no	yes
Aox3	104.6281729	1.582905575	24.70730959	4.98997791	-6.086877161	3.82E-21	2.947426912	8.82E-06	no	no	no	yes
Ap1ar	24.44422166	35.25940611	17.82623602	30.97590756	0.264481494	4.14E-08	-0.917963635	3.23E-46	no	no	no	no
Ap1b1	38.40328485	41.29771293	38.61967887	43.45938252	-0.096547745	0.3150647	-0.088619047	0.440665909	no	no	no	no
Ap1g1	42.71085832	42.58438686	51.43974431	43.18854826	-0.236815683	8.62E-05	0.298117681	0.000931847	no	no	no	no
Ap1g2	6.728809897	17.51450328	10.88539198	12.83790741	1.056496153	2.56E-31	-0.544494559	0.000538657	yes	no	no	no
Ap1m1	26.0508569	40.04672215	26.69693509	34.5038326	0.413202818	2.41E-07	-0.558160034	2.22E-07	no	no	no	no
Ap1s1	30.09705686	52.28308994	38.2905239	48.40490804	0.628243974	4.53E-10	-0.469364149	2.85E-05	no	no	no	no
Ap1s2	2.04505708	5.663514408	16.55788073	5.948853186	1.08923377	7.38E-10	1.670453395	4.55E-10	yes	no	no	yes
Ap1s3	7.4450703	10.78409674	8.335990713	9.806624366	0.315195874	0.003399212	-0.350185649	0.002401069	no	no	no	no
Ap2a1	24.69211269	27.92614296	23.58774656	27.54343884	-0.103814003	0.073908547	-0.163632971	0.038356183	no	no	no	no
Ap2a2	49.35533183	55.33693157	67.58160258	60.51329624	0.015572905	0.87891671	0.227715136	0.059488226	no	no	no	no
Ap2b1	26.78518752	28.39692165	32.5719377	28.49634274	-0.136874077	0.015869106	0.210272929	0.001995233	no	no	no	no
Ap2m1	95.9353265	75.42308069	108.0192826	82.65728055	-0.467235755	1.20E-05	0.422009341	0.004351449	no	no	no	no
Ap2s1	58.92789138	52.31375183	52.9834251	54.47338986	-0.432612623	1.86E-05	0.076995569	0.554269891	no	no	no	no
Ap3b1	23.49911883	26.99145644	32.86601104	27.03187614	-0.040530626	0.6783324	0.336728412	0.003141347	no	no	no	no
Ap3d1	39.56431958	33.50754326	42.93651964	35.96882658	-0.508978836	1.13E-15	0.425099377	2.07E-09	no	no	no	no
Ap3m1	54.87646747	33.70845057	45.42334999	36.73847325	-0.926592587	8.96E-24	0.456655471	1.69E-08	no	no	no	no
Ap3s1	26.1253205	19.38821338	29.10881781	25.04450845	-0.693171484	3.07E-07	0.652909941	2.29E-17	no	no	no	no
Ap3s2	13.02477196	13.23898636	12.30326652	12.79807562	-0.283253644	8.18E-06	-0.003971752	0.965904593	no	no	no	no
Ap4b1	18.49132688	15.13251985	21.05649394	16.26412868	-0.611917049	2.88E-15	0.591865899	1.14E-14	no	no	no	no
Ap4e1	4.423594866	8.55945695	6.452793033	8.100456726	0.648192853	9.03E-29	-0.303343061	6.19E-07	no	no	no	no
Ap4m1	11.79992324	16.1665788	15.45692902	13.43305063	0.176069466	0.045330668	0.042826699	0.682666862	no	no	no	no
Ap4s1	17.34485837	23.01249296	15.25195407	21.5634554	0.113400732	0.221441598	-0.464091183	4.17E-05	no	no	no	no
Ap5b1	4.697717306	3.333390242	3.895100421	4.124140308	-0.860044649	4.10E-08	0.376458608	0.043709012	no	no	no	no
Ap5m1	9.052545248	10.80804976	11.58099515	11.0644738	-0.074796771	0.432997252	0.213553784	0.000771331	no	no	no	no
Ap5s1	23.64198269	5.059755198	12.80455708	6.375465799	-2.621897916	6.85E-82	1.54133147	2.85E-16	no	no	no	yes
Ap5z1	6.921821955	7.904525337	7.842502016	6.313642984	-0.159269645	0.214369288	0.120330924	0.38467434	no	no	no	no
Apaf1	3.50434055	9.325764132	15.28364924	10.29384101	1.091745128	1.88E-70	0.839363211	5.38E-29	yes	no	no	no
Apba3	44.48314264	28.02255741	41.57212728	31.92218575	-0.983785193	3.24E-36	0.686090585	7.54E-11	no	no	no	no
Apbb1	1.478490684	11.61623392	17.14471654	15.78874394	2.638310183	2.13E-62	0.647114002	0.000487363	yes	no	no	no
Apbb1ip	0.738590974	3.189142737	2.399279963	2.235932356	1.768211973	2.13E-23	-0.270734781	0.208144626	yes	no	no	no
Apbb2	10.91517283	15.03452511	16.11916875	16.54453383	0.154714429	0.060747658	0.213466636	0.002533262	no	no	no	no
Apbb3	24.37767582	13.57517717	22.03352889	13.94372736	-1.152269777	2.24E-23	0.795581281	1.90E-06	no	no	yes	no
Apc	23.41289524	24.08411012	24.24857622	26.95370145	-0.260284801	0.00039175	0.106635391	0.123867273	no	no	no	no
Apcs	142.3349804	33.8212448	133.875811	43.17070161	-2.377025003	1.69E-101	2.056757697	4.37E-53	no	no	no	yes
Apeh	60.99242555	69.54647131	64.45033029	63.49622882	0.010474635	0.911056935	-0.131854385	0.236260839	no	no	no	no
Apex1	15.75980264	30.09860245	15.83613001	33.16284234	0.917555029	1.51E-09	-1.127983368	2.46E-09	no	yes	no	no
Apex2	5.129859151	11.07582589	9.028694403	10.2205794	0.773277157	3.44E-11	-0.138949819	0.366152486	no	no	no	no
Aph1a	37.90948031	29.93080091	30.64963764	29.80362468	-0.599521787	6.26E-34	0.087085825	0.300034366	no	no	no	no
Aph1b	10.46531128	2.412375926	3.47441333	1.308029298	-2.470282402	9.98E-53	0.689552708	0.000871271	no	no	yes	no
Aph1c	10.58400093	2.184623188	3.497870517	1.496371522	-2.676771576	1.96E-78	0.87165358	6.84E-06	no	no	yes	no
Api5	33.44438334	38.67686704	28.05594481	38.46949657	0.008022776	0.914790971	-0.453543795	1.93E-13	no	no	no	no
Apip	17.99185455	15.0042603	13.23212517	12.0879824	-0.4688717	0.004007078	-0.177876717	0.412801327	no	no	no	no
Apitd1	0.305436249	9.658854689	2.663075196	9.461768196	4.482051314	4.35E-41	-1.692845282	4.54E-17	no	yes	no	no
Aplf	4.468802071	9.748572861	6.219694714	8.689880217	0.869465055	2.78E-22	-0.57926597	4.02E-07	no	no	no	no
Apln	0.052136903	2.900914494	4.167652375	9.000301655	5.329208066	2.33E-32	0.643027511	0.089352307	yes	no	no	no
Aplnr	0.140795048	6.489837652	5.753698628	4.508912352	5.093330224	1.04E-52	0.027326017	0.942532878	yes	no	no	no
Aplp1	0.422145994	1.295729309	6.542645504	2.283460564	1.353128332	1.41E-07	2.422652377	4.04E-27	yes	no	no	yes
Aplp2	87.92119508	64.11303811	87.51989686	67.78772586	-0.568907239	2.65E-08	0.353470007	0.013746289	no	no	no	no
Apmap	42.66176822	30.27535383	37.13916089	33.30553086	-0.728997082	1.13E-26	0.330954352	0.003711275	no	no	no	no
Apoa1	230.0962038	136.6913823	215.6227899	150.6307799	-0.420893254	0.10623872	0.104400773	0.782152953	no	no	no	no
Apoa1bp	65.93765151	43.40875984	56.7010872	43.61432862	-0.854910824	7.87E-25	0.419560159	0.000118422	no	no	no	no
Apoa2	218.4741378	124.1109579	196.2771339	138.1592605	-0.408601859	0.149170579	0.030117956	0.944771887	no	no	no	no
Apoa4	169.520744	85.53883283	129.2843269	60.18121444	-1.080138751	1.79E-10	0.468317827	0.049429675	no	no	yes	no
Apoa5	202.1016848	14.50218944	40.17712714	18.73506364	-4.08399769	2.55E-27	1.432281473	0.001571729	no	no	no	yes
Apob	225.5680253	134.4087276	220.6303996	162.129652	-0.606986286	0.001872525	0.353417334	0.171312012	no	no	no	no
Apobec1	20.59343882	16.10551891	25.39824365	18.06119587	-0.646142983	1.07E-10	0.748112212	8.60E-15	no	no	no	no
Apobec3	2.141201027	2.69598309	5.028272397	3.364008986	-0.00315523	0.984302235	1.015351303	6.12E-10	no	no	no	yes
Apobr	0.801227185	2.511562751	3.4551397	1.758294813	1.238847398	7.57E-10	0.608560618	0.011741969	yes	no	no	no
Apoc1	139.6467337	67.19044345	113.1114664	83.2792891	-1.036192952	1.14E-08	0.500593801	0.040982148	no	no	yes	no
Apoc2	77.15743455	78.22726972	106.6853205	91.09216802	0.33948824	0.208305637	-0.089990815	0.820105533	no	no	no	no
Apoc3	186.1864959	33.61877601	53.6013716	39.02049756	-2.747259033	2.43E-52	0.712320525	0.002848387	no	no	yes	no
Apoc4	141.6013241	50.89879114	81.8126772	56.67916273	-1.653156956	8.99E-33	0.628093912	0.00031228	no	no	yes	no
Apoe	229.5535805	152.131974	219.3291305	177.1294544	-0.119400874	0.727761607	-0.152422357	0.714338939	no	no	no	no
Apof	135.7367779	42.66658802	118.5504527	53.67581847	-1.858924005	7.07E-55	1.436215668	7.40E-24	no	no	no	yes
Apoh	148.1073897	78.89565243	123.9241528	89.75617247	-0.804965452	0.000240055	0.334334231	0.229929555	no	no	no	no
Apol10a	8.35439706	0.400812664	0.733596153	0.479484381	-4.69409456	2.51E-22	0.887429613	0.145580975	no	no	yes	no
Apol11b	0.254397121	6.024581144	4.432179887	3.675980455	3.968889276	3.47E-12	-0.122602569	0.867057063	yes	no	no	no
Apol7a	96.20908223	14.47361673	75.49470083	14.72939796	-3.06284042	9.08E-65	2.456448476	4.17E-27	no	no	no	yes
Apol8	0.067041448	3.268769925	2.605972242	1.223573745	4.95447573	5.33E-13	-0.077837767	0.907538828	yes	no	no	no
Apol9a	26.84644895	2.548670992	5.977749013	3.839438745	-3.717254684	1.42E-68	1.304329667	0.000262112	no	no	no	yes
Apol9b	69.1473996	1.624094462	5.413206654	4.081163931	-5.681351298	4.09E-59	1.660244714	0.000138288	no	no	no	yes
Apold1	2.899430562	2.626187735	2.794026126	4.726267592	-0.479821865	0.002436504	0.212495124	0.41548344	no	no	no	no
Apom	134.4430989	94.60898365	134.1866029	111.3593127	-0.447264206	0.015199827	0.226635627	0.358456588	no	no	no	no
Apon	157.859752	4.455928346	34.69117592	10.45413965	-5.256123999	2.58E-35	2.578475004	1.11E-07	no	no	no	yes
Apoo	19.70239969	22.90915126	16.44409763	24.38911322	0.027450538	0.853611982	-0.498787476	0.000782124	no	no	no	no
Apool	8.087858126	8.713296506	10.39919618	9.076367728	-0.130595818	0.233235796	0.307382629	0.007761285	no	no	no	no
Apopt1	7.602976321	13.5992643	8.312791489	12.35436049	0.624324297	3.02E-25	-0.685910808	3.57E-23	no	no	no	no
App	44.85761164	24.6413121	29.9843684	21.24595497	-1.142801069	9.19E-58	0.370038358	0.003460828	no	no	yes	no
Appbp2	19.00463518	36.34399551	32.32008469	38.05805179	0.711194065	2.73E-19	-0.14550606	0.188907751	no	no	no	no
Appl1	13.77514378	23.5628549	22.54409939	21.27792131	0.518102683	8.88E-10	-0.00194323	0.986394555	no	no	no	no
Appl2	18.77424267	16.17338675	17.48130615	15.92518118	-0.501972192	2.04E-11	0.213562168	0.013164229	no	no	no	no
Aprt	38.71168085	78.44789335	85.51661391	82.09534653	1.00901623	5.27E-11	-0.078929639	0.723169409	yes	no	no	no
Aptx	5.88609528	5.054246617	6.732008482	4.509168064	-0.509770611	1.40E-10	0.515390719	2.11E-06	no	no	no	no
Aqp1	72.41343688	32.88553663	41.69482623	24.92359168	-1.302282417	0.00012195	0.294757128	0.483528375	no	no	yes	no
Aqp11	45.65352807	47.40097916	35.9127414	43.76291693	-0.189641958	0.038339349	-0.370739525	0.005927389	no	no	no	no
Aqp3	0.11297565	2.299333898	3.642282809	15.61054049	3.827871502	4.91E-19	0.731665826	0.029054935	yes	no	no	no
Aqp4	5.056692439	3.711398349	4.658830368	7.760456835	-0.778831342	0.064476312	0.404776763	0.47244749	no	no	no	no
Aqp7	0.787738191	7.299953964	5.958136879	6.013430636	2.880472852	5.03E-93	-0.191054318	0.279382536	yes	no	no	no
Aqp8	70.37505304	40.88708142	92.77531457	38.43494101	-1.046663166	7.16E-14	1.243158676	1.34E-13	no	no	no	yes
Aqp9	112.7290839	4.380205609	12.12467806	8.600859413	-5.02311407	9.15E-35	1.456915019	0.003963404	no	no	no	yes
Aqr	6.128526844	14.86243559	7.224638488	13.71710769	1.036780325	2.10E-55	-1.002004164	5.70E-38	no	yes	no	no
Araf	26.98075321	26.63111	30.85214588	27.01369027	-0.279572646	1.43E-07	0.268123451	0.000201105	no	no	no	no
Arap1	31.83164152	9.783491514	17.3816345	11.06283697	-2.037209871	9.34E-134	0.970184109	8.28E-12	no	no	yes	no
Arap2	16.21210914	4.747527796	7.017638379	4.061710873	-2.157451338	8.24E-100	0.76580981	0.001518832	no	no	yes	no
Arap3	6.168332344	3.511370593	3.984303058	3.289520724	-1.169256767	3.07E-16	0.373194282	0.094274749	no	no	yes	no
Arcn1	60.38698669	55.52264202	74.95911518	59.16074161	-0.237601362	0.006910701	0.343830501	0.004708031	no	no	no	no
Arel1	30.27501721	14.97848521	21.04825773	15.19029372	-1.33701038	4.70E-87	0.608277483	3.74E-11	no	no	yes	no
Arf1	98.96485932	85.23609055	103.7988421	92.97831416	-0.222951461	0.127323807	0.075853916	0.724808309	no	no	no	no
Arf2	16.65446259	16.3279692	16.81217701	11.84773812	-0.325611589	0.001825985	0.140399145	0.299733768	no	no	no	no
Arf3	26.20256248	25.94310821	28.16765833	24.79223171	-0.311578686	1.53E-05	0.205435678	0.011445567	no	no	no	no
Arf4	63.98646716	61.03901225	80.83183891	67.70293022	-0.107250801	0.449081636	0.241959021	0.139412871	no	no	no	no
Arf5	81.4422242	47.27729101	72.82895701	49.78442285	-1.020898065	2.33E-27	0.657112713	2.16E-10	no	no	yes	no
Arf6	48.11159271	55.22699143	61.83878773	61.23593385	-0.001798551	0.984808285	0.161612086	0.10016706	no	no	no	no
Arfgap1	27.42376083	26.08993828	41.54322293	25.92820937	-0.356592251	2.52E-06	0.768236024	2.37E-16	no	no	no	no
Arfgap2	22.01331137	15.67483337	19.57391335	15.99146829	-0.714438137	1.23E-20	0.350861717	4.82E-06	no	no	no	no
Arfgap3	13.82231197	11.15535971	33.02726063	9.953118334	-0.589672324	0.001750623	1.699132424	2.04E-44	no	no	no	yes
Arfgef1	28.63891419	28.6304407	25.53953474	29.90011618	-0.214835211	0.012805751	-0.151360412	0.068238653	no	no	no	no
Arfgef2	33.920342	25.91684538	39.237529	25.47665737	-0.649247995	2.13E-17	0.331052713	9.93E-05	no	no	no	no
Arfip1	18.50916251	16.80678087	24.44544535	18.26329061	-0.417703205	1.98E-07	0.622289037	9.28E-15	no	no	no	no
Arfip2	13.06879109	22.59119344	15.45299797	21.11304506	0.500846621	1.90E-07	-0.444408195	5.34E-06	no	no	no	no
Arfrp1	10.69068557	18.36992237	10.17640867	17.20520485	0.49342608	1.10E-13	-0.728076434	1.26E-13	no	no	no	no
Arg1	169.0809691	85.01298581	118.776439	80.71377149	-1.011485135	3.42E-11	0.281980405	0.149583979	no	no	yes	no
Arglu1	32.88921973	45.07092337	35.49310933	49.36821578	0.245199197	1.85E-06	-0.342290364	1.18E-05	no	no	no	no
Arhgap1	14.06432963	34.06007024	33.91896753	38.8792107	0.983792898	2.18E-51	0.080195097	0.415331704	no	no	no	no
Arhgap10	1.328528599	25.03165939	14.34981637	20.2501057	4.115918732	8.26E-188	-0.790713861	5.81E-09	yes	no	no	no
Arhgap11a	1.796685181	40.31633803	18.25858876	37.72940393	4.23219613	0	-1.113017258	2.36E-78	no	yes	no	no
Arhgap12	26.6574121	21.46995606	26.5992064	21.63511328	-0.595253139	1.94E-16	0.388288299	2.82E-13	no	no	no	no
Arhgap17	5.563684348	10.84953547	10.23606966	9.205464993	0.632515034	3.82E-14	0.051483191	0.659334352	no	no	no	no
Arhgap18	9.314612714	19.69702341	30.46496707	23.22027589	0.817999539	3.24E-15	0.71308744	8.99E-10	no	no	no	no
Arhgap19	2.804283551	32.70077554	15.29459823	26.51045107	3.262873726	0	-1.015700108	1.46E-28	no	yes	no	no
Arhgap21	25.98785586	26.29303739	28.76970009	23.28756463	-0.28425373	0.00139119	0.224345386	0.00174254	no	no	no	no
Arhgap22	0.310997659	6.469352053	14.75718708	7.499230831	4.0687981	3.15E-80	1.290800052	9.69E-16	yes	no	no	yes
Arhgap23	8.324144102	3.9096321	4.30241307	3.686079344	-1.470113417	4.38E-16	0.319024643	0.187307174	no	no	yes	no
Arhgap24	5.972359911	2.630759766	5.612501013	2.272848459	-1.520741769	8.46E-51	1.224404618	1.84E-10	no	no	no	yes
Arhgap25	2.173671389	10.65457448	9.946195192	9.240697022	1.987637762	9.82E-39	0.006531622	0.977221384	yes	no	no	no
Arhgap26	13.86283576	1.711135279	5.125156292	2.578617022	-3.390318354	1.45E-206	1.743388417	1.25E-46	no	no	no	yes
Arhgap27	1.096213554	6.427975262	5.927721021	8.99617159	2.151673569	6.05E-22	0.074825998	0.847108409	yes	no	no	no
Arhgap29	50.4896657	33.99790884	48.41518702	33.15321986	-0.813510863	8.51E-25	0.547929585	2.50E-09	no	no	no	no
Arhgap30	3.486749568	8.048050942	10.11701779	7.068979735	0.847679484	8.37E-10	0.499323186	0.001148895	no	no	no	no
Arhgap31	8.380490199	5.268484792	5.219159946	4.682139078	-1.012549198	5.23E-14	0.145938726	0.398456049	no	no	yes	no
Arhgap32	8.30734079	10.3248273	7.69971849	8.538759898	-0.026596593	0.853288924	-0.279310794	0.033185557	no	no	no	no
Arhgap39	2.699931405	14.42239096	5.36795691	12.36897836	2.097598922	1.94E-89	-1.276642747	8.91E-30	no	yes	no	no
Arhgap4	4.342252086	4.777142922	5.959252846	4.055685186	-0.245624126	0.134238711	0.485979848	0.014155337	no	no	no	no
Arhgap42	41.18291423	25.65790077	26.09258125	23.28990468	-0.952881306	9.26E-22	0.098517392	0.512373295	no	no	no	no
Arhgap5	75.4733632	54.64918773	74.98199265	58.04568003	-0.66255293	7.17E-09	0.452599175	1.07E-08	no	no	no	no
Arhgap6	3.694195402	0.584551739	1.074149108	0.704876106	-3.000763461	1.53E-97	1.010518267	1.64E-07	no	no	no	yes
Arhgap9	1.768350828	5.315420893	5.231195411	5.54913827	1.262052464	1.17E-15	0.102657885	0.587731188	yes	no	no	no
Arhgdia	50.21307503	69.42724069	69.43194362	70.96999956	0.438106571	0.001540439	-0.188608835	0.304136488	no	no	no	no
Arhgdib	6.554392761	16.07235876	22.52061879	15.65413684	0.997650268	1.22E-17	0.574451764	3.61E-05	no	no	no	no
Arhgdig	0.037295179	17.82028114	0.774221918	14.92431755	8.087780809	3.52E-33	-4.3240939	1.14E-67	no	yes	no	no
Arhgef1	15.85715741	21.89890874	14.61251038	19.75125641	0.17448248	0.016518123	-0.479760473	5.39E-09	no	no	no	no
Arhgef10	9.204773764	4.571736229	11.58274613	4.965214854	-1.359966864	2.42E-28	1.481795682	5.27E-26	no	no	no	yes
Arhgef10l	15.96760501	13.47732949	11.02253651	13.83540704	-0.549369626	6.96E-07	-0.166530397	0.369799815	no	no	no	no
Arhgef11	17.219365	12.102687	14.41435042	12.42648213	-0.840258818	1.30E-30	0.379175177	1.38E-06	no	no	no	no
Arhgef12	52.41702757	32.12633507	37.72445227	32.03342344	-0.970861988	3.39E-65	0.290589964	3.78E-05	no	no	no	no
Arhgef15	6.497412131	2.900876622	2.776348061	2.456692483	-1.437870677	1.22E-36	0.026463194	0.888794033	no	no	yes	no
Arhgef16	1.543922816	7.61972946	14.50376975	11.89032344	1.942567047	1.07E-27	1.081816172	2.57E-09	yes	no	no	yes
Arhgef17	2.596501556	5.529517816	14.07791237	7.083087218	0.723400441	0.000112843	1.477940065	3.72E-12	no	no	no	yes
Arhgef18	12.81795848	10.93395972	15.36230078	13.64230626	-0.559640809	6.80E-12	0.630913628	8.11E-07	no	no	no	no
Arhgef19	16.14885569	1.464424524	3.044466818	2.04938756	-3.768825108	9.44E-29	1.123071146	0.007109162	no	no	no	yes
Arhgef2	2.661654741	6.679213141	7.159438054	5.287679546	0.968354364	9.43E-13	0.259858576	0.18889267	no	no	no	no
Arhgef25	2.845089885	4.677239266	5.84205807	7.411317012	0.394737357	0.004031413	0.452892326	0.041597413	no	no	no	no
Arhgef26	26.04380845	13.29462157	11.51075418	5.736191671	-1.300086503	4.54E-17	-0.079769298	0.793703232	no	no	yes	no
Arhgef28	0.04169501	1.261578599	4.755349065	3.060278862	4.383936744	8.42E-29	2.12729671	6.29E-13	yes	no	no	yes
Arhgef3	15.03819655	11.31748877	16.99466291	8.580569561	-0.747160369	3.43E-16	0.714108614	1.30E-17	no	no	no	no
Arhgef37	8.492858045	0.114080402	0.239896644	0.165225482	-6.122673916	7.42E-40	0.795067605	0.191595586	no	no	yes	no
Arhgef39	1.207716319	24.60342255	8.018943313	26.77571619	3.955781118	1.83E-201	-1.499121708	1.82E-42	no	yes	no	no
Arhgef40	7.479423346	6.062553739	14.1801943	7.994318366	-0.630381326	8.34E-09	1.35333317	9.26E-28	no	no	no	yes
Arhgef5	13.58521816	3.852680774	15.45509342	8.695017674	-2.154796861	5.25E-36	2.072362347	2.21E-13	no	no	no	yes
Arhgef6	2.023106775	3.493304942	6.132036673	3.525631702	0.479675575	1.02E-07	0.931871055	2.46E-11	no	no	no	no
Arhgef7	12.37995117	25.93288915	23.27531511	26.89047738	0.798420918	1.52E-50	-0.087283635	0.391033535	no	no	no	no
Arid1a	20.12500296	32.40343127	29.26363872	30.98591537	0.405099021	1.68E-07	-0.066847297	0.597455919	no	no	no	no
Arid1b	9.926250498	10.25891118	10.85983359	10.51722876	-0.288194691	0.000310065	0.219851607	0.042274213	no	no	no	no
Arid2	19.80958149	29.08236806	22.59594138	27.62108728	0.260928163	7.52E-06	-0.274606509	6.56E-08	no	no	no	no
Arid3a	1.196529045	27.16804727	39.31490286	34.43292411	4.191053257	6.38E-221	0.627633004	5.37E-09	yes	no	no	no
Arid3b	2.039008488	0.998376131	3.020294114	1.648075449	-1.326223086	1.72E-23	1.686337791	5.86E-25	no	no	no	yes
Arid4a	12.73653117	12.05041758	12.37571759	9.907438286	-0.359660041	5.25E-11	0.131074463	0.249620228	no	no	no	no
Arid4b	11.2999293	12.28685751	15.50635953	10.60506237	-0.17958713	0.009098876	0.429092456	6.63E-14	no	no	no	no
Arid5b	23.69573567	12.79231004	22.28128079	15.68201258	-1.219292467	1.85E-19	0.920102144	5.30E-19	no	no	yes	no
Arih1	17.36752683	23.53056916	18.12783419	22.97654904	0.198543298	0.017258226	-0.327336347	3.82E-13	no	no	no	no
Arih2	27.70722381	19.52446404	21.38881056	20.2294968	-0.79120444	4.31E-77	0.221629814	0.007224877	no	no	no	no
Arl1	60.09553564	51.2371041	57.07689968	51.00143944	-0.323374087	0.015105639	0.030316265	0.885670258	no	no	no	no
Arl10	7.584191966	24.18978827	14.5986715	19.66661399	1.386226181	1.17E-46	-0.593731829	1.03E-09	yes	no	no	no
Arl11	0.409560018	3.241017213	3.454155286	3.263621978	2.535781605	4.65E-20	0.279502714	0.202257339	yes	no	no	no
Arl13b	6.415390937	4.573390463	5.242568713	4.01646417	-0.797906703	3.19E-15	0.314952662	0.012167059	no	no	no	no
Arl14ep	12.85547146	17.43247648	15.92451062	16.11966477	0.125437435	0.135489472	-0.009820821	0.937744023	no	no	no	no
Arl15	9.528425816	11.06825322	7.876489752	9.935423265	-0.095620377	0.301308046	-0.377992386	0.000129536	no	no	no	no
Arl16	8.77140741	11.07096843	10.12662246	8.910956363	0.041677002	0.704263896	-0.036316701	0.820357976	no	no	no	no
Arl2	6.289946089	22.57701386	8.632186458	20.83503529	1.507154746	3.10E-27	-1.186576644	1.63E-14	no	yes	no	no
Arl2bp	5.076881968	27.68575507	13.99891948	24.73430195	2.147119943	1.85E-99	-0.914410829	1.46E-15	yes	no	no	no
Arl3	13.58268069	36.96993194	27.58151061	31.35234985	1.239360022	8.14E-16	-0.398798101	0.074160583	yes	no	no	no
Arl4a	14.61263765	12.66284262	10.25715281	8.619535456	-0.518044663	2.94E-05	-0.179432648	0.270867526	no	no	no	no
Arl4c	1.722854137	3.486036838	6.010980297	5.315924474	0.673260073	9.33E-07	0.888756995	3.68E-05	no	no	no	no
Arl4d	34.66577733	14.73771697	23.40930313	18.09070315	-1.586763639	5.95E-15	0.783319698	0.000488283	no	no	yes	no
Arl5a	83.87207525	55.5396209	76.39091916	60.99847642	-0.782646559	1.29E-17	0.441672368	8.09E-06	no	no	no	no
Arl5b	26.51892428	19.41140239	24.31165383	17.7072261	-0.749803585	6.70E-17	0.415387219	2.61E-09	no	no	no	no
Arl5c	2.284714317	2.389337679	6.28033168	3.269906115	-0.240790459	0.06371109	1.499102489	4.07E-17	no	no	no	yes
Arl6ip1	87.85095268	82.47352818	95.08533	91.29645937	-0.177314808	0.148735508	0.085634476	0.601539903	no	no	no	no
Arl6ip4	41.54168219	51.68311624	31.75705923	43.01884269	0.041932575	0.676035482	-0.641169666	5.26E-16	no	no	no	no
Arl6ip5	41.89080136	45.6136622	52.38951075	44.07670635	-0.117647574	0.056921713	0.218627001	0.021119605	no	no	no	no
Arl6ip6	7.969634558	13.78122887	10.82730042	12.91932621	0.476730349	2.07E-11	-0.237408541	0.001098136	no	no	no	no
Arl8a	10.67378251	9.095727054	15.58612517	9.93292526	-0.576686024	2.83E-07	0.940700336	6.04E-10	no	no	no	no
Arl8b	49.7331054	59.87015773	70.0578956	70.25758624	0.07398009	0.328534496	0.221263032	0.015233794	no	no	no	no
Armc1	42.49378828	48.27673029	36.24446436	49.24093361	-0.028035638	0.737536521	-0.395984572	9.55E-09	no	no	no	no
Armc10	10.13230953	23.44450293	20.86468699	21.15132	0.938956548	2.24E-60	-0.088543516	0.387955621	no	no	no	no
Armc5	5.63518239	4.889239507	6.102710805	4.827238822	-0.546540575	5.84E-06	0.476789872	9.96E-05	no	no	no	no
Armc6	8.966331024	23.80437385	10.81711822	27.49922633	1.112993256	1.03E-27	-1.006299649	2.48E-13	no	yes	no	no
Armc7	2.807663442	3.65237961	4.158533276	3.411665446	-0.014628562	0.936381787	0.390592664	0.045252612	no	no	no	no
Armc8	9.932852781	13.21879769	10.91463884	12.79531982	0.110010689	0.108299917	-0.163808019	0.049058195	no	no	no	no
Armc9	1.800786167	4.471271489	2.92963474	3.628975796	1.018091095	2.39E-35	-0.487918862	1.64E-05	yes	no	no	no
Armcx1	3.221349374	2.2722673	3.735793008	1.645215747	-0.817986716	1.58E-07	0.813591269	0.000811664	no	no	no	no
Armcx3	19.92861661	6.123169383	8.606934863	5.450240234	-2.023082889	5.52E-96	0.617709886	0.000630706	no	no	yes	no
Armcx5	4.120175017	5.933661909	5.473126632	5.186065199	0.222041174	0.052846076	-0.010605803	0.951942372	no	no	no	no
Arnt	16.46799998	12.93639376	15.40432461	12.50624991	-0.660319074	2.77E-18	0.365360958	3.91E-07	no	no	no	no
Arntl	3.250742016	1.693809609	7.579026106	2.24437679	-1.162095434	3.46E-05	2.226200596	5.33E-55	no	no	no	yes
Arpc1a	36.91414497	38.08517755	40.3825615	38.47700617	-0.126881816	0.161052327	0.043006018	0.749955793	no	no	no	no
Arpc1b	34.50820606	34.53496056	46.49512883	37.06855415	-0.224300599	0.020383595	0.450976206	0.001484945	no	no	no	no
Arpc2	45.44503841	50.64312682	52.55937751	52.32393005	0.084223665	0.551230219	-0.074254074	0.711584645	no	no	no	no
Arpc3	44.92589141	48.36143113	49.79054814	47.9559492	0.074833629	0.697865799	-0.101474949	0.699146694	no	no	no	no
Arpc4	20.14912995	25.27484892	22.72388569	26.05118351	0.132525247	0.085401112	-0.147014133	0.118534404	no	no	no	no
Arpc5	59.53457038	52.62839973	73.36909358	55.82811174	-0.382638791	4.51E-10	0.472684221	3.22E-10	no	no	no	no
Arpc5l	40.98527454	33.04425068	34.06320919	37.92268089	-0.561513494	8.48E-19	0.096450679	0.266693901	no	no	no	no
Arpp19	20.93344337	32.50896422	38.05703913	36.67624209	0.398707741	8.00E-07	0.272274674	0.000513475	no	no	no	no
Arrb1	10.66467819	26.54057485	31.35657996	29.69908441	1.032336556	1.12E-13	0.324026754	0.05138924	yes	no	no	no
Arrb2	18.16988604	26.53833332	21.58301612	21.39979818	0.24419092	0.001202228	-0.201515732	0.019537658	no	no	no	no
Arrdc1	3.632690458	10.55241494	12.51965057	8.850270247	1.201839145	1.01E-18	0.381819131	0.005778826	yes	no	no	no
Arrdc2	15.47278642	14.18876775	9.606532639	8.659406389	-0.469773222	0.002699533	-0.428116174	0.003411821	no	no	no	no
Arrdc3	69.09794509	29.0838061	32.55966445	24.54075361	-1.526121242	5.10E-44	0.230593434	0.030572829	no	no	yes	no
Arrdc4	14.92991171	26.6126496	21.09524772	31.67854201	0.521743955	0.000310891	-0.228304517	0.175812284	no	no	no	no
Arsa	22.2476071	9.488839875	11.91887362	11.5299357	-1.58636175	1.26E-12	0.477654777	0.015378827	no	no	yes	no
Arsb	7.964438399	6.507992395	4.819738574	7.427775631	-0.615910835	5.53E-09	-0.289433765	0.068809656	no	no	no	no
Arsg	23.21503423	11.63141351	36.00384587	14.85358284	-1.334179804	1.72E-27	1.752699429	1.38E-53	no	no	no	yes
Arsk	5.486395767	6.675384092	5.644838438	6.025766428	0.018640209	0.854951828	-0.195586519	0.006826189	no	no	no	no
Art2a-ps	7.220016433	2.619279353	3.04010323	1.462208976	-1.786303838	2.50E-14	0.357533877	0.345450889	no	no	yes	no
Art4	2.796444313	4.31555968	5.302435486	2.12797753	0.253343237	0.22237528	0.436530045	0.168484196	no	no	no	no
Arv1	3.697476878	13.41665495	4.221564738	11.6309957	1.502687288	5.33E-25	-1.481168487	5.07E-23	no	yes	no	no
Arvcf	11.90054484	10.74284865	11.04010436	11.87148592	-0.499860502	8.86E-07	0.187885625	0.247035424	no	no	no	no
Arxes1	0.020194222	21.19641936	3.783373975	8.021336555	9.004840452	1.99E-42	-2.390408384	7.18E-26	no	yes	no	no
Arxes2	0.224529241	29.00869819	13.52036598	15.27390657	6.70868904	2.44E-126	-1.018660557	3.75E-12	no	yes	no	no
As3mt	18.39075184	33.41175887	39.20041189	37.55279808	0.617942979	1.66E-06	0.272733188	0.020445458	no	no	no	no
Asah1	23.54308275	30.50330061	43.62104146	33.81440364	0.156146762	0.045577236	0.530505051	1.04E-06	no	no	no	no
Asah2	11.8923366	1.918983328	4.101618339	2.670869452	-2.904150292	6.41E-126	1.168182827	2.69E-17	no	no	no	yes
Asap1	8.828523446	10.7511106	8.539005848	9.845503989	-0.067356007	0.570222753	-0.186944801	0.147828265	no	no	no	no
Asap2	4.720640731	4.798820624	7.354587917	5.453349227	-0.235600839	0.047405835	0.70012443	5.88E-08	no	no	no	no
Asap3	11.60569272	11.86777977	20.91359548	17.97523086	-0.302724405	8.68E-05	0.953127142	6.94E-27	no	no	no	no
Asb1	6.150588094	8.907540453	9.218423864	7.098251472	0.184884127	0.261475082	0.188794926	0.41431272	no	no	no	no
Asb13	45.42211143	39.44311445	36.21337417	35.84447252	-0.469917404	2.98E-19	-0.049647622	0.504282456	no	no	no	no
Asb16	0.078470518	4.044580706	0.298023409	3.053252741	5.095882633	1.71E-26	-3.457691737	9.60E-27	no	yes	no	no
Asb2	1.984924667	6.506313063	3.746765064	3.674601222	1.367810659	3.22E-15	-0.653893847	0.000806013	yes	no	no	no
Asb3	5.738471021	6.936417169	6.811637909	6.388699263	-0.049459543	0.601114713	0.114815638	0.336289377	no	no	no	no
Asb4	0.880576495	1.34911177	1.460952781	3.575492088	0.237258189	0.540184689	0.282215508	0.606599983	no	no	no	no
Asb6	9.87776531	21.75696764	10.88885619	17.44974743	0.837492202	2.38E-14	-0.8763269	2.66E-14	no	no	no	no
Asb7	14.38168253	13.00888346	15.99490107	12.40246626	-0.456521227	1.08E-09	0.410430638	5.38E-06	no	no	no	no
Asb8	29.20841009	21.3257697	33.92595746	24.03815248	-0.731521286	3.82E-34	0.753178575	7.64E-26	no	no	no	no
Ascc1	8.126126603	13.1143848	8.915945611	11.84453906	0.495763001	2.97E-05	-0.500858657	0.000981944	no	no	no	no
Ascc2	19.3388766	25.91892231	17.32929361	25.4627508	0.169022894	0.016757417	-0.491609766	1.86E-09	no	no	no	no
Ascc3	23.13825872	30.79262153	31.36528415	31.39875923	0.192021993	0.078552636	0.056707775	0.690505738	no	no	no	no
Asf1a	7.933495025	15.6381097	10.17651014	15.11973767	0.729215806	1.20E-11	-0.547632676	1.84E-09	no	no	no	no
Asf1b	1.357029682	33.60472486	11.07850089	37.13861417	4.305922927	1.82E-145	-1.512317341	6.87E-40	no	yes	no	no
Asgr1	143.8275822	19.63113647	59.21073961	33.78971139	-3.183399633	3.75E-41	1.625438228	9.42E-08	no	no	no	yes
Asgr2	115.9800971	34.72563839	79.63883544	46.746267	-1.997588857	1.04E-73	1.233313435	4.69E-20	no	no	no	yes
Ash1l	30.66673407	35.06610067	32.82917423	33.63255016	-0.072942402	0.301268672	-0.031171337	0.713890918	no	no	no	no
Ash2l	17.2657784	35.04223286	23.16715206	32.01445861	0.759472801	2.10E-19	-0.520645872	7.77E-07	no	no	no	no
Asic5	5.395118308	0.048424638	0.151206944	0.196771996	-6.870293997	2.57E-51	0.927035823	0.233032465	no	no	yes	no
Asl	137.8931804	79.55328004	88.86620587	79.98068894	-0.914052572	2.65E-11	0.064511737	0.721776548	no	no	no	no
Asna1	36.47899885	52.66790348	41.05913835	49.56738212	0.322331289	0.003490674	-0.334252001	0.016808591	no	no	no	no
Asns	1.714117274	87.41504722	56.75390735	81.49428586	5.65441295	7.86E-61	-0.846449753	0.000454066	yes	no	no	no
Asnsd1	30.99017558	34.48607052	31.11190026	33.8600804	-0.070259891	0.305625256	-0.122835039	0.180568186	no	no	no	no
Aspa	9.754583911	5.290587916	11.60437485	5.058729492	-1.190961413	3.63E-21	1.232965634	3.26E-12	no	no	no	yes
Aspdh	109.1380423	38.76348326	44.58114316	31.77677853	-1.78909057	2.73E-75	0.279230513	0.087621645	no	no	yes	no
Aspg	94.56419904	46.51220233	43.88809247	50.49538515	-1.276002902	1.25E-57	-0.034650095	0.883170437	no	no	yes	no
Asph	9.736245437	19.68113858	21.33686961	18.5833138	0.747180609	2.78E-69	0.193117996	0.003589506	no	no	no	no
Aspm	0.631438122	31.02212843	9.309132701	25.66291549	5.355344007	0	-1.682000826	9.80E-59	no	yes	no	no
Aspn	0.328957156	8.257471808	2.856779449	8.751265504	4.277997589	2.36E-68	-1.367364901	2.39E-14	no	yes	no	no
Aspscr1	46.05693651	23.21990427	22.71869317	23.53013613	-1.301441477	1.29E-51	0.08679296	0.551156169	no	no	yes	no
Asrgl1	13.9865435	24.28476872	15.36962008	15.47828143	0.518670035	1.63E-08	-0.545131375	0.000286829	no	no	no	no
Ass1	100.7515351	55.1955602	63.39164248	63.40956699	-0.72236972	0.002161163	-0.171963579	0.581847322	no	no	no	no
Aste1	5.672594139	8.063185066	5.923438969	6.564641197	0.179743977	0.021822493	-0.299801722	0.000378637	no	no	no	no
Asun	16.17171988	30.47317713	23.42111047	32.45243706	0.660854093	6.24E-20	-0.315396342	0.000709089	no	no	no	no
Asxl1	18.84435781	32.91213354	27.35672643	31.91222062	0.518985525	3.98E-19	-0.183700612	0.013794136	no	no	no	no
Asxl2	18.66383515	26.95394265	20.55005428	25.72945011	0.235132728	0.00103612	-0.298483727	0.00054326	no	no	no	no
Atad1	30.75680241	36.35792468	26.25210767	37.94157165	0.031551616	0.69959152	-0.462433095	8.06E-11	no	no	no	no
Atad2	3.155619291	28.49138043	9.461391165	26.43591119	2.963136351	2.76E-125	-1.567635494	7.23E-49	no	yes	no	no
Atad2b	14.73165255	19.00603425	17.48299603	19.42622642	0.070084913	0.330549526	-0.019319339	0.846784623	no	no	no	no
Atad3a	26.90759307	54.37777984	18.76704151	53.19194424	0.909315332	1.35E-21	-1.625038418	4.30E-41	no	yes	no	no
Atad5	2.217089903	20.04084546	6.254200548	19.80801926	2.87229509	8.16E-101	-1.583800519	3.23E-46	no	yes	no	no
Atat1	9.628175488	4.085376433	10.29788422	4.408073982	-1.574588448	1.44E-24	1.470122496	6.04E-18	no	no	no	yes
Ate1	24.18418902	22.53887003	23.38832394	26.64360482	-0.396507395	5.45E-16	0.144344598	0.071618828	no	no	no	no
Atf1	21.86528387	26.38196546	18.42748983	23.27127362	0.017814785	0.86876161	-0.467764607	4.81E-05	no	no	no	no
Atf2	16.23198035	19.85409446	17.83431357	18.93841438	0.027739583	0.739895895	-0.095445833	0.081069192	no	no	no	no
Atf3	2.557667915	14.1936131	25.50991355	12.21943059	2.15955102	1.54E-09	0.885689583	0.011969695	yes	no	no	no
Atf4	77.59142611	73.26837058	82.6192179	64.06104332	-0.154371165	0.273338659	0.027724649	0.901055336	no	no	no	no
Atf5	82.97999286	45.77265696	62.18547903	39.83974579	-1.088462056	6.19E-51	0.455987633	0.000365662	no	no	yes	no
Atf6	39.39199652	23.21920764	34.3776281	25.87938614	-1.050827283	9.37E-83	0.651518894	1.14E-18	no	no	yes	no
Atf6b	19.80577814	22.25391465	16.16946473	21.59075893	-0.153127591	0.118171937	-0.330663172	7.90E-06	no	no	no	no
Atf7	8.644755347	11.1581648	7.454666675	9.93159423	0.078630971	0.470353528	-0.472008586	6.83E-07	no	no	no	no
Atf7ip	18.43450767	20.78874725	15.80028263	22.4641844	-0.140792995	0.127309266	-0.28123302	0.005380308	no	no	no	no
Atg10	6.568544047	3.774111026	3.321692443	2.622462421	-1.086870765	2.60E-23	-0.116835678	0.525003403	no	no	yes	no
Atg12	40.25506466	29.35183332	51.2172838	33.2912849	-0.746646867	5.76E-28	0.890726636	4.65E-30	no	no	no	no
Atg13	32.17644849	17.15459773	24.00849847	18.41807993	-1.214866237	6.03E-46	0.593711759	1.30E-10	no	no	yes	no
Atg14	15.85344042	10.11614847	11.62948932	10.62623059	-0.978844708	7.73E-21	0.328807285	0.005883228	no	no	no	no
Atg16l1	16.0322058	17.06604542	14.07224846	16.11960284	-0.202492983	5.65E-05	-0.188594598	0.006082744	no	no	no	no
Atg16l2	12.29091574	12.89555549	22.02919761	15.59522481	-0.269649805	0.104433159	0.907188829	1.98E-10	no	no	no	no
Atg2a	25.92765601	14.48344158	15.05721161	14.59443956	-1.168538348	3.84E-66	0.188214127	0.098866405	no	no	yes	no
Atg2b	16.08892753	22.69937838	15.90840757	21.28746927	0.222243943	3.68E-05	-0.420616586	4.23E-05	no	no	no	no
Atg3	25.73520071	13.61244755	13.0369842	13.36006687	-1.142438457	4.89E-41	-0.029256845	0.836376356	no	no	yes	no
Atg4a	14.76659702	9.17562987	13.66034225	7.523230822	-1.00066418	7.54E-15	0.692817504	9.89E-06	no	no	yes	no
Atg4b	23.10277166	26.91647506	20.46281659	24.22961555	-0.043680557	0.598590322	-0.316398076	0.000315606	no	no	no	no
Atg4c	8.434827156	5.861333291	6.326625038	6.237829845	-0.848707163	5.10E-22	0.216712108	0.05330197	no	no	no	no
Atg4d	24.39794213	14.33504953	19.99117499	15.87916832	-1.07366146	1.18E-42	0.568065935	4.12E-11	no	no	yes	no
Atg5	48.69232776	24.83098475	30.13358297	25.97231611	-1.218078835	3.09E-57	0.320770931	0.001724062	no	no	yes	no
Atg7	17.0896043	7.931002031	6.914635727	7.824901551	-1.375549049	3.10E-48	-0.092026842	0.536952282	no	no	yes	no
Atg9a	36.39554547	12.56882222	22.16402714	14.90077777	-1.860759729	6.92E-176	0.947234182	2.82E-22	no	no	yes	no
Atg9b	0.380366845	14.1033561	1.216749919	12.22112588	4.818605898	2.74E-186	-3.308723838	3.75E-52	no	yes	no	no
Athl1	37.82461929	16.09164005	28.089772	17.41051765	-1.545147529	1.49E-94	0.908151146	4.46E-15	no	no	yes	no
Atic	10.57897748	36.46471177	10.20728198	36.9450657	1.730183988	1.53E-42	-1.951648933	1.63E-40	no	yes	no	no
Atl1	1.554022801	2.448792615	3.937258799	2.29948563	0.327677901	0.028567749	0.844809735	5.58E-08	no	no	no	no
Atl2	30.07669432	25.04556381	23.37391365	24.8109096	-0.499431086	4.29E-11	-0.057312939	0.497003278	no	no	no	no
Atl3	66.67856727	30.24393533	44.75313026	27.93133734	-1.407448676	3.30E-104	0.626204397	1.78E-20	no	no	yes	no
Atm	9.065335747	21.72932266	8.946956473	21.22694189	1.006371189	8.76E-26	-1.220655091	1.60E-25	no	yes	no	no
Atmin	9.281643264	17.08262766	11.37273312	18.73963927	0.559040593	2.00E-19	-0.469503717	3.16E-08	no	no	no	no
Atn1	5.989413923	6.473029138	4.736153641	6.874285813	-0.235486443	0.136220515	-0.302998552	0.098750539	no	no	no	no
Atoh7	0	3.758942486	3.048480291	1.057971194	7.040363487	4.36E-10	-0.078608765	0.856335851	yes	no	no	no
Atoh8	24.86937189	0.516527426	0.73529958	0.523933961	-5.879351155	1.50E-92	0.606794156	0.204497015	no	no	yes	no
Atox1	52.47659921	60.82268221	52.58784246	63.66075736	0.279454681	0.214769601	-0.460769211	0.09172272	no	no	no	no
Atp10d	5.708888294	19.8220902	16.78484013	19.74570463	1.532110683	9.02E-126	-0.157353058	0.060374879	yes	no	no	no
Atp11a	4.428472567	7.171645761	11.96825049	15.23718015	0.351091511	0.014239448	0.87926843	7.42E-06	no	no	no	no
Atp11b	19.2310273	31.19894276	31.06787979	32.38419064	0.49314847	1.56E-08	0.009405584	0.938637075	no	no	no	no
Atp11c	69.49195505	19.77738228	15.9766707	18.35717735	-2.103023826	5.25E-98	-0.222937202	0.07754217	no	no	yes	no
Atp13a1	28.27081391	38.10968161	25.11860952	39.56526013	0.171203454	0.002907994	-0.547227038	4.66E-07	no	no	no	no
Atp13a2	11.78759068	17.98818973	15.3329165	17.30956015	0.308203823	0.000180115	-0.13008788	0.126603957	no	no	no	no
Atp13a3	61.72629796	56.50793221	49.00613806	61.52441623	-0.235006637	0.038786636	-0.296468796	0.033376735	no	no	no	no
Atp1a1	95.55084117	84.95352272	85.95309029	90.54006813	-0.126483813	0.503679421	-0.23688759	0.312652616	no	no	no	no
Atp1b1	40.49634872	39.79581667	34.00877397	35.94584467	-0.23578145	0.002691155	-0.211736954	0.128022561	no	no	no	no
Atp1b2	0.449162077	4.695887667	5.556879407	3.749578809	3.021010201	1.01E-31	0.38658401	0.223405781	yes	no	no	no
Atp1b3	31.5691584	47.45143276	32.42315742	50.62179691	0.372834525	5.36E-10	-0.541623705	1.28E-15	no	no	no	no
Atp2a2	71.98083681	65.26787819	52.99291183	69.72497328	-0.239438856	0.015036007	-0.4059485	0.001151334	no	no	no	no
Atp2a3	0.963022592	2.303368697	3.389572865	2.357155617	0.880846804	0.000437704	0.705755348	0.035916648	no	no	no	no
Atp2b1	26.47018873	25.14685933	26.18425099	23.53552608	-0.345468397	1.22E-11	0.131072764	0.077452291	no	no	no	no
Atp2b4	4.246446407	6.608467953	5.89952899	4.396308153	0.303657077	0.255116276	-0.005174754	0.989151665	no	no	no	no
Atp2c1	18.44652036	19.67584346	19.91312103	19.73843778	-0.143548578	0.058964314	0.070867867	0.576317267	no	no	no	no
Atp5a1	125.7510973	109.5151687	129.7891164	119.8038907	0.173402923	0.543905851	-0.331428776	0.345933975	no	no	no	no
Atp5b	155.8610974	132.2813637	164.3202289	147.9488647	-0.023438625	0.932369558	-0.38581716	0.363684317	no	no	no	no
Atp5c1	63.01618139	64.62321746	67.59356795	66.84589555	0.198588629	0.387193319	-0.304544345	0.296607899	no	no	no	no
Atp5d	103.2344703	90.17101216	91.52811506	88.6588346	-0.208318719	0.164219474	-0.177227586	0.40106668	no	no	no	no
Atp5e	76.06079755	58.84554091	60.64161851	65.71073843	-0.309204967	0.198794754	-0.233099646	0.444225101	no	no	no	no
Atp5f1	32.11558689	31.18675988	33.70448043	32.25049297	0.097960217	0.660477142	-0.223198386	0.432791405	no	no	no	no
Atp5g1	89.65800578	80.98611445	87.08143121	86.95924572	0.067155357	0.784837139	-0.318963729	0.271799478	no	no	no	no
Atp5g2	76.5270389	84.12874772	86.56977932	83.21299767	0.249516552	0.25170439	-0.280787944	0.309359259	no	no	no	no
Atp5g3	111.759949	105.8923638	110.5020788	115.5542494	0.273133835	0.330252617	-0.488963266	0.147860988	no	no	no	no
Atp5h	106.134764	101.1755961	111.4281097	109.0832889	0.102792079	0.667211789	-0.25424713	0.404255566	no	no	no	no
Atp5j	64.72476526	55.67115302	59.38412817	58.83979472	-0.16471568	0.353301383	-0.165658499	0.501472367	no	no	no	no
Atp5j2	17.61172598	20.29992542	20.3643956	20.40347842	0.345778049	0.100301869	-0.345923304	0.192469784	no	no	no	no
Atp5k	111.5187368	91.02273764	103.2719683	98.26682734	-0.216024327	0.253183373	-0.112504723	0.664599286	no	no	no	no
Atp5l	78.72454166	72.81332752	74.91898635	75.89105142	0.11091353	0.665825075	-0.384911507	0.213910659	no	no	no	no
Atp5o	101.5122627	100.0403936	110.423402	104.9429833	0.274906144	0.297936024	-0.347336968	0.301189739	no	no	no	no
Atp5s	6.09778994	10.90481391	9.775937992	9.358365603	0.546942403	4.31E-05	-0.061458694	0.663987223	no	no	no	no
Atp5sl	28.04745502	18.30768793	16.62581147	19.03008998	-0.9192277	3.78E-44	-0.022334261	0.871674536	no	no	no	no
Atp6ap1	56.75999813	45.19017718	53.95004955	47.64554328	-0.582390919	1.34E-40	0.303070648	1.08E-06	no	no	no	no
Atp6ap2	30.12533498	32.97681212	43.25825206	33.98420807	-0.066160808	0.490075896	0.408937989	2.42E-05	no	no	no	no
Atp6v0a1	22.56407383	13.3575905	20.35483192	14.91157335	-1.034844929	1.10E-29	0.690101336	1.72E-10	no	no	yes	no
Atp6v0a2	15.85677452	10.84022163	12.14202571	11.66743487	-0.83026761	1.98E-33	0.26761583	0.000443005	no	no	no	no
Atp6v0b	61.83008003	55.75672085	66.64460614	66.16788245	-0.393302357	2.44E-10	0.291555236	0.002460938	no	no	no	no
Atp6v0c	11.24236851	10.9401216	11.30392894	10.22059749	-0.247214703	0.031921624	0.024464007	0.904007515	no	no	no	no
Atp6v0d1	62.05464783	34.04853379	56.18097036	40.36196195	-1.1232484	1.15E-99	0.769762346	1.07E-23	no	no	yes	no
Atp6v0d2	8.008129332	10.68950525	9.734233704	19.76416341	0.101467118	0.863449839	-0.021222268	0.958020733	no	no	no	no
Atp6v0e	11.21412486	14.5805443	18.534923	14.32153897	0.17332616	0.029108803	0.340938077	0.000297806	no	no	no	no
Atp6v0e2	8.839598762	14.01961009	7.522159847	16.98316464	0.344244906	0.031653673	-0.753332954	5.70E-05	no	no	no	no
Atp6v1a	24.86282878	24.11936712	32.65786741	26.53915587	-0.286833774	2.41E-08	0.482433713	3.05E-11	no	no	no	no
Atp6v1b2	23.53633947	44.36902375	52.44631132	47.52942139	0.749145393	1.74E-20	0.201001909	0.121324224	no	no	no	no
Atp6v1c1	27.86321508	37.77513225	38.94550519	39.18533103	0.263543608	0.010001016	0.037269614	0.810831114	no	no	no	no
Atp6v1d	31.21855029	27.39946992	35.147172	27.23785539	-0.392585191	0.001009766	0.375947455	0.012143025	no	no	no	no
Atp6v1e1	71.65113479	69.92237354	88.12174572	76.71290305	-0.143158307	0.230624136	0.236915546	0.144785801	no	no	no	no
Atp6v1f	69.93735413	69.8006001	67.90948284	73.22694204	-0.175753625	0.125398194	-0.087853772	0.597731704	no	no	no	no
Atp6v1g1	81.20433906	71.27862522	96.60873132	83.19835979	-0.335742355	0.000300412	0.386243595	0.000596946	no	no	no	no
Atp6v1h	18.14085136	19.48574578	18.26831245	20.05221432	-0.070287255	0.561877052	-0.099223155	0.520135689	no	no	no	no
Atp7a	6.239615606	23.68640284	53.91673892	23.46277721	1.660744411	9.72E-116	1.256452693	6.62E-37	yes	no	no	yes
Atp7b	30.34048337	41.41852539	54.87365261	46.14387524	0.180986396	0.005458424	0.472534506	5.51E-07	no	no	no	no
Atp8a1	3.754531377	14.51866274	10.51196603	10.43985386	1.65446047	1.39E-44	-0.360116738	0.045189185	yes	no	no	no
Atp8a2	0.093308971	14.78514336	18.77289889	14.0534295	7.111736076	4.74E-150	0.376806731	0.016951418	yes	no	no	no
Atp8b1	37.19681078	17.73208552	28.62351662	25.31538273	-1.357838335	5.18E-39	0.785721298	4.20E-10	no	no	yes	no
Atp8b2	2.37231719	4.785511617	11.13146339	5.542548998	0.648262467	1.01E-10	1.364698192	1.78E-10	no	no	no	yes
Atp8b5	3.561702133	0.616511151	0.655071893	0.687841776	-2.978623628	4.14E-78	0.362415202	0.204770766	no	no	yes	no
Atp9a	36.70044184	8.398299872	20.39982961	11.76326551	-2.43735397	2.64E-80	1.379105464	1.15E-08	no	no	no	yes
Atp9b	16.73672232	15.85125939	14.69253976	15.6641131	-0.367584269	8.13E-09	-0.026828846	0.768080977	no	no	no	no
Atpaf1	17.99975004	35.91869297	23.464299	35.67439551	0.751048974	8.55E-27	-0.564253541	3.26E-08	no	no	no	no
Atpaf2	24.81257748	34.39925277	22.9835318	34.00740645	0.218378404	0.002949019	-0.519123958	2.90E-11	no	no	no	no
Atpif1	26.13674518	63.11907253	67.49860741	65.81182984	1.43940262	1.40E-12	-0.266108532	0.347982561	yes	no	no	no
Atr	7.794177494	27.37205216	11.45158261	25.43292176	1.593976058	1.48E-71	-1.227955118	1.82E-38	no	yes	no	no
Atraid	68.14606677	41.59809643	49.27176746	38.01189581	-0.924972617	3.63E-19	0.255037726	0.077445659	no	no	no	no
Atrip	6.709352836	12.99336922	8.455319948	10.78652631	0.626267289	7.70E-10	-0.476216976	0.000737437	no	no	no	no
Atrn	47.04042797	19.06556749	24.57098991	19.50539497	-1.611400148	3.90E-145	0.472806816	5.85E-12	no	no	yes	no
Atrnl1	25.80504851	12.52967129	17.02204767	9.849178354	-1.33160518	6.59E-57	0.51619129	3.62E-07	no	no	yes	no
Atrx	26.07436388	37.44352412	35.12431282	36.47588266	0.300260097	1.31E-08	-0.070814731	0.451308393	no	no	no	no
Atxn1	24.30864193	9.00845279	18.27081211	8.737136597	-1.757501285	1.45E-46	1.141013564	6.19E-24	no	no	no	yes
Atxn10	30.09436861	57.97551876	58.5074177	63.58785176	0.930870106	1.03E-10	-0.162903033	0.431769281	no	no	no	no
Atxn1l	17.52391357	17.64516333	21.12267768	18.69562389	-0.323150531	7.15E-06	0.395029935	8.42E-06	no	no	no	no
Atxn2	26.40104046	30.54400969	26.75456826	30.21147486	-0.054124592	0.641599755	-0.128069342	0.269192537	no	no	no	no
Atxn2l	19.54177374	32.5953807	24.80692847	30.90685929	0.446832859	1.59E-08	-0.302066255	0.002810325	no	no	no	no
Atxn3	19.72815321	29.28836166	15.1263445	28.79266345	0.299847016	5.55E-05	-0.878632813	9.46E-75	no	no	no	no
Atxn7	18.21042912	9.762269707	16.23400255	10.41454178	-1.242370632	3.58E-28	0.868818467	1.90E-13	no	no	yes	no
Atxn7l1	5.006543126	4.049640322	4.946506607	2.697134789	-0.643695376	3.29E-06	0.430078174	0.017370489	no	no	no	no
Atxn7l2	1.119928488	4.627965634	2.487596997	2.85021373	1.676908626	3.65E-18	-0.72537913	5.35E-07	yes	no	no	no
Atxn7l3	22.36905203	28.46083624	23.14620347	25.51818369	0.054025308	0.429728737	-0.214491978	0.078506873	no	no	no	no
Atxn7l3b	76.94234355	55.25945598	66.33875465	54.6444466	-0.714079791	8.02E-29	0.290994067	0.000102484	no	no	no	no
Auh	10.55867046	8.80725581	7.061712436	7.673087807	-0.540449457	4.53E-19	-0.249351161	0.001150821	no	no	no	no
Aup1	73.34113427	58.16200897	52.7979772	60.71886806	-0.499575115	5.52E-08	-0.197266001	0.133785022	no	no	no	no
Aurka	4.818465141	51.79549507	19.67415166	52.61806766	3.227272088	4.40E-192	-1.388591061	7.84E-45	no	yes	no	no
Aurkaip1	98.45874409	102.5233173	85.12182227	103.8084713	0.005777181	0.97222208	-0.433078809	0.015335583	no	no	no	no
Aurkb	0.729213667	46.61280038	11.19553011	42.72669562	5.687132879	5.37E-290	-1.992786014	1.76E-67	no	yes	no	no
Aven	19.48594754	27.47162654	15.06478025	28.76415669	0.24554083	9.65E-05	-0.808653812	2.32E-21	no	no	no	no
Avl9	21.8716042	19.02581186	26.15268119	19.98477032	-0.524610688	1.95E-11	0.575018264	3.72E-28	no	no	no	no
Avpi1	41.28876515	24.53166727	28.51355994	30.20784923	-0.995355349	3.35E-23	0.264546198	0.094218322	no	no	no	no
Avpr1a	37.54825526	3.747255995	6.624380326	2.229447922	-3.64217609	1.54E-121	0.929554788	0.000619114	no	no	yes	no
Awat1	0.048104331	3.364588216	1.304151446	3.982051468	5.620730849	1.62E-19	-1.256026238	0.002103523	no	yes	no	no
Awat2	2.53046004	3.837389774	0.44205424	3.675012223	0.352266784	0.013787739	-3.065427713	5.97E-31	no	yes	no	no
Axin1	15.95065992	26.6759067	17.15201543	24.44842313	0.44750185	5.39E-15	-0.524701402	5.31E-21	no	no	no	no
Axin2	4.959145328	0.228352843	0.421989716	0.239178059	-4.616411451	3.52E-28	0.8197414	0.139345347	no	no	yes	no
Axl	11.94254432	31.47152175	29.17796083	24.2780832	1.183034057	3.09E-26	-0.078146794	0.635561754	yes	no	no	no
Azgp1	182.9727799	9.734513365	24.05652948	17.7713829	-4.408915573	1.65E-15	1.129544535	0.071467719	no	no	yes	no
Azi2	31.68844174	23.19973209	26.87206666	23.90869393	-0.722498532	3.52E-39	0.281756008	5.73E-10	no	no	no	no
Azin1	51.29816737	37.44018956	37.88642399	37.76585341	-0.655430447	3.68E-10	0.014665229	0.907013362	no	no	no	no
B230118H07Rik	6.853999276	9.130358543	5.33956781	8.222082035	0.176717147	0.273632692	-0.715169822	0.000119057	no	no	no	no
B230219D22Rik	37.15269357	41.58171216	40.72529357	41.84731737	-0.09292554	0.312730402	0.022673923	0.769193664	no	no	no	no
B2m	60.28063643	37.21209934	62.57178479	41.4789721	-0.645755646	0.000157281	0.480512196	0.025530738	no	no	no	no
B3galnt1	5.056501286	17.90187624	22.90976543	10.45268624	1.426357091	2.69E-20	0.533512831	3.91E-05	yes	no	no	no
B3galnt2	16.99168115	21.7603243	13.22934755	20.67802253	0.096340203	0.092796956	-0.64473419	1.27E-15	no	no	no	no
B3galt1	32.28330241	0.620672796	1.892070164	0.662869922	-6.028992773	4.39E-160	0.431143	0.161935977	no	no	yes	no
B3galt2	3.661108517	7.623613667	6.917894244	6.823059628	0.692735177	5.61E-05	0.020597385	0.928515616	no	no	no	no
B3galt4	1.806954302	3.568415452	5.999557281	3.097684425	0.601495118	0.00030259	0.902467749	2.10E-08	no	no	no	no
B3galt6	4.83843272	11.66057529	4.694442518	9.832658724	0.950604881	2.60E-21	-1.168617656	1.74E-23	no	yes	no	no
B3gat3	20.70462667	11.61835769	19.34051189	12.30651971	-1.215623665	4.93E-27	0.898552872	2.08E-25	no	no	yes	no
B3gnt2	24.14224162	25.47458383	28.12730836	27.96076695	-0.185598502	0.019589001	0.204285642	0.001658869	no	no	no	no
B3gnt9	3.865675245	3.738183563	5.290271919	4.469119853	-0.374910188	0.021407941	0.623473795	0.000882244	no	no	no	no
B3gntl1	5.044761181	10.49080361	6.731281832	9.335965786	0.731964548	2.82E-12	-0.519553359	3.53E-09	no	no	no	no
B430306N03Rik	2.672324992	6.429502854	6.271157527	5.611851635	0.892387537	2.40E-09	0.121541084	0.578665197	no	no	no	no
B4galnt1	3.218257682	10.13738274	8.865938508	11.56002828	2.23052018	8.39E-19	-0.037717576	0.900980645	yes	no	no	no
B4galnt2	0.71648451	3.151681312	1.156974856	2.083359411	1.752262144	2.70E-17	-1.209203373	2.73E-08	no	yes	no	no
B4galnt4	0.150721085	5.977144672	0.535982058	1.792717216	4.953615355	5.67E-57	-3.039916488	2.46E-15	no	yes	no	no
B4galt1	44.71045245	36.62243169	70.82331209	47.39205157	-0.555750938	4.41E-20	1.013423615	9.24E-41	no	no	no	yes
B4galt2	0.273084883	12.58116663	4.559950607	14.14589842	5.195772339	7.40E-163	-1.305252639	2.92E-10	no	yes	no	no
B4galt3	10.16277237	16.04910979	17.11648659	17.12063759	0.340028554	7.37E-06	0.211367305	0.048068631	no	no	no	no
B4galt5	29.3870224	46.39955927	49.98390521	47.36000758	0.431778047	2.55E-09	0.129617509	0.556516045	no	no	no	no
B4galt6	1.285683568	22.45382168	9.285506791	24.31992609	3.815602289	1.75E-294	-1.171818292	1.16E-16	no	yes	no	no
B4galt7	12.34140229	9.44155803	11.71031399	8.572677916	-0.724225757	4.84E-18	0.462996086	0.000123346	no	no	no	no
B630005N14Rik	9.252281357	9.780860952	16.82776394	11.23715084	-0.237706438	0.038786636	0.895363647	2.20E-19	no	no	no	no
B930041F14Rik	0.94598235	18.68770115	3.784092999	6.963521046	3.96039216	8.66E-130	-2.135491412	9.53E-22	no	yes	no	no
B9d1	2.41762489	8.739155283	5.711479067	7.029468907	1.489834106	4.72E-09	-0.50205206	0.118941213	yes	no	no	no
B9d2	5.457738797	8.737870752	5.94947257	4.130981021	0.339787812	0.034222502	-0.45002247	0.027553169	no	no	no	no
BC003331	27.077735	26.56369606	27.57761908	28.29410892	-0.290864844	0.001497816	0.129286297	0.237433435	no	no	no	no
BC003965	21.2189455	27.07288119	14.72484936	25.24860011	0.106814554	0.105334624	-0.833823977	3.68E-31	no	no	no	no
BC004004	29.37446275	27.07757372	40.73812607	30.08534719	-0.339269884	1.18E-05	0.618585349	2.96E-09	no	no	no	no
BC005537	79.81654778	54.4095771	67.17308322	63.33698824	-0.709785355	1.75E-14	0.252894022	0.017770662	no	no	no	no
BC005561	22.16379533	20.15448763	22.55190304	20.35640043	-0.45916024	8.41E-05	0.280746534	0.014596892	no	no	no	no
BC005624	28.5915898	30.25432085	25.17055328	26.9188194	-0.176085421	0.096029915	-0.174739494	0.173167301	no	no	no	no
BC017158	14.24623187	21.99033892	12.14473531	18.86582921	0.33137223	1.69E-05	-0.747113304	1.25E-21	no	no	no	no
BC017643	14.68572341	17.14516981	23.49908579	17.69193289	-0.100602033	0.085563472	0.580571637	1.03E-19	no	no	no	no
BC021614	217.9816438	80.92013089	135.3720486	105.0027367	-1.619346792	7.86E-65	0.693698455	7.21E-08	no	no	yes	no
BC021891	6.691843379	0.538810057	1.929683729	0.219475993	-3.894835715	5.28E-125	1.845769591	7.99E-11	no	no	no	yes
BC023829	21.95999673	25.83970184	21.43308039	26.81682523	-0.050668525	0.533520985	-0.173300055	0.050966005	no	no	no	no
BC024139	6.910734121	1.832688628	0.488012703	0.7541696	-2.248763672	2.98E-35	-1.612192906	1.06E-07	no	yes	yes	no
BC026585	19.56367986	7.621245281	9.099385095	11.86323586	-1.618018677	1.04E-18	0.327527524	0.208539054	no	no	yes	no
BC027231	7.529967133	16.87642251	8.132477046	14.69201121	0.869038315	3.79E-26	-0.95521294	1.42E-43	no	no	no	no
BC028528	4.607956096	6.437129941	6.531946318	6.641568698	0.199464391	0.190098537	0.060920027	0.753057407	no	no	no	no
BC029214	51.61974159	11.2915595	25.55437944	10.75918974	-2.547953902	6.59E-114	1.304655114	2.17E-25	no	no	no	yes
BC030307	4.327035151	2.149733106	3.41851351	2.514346474	-1.285285783	1.68E-24	0.746725791	1.37E-05	no	no	yes	no
BC030336	13.72738086	23.01536408	13.62821653	19.16539919	0.464233774	2.71E-05	-0.671871416	4.82E-25	no	no	no	no
BC030867	0.262737439	9.629699117	1.401638845	10.19894767	4.766621193	1.85E-117	-2.549794889	3.42E-66	no	yes	no	no
BC031181	67.3047851	43.75277724	56.9213345	50.22267334	-0.87494516	4.00E-33	0.411478294	1.89E-05	no	no	no	no
BC037034	13.07748605	11.4789003	12.38756007	11.03098227	-0.548096738	6.05E-06	0.265647599	0.063837269	no	no	no	no
BC048403	2.85880261	7.987999865	2.196004748	8.163374263	1.130932966	2.56E-29	-1.702911521	6.32E-43	no	yes	no	no
BC048671	5.423817114	4.184480124	4.997987799	7.203084906	-0.599234133	0.01163922	0.269706052	0.375305304	no	no	no	no
BC052040	4.507567208	11.44913482	9.49087626	12.06581894	1.052240531	8.90E-35	-0.157365003	0.059166941	yes	no	no	no
BC055324	1.028698237	12.41537431	3.194191966	10.87526764	3.284776819	6.60E-81	-1.872830903	1.89E-30	no	yes	no	no
BC068281	7.267894653	13.53199919	9.247350641	14.88363955	0.578894927	6.19E-13	-0.416519853	0.000272388	no	no	no	no
BC089597	81.1863676	0.854298668	2.75747934	1.337878825	-6.860195764	9.51E-81	1.73778275	3.51E-05	no	no	no	yes
Baat	133.4060561	9.146009192	66.44717025	14.59613605	-4.127200995	3.17E-49	2.768175193	1.09E-15	no	no	no	yes
Babam1	40.26890518	38.64257152	32.06289948	37.96150033	-0.274764399	0.004936418	-0.232761771	0.058702281	no	no	no	no
Bace1	40.07867363	43.44469638	44.81613174	41.7676192	-0.148011892	0.000191545	0.098336205	0.193293779	no	no	no	no
Bace2	3.824596706	1.040640818	1.459255556	0.91392495	-2.082946431	2.19E-30	0.509791941	0.116059908	no	no	yes	no
Bach1	30.64792053	36.21366052	34.38739133	24.85524045	-0.043390918	0.553299534	0.008248403	0.952607835	no	no	no	no
Bach2	8.144405817	0.507304732	1.002417717	0.550750928	-4.185185299	3.29E-143	0.919367412	0.000776355	no	no	yes	no
Bad	14.57749685	13.60106313	15.28812455	12.72697711	-0.42680608	0.001121061	0.290006764	0.036915446	no	no	no	no
Bag1	58.28407416	58.86271294	50.47695956	54.97276645	-0.098234605	0.411184289	-0.312387685	0.027144369	no	no	no	no
Bag2	4.931092648	42.03417607	20.78201231	43.14590899	2.840871659	7.61E-179	-0.940712127	5.32E-12	yes	no	no	no
Bag3	22.30192553	18.98132866	18.00264596	21.09695958	-0.537538115	1.83E-08	0.03284627	0.818424625	no	no	no	no
Bag4	29.80779738	31.91586072	24.56411681	32.83257447	-0.174601066	0.012167746	-0.304945047	0.000388548	no	no	no	no
Bag5	22.04298073	26.27734688	16.79158601	24.17846985	-0.042779387	0.59855941	-0.554221471	3.20E-09	no	no	no	no
Bag6	39.09278024	49.68282985	41.19922535	50.4620232	0.096733774	0.140128497	-0.232935865	0.000776702	no	no	no	no
Bahcc1	4.641169709	11.78098258	4.462029201	9.932321643	0.972161611	1.76E-11	-1.214698684	1.06E-08	no	yes	no	no
Bahd1	7.237731179	12.314265	10.60253297	10.96165677	0.413075464	1.63E-05	-0.055831627	0.701565471	no	no	no	no
Baiap2	19.81549205	23.22890668	27.72414815	21.25959563	-0.037104394	0.694173773	0.329082749	0.00107817	no	no	no	no
Baiap2l1	15.82532437	15.83618559	25.71930725	18.43753495	-0.324721205	0.000816164	0.816774624	2.08E-18	no	no	no	no
Baiap2l2	0.019097391	25.1132843	13.96690758	13.39057559	9.446901187	5.69E-56	-0.760171881	0.007278134	yes	no	no	no
Bak1	14.95611112	23.96578455	22.89261825	24.38827871	0.370151617	1.32E-07	0.030689868	0.801258728	no	no	no	no
Bambi	3.891634734	1.234261071	1.65877119	1.37279555	-1.961806843	6.70E-70	0.553098875	0.017098118	no	no	yes	no
Banf1	30.21126022	71.17011347	34.45155294	65.37107022	1.148181353	2.90E-20	-1.155925805	2.58E-12	no	yes	no	no
Bank1	1.649660055	3.219006975	2.705530701	1.309047076	0.696517692	3.98E-08	-0.172735983	0.394649485	no	no	no	no
Banp	4.26272691	7.040747806	7.409417774	8.482481112	0.414253225	0.018264407	0.191537858	0.365678952	no	no	no	no
Bap1	30.03176876	47.46280171	34.22938475	47.70121843	0.39216138	2.32E-18	-0.40443764	3.00E-15	no	no	no	no
Bard1	0.614753416	13.06242238	3.464429802	10.44378753	4.068743483	2.41E-184	-1.769738219	3.18E-43	no	yes	no	no
Basp1	0.908649451	4.487612937	11.37142468	4.951343275	1.899548438	1.89E-24	1.462495335	1.94E-07	yes	no	no	yes
Bax	16.02377329	36.88616137	24.82862518	35.19541805	1.091349341	1.81E-14	-0.607477126	0.000179673	yes	no	no	no
Baz1a	9.228471788	25.74842063	13.37045012	23.37588756	1.24994466	5.48E-49	-0.891467281	4.12E-09	yes	no	no	no
Baz1b	36.04128753	51.93758624	37.18837067	50.94867933	0.325497082	5.98E-11	-0.481750961	7.76E-13	no	no	no	no
Baz2a	19.77303016	27.48309799	23.5384029	27.55300331	0.176762124	0.024214082	-0.130267076	0.236052628	no	no	no	no
Baz2b	11.37509693	12.01373879	18.49378081	10.76778169	-0.238548563	0.000366574	0.749462791	1.39E-15	no	no	no	no
Bbc3	7.164592007	12.45768075	10.87009117	8.974175926	0.490636703	0.032152242	-0.098539516	0.703200696	no	no	no	no
Bbox1	93.36688645	15.47597563	40.42560137	21.8144979	-2.859049159	1.11E-51	1.407362339	2.75E-09	no	no	no	yes
Bbs10	10.83411774	4.793725462	5.979941453	4.681337533	-1.536149631	9.07E-34	0.473297656	0.004650921	no	no	yes	no
Bbs12	1.758384864	13.792575	3.776617444	11.26830489	2.632482943	1.42E-59	-1.738050519	1.85E-48	no	yes	no	no
Bbs2	2.560601201	3.626821162	2.941586576	3.217652477	0.261852008	0.060006845	-0.195927258	0.302988749	no	no	no	no
Bbs4	6.683735872	6.766193955	5.149652869	5.430068076	-0.216644417	0.042929867	-0.316717305	0.011646171	no	no	no	no
Bbs5	3.824279001	8.726113192	5.330541413	9.018200379	0.955523827	2.95E-06	-0.662234219	0.003843158	no	no	no	no
Bbs7	3.541856833	9.270703349	6.869774259	4.286808807	1.099941686	3.21E-20	-0.331445135	0.049356206	yes	no	no	no
Bbs9	3.001155617	4.633198613	3.642405291	3.650895693	0.35422013	0.005713436	-0.259475503	0.153863531	no	no	no	no
Bbx	10.56231516	18.2450444	24.69322453	13.30222089	0.46635666	8.25E-12	0.570375754	2.88E-09	no	no	no	no
Bcam	3.638837049	5.830045427	8.494405353	9.782771355	0.410797073	0.078515214	0.658178963	0.000232454	no	no	no	no
Bcap29	11.34361054	33.97845838	8.522610584	28.20177431	1.353712102	3.30E-30	-1.977996321	1.36E-82	no	yes	no	no
Bcap31	72.44747922	51.48820605	53.26615104	53.11651797	-0.607929494	9.55E-06	-0.02732426	0.899935744	no	no	no	no
Bcar1	22.54375227	11.47162708	20.59024457	13.33892955	-1.295576619	2.10E-65	0.96450504	1.44E-25	no	no	yes	no
Bcar3	38.94476064	18.90438096	21.0418741	22.1535356	-1.339330744	1.49E-124	0.263308374	0.004509865	no	no	yes	no
Bcas2	20.38775764	37.98224821	24.70486157	39.32918247	0.706614829	2.14E-25	-0.608898939	3.05E-13	no	no	no	no
Bcas3	13.54210581	6.82517092	8.890431929	6.439881317	-1.274295774	3.36E-61	0.469568941	5.51E-06	no	no	yes	no
Bcat2	20.09109733	14.66081317	15.49788805	9.758182099	-0.801476408	1.02E-18	0.218275647	0.015033288	no	no	no	no
Bccip	44.0735838	41.96961491	24.98904282	41.13673264	-0.240342581	0.048957475	-0.761621198	3.75E-08	no	no	no	no
Bcdin3d	7.521558154	15.29715238	5.443515744	13.49249071	0.695385257	1.50E-07	-1.354153554	6.97E-21	no	yes	no	no
Bche	62.93227148	28.47712766	62.41565149	16.3225107	-1.42917732	2.14E-33	1.20390288	1.74E-32	no	no	no	yes
Bckdha	25.85129141	12.78444037	16.01583438	13.40477451	-1.136957661	2.44E-13	0.22164718	0.30285586	no	no	yes	no
Bckdhb	54.90139469	26.23096814	24.71778885	24.28894562	-1.315768487	2.01E-38	-0.021871089	0.931926662	no	no	yes	no
Bckdk	15.20334225	39.04320679	23.48493051	35.63552757	1.136919624	1.61E-35	-0.702936319	1.39E-14	yes	no	no	no
Bcl10	8.498087755	7.299657064	14.87007581	7.657225644	-0.531151206	1.11E-14	1.134685786	4.53E-25	no	no	no	yes
Bcl2a1b	0.964144867	9.42199945	12.31918714	11.50181577	2.775561903	5.75E-25	0.592939985	0.005352092	yes	no	no	no
Bcl2l1	25.66447502	16.25091113	28.28993497	15.71509505	-0.980282787	8.52E-17	0.900861609	5.36E-12	no	no	no	no
Bcl2l11	5.13041315	7.65206899	10.70090385	8.532904671	0.207158365	0.220593089	0.646376157	0.001716736	no	no	no	no
Bcl2l12	5.991032171	9.717613425	7.716347978	8.078197097	0.373505445	0.00213215	-0.185666528	0.247267409	no	no	no	no
Bcl2l13	19.41851014	19.49196468	20.44945507	21.20251981	-0.294149693	7.93E-11	0.171471834	0.014596892	no	no	no	no
Bcl2l2	24.2086544	12.67478403	17.50765096	12.58631439	-1.267822648	3.00E-54	0.59158102	5.72E-09	no	no	yes	no
Bcl3	16.34096638	9.260398556	23.4079082	13.769271	-1.161687177	2.86E-14	1.47115	8.95E-13	no	no	no	yes
Bcl6	25.90827545	4.847198802	10.95440995	7.475117895	-2.753306963	8.67E-33	1.287460217	1.10E-07	no	no	no	yes
Bcl6b	2.687490348	4.484048125	4.409618175	4.641158316	0.393233628	0.004751438	0.121603037	0.468616339	no	no	no	no
Bcl7a	6.093736027	14.60948186	5.519899006	13.02998541	0.926652052	1.95E-21	-1.262679149	3.64E-28	no	yes	no	no
Bcl7b	11.94835002	12.01266793	13.13255246	10.26311121	-0.291480959	0.00810057	0.232380423	0.034462285	no	no	no	no
Bcl7c	2.77749703	7.262376957	4.312739376	7.496637589	1.100298043	1.50E-32	-0.658569375	8.48E-06	yes	no	no	no
Bcl9	3.379698496	11.44248162	5.777959863	10.13754582	1.418423422	1.52E-26	-0.844826969	1.17E-06	yes	no	no	no
Bcl9l	17.26160377	10.73941744	13.02786841	11.64711902	-1.058717237	1.01E-16	0.448738849	0.017927882	no	no	yes	no
Bclaf1	38.88562382	66.62296492	55.07081031	61.93559772	0.656494342	3.12E-10	-0.350369234	0.001314022	no	no	no	no
Bco2	19.31836719	3.421162149	6.833094199	2.328387048	-2.775242116	6.17E-103	1.057671546	0.00187764	no	no	no	yes
Bcor	10.76717814	20.2103756	17.19789366	18.91264767	0.624631937	5.01E-13	-0.138808471	0.121971688	no	no	no	no
Bcorl1	5.197410341	8.501944645	7.732861489	8.41004496	0.356547161	0.00194367	0.014629158	0.938716908	no	no	no	no
Bcr	17.89201534	17.20045383	19.28131657	19.67387781	-0.348219648	3.13E-07	0.26373127	0.003783149	no	no	no	no
Bcs1l	20.99049609	31.93150214	18.47607531	31.68996674	0.319021728	1.53E-06	-0.722845758	2.90E-16	no	no	no	no
Bdh1	89.69852661	20.11751936	41.25830017	35.09338458	-2.424922449	1.25E-47	1.073134593	6.91E-06	no	no	no	yes
Bdh2	13.37256191	16.86663671	9.644761533	9.914993774	0.082164315	0.713954292	-0.757725199	0.007356312	no	no	no	no
Bdp1	14.02734568	30.65670365	16.73132036	28.14656144	0.877751596	4.19E-45	-0.823757939	1.34E-45	no	no	no	no
Becn1	32.7003047	29.59296674	28.2928445	27.15608902	-0.368806668	8.36E-07	-0.04289768	0.650128359	no	no	no	no
Bend3	6.067773007	21.51336788	6.268720855	18.39386754	1.524132433	1.77E-64	-1.659824035	6.18E-58	no	yes	no	no
Bend7	10.42059725	8.446785409	11.28317943	8.640232692	-0.642031393	1.92E-11	0.574600024	0.001072899	no	no	no	no
Bet1	51.3395208	25.29087027	57.18902557	32.11458034	-1.293793994	1.37E-45	1.244501599	1.04E-40	no	no	no	yes
Bet1l	33.26195264	27.15237057	43.62537979	24.88094456	-0.605345732	4.68E-15	0.792243023	3.53E-17	no	no	no	no
Bex1	1.079789284	97.45469093	116.1370476	95.70665956	6.614139157	3.93E-97	-0.143811729	0.651962086	yes	no	no	no
Bex2	0.491840859	71.76307361	92.63209493	81.42284704	6.980194874	2.57E-153	0.278894117	0.103404892	yes	no	no	no
Bex4	1.819148141	78.40944732	84.05779093	84.24204745	5.469547145	7.67E-118	-0.16062439	0.539959948	yes	no	no	no
Bfar	45.73112922	33.53699321	41.89667856	35.81677462	-0.717279895	1.39E-29	0.385735998	4.61E-09	no	no	no	no
Bglap3	4.021265576	1.045739147	3.113820188	1.055062117	-2.233163832	1.67E-18	1.551426554	1.31E-05	no	no	no	yes
Bgn	41.89763868	28.92556823	32.71385231	29.41696725	-0.811044357	5.59E-13	0.232305791	0.245878422	no	no	no	no
Bhlha15	0.823034928	11.10691242	10.80797288	14.72620503	3.358230837	3.16E-30	0.127214895	0.649453023	yes	no	no	no
Bhlhb9	4.213205347	21.09246474	17.37235167	21.90015934	2.064907165	1.19E-65	-0.221534704	0.015979619	yes	no	no	no
Bhlhe40	64.85285584	18.91371884	32.82198748	29.28647499	-2.11613995	1.60E-51	0.919025576	1.07E-14	no	no	yes	no
Bhmt	68.70582709	34.25297666	88.29675705	35.91375921	-1.121025375	2.41E-13	1.257422824	2.18E-12	no	no	no	yes
Bhmt2	100.289523	20.85049339	77.01737051	47.13218274	-2.552296416	4.76E-37	1.92225364	2.23E-15	no	no	no	yes
Bicc1	1.178207103	20.25854399	25.48220033	18.60829468	3.830115056	0	0.419716395	0.010908684	yes	no	no	no
Bicd1	0.074305089	3.534189595	1.024244953	1.008051514	5.144101888	5.43E-104	-1.559766452	6.35E-06	no	yes	no	no
Bicd2	12.86237614	18.60747718	13.4839153	15.12548978	0.230261552	3.09E-06	-0.360702494	1.09E-09	no	no	no	no
Bid	15.1645908	31.1457066	23.16525929	34.27180822	0.783664829	1.56E-27	-0.366475639	0.000240158	no	no	no	no
Bik	10.90484656	8.201934523	10.00660155	9.724020075	-0.747195329	9.68E-06	0.416721439	0.017200604	no	no	no	no
Bin1	10.17994563	24.90598842	18.40277706	24.59503061	1.05511999	4.66E-20	-0.357873241	0.010331122	yes	no	no	no
Bin3	16.8770497	23.38251975	21.98468716	18.44575744	0.192960565	0.035486469	0.002238888	0.987128302	no	no	no	no
Birc2	33.2310658	30.20771116	60.92804767	30.61705678	-0.406521875	5.56E-13	1.083100306	1.25E-108	no	no	no	yes
Birc3	13.76562288	15.63730925	33.93545461	14.07918285	-0.109842163	0.145172386	1.206298735	2.38E-45	no	no	no	yes
Birc5	1.850682669	28.8006657	11.26863536	29.20094642	3.819051225	1.12E-204	-1.399017097	1.19E-36	no	yes	no	no
Birc6	34.79746387	40.46321701	35.54028926	41.06443281	0.045356324	0.595119085	-0.218188418	0.022997597	no	no	no	no
Bivm	14.93621273	19.77684833	15.29414989	18.12982512	0.113040977	0.227176971	-0.272230363	9.96E-05	no	no	no	no
Blcap	28.41157465	18.74533099	22.48328979	16.61362258	-0.921518438	9.68E-21	0.390007954	0.001991357	no	no	no	no
Blm	2.736215641	23.98712995	5.796337215	23.03447291	2.863301235	7.81E-80	-2.003937903	1.24E-65	no	yes	no	no
Blmh	38.31777651	54.82838237	40.88598635	49.88507995	0.330915706	0.000562666	-0.437327303	0.00010668	no	no	no	no
Blnk	1.201205071	2.377371616	2.671877547	3.114392613	0.695063961	0.002009219	0.2753777	0.25650422	no	no	no	no
Bloc1s1	61.23623055	45.78485495	54.46942682	42.58744815	-0.634580824	2.58E-06	0.271667397	0.101978992	no	no	no	no
Bloc1s2	24.23018321	39.7350945	30.67473928	41.04658806	0.460405106	2.08E-06	-0.32283241	0.008705555	no	no	no	no
Bloc1s3	10.38015894	9.452178704	9.798778256	8.272480343	-0.438817293	1.59E-05	0.167781539	0.082769354	no	no	no	no
Bloc1s4	14.76311246	15.8308066	11.91372626	17.38935386	-0.248300549	0.04943853	-0.258846043	0.095648615	no	no	no	no
Bloc1s5	34.28615114	23.28718782	24.24733208	20.73030546	-0.801188264	5.46E-33	0.11173963	0.360030177	no	no	no	no
Bloc1s6	17.34374956	18.82689649	18.23830904	16.63445587	-0.166267898	0.007343476	0.042674549	0.574918554	no	no	no	no
Blvra	11.79875141	22.8271563	15.63293335	20.19994197	0.740498262	8.82E-11	-0.500974307	0.000402676	no	no	no	no
Blvrb	62.4068419	31.11857841	36.38923124	22.9287986	-1.11977038	6.98E-09	0.129086126	0.652676561	no	no	yes	no
Blzf1	8.778241966	13.94084357	13.52029362	12.81692008	0.374818955	0.000154754	0.072173574	0.621084727	no	no	no	no
Bmf	20.27822333	6.546646834	31.39501378	13.01761106	-1.986174315	1.91E-17	2.379010004	9.39E-72	no	no	no	yes
Bmi1	21.59822908	31.70835525	28.03336903	28.46693076	0.308125069	0.001850966	-0.124192789	0.108230014	no	no	no	no
Bmp1	37.76411232	7.036715019	25.24224564	11.65322913	-2.713646551	7.75E-128	1.920546086	3.28E-35	no	no	no	yes
Bmp10	7.375438591	0.296413205	0.38235208	0.364256455	-4.952817309	6.72E-53	0.36386297	0.627821234	no	no	yes	no
Bmp2	17.35197526	1.308493331	2.434644694	1.069230653	-4.030235495	5.36E-44	0.945238391	0.025155756	no	no	yes	no
Bmp2k	6.348064896	6.534042173	7.319647062	6.091562107	-0.352230585	0.028618858	0.350193561	0.05077338	no	no	no	no
Bmp4	6.706072259	1.25126652	2.722474871	0.972890823	-2.760741448	4.88E-28	1.204683567	0.001695302	no	no	no	yes
Bmp5	11.6896856	1.960773185	2.660233886	1.642632606	-2.890111924	1.80E-59	0.523295138	0.115807142	no	no	yes	no
Bmp6	5.678313375	0.642014987	1.078438561	0.609419046	-3.388026304	1.41E-54	0.792078117	0.028479854	no	no	yes	no
Bmp7	1.030213314	1.926448652	1.314502867	9.907200859	0.458998419	0.01406022	-0.232008562	0.581512995	no	no	no	no
Bmp8b	0.660917187	4.13214927	2.051166315	3.170982494	2.206190728	1.18E-12	-1.726499003	1.20E-06	no	yes	no	no
Bmpr1a	27.84528361	39.0918654	43.63493337	45.28976374	0.24931788	0.001810791	0.203172596	0.001658869	no	no	no	no
Bmpr2	29.78622125	25.01508333	25.86598323	24.32816431	-0.537224686	3.44E-19	0.140991196	0.026701507	no	no	no	no
Bms1	21.04032486	47.0620703	23.21212077	44.72060761	0.969859211	2.18E-33	-1.026891794	2.27E-37	no	yes	no	no
Bmyc	3.933759995	19.80087675	3.821068947	7.351999578	1.944845946	4.15E-25	-2.131016166	3.49E-29	no	yes	no	no
Bnip1	9.326040983	10.76202272	8.802504984	10.84662717	-0.068457249	0.37224806	-0.186477228	0.033792624	no	no	no	no
Bnip2	22.15947325	12.39837501	18.06561332	12.76097881	-1.131841634	5.89E-88	0.652046474	2.76E-12	no	no	yes	no
Bnip3	91.8286863	70.46639584	93.36631845	83.46562939	-0.476831515	5.95E-05	0.295013433	0.057751344	no	no	no	no
Bnip3l	60.14701765	42.81002542	65.58707323	40.97963362	-0.716026579	3.73E-09	0.635494419	1.76E-06	no	no	no	no
Bod1	31.15890319	38.93293222	23.63972299	37.77058143	0.084041243	0.293491994	-0.682664594	1.62E-14	no	no	no	no
Bod1l	18.48196296	29.58732476	23.99919845	29.59010229	0.405721664	3.91E-23	-0.225998345	9.04E-05	no	no	no	no
Bok	11.04053081	14.93643114	8.273327325	10.43534089	0.145443214	0.448171067	-0.710950876	0.002040106	no	no	no	no
Bola1	39.38535446	40.05554573	18.02588257	31.88028533	-0.243233547	0.029288999	-1.088221631	2.17E-16	no	yes	no	no
Bola2	62.41343441	105.9993254	68.14171782	98.09628804	0.697265073	1.87E-06	-0.790754276	1.04E-06	no	no	no	no
Bola3	42.35535358	44.75708105	27.41844488	44.26358525	-0.129111836	0.251856686	-0.69356092	6.69E-07	no	no	no	no
Bop1	30.38500027	59.70183064	17.13178174	57.0955088	0.772022595	3.76E-15	-1.791526018	7.88E-39	no	yes	no	no
Bora	8.00732091	25.79275502	10.38048253	21.99050251	1.407820896	3.85E-68	-1.240251984	7.60E-71	no	yes	no	no
Bpgm	15.48535644	16.58856547	21.97377945	15.1004161	-0.187673232	0.29266955	0.473049839	0.043646714	no	no	no	no
Bphl	47.16460345	22.2379705	33.56501288	24.70276501	-1.303327493	2.56E-78	0.610305941	2.45E-15	no	no	yes	no
Bpnt1	50.02187521	56.35946798	39.998364	58.1084078	0.006591702	0.946782168	-0.530099745	4.85E-07	no	no	no	no
Bptf	16.38916502	28.82205522	21.88321536	27.279101	0.54567783	1.60E-17	-0.335351825	1.62E-07	no	no	no	no
Braf	15.710128	19.05514773	16.54155753	19.09036831	-0.026076779	0.779519808	-0.091999209	0.348360954	no	no	no	no
Brap	60.63286137	27.52134765	35.35639353	31.23054759	-1.427291307	3.11E-100	0.440455766	2.55E-09	no	no	yes	no
Brat1	10.24114918	13.32351343	11.44310276	13.02695032	0.057068631	0.502461124	-0.083583706	0.467073914	no	no	no	no
Brca1	1.867373997	22.79260788	9.870052845	22.80810665	3.307424835	2.92E-95	-1.107357045	5.71E-45	no	yes	no	no
Brca2	4.213603412	20.92497626	5.573587981	17.47733399	1.998905092	2.12E-64	-1.800186255	1.08E-124	no	yes	no	no
Brcc3	11.08744196	15.84736949	10.71828705	15.18189476	0.215003659	0.083187606	-0.467486865	2.39E-08	no	no	no	no
Brd1	15.82401716	21.10236636	22.28565071	20.40337329	0.113306605	0.086466365	0.184125056	0.019544474	no	no	no	no
Brd2	50.0375809	52.82124427	53.91327806	49.19375782	-0.143427844	0.04739778	0.03330348	0.753735795	no	no	no	no
Brd3	19.93928083	28.32111022	25.9827178	23.09144224	0.200610778	0.001539476	-0.02602384	0.815094626	no	no	no	no
Brd4	20.19747876	22.75708036	19.84478585	22.46368445	-0.124982334	0.338293034	-0.105010777	0.530860005	no	no	no	no
Brd7	17.49172075	28.12455966	17.68636977	27.92611901	0.484632497	1.40E-12	-0.655047637	1.42E-15	no	no	no	no
Brd8	9.104069126	22.91119559	17.60080898	22.25768521	1.081821764	3.07E-94	-0.328643968	5.41E-08	yes	no	no	no
Brd9	7.377217714	12.82242492	11.69859184	11.88305718	0.521489721	6.55E-11	-0.045511475	0.641576248	no	no	no	no
Bre	10.1289682	10.47261851	7.987398764	8.999684708	-0.150186141	0.10670652	-0.380971682	0.000706842	no	no	no	no
Brf1	14.84846022	17.83040044	14.16555221	16.81346396	0.004795391	0.960662529	-0.232627183	0.022400157	no	no	no	no
Brf2	8.395166059	10.20915909	8.810998739	9.080689846	-0.027790889	0.792589465	-0.086782	0.435102779	no	no	no	no
Bri3	13.21874124	10.17422334	9.578682241	10.99701114	-0.638334339	1.24E-16	-0.013572113	0.90626942	no	no	no	no
Bri3bp	26.81437541	35.76666534	15.9609609	34.18773576	0.158733086	0.000287015	-1.115799868	6.12E-49	no	yes	no	no
Brip1	2.635964315	12.45583607	5.758999054	13.32303001	1.930258805	6.14E-72	-0.994053326	5.88E-23	yes	no	no	no
Brix1	19.81990639	38.61151697	20.41864875	36.11170776	0.784965923	1.09E-20	-0.931494693	2.52E-26	no	no	no	no
Brk1	60.71802417	55.59021684	59.65396598	59.18739142	-0.343100416	3.70E-07	0.1002883	0.283822573	no	no	no	no
Brms1l	5.605458202	11.79696676	8.393894539	9.7360743	0.765560792	2.83E-17	-0.380042583	5.59E-05	no	no	no	no
Brox	28.9441304	24.86394726	31.95593926	25.4070082	-0.498479013	1.67E-15	0.445420051	8.94E-17	no	no	no	no
Brpf1	13.47921902	18.05935904	13.60297763	18.12466277	0.119756695	0.066971589	-0.30628145	0.000300953	no	no	no	no
Brpf3	9.444288551	14.07447175	14.40617443	15.29461519	0.247421858	0.010605185	0.177909087	0.112647306	no	no	no	no
Brwd1	17.04898562	18.32111691	19.27430179	17.46218409	-0.183574329	0.00062722	0.164984364	0.001808955	no	no	no	no
Brwd3	8.064622919	12.47257564	16.56015794	10.48194265	0.375689847	0.000404288	0.454652265	0.00053613	no	no	no	no
Bscl2	23.03441092	10.57247466	10.20019878	12.73999936	-1.430296247	2.67E-112	0.063613149	0.600309936	no	no	yes	no
Bsdc1	45.10898322	22.8958911	43.48915243	22.67041593	-1.279877034	3.35E-65	1.025559031	5.91E-35	no	no	no	yes
Bsg	109.4924594	89.82457354	110.2086818	97.82330872	-0.154186719	0.456433433	-0.051755295	0.863761439	no	no	no	no
Bsn	0.115160937	8.584879786	2.654044777	6.673522429	5.844049256	6.99E-220	-1.494001474	1.49E-11	no	yes	no	no
Bspry	3.619089504	8.091956514	8.447867704	12.69201498	0.7844989	3.80E-08	0.237097754	0.180843058	no	no	no	no
Bst2	67.20120504	60.44608796	46.80952735	72.54040842	-0.265937441	0.041532771	-0.471145884	0.004209154	no	no	no	no
Btaf1	14.58396791	29.15149166	18.65226309	27.02682772	0.77080735	1.49E-26	-0.607163403	2.92E-13	no	no	no	no
Btbd1	34.05892871	34.88724591	28.73609391	34.54438136	-0.202819556	0.004669796	-0.236707246	0.039026501	no	no	no	no
Btbd10	4.276714747	5.526879274	6.021512808	5.777039892	0.010993845	0.918804203	0.271666041	0.030775209	no	no	no	no
Btbd2	14.4545322	11.87196254	11.10603069	8.342657894	-0.580126786	3.02E-12	-0.002656341	0.987128302	no	no	no	no
Btbd3	7.010050163	18.2938761	12.83430379	13.25500448	1.070570959	1.88E-39	-0.394414726	0.000431741	yes	no	no	no
Btbd6	17.00424494	12.40716415	10.01479295	10.67558989	-0.771804739	4.17E-15	-0.182788933	0.209979995	no	no	no	no
Btbd7	9.202820556	10.95891399	14.18767221	10.65133907	-0.061942736	0.495128025	0.492871058	4.12E-10	no	no	no	no
Btbd9	9.730937355	10.18321791	8.917053352	9.208340248	-0.243971566	0.001147102	-0.073727841	0.437308368	no	no	no	no
Btd	65.58385601	25.38254956	49.01599445	31.01127443	-1.689542968	1.83E-68	1.057840164	8.80E-19	no	no	no	yes
Btf3	65.08590933	78.29538947	77.2208005	83.16829851	0.537033992	0.026010293	-0.48895392	0.108407241	no	no	no	no
Btf3l4	20.42643651	23.86972321	21.41537385	22.43674434	0.007751563	0.936319605	-0.136311351	0.051057183	no	no	no	no
Btg1	18.48443026	17.39515831	28.73348407	17.31698945	-0.361910291	1.77E-06	0.796639231	2.46E-21	no	no	no	no
Btg2	9.503082576	17.94984865	49.53957623	18.31589031	0.606552787	0.000888722	1.535665351	1.14E-15	no	no	no	yes
Btg3	3.253033406	20.05820179	20.54146002	19.48673058	2.365974088	1.04E-95	0.130885253	0.188110665	yes	no	no	no
Btnl10	0.245253769	5.701353161	4.855860238	2.51946461	3.996154657	2.74E-18	-0.031299007	0.963507967	yes	no	no	no
Btnl9	4.279919908	2.493376958	2.481711094	2.909611728	-1.064172998	2.11E-11	0.119916644	0.619490147	no	no	yes	no
Btrc	3.637464409	5.057647128	5.966455399	5.45002509	0.153863559	0.063819002	0.373660929	0.000514107	no	no	no	no
Bub1	0.19813142	29.11649834	8.019418656	30.60824016	6.903117696	3.74E-253	-1.82192503	9.98E-35	no	yes	no	no
Bub1b	0.570807766	51.10401744	10.07841412	45.16661353	6.364756433	2.14E-245	-2.378624284	2.45E-58	no	yes	no	no
Bub3	24.69934828	43.90204626	27.06379732	40.12478425	0.668606035	4.92E-12	-0.733065214	8.96E-10	no	no	no	no
Bud13	5.771382124	9.729253822	6.704510845	9.066950675	0.424143274	6.95E-07	-0.401509071	5.75E-06	no	no	no	no
Bud31	30.08958853	32.78815342	33.3800307	34.31019459	-0.06690388	0.671755237	0.004675076	0.984391985	no	no	no	no
Bysl	10.80873596	21.909374	8.255058488	23.73202508	0.729252687	2.44E-17	-1.299386961	1.37E-30	no	yes	no	no
Bzw1	79.1304015	91.75596997	92.01909949	99.81942445	0.251455981	0.114386405	-0.233196355	0.254860362	no	no	no	no
Bzw2	6.640353105	49.59595082	14.56054736	44.54486759	2.892480046	3.06E-87	-1.923945451	8.31E-32	no	yes	no	no
C030006K11Rik	27.21340928	27.90432261	9.392793007	24.50969842	-0.271852896	0.001678359	-1.450667001	7.42E-38	no	yes	no	no
C130050O18Rik	0.878984599	4.359273943	1.19658848	4.111483347	1.918599337	5.63E-18	-1.628709582	3.31E-10	no	yes	no	no
C130074G19Rik	100.849294	73.54740908	93.59403109	75.72390618	-0.619303042	9.48E-13	0.292418134	0.035309138	no	no	no	no
C1d	18.17463833	16.86132942	16.84971919	16.80146857	-0.317274522	0.001542302	0.002543616	0.986394555	no	no	no	no
C1galt1	44.32494461	31.44985927	53.64708076	34.23005991	-0.753812568	1.74E-16	0.830937563	9.29E-37	no	no	no	no
C1galt1c1	34.96125731	25.50367124	26.37749875	26.97420769	-0.728480698	7.01E-21	0.114272283	0.225457056	no	no	no	no
C1qa	47.27686299	68.82695824	83.21428545	65.38822147	0.450533954	0.001515601	0.165696002	0.366564859	no	no	no	no
C1qb	43.08318256	73.60063152	82.41546624	73.29469525	0.69089281	1.54E-06	0.053064199	0.798254102	no	no	no	no
C1qbp	47.2690558	85.09301731	31.73319001	91.81499237	0.908547138	3.35E-08	-1.654720429	6.50E-16	no	yes	no	no
C1qc	45.58315897	81.87204668	89.0963521	74.15615676	0.78778607	8.72E-08	-0.009742647	0.964015418	no	no	no	no
C1ql3	4.370430814	2.565829379	4.494158786	2.467420281	-1.112574127	5.42E-10	0.94322584	1.73E-06	no	no	yes	no
C1qtnf1	15.92945123	3.244899168	4.010191473	2.099410664	-2.641211836	9.68E-37	0.447967108	0.168976366	no	no	yes	no
C1qtnf6	1.466110331	3.416968604	4.300570193	3.64026163	0.832301641	3.76E-07	0.52202278	0.021779795	no	no	no	no
C1ra	50.91048293	28.04131045	31.35868953	32.296282	-1.068623197	1.21E-56	0.158743235	0.066921938	no	no	yes	no
C1rb	9.763668225	5.415994004	5.479835124	6.279717387	-1.069616879	5.23E-29	0.002991121	0.985837566	no	no	yes	no
C1rl	87.5966406	23.78834191	44.76338774	23.48577265	-2.195836254	7.68E-245	1.01547542	5.72E-31	no	no	no	yes
C2	78.84176871	17.35802747	74.75189055	30.15943617	-2.516084095	2.26E-80	2.210726729	6.11E-45	no	no	no	yes
C230052I12Rik	2.558084511	34.89701191	5.012715858	32.42957364	3.504310876	2.92E-249	-2.696259071	1.78E-150	no	yes	no	no
C2cd2	61.47140739	7.89159341	14.606697	8.204419368	-3.320345515	4.45E-283	1.042012895	1.37E-12	no	no	no	yes
C2cd2l	22.28531412	3.959399307	17.53165392	4.90721329	-2.857380492	1.48E-130	2.285002641	6.85E-49	no	no	no	yes
C2cd3	6.636658464	14.21178844	9.163963159	12.69281853	0.801975569	1.80E-37	-0.526698706	4.03E-10	no	no	no	no
C2cd5	3.698569575	10.3162544	7.801238218	9.090936029	1.176154456	5.15E-51	-0.314162445	5.45E-06	yes	no	no	no
C3	187.1129518	110.0604485	188.7419183	141.6534404	-0.573232686	0.012611924	0.360815003	0.222841875	no	no	no	no
C330007P06Rik	34.45693564	20.24017217	21.83993128	22.55271948	-1.048791421	1.51E-47	0.184470115	0.023625032	no	no	yes	no
C330018D20Rik	13.67515869	8.958711092	10.61804298	8.814067208	-0.947283678	7.13E-21	0.375343084	0.002485154	no	no	no	no
C330021F23Rik	2.935749436	5.138489739	8.531238455	7.182288244	0.549963478	0.000262592	0.804324665	1.91E-06	no	no	no	no
C330027C09Rik	1.059091417	26.89864176	8.083474952	27.29305672	4.371778575	1.13E-217	-1.659382918	2.43E-58	no	yes	no	no
C3ar1	2.530780302	6.078500272	8.977541313	9.071565109	0.890310943	2.67E-05	0.719306066	0.005628553	no	no	no	no
C4a	19.50852906	2.316010621	5.251560042	4.149969585	-3.386581476	3.10E-51	1.306576017	3.79E-17	no	no	no	yes
C4b	110.4253518	38.22415907	80.67277885	54.10110546	-1.759664971	2.12E-63	1.075838069	1.50E-17	no	no	no	yes
C4bp	129.1602959	6.543352712	27.32753807	14.28776173	-4.493829946	1.46E-17	1.78809811	0.002016202	no	no	no	yes
C530008M17Rik	0.251401399	6.050254402	1.850863879	3.487946051	4.229103091	1.63E-89	-1.451702999	1.44E-05	no	yes	no	no
C5ar1	2.514985602	4.391002867	5.580310461	5.147165358	0.380748136	0.052747414	0.560253579	0.030775007	no	no	no	no
C5ar2	3.795432708	1.124577096	1.972742442	1.262970948	-2.065877161	7.76E-19	0.891282598	0.00441021	no	no	yes	no
C6	48.94745861	1.780145212	2.481327466	3.432851382	-5.171787011	1.08E-28	0.7025293	0.156668646	no	no	yes	no
C77080	32.61135155	8.498616589	24.4798032	13.38541556	-2.322850662	2.39E-46	1.67157258	1.10E-19	no	no	no	yes
C78339	28.85551981	20.66129526	24.45979156	24.93141065	-0.741494047	6.00E-29	0.294962113	0.004475503	no	no	no	no
C87436	11.680059	19.37977149	9.604688198	16.52964768	0.464121462	4.56E-06	-0.925934613	1.06E-27	no	no	no	no
C8a	134.7336131	21.57007723	61.05569205	36.44766968	-2.962820442	2.53E-90	1.590875797	1.04E-17	no	no	no	yes
C8b	92.45484805	21.98286305	47.5039506	28.41753673	-2.343978197	2.17E-57	1.179060392	1.28E-10	no	no	no	yes
C8g	158.7108774	14.08107685	42.77402042	29.78105956	-3.834985286	4.60E-53	1.655495693	1.04E-07	no	no	no	yes
C9	121.5599982	2.841480521	36.9410048	16.29492067	-5.584359699	4.03E-45	3.350463421	1.28E-13	no	no	no	yes
Caap1	5.159363947	6.499958053	6.428240668	6.887738308	0.025296137	0.857818272	0.091609736	0.527678682	no	no	no	no
Cab39	48.73153229	39.63983989	57.94810668	47.69977952	-0.560843699	2.91E-23	0.604899493	1.13E-11	no	no	no	no
Cab39l	25.01574794	14.14622981	15.81526513	14.36765588	-1.110049944	1.95E-90	0.246965487	0.003937777	no	no	yes	no
Cabin1	9.327522142	22.24468999	12.58410755	18.7978107	0.990682175	1.18E-34	-0.73942493	4.15E-16	no	no	no	no
Cables1	4.444049414	6.028957426	4.605820311	6.659181109	0.117009842	0.571296433	-0.241611798	0.243010917	no	no	no	no
Cables2	30.88432554	17.9088111	13.89815775	17.19907295	-1.123006229	1.96E-37	-0.225602738	0.088558923	no	no	yes	no
Cabyr	11.22000709	3.141275203	5.008677108	3.071388862	-2.167391655	5.99E-55	0.805587235	7.65E-07	no	no	yes	no
Cacfd1	30.12330617	16.7066577	32.94953343	16.77442665	-1.161613732	5.56E-41	1.085515465	2.02E-21	no	no	no	yes
Cactin	13.56218973	22.64444294	13.32072138	22.10747307	0.409762084	2.77E-06	-0.640188092	3.55E-13	no	no	no	no
Cacul1	35.66982983	34.97043752	50.07978267	38.28238462	-0.293006732	2.67E-06	0.584416804	1.43E-33	no	no	no	no
Cacybp	43.15314354	92.93667678	48.85838884	101.8735469	1.175354556	1.13E-12	-1.174978958	2.03E-09	no	yes	no	no
Cad	18.16060841	69.37634077	20.34639407	70.08639698	1.766285241	2.44E-52	-1.794037905	5.42E-51	no	yes	no	no
Cadm1	12.13164006	22.85305557	18.61370027	21.53511943	0.651196938	1.01E-16	-0.229008802	0.056037777	no	no	no	no
Cadm4	6.939606778	1.343715547	4.908187115	1.630110685	-2.724546538	5.02E-32	1.974751117	2.01E-09	no	no	no	yes
Cadps2	7.408372126	0.039336339	0.042867553	0.186481002	-7.429181111	2.80E-64	0.003461888	0.996029636	no	no	yes	no
Cage1	3.755356962	2.669248787	3.656596333	2.462897717	-0.795698753	1.42E-15	0.538885182	2.79E-05	no	no	no	no
Calcoco1	17.50429754	7.731071512	16.29190571	6.412365314	-1.515724993	3.47E-42	1.206500089	7.33E-35	no	no	no	yes
Calcrl	16.82018652	8.395701185	10.12365715	6.627856519	-1.293257438	1.90E-37	0.361455833	0.013881692	no	no	yes	no
Cald1	76.12833706	55.54648516	80.74482912	60.03582317	-0.61941044	9.30E-17	0.500935224	2.07E-07	no	no	no	no
Calhm2	1.783463931	3.194483004	2.051439085	2.661416762	0.48809382	0.000575142	-0.476777602	0.006798534	no	no	no	no
Calm1	67.17453556	57.02671625	63.37819832	60.30069552	-0.240586096	0.097692212	-0.056342507	0.793097752	no	no	no	no
Calm2	82.69573585	95.87458926	114.2304537	102.5946388	0.335183628	0.076452813	-0.076020744	0.788134759	no	no	no	no
Calm3	53.44548333	89.84031875	83.44294282	85.7916861	0.708027258	9.07E-07	-0.27289745	0.136137838	no	no	no	no
Calml4	3.401342952	31.1450181	52.5437362	29.70705194	2.966753274	4.27E-175	0.776014565	2.42E-15	yes	no	no	no
Caln1	5.849536514	0.050826722	0.361114814	0.074785639	-7.363336614	5.05E-76	2.385858174	0.000354897	no	no	no	yes
Calr	169.4347974	112.9889054	168.9200083	131.3370357	-0.488760421	0.008052482	0.262481282	0.286752676	no	no	no	no
Calu	74.55743375	76.53976384	110.3082719	83.07869224	-0.08573776	0.346182181	0.443542263	6.83E-05	no	no	no	no
Camk1	12.89333582	9.522412051	10.76325325	11.35725068	-0.713466088	1.23E-13	0.262942637	0.041125097	no	no	no	no
Camk1d	12.42785713	13.89978779	9.845915245	8.981296284	-0.150195756	0.277192679	-0.369663214	0.109411676	no	no	no	no
Camk2d	3.897441197	4.474953071	4.026944152	3.046741904	-0.148326967	0.168937098	0.010765106	0.956498573	no	no	no	no
Camk2g	10.85642327	17.02841604	9.840270956	13.53263837	0.315542944	4.67E-05	-0.651814615	7.76E-21	no	no	no	no
Camk2n1	24.96864252	7.4209484	18.4231811	10.3728375	-2.069499989	3.54E-136	1.435498325	7.94E-36	no	no	no	yes
Camk4	2.486600491	3.326515303	3.27052594	3.322059508	0.070903976	0.733043518	0.1198878	0.603257572	no	no	no	no
Camkk2	6.96988101	6.482997388	6.358634805	6.591010765	-0.441281285	0.000306294	0.110726581	0.520749761	no	no	no	no
Camkmt	2.55424345	3.318504269	3.332364241	3.329319003	0.038088108	0.783626658	0.140627542	0.311667175	no	no	no	no
Camkv	0.040549659	14.9447371	0.418280633	3.862802008	7.975012389	3.75E-78	-4.761155489	1.37E-52	no	yes	no	no
Caml	28.63931488	25.91546605	31.40148308	28.46073213	-0.462818692	3.22E-14	0.381054938	5.22E-07	no	no	no	no
Camp	0.221938187	14.15579395	21.88774817	20.33096593	6.03638108	4.74E-17	0.426930685	0.486572664	yes	no	no	no
Camsap1	9.532488796	19.53157024	11.28196023	17.45923001	0.727834671	7.01E-36	-0.673368988	9.61E-22	no	no	no	no
Camsap2	18.23457206	19.77601389	19.57796073	17.63424325	-0.187150123	0.002679084	0.090771016	0.176336557	no	no	no	no
Camsap3	9.174114096	23.41654039	18.84569468	23.71397158	1.03576691	2.78E-38	-0.196651251	0.126616809	yes	no	no	no
Camta2	9.832133524	7.250498637	8.642370897	6.940132265	-0.814493682	4.66E-09	0.414707806	0.014902393	no	no	no	no
Cand1	30.0623978	41.32445937	32.54436913	40.87365141	0.284266469	8.40E-05	-0.362453293	1.53E-06	no	no	no	no
Cand2	0.960946545	4.071085787	4.460202999	8.860773609	1.672004933	5.48E-28	0.360856411	0.043152482	yes	no	no	no
Cant1	19.34818207	16.1231487	17.33532734	15.90023595	-0.598485444	1.27E-15	0.239384738	0.003078828	no	no	no	no
Canx	99.93898769	91.63478879	103.3085016	101.702709	0.030027584	0.894336804	-0.177443122	0.523689926	no	no	no	no
Cap1	29.29997662	31.33253722	39.51109735	31.18268704	-0.134011776	0.002733816	0.349157758	2.43E-08	no	no	no	no
Capg	2.302546788	11.29002262	16.95858336	16.11709268	2.024840032	6.88E-18	0.692405284	0.008582208	yes	no	no	no
Capn1	9.513650827	5.449157781	10.21796588	8.217065916	-1.140508716	6.19E-15	1.058050191	3.60E-09	no	no	no	yes
Capn10	16.53210491	34.01296017	36.77818675	34.70528374	0.803630485	3.72E-12	0.164923029	0.129755604	no	no	no	no
Capn15	12.88648684	16.52116415	9.534898278	15.07795566	0.008068142	0.951926744	-0.625371197	1.41E-07	no	no	no	no
Capn2	21.38055151	7.33101696	14.28192154	9.834577726	-1.85802295	2.30E-149	1.087955158	3.81E-10	no	no	no	yes
Capn5	2.384930957	12.92797808	11.78087153	15.84345449	2.146274396	1.20E-120	-0.031986387	0.774569096	yes	no	no	no
Capn7	26.67647533	30.38285015	28.87979468	28.92611769	-0.055650395	0.503415495	-0.03292621	0.754494729	no	no	no	no
Capns1	60.60408551	47.12597103	66.60566677	50.37300725	-0.580569026	1.60E-13	0.517935454	1.04E-08	no	no	no	no
Caprin1	53.77354825	64.85033646	67.46475098	68.6268921	0.307351553	0.044405403	-0.173449511	0.402459091	no	no	no	no
Caprin2	2.160628812	9.340217644	4.474378305	9.280751831	1.857370385	1.02E-52	-0.994974297	3.48E-11	yes	no	no	no
Capza1	39.01641787	59.26865547	64.13977689	62.09045189	0.444121642	1.26E-07	0.071193092	0.477684939	no	no	no	no
Capza2	25.5300557	30.69096594	36.00723277	35.36008931	0.09599145	0.235526823	0.197247504	0.021325178	no	no	no	no
Capzb	32.08254379	33.53431908	38.53880162	36.84136297	-0.158483299	0.004044548	0.21721754	0.02115494	no	no	no	no
Car1	12.58091567	17.4237719	14.7300965	9.670598832	0.315716483	0.411406262	-0.267939752	0.622137605	no	no	no	no
Car12	0.104218986	38.70957319	0.350151152	30.99928625	8.219648815	6.34E-243	-6.532553263	0	no	yes	no	no
Car13	0.604560536	3.32790659	3.172552432	2.768513768	2.213010623	1.81E-32	0.016040745	0.932391889	yes	no	no	no
Car14	40.53418699	33.4719715	28.5172092	29.87482024	-0.539833149	3.50E-12	-0.169927637	0.190698474	no	no	no	no
Car2	12.09204435	36.90505481	43.2382372	26.32956017	1.682559254	2.81E-06	-0.035550372	0.948794577	yes	no	no	no
Car3	129.998919	12.68940078	48.56232143	22.61177324	-3.625319773	1.32E-49	1.915067995	1.92E-09	no	no	no	yes
Car5a	45.87908052	1.915959961	14.26836037	3.172515613	-4.808904172	1.47E-76	2.812341909	1.09E-18	no	no	no	yes
Car5b	5.805651141	1.847156725	2.494769954	1.634229884	-1.940514064	1.37E-53	0.567512127	0.002132749	no	no	yes	no
Car7	1.55092184	9.763538052	36.96314974	18.46952301	2.3153622	2.81E-47	2.016130844	2.65E-24	yes	no	no	yes
Car8	30.24485335	12.39632634	14.41597781	11.97065399	-1.573064565	4.17E-76	0.303730821	0.042590088	no	no	yes	no
Card10	3.440165969	2.918333163	5.077702295	4.714255219	-0.582030587	0.001446712	0.972969514	4.33E-09	no	no	no	no
Card14	0.352137914	6.665343991	2.375424945	6.213738578	4.033282587	1.66E-101	-1.355680735	2.69E-20	no	yes	no	no
Card6	14.08846594	5.824442595	11.32435574	7.60601128	-1.618998574	1.77E-25	1.094035016	3.50E-07	no	no	no	yes
Card9	1.128235038	2.193077339	3.165692364	3.406370265	0.606761282	0.01006013	0.647143224	0.006154728	no	no	no	no
Carf	5.187030718	8.847501456	8.076943972	7.008827579	0.510421731	5.18E-08	-0.067173815	0.647735459	no	no	no	no
Carhsp1	73.25801055	36.12249228	61.89436291	43.37743583	-1.334844742	3.34E-106	0.879348518	2.59E-20	no	no	yes	no
Carkd	43.64998104	28.8665082	32.02369142	27.38105058	-0.829331759	1.65E-24	0.212563397	0.067776303	no	no	no	no
Carm1	11.4309156	31.11618222	12.38319143	27.56761561	1.205437324	4.39E-88	-1.279196753	3.88E-61	no	yes	no	no
Cars	25.2884562	31.05500328	20.74037368	23.75453245	0.074444072	0.571814782	-0.542355316	1.09E-05	no	no	no	no
Cars2	11.6683793	17.92511081	13.59747111	20.36091341	0.371167061	0.003646082	-0.32824205	0.053622773	no	no	no	no
Casc3	13.7044199	25.01228739	15.20420553	23.97198756	0.55728248	1.03E-09	-0.599615844	2.06E-07	no	no	no	no
Casc4	3.930710291	23.55760797	24.12129374	26.10340921	2.318526141	1.27E-280	0.106318222	0.435379161	yes	no	no	no
Casc5	0.592479061	41.23461382	12.40290455	38.19673267	5.85878971	6.83E-305	-1.705138015	6.87E-86	no	yes	no	no
Casd1	26.90046289	28.57192379	25.30364556	30.33102409	-0.172906487	0.066719922	-0.119616228	0.199667987	no	no	no	no
Cask	8.372411567	8.92710263	6.268774598	5.02863812	-0.212920549	0.04982767	-0.391300126	0.004607204	no	no	no	no
Caskin2	9.424555128	11.88478885	14.81769864	13.57106875	0.032379267	0.796323978	0.425062885	0.00024125	no	no	no	no
Casp1	3.660951917	6.949618851	7.060434088	6.413760892	0.579340977	0.000321385	0.130939447	0.551384206	no	no	no	no
Casp2	8.011724895	28.61437664	16.45783264	20.37071379	1.561923643	1.23E-66	-0.72242409	2.18E-12	yes	no	no	no
Casp3	14.85859225	14.25159366	17.29499987	13.29162757	-0.327561211	0.000736841	0.36418094	0.00594875	no	no	no	no
Casp4	2.419728551	2.321240337	3.317391127	2.55076094	-0.246213424	0.048497343	0.509837145	0.013309187	no	no	no	no
Casp6	22.96328918	10.43630349	24.67785234	13.64116501	-1.406000826	5.22E-52	1.308400448	2.64E-39	no	no	no	yes
Casp7	33.05952038	8.677767613	18.57832391	15.10812774	-2.240770108	4.82E-101	1.211249154	3.67E-14	no	no	no	yes
Casp8	23.07537698	14.00036265	15.9550824	14.7147606	-0.98065243	1.00E-44	0.262754445	0.017145171	no	no	no	no
Casp8ap2	9.871223558	24.18063518	16.33652672	23.24561961	0.996507668	6.81E-41	-0.472286005	2.21E-10	no	no	no	no
Casp9	11.70276908	5.671203807	7.621541065	5.802937628	-1.36300038	6.33E-67	0.548245737	9.21E-10	no	no	yes	no
Cast	13.87142824	9.42139587	15.47818509	10.22424774	-0.841671466	3.27E-18	0.817807077	1.75E-12	no	no	no	no
Cat	167.0049684	75.80205055	110.95925	85.71283886	-1.127960335	2.24E-11	0.315882554	0.143824392	no	no	yes	no
Catsper2	5.640753216	2.545488797	3.467008688	2.136053654	-1.49382999	4.45E-26	0.60997041	0.001912007	no	no	yes	no
Cav1	4.716603095	11.74844301	12.55701241	17.78694725	1.019297452	5.66E-08	0.206828684	0.330861169	yes	no	no	no
Cav2	5.154855527	4.767723917	5.893154806	6.161098895	-0.421256478	0.033369857	0.420691932	0.003950696	no	no	no	no
Cbfa2t2	9.771054268	15.6478147	12.92892482	14.87088678	0.375220567	1.68E-08	-0.155232012	0.106510729	no	no	no	no
Cbfb	18.89582106	27.8032595	29.41973103	33.63814405	0.305056601	0.001270637	0.140640698	0.224630836	no	no	no	no
Cbl	9.417480463	22.19190437	16.864755	21.41895931	0.945803272	7.31E-35	-0.294599419	0.001155477	no	no	no	no
Cblb	5.381468963	7.408289742	10.0925326	7.267441234	0.124057723	0.227818739	0.585769884	5.52E-08	no	no	no	no
Cblc	19.13227254	4.272615444	9.196088019	6.401565439	-2.482209818	1.87E-38	1.225827467	0.000339427	no	no	no	yes
Cbll1	7.075101648	13.10518174	8.856667315	12.36117826	0.558172962	2.15E-06	-0.422162016	0.000126155	no	no	no	no
Cbr1	88.45291076	22.90063103	37.57719457	25.60257542	-2.229523771	2.84E-88	0.776979541	0.001584163	no	no	yes	no
Cbr2	0.166543319	1.417050311	4.548237082	1.122285591	2.639431665	4.10E-06	1.538512318	0.003814698	yes	no	no	yes
Cbr4	19.60489837	11.19474525	12.71799314	10.63186022	-1.072122272	2.10E-31	0.259990127	0.052793051	no	no	yes	no
Cbs	124.3143443	55.88999911	70.32144532	59.68692922	-1.337523012	1.68E-42	0.310282618	0.010342952	no	no	yes	no
Cbwd1	5.924979458	12.88007906	8.116685429	12.70521308	0.843367385	2.57E-11	-0.589595257	1.59E-05	no	no	no	no
Cbx1	18.10660586	30.41018021	22.48951235	29.67714963	0.527912419	7.93E-26	-0.425785471	2.09E-11	no	no	no	no
Cbx2	8.400810996	11.62988409	6.355354748	9.677213796	0.127498595	0.242420133	-0.727038111	1.88E-05	no	no	no	no
Cbx3	44.21544581	75.45228871	63.53991012	79.46907064	0.808626794	1.01E-06	-0.490123965	0.008707257	no	no	no	no
Cbx4	9.208117933	4.030854473	4.314988115	3.144788882	-1.489609424	4.08E-37	0.201084374	0.328997046	no	no	yes	no
Cbx5	20.98445382	66.35220012	42.23879778	66.26141918	1.552788778	3.77E-50	-0.739303194	3.58E-09	yes	no	no	no
Cbx6	4.652843566	13.51597845	7.133226551	10.07671247	1.191676798	8.18E-20	-0.788960141	5.71E-08	yes	no	no	no
Cbx7	3.442288973	7.649017589	2.32999085	5.899794583	0.802991456	2.45E-09	-1.528578821	1.34E-16	no	yes	no	no
Cbx8	12.00006624	7.601401476	8.640178108	5.905929255	-1.003133187	5.63E-18	0.334978359	0.01256846	no	no	yes	no
Cby1	10.43119271	10.46867646	8.34584641	9.713562695	-0.293554156	0.023156379	-0.178897542	0.298222888	no	no	no	no
Cc2d1a	8.657388402	9.492682595	9.65869438	11.20687197	-0.217100486	0.03061131	0.20254493	0.087621645	no	no	no	no
Cc2d1b	15.06869426	38.91884803	27.82068377	35.15216844	1.099647991	2.72E-39	-0.413152591	1.10E-06	yes	no	no	no
Cc2d2a	2.869156593	8.52658577	5.166928339	7.67963986	1.341495575	6.11E-23	-0.680211737	0.000543891	yes	no	no	no
Ccar1	18.31218404	37.22060168	31.46584348	36.64207588	0.847933949	1.49E-21	-0.25689828	0.030099838	no	no	no	no
Ccar2	23.54989297	32.27964072	26.11342677	30.21026831	0.164355456	0.011342524	-0.220138422	0.000735242	no	no	no	no
Ccbe1	3.604366977	1.545279269	0.72087183	0.812802122	-1.507209162	1.07E-10	-0.939629413	0.005859106	no	no	yes	no
Ccbl1	90.82810534	49.58264671	48.56287473	49.45357129	-1.091256606	6.77E-41	-0.021599127	0.887514658	no	no	yes	no
Ccbl2	58.18714624	55.0590593	48.03115374	48.35213243	-0.166570985	0.346455892	-0.304918003	0.135341555	no	no	no	no
Ccdc101	31.77946982	37.62477379	20.78189667	32.28417305	-0.040838153	0.552591766	-0.754734198	2.28E-20	no	no	no	no
Ccdc102a	0.809406396	1.84742622	3.391537498	3.85644386	0.925787956	0.000241431	0.996020476	0.00191588	no	no	no	no
Ccdc107	76.3071055	45.12543092	31.53309868	39.55255919	-1.044590867	2.54E-49	-0.440041799	2.81E-06	no	no	yes	no
Ccdc115	21.36705084	35.75731986	23.5161902	31.35969373	0.496408	4.42E-09	-0.563352341	2.27E-11	no	no	no	no
Ccdc116	0.08260367	8.540140135	0.335730236	6.901672787	6.296479476	2.19E-94	-4.339971755	1.36E-93	no	yes	no	no
Ccdc117	33.25936976	34.1083196	32.01954796	36.76552698	-0.235440408	0.002506186	-0.022749936	0.786676404	no	no	no	no
Ccdc12	29.80544366	42.59033151	31.88907389	38.31992027	0.326095973	0.006311887	-0.385344662	0.002082863	no	no	no	no
Ccdc120	1.288421633	2.064333533	14.00945529	3.34697947	0.270665213	0.297983041	2.838657351	2.53E-24	no	no	no	yes
Ccdc122	6.063648057	8.278469087	13.67040327	6.304150634	0.140849087	0.267823102	0.816010298	2.07E-08	no	no	no	no
Ccdc124	36.11438867	37.78269226	20.8721845	36.91960108	-0.214461621	0.093991834	-0.765598158	2.55E-08	no	no	no	no
Ccdc125	7.811238947	6.553468549	9.746348216	6.161516187	-0.539573725	7.92E-09	0.67210591	6.04E-11	no	no	no	no
Ccdc126	6.299997665	5.050898627	6.448285151	4.882166816	-0.6336097	4.34E-09	0.490562076	0.000115326	no	no	no	no
Ccdc127	9.132716161	11.62230349	11.26790964	11.65175138	0.06007053	0.430980708	0.047717665	0.52489172	no	no	no	no
Ccdc130	6.060506537	5.738398467	6.283642759	5.191672659	-0.40332198	0.000388611	0.271384835	0.031243127	no	no	no	no
Ccdc132	6.445956049	11.24309301	8.011272649	10.01856683	0.551733479	5.99E-12	-0.428117761	1.27E-07	no	no	no	no
Ccdc134	6.422392773	13.13570704	9.725486902	11.89668419	0.706904559	1.58E-06	-0.308236527	0.014871778	no	no	no	no
Ccdc137	12.10527661	46.96196473	11.92537959	34.36652366	1.701417937	1.90E-168	-1.914718141	1.93E-136	no	yes	no	no
Ccdc138	5.501957262	4.333236461	5.058414103	4.079681863	-0.589774657	1.40E-09	0.239809815	0.063929988	no	no	no	no
Ccdc14	0.950720935	7.96747419	2.423099648	5.386767301	2.716543874	1.01E-111	-1.540718227	1.88E-29	no	yes	no	no
Ccdc141	11.27162189	1.566148764	7.662032784	4.123629411	-3.165125598	2.64E-50	2.325451498	3.79E-13	no	no	no	yes
Ccdc142	17.39900433	17.8111988	15.72369596	17.47070275	-0.237550732	0.00060045	-0.112884095	0.163353039	no	no	no	no
Ccdc148	0.699614445	3.851720583	5.696575681	3.727459522	2.15878501	1.18E-54	0.6654085	0.005649292	yes	no	no	no
Ccdc15	1.903063775	8.024325773	3.432430254	7.645465988	1.761422623	3.03E-60	-1.080729689	5.02E-17	no	yes	no	no
Ccdc151	4.016523314	0.106499212	0.208609567	0.159652757	-5.331119936	4.38E-80	0.861458491	0.116988165	no	no	yes	no
Ccdc152	30.98436311	9.463449343	19.62905839	8.523749054	-2.012342466	3.62E-33	1.150999773	1.55E-13	no	no	no	yes
Ccdc157	11.84601818	1.819548477	3.910235534	1.913834378	-2.985764585	5.91E-144	1.183256692	3.83E-12	no	no	no	yes
Ccdc159	6.649349575	1.965399327	5.352023285	2.262746578	-1.98763927	6.33E-36	1.463733792	1.34E-13	no	no	no	yes
Ccdc162	7.517127044	1.485427838	2.055128806	1.187151582	-2.654944448	1.66E-58	0.554688754	0.004850197	no	no	yes	no
Ccdc163	8.988864565	13.17089499	10.89137246	14.35324893	0.230706093	0.057926129	-0.148881488	0.369559885	no	no	no	no
Ccdc166	5.074664808	7.107024219	4.516122599	8.728556759	0.121366553	0.506124407	-0.484963175	0.003798855	no	no	no	no
Ccdc167	11.42436884	10.01132565	11.83327181	9.926426463	-0.496737967	1.35E-09	0.352564458	0.000287646	no	no	no	no
Ccdc17	5.997426088	2.642489354	4.958622835	2.56470161	-1.46217883	1.50E-37	0.974500229	4.93E-12	no	no	yes	no
Ccdc171	3.212955194	3.080233753	2.179877731	2.753171825	-0.398218208	0.001023337	-0.372293699	0.012696485	no	no	no	no
Ccdc174	5.156811825	6.332760797	5.32101471	6.057535757	0.01583775	0.85514925	-0.14701155	0.09937491	no	no	no	no
Ccdc176	1.761074588	6.257764666	2.79617571	5.21843732	1.496395199	2.90E-33	-0.995147305	7.21E-12	yes	no	no	no
Ccdc18	0.426442685	12.18037265	3.376333034	9.474656907	4.532453123	1.93E-148	-1.774816269	1.68E-31	no	yes	no	no
Ccdc181	5.833953867	10.44488653	8.945009396	8.957026846	0.567289567	7.83E-06	-0.145069535	0.442631407	no	no	no	no
Ccdc22	11.15718977	16.98413556	9.42834126	13.38294569	0.329441428	0.008625971	-0.760165749	2.34E-08	no	no	no	no
Ccdc23	11.22034275	12.63426841	16.52148466	10.61248949	-0.139260667	0.252861419	0.501169986	4.04E-05	no	no	no	no
Ccdc25	50.62905143	29.74746599	32.56638617	33.42079817	-1.036125338	2.84E-58	0.188432349	0.009489365	no	no	yes	no
Ccdc28a	14.27832601	12.62592073	11.18185218	10.70254656	-0.452708114	3.58E-05	-0.079120437	0.591278524	no	no	no	no
Ccdc28b	8.332073432	4.501491372	8.041510344	4.235801515	-1.141948202	3.61E-34	0.862160015	1.45E-23	no	no	yes	no
Ccdc3	1.616534685	2.436502264	3.039096842	3.889506759	0.152927513	0.597583647	0.535120906	0.100766485	no	no	no	no
Ccdc32	7.683448062	8.632841092	11.0814473	7.724304574	-0.164924739	0.108199703	0.471897966	5.51E-06	no	no	no	no
Ccdc34	1.631452764	19.06571451	8.828527297	15.67211611	3.278467033	4.97E-142	-1.020651189	2.05E-16	no	yes	no	no
Ccdc43	15.14935419	27.8277569	19.34221425	27.03779267	0.602096328	2.25E-18	-0.443841091	1.54E-11	no	no	no	no
Ccdc47	44.38613566	41.75418363	34.42866214	40.99784361	-0.312774519	4.77E-09	-0.260700797	0.002450435	no	no	no	no
Ccdc50	33.40591048	51.97011157	50.64443682	49.52255017	0.45298651	2.97E-08	-0.047461393	0.618321195	no	no	no	no
Ccdc51	11.28847169	15.16993569	10.8047402	13.47233658	0.166197044	0.147737182	-0.41031942	0.000485144	no	no	no	no
Ccdc53	20.53236587	29.15152238	22.70510886	25.78421493	0.365152265	0.003147076	-0.418399567	0.005280531	no	no	no	no
Ccdc55	6.889744967	9.852018914	7.913815231	8.225008493	0.21934027	0.002202973	-0.229357259	0.067654571	no	no	no	no
Ccdc57	3.04563144	8.834524327	1.750644738	7.262455536	1.257187389	2.04E-21	-2.182607093	3.78E-60	no	yes	no	no
Ccdc58	26.96006758	29.14760561	22.14847091	29.26038661	-0.002320547	0.984808285	-0.483952653	0.000253305	no	no	no	no
Ccdc59	16.49096091	31.12954089	20.22791296	29.6745815	0.647235368	2.70E-12	-0.558712072	2.27E-06	no	no	no	no
Ccdc6	20.37765747	31.7581515	23.23311883	28.99466453	0.359444161	5.33E-10	-0.356474957	0.001023615	no	no	no	no
Ccdc61	4.621331093	10.36374416	6.270481148	7.935851317	0.833172171	1.27E-10	-0.574656544	0.001295175	no	no	no	no
Ccdc66	7.813527506	12.17214363	9.661871629	11.86114836	0.369944647	0.00207731	-0.261073957	0.013722148	no	no	no	no
Ccdc68	17.8956786	10.54474655	16.69076094	16.37113914	-1.0264344	2.26E-09	0.739105918	0.000122169	no	no	yes	no
Ccdc71	19.96625003	23.37448021	26.85164566	24.293587	-0.079833887	0.287937525	0.302766783	0.000438009	no	no	no	no
Ccdc71l	5.069519248	6.465487956	7.627227533	5.507333279	-0.033824324	0.838170129	0.425682044	0.034831494	no	no	no	no
Ccdc73	2.189435116	3.811590417	2.116518181	2.602493381	0.461483719	0.001180181	-0.692791354	5.31E-06	no	no	no	no
Ccdc74a	1.757658601	3.739115819	3.253203334	2.575747788	0.740796697	0.000117275	-0.041370373	0.865246991	no	no	no	no
Ccdc77	3.465278313	14.24882812	8.275372748	13.26163877	1.746757936	2.59E-104	-0.698657087	6.73E-20	yes	no	no	no
Ccdc8	3.038743454	7.716426846	14.62241979	5.048177158	1.009407472	0.00068059	0.928564521	0.017942884	yes	no	no	no
Ccdc80	17.66516655	11.60281231	15.61418481	10.07796557	-0.935540941	2.13E-08	0.540659472	0.034217782	no	no	no	no
Ccdc82	11.43178266	8.223852974	10.0976903	7.264280503	-0.727612213	1.62E-12	0.335579794	0.018043042	no	no	no	no
Ccdc84	12.06369881	13.42797321	10.18324288	13.92117799	-0.149104292	0.098133273	-0.286050249	0.008820426	no	no	no	no
Ccdc85b	4.986740243	6.522700458	1.965853133	4.741681663	0.039881474	0.797574506	-1.586346057	9.94E-25	no	yes	no	no
Ccdc85c	7.825650897	16.4840386	7.975256788	16.58450754	0.772916592	1.36E-09	-0.924375602	0.000195887	no	no	no	no
Ccdc86	5.448033877	15.11168718	4.113309123	16.51623214	1.160023217	3.89E-35	-1.721558083	3.46E-37	no	yes	no	no
Ccdc88a	1.59198345	6.930669644	6.103321358	4.309487276	1.775513283	8.62E-62	-0.047167294	0.784518248	yes	no	no	no
Ccdc88b	1.671055622	2.552381161	3.20860414	2.631322737	0.261654102	0.183495195	0.474885805	0.019451871	no	no	no	no
Ccdc88c	1.369293729	13.73585733	6.843148424	16.0630812	3.012767136	4.65E-147	-0.865546035	7.39E-11	yes	no	no	no
Ccdc9	10.91547539	19.89886944	10.18575505	15.89200437	0.584713925	4.85E-11	-0.885210838	4.22E-32	no	no	no	no
Ccdc90b	7.795353336	15.93023893	14.83238927	15.16483758	0.831354225	3.39E-09	-0.110780615	0.575477183	no	no	no	no
Ccdc91	23.79462073	19.79857888	17.25145636	19.37625943	-0.53019626	2.34E-07	-0.115939261	0.427319162	no	no	no	no
Ccdc93	11.59076801	24.49047903	14.91677615	20.30142211	0.7968554	1.35E-47	-0.618692977	4.03E-17	no	no	no	no
Ccdc94	7.710649126	15.00117747	9.027810262	12.55669017	0.707857642	5.17E-10	-0.621750444	3.43E-06	no	no	no	no
Ccdc97	12.61885615	12.62225385	13.57247043	12.42244984	-0.325653679	0.000901483	0.221207578	0.057559334	no	no	no	no
Cchcr1	2.402940861	4.625944248	5.424137882	4.721988488	0.639107167	0.000944665	0.352379034	0.023798433	no	no	no	no
Ccl12	0.127173806	1.90279758	3.910772431	1.644924275	3.332275874	6.95E-07	1.191579708	0.008249911	yes	no	no	yes
Ccl2	0.799851206	6.999395577	26.87853519	7.652887779	2.735135045	2.79E-18	1.987548487	5.11E-11	yes	no	no	yes
Ccl24	5.067154199	1.685268354	1.442361938	0.681352012	-1.766115431	6.07E-09	-0.190190884	0.722726997	no	no	yes	no
Ccl25	4.35452895	6.286406579	4.997403368	5.815551646	0.25533236	0.019964551	-0.211678351	0.133235052	no	no	no	no
Ccl27a	4.915178248	2.041430913	5.058164877	1.763280785	-1.619705293	7.97E-28	1.500812974	2.25E-14	no	no	no	yes
Ccl4	0.173735672	3.963610279	2.387914869	2.49834184	4.391239967	1.07E-14	-0.648382244	0.050998712	yes	no	no	no
Ccl5	1.967275268	5.534213213	4.054325447	3.494170574	1.016171504	0.000213919	-0.247678563	0.553458275	yes	no	no	no
Ccl6	7.159850707	25.15803165	27.67670423	24.42893934	1.51604523	2.93E-25	0.201593182	0.322932296	yes	no	no	no
Ccl7	0.107459843	2.529296283	5.503122721	2.499992205	3.95511447	5.60E-11	1.162166532	0.009959026	yes	no	no	yes
Ccl8	0.081614428	1.089730399	4.856749056	5.415543199	3.172394027	7.69E-05	2.070424432	5.25E-05	yes	no	no	yes
Ccl9	41.51660597	6.345715653	25.76374953	10.27372638	-2.980921779	1.92E-93	2.040396631	8.42E-18	no	no	no	yes
Ccm2	12.45980208	15.63028045	11.99206978	12.98075057	0.027212519	0.741739206	-0.262115223	0.002746553	no	no	no	no
Ccm2l	3.170127798	1.672772439	1.449278294	1.236055235	-1.339775873	5.10E-12	0.087157771	0.804243836	no	no	yes	no
Ccna2	1.591383968	63.6293221	27.95226801	61.84198144	5.299697155	3.60E-194	-1.358295835	1.15E-16	no	yes	no	no
Ccnb1	1.068346321	78.50366845	28.74978874	74.11390213	6.078292002	2.96E-126	-1.560609244	4.22E-22	no	yes	no	no
Ccnb1ip1	0.176651506	49.83365985	3.262908003	35.73938252	7.763435348	1.39E-134	-3.866560978	3.97E-70	no	yes	no	no
Ccnb2	1.552375832	46.77028052	25.79438543	43.84324734	4.716727479	1.05E-179	-0.869898862	3.73E-10	yes	no	no	no
Ccnc	13.22900123	12.00514652	10.48712343	12.53337385	-0.445459736	0.0002444	-0.098170492	0.104840581	no	no	no	no
Ccnd1	48.36042419	7.583111432	8.203018335	9.161844045	-3.013201274	1.03E-92	0.248352517	0.197427915	no	no	yes	no
Ccnd2	12.50879858	8.953619267	7.280018482	6.30583813	-0.822509717	3.18E-13	-0.154952303	0.297810713	no	no	no	no
Ccnd3	4.615898506	10.74635565	10.62875723	11.00002522	0.971413984	7.15E-52	0.023354671	0.822286018	no	no	no	no
Ccndbp1	17.14344761	15.39598857	18.97565356	13.96391729	-0.491554624	8.59E-10	0.428521388	2.47E-05	no	no	no	no
Ccne1	3.339989246	52.40146676	18.66549899	48.72519201	3.76971483	2.31E-133	-1.473823355	1.22E-44	no	yes	no	no
Ccne2	1.430864898	9.499181549	5.348270859	9.66420563	2.469423767	1.93E-39	-0.771122536	3.41E-07	yes	no	no	no
Ccnf	2.114811741	28.69013081	8.688696951	23.92326617	3.53463944	1.34E-184	-1.654219442	1.49E-94	no	yes	no	no
Ccng1	34.61386309	46.28110975	66.51649113	55.31600143	0.22305588	0.034650256	0.514061501	0.000885195	no	no	no	no
Ccng2	11.64709375	5.616467201	20.77500756	5.957367117	-1.322394895	6.30E-24	1.947614888	2.26E-44	no	no	no	yes
Ccnh	15.22891234	22.80126785	15.98263567	20.98314752	0.32683018	0.000567487	-0.446200064	2.86E-08	no	no	no	no
Ccni	75.78894905	49.55734965	63.42911812	47.42154267	-0.837993682	2.97E-40	0.374615365	1.32E-08	no	no	no	no
Ccnj	3.499391173	8.950140669	3.149628108	6.000297531	1.030900587	5.00E-27	-1.384391615	4.22E-41	no	yes	no	no
Ccnk	12.34628075	22.42619778	12.92808871	20.13070901	0.593261731	1.01E-11	-0.730250366	9.15E-16	no	no	no	no
Ccnl1	27.35584408	30.27411329	38.74940028	30.31683744	-0.131026126	0.174456061	0.429491026	1.41E-06	no	no	no	no
Ccnl2	56.19013578	35.41981382	51.95560483	38.49323619	-0.90952473	2.35E-42	0.589333213	2.63E-17	no	no	no	no
Ccnt1	11.91508554	16.8032811	13.30274839	16.25916435	0.211956747	0.005546928	-0.246861294	0.000741969	no	no	no	no
Ccnt2	16.38389446	24.08340496	23.05636989	22.59755129	0.246746695	0.012442087	0.040418833	0.658567597	no	no	no	no
Ccny	48.3723822	42.09793721	40.51658738	43.10231914	-0.436127163	1.16E-16	-0.019608076	0.788278574	no	no	no	no
Ccnyl1	7.090193974	17.76944085	11.71220722	17.64248015	1.007956827	3.04E-29	-0.478870748	1.09E-08	yes	no	no	no
Ccp110	4.469859301	8.801117023	3.984903417	7.601611548	0.645015062	1.99E-13	-1.007609376	3.59E-22	no	yes	no	no
Ccpg1	34.52492774	23.80996908	30.91107185	26.98619159	-0.821394286	1.13E-48	0.474454474	3.90E-06	no	no	no	no
Ccpg1os	15.81453747	5.360256523	8.852732929	5.115521264	-1.851181137	3.00E-36	0.824870516	8.83E-06	no	no	yes	no
Ccr1	0.223111573	2.742658765	6.329260539	2.74911205	3.260995984	1.29E-25	1.288835142	2.50E-05	yes	no	no	yes
Ccr2	1.493128354	3.192420175	8.17151	5.411088402	0.763570731	1.78E-05	1.464787314	4.18E-10	no	no	no	yes
Ccr3	7.460972215	19.19123467	16.29141211	5.757388378	1.053756562	3.00E-12	-0.131198543	0.546852705	yes	no	no	no
Ccr5	5.242063995	2.712363843	5.723270172	3.617454486	-1.271603118	7.44E-12	1.188524384	4.07E-06	no	no	no	yes
Ccrl2	1.383406723	4.459348646	5.454181472	3.431175251	1.307511252	8.75E-15	0.453226161	0.01277371	yes	no	no	no
Ccrn4l	14.02282628	9.5500286	6.657582281	9.927178602	-0.860664573	0.000250762	-0.417113593	0.012354586	no	no	no	no
Ccs	91.3116218	72.07624421	76.47933777	68.73850496	-0.475143462	9.85E-06	0.006299825	0.970708829	no	no	no	no
Ccsap	0.637906213	7.392340792	2.99969015	7.217080181	3.249584138	4.51E-90	-1.166673379	2.25E-23	no	yes	no	no
Ccser2	32.77225234	20.12000666	50.5437797	21.39805186	-1.011603459	2.46E-50	1.442069003	9.42E-37	no	no	no	yes
Cct2	57.479225	88.41306792	65.18532225	96.351417	0.805190257	0.000167657	-0.796580247	0.002076524	no	no	no	no
Cct3	44.23477989	65.57714884	45.58881274	68.63560485	0.711299188	0.000312204	-0.848782017	0.000318245	no	no	no	no
Cct4	48.30625002	73.05631136	55.59795666	77.45830844	0.671974725	9.05E-05	-0.672112843	0.001437955	no	no	no	no
Cct5	88.88258194	123.4227818	99.43271229	132.4768761	0.761909946	0.001601285	-0.778998096	0.007898869	no	no	no	no
Cct6a	68.21867361	105.9203924	87.61076134	114.2903048	0.837136642	6.78E-05	-0.655368709	0.012381825	no	no	no	no
Cct7	22.54144443	34.90435031	24.33635492	39.41546471	0.739169373	4.53E-05	-0.813454665	0.000166997	no	no	no	no
Cct8	54.64390683	80.93679999	56.30187145	83.38442258	0.752065791	0.00048025	-0.890566354	0.000527376	no	no	no	no
Ccz1	26.60421573	42.59349657	28.16989102	42.67057703	0.542933813	6.14E-06	-0.648555592	3.70E-06	no	no	no	no
Cd14	3.626771071	4.193827874	14.77952665	6.66661089	-0.196709913	0.501495063	1.858109649	5.70E-06	no	no	no	yes
Cd151	40.80583253	28.32266004	43.070036	29.09282053	-0.828446402	1.53E-31	0.704679332	5.07E-10	no	no	no	no
Cd163	6.365883558	2.390768926	1.980598605	0.881183159	-1.772078322	1.03E-22	-0.055992004	0.837366439	no	no	yes	no
Cd164	122.9814103	94.23634804	110.5373946	100.1957675	-0.40582639	0.0050886	0.050196092	0.799073645	no	no	no	no
Cd180	1.424186808	4.725332331	4.147309886	3.931885464	1.394352958	3.13E-14	-0.046483454	0.84159232	yes	no	no	no
Cd1d1	109.5091684	11.6294017	35.5991195	14.6040073	-3.601373539	1.19E-90	1.741942233	1.79E-13	no	no	no	yes
Cd1d2	0.473581042	0.40028507	3.081875283	0.554596545	-0.522545491	0.214485835	2.834020038	1.61E-13	no	no	no	yes
Cd200	1.307123019	6.251501436	6.407382164	6.439584523	1.918756682	3.50E-27	0.165372982	0.441062919	yes	no	no	no
Cd200r1	1.500530474	3.984860043	4.402477842	3.059468624	1.042215964	1.10E-08	0.284647376	0.18080434	yes	no	no	no
Cd207	8.374772052	0.464381655	1.488338551	0.626528299	-4.441144574	1.16E-17	1.512796124	0.015516304	no	no	yes	no
Cd209c	15.96748063	17.65798752	15.31552769	16.59036558	-0.089001988	0.356534563	-0.158818512	0.093770375	no	no	no	no
Cd209f	3.75602408	0.14111541	0.265020399	0.038415897	-4.881870581	7.14E-25	0.633136961	0.43759043	no	no	yes	no
Cd244	0.307245717	4.23433994	2.395722321	1.622039647	3.48194553	1.49E-60	-0.678646626	0.000131712	yes	no	no	no
Cd247	6.162349729	13.4360658	5.51387039	12.05775803	0.825609488	2.57E-18	-1.179942113	1.25E-32	no	yes	no	no
Cd248	1.571422522	4.228425767	4.025305368	2.706868204	1.096008173	4.55E-11	0.033742592	0.897508912	yes	no	no	no
Cd24a	3.419567664	55.74943755	85.60659147	40.25654328	4.02308274	2.04E-27	0.351501991	0.478268343	yes	no	no	no
Cd27	2.930488004	3.54420418	3.559924777	3.3721831	-0.078571337	0.781011892	0.143573679	0.664599286	no	no	no	no
Cd274	2.657642018	3.664774617	5.308982738	4.400472146	0.178552809	0.309295458	0.630039644	0.000159754	no	no	no	no
Cd276	6.6323074	15.87711616	19.18771297	27.61061631	0.99271233	6.65E-14	0.373051709	0.043409165	no	no	no	no
Cd2ap	27.67855612	43.14575719	45.92218543	45.83604872	0.447741303	1.07E-07	0.098350406	0.208404215	no	no	no	no
Cd2bp2	23.11274569	27.47037188	24.06669961	27.69210198	-0.045186729	0.585744826	-0.102619482	0.340325565	no	no	no	no
Cd300a	3.183761835	10.33885109	9.348325512	8.711029082	1.38105893	7.01E-34	-0.032130991	0.86234043	yes	no	no	no
Cd300e	3.03621312	2.768327983	2.180476685	1.639802351	-0.480126555	0.002177233	-0.151991972	0.565879109	no	no	no	no
Cd300lb	1.305895868	4.652032246	4.910610935	5.161855202	1.548312331	1.78E-15	0.226095772	0.327283315	yes	no	no	no
Cd300ld	9.550697868	5.97613505	8.13734759	6.435785805	-1.046203463	4.20E-10	0.588587373	0.006291891	no	no	yes	no
Cd300lf	1.23873988	3.492066292	3.08563604	3.432377094	1.183358578	8.68E-09	-0.042007661	0.888857764	yes	no	no	no
Cd300lg	9.33984443	2.880237842	1.836123901	2.090686099	-2.041222102	7.14E-45	-0.451225384	0.020853063	no	no	yes	no
Cd302	78.26466013	32.61953393	54.22880568	39.39221989	-1.462061861	8.00E-36	0.72287492	2.46E-06	no	no	yes	no
Cd320	6.32403623	12.25989557	6.729015778	13.52168304	0.635169221	7.13E-08	-0.694431831	1.79E-05	no	no	no	no
Cd33	0.674627037	2.723378726	3.353694037	1.934012972	1.619678583	2.91E-19	0.464685326	0.023335205	yes	no	no	no
Cd34	2.475690184	16.07685955	17.85833788	17.24257554	2.34538445	2.99E-61	0.283078806	0.123617098	yes	no	no	no
Cd36	11.08619876	17.86575006	18.04169563	17.67574672	0.497789392	0.004175756	0.037516593	0.864260443	no	no	no	no
Cd38	13.98036028	12.6846854	14.29912444	11.8782798	-0.453299997	5.15E-05	0.293845608	0.035721545	no	no	no	no
Cd3eap	6.384473508	38.10621685	8.211133045	34.38850698	2.27576942	6.27E-128	-2.121739889	3.08E-104	no	yes	no	no
Cd4	1.394930696	2.942364305	3.719143139	3.212681292	0.742054356	9.91E-05	0.469966421	0.028285667	no	no	no	no
Cd40	0.77846593	1.733947267	7.736614103	2.650150714	0.993751578	2.77E-06	2.065105958	1.75E-08	no	no	no	yes
Cd44	2.820718737	13.20955731	12.31189475	9.122613885	1.9364883	1.35E-80	0.006439256	0.966548407	yes	no	no	no
Cd46	1.67321551	2.911288277	3.537603622	1.963847807	0.430011636	0.070007578	0.463433591	0.047401712	no	no	no	no
Cd47	41.35568576	26.53233496	36.86692584	22.01786431	-0.879302555	2.40E-10	0.505499192	0.000822357	no	no	no	no
Cd48	2.329942754	15.82719463	16.2671096	14.5909179	2.422072371	3.93E-58	0.125543262	0.472162146	yes	no	no	no
Cd52	5.329932282	15.84389108	22.88867214	17.61198656	1.244028463	7.05E-13	0.625162604	0.000127023	yes	no	no	no
Cd53	5.093992201	18.31681459	21.017834	18.3638274	1.579059985	1.35E-37	0.280697613	0.022616236	yes	no	no	no
Cd55	15.19229386	3.042747254	4.245961619	1.592634275	-2.683731613	3.00E-21	0.610606799	0.135886596	no	no	yes	no
Cd59a	55.01176817	9.558488271	31.58284985	18.73282891	-2.804026555	1.05E-144	1.771033496	5.55E-27	no	no	no	yes
Cd59b	8.022838139	8.581675722	6.860411637	12.69216648	0.100119402	0.590508962	-0.5133801	0.022358218	no	no	no	no
Cd5l	53.43678683	62.80947055	71.28474175	74.10270915	0.107583602	0.554877562	0.108820136	0.708770634	no	no	no	no
Cd63	10.07232777	65.08036921	71.61858779	74.09313331	2.581511119	1.84E-111	0.053176419	0.728858049	yes	no	no	no
Cd68	12.8880237	62.55434879	57.98074178	61.76123754	2.060157807	1.15E-56	-0.084562798	0.573003416	yes	no	no	no
Cd7	1.111120177	4.255541107	3.551250618	1.975963871	1.553169761	5.94E-13	-0.107490048	0.678034769	yes	no	no	no
Cd74	56.49375289	28.88245205	47.88799248	60.33856968	-1.190784629	5.06E-15	0.721929654	0.000798611	no	no	yes	no
Cd79b	2.121704607	1.686729638	3.729194508	1.003825831	-0.724519177	0.004874515	1.262119281	0.000115779	no	no	no	yes
Cd81	113.9566057	63.58145593	82.96008553	63.4593711	-1.003714183	2.41E-28	0.335037805	0.014051022	no	no	yes	no
Cd82	48.44097624	59.58789445	63.99248683	51.29689497	0.117939255	0.275688597	0.075262482	0.635278577	no	no	no	no
Cd83	1.945118583	9.953362531	12.93708434	9.824584803	1.952041127	1.66E-24	0.53394951	0.001957362	yes	no	no	no
Cd84	7.088494071	14.92053106	16.7790469	15.28856285	0.762714387	7.80E-10	0.292292678	0.065828863	no	no	no	no
Cd86	2.820297536	14.77955712	9.935206842	5.274710266	2.074163476	2.23E-60	-0.452972429	0.003912531	yes	no	no	no
Cd9	13.04413882	22.87934798	29.27010645	32.41012192	0.615316577	2.72E-07	0.380440449	0.027299041	no	no	no	no
Cd93	10.45926477	21.499902	26.52970264	24.67778779	0.708959782	1.68E-07	0.430046006	0.002126204	no	no	no	no
Cd97	17.12827646	20.20417987	17.87143516	19.75615443	-0.083913467	0.400761893	-0.048279948	0.713444566	no	no	no	no
Cd99l2	29.12986035	16.06493554	21.82011075	12.19528043	-1.14852211	1.02E-121	0.539691601	6.96E-07	no	no	yes	no
Cda	9.187423405	0.445564277	1.324579527	0.677941931	-4.5620779	6.24E-49	1.397479657	0.010066026	no	no	yes	no
Cdadc1	18.22037252	11.59476311	9.445150162	10.75343694	-0.948294512	1.45E-49	-0.18422201	0.087822163	no	no	no	no
Cdan1	6.543194043	12.05447155	9.425084596	12.14750095	0.542899626	9.26E-14	-0.212421585	0.03335256	no	no	no	no
Cdc123	23.75015184	33.58795102	26.16506008	33.90877472	0.394888068	0.00156684	-0.445224933	0.004665653	no	no	no	no
Cdc14b	19.10432582	24.70740445	34.98255236	25.51469443	0.083953426	0.383666188	0.585318415	2.37E-12	no	no	no	no
Cdc16	21.98685727	41.95983037	35.32465223	41.58626043	0.752423001	4.75E-17	-0.250694812	0.083426177	no	no	no	no
Cdc20	2.198193135	61.35185658	23.76704435	57.38282287	4.663572747	9.65E-74	-1.444284436	1.05E-24	no	yes	no	no
Cdc23	5.683007916	14.88758561	8.677864964	13.9453814	1.122732804	2.11E-106	-0.703007052	2.52E-28	yes	no	no	no
Cdc25a	3.638585131	26.68037831	14.97039177	25.07422568	2.580285497	0	-0.759820466	3.58E-25	yes	no	no	no
Cdc25b	1.032390951	12.36529934	6.665485818	8.365184607	3.230720801	8.54E-81	-0.747151264	7.42E-05	yes	no	no	no
Cdc25c	0.139982901	18.63199367	4.951438524	14.95920589	6.597615148	2.81E-109	-1.797892844	2.89E-51	no	yes	no	no
Cdc26	11.43267132	13.21253398	13.03202224	12.81846794	-0.037611879	0.586576212	0.030816786	0.691152322	no	no	no	no
Cdc27	22.49186094	38.03569813	28.03075315	37.99443091	0.534805999	2.86E-11	-0.411019209	1.26E-11	no	no	no	no
Cdc34	51.19073041	70.47931554	47.20887769	75.38839662	0.438146515	0.003441858	-0.742572823	1.57E-05	no	no	no	no
Cdc37	37.04103046	54.95056976	33.0795084	50.11689559	0.468662863	9.16E-05	-0.829362345	9.32E-08	no	no	no	no
Cdc37l1	24.84851546	19.77217151	18.75312811	20.24312344	-0.641591993	8.30E-15	0.032299888	0.746529898	no	no	no	no
Cdc40	8.773719371	12.15599751	9.304957352	10.85815356	0.219245576	0.004716779	-0.322365986	0.001214181	no	no	no	no
Cdc42	67.43765768	64.66584656	86.15651123	68.92132524	-0.11784349	0.349728404	0.258256742	0.089274264	no	no	no	no
Cdc42bpa	9.715506562	11.8670272	9.445704003	10.08939778	-0.011915992	0.87400976	-0.22892012	0.03251919	no	no	no	no
Cdc42bpb	34.31393904	32.80184145	38.55889744	39.23631224	-0.30421814	2.59E-07	0.284951185	0.001022885	no	no	no	no
Cdc42bpg	8.999490776	9.816896979	11.89284709	10.82307215	-0.225291825	0.082772623	0.432142128	0.001096472	no	no	no	no
Cdc42ep1	17.8668445	36.94412941	45.71254726	33.79002868	0.733537309	2.91E-20	0.411413555	0.000111304	no	no	no	no
Cdc42ep2	5.271082772	5.509315428	9.951503552	6.197871997	-0.305441582	0.005107123	1.008175014	6.09E-11	no	no	no	yes
Cdc42ep3	2.937628968	4.007730768	5.309598186	3.497370309	0.109078245	0.649350848	0.514751859	0.060793472	no	no	no	no
Cdc42ep4	42.00134627	27.51623413	31.52060433	28.32119765	-0.916310848	5.63E-45	0.286722697	0.000423637	no	no	no	no
Cdc42ep5	3.208540844	5.720314604	14.96029774	3.68570057	0.565165548	0.047310649	1.427444285	4.44E-06	no	no	no	yes
Cdc42se1	22.97886225	28.24041172	40.06715014	30.6581401	-0.021352276	0.792707702	0.621160034	2.96E-08	no	no	no	no
Cdc42se2	17.07684533	25.64816643	24.86547239	26.23377242	0.287935357	0.000125001	0.066621265	0.452346525	no	no	no	no
Cdc45	1.265204489	22.52019585	5.029286505	20.63416706	3.921397577	1.47E-60	-2.057015694	2.75E-28	no	yes	no	no
Cdc5l	18.87282881	37.14434907	28.83842605	35.24083459	0.792885613	1.23E-16	-0.368090427	0.002126313	no	no	no	no
Cdc6	0.481918222	15.59278895	4.804989922	14.66085202	3.626350654	3.41E-11	-1.574152516	3.76E-19	no	yes	no	no
Cdc7	0.342210449	20.33109971	3.530541785	19.64578424	5.531195493	1.87E-202	-2.400262559	1.58E-72	no	yes	no	no
Cdc73	13.71926212	29.68870956	24.66690069	29.39415639	0.889503186	3.09E-14	-0.211279961	0.079886929	no	no	no	no
Cdca2	0.432945295	23.24708991	5.728851157	21.56653562	5.414387412	0	-1.9276866	3.88E-70	no	yes	no	no
Cdca3	3.017338328	54.45943106	28.35556686	54.03657424	4.042156842	2.59E-157	-1.009176337	6.29E-16	no	yes	no	no
Cdca4	6.898279652	33.03232215	17.89002843	29.1031064	1.986308567	1.06E-161	-0.828267651	7.18E-20	yes	no	no	no
Cdca5	0.541995418	29.76260473	5.992083458	25.54807487	5.362330812	7.63E-216	-2.211548823	2.81E-96	no	yes	no	no
Cdca7	4.856616873	60.16461399	18.13939413	57.69425561	3.444531398	2.58E-164	-1.731893294	5.23E-59	no	yes	no	no
Cdca7l	0.6916264	36.55007353	5.430763876	31.06462073	5.494656525	1.46E-138	-2.687115175	1.04E-54	no	yes	no	no
Cdca8	0.642871688	19.80816072	4.723511271	17.57324036	4.681420161	0	-2.031767075	6.43E-145	no	yes	no	no
Cdcp1	0.575209302	11.70468241	8.576198016	17.56641807	4.01963332	1.81E-76	-0.332090341	0.394447256	yes	no	no	no
Cdh1	42.79477332	54.44370897	73.19238606	70.39332142	0.166219015	0.032528723	0.403980995	5.92E-06	no	no	no	no
Cdh16	0.066986501	0.351835359	1.342995784	8.791388271	2.044107094	0.000130105	1.793050091	8.15E-05	yes	no	no	yes
Cdh17	0.130481934	0.18962732	3.371157256	0.610046257	0.089399215	0.800775172	3.844877004	3.14E-17	no	no	no	yes
Cdh2	46.88632241	31.43130892	26.80091968	29.56044679	-0.816247242	6.91E-36	-0.193246126	0.013967225	no	no	no	no
Cdh5	21.7274748	18.20663722	17.35972652	18.59656173	-0.535222918	8.17E-06	0.026408835	0.888782986	no	no	no	no
Cdhr2	0.28410451	11.9108513	35.83258158	18.10611673	5.007450941	9.45E-139	1.695065182	3.04E-28	yes	no	no	yes
Cdhr5	61.65109902	7.228477112	21.18814135	7.792640249	-3.481833446	1.29E-79	1.650933403	4.77E-07	no	no	no	yes
Cdip1	23.0833907	21.91370882	26.66515692	20.10914814	-0.392514092	4.38E-07	0.389784971	1.63E-07	no	no	no	no
Cdipt	43.48197766	29.57050304	28.34727148	32.62686457	-0.858766044	1.61E-39	0.041220986	0.773977225	no	no	no	no
Cdk1	1.376795992	39.94004283	15.64175395	37.73797055	4.862721535	5.62E-130	-1.521729352	2.05E-16	no	yes	no	no
Cdk10	25.48449759	24.20101266	17.91325575	23.75627046	-0.311372474	4.24E-08	-0.358943795	1.40E-05	no	no	no	no
Cdk11b	18.71924549	22.44769974	17.07888415	20.68297479	-0.006071973	0.914526674	-0.306390331	9.72E-08	no	no	no	no
Cdk12	14.48317138	23.28605538	21.39542819	23.47767715	0.414150605	1.98E-09	-0.049781449	0.499976712	no	no	no	no
Cdk13	24.03929663	27.8296384	28.04830178	27.77555069	-0.059771915	0.33969388	0.080506434	0.204473793	no	no	no	no
Cdk16	16.80065184	30.06337956	28.63531736	27.0367109	0.555655896	3.51E-21	0.004051832	0.964286244	no	no	no	no
Cdk17	13.27363313	11.03460935	14.9052081	11.58403258	-0.544951576	4.25E-07	0.513503759	1.45E-05	no	no	no	no
Cdk18	21.64168591	19.21788081	12.42989517	20.59731678	-0.491871916	6.93E-06	-0.485478878	0.075128935	no	no	no	no
Cdk19	5.537735735	4.912921376	6.404198511	4.097434461	-0.489669897	1.13E-05	0.493629757	0.000153429	no	no	no	no
Cdk2	10.28407655	22.87008789	16.42730533	22.53902712	0.8290028	1.85E-23	-0.364465257	2.86E-05	no	no	no	no
Cdk20	6.717272724	4.620367249	4.394863523	4.202336594	-0.870919791	1.26E-13	0.078894682	0.658751004	no	no	no	no
Cdk2ap1	32.93973273	57.68468784	32.04831389	50.80360595	0.669723008	3.33E-12	-0.916309064	7.99E-12	no	no	no	no
Cdk2ap2	82.98924299	60.6184834	69.06986967	65.10540466	-0.690466743	5.33E-19	0.216840541	0.01427079	no	no	no	no
Cdk4	42.43131211	110.7686931	84.41793054	106.9123787	1.481386213	2.33E-17	-0.685252678	0.001575912	yes	no	no	no
Cdk5	17.8239088	17.57464479	18.17613311	16.93728524	-0.336787982	0.000334838	0.165894849	0.135625896	no	no	no	no
Cdk5rap1	7.260540721	11.13947461	6.400618075	9.348409012	0.35142317	0.003567011	-0.733114902	6.47E-07	no	no	no	no
Cdk5rap2	4.005151063	21.59956965	8.856857563	17.65965262	2.214491801	1.30E-83	-1.207337156	3.04E-27	no	yes	no	no
Cdk5rap3	59.34887895	38.86456858	37.09446718	36.61730406	-0.899386372	6.90E-21	0.009155221	0.945089383	no	no	no	no
Cdk6	14.44285152	41.07840631	13.12919547	28.03702972	1.267086104	1.88E-62	-1.599150784	1.09E-52	no	yes	no	no
Cdk7	10.42531169	14.57350617	15.08841173	13.6328343	0.196371213	0.015261357	0.134908933	0.181414184	no	no	no	no
Cdk8	27.83897203	49.13738419	45.14774492	48.00251921	0.590914554	1.26E-27	-0.104019201	0.234223891	no	no	no	no
Cdk9	17.40867569	23.05548273	18.28479671	22.01488632	0.133873491	0.035749567	-0.266431581	4.80E-05	no	no	no	no
Cdkal1	6.129701216	9.199337351	5.95237011	8.286997107	0.294626472	1.89E-06	-0.542212222	1.62E-17	no	no	no	no
Cdkl1	0.275001176	8.240565147	5.340468918	5.235705021	4.525808475	1.15E-47	-0.456218409	0.173570415	yes	no	no	no
Cdkl2	3.465823203	1.085408433	4.995403636	1.333017188	-1.959611904	1.04E-24	2.233307907	3.44E-27	no	no	no	yes
Cdkl5	5.411026495	8.957026181	4.35163244	5.833813545	0.399635265	0.000266248	-0.906296857	2.99E-12	no	no	no	no
Cdkn1a	2.352647898	24.45567817	29.50281944	23.5720973	3.122960857	8.42E-19	0.270293227	0.374820027	yes	no	no	no
Cdkn1b	18.55639085	26.21530026	34.54840151	27.33414528	0.204376383	0.008264678	0.505293406	2.58E-11	no	no	no	no
Cdkn1c	3.664506969	70.29462916	132.6172396	56.69889246	3.987408425	4.90E-67	0.906096431	0.000551617	yes	no	no	no
Cdkn2aip	19.57341934	17.85436474	20.85294293	19.19851385	-0.474894151	1.69E-11	0.361984193	0.000454066	no	no	no	no
Cdkn2aipnl	18.89966656	43.65686097	25.77203278	40.19368978	0.934716314	1.17E-30	-0.694578288	2.65E-19	no	no	no	no
Cdkn2c	6.393673445	7.616885205	8.74878092	10.65656739	-0.063829326	0.834436527	0.306733541	0.402075286	no	no	no	no
Cdkn3	0.704764387	6.411399575	5.206219918	5.195416104	2.852406935	8.83E-55	-0.251448955	0.073205205	yes	no	no	no
Cdo1	159.4750433	26.98256237	84.35006124	40.47804105	-2.853231181	1.11E-65	1.698693367	2.65E-17	no	no	no	yes
Cdon	1.42725006	6.314186107	5.874777423	5.447357372	1.822483422	3.47E-55	0.028443497	0.910796094	yes	no	no	no
Cdpf1	18.06668383	24.43609031	16.01389341	20.09223071	0.181768752	0.182289897	-0.536434416	1.32E-06	no	no	no	no
Cdr2	1.835003896	14.60104893	18.62059143	10.6774476	2.659372295	9.11E-23	0.460463511	0.161711487	yes	no	no	no
Cdr2l	3.366929009	6.172144924	3.330559425	5.72432012	0.544900665	5.96E-05	-0.749179971	2.49E-05	no	no	no	no
Cds2	46.65040115	20.94160098	22.66339001	22.15527684	-1.467916359	3.89E-138	0.210610561	0.007420677	no	no	yes	no
Cdt1	2.799297899	32.5547762	12.95345197	31.31195165	2.857104031	2.87E-25	-1.271965088	2.47E-43	no	yes	no	no
Cdv3	36.73390507	54.9916097	40.46652609	57.79883731	0.556899801	4.01E-05	-0.617360447	0.000150915	no	no	no	no
Cdyl	5.381017848	9.171645933	6.947049366	7.452140118	0.435711228	3.20E-10	-0.270282268	0.001037601	no	no	no	no
Ceacam1	47.55853412	2.52666647	8.763398196	4.730075162	-4.533228159	5.90E-111	1.8266905	9.21E-12	no	no	no	yes
Cebpa	129.1863732	52.47574265	78.99437906	68.51539875	-1.536831972	6.02E-76	0.608213008	3.37E-08	no	no	yes	no
Cebpb	21.66791454	9.834834219	16.63229945	14.16991256	-1.461145222	1.76E-30	0.850903019	0.000549234	no	no	yes	no
Cebpd	4.253708694	1.886811243	4.499918944	2.553581821	-1.587569862	4.69E-16	1.422544731	1.65E-07	no	no	no	yes
Cebpg	45.17797541	28.55788183	44.06410421	33.06283681	-0.944556698	1.10E-39	0.702672883	1.26E-19	no	no	no	no
Cebpz	26.91498795	49.81031281	24.52060969	49.42566622	0.696195361	5.76E-24	-1.030344514	1.76E-32	no	yes	no	no
Cecr2	14.0055129	19.37862476	14.31956105	18.14337682	0.140052539	0.093757744	-0.310579455	0.000435878	no	no	no	no
Cecr5	31.88553742	22.70982646	17.99948489	22.42224326	-0.779702581	2.94E-20	-0.23881034	0.02487214	no	no	no	no
Cela1	29.78119653	4.938439372	4.33252681	4.400441681	-2.824145595	2.87E-130	-0.177505879	0.375076161	no	no	yes	no
Celf1	37.96535244	55.52471159	43.35731929	56.31097533	0.361917482	3.17E-07	-0.372287433	1.44E-06	no	no	no	no
Celf2	3.006638545	2.82051449	3.174119568	2.167989687	-0.464023778	0.002181581	0.335202951	0.055739403	no	no	no	no
Celsr1	2.745762406	2.401626574	4.272016172	8.548203453	-0.572895394	0.036253734	0.9620223	0.010581461	no	no	no	no
Celsr2	0.466322355	4.068123915	1.278632612	2.697517307	2.692252505	3.57E-54	-1.44713453	2.21E-13	no	yes	no	no
Cenpa	6.412081855	47.69608688	23.64338006	42.55594093	2.674401919	2.88E-259	-0.986829816	3.12E-41	yes	no	no	no
Cenpb	60.88913527	50.7691656	37.25317824	41.05536103	-0.54600449	2.60E-12	-0.37886542	7.23E-08	no	no	no	no
Cenpc1	4.476217715	14.39628034	8.119820044	12.81491882	1.409139697	9.85E-73	-0.733679729	2.63E-17	yes	no	no	no
Cenpe	0.429850038	37.40938592	9.791809849	31.77918759	6.20674673	1.36E-185	-1.901282987	2.30E-65	no	yes	no	no
Cenpf	0.853815383	44.59566017	12.41471336	35.14390063	5.49309335	1.70E-274	-1.821282399	5.95E-79	no	yes	no	no
Cenph	0.338650816	29.27539963	7.996104454	25.3751131	6.002048682	2.98E-90	-1.796757847	6.38E-34	no	yes	no	no
Cenpi	0.141477739	18.67507603	4.038584715	16.82583245	6.600279158	5.79E-181	-2.088436868	2.23E-51	no	yes	no	no
Cenpj	5.650179622	6.742510887	14.45628479	9.532595882	-0.051527766	0.603235293	1.204053475	7.18E-16	no	no	no	yes
Cenpk	1.202137323	7.587664741	2.944748921	6.670213358	2.399776775	2.44E-72	-1.311121721	2.25E-25	no	yes	no	no
Cenpl	4.150579612	10.39391162	6.134590586	9.181510589	1.045908614	1.90E-32	-0.684191753	1.00E-09	yes	no	no	no
Cenpm	7.180724817	25.83454258	7.944648838	21.39943405	1.598799659	5.72E-10	-1.603235483	1.66E-24	no	yes	no	no
Cenpn	0.611689942	16.53834598	3.417827497	13.96113064	4.380422362	6.35E-116	-2.201164969	8.38E-48	no	yes	no	no
Cenpo	3.496032608	8.521689178	5.709003481	7.28308082	0.967805089	1.21E-34	-0.459694429	1.28E-08	no	no	no	no
Cenpp	2.209614935	23.03392292	7.551716845	19.54180186	3.077085136	4.65E-116	-1.541572516	9.52E-39	no	yes	no	no
Cenpq	4.20376174	18.48499582	7.93955382	20.04938061	1.907873947	1.23E-40	-1.169130317	1.03E-11	no	yes	no	no
Cenpt	2.564064628	39.78030497	17.03570438	36.53602759	3.656952461	0	-1.111336466	2.90E-16	no	yes	no	no
Cenpu	0.612161552	6.599639857	1.734806247	5.692852373	3.010577522	1.56E-50	-1.775150605	5.13E-24	no	yes	no	no
Cenpv	18.358203	45.74294645	20.9836341	43.81018956	1.209279549	2.66E-17	-1.239673668	5.90E-13	no	yes	no	no
Cenpw	3.322882177	8.7469098	4.565251409	7.93257058	1.153831402	1.17E-48	-0.881312063	1.35E-28	yes	no	no	no
Cep104	6.826593076	12.16430203	6.725861813	10.64856065	0.539951756	4.98E-08	-0.729350938	2.52E-12	no	no	no	no
Cep120	9.326372838	17.11500097	11.32297146	15.97698449	0.592559323	6.29E-14	-0.488488516	8.81E-07	no	no	no	no
Cep128	0.997128302	9.569172211	3.69890243	8.248314514	2.981425073	1.73E-160	-1.25508952	5.99E-27	no	yes	no	no
Cep135	5.692011547	10.71978288	6.195518707	10.44744741	0.600979071	1.48E-10	-0.672426838	3.07E-09	no	no	no	no
Cep152	4.803712056	16.49281386	8.310216636	14.53076366	1.496028208	2.62E-37	-0.877756697	1.11E-12	yes	no	no	no
Cep164	7.990977928	15.72128915	7.61058217	14.52532899	0.693193021	1.63E-19	-0.926400024	7.04E-24	no	no	no	no
Cep170	6.087612795	11.70259098	12.82540978	10.35798754	0.601460672	5.85E-12	0.272609822	0.001142117	no	no	no	no
Cep170b	24.02647911	32.16860584	24.53939851	33.34159867	0.121424739	0.228532285	-0.295406049	0.025937463	no	no	no	no
Cep19	9.259486393	8.848628113	14.18696351	9.932136444	-0.364134379	0.000275782	0.76698989	2.17E-09	no	no	no	no
Cep192	3.425631982	24.79570323	9.438759367	23.57424353	2.621235676	3.66E-173	-1.338415621	1.51E-49	no	yes	no	no
Cep250	4.339855527	19.49606743	7.457426465	14.87117845	1.85113135	9.28E-72	-1.256150651	6.12E-26	no	yes	no	no
Cep290	2.303845357	9.379154194	4.798220966	8.755369235	1.761507655	3.32E-46	-0.877619863	3.58E-09	yes	no	no	no
Cep350	22.43232553	20.39842158	28.64650174	19.80828627	-0.41950481	1.99E-15	0.578706049	2.15E-19	no	no	no	no
Cep41	3.240100675	4.402122052	2.596186376	4.170514661	0.137836043	0.171053994	-0.63583877	1.06E-06	no	no	no	no
Cep44	14.49833873	26.88370965	20.05162079	26.09845984	0.663880077	1.48E-09	-0.390842934	0.010888424	no	no	no	no
Cep55	0.37167325	22.56566729	6.687032967	21.41778637	5.57875472	4.76E-213	-1.639890176	5.02E-39	no	yes	no	no
Cep57	12.59070081	32.54769406	18.94454268	27.55708135	1.134722506	4.88E-76	-0.725639135	1.66E-24	yes	no	no	no
Cep57l1	4.589121365	16.06415269	10.32407149	13.72551178	1.538975529	3.42E-79	-0.533599777	1.63E-07	yes	no	no	no
Cep63	4.014731739	9.400122463	6.992074536	8.768199325	0.982894016	3.70E-43	-0.368918647	6.24E-06	no	no	no	no
Cep68	15.07732706	33.32933816	17.68585506	29.72595201	0.870087578	6.62E-63	-0.838038862	5.37E-56	no	no	no	no
Cep70	3.828734537	8.221041355	6.592954689	6.520968431	0.79677392	1.78E-13	-0.224293942	0.128722083	no	no	no	no
Cep72	1.099132535	7.351239382	2.92006873	5.631055673	2.413495098	3.87E-66	-1.216573436	1.86E-16	no	yes	no	no
Cep76	8.174971142	14.41100465	10.29749852	16.39534404	0.515982716	8.25E-06	-0.363831782	0.003694843	no	no	no	no
Cep78	3.727122948	18.57561018	6.292392117	16.21991946	2.059262689	3.19E-113	-1.491199306	8.04E-56	no	yes	no	no
Cep85	11.40913471	17.13750239	14.81415369	17.59289099	0.298387146	7.90E-07	-0.106067045	0.5006002	no	no	no	no
Cep89	2.34530466	15.34607591	4.031356759	9.514594879	2.46684685	5.74E-117	-1.837956413	4.03E-45	no	yes	no	no
Cep95	6.868021335	10.2417393	11.19789599	9.940390294	0.254046893	0.006477395	0.229171159	0.005733369	no	no	no	no
Cep97	2.716301143	5.904766093	4.088995924	6.034881254	0.785197222	1.70E-17	-0.384931789	0.000152279	no	no	no	no
Cept1	46.7747649	31.00689923	55.50142435	33.46410767	-0.850592454	2.27E-28	0.890534068	2.75E-28	no	no	no	no
Cercam	0.599273697	16.54801296	17.18356962	15.58477242	4.420510575	3.30E-157	0.158739305	0.44619618	yes	no	no	no
Cerk	2.805067136	8.249110266	8.604900523	7.498334636	1.231924055	5.30E-21	0.207118346	0.230450493	yes	no	no	no
Cerkl	3.632998515	5.056471246	11.64124901	9.372290067	0.205711209	0.296283819	1.303820105	3.68E-14	no	no	no	yes
Cers1	0.340029181	3.23848659	0.54587267	2.300982916	2.827205709	2.17E-37	-2.346248284	2.24E-26	no	yes	no	no
Cers2	140.6929241	82.69329365	92.58764199	93.74346647	-0.925784019	5.74E-27	0.11032232	0.323414329	no	no	no	no
Cers5	3.74882735	35.1502035	17.56087982	31.60065958	2.960318529	8.29E-186	-0.939715965	1.11E-20	yes	no	no	no
Cers6	21.17284188	38.17945856	47.7039574	40.90219875	0.582029735	0.000485036	0.390068055	3.62E-12	no	no	no	no
Ces1b	62.68551322	2.486933425	11.87751039	3.15330328	-4.821639441	1.21E-22	1.93210222	0.000810446	no	no	no	yes
Ces1c	115.3399306	11.25971949	41.64667876	14.78894975	-3.525886891	9.47E-12	1.616981969	0.004817972	no	no	no	yes
Ces1d	112.514521	3.824770705	24.56661719	9.112994383	-5.048048589	5.33E-26	2.361494493	6.49E-06	no	no	no	yes
Ces1e	95.42680125	1.713469512	19.39458316	11.25869259	-6.079529008	3.08E-133	3.283332785	5.68E-16	no	no	no	yes
Ces1f	116.4980446	0.260148056	1.806752675	1.812772957	-8.480303692	9.06E-34	1.948301222	0.004673882	no	no	no	yes
Ces1g	74.8221721	2.410355511	16.96391052	5.036035582	-5.009849978	5.10E-16	2.253625311	0.000301877	no	no	no	yes
Ces2a	129.231028	13.07215481	61.18427817	17.46114464	-3.570250009	1.85E-77	2.230757681	1.92E-20	no	no	no	yes
Ces2b	0.994033336	1.160305115	0.802773243	3.138377925	0.051469714	0.916594555	-0.528919766	0.123416287	no	no	no	no
Ces2c	5.965282546	0.33725339	1.381626457	0.703790815	-4.194168103	5.11E-52	1.716827726	5.66E-08	no	no	no	yes
Ces2e	63.61887018	4.28581804	16.28904774	9.852961808	-4.148777011	3.54E-79	1.902774083	3.14E-10	no	no	no	yes
Ces2g	29.05967652	6.590073362	9.069278744	6.168455714	-2.435971848	1.33E-10	0.526737684	0.312314526	no	no	yes	no
Ces3a	159.1412137	1.938524599	17.06735652	12.35843892	-5.019174247	4.97E-11	2.485164969	8.46E-05	no	no	no	yes
Ces3b	134.7734039	0.240758318	1.24113815	1.632152047	-8.738617353	5.42E-28	1.397171899	0.067645385	no	no	yes	no
Ces4a	7.148965646	0.050827556	0.239937438	0.080823461	-7.067937787	5.68E-41	1.701207757	0.007589569	no	no	no	yes
Cetn2	21.20430387	31.06232894	22.93334885	28.87642258	0.324905648	0.000147293	-0.399287648	3.48E-05	no	no	no	no
Cetn3	20.67223495	38.67778007	25.64118289	36.71900049	0.772945307	5.85E-09	-0.635156444	0.000230658	no	no	no	no
Cfb	189.489967	70.64463857	160.340523	107.0812576	-1.615083548	5.64E-50	1.143736894	1.16E-18	no	no	no	yes
Cfdp1	40.56689471	69.05879073	47.84983838	66.46239529	0.767021984	4.05E-06	-0.705448678	0.000717497	no	no	no	no
Cfh	78.71765771	11.10164781	36.22861332	19.47884838	-3.08415149	3.43E-65	1.716725973	6.54E-13	no	no	no	yes
Cfhr1	24.91338939	0.726734053	4.007678878	1.20000036	-5.405973519	6.37E-148	2.416917339	3.32E-11	no	no	no	yes
Cfhr2	44.6017373	6.928494151	22.26283069	11.49821569	-2.938379357	4.27E-41	1.700410545	1.95E-11	no	no	no	yes
Cfi	124.8720077	35.53553236	103.0524501	56.67863714	-2.04516373	6.25E-68	1.551958229	1.01E-27	no	no	no	yes
Cfl1	107.4136317	125.5568196	131.7477946	131.5333793	0.466988788	0.041061364	-0.372688478	0.202375749	no	no	no	no
Cfl2	43.22491777	41.10684129	42.41553115	45.01889154	-0.304639125	0.001439938	0.089208791	0.144640262	no	no	no	no
Cflar	45.82699721	12.07217544	35.48762602	13.63851678	-2.243800555	8.49E-165	1.663763473	8.46E-52	no	no	no	yes
Cfp	23.21272996	47.21505994	45.24708669	36.34542218	0.77910601	1.08E-10	-0.017076887	0.917848906	no	no	no	no
Cggbp1	45.18735437	38.77038916	47.72981761	43.35195597	-0.466668236	7.60E-08	0.345795371	3.28E-08	no	no	no	no
Cgn	14.30321085	23.74468163	28.54930492	26.16089675	0.459262843	2.02E-05	0.349348852	7.90E-06	no	no	no	no
Cgnl1	57.79232302	17.73774831	41.17151729	20.72180782	-2.007191828	4.43E-111	1.321441822	3.58E-31	no	no	no	yes
Cgref1	2.856327082	48.57146074	37.86480271	55.74932296	3.790148134	3.79E-180	-0.298031016	0.082701152	yes	no	no	no
Cgrrf1	18.14327928	9.15076323	13.98166671	10.01566135	-1.282235955	5.40E-132	0.702124844	2.21E-25	no	no	yes	no
Chac1	4.600028062	7.394836977	1.798834355	0.86021239	0.238128681	0.661458666	-1.565551034	0.001450473	no	yes	no	no
Chac2	42.78357539	16.51240405	30.61428749	18.90318653	-1.693969507	3.31E-50	1.019112374	5.21E-16	no	no	no	yes
Chad	7.748306674	1.996859525	3.219011787	3.744406256	-2.22729955	2.71E-16	0.698013061	0.11394616	no	no	yes	no
Chaf1a	2.087630887	22.16102254	6.443341558	22.17499899	2.732587378	8.28E-25	-1.676954122	5.90E-118	no	yes	no	no
Chaf1b	1.435773282	10.67999238	2.605454349	9.069516642	2.595834685	3.88E-63	-1.944207475	3.08E-39	no	yes	no	no
Champ1	10.03645861	41.4414896	16.56152091	35.78830383	1.789055751	5.03E-161	-1.26594587	9.41E-56	no	yes	no	no
Chchd1	47.48547111	61.17644436	52.05475607	64.62411704	0.320926828	0.016586651	-0.388574056	0.023335205	no	no	no	no
Chchd10	79.68461687	45.49630973	52.6542183	48.33758852	-0.925384454	1.63E-15	0.109098887	0.61278649	no	no	no	no
Chchd2	48.94111045	37.95330768	47.19578512	43.00241547	-0.14401962	0.564259344	-0.139684889	0.674784515	no	no	no	no
Chchd3	55.92852812	57.33692176	53.41294327	59.75102508	-0.051107739	0.661572828	-0.215583546	0.15216551	no	no	no	no
Chchd4	22.40836943	68.21672801	25.70743649	71.17593155	1.402095775	1.01E-57	-1.39764474	3.10E-38	no	yes	no	no
Chchd5	15.48475481	23.36989674	22.8723268	20.93496775	0.324457538	0.001332594	0.0416144	0.741615172	no	no	no	no
Chchd6	2.089290984	8.376889569	1.920525513	7.078521137	1.875833305	1.49E-21	-2.060527174	2.42E-22	no	yes	no	no
Chchd7	10.74237819	11.16330083	14.75659123	8.989726086	-0.172423352	0.087278621	0.437192274	0.000213989	no	no	no	no
Chd1	19.34668752	31.11946874	21.8115663	30.87744891	0.465249185	2.07E-08	-0.483489858	1.15E-09	no	no	no	no
Chd1l	7.216790977	20.82487137	7.215789342	17.22439761	1.3511121	5.22E-26	-1.49129915	3.42E-28	no	yes	no	no
Chd2	24.80409112	25.05870616	32.81664345	23.76925071	-0.275623115	0.000182817	0.484261335	2.77E-10	no	no	no	no
Chd3	29.63451324	18.25585014	27.65472938	23.17876605	-1.026793225	1.89E-35	0.721335586	8.43E-08	no	no	yes	no
Chd4	57.12388506	83.42811952	80.14828712	89.7706236	0.450386175	4.68E-06	-0.168689395	0.222841875	no	no	no	no
Chd6	7.391768116	10.6170989	10.3777297	9.174239311	0.218500111	0.000775183	0.080431624	0.435016123	no	no	no	no
Chd7	10.4002569	14.34937531	11.34448739	12.35174755	0.132107165	0.108199703	-0.205984188	0.032672379	no	no	no	no
Chd8	22.24465918	32.92236282	28.38844596	31.19286735	0.285966851	4.03E-13	-0.131119482	0.009174064	no	no	no	no
Chd9	23.30370128	18.2875021	18.90828816	17.67660664	-0.660563829	1.48E-16	0.162442025	0.130961671	no	no	no	no
Chdh	72.01101406	29.34981997	43.26737154	41.39220773	-1.592341469	1.65E-70	0.648173209	9.20E-05	no	no	yes	no
Chek1	0.760232586	18.8006807	4.220372724	17.5848966	4.303404076	1.03E-64	-2.045956436	7.24E-47	no	yes	no	no
Chek2	1.702265472	20.68089638	4.763366924	16.6023887	3.297910365	6.33E-144	-1.991867462	2.89E-67	no	yes	no	no
Cherp	11.67013363	27.55340341	12.51365289	25.45594776	0.940633763	1.29E-30	-1.02749179	6.55E-31	no	yes	no	no
Chfr	15.75487658	14.77439031	18.5421951	14.6586529	-0.381209494	3.10E-12	0.418783915	1.97E-10	no	no	no	no
Chic1	11.3973138	6.909462852	6.538253443	6.00335136	-1.101679102	1.88E-11	0.109544758	0.705488007	no	no	yes	no
Chic2	15.6146536	13.31253579	16.10926605	16.59563252	-0.54336459	8.98E-07	0.402002753	0.00061193	no	no	no	no
Chid1	21.37254566	25.27632658	25.64692006	26.19780443	-0.026429549	0.779964277	0.094279799	0.319184574	no	no	no	no
Chil3	0.156383172	9.899287141	16.72165651	14.09037011	5.499367835	4.15E-28	0.800081258	0.042855079	yes	no	no	no
Chka	12.82499903	18.97175446	32.96052349	22.22325774	0.282150125	0.050562877	0.881557106	1.47E-17	no	no	no	no
Chkb	26.18356931	23.63255162	32.12709002	21.43674787	-0.462857132	1.52E-08	0.536837105	2.81E-08	no	no	no	no
Chm	15.77657371	15.89529953	21.13545489	15.87644665	-0.274560219	0.018609309	0.498712065	1.64E-09	no	no	no	no
Chml	3.157231013	16.24817814	17.55147784	13.2404079	2.036476606	3.44E-62	0.238287762	0.124340044	yes	no	no	no
Chmp1a	62.47218571	55.23757432	59.26223163	56.47758631	-0.438701491	2.89E-11	0.156506871	0.071522494	no	no	no	no
Chmp1b	32.18708048	21.10603488	24.04562762	21.05962768	-0.921143546	8.79E-45	0.285807201	6.10E-05	no	no	no	no
Chmp2a	89.15181445	62.30717901	78.73797289	58.38055475	-0.732824469	5.95E-22	0.335282554	0.00092829	no	no	no	no
Chmp2b	29.75114371	26.89063807	42.14891114	29.83943454	-0.405129844	9.94E-11	0.703267521	6.51E-25	no	no	no	no
Chmp3	44.46871273	35.79461437	39.30135365	37.40701803	-0.556191764	3.43E-19	0.170103651	0.030160389	no	no	no	no
Chmp4b	31.541865	33.92262497	35.62273594	34.30447101	-0.071013209	0.558628703	0.045300711	0.768260806	no	no	no	no
Chmp4c	2.581580066	9.546988563	18.99461955	7.498362016	1.545214561	7.96E-26	1.122452771	9.96E-12	yes	no	no	yes
Chmp5	30.32273432	22.01179316	33.12507179	24.24257507	-0.663474543	8.80E-14	0.595548445	1.73E-07	no	no	no	no
Chmp6	24.3785127	24.38191506	19.93366253	25.32442991	-0.29422803	0.005146158	-0.170328088	0.128559165	no	no	no	no
Chmp7	43.28336245	32.42452654	33.2693151	30.29026307	-0.717534614	4.46E-22	0.135066621	0.034114958	no	no	no	no
Chn2	23.80576703	1.18160011	2.953742332	1.18115996	-4.587251117	2.06E-280	0.485748087	0.049990294	no	no	yes	no
Chordc1	41.6129096	45.89717216	44.03685525	53.98203571	-0.034586903	0.745775574	-0.069774219	0.529417408	no	no	no	no
Chp1	81.08695336	43.4730119	58.68844802	38.31771646	-1.128941261	5.17E-95	0.458352698	3.60E-08	no	no	yes	no
Chp2	8.155490278	1.878036241	8.008467494	1.231120281	-2.593427683	8.39E-31	2.246629149	6.16E-11	no	no	no	yes
Chpf	1.435179924	8.834002224	6.97667637	9.552597936	2.246009618	1.12E-50	-0.157739854	0.487326453	yes	no	no	no
Chpf2	21.42247422	15.38463034	25.88548695	14.2540573	-0.831831991	1.99E-17	0.893536059	2.53E-16	no	no	no	no
Chpt1	45.55742831	9.398826257	10.64172113	11.39209768	-2.580716246	3.49E-65	0.262607221	0.070435852	no	no	yes	no
Chrac1	14.77710208	20.77273606	17.59429657	20.09314155	0.271539145	0.00054043	-0.234655413	0.0333176	no	no	no	no
Chrd	6.585687243	0.402405634	1.672505712	0.852684027	-4.348171581	4.00E-59	2.041110832	6.57E-07	no	no	no	yes
Chrna2	6.259665326	0.476110988	0.953612828	0.303693444	-3.968340262	5.10E-72	1.052011519	0.001322423	no	no	no	yes
Chrnb1	0.778051307	1.773478149	21.07905282	3.591300267	0.909880087	2.10E-06	3.509948732	9.89E-42	no	no	no	yes
Chst12	1.086278593	7.058685757	2.575979039	6.705478495	2.301174549	5.84E-36	-1.244179935	1.05E-11	no	yes	no	no
Chst13	20.46155764	32.65838051	24.50524848	43.39504866	0.398836179	0.001389781	-0.327672986	0.043990957	no	no	no	no
Chst14	2.638542346	5.153822031	5.534253941	5.189692112	0.602201055	0.000122833	0.255471787	0.163502487	no	no	no	no
Chst15	13.43102839	5.024448341	5.925933499	4.330033111	-1.743992275	2.44E-36	0.341689109	0.227603357	no	no	yes	no
Chsy1	6.985167139	19.58408501	9.436932756	15.10082087	1.177515292	9.87E-70	-0.948815906	3.93E-23	yes	no	no	no
Chsy3	6.859392534	2.888454024	5.216283839	3.899131964	-1.597535067	1.63E-30	0.99412588	5.35E-09	no	no	yes	no
Chtf18	0.313099023	14.74544128	2.41954846	10.21151566	5.115119095	7.91E-184	-2.445345427	6.59E-120	no	yes	no	no
Chtf8	48.17422639	77.99144772	60.72068989	81.73209563	0.56737175	3.05E-09	-0.445534391	0.00075777	no	no	no	no
Chtop	43.72072494	46.14680805	42.00865805	48.394618	-0.166436052	0.000879577	-0.085997051	0.086930464	no	no	no	no
Chuk	63.54835812	30.68140928	41.35028905	33.6364524	-1.275041224	3.32E-46	0.461471252	6.85E-07	no	no	yes	no
Churc1	33.65335811	28.05356696	31.81870642	27.41747845	-0.420100281	9.18E-05	0.137522444	0.342667791	no	no	no	no
Ciao1	32.73221949	27.49147912	30.57839276	28.63240192	-0.513801444	2.43E-15	0.221644088	0.013406472	no	no	no	no
Ciapin1	13.14935299	17.83047978	13.52719467	16.95666997	0.24204287	0.008282546	-0.396992647	0.003947689	no	no	no	no
Ciart	11.16188752	5.019582778	1.512170942	4.232860507	-1.486123211	3.69E-08	-1.563567096	3.57E-14	no	yes	yes	no
Cib1	57.30627234	36.2450282	45.32628881	37.13186111	-0.883641633	7.49E-18	0.344389295	0.015231977	no	no	no	no
Cib2	7.305438608	2.291828164	2.517076678	2.282822259	-1.939144103	8.76E-26	0.163173473	0.6550889	no	no	yes	no
Cib3	4.624783355	0.255456146	0.145937795	0.573958528	-4.064708483	2.93E-07	-0.390642049	0.65630271	no	no	yes	no
Cic	11.5543152	14.30224227	12.91892085	14.61962621	-0.050640629	0.714133184	0.010848548	0.952303595	no	no	no	no
Cideb	28.1149611	11.14694304	22.17557515	12.62027418	-1.585405123	7.64E-71	1.02216955	3.05E-23	no	no	no	yes
Cidec	5.236385761	1.812305203	7.619024225	2.536081867	-1.85151422	1.00E-17	2.031938843	7.50E-07	no	no	no	yes
Cinp	10.27141121	26.49764784	9.875786216	24.45049112	1.088781952	1.87E-73	-1.352043964	7.20E-73	no	yes	no	no
Cipc	29.19379175	22.43887116	11.64907223	17.35334698	-0.682985909	1.07E-32	-0.838260214	7.52E-24	no	no	no	no
Cir1	13.22500505	14.23926952	11.68150876	10.68023184	-0.180577646	0.076030833	-0.227109271	0.114336394	no	no	no	no
Cirbp	28.49735643	24.30786954	18.43470991	13.87483542	-0.558040597	1.35E-05	-0.268400206	0.076645845	no	no	no	no
Cirh1a	12.25450427	48.02179105	14.1060011	42.35804368	1.82801714	5.50E-49	-1.780489404	1.29E-27	no	yes	no	no
Cisd1	94.61795243	55.79820549	54.39202755	57.75127969	-0.899390004	1.93E-15	-0.119427291	0.457991315	no	no	no	no
Cisd2	20.05233566	19.9424645	17.38962464	19.01571316	-0.28046884	0.001082049	-0.122090612	0.145185784	no	no	no	no
Cisd3	35.94572476	51.36462777	17.46860497	43.41286933	0.357850247	0.002555153	-1.60297733	1.07E-21	no	yes	no	no
Cish	22.2480139	11.07126913	33.93799217	12.8449861	-1.302990577	0.0008995	1.699429139	1.14E-15	no	no	no	yes
Cit	0.476779312	7.871597154	4.365550816	8.412528824	3.747855339	1.14E-188	-0.679067234	0.000971901	yes	no	no	no
Cited1	0.163929873	18.34321942	25.7039621	13.1471385	6.446250915	6.18E-60	0.63061747	0.008441692	yes	no	no	no
Cited2	20.37500337	35.74745113	38.43291855	29.11486178	0.534475752	6.15E-08	0.181981132	0.128022561	no	no	no	no
Ciz1	12.68421481	15.90285307	13.09986584	12.64898804	0.004629107	0.955900811	-0.141575401	0.080939889	no	no	no	no
Ckap2	1.047717734	34.55475595	13.10666952	32.70615497	4.81253785	4.63E-85	-1.360245532	6.20E-20	no	yes	no	no
Ckap2l	0.535500998	27.61852676	10.22953339	24.81193392	5.367332348	1.12E-157	-1.364433584	3.34E-37	no	yes	no	no
Ckap4	3.811212516	4.968956136	20.52781008	6.468352552	0.03999356	0.84046006	2.085083343	5.72E-13	no	no	no	yes
Ckap5	12.98274632	39.61760578	22.49108116	37.59748647	1.40986963	3.54E-74	-0.79685067	5.07E-17	yes	no	no	no
Ckb	6.049464341	20.77206492	20.60302541	22.70638986	1.442098798	1.47E-16	0.111604798	0.645587684	yes	no	no	no
Ckm	0.026345677	15.745538	9.629010434	1.404342259	8.23493039	2.09E-31	-0.536130573	0.409228113	yes	no	no	no
Cks1b	14.69919272	59.52903972	31.9722029	58.10219295	1.891509134	6.78E-20	-0.921584083	1.71E-09	yes	no	no	no
Cks2	21.83670794	50.41735968	46.7175414	53.55816072	1.198844708	1.17E-13	-0.28528252	0.147157383	yes	no	no	no
Clasp1	8.614466366	14.06563895	15.39231736	12.58904734	0.411922686	6.29E-20	0.234983699	0.000318161	no	no	no	no
Clasp2	6.780144118	13.17938117	10.24058138	11.45451747	0.666591443	1.73E-28	-0.267723093	0.000946799	no	no	no	no
Clasrp	4.39861175	8.779965119	5.898877685	8.262404984	0.684149393	4.93E-09	-0.439085859	0.000275955	no	no	no	no
Clcc1	25.0692873	20.18920964	16.89406916	21.58487012	-0.567731524	3.97E-26	-0.194787502	0.005198852	no	no	no	no
Clcf1	0.320425587	2.363528283	3.833835158	3.782332291	2.453340744	2.65E-22	0.825798942	0.013098684	yes	no	no	no
Clcn2	29.22272394	11.14349422	7.517097992	8.823957004	-1.722370298	1.87E-101	-0.446124772	0.000111448	no	no	yes	no
Clcn3	18.04466471	20.32797012	27.38251722	20.77362478	-0.085264903	0.19734897	0.490844056	6.66E-11	no	no	no	no
Clcn4-2	30.8787679	13.64221118	20.38388564	12.9698371	-1.469920549	8.68E-162	0.679373447	4.19E-25	no	no	yes	no
Clcn5	7.118620606	24.94953861	30.39696646	25.88814052	1.539103454	1.44E-85	0.36091005	0.005435126	yes	no	no	no
Clcn6	2.539463015	7.18333071	5.57217369	7.088195437	1.220805203	1.36E-21	-0.234525152	0.138947961	yes	no	no	no
Clcn7	43.00580791	12.25444723	13.13937197	14.24367129	-2.11163889	4.64E-243	0.208158068	0.144089601	no	no	yes	no
Cldn1	80.1912029	19.39199393	83.28024206	38.69562558	-2.374207943	4.58E-51	2.198539303	2.15E-30	no	no	no	yes
Cldn12	63.56672034	35.05312654	53.49558085	39.46078595	-1.1387279	1.86E-61	0.68165856	7.94E-30	no	no	yes	no
Cldn13	0.009491984	14.9992871	14.1959401	6.915827929	8.423077792	2.16E-19	0.111872067	0.861577994	yes	no	no	no
Cldn14	18.12589835	2.06860678	8.063855856	8.45128059	-3.458527076	2.51E-38	1.970272439	6.96E-08	no	no	no	yes
Cldn18	0	0.390933865	7.872704717	0.397274589	6.13933322	2.12E-07	3.633246707	3.90E-11	yes	no	no	yes
Cldn2	75.25427205	17.90776453	66.82203989	20.11783175	-2.390313429	8.52E-50	1.97344232	1.13E-22	no	no	no	yes
Cldn20	4.002100665	5.135677052	3.207395469	4.0270022	0.020972817	0.930765973	-0.509367749	0.034514389	no	no	no	no
Cldn23	0.083123102	0.070816781	3.196410102	0.050233385	-0.650817032	0.355391963	4.36356685	2.14E-13	no	no	no	yes
Cldn3	92.84578576	5.949019568	33.07173935	6.809399786	-3.690387919	3.71E-11	2.198277986	7.33E-05	no	no	no	yes
Cldn4	0.083160748	1.375285005	28.94575831	8.155334682	3.140110789	6.83E-06	3.810902602	1.42E-10	yes	no	no	yes
Cldn5	14.91587093	9.871413487	9.318470139	6.450742151	-0.989911349	6.58E-07	0.089911453	0.694914556	no	no	no	no
Cldn6	0.471742642	3.804199945	75.6702488	22.21589338	2.444738243	6.10E-05	3.589203316	5.35E-10	yes	no	no	yes
Cldn7	0.527921241	8.293398472	21.808726	16.8280426	3.674211879	1.11E-58	1.472760492	1.51E-16	yes	no	no	yes
Clec11a	3.627718767	2.217205233	2.092853316	2.176188308	-1.011371301	5.72E-09	0.057649942	0.886505085	no	no	yes	no
Clec12a	2.522776044	8.098004463	10.2252584	9.950944407	1.366000057	4.00E-29	0.449271202	0.004456803	yes	no	no	no
Clec14a	15.81352268	6.512230047	7.78370742	5.273593571	-1.638405356	2.22E-32	0.408113181	0.026805546	no	no	yes	no
Clec16a	12.97179892	7.707601355	8.333746916	9.680412795	-1.090533849	5.19E-28	0.244955529	0.039572803	no	no	yes	no
Clec1a	3.600527204	3.316114225	3.483405352	2.48366948	-0.493584983	0.000105816	0.25993369	0.173489109	no	no	no	no
Clec1b	12.8840845	5.127220676	6.423196117	5.584303453	-1.689398402	2.45E-11	0.477446411	0.25372347	no	no	yes	no
Clec2d	127.555527	31.61323433	57.23840908	33.70425448	-2.254140588	6.90E-111	0.867685885	3.57E-17	no	no	yes	no
Clec4a1	1.36452135	5.491167832	5.812386507	3.179833475	1.77499279	1.89E-14	0.125930974	0.658050736	yes	no	no	no
Clec4a2	0.63954659	4.152435429	4.523498949	2.937311353	2.362812896	5.60E-34	0.241402191	0.217676778	yes	no	no	no
Clec4a3	2.048485572	7.652967813	9.938507665	6.095571605	1.661630103	7.40E-19	0.458822613	0.026202755	yes	no	no	no
Clec4f	64.91516963	9.027846409	14.19750057	4.406387558	-3.093627048	1.19E-06	0.604856184	0.405744606	no	no	yes	no
Clec4g	70.67415408	4.306979749	12.19442974	3.056389695	-4.179977816	4.56E-12	1.222235112	0.069398471	no	no	yes	no
Clec4n	2.521734507	35.46071555	28.55496671	18.73130541	3.574791409	5.20E-115	-0.291402746	0.055430352	yes	no	no	no
Clec7a	3.88070251	25.59179379	30.35985577	36.77268945	2.442822153	8.43E-71	0.335989499	0.062642256	yes	no	no	no
Clec9a	3.51859315	1.779861055	1.646952697	1.282697221	-1.326422258	1.76E-07	0.032497186	0.948071064	no	no	yes	no
Clic1	25.86072434	32.53004037	48.7359818	35.32979165	0.048731735	0.72364687	0.652439504	4.53E-08	no	no	no	no
Clic3	16.47946626	4.153549264	10.40020651	4.231343963	-2.310862626	5.40E-22	1.405601437	4.57E-08	no	no	no	yes
Clic4	51.24842427	60.00026705	67.21903806	62.40091445	0.034135713	0.639196046	0.15031524	0.075675643	no	no	no	no
Clic5	0.440087882	5.425323224	10.89525624	5.529157287	3.208853007	9.36E-39	1.14111096	0.000564564	yes	no	no	yes
Clic6	0.101669092	23.59580938	22.31236761	19.46777721	7.575508856	7.16E-147	0.02153758	0.952834408	yes	no	no	no
Clint1	17.68519903	25.71662701	26.11536986	27.29331159	0.326137173	9.50E-08	0.031995385	0.727585469	no	no	no	no
Clip1	17.46454271	21.62912371	15.03033599	21.61513518	0.048838022	0.468326978	-0.464418558	2.74E-07	no	no	no	no
Clip2	2.360889282	2.19434645	4.091149111	3.799064093	-0.44316443	0.004108261	1.053582243	3.39E-06	no	no	no	yes
Clk1	39.43494695	39.40432774	57.01821738	37.48555068	-0.191504461	0.032545511	0.515466675	2.17E-06	no	no	no	no
Clk2	7.179537329	11.84577469	9.764152986	11.35467595	0.398153099	3.10E-06	-0.147475721	0.152646841	no	no	no	no
Clk3	21.48914848	21.6233291	18.79692259	19.99098583	-0.29228771	3.53E-06	-0.105477658	0.125236335	no	no	no	no
Clk4	38.15833494	37.50605436	45.5411799	36.22036249	-0.286717406	4.01E-05	0.341771921	1.31E-07	no	no	no	no
Clmn	41.09874128	22.16366128	28.77171442	23.83270707	-1.219847646	3.01E-27	0.495002341	4.94E-05	no	no	yes	no
Cln3	5.683422647	6.491207975	6.083571956	4.810912697	-0.062587334	0.519375546	0.008561204	0.959049286	no	no	no	no
Cln5	24.86286814	13.59419647	20.69482618	16.25241822	-1.195339144	2.22E-51	0.738568714	3.54E-13	no	no	yes	no
Cln6	2.29737895	18.22292487	18.94675731	16.16959469	2.653408365	1.22E-88	0.181284063	0.370693935	yes	no	no	no
Cln8	16.06730891	14.78227435	13.19220524	14.96124631	-0.44381749	1.26E-09	-0.048438685	0.605880416	no	no	no	no
Clns1a	32.15520607	60.45585479	29.3248471	59.18634484	0.73246797	4.07E-19	-1.054857465	3.04E-26	no	yes	no	no
Clock	26.93339949	21.66406366	20.97653784	18.98897637	-0.612718198	2.05E-10	0.058387672	0.410283453	no	no	no	no
Clp1	28.79091787	33.65184731	30.1383676	32.88885674	-0.056568108	0.484148937	-0.066625148	0.512464068	no	no	no	no
Clpb	10.74771591	11.1571256	7.910740762	10.79916956	-0.214185794	0.000154766	-0.4213668	2.92E-09	no	no	no	no
Clpp	39.23625365	50.53424413	22.53694643	44.90896109	0.152742741	0.16581497	-1.167617195	3.24E-19	no	yes	no	no
Clps	0.078687496	30.87228487	45.50643986	1.511955931	7.770172697	1.06E-26	0.537446208	0.306738007	yes	no	no	no
Clptm1	33.46252885	30.9426081	25.53535399	31.51565449	-0.319770052	9.86E-07	-0.280923177	0.002559326	no	no	no	no
Clptm1l	56.49938024	48.20662666	49.21857905	52.05316769	-0.393408763	1.21E-05	-0.003079548	0.985707171	no	no	no	no
Clpx	45.19848794	30.39100829	45.38096416	35.9968334	-0.762499816	1.59E-12	0.581625098	1.09E-06	no	no	no	no
Clrn3	0.00374853	3.147614952	2.490430095	3.255316561	8.054131121	2.44E-19	-0.145129012	0.807859871	yes	no	no	no
Clspn	0.410989379	15.76644646	3.974570087	14.13852248	4.902424469	2.42E-216	-1.875979946	3.70E-65	no	yes	no	no
Clstn1	3.882969429	6.55464242	5.865061297	5.755652369	0.39906607	0.006198076	0.020199742	0.924896197	no	no	no	no
Clstn3	2.038495232	0.670654273	1.112772649	3.334947878	-1.986093989	3.95E-22	0.922482753	0.000270667	no	no	yes	no
Clta	42.75355647	41.88770745	49.46667555	45.61736731	-0.116427319	0.336071388	0.115673679	0.479774861	no	no	no	no
Cltb	17.91038618	9.038478684	11.06934895	10.39042257	-1.310034235	1.79E-60	0.420457665	0.004265953	no	no	yes	no
Cltc	69.10218875	65.96752518	87.2232896	73.92951344	-0.102102618	0.456433433	0.230208204	0.178156151	no	no	no	no
Clu	131.1480501	22.75579048	85.67232143	55.1526334	-2.789472697	2.52E-12	1.794494332	9.30E-05	no	no	no	yes
Cluap1	9.482680721	21.28066141	10.58715365	17.41386184	0.919482796	5.52E-15	-0.899017193	1.47E-11	no	no	no	no
Cluh	98.67545384	98.09682068	85.63092094	102.2719623	-0.069553699	0.582234303	-0.346166684	0.018085109	no	no	no	no
Clybl	31.67684908	42.61307701	27.04172024	38.01263906	0.263397355	0.015633019	-0.700642776	5.71E-06	no	no	no	no
Cma1	0.045934969	0.1413773	0.10206124	3.225506138	1.068507708	0.305983825	-0.12242395	0.893095205	no	no	no	no
Cmah	73.86281111	15.19232648	17.70351615	18.2793723	-2.000534345	1.86E-14	0.025176068	0.933631134	no	no	yes	no
Cmas	40.52738892	34.22723775	35.59948454	39.970546	-0.484090266	9.78E-10	0.11304836	0.284284198	no	no	no	no
Cmbl	87.68886503	16.95753246	28.69922527	17.85523516	-2.643084778	2.54E-181	0.828796442	4.92E-11	no	no	yes	no
Cmc1	28.01694003	22.89640896	19.90768811	20.03676465	-0.515557264	9.02E-09	-0.181522646	0.043854072	no	no	no	no
Cmc2	12.02422106	17.09032271	11.09719365	16.59858509	0.249280478	0.006115339	-0.56863587	3.85E-06	no	no	no	no
Cmip	17.19531116	16.29599024	21.31847295	20.54888241	-0.388517264	0.000263073	0.505484702	9.29E-06	no	no	no	no
Cmklr1	3.379835329	6.155360067	5.831263287	5.022358211	0.514383601	0.000320061	0.05490773	0.76866024	no	no	no	no
Cml1	132.3215754	14.79057866	39.57168945	21.99971459	-3.449980064	3.70E-220	1.482079904	9.73E-21	no	no	no	yes
Cml2	181.5500048	1.586759471	3.444486861	7.660156169	-7.023837735	6.34E-37	1.020902795	0.127898355	no	no	yes	no
Cmpk1	57.7117961	44.95071966	55.72206977	45.41147107	-0.555842994	2.43E-09	0.315160324	0.000323562	no	no	no	no
Cmpk2	3.224574958	5.533766968	9.478971247	5.146882462	0.467265668	0.005559447	0.891963181	8.79E-09	no	no	no	no
Cmss1	4.589981838	27.86264197	4.124990319	23.80547913	2.362776863	2.92E-93	-2.70857224	2.37E-99	no	yes	no	no
Cmtm3	6.147154498	7.198856217	8.781002844	6.323311346	-0.099001602	0.534031963	0.407676109	0.014772243	no	no	no	no
Cmtm4	25.7287374	35.87856633	31.04947692	42.50371095	0.194492348	0.005353933	-0.132289548	0.255031057	no	no	no	no
Cmtm6	71.93977487	46.08064511	53.04109688	43.07760261	-0.915917927	3.39E-60	0.270861984	7.02E-05	no	no	no	no
Cmtm7	1.383013359	14.24135034	5.965162954	15.42174126	3.044909213	1.16E-195	-1.176663228	3.68E-35	no	yes	no	no
Cmtm8	20.30058206	19.78804178	17.29834568	20.49368489	-0.316830401	2.42E-07	-0.119447344	0.106219152	no	no	no	no
Cmtr1	28.89005728	27.66382176	24.87606684	27.59086111	-0.302926461	4.36E-05	-0.100356402	0.336391271	no	no	no	no
Cmtr2	5.492209496	11.7678212	6.543529434	10.03810931	0.785343697	1.86E-18	-0.695054016	4.90E-06	no	no	no	no
Cnbp	96.84281372	96.68415282	85.79598074	105.0223621	0.154918478	0.468882424	-0.524699209	0.03368534	no	no	no	no
Cndp2	32.70957891	42.77721448	34.01777585	37.7809391	0.17260507	0.060137925	-0.301482305	0.020528824	no	no	no	no
Cnep1r1	11.61443477	14.67563837	14.24800819	16.19111529	0.073500461	0.395066646	0.027951198	0.74353572	no	no	no	no
Cnih1	39.97526293	48.54636435	36.12039717	46.63516868	0.102574362	0.300559889	-0.425228977	8.28E-08	no	no	no	no
Cnih2	2.38664684	2.412938032	4.603682212	1.938945455	-0.326185441	0.178226631	1.018155138	2.30E-06	no	no	no	yes
Cnih4	9.704152992	17.20894455	12.2115375	15.2907856	0.500887186	2.05E-09	-0.363563509	0.000737078	no	no	no	no
Cnksr3	10.07235847	12.92982393	17.72502824	11.95356621	0.056304833	0.614303824	0.569094503	2.92E-07	no	no	no	no
Cnn2	8.117405062	15.85005332	28.04814888	14.86197933	0.621680764	6.66E-08	0.958361908	7.81E-09	no	no	no	no
Cnn3	74.21459595	62.96366918	79.88256144	63.37662623	-0.412594907	8.10E-08	0.309874654	0.002695595	no	no	no	no
Cnnm1	0.120759686	4.750834229	0.278993858	2.703437353	4.788863641	5.96E-87	-3.761294633	1.62E-44	no	yes	no	no
Cnnm2	8.185882758	4.925448553	7.216857369	5.694851554	-1.105854043	1.23E-20	0.729436545	3.40E-05	no	no	yes	no
Cnnm3	9.426988292	13.24289363	8.781927835	12.34098675	0.173215197	0.051309104	-0.47465605	2.53E-05	no	no	no	no
Cnnm4	3.985610449	4.874087561	4.018890388	4.333951013	-0.082959537	0.536375578	-0.117467216	0.597306534	no	no	no	no
Cnot1	35.95687871	50.25832982	52.64844046	52.744469	0.380403557	0.000631493	-0.033773396	0.851227154	no	no	no	no
Cnot10	7.670659577	16.18026232	9.24339406	13.75555136	0.833664055	5.99E-35	-0.746934736	3.02E-19	no	no	no	no
Cnot11	12.90707724	19.62328919	15.20853085	21.04165184	0.300337939	3.56E-06	-0.251437782	0.000125589	no	no	no	no
Cnot2	22.91223976	30.93595829	26.08973218	29.97534248	0.201158125	0.01660497	-0.212904057	0.005100173	no	no	no	no
Cnot3	7.958311118	14.33422278	10.76103219	12.76696276	0.50304414	4.77E-08	-0.272668381	0.007045864	no	no	no	no
Cnot4	9.804673844	17.62062556	15.39395279	18.57367779	0.529425412	1.73E-09	-0.075246797	0.317058634	no	no	no	no
Cnot6	24.07417072	35.29773008	35.83236481	36.11680721	0.344619196	1.46E-05	0.034259386	0.663299851	no	no	no	no
Cnot6l	25.80063058	30.75448728	27.01941201	30.25652635	0.037970727	0.759184221	-0.164776904	0.072552394	no	no	no	no
Cnot7	17.85688816	27.4482003	27.72497011	28.19091573	0.373251345	2.43E-06	0.064901877	0.519603015	no	no	no	no
Cnot8	54.93965005	38.04862089	53.9705479	44.15679652	-0.768705832	2.82E-27	0.538889903	1.65E-10	no	no	no	no
Cnp	20.07552393	8.054925875	15.28325981	9.726926516	-1.664690971	5.59E-66	1.051498004	3.83E-10	no	no	no	yes
Cnppd1	35.09829956	19.62883142	29.18137533	19.51229681	-1.172440499	1.08E-96	0.706630858	9.71E-26	no	no	yes	no
Cnpy2	58.95072428	44.8028183	54.20457504	41.59158612	-0.622472965	4.69E-12	0.295121206	0.009097955	no	no	no	no
Cnpy3	51.5221702	36.85373442	29.22384102	35.98695746	-0.757390025	6.09E-22	-0.259375187	0.000368188	no	no	no	no
Cnpy4	11.71655381	16.73134229	15.15380916	14.97741767	0.207362505	0.073860338	-0.041846104	0.758583794	no	no	no	no
Cnr2	7.088872212	1.627565032	2.500133761	1.493988538	-2.444980122	1.31E-29	0.751047055	0.00276439	no	no	yes	no
Cnst	7.412152861	9.335996801	7.295345133	8.623128082	0.007747142	0.943376638	-0.222128882	0.053515282	no	no	no	no
Cntnap1	1.499465128	6.032058331	2.210662315	7.361630925	1.631406473	2.80E-17	-1.250935851	6.42E-09	no	yes	no	no
Cntrob	4.749935485	8.017242534	5.157241557	6.763150102	0.407608084	0.000359959	-0.479833419	6.48E-05	no	no	no	no
Coa3	73.40701108	76.93621725	73.71544897	77.05740595	-0.1460109	0.067395719	-0.064521392	0.539010851	no	no	no	no
Coa4	9.562446862	12.74572032	14.57433822	13.02213361	0.107862511	0.348787614	0.304116569	0.021052814	no	no	no	no
Coa5	62.65537153	59.75335825	45.48207822	53.61409119	-0.294744913	1.21E-06	-0.371665282	1.63E-07	no	no	no	no
Coa6	40.2879654	46.65549641	43.39588709	46.97517122	-0.034683571	0.633883539	-0.06095821	0.583646727	no	no	no	no
Coa7	17.82663125	25.34377352	21.6199909	24.12207127	0.226283434	0.000387426	-0.135565263	0.2416522	no	no	no	no
Coasy	87.41217051	42.5962247	41.06876179	45.12566143	-1.306924926	6.93E-98	0.00895186	0.937905075	no	no	yes	no
Cobl	10.42549914	7.006752078	7.283898026	7.566439963	-0.90119024	1.24E-05	0.174498144	0.414906377	no	no	no	no
Cobll1	13.68512124	8.589504987	12.84070411	9.633659051	-1.01427274	1.76E-18	0.71979689	6.41E-08	no	no	yes	no
Cog1	17.43506147	17.60215296	17.93755739	19.39616765	-0.28956388	1.77E-05	0.133636955	0.077137028	no	no	no	no
Cog2	13.19823861	21.20930038	17.51896036	17.54939186	0.49229074	9.05E-05	-0.231360033	0.163693305	no	no	no	no
Cog3	18.14923096	21.05795724	24.83618613	20.68765157	-0.070294088	0.405811016	0.326004767	0.000119615	no	no	no	no
Cog4	41.66016705	33.07848992	38.97659225	34.38941188	-0.580920094	1.67E-07	0.301884942	0.046727657	no	no	no	no
Cog5	12.70480687	16.60944906	14.12225768	14.3912717	0.152855943	0.255801712	-0.180938477	0.291190256	no	no	no	no
Cog6	18.70167542	12.35886309	22.30094817	12.86100868	-0.876932122	2.40E-20	0.937063613	4.98E-16	no	no	no	no
Cog7	18.17587471	15.77869979	13.55317919	14.58850898	-0.473245111	1.57E-07	-0.125589301	0.245450631	no	no	no	no
Cog8	19.8324895	15.27318672	18.7149976	16.65835374	-0.70347629	5.77E-15	0.428425654	0.001498992	no	no	no	no
Coil	5.2226372	21.86292267	7.962662818	16.06484588	1.788654266	4.15E-101	-1.364369022	8.27E-41	no	yes	no	no
Col10a1	3.134751059	2.105340005	1.488597004	1.444431888	-0.845882904	3.58E-07	-0.393239795	0.122576938	no	no	no	no
Col12a1	1.456612416	2.841574647	3.287988529	2.982008629	0.657128946	0.001400173	0.35952875	0.265733468	no	no	no	no
Col13a1	4.046870858	0.680478519	0.465222435	0.261891282	-2.847774446	1.97E-36	-0.338076939	0.330055502	no	no	yes	no
Col14a1	24.97458521	15.72294147	12.69674213	11.26753883	-0.903515508	1.67E-09	-0.220464833	0.373500244	no	no	no	no
Col15a1	5.800015856	7.339804865	7.091367534	11.7303321	0.107944008	0.664589167	0.116306204	0.726630463	no	no	no	no
Col18a1	116.152596	58.75442558	92.82169032	70.01421624	-1.138599073	3.34E-32	0.604598623	1.37E-08	no	no	yes	no
Col1a1	4.85302845	32.82465929	24.78621449	30.45164751	2.534926638	1.19E-37	-0.346201505	0.159246298	yes	no	no	no
Col1a2	6.245524292	18.14936212	15.26740081	16.4993629	1.381071232	6.40E-18	-0.218063025	0.319031376	yes	no	no	no
Col20a1	5.178259053	1.737426677	5.51742722	1.700262305	-1.934907097	2.59E-33	1.808031993	2.80E-19	no	no	no	yes
Col27a1	8.485082694	6.056343735	11.49499475	6.273103051	-0.842113875	4.87E-05	1.084285622	9.12E-09	no	no	no	yes
Col3a1	25.97001149	34.86497015	33.77292747	33.48704675	0.317054042	0.060546913	-0.09450407	0.647532369	no	no	no	no
Col4a1	25.76946291	62.51709144	72.6490931	72.78785919	1.282158582	2.90E-14	0.069027783	0.758428367	yes	no	no	no
Col4a2	24.72752547	45.23611094	48.32758889	52.47166434	0.725614242	6.04E-07	0.089984655	0.5855348	no	no	no	no
Col4a3bp	19.10549017	24.75372542	24.81557654	23.25555037	0.135471037	0.055607704	0.050684677	0.496255767	no	no	no	no
Col5a1	5.066177735	5.62521361	5.554558836	5.025641155	-0.05616186	0.775457709	0.109226184	0.729536211	no	no	no	no
Col5a2	2.769934087	10.54750377	10.04078104	10.01718462	1.837248268	7.87E-18	0.037049342	0.899363715	yes	no	no	no
Col6a1	7.142783842	7.989954588	6.149916133	9.826992249	-0.09700429	0.641061186	-0.257795329	0.373202879	no	no	no	no
Col6a2	2.283480357	3.201657404	2.671186342	4.048950238	0.210985698	0.300316091	-0.139099877	0.619704728	no	no	no	no
Col6a5	0.770233223	4.50003817	4.508377345	4.414997816	2.206566069	2.82E-22	0.136609189	0.736842188	yes	no	no	no
Col8a1	0.531856015	3.425823755	3.013209223	3.847990056	2.346493048	4.38E-22	-0.052335184	0.901757968	yes	no	no	no
Colec10	37.01925501	1.110960718	2.199359801	0.432912099	-5.259922745	3.87E-38	0.934021965	0.074861506	no	no	yes	no
Colec11	54.48808831	16.33329572	17.73564356	9.55436171	-2.003079657	1.20E-50	0.176209871	0.559314213	no	no	yes	no
Colec12	41.06962191	8.686411392	12.37020963	10.6212874	-2.527154991	3.53E-131	0.583325313	0.001049278	no	no	yes	no
Colgalt2	2.794935846	7.635051962	15.06854643	6.327696621	1.159215035	4.81E-20	1.081581413	1.19E-05	yes	no	no	yes
Commd1	14.82291486	18.44739484	17.12307203	19.47384318	0.098170442	0.273352573	-0.112677355	0.272940758	no	no	no	no
Commd10	10.64391616	19.47551096	18.64748566	21.1629318	0.596796914	2.27E-09	0.037789332	0.769223859	no	no	no	no
Commd2	14.16923732	23.57722197	16.12169765	18.05635514	0.644068653	4.20E-09	-0.654552016	4.46E-06	no	no	no	no
Commd3	63.47859133	56.38622373	65.20894219	53.52644753	-0.347673229	0.002302621	0.170988681	0.31601633	no	no	no	no
Commd4	30.58539107	41.75620761	33.33962813	35.71034136	0.201706274	0.112536264	-0.270379742	0.04899573	no	no	no	no
Commd5	38.84722118	43.92775675	38.27103915	36.657658	-0.095609644	0.352378827	-0.144648709	0.269755088	no	no	no	no
Commd6	31.08421925	20.48864366	25.41676011	21.79589859	-0.831399162	5.82E-39	0.335210226	3.28E-05	no	no	no	no
Commd7	10.06723843	8.694782705	8.833724685	8.899854155	-0.510890749	1.15E-10	0.122521076	0.080715646	no	no	no	no
Commd8	15.48722078	17.04623186	18.78578378	17.46206016	-0.157621452	0.015347359	0.239214356	0.000340181	no	no	no	no
Commd9	32.61083219	35.4456015	36.74305725	34.96913365	-0.133218129	0.221441598	0.107116014	0.427742769	no	no	no	no
Comt	110.5991986	38.36564428	43.34889296	40.5961619	-1.76464256	2.49E-85	0.198366854	0.09571856	no	no	yes	no
Comtd1	4.384232836	26.43054859	7.346248881	21.91979201	2.294341269	3.73E-120	-1.745505824	3.87E-51	no	yes	no	no
Copa	38.23468261	34.27594363	47.40721773	35.71914431	-0.312571662	0.000335231	0.415471712	0.000161659	no	no	no	no
Copb1	52.36417937	53.92102323	63.00812821	56.3953145	-0.064570385	0.643699214	0.129657273	0.480982831	no	no	no	no
Copb2	69.41829394	68.75575722	86.35442331	67.72190375	-0.120920439	0.336263953	0.229738972	0.178677841	no	no	no	no
Cope	25.60360478	22.50233532	29.97363203	22.40391234	-0.400779181	1.07E-07	0.435701883	6.86E-07	no	no	no	no
Copg1	46.01026204	53.95190907	64.93416208	54.12071959	0.080119738	0.39223404	0.228281118	0.033651675	no	no	no	no
Copg2	23.71263259	24.61853942	19.41501617	20.6956897	-0.213120017	0.10231919	-0.267807226	0.103317278	no	no	no	no
Coprs	7.770478291	15.88707966	14.74425862	15.14273282	0.727693346	7.37E-07	0.037997688	0.858804287	no	no	no	no
Cops2	38.76656054	55.04127159	44.32631353	55.33455735	0.386877856	0.001185322	-0.395284721	0.002463379	no	no	no	no
Cops3	34.7662406	49.98975937	38.9043263	46.24983435	0.409552766	0.003428565	-0.451528777	0.009405386	no	no	no	no
Cops4	17.75068654	27.15277477	21.88009513	26.18432261	0.422019788	4.41E-08	-0.310506424	0.001504292	no	no	no	no
Cops5	26.58674701	34.06944627	29.23483264	31.05746114	0.202542729	0.070678334	-0.257321216	0.071467719	no	no	no	no
Cops6	47.60617321	47.61273685	45.28480362	47.39623013	-0.18346637	0.011911287	-0.109250983	0.277996114	no	no	no	no
Cops7a	44.17805825	56.7482885	36.55214946	54.7525464	0.155263195	0.027715502	-0.633605424	5.22E-12	no	no	no	no
Cops7b	13.25015192	17.75607463	14.73173895	16.46749864	0.106433359	0.269104342	-0.148576462	0.192589089	no	no	no	no
Cops8	27.15487408	41.84233745	29.3584168	38.85090639	0.374871062	3.68E-06	-0.455653379	1.14E-07	no	no	no	no
Copz1	67.23867321	47.68678445	65.7316479	50.15512856	-0.694050176	1.43E-29	0.451170688	1.35E-07	no	no	no	no
Copz2	23.48086811	5.66608623	20.7735418	9.588184076	-2.398207726	1.07E-74	2.021274763	1.27E-28	no	no	no	yes
Coq10a	16.50262684	7.596541402	9.413336545	7.515294136	-1.417840824	5.33E-72	0.421224724	0.000140004	no	no	yes	no
Coq10b	40.23383802	11.60069442	26.36169248	17.99026699	-2.132900096	1.34E-30	1.300996557	1.21E-13	no	no	no	yes
Coq2	29.32304091	36.22091972	22.61451449	33.58616589	0.064616897	0.41321089	-0.639253201	1.55E-12	no	no	no	no
Coq3	16.58023893	22.162982	13.08576343	18.60440199	0.206552039	0.032464099	-0.740255337	3.28E-11	no	no	no	no
Coq4	10.54769187	20.93533871	8.356876501	17.83841524	0.721811765	7.69E-26	-1.234582244	6.75E-37	no	yes	no	no
Coq5	44.69779003	52.44755383	30.56032266	47.76735154	0.006361465	0.920421858	-0.750354632	1.14E-21	no	no	no	no
Coq6	15.90380592	26.96011823	21.45749619	24.11535645	0.471436647	3.55E-05	-0.237602493	0.086355888	no	no	no	no
Coq7	5.682777966	8.702906029	4.854067122	7.906838101	0.348166043	0.000447049	-0.795372183	8.78E-11	no	no	no	no
Coq9	75.29074981	64.51281647	62.3968565	61.24062239	-0.388712093	1.96E-05	-0.084304551	0.545886674	no	no	no	no
Coro1a	8.235939421	17.14677303	30.21489123	19.06981805	0.741950613	5.34E-09	0.937795262	1.57E-11	no	no	no	no
Coro1b	58.8746291	57.22925366	66.47014457	60.37884868	-0.287532914	4.52E-05	0.245065408	0.007375161	no	no	no	no
Coro1c	7.541828464	21.27955385	14.90207958	20.85994512	1.251869848	1.12E-66	-0.458064948	2.54E-18	yes	no	no	no
Coro7	7.223820724	10.20182997	10.11486079	8.965018505	0.1843787	0.051674817	0.113238887	0.406881558	no	no	no	no
Cotl1	12.73374286	34.79012207	33.96676157	49.58589369	1.153470746	5.14E-27	0.06638871	0.507840014	yes	no	no	no
Cox10	13.91557198	27.14072603	12.00872839	23.52878867	0.677977924	3.23E-26	-1.089623478	2.23E-18	no	yes	no	no
Cox11	15.85719522	19.91837092	17.8227366	19.82903396	0.039731667	0.624804641	-0.055971449	0.689464823	no	no	no	no
Cox14	45.23506689	52.95409118	47.10380031	48.92903157	0.017520996	0.880744843	-0.1664367	0.239813818	no	no	no	no
Cox15	18.17602734	24.62301964	20.23835614	24.49278477	0.204810996	0.000102512	-0.229040901	0.000565197	no	no	no	no
Cox16	12.298119	12.87878834	12.24118858	13.10165323	-0.221024129	0.018170821	0.015530972	0.904484831	no	no	no	no
Cox17	34.26014551	47.90118595	43.74391175	43.51664265	0.397137638	0.017620342	-0.240695164	0.255157645	no	no	no	no
Cox18	19.37848306	14.72601411	9.862869082	16.2790562	-0.740924196	1.34E-15	-0.406183857	0.006128351	no	no	no	no
Cox19	45.9291882	60.38223179	45.35761626	50.25082818	0.14485919	0.084050435	-0.365094166	7.71E-05	no	no	no	no
Cox20	50.43206962	53.29822388	49.60194613	54.62606576	-0.119976293	0.268846962	-0.107540062	0.315134351	no	no	no	no
Cox4i1	126.9875084	107.1813766	125.6553319	116.8611014	0.034794162	0.900416519	-0.25501872	0.448390845	no	no	no	no
Cox5a	62.36214204	66.22970393	62.72879339	69.29411803	0.255605357	0.303514681	-0.43424175	0.155143725	no	no	no	no
Cox5b	85.27349326	78.39968724	82.99740106	83.16271166	0.064714605	0.797026135	-0.306074066	0.31540181	no	no	no	no
Cox6a1	124.1844745	98.48767961	120.1505894	104.7453194	-0.230022858	0.271933526	-0.034152308	0.915279563	no	no	no	no
Cox6a2	0.217384088	6.564151097	2.642577566	2.423043596	4.398135917	1.59E-17	-1.059844569	0.002983885	no	yes	no	no
Cox6b1	83.4325345	77.52921793	82.66572913	83.48194886	0.237785754	0.430869019	-0.444263917	0.221201139	no	no	no	no
Cox6b2	0.95270508	6.397968517	4.639191566	3.657848429	2.247055541	8.16E-15	-0.149577982	0.661174855	yes	no	no	no
Cox6c	66.10496124	61.6993564	62.35008829	65.19813358	0.228944631	0.439849335	-0.5015368	0.15360728	no	no	no	no
Cox7a1	2.834423658	6.450817961	12.34562928	8.140661381	1.090491078	0.000257286	0.83457648	0.004713634	yes	no	no	no
Cox7a2	61.4133152	58.14925179	59.91436009	62.47234249	0.247985675	0.372546444	-0.465083342	0.158739001	no	no	no	no
Cox7a2l	102.3612897	93.01439042	115.4179632	100.1185954	-0.114615719	0.480717949	0.070071931	0.76334248	no	no	no	no
Cox7b	49.8116412	48.77416541	53.32650066	51.73581492	0.242172491	0.347373507	-0.349104327	0.272962269	no	no	no	no
Cox7c	53.97053293	56.74275898	59.34116434	61.00098559	0.343369574	0.216282731	-0.41925971	0.220243623	no	no	no	no
Cox8a	114.9640165	95.71320299	115.6499218	104.5442957	-0.043715162	0.866464906	-0.161232232	0.627457006	no	no	no	no
Cp	82.11536514	17.51961893	76.95705051	25.02521746	-2.503264292	2.67E-33	2.149683415	7.18E-18	no	no	no	yes
Cpb2	93.87446783	63.44885063	90.91582731	64.88070977	-0.613246074	0.000306294	0.361905858	0.105566913	no	no	no	no
Cpd	22.19785939	29.30434625	27.53130314	30.59079659	0.160827119	0.006336652	-0.048050848	0.660272879	no	no	no	no
Cpe	0.731988377	0.874990899	4.369401645	0.947007046	0.125408437	0.820652126	2.058403878	0.000216143	no	no	no	yes
Cpeb2	17.65199901	8.300296976	14.24016422	8.173414941	-1.428128506	1.46E-34	0.926151417	7.20E-14	no	no	yes	no
Cpeb3	7.220692459	7.603046111	10.83833597	8.000443014	-0.292981248	0.023332639	0.684853929	1.15E-05	no	no	no	no
Cpeb4	42.52616766	23.17512234	46.14611255	25.46353987	-1.184957701	1.09E-29	1.099899917	3.75E-18	no	no	no	yes
Cped1	41.49372147	11.33025505	21.60983209	12.24084734	-2.196053806	2.20E-146	1.056332889	3.20E-27	no	no	no	yes
Cpm	3.077494955	9.198884366	27.46661773	8.393187352	1.241796218	8.08E-24	1.703519971	1.07E-21	yes	no	no	yes
Cpn1	57.29108173	24.43681914	46.07236362	32.61337666	-1.478280101	4.33E-99	0.955008736	1.61E-19	no	no	yes	no
Cpn2	137.8092665	34.51215909	72.33045634	36.7794428	-2.301303285	6.40E-130	1.153687015	9.49E-25	no	no	no	yes
Cpne1	12.39833291	18.42985936	18.20753365	17.29702591	0.278500768	4.57E-05	0.071331767	0.480516106	no	no	no	no
Cpne2	6.083999399	2.004992085	2.496191793	2.035058421	-1.958731786	1.65E-44	0.456309151	0.058409934	no	no	yes	no
Cpne3	35.51932592	33.97757262	41.38581658	35.62075949	-0.288500328	0.000348637	0.31177993	3.43E-07	no	no	no	no
Cpne7	0.105926283	5.113448476	0.219111552	9.715823821	5.261256478	1.42E-64	-4.186837125	7.06E-51	no	yes	no	no
Cpne8	3.076821268	2.969051512	8.33558082	3.127086562	-0.331588684	0.001722378	1.531318822	3.36E-14	no	no	no	yes
Cpox	48.22928767	25.99963252	29.65747605	28.76443386	-1.079568661	1.55E-29	0.170228283	0.176336557	no	no	yes	no
Cpped1	32.35312335	25.33793104	23.35023823	22.64730484	-0.641468823	1.22E-48	-0.027274229	0.848791629	no	no	no	no
Cpq	25.84990651	5.897652671	14.4041284	9.981504835	-2.451051215	2.86E-68	1.390748292	3.39E-10	no	no	no	yes
Cps1	163.882659	96.98789073	124.2066302	99.68867334	-0.58243035	0.020111413	-0.03245434	0.931398319	no	no	no	no
Cpsf1	36.50868924	54.16528786	30.99598132	51.03695255	0.31572536	1.77E-07	-0.760028172	7.45E-24	no	no	no	no
Cpsf2	17.97138602	34.77373539	20.02233182	33.24886144	0.726147503	2.09E-26	-0.757468478	1.34E-24	no	no	no	no
Cpsf3	18.08360983	31.42154604	19.30679324	30.20214719	0.652863472	4.01E-08	-0.754563265	2.28E-07	no	no	no	no
Cpsf3l	31.78023117	42.53799884	33.80107586	43.93697492	0.145268674	0.040945186	-0.256926456	0.000895557	no	no	no	no
Cpsf4	19.77851948	35.20238227	22.68972787	34.18650822	0.547930534	5.83E-14	-0.529049271	2.32E-10	no	no	no	no
Cpsf4l	4.761062013	1.844704218	1.579889322	2.084188369	-1.767719739	4.04E-12	-0.005624218	0.986312196	no	no	yes	no
Cpsf6	23.76418315	40.43839958	31.82575369	40.54085335	0.546248249	1.09E-06	-0.316256776	3.47E-05	no	no	no	no
Cpsf7	16.12387527	23.15164975	18.94293862	22.09068834	0.247429311	0.00067796	-0.214500818	0.001180738	no	no	no	no
Cpt1a	90.33138134	54.07833095	66.42890061	58.02026215	-0.924415049	2.70E-13	0.279173581	0.105487099	no	no	no	no
Cpt1b	2.380187617	39.04267293	43.57537793	36.20445888	3.763714999	3.34E-269	0.208595634	0.354301158	yes	no	no	no
Cpt2	95.40675307	51.13142116	65.1926452	58.74498713	-1.148351702	1.93E-66	0.388001099	2.28E-05	no	no	yes	no
Cr1l	13.92501995	12.52128218	14.50413576	11.50104824	-0.432373137	2.53E-18	0.284560348	1.13E-07	no	no	no	no
Crabp2	0.024734763	10.35532616	4.489407178	1.633336825	7.464288373	3.77E-21	-1.101189969	0.004687067	no	yes	no	no
Cradd	16.69543923	6.780882931	6.367877339	5.071058008	-1.604126952	1.38E-81	0.01607463	0.929969097	no	no	yes	no
Cramp1l	10.20372911	15.45710944	11.98183721	13.36881663	0.272183146	0.000742724	-0.239674867	0.008061608	no	no	no	no
Crat	20.63373611	19.46341631	33.4466401	20.79528083	-0.342150454	0.002468437	0.85506815	5.04E-30	no	no	no	no
Crb3	25.5348286	15.01992102	41.07533512	19.37311365	-1.105499573	5.99E-21	1.585332411	1.32E-34	no	no	no	yes
Crbn	20.4866098	19.2495896	21.46089154	19.61873666	-0.36469666	1.14E-05	0.232410173	5.07E-05	no	no	no	no
Crcp	34.9147671	26.46395759	22.60649087	21.81947652	-0.665487535	3.35E-12	-0.158600738	0.278744652	no	no	no	no
Creb1	13.057027	24.36764463	20.80407483	20.91134247	0.614169322	4.32E-14	-0.142527542	0.051524797	no	no	no	no
Creb3	52.79372826	29.5423536	58.14096967	31.06572589	-1.126754758	1.54E-42	1.059964305	6.77E-24	no	no	no	yes
Creb3l2	16.53406584	9.59616397	33.023458	14.68317966	-1.114188194	1.52E-17	1.917455194	5.88E-53	no	no	no	yes
Creb3l3	101.2624773	55.17892629	79.9928943	56.90678108	-1.053146854	1.96E-31	0.500630644	5.73E-07	no	no	yes	no
Crebbp	27.35341101	30.43541374	29.63347245	28.26806808	-0.139873459	0.034968049	0.052572762	0.533880604	no	no	no	no
Crebl2	50.22197586	13.57248523	25.9623342	14.40082122	-2.180756321	0	1.040307837	2.00E-29	no	no	no	yes
Crebrf	23.33163207	9.691548975	21.15067299	8.696660632	-1.608119847	5.32E-58	1.257573248	1.73E-28	no	no	no	yes
Crebzf	27.82353245	31.57411901	32.0216388	31.63865737	-0.08998951	0.280018085	0.088287192	0.38657375	no	no	no	no
Creg1	114.0604604	60.91944077	60.14950998	59.15816647	-1.086238773	4.56E-46	-0.051343508	0.696359114	no	no	yes	no
Creld1	27.44197002	2.861637384	7.767742132	5.536095107	-3.653704727	1.16E-130	1.609618785	7.80E-11	no	no	no	yes
Creld2	73.14252471	33.84769951	45.60187466	40.50070289	-1.339850931	9.38E-15	0.473997036	0.002043647	no	no	yes	no
Crem	14.91648189	4.313172088	8.842032755	6.187675773	-2.114532086	2.07E-80	1.150221878	4.47E-21	no	no	no	yes
Crim1	6.426205253	11.86359588	8.460888849	9.934314682	0.601199784	1.10E-06	-0.368464611	0.089216243	no	no	no	no
Crip1	14.47810889	32.74790702	39.24978933	30.64615283	0.928568434	8.68E-09	0.318158183	0.054376002	no	no	no	no
Crip2	41.76543923	16.45571308	26.63872265	27.42538558	-1.698599171	3.37E-37	0.836879688	9.07E-05	no	no	yes	no
Crip3	4.828676723	0.532040585	0.690291307	0.490754328	-3.409043512	2.33E-37	0.414591573	0.428125358	no	no	yes	no
Cript	38.68494628	33.45322032	38.16239068	34.85086706	-0.43614925	1.61E-05	0.223909286	0.037238292	no	no	no	no
Crk	63.29369502	58.13786824	61.72547554	65.57951286	-0.317739982	4.66E-06	0.075716307	0.361034001	no	no	no	no
Crkl	30.43428953	30.87805777	33.07438487	33.18017276	-0.285269144	2.22E-08	0.19913755	0.004687392	no	no	no	no
Crlf2	3.231610905	2.516243086	5.617820386	2.30302628	-0.7729608	8.98E-05	1.353767605	3.58E-09	no	no	no	yes
Crlf3	9.501590422	21.17487761	12.99404819	19.06262346	0.895480738	2.84E-54	-0.634455436	3.64E-22	no	no	no	no
Crls1	38.96100495	32.20736646	33.77540012	35.24973358	-0.506352793	7.34E-10	0.095118663	0.416210525	no	no	no	no
Crnkl1	10.75645237	10.40617626	10.38919579	10.61560959	-0.310151056	0.000253895	0.080354759	0.498482872	no	no	no	no
Crocc	1.06328374	3.061427692	1.560032938	4.10267642	1.200244082	2.65E-13	-0.830312585	5.10E-05	yes	no	no	no
Crot	80.02049994	33.48027993	61.86486344	42.48461994	-1.45141653	2.67E-59	0.867720767	9.72E-14	no	no	yes	no
Crp	144.120048	45.34828137	132.3935427	44.15276264	-1.902272405	2.82E-108	1.559745169	2.15E-53	no	no	no	yes
Crtap	6.046181504	28.34928318	12.29894334	22.41528527	1.947090385	8.16E-42	-1.140469654	3.47E-27	no	yes	no	no
Crtc1	4.161428601	7.177467562	4.120816747	6.916679421	0.432644846	0.000262872	-0.622808309	6.67E-05	no	no	no	no
Crtc2	13.47485935	9.682614994	9.278177297	8.575943664	-0.825795653	7.23E-17	0.080621322	0.55673641	no	no	no	no
Crtc3	6.318184203	5.747871279	4.801654192	5.65378423	-0.521210205	9.39E-06	-0.06784553	0.705488007	no	no	no	no
Cry1	7.948303911	13.09099811	7.540231067	13.88296976	0.390069481	0.007383908	-0.637617344	1.60E-05	no	no	no	no
Cry2	21.32109474	18.28487483	23.24496865	18.18575866	-0.530519797	4.25E-11	0.453475881	1.73E-08	no	no	no	no
Cryab	2.414206325	1.546788575	3.393187122	1.474899781	-0.963173071	6.10E-07	1.318811431	2.37E-05	no	no	no	yes
Cryba1	1.533376218	3.932434637	3.831539107	2.999546287	0.952673293	0.001640714	0.159867025	0.636323235	no	no	no	no
Crybg3	4.18361047	2.285164174	1.649514765	2.108136328	-1.182517749	5.47E-29	-0.310908681	0.038101047	no	no	yes	no
Cryl1	25.33951975	5.818236162	8.857735667	8.568427158	-2.383524468	3.31E-76	0.654991512	0.000754426	no	no	yes	no
Crym	4.201247587	3.623458495	4.58214919	3.936066665	-0.511528021	0.000739708	0.449077084	0.016712027	no	no	no	no
Cryz	62.26621111	36.7956704	61.34357732	38.12721551	-1.019936117	6.46E-75	0.80278962	6.01E-25	no	no	yes	no
Cryzl1	10.52951079	29.96327598	23.93249327	24.71295371	1.296685451	1.31E-49	-0.291892625	0.014467962	yes	no	no	no
Cs	61.86037023	71.02814644	52.82605302	71.50205321	0.086435644	0.3851523	-0.511711726	8.65E-06	no	no	no	no
Csad	97.54123247	78.4216823	122.2318267	82.61055099	-0.410354361	0.00604897	0.535682366	0.000142378	no	no	no	no
Csde1	46.67353787	50.72202685	49.97009823	51.08490963	0.125521458	0.422402739	-0.229212741	0.236737915	no	no	no	no
Cse1l	26.36418306	65.4341639	34.08279549	66.55997857	1.242757408	9.46E-22	-1.058153702	9.83E-08	no	yes	no	no
Csf1	8.85228027	6.915941593	18.53001968	5.557998756	-0.671470779	0.000180536	1.507776724	4.96E-12	no	no	no	yes
Csf1r	22.17250747	22.58423469	23.52447953	16.78539222	-0.230937301	0.049473419	0.121432854	0.435510975	no	no	no	no
Csf2ra	3.413573031	7.470238535	9.250591426	6.834705902	0.704469985	0.000757305	0.496922892	0.041097368	no	no	no	no
Csf2rb	4.486204576	5.197046518	5.640517199	4.873410163	-0.159275718	0.329175377	0.281487879	0.198319212	no	no	no	no
Csf3r	1.484638324	2.02300991	4.408660429	4.135406716	0.114554527	0.594966404	1.237759937	1.41E-06	no	no	no	yes
Csgalnact2	14.5035353	9.152946023	16.93875032	9.060143048	-0.973311305	1.00E-33	0.991140074	7.69E-20	no	no	no	no
Csk	32.45746258	39.94730406	29.29469185	40.17126272	0.034693776	0.592387117	-0.384783746	5.70E-08	no	no	no	no
Csnk1a1	24.58951825	30.58004998	31.55085553	31.39101795	0.101364563	0.23767025	0.063299321	0.478139092	no	no	no	no
Csnk1d	32.84869851	34.74162536	33.80688047	36.16408364	-0.17796751	5.87E-05	0.019081163	0.760554491	no	no	no	no
Csnk1e	3.812644317	7.311970981	9.025481365	6.733621548	0.633133606	7.59E-09	0.416638329	0.009445982	no	no	no	no
Csnk1g1	4.203956422	8.476941087	7.887050684	8.543680236	0.67286618	4.12E-11	0.037115008	0.785864929	no	no	no	no
Csnk1g2	44.83635193	39.65811812	40.84430703	39.49701302	-0.470538941	5.58E-16	0.12281628	0.039768774	no	no	no	no
Csnk1g3	21.01533821	15.95290651	12.58877878	16.53882144	-0.703096871	2.46E-17	-0.244783096	0.011225083	no	no	no	no
Csnk2a1	61.15187533	61.4764109	54.83276476	59.81765896	-0.136796384	0.111999221	-0.2309789	0.024089006	no	no	no	no
Csnk2a2	11.81843539	18.57782505	10.1420096	19.4293138	0.379385201	2.68E-10	-0.810553397	3.87E-40	no	no	no	no
Csnk2b	41.25676584	44.60516348	38.29219486	44.72154111	0.000777338	0.99599928	-0.311545353	0.060132738	no	no	no	no
Cspp1	12.0504096	14.95793942	14.3375622	13.29016779	0.008712844	0.927010763	0.048961145	0.620487559	no	no	no	no
Csrnp1	9.2809719	2.857013364	12.95808307	5.124665541	-2.126170934	3.12E-30	2.366319458	1.11E-24	no	no	no	yes
Csrnp2	4.861904201	5.364536734	5.013038928	5.705442777	-0.1895513	0.087295871	0.034731901	0.850572923	no	no	no	no
Csrp1	12.99104813	32.25481361	58.14017098	33.72840762	1.092908191	3.64E-18	0.871189439	2.41E-13	yes	no	no	no
Csrp2	32.31123198	40.98919403	35.13718379	29.40112988	0.174660333	0.278122202	-0.240145903	0.235130004	no	no	no	no
Csrp2bp	19.00644919	26.33263434	16.09373184	24.78754188	0.186957218	0.00055581	-0.615117625	8.11E-19	no	no	no	no
Csrp3	41.45266527	0.230414949	2.068324038	0.528666572	-7.48535143	2.70E-161	0.840680172	0.187967898	no	no	yes	no
Cst3	91.37270483	74.92681298	90.92045393	84.33752936	-0.350857317	0.010279495	0.116365268	0.553517866	no	no	no	no
Cstb	48.52729175	41.90564857	69.68793124	52.18921893	-0.457553102	5.29E-07	0.770318673	1.01E-10	no	no	no	no
Cstf1	23.84123195	42.59866964	23.19248857	42.89263459	0.565443849	8.63E-18	-0.811194737	9.47E-25	no	no	no	no
Cstf2	11.76072147	31.93056065	14.72314676	31.7550702	1.187877704	6.01E-81	-1.054999583	3.13E-93	no	yes	no	no
Cstf2t	32.00340089	23.93405824	36.09210374	22.12305194	-0.732265347	8.20E-13	0.697994661	3.66E-10	no	no	no	no
Cstf3	9.086988617	19.84695927	18.07203617	20.93466001	0.830622225	3.93E-18	-0.035880428	0.675222912	no	no	no	no
Ctage5	70.41140093	58.50801412	62.38647991	61.82784543	-0.288519861	0.077044332	-0.081661996	0.723533344	no	no	no	no
Ctbp1	22.35988062	37.48325772	28.28348586	34.66432582	0.532733266	9.68E-20	-0.386891489	3.35E-09	no	no	no	no
Ctbp2	3.611074438	14.99509978	10.21843689	7.236849132	1.766087505	2.54E-103	-0.440203575	9.79E-05	yes	no	no	no
Ctbs	11.56761612	9.730457975	12.7233492	10.8219982	-0.520666729	6.57E-11	0.447778012	4.77E-08	no	no	no	no
Ctc1	5.100156099	22.93262887	12.11902413	20.57776023	1.89529972	1.55E-89	-0.828958235	1.29E-21	yes	no	no	no
Ctcf	26.08203817	39.4348901	26.7025047	38.66349614	0.352991639	1.08E-14	-0.525235862	8.24E-16	no	no	no	no
Ctdnep1	22.87925813	29.87208694	22.08036743	29.4296514	0.06298817	0.293044515	-0.339736493	5.74E-06	no	no	no	no
Ctdp1	10.81312642	24.14122147	10.08525441	23.70118779	0.85892065	1.77E-36	-1.123345633	1.04E-49	no	yes	no	no
Ctdsp1	75.53035248	44.76891553	62.93183912	47.19772722	-1.022005446	1.58E-123	0.54953287	5.20E-24	no	no	yes	no
Ctdsp2	33.45690753	33.84898824	45.38942974	32.00342916	-0.252493771	5.55E-05	0.4826015	4.75E-12	no	no	no	no
Ctdspl	8.27610164	15.79589766	17.86233634	12.84760587	0.624027453	1.51E-10	0.282501631	0.039580502	no	no	no	no
Ctdspl2	7.330201714	16.66041545	11.84075103	15.47263158	0.904730303	1.05E-31	-0.415758601	5.84E-17	no	no	no	no
Ctf1	6.842321808	1.676444699	4.791060876	3.472043303	-2.417040072	6.32E-36	1.6661926	1.50E-10	no	no	no	yes
Ctgf	6.742474893	12.35872209	16.83924864	13.38086253	0.535064737	0.021902032	0.51694404	0.106125895	no	no	no	no
Cth	62.75501697	36.50719577	35.54702921	37.44815925	-0.94350991	4.40E-14	-0.074485942	0.700810664	no	no	no	no
Ctif	19.13995273	4.084918556	4.416214141	4.791368484	-2.606567056	2.66E-86	0.285269035	0.133877993	no	no	yes	no
Ctla2a	8.80381858	12.86670592	17.62540502	15.1694927	0.274247415	0.004830282	0.518650799	2.24E-05	no	no	no	no
Ctla2b	7.285139385	4.593392799	8.164164009	5.466264804	-1.01916756	1.01E-10	0.953219033	0.000230199	no	no	yes	no
Ctnna1	46.69416803	43.21019538	64.01206454	52.88671804	-0.28975045	0.000181178	0.546770905	1.34E-07	no	no	no	no
Ctnnal1	3.247854479	16.68817643	9.990479689	16.80343728	2.086585919	1.29E-141	-0.673930254	3.09E-16	yes	no	no	no
Ctnnb1	101.1759736	95.17718463	122.7968194	103.4259912	-0.082764163	0.598102208	0.145284031	0.484420738	no	no	no	no
Ctnnbip1	8.79871582	17.27492854	24.9308171	17.29153018	0.623255577	6.19E-09	0.673602903	1.49E-05	no	no	no	no
Ctnnbl1	11.85752734	20.9532192	13.01154048	17.81318482	0.621794832	7.66E-05	-0.625208865	0.00026626	no	no	no	no
Ctnnd1	54.06982032	48.75193515	64.90697809	49.01595354	-0.361165258	5.04E-15	0.415444093	2.68E-11	no	no	no	no
Ctns	18.08456628	10.32521775	19.4348551	11.22308497	-1.112638065	1.41E-53	1.019302602	4.01E-35	no	no	no	yes
Ctps	6.09066687	50.7147715	17.7801078	47.74180463	2.932680095	3.64E-119	-1.514067238	7.28E-11	no	yes	no	no
Ctps2	3.956178466	19.39627183	23.32228243	20.03597968	2.17595317	2.68E-55	0.230632289	0.173420141	yes	no	no	no
Ctr9	20.80388746	42.03676933	40.09767446	45.13940559	0.789230933	8.95E-29	-0.028832807	0.81040967	no	no	no	no
Ctrl	3.12851049	7.805519465	2.397509217	8.745025458	0.978012301	8.99E-09	-1.481862746	1.46E-12	no	yes	no	no
Ctsa	41.64432264	39.33573836	66.74840281	42.04477622	-0.259852733	0.001112886	0.708719638	7.25E-06	no	no	no	no
Ctsb	75.67518451	72.69072905	91.06790925	80.13579139	0.182785987	0.447432291	-0.121060632	0.714003573	no	no	no	no
Ctsc	41.38736287	13.69293936	19.90735612	19.54720332	-1.895120121	1.54E-62	0.63815269	2.79E-07	no	no	yes	no
Ctsd	127.2687568	120.6774172	154.5031398	135.5266173	0.144004728	0.548122286	-0.076406314	0.821733494	no	no	no	no
Ctse	40.65858533	28.74814135	33.41496091	27.12834416	-0.702633488	7.08E-09	0.214227386	0.167137288	no	no	no	no
Ctsf	17.10188298	13.17991769	12.38503037	14.76487995	-0.698675661	2.22E-07	0.03127431	0.892946039	no	no	no	no
Ctsg	0	3.464918182	4.262127899	4.503769731	7.223483046	2.70E-10	0.476592464	0.391598302	yes	no	no	no
Ctsh	73.1355109	23.48271304	54.4377353	31.0565108	-1.868386373	2.68E-74	1.231082888	4.60E-18	no	no	no	yes
Ctsk	1.733642621	4.209263782	4.613916393	3.303909325	0.919364369	4.23E-05	0.292918307	0.251761247	no	no	no	no
Ctsl	77.50638042	69.77297965	85.18406147	75.70631029	-0.054460366	0.788912288	-0.027577934	0.923731505	no	no	no	no
Ctso	35.15060655	4.826553352	11.11834468	7.457594923	-3.174682835	2.13E-134	1.304259742	7.92E-10	no	no	no	yes
Ctss	23.03894526	42.8161724	53.52350634	49.13728115	0.868814828	1.34E-06	0.163627159	0.51518674	no	no	no	no
Ctsw	3.267786156	4.924240366	6.677565242	5.221792479	0.285853729	0.144399988	0.530389759	0.00442121	no	no	no	no
Ctsz	105.9211279	85.70784886	85.59776647	94.54940258	-0.379250409	0.002791041	-0.138684879	0.449788018	no	no	no	no
Cttn	35.32314365	41.9123504	53.90652997	43.35379273	0.035399164	0.675087335	0.394540992	0.000122752	no	no	no	no
Cttnbp2nl	3.511432472	4.030453269	6.068207074	4.252755903	-0.148775979	0.196945506	0.734793644	1.08E-06	no	no	no	no
Ctu1	5.905785296	13.6435867	6.162829182	11.05193041	0.851541217	1.63E-14	-0.968985308	1.97E-11	no	no	no	no
Ctu2	8.704576455	14.12018218	6.626909916	13.61728637	0.385466627	0.000140759	-0.973458987	1.60E-15	no	no	no	no
Ctxn1	0.547896684	1.158505458	3.163130872	0.812204204	0.754718197	0.018973768	1.415809106	0.000394296	no	no	no	yes
Cubn	0.138697523	2.299479739	15.09657772	3.386822068	3.234567	5.03E-17	2.868033502	1.50E-10	yes	no	no	yes
Cuedc2	14.40108728	33.18466342	27.59078056	29.20909266	0.971266715	2.24E-35	-0.246310227	0.009303326	no	no	no	no
Cul1	40.22372295	51.67935298	45.61308501	53.70107172	0.247498245	0.029260629	-0.265032379	0.059683384	no	no	no	no
Cul2	22.4920079	31.71818641	20.54045652	34.15987147	0.331435932	0.004065211	-0.662198383	1.25E-09	no	no	no	no
Cul3	38.48304667	48.64802727	44.78522826	49.16769913	0.214825752	0.102262926	-0.183171794	0.212014775	no	no	no	no
Cul4a	56.35518014	50.66197986	51.24981091	53.47097605	-0.335301682	9.78E-07	-0.016052258	0.891469758	no	no	no	no
Cul4b	16.36826431	30.92941053	23.33347135	26.52973133	0.689475387	3.18E-12	-0.376995911	0.00043204	no	no	no	no
Cul5	15.83445962	22.42176982	17.28960293	22.86544689	0.241408488	5.06E-05	-0.310767064	4.49E-08	no	no	no	no
Cul7	5.600273823	30.55773763	39.51510999	28.17962786	2.170449641	1.22E-61	0.440411501	0.000244018	yes	no	no	no
Cul9	4.47922	1.395383376	1.628886485	2.048045145	-2.021427548	4.74E-34	0.393952141	0.114309274	no	no	yes	no
Cuta	49.28365359	37.79708784	39.15778224	39.83082807	-0.688195052	4.73E-16	0.143515456	0.197141058	no	no	no	no
Cutal	48.14251079	3.624860972	27.53224357	10.97259331	-4.081328015	3.11E-105	2.989030134	3.58E-35	no	no	no	yes
Cutc	19.2336606	13.55800992	12.38012321	11.88952847	-0.72389951	1.82E-11	-0.112292148	0.515512479	no	no	no	no
Cux1	6.090979695	6.743256349	7.857405817	7.038479336	-0.153091541	0.066758802	0.324758573	0.001935517	no	no	no	no
Cux2	11.51374274	6.29697645	9.70614261	6.749845404	-1.24049182	0.03258414	0.79756426	5.81E-07	no	no	no	no
Cwc15	34.74667996	39.71367754	34.0798219	40.30757036	0.088422605	0.562160546	-0.310384837	0.09061555	no	no	no	no
Cwc22	3.721525951	9.878646762	4.931220237	8.37224321	1.136582599	4.21E-96	-0.925689154	2.86E-57	yes	no	no	no
Cwc25	8.208119674	7.001108309	9.494275283	7.505921907	-0.51384816	1.33E-16	0.543845886	3.81E-16	no	no	no	no
Cwc27	5.659574026	12.5067715	6.820105915	9.297118715	0.858265827	1.80E-17	-0.796023711	5.83E-09	no	no	no	no
Cwf19l1	21.79598785	14.5815787	7.946353972	11.86106071	-0.885475808	7.35E-25	-0.742826906	4.06E-12	no	no	no	no
Cwf19l2	8.104124408	10.33960175	7.961503912	9.540098111	0.090564384	0.19379875	-0.318253103	9.08E-07	no	no	no	no
Cx3cl1	0.471082631	3.035085228	6.559466605	3.914823332	2.229806646	7.55E-19	1.305730646	7.57E-05	yes	no	no	yes
Cx3cr1	5.324284109	2.899762254	9.882324044	3.303643973	-1.208999899	4.97E-09	1.818457992	6.81E-09	no	no	no	yes
Cxadr	47.08443894	45.13039261	72.69479598	51.5979542	-0.272739754	0.000466908	0.702837997	3.42E-22	no	no	no	no
Cxcl1	26.63575405	9.796038944	43.20470289	14.92396962	-1.815910998	3.25E-10	2.199709234	5.98E-11	no	no	no	yes
Cxcl10	2.353306895	8.647814277	46.31379569	15.5600524	1.587844827	3.66E-06	2.393615788	8.43E-14	yes	no	no	yes
Cxcl11	3.973465729	0.824234647	1.725296238	1.702572086	-2.600165263	1.31E-18	1.127516058	0.005221451	no	no	no	yes
Cxcl12	80.95979767	32.87415351	58.58564309	39.7619965	-1.593047486	1.12E-107	0.914755856	1.25E-26	no	no	yes	no
Cxcl16	7.442486801	8.233272452	16.12748061	11.94966384	-0.253720206	0.089088108	1.133030816	4.19E-08	no	no	no	yes
Cxcl9	4.004789325	1.356149274	4.068256123	4.915775468	-1.892268698	1.28E-18	1.669153142	1.79E-10	no	no	no	yes
Cxcr2	6.306620938	4.843835453	6.892848159	5.675647664	-0.548567737	1.07E-06	0.434234664	0.003271126	no	no	no	no
Cxcr4	1.128672417	10.36953564	13.974331	14.81479151	2.808275659	9.54E-65	0.587868847	0.000760434	yes	no	no	no
Cxcr6	7.306383941	3.932305577	5.532022536	4.102242916	-1.239990749	1.46E-18	0.631692092	0.00031986	no	no	yes	no
Cxx1b	3.007069989	1.329063375	2.982389119	1.586056261	-1.59581347	3.99E-09	1.31466056	6.83E-05	no	no	no	yes
Cxxc1	32.82378086	25.65755784	23.82732285	25.23209919	-0.68843227	8.08E-21	0.01609097	0.868354029	no	no	no	no
Cxxc5	43.43453301	38.93841202	49.95378611	48.78215577	-0.431441	3.70E-11	0.424548663	8.75E-07	no	no	no	no
Cyb561	0.81722142	4.83472545	4.763217568	8.211685244	2.13227196	6.48E-17	0.180545301	0.680598688	yes	no	no	no
Cyb561a3	21.62972534	9.651423718	19.63984255	11.81084674	-1.456082672	1.82E-64	1.125400224	1.84E-21	no	no	no	yes
Cyb561d1	5.489559543	3.823585498	3.961101621	2.734638203	-0.884088138	3.21E-15	0.209073354	0.152948341	no	no	no	no
Cyb561d2	10.39827956	13.62363909	14.80441997	13.69189276	0.086689186	0.37369982	0.236213083	0.051832343	no	no	no	no
Cyb5b	128.6339904	62.03533497	65.96641628	74.54051659	-1.254638428	2.46E-66	0.072867542	0.539338638	no	no	yes	no
Cyb5d1	30.17554784	18.10372247	17.80593543	16.47805965	-1.053018755	9.80E-39	0.085875755	0.499203671	no	no	yes	no
Cyb5d2	21.17032581	7.473044974	9.822079907	8.437336405	-1.805863788	1.46E-112	0.515469728	4.67E-08	no	no	yes	no
Cyb5r1	5.223911703	17.56276037	6.421698381	14.96362859	1.457180813	3.35E-61	-1.343296429	6.94E-40	no	yes	no	no
Cyb5r3	71.19838898	37.1351145	54.80537907	40.1891566	-1.129631793	1.04E-44	0.538660022	2.93E-08	no	no	yes	no
Cyb5r4	18.93452666	19.40439625	20.2010857	19.15132107	-0.180927979	0.00729161	0.061544666	0.528834272	no	no	no	no
Cyb5rl	6.854799099	4.62735027	2.959540686	4.513916588	-0.926667487	5.02E-25	-0.479709053	4.66E-05	no	no	no	no
Cyba	2.147735455	16.24961039	19.5685354	17.11559972	2.826432165	9.52E-85	0.199193942	0.232359801	yes	no	no	no
Cybb	6.716506199	15.56031573	19.59860259	15.83326059	0.933378753	2.43E-18	0.434298143	0.002099293	no	no	no	no
Cybrd1	0.32635331	2.156227303	5.547932824	1.108211891	2.261042596	7.84E-33	1.484790917	7.56E-12	yes	no	no	yes
Cyc1	90.18637505	83.93850349	76.75533731	84.24677635	-0.074791317	0.656682722	-0.367310853	0.07897658	no	no	no	no
Cycs	46.43896886	45.23575204	44.60190092	51.04661156	0.045818448	0.821292468	-0.299846297	0.177832869	no	no	no	no
Cyfip1	13.47460644	15.88071425	12.88129765	13.6399927	-0.02936588	0.688248438	-0.229288621	0.012383046	no	no	no	no
Cyfip2	0.581412105	3.339314616	3.829313364	10.19473379	2.11982082	1.00E-40	0.418758135	0.101851986	yes	no	no	no
Cygb	5.290296669	6.377550946	8.322198474	6.224398254	-0.078976021	0.660967087	0.500492429	0.084127791	no	no	no	no
Cyhr1	25.52622985	22.2446781	23.9705403	21.26561812	-0.519039421	2.96E-22	0.22295027	0.002793884	no	no	no	no
Cyld	12.12839012	7.322184694	11.04984115	6.181469632	-1.027812343	1.60E-77	0.702981521	1.16E-18	no	no	yes	no
Cyp17a1	7.994266579	5.941355637	10.23273383	3.387951712	-0.786901933	0.056230029	0.918548552	0.000500253	no	no	no	no
Cyp1a2	143.6053997	3.121966916	8.746665377	4.617620136	-5.749793155	1.63E-26	1.348350129	0.026294277	no	no	yes	no
Cyp1b1	0.506798412	2.570551369	3.286259463	2.885278207	1.993271806	8.87E-21	0.46990745	0.128022561	yes	no	no	no
Cyp20a1	17.18290669	33.73864925	20.42726156	31.67257132	0.786498999	1.44E-15	-0.713132463	2.27E-08	no	no	no	no
Cyp21a1	3.225901557	0.490735236	7.932908804	1.864541095	-2.84398919	1.07E-10	2.251817212	4.78E-07	no	no	no	yes
Cyp26a1	26.73796277	0.573919593	1.829783747	1.748977311	-5.854952278	4.65E-55	0.397038982	0.395140515	no	no	yes	no
Cyp26b1	8.412135039	0.327515296	0.134051357	0.340323367	-4.875919995	9.42E-25	-0.998120172	0.056692913	no	no	yes	no
Cyp27a1	154.0359452	24.84685263	41.81196156	25.77003084	-2.959521261	1.55E-189	0.870824265	1.83E-06	no	no	yes	no
Cyp2a12	121.2616072	4.238090806	41.86950906	10.65238672	-5.007306665	2.28E-16	2.693729055	1.25E-05	no	no	no	yes
Cyp2a22	38.36331472	0.722074469	6.413484628	1.379661364	-5.765691387	2.19E-16	2.500834171	9.19E-05	no	no	no	yes
Cyp2a4	49.89064474	0.196885851	1.134768367	0.705649534	-7.461788053	4.82E-15	1.806154928	0.010827059	no	no	yes	no
Cyp2a5	84.60528748	1.715236547	9.437266342	3.050018529	-5.563119937	3.97E-16	1.759938726	0.010593432	no	no	yes	no
Cyp2b10	30.22884251	1.05515833	2.27228911	0.257116948	-4.782436072	1.29E-11	-0.043838669	0.95757209	no	no	yes	no
Cyp2b13	54.36372143	0.292893642	0.742392445	0.609013799	-7.321738061	8.85E-19	1.312410152	0.009767672	no	no	no	yes
Cyp2b9	90.0752235	1.467997082	2.228779702	1.18354125	-5.778517195	3.35E-13	0.477767637	0.473056566	no	no	yes	no
Cyp2c29	131.4565069	9.382794244	36.02349311	7.905283748	-3.944384125	1.11E-11	1.59034875	0.010719769	no	no	yes	no
Cyp2c37	46.1082457	2.209956412	7.713119035	1.273021037	-4.583027026	2.77E-13	1.505744422	0.02362434	no	no	yes	no
Cyp2c38	52.09375552	2.647368602	7.851125492	2.207745141	-4.412878481	1.05E-11	1.2331293	0.077915814	no	no	yes	no
Cyp2c39	102.5037976	6.625141678	15.06631302	5.686390151	-4.104520735	2.14E-14	1.010194199	0.110443012	no	no	yes	no
Cyp2c40	35.55479049	0.699225932	3.115397506	0.813743425	-5.877049743	6.15E-36	2.042694744	6.85E-07	no	no	no	yes
Cyp2c44	95.06048054	8.509461438	35.60563444	20.76722178	-3.827324411	2.06E-110	2.160205385	4.13E-21	no	no	no	yes
Cyp2c50	72.10752046	1.740380806	4.996159775	1.774728867	-4.784625886	1.39E-10	1.209713826	0.087395114	no	no	yes	no
Cyp2c54	77.48751753	1.185163793	3.333333705	1.260772077	-4.936343252	4.12E-09	1.025706717	0.178619329	no	no	yes	no
Cyp2c67	66.87106645	10.52801712	21.05808297	10.53298976	-3.024021522	3.08E-75	1.130120279	5.08E-17	no	no	no	yes
Cyp2c68	61.47905083	30.61756493	51.32703231	30.38759997	-1.219977126	1.69E-40	0.758955062	3.12E-14	no	no	yes	no
Cyp2c69	27.70508003	0.313241433	0.634607916	0.329673559	-6.55049607	9.64E-33	0.95978608	0.038652286	no	no	yes	no
Cyp2c70	135.5428776	16.02209139	70.06159154	38.05912195	-3.351816362	5.78E-36	2.106369442	4.76E-11	no	no	no	yes
Cyp2d10	141.684614	15.05485785	45.36038021	12.42612596	-3.58290508	3.06E-84	1.682563367	7.21E-15	no	no	no	yes
Cyp2d22	134.7217555	20.98856732	46.89068032	18.13574746	-3.024249856	1.29E-179	1.281156876	5.83E-27	no	no	no	yes
Cyp2d26	176.2712928	48.75431383	109.4254519	55.49195305	-2.120881791	2.68E-77	1.207547713	2.65E-18	no	no	no	yes
Cyp2d40	35.11133914	0.252176806	0.885953657	0.305742969	-7.349407976	4.01E-119	0.62349075	0.296015808	no	no	yes	no
Cyp2d9	110.0233147	6.754003482	21.87423418	10.61610454	-4.274458545	8.07E-21	1.624805461	0.000585925	no	no	no	yes
Cyp2e1	198.9578649	13.08478784	30.73378301	17.69995666	-4.109846418	9.22E-17	1.093243253	0.056585138	no	no	yes	no
Cyp2f2	158.7382462	2.908077367	30.24813578	13.27617473	-5.83837815	2.07E-21	2.654676798	2.58E-05	no	no	no	yes
Cyp2g1	7.440569759	0.032898096	0.838776131	0.070083236	-7.542634751	3.63E-32	3.189447332	1.36E-06	no	no	no	yes
Cyp2j5	106.893432	2.328694518	10.52937998	5.512825954	-5.544998455	4.23E-21	1.678147134	0.009445541	no	no	no	yes
Cyp2j6	32.33458469	1.438722229	7.596329449	2.000591922	-4.747235286	5.78E-41	2.17015735	2.42E-05	no	no	no	yes
Cyp2j9	14.08525332	0.236363471	0.708582024	0.256767448	-6.023277653	3.19E-42	1.303282556	0.03912074	no	no	yes	no
Cyp2r1	25.57906289	0.550826811	0.807913643	0.965547775	-5.809345757	3.34E-111	0.635028949	0.18537764	no	no	yes	no
Cyp2s1	0.21351821	3.743684587	5.223965305	2.26154892	3.641678105	5.22E-41	0.625418776	0.032539528	yes	no	no	no
Cyp2u1	56.9209289	1.169430069	2.764637332	3.293328332	-5.89862315	5.13E-118	1.303219784	0.000137086	no	no	no	yes
Cyp39a1	16.74530811	25.32344119	28.68982572	10.63337796	0.388666749	0.008775033	0.213853254	0.211690028	no	no	no	no
Cyp3a11	152.9686001	28.70428135	85.92748922	38.03945851	-2.559267713	1.27E-13	1.417553356	0.000542994	no	no	no	yes
Cyp3a13	32.66029691	16.85734594	27.82840418	14.44763672	-1.248594655	4.48E-26	0.801855536	1.35E-15	no	no	yes	no
Cyp3a16	18.26701896	0.907265876	15.11817734	1.005121509	-4.43906034	1.83E-08	3.56910527	2.21E-10	no	no	no	yes
Cyp3a25	122.7606317	12.4021777	33.63901029	13.26838328	-3.575436632	3.01E-23	1.401691002	0.001470293	no	no	no	yes
Cyp3a44	20.28696062	0.956695338	13.87907146	1.370072498	-4.477312048	1.82E-11	2.334449537	5.84E-10	no	no	no	yes
Cyp3a59	46.25393943	2.37009368	7.537043792	2.915962573	-4.508766478	5.02E-31	1.576947802	0.000656984	no	no	no	yes
Cyp4a10	48.95766497	1.723423817	1.183896989	0.832263312	-4.891876266	7.87E-16	0.540816707	0.271116187	no	no	yes	no
Cyp4a12a	52.31327488	4.087296387	45.05539579	15.77148428	-3.880723719	7.14E-19	3.479473395	1.20E-76	no	no	no	yes
Cyp4a12b	5.35999103	8.413854109	25.71038317	18.85998075	0.284218949	0.656517991	1.698486846	2.63E-14	no	no	no	yes
Cyp4a14	56.62796698	3.295581386	15.45776461	0.659630463	-4.081379068	7.97E-07	0.830727405	0.248107112	no	no	yes	no
Cyp4a32	27.62111469	0.293985821	0.413027889	0.395706492	-6.622815245	1.38E-26	0.490002376	0.52323179	no	no	yes	no
Cyp4b1	9.015514797	1.551068324	2.475432979	1.599870002	-2.859931838	1.09E-71	0.818348014	0.008569581	no	no	yes	no
Cyp4f13	61.60109353	11.48458605	28.95978885	15.76669507	-2.732642872	4.85E-159	1.444040511	6.94E-21	no	no	no	yes
Cyp4f14	125.4611578	1.789302442	8.374256527	5.054643591	-4.822695751	4.94E-09	1.60832487	0.022108315	no	no	yes	no
Cyp4f15	85.86976531	1.580191992	8.42086431	1.511398276	-4.741802399	6.49E-12	1.959227812	0.001377207	no	no	no	yes
Cyp4f16	3.790928611	2.470044392	6.168096928	4.432191894	-0.860533509	2.17E-07	1.382789418	3.79E-10	no	no	no	yes
Cyp4f17	15.57974468	1.628688901	5.700119972	2.321928718	-3.618299387	1.80E-78	1.951358189	1.38E-14	no	no	no	yes
Cyp4v3	103.8457833	16.96500662	39.66531499	22.76094376	-2.892055548	6.15E-131	1.296463609	1.32E-20	no	no	no	yes
Cyp51	60.09299818	24.29459599	47.26187154	34.54137266	-1.575977959	8.32E-39	1.017992212	1.39E-11	no	no	no	yes
Cyp7a1	66.8159416	5.301795981	42.45987481	2.570574553	-3.941004195	6.62E-38	2.969115232	2.55E-21	no	no	no	yes
Cyp7b1	73.67305624	1.062640168	1.976932477	2.229399386	-6.383337317	1.96E-104	0.940695302	0.013794924	no	no	yes	no
Cyp8b1	126.8433015	3.767460158	24.26469574	4.787385677	-4.703262391	4.34E-15	2.28384055	0.000114885	no	no	no	yes
Cyr61	13.5100505	5.686859238	34.84165684	9.73608644	-1.560332571	3.01E-14	2.585407894	2.94E-15	no	no	no	yes
Cys1	6.163742128	7.334258689	5.399903337	7.045672852	-0.099436309	0.539513783	-0.268484136	0.378862934	no	no	no	no
Cystm1	9.550373165	13.67825033	35.95440872	19.97527609	0.155562491	0.35420397	1.536229742	6.47E-19	no	no	no	yes
Cyth1	30.01377701	15.60786506	19.67202727	14.09995073	-1.254723162	1.83E-34	0.44592326	0.0001647	no	no	yes	no
Cyth2	12.43429349	12.04575218	16.86744322	11.53018318	-0.321666015	2.82E-06	0.5613583	8.43E-14	no	no	no	no
Cyth3	6.853674041	19.29954311	16.23706616	14.62984486	1.176217839	6.02E-52	-0.146400071	0.085997615	yes	no	no	no
Cyth4	2.516188381	6.810857126	7.927973927	6.600369838	1.093198404	1.79E-18	0.371521075	0.016435547	yes	no	no	no
Cyyr1	6.330931832	3.938579654	3.527881328	3.241113857	-1.002001715	1.91E-09	-0.029037136	0.906626228	no	no	yes	no
D030056L22Rik	12.23563328	34.41969899	21.20899376	37.0008804	1.213040125	2.24E-73	-0.618065176	5.81E-13	yes	no	no	no
D10Jhu81e	78.86352407	61.16998032	64.73093211	63.63344263	-0.523657332	2.57E-06	0.041844654	0.822449833	no	no	no	no
D10Wsu102e	17.42688547	45.99443742	30.57559241	46.79684416	1.146290741	5.03E-63	-0.528952172	1.37E-11	yes	no	no	no
D11Wsu47e	6.066151078	13.03971049	9.284427161	12.38666309	0.794244846	1.27E-24	-0.359246096	0.000617093	no	no	no	no
D130040H23Rik	1.2434476	2.204117908	6.65189753	2.524079982	0.512692723	0.019069827	1.660443342	6.41E-09	no	no	no	yes
D130043K22Rik	7.663905319	2.481978173	5.690438925	3.987897852	-1.918648262	1.06E-21	1.30308653	5.32E-17	no	no	no	yes
D15Ertd621e	45.87352318	52.1006026	48.21495077	46.72980938	0.013701488	0.882856444	-0.133704477	0.198960171	no	no	no	no
D16Ertd472e	10.74562441	8.307575207	9.119110188	5.397374959	-0.696195295	2.88E-10	0.272558646	0.143425828	no	no	no	no
D17H6S53E	27.97163542	13.60600269	21.92623939	12.70976324	-1.425437311	5.89E-27	0.843494561	5.13E-11	no	no	yes	no
D17Wsu92e	95.62176074	50.96093379	56.47088074	55.79907435	-1.148588529	8.71E-75	0.1684418	0.120282618	no	no	yes	no
D19Bwg1357e	10.80039435	27.0344227	9.90183484	26.33012828	1.153078688	6.86E-50	-1.460820464	3.12E-66	no	yes	no	no
D1Ertd622e	10.21019846	14.29802759	9.325361786	6.851543823	0.184043259	0.066525583	-0.511769242	3.86E-06	no	no	no	no
D230025D16Rik	40.18692993	25.01261253	42.85602419	26.36396842	-0.985149138	7.78E-18	0.871937988	1.49E-12	no	no	no	no
D2Wsu81e	11.60968076	31.22339618	11.91050565	28.01052259	1.190245337	3.03E-30	-1.333729713	7.09E-36	no	yes	no	no
D2hgdh	16.07487283	9.1007073	9.167868217	7.492473013	-1.113402886	1.15E-45	0.129081343	0.302842588	no	no	yes	no
D3Ertd254e	8.190482385	9.066167215	8.824273372	7.827216227	-0.153779872	0.144490778	0.06577726	0.546904398	no	no	no	no
D3Ertd751e	3.760508557	6.116397248	4.395048334	5.580535177	0.377213161	0.018712205	-0.325831012	0.141322355	no	no	no	no
D430042O09Rik	11.36043711	9.443274444	10.84924949	7.93725682	-0.597092362	1.50E-11	0.325124435	0.001353518	no	no	no	no
D5Ertd579e	38.65466375	24.9320472	32.57196288	24.69535369	-0.95045967	5.31E-61	0.496045162	1.67E-14	no	no	no	no
D630039A03Rik	17.82136837	2.027325102	4.798591954	0.952545222	-3.484441442	8.52E-58	1.362776491	0.000156615	no	no	no	yes
D630045J12Rik	5.196708091	7.312901166	2.694055788	6.997017239	0.117593824	0.538929664	-1.267206771	4.35E-16	no	yes	no	no
D6Wsu163e	5.230282326	7.080443439	6.628146662	6.177942983	0.169758052	0.071684647	-0.003505807	0.983719819	no	no	no	no
D830031N03Rik	7.379665838	14.39073886	6.429262898	12.65715286	0.648920905	3.00E-13	-1.040256882	5.03E-17	no	yes	no	no
D8Ertd738e	75.27237935	57.36780002	69.1181086	57.25485957	-0.5904324	3.85E-12	0.24172282	0.039368105	no	no	no	no
D8Ertd82e	0.492507712	3.797709827	2.143709219	2.305295504	2.566127908	1.03E-59	-0.661577658	0.002009319	yes	no	no	no
D930015E06Rik	14.70356754	30.56885718	21.45750848	27.11210995	0.824857025	2.28E-23	-0.465980504	1.77E-06	no	no	no	no
Daam1	39.82439095	28.07002279	33.61446148	31.39665662	-0.778879132	7.06E-35	0.336604314	5.02E-06	no	no	no	no
Dab1	1.55381667	0.764054962	6.282934246	0.798921381	-1.328000623	8.91E-06	2.896809076	6.09E-13	no	no	no	yes
Dab2	10.21484478	6.680497305	18.54376645	6.50043363	-0.917785241	1.57E-19	1.580443386	5.07E-24	no	no	no	yes
Dab2ip	8.104747347	14.3764659	14.44628135	15.66255833	0.486312874	1.50E-06	0.147588268	0.192624655	no	no	no	no
Dact2	15.3475459	23.17277493	25.04454863	19.33872379	0.297639158	0.041796767	0.217056952	0.164533247	no	no	no	no
Dad1	13.27265378	12.59094741	14.938266	13.15726232	-0.223257387	0.009301021	0.174285312	0.192469784	no	no	no	no
Dag1	62.00063789	58.31476449	73.37627963	67.64959142	-0.300991695	1.44E-05	0.33434302	0.000127498	no	no	no	no
Daglb	12.30403952	6.926932484	5.574257556	7.489161626	-1.140467482	8.16E-38	-0.197625305	0.06940431	no	no	yes	no
Dak	58.50755318	50.96838996	40.95048923	46.75575748	-0.316275666	0.013982805	-0.397491321	0.026995587	no	no	no	no
Dalrd3	34.59455155	24.49237338	22.34868557	26.02144531	-0.795083838	1.18E-21	-0.05094063	0.709618921	no	no	no	no
Dand5	3.83383191	1.673628408	3.782968745	1.767763065	-1.465065128	5.10E-17	1.204609899	1.77E-09	no	no	no	yes
Dao	0	6.39663658	3.250187974	1.512009322	8.72988831	3.33E-16	-0.713012003	0.142094571	yes	no	no	no
Dap	102.518798	59.46803712	88.18081615	76.72440547	-0.99505225	5.60E-37	0.561764875	4.13E-10	no	no	no	no
Dap3	11.35573825	20.49361665	15.91578769	20.02551915	0.698152577	3.02E-11	-0.380584308	0.001176204	no	no	no	no
Dapk1	43.0087554	22.60150562	32.43721629	26.09421132	-1.232285753	7.14E-33	0.629902506	2.92E-14	no	no	yes	no
Dapk2	10.69511673	3.717921909	8.770480344	6.152364939	-1.870590747	2.91E-19	1.376292123	6.72E-08	no	no	no	yes
Dapk3	16.11832278	14.66740948	17.14536808	14.24854085	-0.437568691	6.25E-06	0.317770384	0.00076505	no	no	no	no
Dapp1	1.361454193	11.47353551	18.67896536	11.86871798	2.771601524	1.68E-116	0.798057017	8.92E-12	yes	no	no	no
Dars	33.56673782	42.77864226	32.36433105	43.15312661	0.243839979	0.03380632	-0.484710203	0.000605469	no	no	no	no
Dars2	14.63971936	30.50882583	14.39793019	26.4104086	0.877330173	2.61E-22	-1.073795306	1.14E-23	no	yes	no	no
Daxx	12.7420667	22.10802402	16.84581989	21.9462661	0.467575431	2.52E-08	-0.286369553	8.22E-05	no	no	no	no
Dazap1	23.95211014	43.64212255	31.40867149	39.1242192	0.633300728	1.62E-18	-0.470285351	3.72E-06	no	no	no	no
Dazap2	75.17233894	69.07749801	76.2825132	58.3573476	-0.276691484	0.002856491	0.095904316	0.403998199	no	no	no	no
Dbf4	2.112039623	29.31788213	11.24774029	28.02550619	3.544551491	0	-1.341116503	6.14E-61	no	yes	no	no
Dbi	80.41623997	57.47472482	86.5915973	67.70202612	-0.323328704	0.133575744	0.206966158	0.478601293	no	no	no	no
Dbn1	1.718749686	2.56494919	8.308539314	2.882088125	0.275921322	0.127418466	1.71441694	2.64E-07	no	no	no	yes
Dbndd1	1.448496041	3.763487816	3.069780434	3.548542051	1.012030211	2.20E-07	-0.11354219	0.671816408	yes	no	no	no
Dbndd2	4.368868114	4.0725157	12.19578435	5.22340739	-0.460612925	0.000172603	1.702853773	2.98E-09	no	no	no	yes
Dbnl	25.31206153	29.56238002	27.83915808	30.06217716	-0.062445412	0.502883189	0.002778571	0.979956568	no	no	no	no
Dbp	37.00040139	6.562219696	4.581182312	4.633462097	-2.792438182	5.59E-66	-0.415474192	0.017648703	no	no	yes	no
Dbr1	12.10356659	26.44048782	11.11624575	23.53689082	0.865522189	2.86E-30	-1.184785854	1.55E-38	no	yes	no	no
Dbt	61.27068172	34.78198465	39.74089811	35.5951376	-1.063451393	7.52E-77	0.23608198	0.034589645	no	no	yes	no
Dcaf10	18.65870894	10.60133555	18.06778254	12.05744817	-1.12055964	3.61E-52	0.870951719	2.35E-34	no	no	yes	no
Dcaf11	125.3916192	43.30538344	71.38967921	43.89804723	-1.818135058	3.22E-149	0.785512839	5.05E-22	no	no	yes	no
Dcaf12	24.95588784	34.30407716	35.51851296	35.03548981	0.180651499	0.010794421	0.13432666	0.150076279	no	no	no	no
Dcaf12l1	5.320287424	0.161325688	0.569059855	0.568708248	-5.002386886	3.54E-19	1.338208406	0.043255015	no	no	yes	no
Dcaf13	19.57514673	37.1418652	19.22277056	32.98683088	0.764042575	2.10E-07	-0.939871862	1.54E-07	no	no	no	no
Dcaf15	7.080925634	19.74843906	11.89964541	17.52846145	1.131129249	7.76E-37	-0.575616592	3.68E-06	yes	no	no	no
Dcaf17	9.200010714	20.02169953	13.35095644	16.38582197	0.823090997	2.42E-31	-0.482470825	6.24E-14	no	no	no	no
Dcaf4	2.751939109	21.30666919	10.08073093	18.18676351	2.722739701	4.86E-75	-0.999220053	1.80E-12	yes	no	no	no
Dcaf5	24.35931968	11.59793327	22.04903114	13.41244495	-1.38001999	3.79E-111	1.039955855	3.52E-42	no	no	no	yes
Dcaf6	32.20501329	19.11670242	29.41418746	18.23677962	-1.019596135	8.86E-31	0.685201193	1.11E-10	no	no	yes	no
Dcaf7	27.9518369	43.24269266	40.78876144	38.67128676	0.363784492	3.25E-14	-0.018246245	0.886011859	no	no	no	no
Dcaf8	38.55235197	31.60519959	32.61230857	27.22718189	-0.5433999	4.57E-44	0.099125572	0.006708191	no	no	no	no
Dcakd	22.51144861	52.28763767	45.38166409	56.05663403	0.988069583	1.99E-33	-0.17022507	0.055425461	no	no	no	no
Dcbld1	2.351590096	7.787914413	5.332213045	8.785062033	1.407183648	2.62E-32	-0.430949813	0.000857129	yes	no	no	no
Dcbld2	3.631960076	1.583435483	4.21243497	1.444757631	-1.528530023	1.23E-44	1.493162844	2.13E-05	no	no	no	yes
Dcdc2c	9.855538418	6.095172465	8.111258502	6.818563757	-0.959169014	2.50E-14	0.46475715	0.001273006	no	no	no	no
Dchs1	3.936142165	5.184652981	3.652810139	6.666130785	0.026890055	0.900335802	-0.327387232	0.049401601	no	no	no	no
Dck	5.011931631	21.84651384	15.54728678	20.38764314	1.840132559	1.17E-92	-0.397393892	2.21E-05	yes	no	no	no
Dclk3	18.1804362	12.77592352	11.0145469	13.07054191	-0.824943675	1.32E-09	-0.070421025	0.843212056	no	no	no	no
Dclre1a	15.28498153	19.57423527	12.16679564	19.14185396	0.042544905	0.638821346	-0.590690858	3.08E-26	no	no	no	no
Dclre1b	2.079739905	5.813774321	2.85331786	4.916256377	1.119608565	9.15E-27	-0.866348775	7.12E-15	yes	no	no	no
Dclre1c	4.895005275	12.01687672	4.909998319	10.03324343	0.977815401	1.55E-13	-1.151767093	1.56E-22	no	yes	no	no
Dcn	71.5360476	25.964884	29.37549826	25.75920969	-1.712428161	8.05E-39	0.219440244	0.357567364	no	no	yes	no
Dcp1a	7.392259827	14.45460725	13.05631389	13.57261065	0.62244664	2.56E-15	-0.011098637	0.924583361	no	no	no	no
Dcp1b	2.122275511	9.429461523	7.602447948	6.114628098	1.879854548	4.17E-72	-0.215284784	0.285523823	yes	no	no	no
Dcp2	14.10555864	30.72208989	19.93826723	29.80811767	0.833565939	1.28E-42	-0.530738838	7.27E-18	no	no	no	no
Dcps	28.69169181	36.98767616	32.7499868	33.90383164	0.116668436	0.261387471	-0.147892344	0.272253292	no	no	no	no
Dcstamp	3.058234339	0.21626497	0.526319581	0.142411522	-3.994398192	7.22E-33	1.191658234	0.005646769	no	no	no	yes
Dct	3.862781638	9.908206887	14.05484309	9.776757828	1.125773116	8.36E-06	0.553343517	0.006831297	yes	no	no	no
Dctd	0.195078736	29.41496352	1.359593519	27.83014021	6.920860887	4.76E-213	-4.266406166	1.63E-282	no	yes	no	no
Dctn1	18.67979545	31.9236612	24.87235944	30.07844486	0.472991443	2.34E-09	-0.263377374	0.052687143	no	no	no	no
Dctn2	67.06005613	51.23836143	60.4814663	52.17486216	-0.602571379	4.87E-18	0.241705988	0.002771248	no	no	no	no
Dctn3	19.32380877	21.3081678	20.21938274	19.98828317	-0.089792927	0.511108266	-0.017325846	0.93069206	no	no	no	no
Dctn4	16.70900813	22.5745517	24.75592797	20.86906063	0.16639448	0.005304143	0.201710104	3.79E-05	no	no	no	no
Dctn5	27.88638421	36.34305688	38.22470775	36.72761101	0.146556686	0.023371808	0.116596686	0.125236335	no	no	no	no
Dctn6	15.28064287	23.03547331	20.06058826	20.99688091	0.345676819	0.006489981	-0.136038333	0.489731432	no	no	no	no
Dctpp1	46.85365999	85.5776207	48.80009264	89.13883157	0.919229493	5.27E-09	-1.028416524	1.43E-07	no	yes	no	no
Dcun1d1	39.62697987	35.99694536	41.6219067	40.61691775	-0.389674145	2.10E-06	0.257728067	1.79E-05	no	no	no	no
Dcun1d2	12.96982148	10.73078458	8.699884091	11.26086257	-0.620206645	3.45E-11	-0.139972418	0.384791625	no	no	no	no
Dcun1d3	9.154081994	5.932497159	9.494858451	5.77220506	-0.961415727	1.10E-29	0.814785833	5.73E-13	no	no	no	no
Dcun1d4	30.34947876	8.897700395	9.373395174	7.990994038	-2.054564221	8.74E-168	0.167266208	0.212453749	no	no	yes	no
Dcun1d5	32.14232458	49.06266823	39.55653586	53.18650646	0.433031849	1.27E-05	-0.343960406	0.003783149	no	no	no	no
Dcxr	59.24239159	15.52450784	27.11525854	11.58176126	-2.270664021	1.87E-132	0.925073471	5.24E-10	no	no	yes	no
Dda1	15.69530056	21.8507472	19.5958929	21.62316602	0.156702248	0.076364591	-0.03830229	0.805715948	no	no	no	no
Ddah1	56.23066096	82.51650245	88.70840959	85.21524091	0.431673227	0.000687388	0.018877818	0.913913628	no	no	no	no
Ddah2	6.296224626	15.62274803	30.0758131	10.43193034	0.931295367	4.42E-07	1.077398334	1.26E-13	no	no	no	yes
Ddb1	82.39054521	103.1064992	108.4483552	105.0765101	0.441194775	0.020164055	-0.249992437	0.325009261	no	no	no	no
Ddb2	5.439886109	4.833414704	6.067228058	4.036886277	-0.452768604	4.77E-05	0.417914403	0.000672951	no	no	no	no
Ddc	46.74694496	30.4854598	41.36915309	31.40075808	-0.838963374	1.36E-08	0.449047007	0.01226685	no	no	no	no
Ddhd1	10.90154484	9.281741333	6.362633017	9.143419681	-0.527807576	1.87E-13	-0.424531096	2.51E-06	no	no	no	no
Ddhd2	17.34179283	26.49851755	23.77123429	27.03140123	0.323952488	5.07E-05	-0.077307333	0.47637226	no	no	no	no
Ddi2	30.01130685	18.40817003	15.62535057	18.95412905	-0.906344301	6.92E-20	-0.229317576	0.035017606	no	no	no	no
Ddit3	21.0090901	17.55903812	26.71171428	14.04061193	-0.620494768	2.14E-05	0.770761909	5.21E-06	no	no	no	no
Ddit4	7.078655882	17.46638078	11.83051461	9.278455813	0.94429861	0.000441599	-0.415939956	0.12366379	no	no	no	no
Ddo	13.94783585	0.287127429	0.312641014	0.635796132	-5.854586443	7.04E-44	0.271600771	0.667719461	no	no	yes	no
Ddost	73.32765646	75.27539727	86.05952967	83.17950984	-0.060131795	0.608507155	0.069768068	0.674247267	no	no	no	no
Ddr1	0.717048291	1.984115076	6.384069793	3.005093681	1.135926809	2.63E-07	1.700248032	1.94E-06	yes	no	no	yes
Ddr2	4.132489958	2.275106763	2.482750728	1.943803421	-1.213946616	2.30E-27	0.28535399	0.217676778	no	no	yes	no
Ddrgk1	74.33948907	37.02564384	41.02438278	35.92003465	-1.226899273	1.40E-33	0.180839185	0.146015747	no	no	yes	no
Ddt	134.9840046	77.57888074	109.4789663	93.6267252	-0.916190865	1.89E-15	0.389209875	0.016631791	no	no	no	no
Ddx1	44.15743213	64.74883948	50.91754543	65.81025556	0.492468623	0.000315242	-0.467123818	0.006179674	no	no	no	no
Ddx10	12.88263116	35.01494294	14.70332143	29.02822957	1.235537471	1.42E-34	-1.243727277	1.06E-22	no	yes	no	no
Ddx11	6.372764157	17.31539528	5.634923004	16.62115783	1.140874173	5.93E-48	-1.487377949	5.14E-50	no	yes	no	no
Ddx17	70.50404983	61.85511732	82.44319791	64.38523543	-0.374966047	9.70E-10	0.391837685	2.30E-07	no	no	no	no
Ddx18	19.70082006	56.40214731	20.82884225	55.71462331	1.397212834	3.55E-32	-1.492478943	2.16E-24	no	yes	no	no
Ddx19a	17.35572132	28.36783596	20.77472538	28.57130768	0.507987327	9.06E-18	-0.435529613	1.08E-07	no	no	no	no
Ddx19b	17.4421784	17.66791515	15.34055531	16.43397906	-0.328845925	5.70E-05	-0.047119483	0.696339955	no	no	no	no
Ddx20	11.12327619	26.91282155	10.89019217	26.35940224	1.024082247	8.36E-62	-1.257805892	1.36E-55	no	yes	no	no
Ddx21	28.00003886	83.55325452	22.3251607	81.01038094	1.562203554	3.79E-32	-2.061190527	8.21E-37	no	yes	no	no
Ddx23	31.72598996	41.34973343	30.27893663	40.82492625	0.149068508	0.04067265	-0.429858	1.19E-12	no	no	no	no
Ddx24	17.32283894	27.0726921	19.64090132	26.74894291	0.41159233	3.20E-12	-0.432845788	6.80E-12	no	no	no	no
Ddx26b	2.172165757	2.994378094	3.835761841	1.887644255	0.061550121	0.738097739	0.526916157	0.04172575	no	no	no	no
Ddx27	13.89022625	39.82196705	18.27492403	35.58086814	1.337893295	1.75E-48	-1.265565847	4.60E-16	no	yes	no	no
Ddx28	23.48794717	30.93076837	23.44811764	29.40769674	0.118929377	0.248746385	-0.327002319	0.043582626	no	no	no	no
Ddx31	7.798972078	19.53440226	7.364873209	19.95109109	1.036219007	1.24E-37	-1.274370969	2.57E-33	no	yes	no	no
Ddx39	21.6445647	72.53353214	41.21708488	75.90285225	1.682073831	3.32E-42	-0.950537054	1.34E-09	yes	no	no	no
Ddx39b	19.80920186	37.24549843	22.85382462	33.3654949	0.788689897	3.30E-17	-0.785847545	1.95E-13	no	no	no	no
Ddx3x	104.1010413	120.3867792	134.1052059	123.5631472	0.297876093	0.097355426	-0.129751149	0.61853536	no	no	no	no
Ddx3y	26.5735407	13.94805663	19.83270067	17.39879538	-1.022636194	0.407634467	0.253147302	0.778030534	no	no	no	no
Ddx41	36.11205257	49.8025396	35.89820868	48.45247005	0.220378159	0.016710524	-0.439725993	1.15E-05	no	no	no	no
Ddx42	29.15066869	40.74706072	30.76896196	36.37769817	0.237187023	0.000166921	-0.357923956	4.00E-06	no	no	no	no
Ddx46	23.49112871	42.46906126	22.78563294	40.76341829	0.666019188	3.90E-19	-0.893486883	2.96E-27	no	no	no	no
Ddx47	23.3048647	45.87971033	25.18548682	43.74149057	0.765265954	1.34E-12	-0.830116593	3.73E-12	no	no	no	no
Ddx49	11.81763329	20.31092276	12.66771992	18.29234022	0.557906524	2.09E-07	-0.643407505	2.79E-06	no	no	no	no
Ddx5	107.9523059	92.85797446	107.54915	100.811428	-0.203958739	0.187998325	-0.012725818	0.957850498	no	no	no	no
Ddx50	22.3536723	19.99963646	23.60504241	18.35472027	-0.410764962	1.73E-18	0.295747678	1.66E-05	no	no	no	no
Ddx51	8.981878666	23.14109657	7.722681292	19.5264134	1.054837297	5.11E-71	-1.479022394	2.11E-122	no	yes	no	no
Ddx52	16.72273043	33.52301216	26.40400197	32.4680199	0.758247766	1.67E-16	-0.275120242	0.014648051	no	no	no	no
Ddx54	23.71111618	33.91628725	19.78182628	30.70662187	0.254331365	0.000575884	-0.699513221	4.43E-21	no	no	no	no
Ddx55	5.383104819	14.61185703	5.469304432	13.75616224	1.158655015	1.64E-34	-1.301723825	1.29E-50	no	yes	no	no
Ddx56	18.98779453	42.76325253	19.59448729	39.90391937	1.011436233	2.54E-35	-1.156405768	2.93E-25	no	yes	no	no
Ddx58	14.3434933	10.79194575	28.62321417	11.47363599	-0.697075124	1.90E-14	1.489436248	2.70E-84	no	no	no	yes
Ddx59	4.918937353	8.538700872	6.245054992	6.734232016	0.50176372	1.85E-06	-0.368510082	0.007989608	no	no	no	no
Ddx6	38.09672622	37.51435451	40.73451747	37.74496534	-0.195362066	0.010129048	0.092265126	0.327207939	no	no	no	no
Ddx60	4.046796177	3.886633298	3.995707569	2.823923239	-0.334295686	0.040667489	0.111943144	0.60637735	no	no	no	no
Deaf1	8.487532661	12.99639816	8.170435189	11.40218394	0.324994524	3.85E-05	-0.555578052	3.41E-09	no	no	no	no
Deb1	59.00775205	46.22315106	48.53959387	45.67032135	-0.60518654	3.69E-11	0.101976529	0.42661508	no	no	no	no
Decr1	64.61248745	32.03335254	47.85135196	33.52120486	-1.197988906	2.48E-31	0.563004105	3.70E-05	no	no	yes	no
Decr2	103.8275463	18.500553	52.23665508	24.81044934	-2.76823441	6.18E-179	1.563282417	4.78E-33	no	no	no	yes
Dedd	23.14971293	16.21712663	19.32480582	15.89585672	-0.822645896	2.86E-42	0.353865379	9.58E-05	no	no	no	no
Dedd2	22.53694226	25.95961619	22.35599651	26.96182035	-0.123232605	0.218027946	-0.098613186	0.382971785	no	no	no	no
Def8	16.64810186	16.95313667	8.970465262	13.85598819	-0.27347105	0.00328654	-0.80834282	4.75E-12	no	no	no	no
Defb1	0.536627381	2.991287995	14.2505971	3.418979126	2.119593553	5.90E-07	2.192894617	1.28E-07	yes	no	no	yes
Degs1	53.19896114	43.06621102	56.21909075	52.5400871	-0.534918739	1.84E-22	0.401147118	1.29E-07	no	no	no	no
Dek	36.61180165	73.40323263	52.43622135	79.73715671	0.970785714	4.22E-12	-0.641636983	1.70E-05	no	no	no	no
Dennd1a	7.188494553	7.55734116	7.807516078	7.345068652	-0.246365249	0.006937565	0.198454593	0.206236934	no	no	no	no
Dennd1b	16.54685793	14.31839017	19.42225352	13.15717466	-0.515128214	1.05E-12	0.545109071	1.32E-18	no	no	no	no
Dennd1c	3.444309077	2.557493112	4.991937205	2.74717747	-0.740493373	3.55E-06	1.057644191	4.37E-09	no	no	no	yes
Dennd2a	3.217519821	2.297796265	2.725984246	5.37152364	-0.944887315	4.81E-15	0.495826264	0.070041446	no	no	no	no
Dennd2d	7.88402657	8.8819967	12.96569898	8.579818379	-0.083553365	0.531198821	0.594993767	1.93E-06	no	no	no	no
Dennd3	4.084929012	1.888798485	7.054878677	2.901273847	-1.431313943	3.69E-28	2.011824698	1.36E-44	no	no	no	yes
Dennd4a	12.8121079	16.8078687	14.49846373	14.74425281	0.09380175	0.387250675	-0.111120351	0.439574064	no	no	no	no
Dennd4b	4.53958867	6.97744596	5.158244127	6.220486604	0.236492011	0.083480706	-0.256097315	0.101978992	no	no	no	no
Dennd4c	22.40165782	19.69253797	19.11199628	19.10668536	-0.467537299	2.02E-14	0.044339017	0.557230482	no	no	no	no
Dennd5a	17.3200069	19.43739184	21.95489933	19.22714703	-0.100608288	0.076041404	0.261022129	9.32E-06	no	no	no	no
Dennd5b	51.88408231	21.8830639	34.02033233	26.22059716	-1.550169823	4.45E-120	0.740215736	1.73E-21	no	no	yes	no
Dennd6a	17.27131345	21.6002815	20.50471906	20.57922819	0.054543223	0.356133117	-0.002351139	0.975081158	no	no	no	no
Dennd6b	3.52866585	6.949793219	3.490852516	5.990431264	0.642786616	7.78E-09	-0.8307792	1.11E-09	no	no	no	no
Denr	20.82081477	31.37527515	16.28625757	30.68708997	0.419243043	2.75E-07	-0.974716738	4.04E-21	no	no	no	no
Depdc1a	0.168037225	19.21309407	6.030214019	15.5089015	6.414705569	3.96E-167	-1.56318218	1.96E-24	no	yes	no	no
Depdc1b	0.119482869	11.09771648	2.736335828	12.27037543	6.212503291	3.16E-91	-1.821949678	4.16E-23	no	yes	no	no
Depdc5	6.35836684	10.65462936	11.43976202	12.52636101	0.459084898	1.23E-10	0.218030591	0.19892142	no	no	no	no
Depdc7	42.05966975	27.82158525	40.81986016	35.77231658	-0.844107041	6.50E-17	0.605647759	2.99E-06	no	no	no	no
Deptor	56.17303778	25.29693428	27.53945856	21.55022017	-1.43434523	3.11E-85	0.208508763	0.092357556	no	no	yes	no
Dera	23.79142883	20.72467943	24.23846065	21.02473244	-0.414642896	4.57E-08	0.2317727	0.038356183	no	no	no	no
Derl1	76.43734217	54.30740399	65.02524799	58.25833137	-0.695877531	7.26E-34	0.242586876	0.010936967	no	no	no	no
Derl2	45.66422093	18.31797481	29.26482942	20.83433426	-1.616879455	8.33E-123	0.772450859	7.00E-16	no	no	yes	no
Derl3	20.53695138	4.504663664	10.83104568	8.792582246	-2.515375239	8.13E-15	1.35531116	1.51E-07	no	no	no	yes
Des	6.415157915	5.50522529	5.859354161	4.136126855	-0.522418487	0.000266246	0.194542686	0.3874657	no	no	no	no
Desi1	29.68029087	30.89213076	22.05557031	31.88260142	-0.222001101	0.000319437	-0.403818853	0.000138033	no	no	no	no
Desi2	17.25880218	31.84883847	48.40614756	31.98730844	0.621029874	3.23E-11	0.668549517	1.03E-26	no	no	no	no
Det1	6.95765628	6.348658767	3.797740265	4.510480526	-0.408656721	1.32E-05	-0.621602387	2.32E-08	no	no	no	no
Dexi	30.27768919	8.451874221	11.33977683	8.995109402	-2.193955424	8.09E-108	0.586669003	0.000185281	no	no	yes	no
Dffa	18.98663637	44.56398453	34.54650664	39.69141921	0.971352264	1.83E-40	-0.315897347	0.001817247	no	no	no	no
Dffb	4.730925532	12.66421674	7.030508357	9.088981475	1.1166381	3.08E-26	-0.732344148	6.50E-08	yes	no	no	no
Dfna5	16.82377458	19.57836888	10.35582747	16.72191382	-0.039205071	0.777733096	-0.853715603	1.82E-16	no	no	no	no
Dgat1	32.49416224	24.91478497	23.82777285	26.23338307	-0.697871523	1.67E-18	0.046374812	0.735578026	no	no	no	no
Dgat2	134.1530593	69.21698393	100.9687157	83.73863716	-1.106783536	8.08E-28	0.481232375	0.000102633	no	no	yes	no
Dgcr14	5.858062842	11.29416906	8.402619933	9.328200868	0.630168091	8.37E-15	-0.290239743	0.001612366	no	no	no	no
Dgcr2	50.87645098	42.38866053	35.07604565	44.67366933	-0.537406826	2.36E-55	-0.203043696	0.000550688	no	no	no	no
Dgcr6	38.19090947	27.69886982	14.57776207	22.16355721	-0.744483246	2.54E-12	-0.829647183	6.76E-08	no	no	no	no
Dgcr8	8.312316707	24.95067791	12.38737309	21.54080571	1.318212446	1.26E-89	-0.929356832	8.03E-38	yes	no	no	no
Dgka	9.666804333	2.819804351	7.802050885	2.971918671	-2.194590336	3.98E-115	1.719436811	1.99E-39	no	no	no	yes
Dgkd	17.53342076	37.27329598	24.96861039	35.21344006	0.845892383	5.54E-54	-0.530082713	1.93E-14	no	no	no	no
Dgke	2.444993072	3.737068479	2.302396213	3.766550717	0.31633783	0.026599347	-0.591836924	0.001744243	no	no	no	no
Dgkq	21.90011795	11.34613005	15.34012971	11.50728085	-1.286353216	5.04E-72	0.575077106	3.03E-06	no	no	yes	no
Dgkz	20.83473261	45.41191926	27.75602421	42.96680641	0.925137725	5.71E-34	-0.712105382	3.93E-19	no	no	no	no
Dguok	11.45898155	8.831724842	12.5042129	9.004858349	-0.68220409	3.99E-18	0.609135443	6.70E-13	no	no	no	no
Dhcr24	143.4288947	82.97523877	130.4443803	102.6919299	-0.876442219	4.51E-14	0.520012097	0.000397229	no	no	no	no
Dhcr7	48.71821816	39.61861573	54.69207403	52.41481458	-0.52819498	5.51E-06	0.496047519	1.77E-07	no	no	no	no
Dhdds	25.41073808	23.24785042	28.56651815	21.02670966	-0.417305108	7.05E-09	0.39207656	1.58E-08	no	no	no	no
Dhdh	99.7382239	33.45903658	34.76744448	31.60387497	-1.850637716	8.48E-199	0.119549448	0.326996009	no	no	yes	no
Dhfr	19.09623693	28.34556311	25.19102237	27.11109502	0.351141208	3.44E-07	-0.154379491	0.206634913	no	no	no	no
Dhodh	6.549749079	25.51087608	7.197498644	25.67036269	1.77631208	5.80E-130	-1.803325865	2.75E-68	no	yes	no	no
Dhps	13.65325014	38.38974319	17.67982416	26.67171983	1.229880249	7.78E-48	-1.057256924	2.15E-28	no	yes	no	no
Dhrs1	79.90683348	29.76194307	56.00340005	30.13614622	-1.703326323	5.70E-118	0.974989416	4.08E-23	no	no	yes	no
Dhrs11	23.96317136	12.97713063	15.26433867	9.103700339	-1.213018456	2.77E-07	0.356351752	0.285277274	no	no	yes	no
Dhrs13	8.716841462	23.34974656	10.88613506	22.88057864	1.103594878	1.42E-32	-0.984795335	1.89E-30	yes	no	no	no
Dhrs3	87.20868052	30.51198568	53.94264138	38.57250597	-1.786098777	5.19E-236	0.88992373	8.56E-38	no	no	yes	no
Dhrs4	71.03403249	32.32015391	44.80145217	37.55613163	-1.383401289	3.53E-45	0.512511684	4.31E-05	no	no	yes	no
Dhrs7	26.5920223	11.6456824	13.81401064	11.28247154	-1.454280166	1.08E-16	0.320758575	0.146144193	no	no	yes	no
Dhrs7b	22.02382634	33.74232812	22.23103824	32.8171442	0.388884266	0.000893631	-0.562181231	3.16E-05	no	no	no	no
Dhrs9	0.438971971	21.9162803	51.45773071	25.52295383	5.309735828	1.97E-116	1.291490605	2.39E-09	yes	no	no	yes
Dhrsx	17.29894214	15.20346486	14.27976029	12.37562187	-0.557109947	5.77E-05	0.079154679	0.614024976	no	no	no	no
Dhtkd1	59.5370761	35.45173895	39.44852752	36.51608757	-0.977961045	1.24E-43	0.180945054	0.197189366	no	no	no	no
Dhx15	24.14892332	46.37889989	29.869834	45.80510241	0.862019285	1.30E-14	-0.742626412	1.32E-08	no	no	no	no
Dhx16	29.10660706	33.25052415	23.36386608	32.69943448	-0.090044242	0.249643489	-0.429233858	3.68E-11	no	no	no	no
Dhx29	9.654947503	9.044925016	6.30357105	10.54579783	-0.399572741	2.35E-05	-0.390384192	0.001063997	no	no	no	no
Dhx30	22.74351076	41.07027703	22.44700575	38.30040673	0.604166966	8.76E-19	-0.822138019	6.72E-44	no	no	no	no
Dhx32	23.29095131	19.27004521	13.21103551	18.31750506	-0.518224934	8.60E-07	-0.494826203	4.02E-05	no	no	no	no
Dhx33	18.497729	28.06283449	13.57736452	27.16010949	0.35522618	7.63E-06	-0.980830508	5.13E-89	no	no	no	no
Dhx34	5.013512438	7.738259996	6.667206095	6.967985394	0.269525975	0.009045184	-0.061208376	0.561859692	no	no	no	no
Dhx35	5.292118277	12.97588419	7.963660238	10.58605078	0.997152617	1.02E-31	-0.597343207	5.31E-08	no	no	no	no
Dhx36	25.16964323	32.30227478	23.43064601	28.86533834	0.154247988	0.105190669	-0.449332964	1.64E-07	no	no	no	no
Dhx37	8.530731638	18.59942058	7.404113918	16.95108733	0.838766034	6.25E-25	-1.194943762	1.21E-32	no	yes	no	no
Dhx38	19.37070633	31.62390002	23.66233259	31.11975485	0.411114761	6.35E-08	-0.320596981	0.000120089	no	no	no	no
Dhx40	24.88383331	20.78380592	28.48644853	22.51852475	-0.48990884	4.42E-08	0.487253293	1.18E-05	no	no	no	no
Dhx57	8.850541872	12.63524085	19.84797663	12.07889372	0.247111489	0.000714632	0.748101685	1.68E-14	no	no	no	no
Dhx58	7.212643498	5.720560235	4.285614834	4.073517565	-0.626216762	1.28E-08	-0.291417075	0.057480961	no	no	no	no
Dhx8	15.76044857	22.24614385	17.09139622	22.64696192	0.239182514	0.006106923	-0.311120318	0.001484962	no	no	no	no
Dhx9	27.05080307	55.16524106	36.35443814	53.4423415	0.999674145	4.27E-15	-0.757852143	9.32E-07	no	no	no	no
Diablo	10.48256604	11.40592661	10.12088124	11.19775181	-0.151140514	0.007434954	-0.103019779	0.147101686	no	no	no	no
Diap1	41.03543568	39.18754297	44.11223174	41.55631726	-0.31421782	7.98E-06	0.214865195	0.001484872	no	no	no	no
Diap2	11.48929062	6.719785798	5.594807386	6.183680053	-1.0439987	1.94E-24	-0.18704328	0.223346648	no	no	yes	no
Diap3	0.245779269	6.68616281	3.228812568	9.827480372	4.435520323	4.67E-63	-0.95052785	5.91E-05	yes	no	no	no
Dicer1	17.53057348	33.41196355	25.34920195	31.03909442	0.69514828	1.42E-51	-0.372520092	6.20E-06	no	no	no	no
Dido1	22.76843276	24.82191069	26.22877664	24.29891636	-0.18018819	0.0016108	0.176796016	0.005860772	no	no	no	no
Diexf	5.153020825	17.69254607	5.217318526	16.69451955	1.495339111	4.15E-141	-1.641276011	1.68E-81	no	yes	no	no
Dimt1	5.793451099	19.96315889	7.263618181	17.46557047	1.490134584	1.29E-53	-1.378842047	4.11E-57	no	yes	no	no
Dio1	116.173888	0.37443533	6.147909649	1.973883233	-8.479534226	1.89E-83	3.520407682	6.32E-11	no	no	no	yes
Dip2a	2.620105586	5.67624649	7.651951155	7.661353525	0.813337666	2.73E-14	0.593150177	2.63E-06	no	no	no	no
Dip2b	7.569956358	16.53987868	12.05479281	14.78699862	0.85154828	5.64E-39	-0.357717194	1.58E-06	no	no	no	no
Dip2c	14.24678824	4.071363305	3.826553287	2.199352488	-2.167473755	7.81E-48	0.057252318	0.826080407	no	no	yes	no
Dirc2	16.27493149	8.116311328	7.649944313	8.449867225	-1.325000632	2.72E-39	0.034352478	0.789010398	no	no	yes	no
Dis3	8.583279522	42.53088515	12.25133018	40.57988392	2.15452315	1.46E-109	-1.804575761	1.50E-68	no	yes	no	no
Dis3l	11.35117973	12.40130824	10.13180938	15.20773937	-0.199438991	0.021725526	-0.165066124	0.154651596	no	no	no	no
Dis3l2	9.867128618	12.46068504	11.2084792	11.99911907	0.042417143	0.646999265	-0.032415668	0.792606905	no	no	no	no
Disp1	1.94556351	3.327200667	3.017860485	3.227452869	0.429222385	0.000681684	0.004476035	0.984429936	no	no	no	no
Dixdc1	14.06490222	2.083195827	12.51371034	2.428863635	-3.075021006	2.87E-216	2.701096199	1.20E-87	no	no	no	yes
Dkc1	16.90867138	64.52582242	17.37318848	63.88861403	1.830971403	3.75E-75	-1.986372298	1.09E-65	no	yes	no	no
Dkk3	1.875931602	3.225094473	3.455659221	2.605934104	0.420990219	0.020547851	0.259746996	0.410915832	no	no	no	no
Dlat	23.77291028	44.01172941	26.17045658	41.20080804	0.696363945	3.01E-28	-0.758979455	9.86E-18	no	no	no	no
Dlc1	27.79934954	17.59359504	26.16081131	19.65791455	-0.95910316	5.14E-35	0.674992095	4.24E-14	no	no	no	no
Dld	71.45155964	81.36222533	74.96988481	83.23173939	0.214708341	0.216067111	-0.340975579	0.132255672	no	no	no	no
Dlg1	28.36627962	27.10441279	36.04154816	27.16647691	-0.312099351	9.79E-11	0.457692043	1.37E-12	no	no	no	no
Dlg3	9.70238744	8.757478558	10.31753562	7.611506994	-0.449296299	1.36E-10	0.342031993	0.003141101	no	no	no	no
Dlg5	3.00416197	3.378765767	2.256685117	3.546598868	-0.155355954	0.425767091	-0.41258943	0.105477511	no	no	no	no
Dlgap4	3.596514179	2.612478123	3.846359478	2.490594002	-0.790450997	9.01E-12	0.709545891	1.05E-05	no	no	no	no
Dlgap5	0.556825541	16.23013969	7.033741966	15.42355155	4.578574464	7.92E-125	-1.138969416	8.13E-24	no	yes	no	no
Dlk1	0.036221821	23.61464574	16.92831537	12.19027773	8.98010522	5.42E-125	-0.510973705	0.003446301	yes	no	no	no
Dll1	6.314417965	9.969842391	7.248825927	6.748190255	0.339279327	0.132189675	-0.327637021	0.208144626	no	no	no	no
Dll4	5.679843946	3.742385751	4.246564796	5.936968139	-0.960602909	4.21E-11	0.366462418	0.111456026	no	no	no	no
Dlst	37.08110404	39.62200326	35.28069326	40.54235208	0.010910148	0.927898232	-0.29154031	0.046149359	no	no	no	no
Dmap1	23.36859716	33.00137253	28.36407507	32.78792029	0.208481389	0.025377139	-0.135717337	0.174453573	no	no	no	no
Dmd	5.762494093	5.363315829	7.549027227	5.68427342	-0.397204936	9.04E-05	0.593385643	3.40E-10	no	no	no	no
Dmgdh	106.13971	26.90883325	65.45367121	48.2132298	-2.198960968	6.56E-31	1.27945866	7.51E-08	no	no	no	yes
Dmpk	15.74897477	11.84118139	26.38257221	9.76437373	-0.768943551	3.73E-06	1.299473612	8.49E-13	no	no	no	yes
Dmtf1	7.976436561	10.62388397	11.19076943	10.70284044	0.082348899	0.423644599	0.202482319	0.019961321	no	no	no	no
Dmtn	0.130435419	8.915870744	7.66115332	11.87775662	5.66145276	6.14E-46	-0.012837581	0.977835701	yes	no	no	no
Dmwd	14.2863388	22.34611118	15.9039127	19.97919733	0.305547296	3.93E-05	-0.360241936	7.25E-05	no	no	no	no
Dmxl1	21.27423832	32.63638522	33.08504003	33.68097024	0.378844869	1.14E-06	0.061398849	0.412767688	no	no	no	no
Dmxl2	16.47779759	33.84925821	28.31977781	38.2684508	0.785748876	8.60E-14	-0.203385104	0.036084981	no	no	no	no
Dna2	7.591352879	30.85423506	11.80908088	29.91824517	1.78364631	7.81E-133	-1.323087314	2.56E-50	no	yes	no	no
Dnaaf2	4.453081503	12.80199174	5.743700295	11.86616857	1.195372627	1.52E-56	-1.054100367	8.36E-35	no	yes	no	no
Dnaic1	3.933733773	0.084759308	2.279106243	0.103303363	-6.245175362	6.62E-49	4.201553002	1.32E-12	no	no	no	yes
Dnaja1	42.93060705	27.69254287	32.45976933	31.9890113	-0.763349209	2.26E-15	0.155197939	0.186961934	no	no	no	no
Dnaja2	43.1124972	46.73842735	37.98987151	49.76749914	0.008557207	0.939793148	-0.387141802	0.000664056	no	no	no	no
Dnaja3	45.95739641	41.85267636	32.49217914	44.83363012	-0.315620417	0.000273024	-0.397107633	0.000324531	no	no	no	no
Dnaja4	5.904485368	3.464791951	2.349494424	2.836039258	-1.10295456	1.53E-14	-0.414989947	0.055088492	no	no	yes	no
Dnajb1	28.13719472	26.97183297	32.00949937	32.0217677	-0.359672745	5.04E-05	0.334076263	0.002465195	no	no	no	no
Dnajb11	46.47484732	23.56936143	33.75653666	29.67294052	-1.234998559	5.53E-53	0.574099351	5.05E-09	no	no	yes	no
Dnajb12	39.71401307	28.29983062	30.81453239	29.34033968	-0.750574228	1.40E-34	0.213758411	0.009030681	no	no	no	no
Dnajb13	0.415263094	3.608138854	4.047945498	1.987460642	2.581646778	5.85E-17	0.327405535	0.283736071	yes	no	no	no
Dnajb14	5.735707355	5.118595688	4.269881616	4.42074361	-0.431406481	2.15E-07	-0.190970033	0.109140739	no	no	no	no
Dnajb2	31.3106841	9.03360421	14.28255585	10.1432545	-2.122262199	9.06E-78	0.786885607	2.28E-08	no	no	yes	no
Dnajb3	13.49410755	5.007452281	8.191874347	5.627651282	-1.795423983	1.21E-24	0.860015258	3.42E-05	no	no	yes	no
Dnajb4	19.6102609	12.46656123	21.76592995	11.33259856	-0.953277231	3.93E-36	0.898484346	1.24E-34	no	no	no	no
Dnajb5	6.222411383	1.444599185	3.516282195	1.355686684	-2.526608443	7.68E-70	1.48065801	3.78E-10	no	no	no	yes
Dnajb6	21.50236188	25.66826084	22.57616742	25.08121604	0.035314707	0.603508649	-0.151601342	0.012029525	no	no	no	no
Dnajb7	2.372887021	3.512285907	2.451425976	3.520896276	0.16675621	0.48533991	-0.317737524	0.275673094	no	no	no	no
Dnajb9	47.64776058	15.97444626	50.56178384	20.58298782	-1.858044842	2.24E-59	1.745246089	2.21E-62	no	no	no	yes
Dnajc1	14.90577416	13.07340846	13.62203403	12.66960604	-0.499166099	3.39E-16	0.168350229	0.038697995	no	no	no	no
Dnajc10	30.10745113	29.96435892	38.54567387	30.47743138	-0.214576434	0.014488259	0.387585099	0.002087065	no	no	no	no
Dnajc11	19.3199012	33.82744153	18.47196087	31.03371276	0.642928351	1.95E-19	-0.903403636	1.04E-23	no	no	no	no
Dnajc12	9.829221427	10.2923898	18.9413572	14.0238506	-0.209015636	0.22843439	0.996339872	1.04E-06	no	no	no	no
Dnajc13	20.61708583	37.27377074	30.3049413	35.637148	0.666899431	1.74E-12	-0.305900319	0.012897671	no	no	no	no
Dnajc14	18.3066665	12.68641097	15.84384122	13.54642027	-0.843708483	2.11E-33	0.41783196	1.20E-09	no	no	no	no
Dnajc15	39.22192187	47.03944866	33.2286599	45.01615955	0.133746146	0.375120629	-0.588948306	0.00037026	no	no	no	no
Dnajc16	13.19610341	10.88954106	9.588375983	10.86917433	-0.5844798	6.16E-21	-0.038347841	0.79639954	no	no	no	no
Dnajc17	3.991033928	9.529406602	3.726202511	7.46622517	1.018222647	3.29E-07	-1.25260565	2.18E-09	no	yes	no	no
Dnajc18	8.162456484	11.74027242	15.73817285	12.55662677	0.216971203	0.024956097	0.526649475	3.18E-11	no	no	no	no
Dnajc19	23.11930246	24.27904365	24.8600257	23.42352878	-0.100223611	0.282966215	0.019828911	0.892390858	no	no	no	no
Dnajc2	9.584512767	26.43079975	11.7605536	24.19594485	1.321862376	6.87E-45	-1.202462303	2.71E-25	no	yes	no	no
Dnajc21	10.49290999	14.2341317	8.319392535	13.77603736	0.186706235	0.006105138	-0.696801127	6.03E-16	no	no	no	no
Dnajc22	107.7283932	79.59077263	86.18443346	91.20295655	-0.605585473	2.01E-14	0.071927213	0.541166358	no	no	no	no
Dnajc24	10.48568905	12.95424059	9.820766939	11.4268631	0.013723448	0.927750888	-0.248196505	0.147157383	no	no	no	no
Dnajc25	23.5596635	15.00787846	14.95886798	16.18278928	-0.963559565	1.42E-35	0.125222187	0.326500399	no	no	no	no
Dnajc27	0.813477792	7.324546454	2.26043329	5.942129395	2.833888958	2.24E-119	-1.513259458	9.34E-40	no	yes	no	no
Dnajc28	17.5865424	5.382772461	9.532521182	4.698497224	-2.016782719	7.60E-96	0.941786698	1.35E-07	no	no	yes	no
Dnajc3	97.30862637	55.60751239	87.21744418	70.4914555	-1.000937226	3.49E-33	0.636222924	3.74E-12	no	no	yes	no
Dnajc30	26.61101877	12.89749661	16.1434138	11.78164034	-1.371335558	2.11E-40	0.428973011	0.000522123	no	no	yes	no
Dnajc4	19.8576404	10.76235431	12.46850193	9.836212366	-1.139748701	4.29E-23	0.243811448	0.099020713	no	no	yes	no
Dnajc5	51.18048818	40.95223386	55.37457535	41.26071209	-0.605884601	3.16E-44	0.513190288	5.67E-17	no	no	no	no
Dnajc6	0.100136612	22.86552256	7.377384956	22.62296626	7.522796412	8.58E-230	-1.513856119	7.72E-10	no	yes	no	no
Dnajc7	27.4685913	42.05107738	31.70065637	38.0961995	0.440554961	1.77E-07	-0.435043384	0.000750926	no	no	no	no
Dnajc8	28.74060622	55.83097492	32.0145738	49.05942233	0.821054206	4.73E-15	-0.838682438	9.28E-11	no	no	no	no
Dnajc9	9.838836265	36.72128404	22.64523137	40.65991938	1.682075469	1.88E-70	-0.69295772	1.70E-15	yes	no	no	no
Dnal4	10.2445021	15.15931752	10.48477218	13.36596473	0.27604663	0.003263278	-0.435129459	1.21E-05	no	no	no	no
Dnase1	3.922552275	25.31498485	7.195127451	23.79074437	2.354649041	4.50E-55	-1.656382019	9.99E-28	no	yes	no	no
Dnase1l1	8.150560835	9.558317452	10.59137048	8.571724637	-0.088749723	0.330556648	0.265271543	0.030618082	no	no	no	no
Dnase1l3	33.12893302	3.420413015	3.908879804	2.25271608	-3.581581692	4.56E-46	0.287673156	0.514543311	no	no	yes	no
Dnase2a	13.55160151	7.251206042	8.443053695	6.498788869	-1.21871704	2.53E-47	0.337275107	0.018266841	no	no	yes	no
Dnase2b	28.58964563	1.59416311	5.124524862	2.347176673	-4.467605664	4.08E-31	1.669115988	0.000330047	no	no	no	yes
Dnlz	15.90807542	26.16872088	14.19488978	22.62432608	0.398705292	1.48E-05	-0.774807803	5.04E-19	no	no	no	no
Dnm1l	31.21621955	47.75856899	32.94978823	48.97138789	0.412443073	3.58E-07	-0.532686334	3.92E-22	no	no	no	no
Dnm2	25.27303338	20.90690222	27.8566378	22.07497946	-0.555799768	3.55E-18	0.505475846	1.46E-08	no	no	no	no
Dnmbp	16.5827187	12.72756037	12.47486531	13.93814315	-0.709989889	3.34E-27	0.098968556	0.398130995	no	no	no	no
Dnmt1	7.454900588	40.20821777	18.08141111	41.14780011	2.241469422	1.03E-130	-1.146805595	1.60E-50	no	yes	no	no
Dnmt3a	11.25503948	27.5261678	31.22267901	35.51081777	0.990977944	5.66E-54	0.268763026	0.011473597	no	no	no	no
Dnmt3b	4.341656176	19.93464436	9.424970816	17.05308466	1.958661999	3.27E-45	-1.000599129	2.73E-09	no	yes	no	no
Dnpep	27.8366658	22.20185064	42.28186754	26.37438459	-0.551483889	6.09E-09	0.955448377	2.90E-19	no	no	no	no
Dnph1	21.46041057	35.09126507	4.057575983	27.07553725	0.429021191	2.99E-07	-3.005840019	9.04E-102	no	yes	no	no
Dnttip1	12.13095321	22.01072975	31.23764621	21.80640577	0.630056904	5.50E-16	0.070980246	0.751674613	no	no	no	no
Dnttip2	24.94782597	74.62601652	34.64173407	65.57601322	1.461126338	4.05E-49	-1.180481095	3.34E-20	no	yes	no	no
Doc2a	1.559496602	6.15593567	3.205963074	5.346246863	1.642390331	1.36E-35	-0.839093185	1.07E-09	yes	no	no	no
Doc2g	2.836749616	7.730387399	3.360726026	6.551794651	1.067818555	7.01E-11	-1.014229553	5.75E-08	no	yes	no	no
Dock1	9.621373366	3.954810198	5.925584822	3.481589122	-1.531053784	1.86E-12	0.642256227	0.042490941	no	no	yes	no
Dock10	2.26385603	4.487263555	4.809553562	2.755947287	0.690925097	2.39E-11	0.219236669	0.169813046	no	no	no	no
Dock11	0.855473307	2.908593398	3.088456714	2.306855335	1.541464928	2.69E-18	0.117694372	0.619640525	yes	no	no	no
Dock2	1.749772147	6.0235203	5.973172967	5.464120185	1.598357523	7.32E-33	0.020602729	0.925157297	yes	no	no	no
Dock4	13.43956587	3.386289809	3.01583913	2.843443801	-2.279242941	2.17E-206	-0.070404857	0.644433601	no	no	yes	no
Dock5	12.3128169	10.46310289	9.80984619	12.0522081	-0.546114113	3.76E-17	0.034146971	0.816015152	no	no	no	no
Dock6	9.395362373	8.954098109	8.644492355	10.99274402	-0.38056474	0.006031151	0.092210642	0.526789935	no	no	no	no
Dock7	9.447376848	23.06526327	13.29625639	18.54130062	1.06424653	1.16E-18	-0.727970275	5.87E-10	yes	no	no	no
Dock8	18.26624089	4.770502107	4.815522843	7.104809864	-2.288170023	3.64E-147	0.161478073	0.285421172	no	no	yes	no
Dock9	8.99650432	17.34467744	11.45317912	15.84237792	0.694572096	1.33E-15	-0.543651497	6.60E-09	no	no	no	no
Dohh	21.9136592	40.31760223	20.01913766	37.43389962	0.663333435	5.26E-08	-0.999347471	8.89E-18	no	no	no	no
Dok1	2.908123557	7.056601005	7.587819675	5.039151089	0.888274344	1.48E-10	0.294908083	0.051036339	no	no	no	no
Dok2	2.695297638	6.040311615	9.28479428	4.458861417	0.881352264	3.08E-07	0.730352821	6.54E-07	no	no	no	no
Dok3	1.71669569	3.019480312	3.803909602	3.030344458	0.451681024	0.015406453	0.486944335	0.022439467	no	no	no	no
Dok4	2.01889914	3.976110529	5.321446457	3.425658763	0.602485653	0.000132912	0.589594054	2.29E-05	no	no	no	no
Dolk	26.955985	26.48469264	19.25712679	23.90912132	-0.340437282	6.96E-07	-0.345512454	8.71E-06	no	no	no	no
Dolpp1	17.77171986	15.88545011	15.02173834	15.78294664	-0.529424683	3.68E-09	0.099053218	0.521783213	no	no	no	no
Donson	5.60162427	17.17174459	11.98349479	16.73862354	1.288593238	2.68E-26	-0.392276357	0.000713441	yes	no	no	no
Dopey1	9.792652931	10.92861293	10.5938612	10.83518711	-0.1569287	0.014914812	0.073577377	0.328535887	no	no	no	no
Dopey2	13.09587026	9.555417093	19.56037849	10.81801729	-0.784474832	6.36E-07	1.150854504	2.44E-13	no	no	no	yes
Dos	3.189340231	8.10700156	6.043528418	9.886533834	1.01292305	3.09E-16	-0.293236649	0.095598477	yes	no	no	no
Dot1l	8.812924176	21.55551539	12.71383792	21.0131551	0.986034864	2.52E-38	-0.649404579	3.44E-08	no	no	no	no
Dpagt1	24.43143238	22.34083066	21.52502627	19.78235076	-0.428439182	9.70E-14	0.044893416	0.579006425	no	no	no	no
Dpcd	9.992684851	9.519548182	7.116897634	8.044916399	-0.348265873	0.0020321	-0.316339369	0.03060268	no	no	no	no
Dpep1	1.110196624	2.707785122	13.07695419	2.540816343	0.904219612	0.002051607	2.318400614	1.03E-10	no	no	no	yes
Dpf1	0.304738251	6.342560918	1.084474426	4.549772832	3.923014577	5.03E-63	-2.239859907	9.22E-21	no	yes	no	no
Dpf2	13.05901141	17.24155979	17.29980444	16.86255444	0.098310027	0.033436116	0.105296398	0.031079367	no	no	no	no
Dpf3	1.249719026	4.147247072	5.045528336	4.041610647	1.467482957	1.77E-19	0.383762687	0.01463418	yes	no	no	no
Dph2	5.306729252	27.67851272	6.988751918	24.36731265	2.079668813	3.42E-111	-1.869874154	2.36E-64	no	yes	no	no
Dph3	14.20828759	15.00489281	12.963864	13.98411709	-0.170665661	0.024214082	-0.171362084	0.045578029	no	no	no	no
Dph5	7.56223497	19.77524167	7.063826246	18.58905683	1.127275046	2.74E-65	-1.432145894	1.94E-59	no	yes	no	no
Dph6	3.6243761	9.578523113	4.74412314	8.188438361	1.12541335	3.56E-63	-0.935646091	2.62E-45	yes	no	no	no
Dph7	5.175871453	13.81478347	6.742382897	11.11516341	1.125445713	6.79E-55	-0.914353246	6.11E-28	yes	no	no	no
Dpm1	3.852267903	4.712949925	6.669184407	4.534740772	-0.090108573	0.732189127	0.673436072	0.048539841	no	no	no	no
Dpm2	21.89032936	31.75078044	22.69465856	29.0973599	0.271396911	0.003156519	-0.414927699	1.66E-05	no	no	no	no
Dpm3	63.62425645	54.0759772	45.60264039	54.02508016	-0.458084307	1.43E-05	-0.243427903	0.086428907	no	no	no	no
Dpp3	26.29037266	27.056649	29.80236308	24.45676872	-0.169259004	0.08470345	0.14603925	0.171427593	no	no	no	no
Dpp4	39.74451154	7.677803528	8.673359373	10.58718661	-2.620633546	2.55E-52	0.225412529	0.469126307	no	no	yes	no
Dpp7	36.21882222	34.68076662	35.95325562	37.91185597	-0.363889026	0.000192041	0.15512782	0.348024985	no	no	no	no
Dpp8	34.76633377	35.95004871	41.25389863	36.32831005	-0.180629846	0.002611146	0.231791148	0.003251802	no	no	no	no
Dpp9	19.38179094	13.28611401	14.0204682	15.30296361	-0.847240005	4.96E-40	0.193768785	0.005806522	no	no	no	no
Dpt	4.605467274	0.851056614	0.704759362	1.333607255	-3.868289053	5.57E-25	1.572630648	0.000184849	no	no	no	yes
Dpy19l1	24.22151579	30.84417442	22.25369195	26.40048047	0.124293938	0.212601789	-0.437826482	1.04E-11	no	no	no	no
Dpy19l3	4.192847305	1.900270968	3.558454543	2.293092704	-1.437116195	1.97E-15	0.987804354	0.000104398	no	no	yes	no
Dpy19l4	13.12421311	14.4005189	14.80784407	14.19942719	-0.116044701	0.202281336	0.109666711	0.308104067	no	no	no	no
Dpy30	20.03290798	35.88895617	23.15488653	33.43696578	0.645418004	2.01E-11	-0.665010977	2.46E-08	no	no	no	no
Dpyd	68.43649423	15.14859333	28.14870852	12.72545259	-2.455134044	2.97E-113	0.950279867	3.25E-13	no	no	yes	no
Dpys	76.84032861	2.650966013	13.97210607	3.803562416	-4.573336752	7.80E-12	2.091555287	0.000998771	no	no	no	yes
Dpysl2	9.571492878	7.347934833	14.01474185	8.231410167	-0.712811556	5.38E-10	1.093001954	9.74E-06	no	no	no	yes
Dqx1	13.60102541	20.27516514	45.74329517	20.33229992	0.217849814	0.150471473	1.300462405	6.71E-43	no	no	no	yes
Dr1	19.1132528	26.41371075	21.76983118	28.10064324	0.191175386	0.087533844	-0.197557184	0.018546122	no	no	no	no
Dram1	0.714941472	4.154772159	3.667417433	9.099870099	2.110376921	6.24E-17	0.025957843	0.948909301	yes	no	no	no
Dram2	40.45081357	25.98591727	42.41277612	28.04595065	-0.852555213	1.15E-12	0.733813391	3.40E-15	no	no	no	no
Drap1	51.79320748	48.50990634	39.77302653	44.22421098	-0.354582737	5.01E-07	-0.254266257	0.00015319	no	no	no	no
Drg1	21.93868937	31.71881182	24.30841817	32.03504694	0.40351445	1.74E-05	-0.45515752	0.000100276	no	no	no	no
Drg2	35.76005908	55.85202096	36.8787391	56.06111891	0.482402879	4.88E-06	-0.623704886	9.63E-07	no	no	no	no
Drosha	5.069394364	20.60356722	9.451075692	17.78911596	1.783917319	1.45E-79	-1.085016682	5.69E-24	no	yes	no	no
Dsc2	38.13509219	2.897102976	23.18157529	6.221121168	-4.002268135	1.18E-46	2.93320058	2.76E-19	no	no	no	yes
Dscc1	0.21048018	6.705543044	1.811738122	5.35216227	4.544187094	7.92E-34	-1.734928983	3.86E-11	no	yes	no	no
Dscr3	25.67042929	25.92925976	34.38221473	25.19690278	-0.275903453	0.003751554	0.508244658	3.77E-06	no	no	no	no
Dse	13.10477534	12.16381037	14.58693246	9.183299199	-0.438698484	1.08E-05	0.392121787	0.003009134	no	no	no	no
Dsg1c	5.570053671	0.371437899	2.696828465	0.576625817	-4.251875874	2.15E-24	2.711754962	9.57E-09	no	no	no	yes
Dsg2	37.47364951	24.81071832	34.53648109	25.81523166	-0.87977041	8.33E-30	0.559183686	1.97E-06	no	no	no	no
Dsn1	1.802376613	21.8268894	11.78239634	20.94343483	3.271073876	6.28E-200	-0.787473956	1.27E-22	yes	no	no	no
Dsp	44.39510318	12.13764307	34.21156519	20.12409143	-2.221316258	2.49E-61	1.608264572	2.54E-16	no	no	no	yes
Dst	12.55805258	11.96077856	25.15684904	13.42141837	-0.37825653	1.18E-06	1.189891846	2.59E-26	no	no	no	yes
Dstn	98.68879159	67.66919192	110.8198056	80.04471576	-0.679830181	1.77E-13	0.638607119	2.60E-09	no	no	no	no
Dstyk	10.24755248	8.470572251	9.915943294	6.99614796	-0.633120396	6.44E-11	0.385119531	0.001590253	no	no	no	no
Dtd1	11.10518128	39.85141049	11.33491463	31.98980846	1.657037018	1.36E-49	-1.790105358	2.43E-43	no	yes	no	no
Dtd2	10.96469552	14.7439369	9.116496956	12.86237477	0.15446086	0.010139314	-0.603055686	5.55E-12	no	no	no	no
Dtl	1.018298519	18.43493285	3.756338648	15.81713545	3.253013237	1.07E-14	-2.191559398	1.63E-76	no	yes	no	no
Dtnb	9.798063576	17.08184571	10.80291863	16.06423693	0.55223058	1.03E-22	-0.601679396	8.39E-21	no	no	no	no
Dtnbp1	29.85708257	25.6698662	26.04106804	24.81651698	-0.467317327	1.15E-08	0.094491464	0.464146555	no	no	no	no
Dtwd1	10.52811071	24.6079886	10.26026756	18.22987144	0.947333182	2.40E-19	-1.190448016	1.07E-28	no	yes	no	no
Dtwd2	4.461152821	7.648287111	4.249342549	8.059789776	0.502469295	1.45E-09	-0.74965708	5.06E-17	no	no	no	no
Dtx2	2.864907544	5.253702886	5.530059804	5.540733128	0.540317307	4.56E-05	0.220591761	0.137363657	no	no	no	no
Dtx3	3.441781686	7.891023769	12.44828282	10.76730903	0.814845865	1.77E-10	0.805237968	6.16E-05	no	no	no	no
Dtx3l	45.33243197	32.30353372	50.10581956	43.68557443	-0.784268214	9.62E-16	0.722471927	3.14E-08	no	no	no	no
Dtx4	9.002309605	22.30817917	15.28110884	17.40590011	1.012916951	9.81E-33	-0.447181137	0.000590456	yes	no	no	no
Dtymk	16.94869303	44.415257	19.88390658	42.13004053	1.207236837	7.16E-59	-1.160440642	2.86E-26	no	yes	no	no
Dus1l	58.42454179	63.19785993	45.46273498	60.32218276	-0.098175094	0.214052129	-0.465187968	4.09E-08	no	no	no	no
Dus2	8.911592455	15.74213233	8.070597869	15.39271206	0.590443048	1.86E-06	-0.869368543	4.20E-10	no	no	no	no
Dus3l	9.727596358	27.7447198	17.55020397	24.62604531	1.210027886	8.82E-52	-0.563370998	8.32E-07	yes	no	no	no
Dus4l	6.040920812	19.50050433	5.168579155	15.47584177	1.421097253	8.05E-36	-1.821452258	2.38E-67	no	yes	no	no
Dusp1	24.61007303	11.36615492	25.34515722	11.3188038	-1.433148485	2.35E-16	1.259815413	7.79E-12	no	no	no	yes
Dusp10	5.779622823	2.014894803	8.956235427	2.387676564	-1.908681207	9.83E-23	2.275579978	3.22E-22	no	no	no	yes
Dusp11	28.3972389	35.95195616	36.85713924	37.72499557	0.083728644	0.228754872	0.098741135	0.028005478	no	no	no	no
Dusp12	15.0180339	26.83326788	14.02163848	23.90516685	0.574027885	1.22E-12	-0.865259235	7.11E-23	no	no	no	no
Dusp14	1.818222258	2.254997106	7.899657185	3.483528442	0.004830806	0.981599125	1.883138594	1.77E-45	no	no	no	yes
Dusp16	25.63235775	15.66959891	22.9749743	15.72885277	-1.006983255	6.90E-49	0.643079045	1.36E-10	no	no	yes	no
Dusp19	7.939464188	7.307314368	6.722817565	7.22182505	-0.378253498	4.47E-05	-0.050134891	0.687667046	no	no	no	no
Dusp2	0.304516829	8.109137422	2.106326897	7.273125287	4.336331937	6.76E-60	-1.758755954	2.63E-21	no	yes	no	no
Dusp22	10.02569726	2.694581918	4.78312596	3.126831018	-2.253602701	8.40E-125	0.976116503	5.02E-09	no	no	yes	no
Dusp23	12.84401803	3.703562692	8.053577971	3.18662282	-2.113119724	1.44E-64	1.262226308	6.73E-14	no	no	no	yes
Dusp28	16.67402154	16.9216913	19.46553495	15.61800157	-0.279231765	0.004047914	0.303543223	0.024518547	no	no	no	no
Dusp3	37.52100992	20.10662723	31.13785867	28.92190024	-1.209739893	1.16E-36	0.73521225	4.15E-08	no	no	yes	no
Dusp6	36.78992383	16.83708615	31.68119309	17.95074267	-1.444022446	1.16E-38	1.026153316	2.76E-11	no	no	no	yes
Dusp7	7.95396322	21.41172024	7.107135527	16.60401625	1.109302256	4.63E-41	-1.457101083	2.24E-39	no	yes	no	no
Dusp8	0.415268177	1.492064524	4.419701368	1.512274823	1.339571615	7.38E-06	1.719276436	2.67E-09	yes	no	no	yes
Dusp9	0.606493241	96.92333076	63.95057398	92.28129985	7.30032048	1.68E-109	-0.82441567	0.000197603	yes	no	no	no
Dut	5.966488355	21.10574796	9.548074309	21.57839676	1.640811114	1.43E-102	-1.186459654	5.54E-31	no	yes	no	no
Dvl1	41.88515668	33.18462943	38.00054706	30.19230843	-0.619216718	7.67E-28	0.268178599	0.010160136	no	no	no	no
Dvl2	3.601744937	8.060156496	7.036281365	7.270976506	0.791359917	5.69E-10	-0.033068934	0.844700842	no	no	no	no
Dvl3	7.472667633	10.19318696	11.03343953	10.0465123	0.100059798	0.467725232	0.267287766	0.094971399	no	no	no	no
Dxo	31.83095598	25.85441117	33.29874582	30.32598036	-0.64854129	1.07E-11	0.505012022	8.13E-06	no	no	no	no
Dym	9.255264387	9.688925072	6.92770356	9.079026757	-0.241972681	0.001388302	-0.37078569	0.00011784	no	no	no	no
Dync1h1	55.3839221	66.97708345	56.28096942	65.44080798	0.115651527	0.167904641	-0.297532524	0.002425025	no	no	no	no
Dync1i2	12.99786239	14.52492619	17.06976255	14.55817605	-0.080753634	0.149452166	0.286033607	0.000363731	no	no	no	no
Dync1li1	13.74234754	31.8746069	18.45796633	28.29246057	0.986760663	6.39E-69	-0.758091824	1.15E-28	no	no	no	no
Dync1li2	18.08596965	20.26322452	21.57312699	17.52017488	-0.130748009	0.009982634	0.191587049	0.00540219	no	no	no	no
Dync2h1	2.946267271	8.519066493	4.516888126	5.866496664	1.247018815	5.00E-22	-0.84961029	1.29E-05	yes	no	no	no
Dync2li1	0.845312921	6.843806936	4.183602848	4.146125228	2.795162545	5.72E-21	-0.674275606	0.028268088	yes	no	no	no
Dynll1	15.87932261	30.12504658	31.3751912	34.12711638	0.919872546	1.43E-11	-0.147737142	0.439080083	no	no	no	no
Dynll2	50.05152369	29.29957692	26.28826956	27.89182633	-1.054009459	4.05E-55	-0.081777667	0.640402107	no	no	yes	no
Dynlrb1	56.73750865	41.22764612	46.15199932	40.97611533	-0.663987427	1.05E-09	0.157090747	0.29280745	no	no	no	no
Dynlt1a	0.658930987	4.883273224	4.185778714	4.452544336	2.798531955	1.61E-25	-0.244338003	0.232786643	yes	no	no	no
Dynlt3	60.69447989	46.091746	62.66624481	45.62598645	-0.635432932	6.88E-13	0.480346994	5.58E-09	no	no	no	no
Dyrk1a	13.35370463	21.13713574	17.26455092	19.5555801	0.376840302	5.85E-10	-0.201947891	0.000173953	no	no	no	no
Dyrk1b	10.41015417	6.631532484	14.83886836	5.586679205	-1.032696698	2.33E-12	1.329513773	1.22E-16	no	no	no	yes
Dyrk2	48.58488773	35.40730716	41.52686051	34.99017154	-0.764924739	3.23E-23	0.324980051	3.79E-05	no	no	no	no
Dyrk3	2.493090754	17.97974109	4.343864555	12.43489854	2.510464978	3.17E-73	-1.931714717	4.50E-37	no	yes	no	no
Dysf	3.790683688	5.564516873	5.053049126	4.68615206	0.311488619	0.055228318	-0.006329405	0.978915755	no	no	no	no
Dzip3	2.261949968	22.44977454	14.09902275	18.96599233	3.01661494	5.55E-155	-0.574699241	1.01E-06	yes	no	no	no
E130012A19Rik	1.550010352	23.08356732	2.985827332	14.22171615	3.576380165	1.75E-97	-2.744527593	3.97E-20	no	yes	no	no
E130308A19Rik	5.879474901	7.414510395	7.195815168	7.819914814	-0.045232159	0.675181735	0.142191503	0.212296786	no	no	no	no
E130309D02Rik	11.88014738	20.81473959	8.775085641	19.02468375	0.478310334	8.54E-09	-1.096546527	2.29E-27	no	yes	no	no
E130311K13Rik	12.97681381	6.198055718	9.659883761	5.976689696	-1.355163589	3.15E-64	0.715779671	1.65E-10	no	no	yes	no
E2f1	2.546449125	16.04288736	5.71227678	14.50579758	2.299369786	3.00E-50	-1.323722997	2.04E-23	no	yes	no	no
E2f2	3.057914328	12.89557536	8.733916518	11.56786366	1.725667209	2.55E-10	-0.397374884	0.277955269	yes	no	no	no
E2f3	5.130040504	19.48113086	7.791542964	17.28504436	1.579212255	3.23E-59	-1.17238313	3.26E-44	no	yes	no	no
E2f4	20.22179567	50.04996464	29.4122039	50.2752908	1.074727731	2.84E-54	-0.727647267	7.73E-21	yes	no	no	no
E2f5	9.080494945	32.46677332	15.89056715	27.04232975	1.597185938	2.13E-64	-0.970336785	5.53E-25	yes	no	no	no
E2f6	12.95948483	18.30931025	10.73388035	12.31910479	0.22991498	0.001237749	-0.691364891	1.05E-17	no	no	no	no
E2f7	0.447249048	4.096128322	1.147131979	1.870745866	2.805928022	2.62E-84	-1.647954823	6.65E-26	no	yes	no	no
E2f8	12.61740091	25.27928699	6.879084435	22.05998599	0.699412062	1.98E-08	-1.787251091	2.00E-80	no	yes	no	no
E330009J07Rik	14.84630298	14.05721897	17.60203796	9.877548464	-0.403219368	1.98E-07	0.456096122	0.001860938	no	no	no	no
E430018J23Rik	9.903535876	11.13469745	8.540760037	7.397562404	-0.169421579	0.27304383	-0.205402005	0.233127522	no	no	no	no
E430025E21Rik	14.24284024	17.21244889	16.12596675	16.90545882	0.044570876	0.683708721	-0.058863298	0.691223047	no	no	no	no
E4f1	10.10112385	13.5439461	10.90702151	11.74160327	0.096592929	0.282769152	-0.173265256	0.054553385	no	no	no	no
Eaf1	30.8399184	41.53915431	27.36776303	45.80191123	0.174885615	0.000687783	-0.55193304	1.26E-12	no	no	no	no
Eaf2	3.680593316	2.258443806	2.91048532	2.283598228	-1.025006115	1.70E-14	0.469981852	0.006459198	no	no	yes	no
Eapp	30.99949506	27.86891797	27.47532932	27.58296911	-0.387653688	0.000904578	0.017298882	0.922731642	no	no	no	no
Ears2	16.26442795	19.2389836	11.09095367	22.82193973	-0.011738871	0.918613014	-0.671172589	9.53E-08	no	no	no	no
Ebag9	19.55536899	20.67974996	16.58770458	19.7983236	-0.178456424	0.055181243	-0.264346725	0.004480534	no	no	no	no
Ebna1bp2	12.895305	30.11348166	12.68805165	29.0691551	1.149906887	3.74E-23	-1.357283743	7.83E-21	no	yes	no	no
Ebp	78.21532099	26.04954977	41.7343992	30.11435996	-1.858193854	1.23E-156	0.753248386	1.86E-10	no	no	yes	no
Ebpl	32.25090837	13.52865946	15.42100758	13.82212594	-1.502401005	2.20E-68	0.233977587	0.035434319	no	no	yes	no
Ecd	22.19769802	40.47774347	28.03687756	40.12628685	0.681759591	2.21E-13	-0.533372814	1.03E-06	no	no	no	no
Ece1	60.53148916	36.16537499	36.43940553	34.14135631	-0.916045383	9.51E-36	-0.027257094	0.815180289	no	no	no	no
Ece2	3.613344589	5.804273644	2.704228101	5.187455857	0.413467432	9.20E-07	-1.008199812	5.76E-17	no	yes	no	no
Ech1	130.4696918	62.76949431	90.61907764	63.04373426	-1.289535238	2.54E-39	0.539497487	7.24E-06	no	no	yes	no
Echdc1	9.690895076	5.835008499	5.49519539	6.444493409	-0.905635786	4.93E-13	-0.128881615	0.500733436	no	no	no	no
Echdc2	84.96577981	44.78654591	56.11318525	46.0074877	-1.135217842	5.69E-39	0.337045267	0.004110066	no	no	yes	no
Echdc3	34.90097834	24.55184347	30.46360984	21.28426301	-0.800386831	4.44E-13	0.413203925	0.001384259	no	no	no	no
Echs1	39.24267029	25.7681975	32.923628	27.41029689	-0.755062882	1.25E-18	0.284350647	0.009847367	no	no	no	no
Eci1	70.4848747	62.7310692	64.27323501	63.16556925	-0.284952701	0.024616112	-0.052478861	0.784789561	no	no	no	no
Eci2	84.04149604	34.60411588	42.94586322	30.82988653	-1.496516258	7.36E-31	0.302786596	0.041428634	no	no	yes	no
Ecm1	53.70369689	5.854713696	4.662796865	6.330954907	-3.546226707	3.46E-107	-0.169662612	0.588316807	no	no	yes	no
Ecm2	1.278418288	5.967867536	2.045303572	5.657808485	1.837850923	9.43E-28	-1.327232559	2.07E-10	no	yes	no	no
Ecscr	3.679687261	6.363058157	7.86223118	6.67487884	0.513266117	0.010839361	0.41220721	0.109422812	no	no	no	no
Ecsit	37.83067034	43.75424967	19.14450339	45.29706632	-0.033250544	0.601058421	-1.144668882	3.73E-26	no	yes	no	no
Ect2	1.506560989	30.32767428	13.39116161	31.36080813	4.098831826	3.14E-77	-1.138977308	3.95E-27	no	yes	no	no
Eda2r	0.408257315	1.187069938	0.959815795	4.190357839	1.172161079	0.000184473	-0.169533054	0.678457092	yes	no	no	no
Edc3	16.56774778	24.10069198	18.60748563	21.86405286	0.226956248	0.00012169	-0.254033946	8.84E-05	no	no	no	no
Edc4	19.5752182	31.95152434	27.88641161	32.26833351	0.405841047	1.27E-13	-0.096741621	0.317091887	no	no	no	no
Edem1	84.90178934	25.29183737	71.77622629	35.31254571	-2.036916405	1.48E-244	1.580760509	6.84E-101	no	no	no	yes
Edem2	35.2293039	16.81629307	37.28281787	20.25150568	-1.370826907	8.11E-51	1.267846524	9.93E-25	no	no	no	yes
Edem3	24.48896068	18.5078504	25.34943006	20.46810479	-0.67919052	1.48E-26	0.537326145	8.14E-17	no	no	no	no
Edf1	97.76903612	82.05755454	75.83605469	89.03302611	-0.25500822	0.10891511	-0.322603957	0.100718341	no	no	no	no
Ednra	4.577091648	1.570937572	1.815742284	1.914597322	-1.911920353	4.40E-59	0.391562132	0.115525527	no	no	yes	no
Ednrb	21.17080291	16.44719154	18.29374751	12.87527708	-0.701842928	5.02E-08	0.286918244	0.201278094	no	no	no	no
Edrf1	17.7246921	19.22444197	15.09768145	19.53860179	-0.153372254	0.020798875	-0.261026836	0.001193214	no	no	no	no
Eea1	26.229478	27.87883663	20.15592055	27.2810884	-0.171314538	0.008665456	-0.409306164	3.39E-08	no	no	no	no
Eed	15.08141638	29.67169327	16.33944797	27.30708849	0.781292233	2.09E-13	-0.85359532	4.34E-12	no	no	no	no
Eef1a1	217.0776919	168.0006081	237.1694604	199.9162465	-0.399547729	0.003938432	0.329950778	0.09236414	no	no	no	no
Eef1b2	46.2930114	63.49222368	62.1753683	70.53315053	0.741420015	0.00202632	-0.510896729	0.099228791	no	no	no	no
Eef1d	19.39350212	30.39728531	20.80598427	32.7149901	0.613966627	4.96E-06	-0.730641026	8.48E-06	no	no	no	no
Eef1e1	9.943565565	39.76324652	13.51072566	40.16351363	1.810545351	4.84E-56	-1.545524874	4.23E-53	no	yes	no	no
Eef1g	99.36042478	124.0438864	121.97881	138.6014518	0.668296829	0.009018017	-0.56494945	0.078277022	no	no	no	no
Eef2	200.2265275	166.309823	203.9824551	185.7969391	0.156038498	0.603235293	-0.33306686	0.363320128	no	no	no	no
Eef2k	8.835870655	25.34064753	9.631161414	19.4552307	1.299592417	4.71E-41	-1.347743773	5.57E-22	no	yes	no	no
Eefsec	25.62266569	21.45745012	14.31666632	23.62379533	-0.538214734	3.88E-15	-0.498438056	8.03E-06	no	no	no	no
Eepd1	25.84453192	3.388924255	8.996893002	5.941305431	-3.257817806	7.59E-171	1.524162402	1.07E-19	no	no	no	yes
Efcab14	13.59591097	13.0266677	11.93015964	14.1042147	-0.402802024	4.62E-08	0.022900326	0.832955671	no	no	no	no
Efcab2	3.055412134	5.976795836	3.709271994	5.095321081	0.640805611	9.62E-05	-0.54638648	0.01922884	no	no	no	no
Efcab7	1.119399729	6.471313884	2.957365678	4.522859543	2.307880786	3.18E-44	-1.076547197	3.65E-09	no	yes	no	no
Efemp1	5.196510405	0.59513508	5.769488416	0.772598217	-3.123941421	1.54E-19	2.809209314	2.95E-11	no	no	no	yes
Efemp2	3.063106531	4.712946355	6.364143341	9.100505679	0.29545019	0.048615182	0.573801057	0.009270993	no	no	no	no
Efhd2	21.931199	16.69130803	17.06155648	15.44355715	-0.712216592	2.54E-18	0.168945947	0.223021793	no	no	no	no
Efna1	43.73368125	21.31636619	34.96613034	24.23207156	-1.329370821	3.42E-19	0.806275417	4.62E-06	no	no	yes	no
Efna3	3.932190796	0.306427456	1.958346099	0.595687952	-4.172147567	1.46E-33	0.418786905	0.466120675	no	no	yes	no
Efna4	0.205702945	1.618225657	3.501671006	1.198566232	2.470936191	3.24E-12	1.319032731	3.91E-05	yes	no	no	yes
Efna5	4.173415914	0.618131583	0.868648169	0.641145685	-3.121041084	6.76E-48	0.619879837	0.090821133	no	no	yes	no
Efnb1	13.26930613	10.72478724	11.9685917	10.35844906	-0.647507082	9.68E-09	0.285053317	0.062614752	no	no	no	no
Efnb2	2.247876785	4.510055224	3.984285681	4.046442193	0.62697837	4.17E-05	-0.013443187	0.942259282	no	no	no	no
Efr3a	18.25403905	15.70791901	17.32272	16.13510423	-0.47230666	1.31E-16	0.209688443	9.48E-05	no	no	no	no
Eftud1	6.301661613	11.33903367	7.027498835	10.42791913	0.585648243	3.47E-17	-0.611603902	1.27E-12	no	no	no	no
Eftud2	11.80235603	31.96916366	12.58908668	29.49982442	1.293650996	1.39E-51	-1.3731042	5.44E-42	no	yes	no	no
Egfl7	36.74876629	38.75345609	31.40353846	34.15729345	-0.205438154	0.003244792	-0.218516241	0.020337859	no	no	no	no
Egfl8	2.116901869	4.079101627	2.217606665	3.215369197	0.608264295	0.001432526	-0.718034708	0.001701978	no	no	no	no
Egfr	109.7410295	14.35632707	33.6544828	12.29764516	-3.248250083	2.95E-97	1.318380832	1.10E-17	no	no	no	yes
Egln1	24.7076059	26.09473235	19.60771784	26.83548838	-0.207280684	0.001894667	-0.331615642	0.000814342	no	no	no	no
Egln2	50.02593922	39.60807105	42.16177352	35.11631677	-0.647805185	2.18E-13	0.192279716	0.032718436	no	no	no	no
Egln3	14.52861898	21.26848644	18.20930185	20.89589379	0.254496426	0.016332874	-0.111178506	0.427433963	no	no	no	no
Egr1	9.075163894	3.896948743	13.29567599	8.078626686	-1.555261217	3.33E-07	1.82050872	2.88E-11	no	no	no	yes
Ehbp1	12.64482479	13.00205732	12.48749822	11.41862454	-0.265590905	6.22E-05	0.045080583	0.665444893	no	no	no	no
Ehbp1l1	4.697976204	8.455808829	8.362305374	6.413174049	0.469008428	0.004616012	0.164832933	0.451604965	no	no	no	no
Ehd1	27.72058422	41.57286438	43.08818016	43.5844826	0.30671474	0.000246837	0.117717021	0.169860634	no	no	no	no
Ehd2	3.091754639	8.581250763	7.259941078	8.764803012	1.144251731	3.01E-16	-0.107470411	0.613975746	yes	no	no	no
Ehd3	56.29067983	11.18614052	16.41858152	5.41823089	-2.684654295	6.11E-85	0.690707142	0.002532596	no	no	yes	no
Ehd4	5.771157464	19.72736902	19.74989823	17.14253024	1.492013902	1.16E-57	0.092758381	0.36655005	yes	no	no	no
Ehhadh	123.6098282	16.52165418	43.03191415	25.16904095	-3.222490007	2.69E-82	1.465925478	7.38E-12	no	no	no	yes
Ehmt1	19.5734113	29.93916616	18.13448428	25.96779319	0.352567325	8.86E-16	-0.650720581	2.73E-35	no	no	no	no
Ehmt2	37.94603632	55.81612406	43.72168029	53.41797794	0.328864896	8.35E-05	-0.331014038	1.43E-05	no	no	no	no
Ei24	70.81445844	42.44501667	35.47436574	41.35860239	-0.96088653	6.29E-54	-0.260427673	0.0032443	no	no	no	no
Eid1	14.26675316	28.40864052	30.41548965	24.42129211	0.723998553	1.51E-18	0.150669857	0.346098929	no	no	no	no
Eid2	0.491014443	13.71216079	8.141945152	10.70546109	4.488270514	3.00E-82	-0.644461785	1.67E-05	yes	no	no	no
Eid2b	4.283994696	2.381489614	2.203398535	1.872551807	-1.127418499	1.43E-22	-0.032924871	0.872129378	no	no	yes	no
Eid3	7.458381255	9.517702603	6.044007247	9.549745878	-0.018978877	0.933387838	-0.484429537	0.051096949	no	no	no	no
Eif1	95.10792201	79.94170909	82.32675923	82.91312908	-0.308087928	0.026882199	-0.121599012	0.513434449	no	no	no	no
Eif1a	54.16273293	77.20029604	65.09664667	83.29369536	0.413290183	0.000748733	-0.341072752	0.014611341	no	no	no	no
Eif1ad	19.42705029	34.59463909	12.46698193	26.61895478	0.576897903	3.04E-22	-1.425391764	2.91E-66	no	yes	no	no
Eif1ax	38.1826968	69.55985105	41.85697139	66.38175319	0.852029549	8.63E-09	-0.905081256	1.81E-07	no	no	no	no
Eif1b	25.74496262	32.03542686	24.04268945	32.79537226	0.044573227	0.582293234	-0.354204333	0.00038347	no	no	no	no
Eif2a	14.38832847	25.86918034	19.42791542	23.63338486	0.697352987	1.12E-15	-0.464678853	4.61E-05	no	no	no	no
Eif2ak1	19.30551697	19.45346459	19.03201444	17.7015597	-0.253710976	0.001184671	0.035896201	0.757050089	no	no	no	no
Eif2ak2	19.32457843	20.71736333	25.89644593	18.40049874	-0.186087495	0.001725292	0.391073005	2.15E-10	no	no	no	no
Eif2ak3	13.31569386	11.64695675	26.73742486	14.08358499	-0.480007882	0.001584578	1.295693505	2.51E-24	no	no	no	yes
Eif2ak4	7.235344975	12.96415094	10.59412681	11.70923259	0.541290206	6.50E-12	-0.165238275	0.154991675	no	no	no	no
Eif2b1	26.80666683	50.00474334	27.77230684	46.61076662	0.745128742	5.03E-16	-0.892394754	3.66E-17	no	no	no	no
Eif2b2	19.06754267	28.53390464	18.48411916	25.71763142	0.333113332	0.003695898	-0.567640555	1.09E-07	no	no	no	no
Eif2b3	5.162650866	18.61299893	4.30622339	16.01902752	1.691934992	7.52E-60	-2.09727275	7.98E-53	no	yes	no	no
Eif2b4	37.39231118	42.39730273	28.93256534	40.31659077	-0.054989835	0.56121362	-0.517228186	2.80E-08	no	no	no	no
Eif2b5	39.37218609	57.37911498	35.29921059	57.23900546	0.396343452	3.65E-05	-0.746728732	1.41E-11	no	no	no	no
Eif2d	11.66864112	13.29080409	9.849616931	13.57461581	-0.043725195	0.608939986	-0.401555967	8.83E-06	no	no	no	no
Eif2s1	24.80295049	47.01018371	30.32019297	46.67251172	0.845258954	2.40E-13	-0.733122105	3.03E-08	no	no	no	no
Eif2s2	20.72008144	31.96162484	21.70109118	31.44105102	0.519482847	4.85E-07	-0.653099364	3.04E-08	no	no	no	no
Eif2s3x	70.96241954	92.27140294	67.83611975	96.95516816	0.407378432	0.012479379	-0.664031904	0.000687677	no	no	no	no
Eif2s3y	22.36639443	15.0434812	15.19330232	16.35478329	-0.634655752	0.623902979	-0.007835529	0.993027373	no	no	no	no
Eif3a	41.12880245	62.45289943	53.36220624	65.34716721	0.609063854	8.01E-06	-0.424953749	0.01818629	no	no	no	no
Eif3b	54.36971552	83.37657371	42.19637905	84.29038077	0.636382148	3.95E-05	-1.181560887	4.93E-10	no	yes	no	no
Eif3c	81.9300202	100.6347027	82.73763527	99.7633034	0.313911696	0.037518333	-0.500654456	0.008726412	no	no	no	no
Eif3d	50.28204923	74.82955844	48.14109518	75.33512307	0.544464835	0.000109254	-0.799697215	2.28E-06	no	no	no	no
Eif3e	36.62164828	57.50119773	42.8007129	58.97828539	0.758381551	0.000366018	-0.711740658	0.006310531	no	no	no	no
Eif3f	41.45332983	54.80444927	44.97072209	60.01653298	0.289775809	0.00519396	-0.385982418	0.011756231	no	no	no	no
Eif3g	62.12581599	91.37454555	66.53772096	88.21528666	0.536048741	9.28E-05	-0.632112758	0.000337862	no	no	no	no
Eif3h	55.02143204	69.11240338	62.64635598	71.78302062	0.310901138	0.07645511	-0.34712605	0.130897257	no	no	no	no
Eif3i	24.40280399	32.83091131	26.13989317	33.43956049	0.515090002	0.003614097	-0.608830685	0.00560514	no	no	no	no
Eif3j1	53.53978375	72.73370519	54.89152893	77.0500403	0.376223068	0.002331289	-0.534060005	8.45E-05	no	no	no	no
Eif3k	15.9355676	28.25201837	19.51961867	27.08466066	0.81619587	2.29E-07	-0.736092643	0.000103652	no	no	no	no
Eif3l	40.84100814	60.93431168	53.12142615	64.30104634	0.590360257	0.000212626	-0.415237279	0.044831463	no	no	no	no
Eif3m	53.24820459	77.49738528	61.89143186	77.18171012	0.655517851	0.001458917	-0.630892377	0.01261822	no	no	no	no
Eif4a1	126.714852	143.2709126	140.4978297	155.76584	0.568684663	0.036993277	-0.610025409	0.066671297	no	no	no	no
Eif4a2	82.32221373	86.88581055	95.61243897	93.64062634	0.023451261	0.865808421	-0.01794989	0.934828972	no	no	no	no
Eif4a3	43.81779638	67.37333068	43.37728971	65.84190319	0.51216613	2.74E-06	-0.722334139	1.03E-07	no	no	no	no
Eif4b	86.59952971	106.9669727	88.55309344	109.3066377	0.41193488	0.024047915	-0.577342014	0.010760825	no	no	no	no
Eif4e	33.63472216	59.50531672	32.95957426	58.65682909	0.735604699	1.77E-09	-0.949917493	4.26E-15	no	no	no	no
Eif4e2	19.18617462	26.36266158	19.89686832	24.74864799	0.209853651	3.45E-09	-0.353476051	6.50E-11	no	no	no	no
Eif4e3	3.909201424	3.150362207	4.789016979	3.046988018	-0.656654287	1.41E-06	0.770698186	0.000126326	no	no	no	no
Eif4ebp1	39.17075025	68.82306468	49.73912568	65.45489965	0.790939985	1.61E-07	-0.64990868	0.001189928	no	no	no	no
Eif4ebp2	58.84508381	37.75857877	33.49579527	43.75759315	-0.895259719	9.17E-24	-0.123419398	0.360007769	no	no	no	no
Eif4ebp3	4.990899887	2.004374383	1.656120752	1.629500413	-1.606552963	7.40E-14	-0.124880336	0.676081952	no	no	yes	no
Eif4enif1	15.12336352	30.41959191	22.09770511	29.00170985	0.779144086	1.27E-48	-0.430340749	1.62E-11	no	no	no	no
Eif4g1	121.7928867	107.1804926	108.256162	118.6026414	-0.15674756	0.323035703	-0.220467148	0.279002388	no	no	no	no
Eif4g2	81.46167626	78.95481815	84.99626137	84.10433439	0.09143575	0.663560272	-0.234525722	0.361954537	no	no	no	no
Eif4g3	16.47121538	16.71301577	12.26555747	18.69782031	-0.241459531	0.000977386	-0.374083315	4.96E-05	no	no	no	no
Eif4h	94.60142906	103.6658269	96.18144301	104.0735445	0.094430598	0.501495063	-0.289371173	0.079902189	no	no	no	no
Eif5	88.30576537	83.06330504	76.94111345	85.72869504	-0.11962734	0.402820956	-0.290205477	0.079033166	no	no	no	no
Eif5a	78.72720967	96.61756174	73.60095449	104.0140249	0.608404362	0.014083871	-0.885866696	0.002504611	no	no	no	no
Eif5a2	0.699182162	3.862545189	2.734225638	2.518735809	2.07892232	4.75E-54	-0.321523891	0.033146315	yes	no	no	no
Eif5b	20.64248758	30.33008641	19.87141294	29.70933197	0.333467914	1.05E-10	-0.592996144	6.09E-17	no	no	no	no
Eif6	47.63448978	65.33794513	59.73520817	63.38713232	0.338782061	0.007597965	-0.221837307	0.158963538	no	no	no	no
Elac1	8.678449864	8.962583537	4.00885471	8.342749741	-0.288529554	0.002593855	-1.009995437	1.65E-10	no	yes	no	no
Elac2	22.09674631	44.52308168	12.64234985	41.11161461	0.84367087	7.28E-15	-1.823990005	2.17E-44	no	yes	no	no
Elane	0.195374694	7.686476769	10.18101774	8.986473919	4.550466458	4.68E-13	0.479581932	0.435015608	yes	no	no	no
Elavl1	19.01440411	30.98201034	21.82375265	31.34894962	0.507024424	7.60E-11	-0.499368318	2.67E-10	no	no	no	no
Elf1	17.33145842	18.2745661	26.44779448	17.29590483	-0.228474971	0.000248609	0.627468011	4.81E-23	no	no	no	no
Elf2	27.07164256	28.09696475	28.802369	26.8529495	-0.222882938	4.25E-05	0.113077054	0.008836674	no	no	no	no
Elf3	1.25563308	12.61129416	24.03676911	10.70980831	2.980759084	1.48E-81	1.036598662	4.04E-07	yes	no	no	yes
Elf4	1.217622826	3.586077521	4.170755477	3.068850929	1.181819968	2.68E-17	0.378861836	0.068597254	yes	no	no	no
Elk1	3.967903426	6.125144941	7.430030813	6.405322284	0.297315607	0.001711609	0.412371231	4.18E-06	no	no	no	no
Elk3	8.062911022	6.054322586	7.154200952	5.26000905	-0.754193622	1.13E-07	0.38831404	0.020935984	no	no	no	no
Elk4	42.50415572	26.09979451	31.69825972	23.95736807	-0.998137966	1.74E-33	0.371650135	0.001372481	no	no	no	no
Ell	22.81671437	17.19465644	23.93629406	17.5987319	-0.734188954	6.21E-31	0.608972785	3.36E-11	no	no	no	no
Ell2	33.42762092	17.40333496	30.78992673	14.08827518	-1.236839334	1.24E-38	0.908479258	4.50E-19	no	no	yes	no
Ell3	5.559191169	3.388081873	12.57553207	5.787125537	-1.002984529	3.00E-07	1.932301826	2.65E-17	no	no	no	yes
Elmo1	0.722346239	2.516815858	3.187343373	2.193964646	1.449669256	2.62E-25	0.472798155	0.013901397	yes	no	no	no
Elmo2	6.48293575	10.0768314	27.68681968	10.62353555	0.302894434	0.001259231	1.111567089	1.89E-08	no	no	no	yes
Elmo3	28.74027431	6.897037201	26.52922712	8.087259231	-2.403940409	7.66E-106	2.064348749	8.95E-46	no	no	no	yes
Elmod2	17.80264628	10.41384866	15.0687419	8.371813631	-1.083315755	1.52E-65	0.647643501	6.80E-17	no	no	yes	no
Elmod3	10.94982245	6.935083773	7.660416629	7.188795681	-0.901096475	7.22E-19	0.189404634	0.198314496	no	no	no	no
Elmsan1	7.826599153	16.24231148	15.0731752	15.21078567	0.736428266	3.84E-15	0.00993784	0.9502647	no	no	no	no
Eln	2.812187329	9.847670981	5.385565544	3.92515104	1.603291252	0.000113964	-0.670556876	0.156638668	yes	no	no	no
Elof1	51.19387794	48.9951806	42.63307582	50.15998551	-0.299479674	0.000113649	-0.177983222	0.089257353	no	no	no	no
Elovl1	45.52972966	38.35639238	41.45189778	38.11089465	-0.521955216	1.43E-08	0.191295967	0.068459833	no	no	no	no
Elovl2	135.7552204	75.72626038	107.9745986	80.01326522	-0.992728937	1.19E-25	0.451930126	1.57E-05	no	no	no	no
Elovl3	47.28990519	0.098810065	0.075270352	1.001556203	-8.673737598	4.79E-41	-0.397504366	0.636990755	no	no	yes	no
Elovl5	133.6305312	50.97814563	55.01539493	57.85671168	-1.609393124	1.61E-105	0.125191162	0.15216551	no	no	yes	no
Elovl6	60.06725208	42.50118161	40.6496976	45.61410962	-0.738904243	3.64E-08	-0.025466915	0.887123384	no	no	no	no
Elovl7	0.518686895	14.64213649	17.85252883	17.08085248	4.489152218	8.92E-243	0.395000043	0.000235038	yes	no	no	no
Elp2	17.16399118	38.80306875	19.90787594	33.57615687	1.025707894	2.03E-27	-0.996011906	2.27E-18	yes	no	no	no
Elp3	20.18583035	47.66858803	34.17331096	43.20847846	1.060338847	3.06E-25	-0.489846786	4.13E-05	yes	no	no	no
Elp4	13.49521873	10.81669116	8.893036077	10.0198218	-0.596838122	3.87E-14	-0.198595612	0.104511889	no	no	no	no
Elp5	19.95774766	37.92602897	26.55375787	31.05867583	0.715091366	3.27E-09	-0.488118226	0.000269362	no	no	no	no
Elp6	5.878298596	11.9476485	5.813200002	9.610701382	0.718911847	2.19E-08	-0.912207955	6.40E-10	no	no	no	no
Eltd1	13.791568	7.951742072	7.632780113	7.446975832	-1.104324649	1.26E-14	0.072565356	0.709450353	no	no	yes	no
Emb	0.715476374	1.569496499	3.338484152	2.260305777	0.64521852	0.000268553	1.2968737	2.01E-09	no	no	no	yes
Emc1	14.64179201	18.73586922	11.20703775	17.75227222	0.077955329	0.162451356	-0.653536534	2.46E-30	no	no	no	no
Emc10	37.14239108	32.42707454	28.94944758	26.85699968	-0.501247513	1.76E-10	-0.074926353	0.441656507	no	no	no	no
Emc2	35.13831634	41.56158026	33.81261271	39.00696343	0.088350165	0.573047256	-0.324222396	0.079833153	no	no	no	no
Emc3	36.77549595	31.14290711	32.27648632	32.73021337	-0.490416493	8.45E-16	0.103330489	0.164169927	no	no	no	no
Emc4	52.7832592	49.48468433	39.66338841	46.77288332	-0.295079568	6.56E-05	-0.318927224	0.001236818	no	no	no	no
Emc6	67.63643971	60.13047868	51.51736084	62.84757174	-0.382329563	1.62E-09	-0.224975307	0.007505162	no	no	no	no
Emc7	57.58873418	48.42010185	47.65771195	49.50773215	-0.447287701	1.90E-07	-0.037079308	0.789010398	no	no	no	no
Emc8	13.98891096	20.29670945	9.922282867	19.0312302	0.249303337	4.49E-06	-0.949287942	1.07E-33	no	no	no	no
Emc9	17.68611946	10.56910821	12.69137295	8.615023305	-1.033475671	9.52E-28	0.341843914	0.040465373	no	no	yes	no
Emcn	1.652789205	6.308149625	4.870726947	4.791837005	1.624145037	2.24E-26	-0.255619538	0.205926322	yes	no	no	no
Emd	14.05349759	20.18148443	14.86515177	17.84912298	0.241922471	0.015871147	-0.343689749	7.69E-05	no	no	no	no
Eme1	0.411039065	25.8653397	5.574966577	23.11288148	5.581368101	9.22E-182	-2.064474576	3.14E-45	no	yes	no	no
Eme2	4.57665037	5.429336096	5.072671155	4.831738335	-0.052780867	0.688598028	0.008833127	0.958020733	no	no	no	no
Emg1	55.60649028	68.63187322	50.20357128	73.12951969	0.261210977	0.057514834	-0.615713061	0.000136797	no	no	no	no
Emid1	0.318478963	1.717077232	1.283463768	6.654425984	2.036250004	1.93E-12	-0.186766002	0.500733436	yes	no	no	no
Emilin1	19.69770335	12.50289657	22.55096979	11.82656156	-0.999476601	1.00E-14	0.960289421	1.42E-05	no	no	no	no
Emilin2	3.807719553	4.593397266	7.359973643	4.216734882	-0.149725512	0.416585687	0.890288731	1.23E-05	no	no	no	no
Eml2	7.674953009	15.03233657	10.40414464	12.5951925	0.739920202	1.81E-06	-0.463009851	0.002790049	no	no	no	no
Eml3	15.91250912	16.03169318	13.27480484	13.28603535	-0.320141899	0.000418862	-0.126407704	0.142992298	no	no	no	no
Eml4	22.96640349	43.98309939	31.82921497	42.90445196	0.695005821	1.19E-34	-0.419350908	5.85E-12	no	no	no	no
Eml5	4.844437223	8.996012796	7.367626459	7.159321446	0.554664794	1.81E-07	-0.145185129	0.194103048	no	no	no	no
Emp1	2.47796251	22.42406975	27.95283797	24.02988511	2.876231413	7.40E-83	0.412392685	0.009317421	yes	no	no	no
Emp2	6.584060082	20.46885319	40.47629305	36.39966494	1.324387535	9.77E-27	1.075933901	1.47E-14	yes	no	no	yes
Emp3	3.055542584	4.641902835	5.946779458	4.533912616	0.267743315	0.188941377	0.492937003	0.026006674	no	no	no	no
Emr1	7.916116168	17.00802241	17.98836504	9.896017632	0.898018059	5.59E-07	0.132667448	0.574918554	no	no	no	no
Emr4	3.610008898	5.148162251	4.47275159	2.07474412	0.249454055	0.142612086	-0.13255692	0.64505846	no	no	no	no
Emx1	0.024349655	5.776929829	2.035524621	10.47882133	7.009089919	2.00E-18	-1.226940757	0.007445836	no	yes	no	no
Enah	0.334916201	2.920861947	5.595103037	5.055588403	2.784111325	3.07E-28	1.022231858	0.007380239	yes	no	no	yes
Enc1	3.48751768	3.877028093	8.773585126	5.272210648	-0.237631697	0.161165973	1.315122314	3.93E-07	no	no	no	yes
Endod1	3.811430329	7.359845373	8.233825236	6.12031358	0.556433289	0.001277348	0.345962917	0.094389734	no	no	no	no
Endog	21.60327585	19.91177114	14.49506299	20.49997774	-0.373811162	0.014958572	-0.430932352	0.077784728	no	no	no	no
Endov	4.868756395	6.086520696	5.276953102	4.607351054	0.020726974	0.835865679	-0.067139018	0.614936227	no	no	no	no
Eng	34.48995995	12.79338028	12.21461627	10.98127779	-1.802748811	1.57E-64	0.09435084	0.639697435	no	no	yes	no
Engase	5.143149107	4.759427078	2.662084677	4.091714332	-0.448873456	0.000363329	-0.692460645	5.19E-10	no	no	no	no
Enho	64.80827938	1.120135274	11.99294985	1.531808978	-6.285520412	2.37E-294	3.248539296	4.39E-12	no	no	no	yes
Enkd1	0.719639235	5.572380464	1.427267831	4.719007561	2.592089632	1.90E-34	-1.790777578	3.36E-16	no	yes	no	no
Eno1	5.721712664	17.57265076	6.524366156	14.83806226	1.53314761	2.34E-27	-1.517942005	4.03E-30	no	yes	no	no
Eno3	6.464634796	16.19567277	9.497381924	19.96925948	1.019291711	2.07E-17	-0.656688987	7.10E-05	yes	no	no	no
Enoph1	5.354341829	33.56036724	15.23041578	27.72245328	2.422468823	1.04E-88	-1.059898934	4.03E-16	no	yes	no	no
Enox2	10.63947347	8.203149011	7.879480221	6.837216067	-0.629587303	2.58E-09	0.011226106	0.956674784	no	no	no	no
Enpep	51.23182716	10.34347005	26.23591181	10.37940679	-2.619609601	4.32E-175	1.427127213	5.06E-10	no	no	no	yes
Enpp1	13.60511101	11.72266403	9.353438155	11.2315878	-0.443672127	0.000181471	-0.263708854	0.051245667	no	no	no	no
Enpp2	22.18165655	1.181790278	4.032476439	1.200062902	-4.511868	5.92E-66	1.739709261	0.000109362	no	no	no	yes
Enpp3	15.22905905	0.619669362	3.710853715	2.101844396	-4.853304995	7.53E-44	2.425584327	7.59E-08	no	no	no	yes
Enpp4	17.62087965	24.18335426	29.16336694	21.71137358	0.160392274	0.11087052	0.368189565	0.000261581	no	no	no	no
Enpp5	14.98198983	13.10624637	23.53606652	13.41926974	-0.517402836	1.31E-05	0.96161873	1.66E-16	no	no	no	no
Ensa	38.08226083	38.23906996	45.08610147	36.65715586	-0.281405821	2.35E-07	0.312427149	5.41E-08	no	no	no	no
Enthd2	8.015836207	8.297565931	8.763782554	8.063309972	-0.289887795	0.003614097	0.23008337	0.079645929	no	no	no	no
Entpd1	4.239834741	16.93446453	14.78507787	13.7342065	1.732097801	5.17E-59	-0.106944071	0.449806896	yes	no	no	no
Entpd2	4.275309703	4.536466209	5.328861186	2.607744671	-0.172493482	0.328547182	0.308927858	0.273067524	no	no	no	no
Entpd4	30.52914637	27.59134107	22.3214456	22.29824685	-0.407177222	6.64E-10	-0.239656307	0.022525841	no	no	no	no
Entpd5	83.86290492	33.02753925	57.19756131	36.56146159	-1.597642867	1.02E-142	0.842359514	1.03E-20	no	no	yes	no
Entpd6	6.619422111	19.2256478	6.651988446	15.48932072	1.267348998	7.06E-50	-1.416525961	2.17E-58	no	yes	no	no
Entpd7	5.207914781	4.889321456	6.925798075	5.81074951	-0.393448742	0.00150386	0.63664088	9.31E-09	no	no	no	no
Entpd8	76.15249197	9.960940047	34.75150418	14.79592148	-3.266177378	1.30E-208	1.9044089	9.80E-34	no	no	no	yes
Eny2	28.2410196	28.46382076	31.35371313	26.52283421	-0.195156705	0.04906395	0.150863896	0.063844516	no	no	no	no
Eogt	5.144434716	11.79847646	11.84347801	14.90475114	0.89855143	2.12E-16	0.101945339	0.493262254	no	no	no	no
Ep300	16.37045422	22.32547218	22.2528541	22.66989634	0.15692232	0.037495417	0.078974015	0.378148248	no	no	no	no
Ep400	20.56805717	30.77595217	19.77641793	29.2432062	0.306591087	9.83E-10	-0.565052074	3.78E-17	no	no	no	no
Epas1	58.95784497	12.31153052	19.3048218	11.14898028	-2.595609269	3.99E-122	0.768385032	0.001757942	no	no	yes	no
Epb4.1	32.54124334	25.77516756	26.55005924	25.66697658	-0.575366574	1.27E-08	0.072745515	0.56009241	no	no	no	no
Epb4.1l1	0.670824979	10.5717722	11.36070411	13.34249897	3.662124303	8.40E-228	0.211912825	0.09797914	yes	no	no	no
Epb4.1l2	13.99749985	21.75847492	21.18250871	19.22997407	0.354989957	3.02E-08	0.068316058	0.410222696	no	no	no	no
Epb4.1l3	1.33296284	23.33730209	14.12756313	7.48699722	3.940223223	3.84E-151	-0.690794812	0.028436353	yes	no	no	no
Epb4.1l4a	0.511198202	5.728749103	3.123109644	7.504428189	3.131602628	1.33E-70	-0.7339831	0.025328512	yes	no	no	no
Epb4.1l4b	59.39658547	5.464098565	17.60625786	9.056043873	-3.774359174	2.20E-132	1.763534272	4.72E-08	no	no	no	yes
Epb4.1l5	16.62205281	17.84667936	23.79943771	19.17367244	-0.132721499	0.01906357	0.452567564	9.56E-12	no	no	no	no
Epb4.2	0.193923609	8.79843362	8.6218684	4.226282687	5.014398908	3.29E-27	0.037846174	0.956910195	yes	no	no	no
Epc1	12.92345975	21.06740127	20.79836221	18.7199631	0.426867728	3.03E-15	0.065747543	0.38696083	no	no	no	no
Epc2	11.24089355	16.50345499	16.82389874	15.02717596	0.256823492	0.001838196	0.123692763	0.146532202	no	no	no	no
Epcam	0.735569411	1.2431199	16.15592979	10.18628032	0.26035877	0.493878766	3.672777992	6.58E-18	no	no	no	yes
Epg5	19.53729073	14.54866347	11.99324456	14.61128706	-0.703037312	5.91E-49	-0.192172037	0.005506303	no	no	no	no
Epha1	41.72768658	9.307315755	32.70581144	18.80690969	-2.54400392	3.54E-84	1.959997634	5.62E-36	no	no	no	yes
Epha2	12.70029319	3.466179522	10.03748642	5.977130169	-2.198940971	3.86E-24	1.600864571	3.35E-06	no	no	no	yes
Epha8	0.002412036	3.267474572	0.008161959	0.039343098	8.398115362	8.13E-21	-6.349983759	1.41E-32	no	yes	no	no
Ephb4	23.41343911	34.20781061	32.92772836	28.58272833	0.304604583	0.000333729	0.006344695	0.948635699	no	no	no	no
Ephb6	6.238638885	1.150670174	1.846165485	0.837469241	-2.894593341	4.64E-49	0.941239362	0.001886796	no	no	yes	no
Ephx1	109.7390062	12.63538548	30.43466753	21.33312557	-3.364047292	1.09E-53	1.255024232	0.000273381	no	no	no	yes
Ephx2	112.9729458	38.00460428	65.7558613	37.92417995	-1.753365939	8.87E-28	0.760372818	5.46E-05	no	no	yes	no
Epm2aip1	28.39418786	37.76126265	44.69961882	36.23273422	0.139151462	0.099822635	0.316572521	3.36E-05	no	no	no	no
Epn1	53.46057054	39.57225175	37.22590597	36.76615394	-0.673853338	3.30E-27	-0.048013382	0.658888855	no	no	no	no
Epn2	11.52300593	13.35838217	12.22433181	12.4262796	-0.117347259	0.078743387	0.035972668	0.883812938	no	no	no	no
Epor	2.070116866	6.263576684	5.55430159	3.409991637	1.291794137	1.32E-05	-0.068862461	0.884581688	yes	no	no	no
Eppk1	16.13863907	35.04630488	19.65718296	30.1285203	0.860705399	2.79E-24	-0.781355109	0.000144945	no	no	no	no
Eprs	47.08561907	64.69690548	46.38252861	61.09613303	0.478300592	0.002045874	-0.692750753	0.000199962	no	no	no	no
Eps15	30.94548811	37.90704225	37.81909284	39.74208705	0.089666563	0.301308046	0.004687598	0.96669108	no	no	no	no
Eps15l1	8.904500846	20.97051019	16.54485252	19.40982701	0.954012164	1.07E-52	-0.253227253	0.001451691	no	no	no	no
Eps8	2.194945994	6.003292584	25.74093558	11.51375116	1.182941483	1.36E-11	2.123517341	9.68E-26	yes	no	no	yes
Eps8l2	34.4600535	29.40389088	67.51062627	38.21829261	-0.492059877	0.00011835	1.268129146	2.27E-47	no	no	no	yes
Epsti1	1.781394014	4.643359891	5.285977289	2.893938578	1.097562952	9.48E-12	0.277954645	0.174991141	yes	no	no	no
Ept1	40.27411923	41.78217778	28.34887199	41.40537049	-0.204590096	0.000245854	-0.503544133	5.72E-16	no	no	no	no
Eral1	24.27217437	35.41880365	22.23674913	32.21474756	0.254773149	5.07E-05	-0.577598748	3.18E-13	no	no	no	no
Erap1	40.8131443	24.53558286	29.85402983	28.80348127	-0.975475181	2.48E-29	0.318612332	0.00404631	no	no	no	no
Erbb2	1.147147359	10.46368837	9.383040653	14.07050765	2.859565792	1.97E-125	-0.035269926	0.863761439	yes	no	no	no
Erbb2ip	42.15895595	36.02832229	49.91392084	38.90480431	-0.452858899	6.99E-08	0.496817558	1.57E-09	no	no	no	no
Erbb3	81.91937088	33.52592153	57.96986246	37.63452356	-1.59781849	1.56E-82	0.880741059	4.92E-11	no	no	yes	no
Erc1	23.36718678	8.733494775	13.59309154	11.38963439	-1.747921035	2.06E-139	0.771872949	8.51E-11	no	no	yes	no
Erc2	4.088238268	2.989427894	6.31583156	3.331323515	-0.738720171	2.35E-12	1.15944294	1.47E-11	no	no	no	yes
Ercc1	3.889505948	12.26817698	6.768193063	10.99932415	1.372519303	2.84E-26	-0.706397036	1.70E-07	yes	no	no	no
Ercc2	11.84300329	27.40168892	15.53428033	22.32617757	0.915183112	3.44E-32	-0.716256346	2.74E-18	no	no	no	no
Ercc3	14.43933575	17.92776393	11.47549958	17.40507991	0.053139386	0.631181572	-0.543457106	7.29E-05	no	no	no	no
Ercc4	5.550089137	6.442555561	4.905311854	5.379537677	-0.105863323	0.165092362	-0.248695992	0.025588105	no	no	no	no
Ercc5	15.81709059	14.31228559	14.66261313	12.97759513	-0.44049188	3.85E-09	0.125187649	0.412597898	no	no	no	no
Ercc6	10.05483139	11.63874272	11.22335755	11.45744379	-0.082388569	0.207140183	0.042244698	0.709958816	no	no	no	no
Ercc6l	0.746417011	29.06605692	11.36246261	32.47254554	3.582920212	4.69E-13	-1.242207622	4.41E-39	no	yes	no	no
Ercc6l2	13.92558592	23.05423613	14.60655656	20.86650771	0.445131562	1.40E-14	-0.579644013	2.14E-24	no	no	no	no
Ercc8	5.59680018	14.81849547	5.163884063	12.30887574	1.108484246	1.24E-24	-1.415528974	5.73E-29	no	yes	no	no
Erf	12.58142601	24.01987623	17.89146662	20.31688694	0.632098543	2.26E-09	-0.324902746	0.000431391	no	no	no	no
Erg	4.830319227	3.276353665	2.607321635	2.667601304	-0.880074233	7.71E-10	-0.16683575	0.443965569	no	no	no	no
Ergic1	26.79997052	33.97701483	26.36981215	35.86312811	0.150963495	0.027489759	-0.375265927	1.95E-06	no	no	no	no
Ergic2	20.77459443	18.79278168	22.29549258	21.27321139	-0.390422235	7.50E-06	0.280594076	0.004111903	no	no	no	no
Ergic3	60.95216977	42.66122177	51.68524729	42.03444827	-0.769511122	1.07E-36	0.333670517	9.73E-06	no	no	no	no
Erh	32.915899	83.0695466	41.54328322	80.24097688	1.325445166	6.82E-21	-1.189864187	4.01E-12	no	yes	no	no
Eri1	9.096777781	27.13000774	15.58750615	29.0907336	1.303183061	8.46E-65	-0.714124085	7.44E-21	yes	no	no	no
Eri2	7.864926703	16.15909766	9.043589699	17.20642162	0.746588038	1.23E-16	-0.730420672	4.63E-18	no	no	no	no
Eri3	15.7408793	22.36305553	19.56125568	19.06129436	0.246121123	2.32E-05	-0.136960747	0.056375097	no	no	no	no
Erich1	5.231372983	7.824712153	7.205347047	7.332988313	0.284615145	0.015261357	-0.02865696	0.864083617	no	no	no	no
Erlec1	17.64722252	13.20058415	17.75263679	13.32579903	-0.720049659	5.43E-13	0.526028264	9.61E-11	no	no	no	no
Erlin1	45.69515138	30.3933832	34.90134243	41.48994097	-0.861588949	9.93E-85	0.264895624	0.000498304	no	no	no	no
Erlin2	31.40011129	35.09649355	43.12951561	38.14739267	-0.118653899	0.001230292	0.384741059	1.43E-10	no	no	no	no
Ermap	0.835551993	13.18167862	12.9906767	7.2592419	3.56530326	2.34E-18	0.084451543	0.893975599	yes	no	no	no
Ermard	5.809643016	6.324997829	5.019041041	5.700230297	-0.184870353	0.069396398	-0.221436541	0.03189897	no	no	no	no
Ermp1	19.83002206	20.91390263	22.56621889	22.08032311	-0.210592726	4.27E-06	-0.024080489	0.751109245	no	no	no	no
Ern1	36.0762532	15.85518118	20.4743866	19.65362166	-1.506292071	1.62E-75	0.484918842	7.82E-07	no	no	yes	no
Ero1l	22.03254947	43.56042692	40.24603744	40.30420532	0.767250301	1.81E-22	-0.08439143	0.289553477	no	no	no	no
Ero1lb	41.30974376	8.27365608	24.76953308	12.22201451	-2.605624981	2.20E-171	1.656719114	1.73E-65	no	no	no	yes
Erp29	18.69014866	20.80487642	19.28151884	21.900389	-0.047505777	0.503004991	-0.116462212	0.173311618	no	no	no	no
Erp44	30.92593494	23.58190135	38.05954246	28.38832643	-0.66010015	1.40E-11	0.764069624	8.76E-13	no	no	no	no
Errfi1	156.4247336	24.73006753	79.22763599	41.57627763	-2.967520025	1.92E-54	1.737349415	1.11E-15	no	no	no	yes
Esam	15.13764998	11.68142269	13.40572994	12.41371903	-0.671152589	6.12E-08	0.32985809	0.065444508	no	no	no	no
Esco1	17.58222104	18.32140649	26.42972257	22.38680883	-0.240677093	0.015726538	0.621792912	6.18E-27	no	no	no	no
Esco2	0.680717061	34.32459567	8.257314847	45.59271721	5.358877192	8.81E-163	-2.000572876	8.66E-74	no	yes	no	no
Esd	50.05996346	40.61823686	42.1947661	41.28564095	-0.265684953	0.170716251	-0.163029284	0.52693421	no	no	no	no
Esf1	14.30166481	41.93218327	19.96510175	40.53266298	1.368096076	2.76E-77	-1.067081274	1.20E-30	no	yes	no	no
Esm1	0.093085011	4.597643066	5.830705369	10.26613569	5.227467262	2.40E-41	0.510333753	0.141539303	yes	no	no	no
Espl1	0.27908334	34.01828557	4.121295689	28.29029583	6.605835456	0	-2.942355693	4.62E-256	no	yes	no	no
Espn	0.319931859	8.102984131	10.29926279	8.744342876	4.202947358	5.58E-135	0.512750288	0.003447885	yes	no	no	no
Esr1	25.91124826	0.91833236	1.612602142	2.525320149	-5.08235161	1.09E-120	0.839004274	0.012659549	no	no	yes	no
Esrp2	72.10637263	48.69135893	65.98560911	48.43791353	-0.846794451	1.13E-57	0.504594764	1.35E-09	no	no	no	no
Esrra	17.44727907	22.26738367	17.90642728	19.98992546	0.059394588	0.492817388	-0.213913007	0.154938697	no	no	no	no
Esrrg	3.302661103	1.156977404	0.47642697	0.099701499	-1.882343591	0.00015766	-0.921895371	0.121035144	no	no	yes	no
Esx1	0.015532972	6.790302347	0.646753613	1.896832164	7.530036028	1.50E-18	-2.327684376	0.000288956	no	yes	no	no
Esyt1	15.89187081	9.117122851	16.57825582	8.982440154	-1.11060832	1.19E-37	0.981817771	1.41E-21	no	no	yes	no
Esyt2	17.31068277	20.96029282	27.43991288	21.70638047	0.011700818	0.861088418	0.464635902	3.45E-16	no	no	no	no
Etaa1	8.575947173	16.54939231	10.66638872	16.28421038	0.640265823	6.43E-15	-0.52208458	3.10E-09	no	no	no	no
Etf1	51.56508417	72.02627165	60.77604633	76.25879816	0.418563855	0.000239924	-0.386045063	0.008662765	no	no	no	no
Etfa	68.39703499	54.24358234	63.17144382	56.23832755	-0.326128455	0.080500245	0.003650488	0.989681955	no	no	no	no
Etfb	121.3349744	82.55958626	85.80648651	83.57396959	-0.605358881	0.000176127	-0.102817495	0.66026012	no	no	no	no
Etfdh	36.7458739	22.36810535	31.4754821	23.25152014	-0.891636259	6.98E-19	0.461885445	0.000562346	no	no	no	no
Ethe1	37.61035019	25.97992588	38.03313517	30.25764464	-0.770673806	1.46E-13	0.578732927	9.53E-06	no	no	no	no
Etl4	4.343871352	7.026660809	9.138836906	3.47346075	0.374682862	0.005553413	0.504193085	0.000216	no	no	no	no
Etnk1	28.0803744	26.81411746	31.43309216	26.86769792	-0.312825529	0.000243995	0.275131393	0.002110413	no	no	no	no
Etnk2	44.76837888	3.689888756	14.86710626	8.326568498	-3.973459972	1.66E-48	2.084196937	1.41E-10	no	no	no	yes
Etnppl	48.11409644	5.25893796	7.856079642	7.83071106	-3.477160412	3.98E-29	0.657630242	0.095648615	no	no	yes	no
Etohi1	16.8859463	24.40981855	17.22604288	24.49539896	0.220900463	0.082670376	-0.38040407	0.001599315	no	no	no	no
Ets1	19.72107778	10.66527016	13.91419661	8.965259102	-1.193127963	1.31E-39	0.492146348	0.000780774	no	no	yes	no
Ets2	22.17778084	43.88906243	49.54579591	47.09771622	0.763096908	2.09E-19	0.206260974	0.037297184	no	no	no	no
Etv3	9.619545864	7.712498881	10.89475433	8.106081528	-0.656658528	2.26E-14	0.631494308	2.45E-09	no	no	no	no
Etv5	7.158295245	2.588658599	3.87155645	2.539870805	-1.813103932	5.83E-43	0.731010182	1.57E-05	no	no	yes	no
Etv6	13.94878425	12.41386144	11.01555717	12.63530426	-0.505130382	9.01E-08	-0.035792592	0.810508307	no	no	no	no
Eva1a	73.71733898	19.70612339	28.75459174	29.4088805	-2.194239449	6.27E-143	0.638626021	8.75E-07	no	no	yes	no
Eva1b	7.892809602	11.09615458	19.16692587	10.97352239	0.139692109	0.417111391	0.909153147	8.97E-09	no	no	no	no
Evc	4.651157205	8.402980135	4.495850199	5.736792341	0.611013247	0.047323928	-0.766761826	0.028544739	no	no	no	no
Evc2	3.002351339	14.3681248	4.42920557	11.21270637	2.018341126	2.51E-09	-1.508654628	7.82E-06	no	yes	no	no
Evi2a	3.319668127	6.700163765	8.436060887	7.04325637	0.646606129	1.25E-06	0.484947237	0.001294468	no	no	no	no
Evi2b	2.648993844	4.848887892	5.443788041	4.71517619	0.512579439	0.001164652	0.311884576	0.083000202	no	no	no	no
Evi5	64.05305226	46.2956954	69.96005444	51.75796925	-0.687063919	2.22E-30	0.611995518	1.45E-15	no	no	no	no
Evi5l	2.378635078	1.342095943	3.894787477	1.187129344	-1.147742202	6.79E-17	1.704801685	9.83E-24	no	no	no	yes
Evl	1.138644916	8.70021417	6.381926489	6.806709139	2.673913603	1.82E-63	-0.375628155	0.029574235	yes	no	no	no
Ewsr1	33.40598312	55.4540257	41.51073525	52.71912539	0.607073762	3.20E-11	-0.499305913	6.71E-06	no	no	no	no
Exd1	8.048608984	2.261225412	2.859843517	1.503755493	-2.130174395	8.26E-90	0.472971072	0.018806337	no	no	yes	no
Exd2	9.170064353	12.17809472	12.18907702	13.87304262	0.107169261	0.06374909	0.118912021	0.090101959	no	no	no	no
Exo1	0.301291733	20.3698648	2.046739741	19.44591221	3.738894932	6.84E-09	-3.217051516	4.65E-100	no	yes	no	no
Exo5	6.369458092	15.2328533	13.32710464	12.95254473	0.915163236	9.88E-13	-0.082377346	0.555921495	no	no	no	no
Exoc1	5.921020765	10.38541619	7.312535552	9.597555373	0.538784385	4.19E-16	-0.429706116	7.64E-08	no	no	no	no
Exoc2	9.80073632	17.46145686	11.27398842	15.29754872	0.58073989	3.00E-13	-0.568738334	8.80E-10	no	no	no	no
Exoc3	22.350334	18.12328734	18.99767942	18.7889617	-0.574548919	1.28E-11	0.131531686	0.268299619	no	no	no	no
Exoc3l	5.96761321	2.471253328	2.056791092	1.980875526	-1.588732436	9.23E-35	-0.13258257	0.612583439	no	no	yes	no
Exoc3l4	0.864673374	13.71836655	45.67584852	26.47021177	3.638688607	1.95E-116	1.830478527	1.55E-34	yes	no	no	yes
Exoc4	8.080829419	14.39831236	13.472925	16.26458147	0.558562282	3.45E-18	-0.007725659	0.944177562	no	no	no	no
Exoc5	10.40080843	12.72485101	13.1897707	13.12124835	0.011327295	0.915844007	0.138779467	0.08068173	no	no	no	no
Exoc6	16.87363385	39.16321866	27.84763988	35.3258695	1.05999101	3.27E-16	-0.515263296	0.00230545	yes	no	no	no
Exoc6b	5.947401529	6.512766508	10.59462378	9.602597773	-0.187908308	0.023334876	0.830553034	1.03E-15	no	no	no	no
Exoc7	12.02721799	8.715934193	8.555151208	8.09472724	-0.773748103	5.88E-27	0.078578961	0.477362028	no	no	no	no
Exoc8	14.26715264	18.64604129	15.06360213	17.28981203	0.070691301	0.298817024	-0.192031824	0.021541874	no	no	no	no
Exog	2.602254226	8.044445306	5.428099332	7.050861589	1.296427425	7.77E-29	-0.446562836	0.000962863	yes	no	no	no
Exosc1	7.588453998	20.7650709	6.339161242	18.67493819	1.18233997	1.03E-36	-1.607004751	5.89E-57	no	yes	no	no
Exosc10	16.45497345	36.1809678	21.39396488	35.98774395	0.941021414	1.39E-17	-0.737397399	8.60E-09	no	no	no	no
Exosc2	17.54039228	54.42984629	15.31072524	50.51135834	1.454911056	3.52E-49	-1.820850471	5.45E-62	no	yes	no	no
Exosc3	16.85256242	28.66907302	19.35191358	27.50666496	0.505536084	2.19E-09	-0.508830068	6.09E-08	no	no	no	no
Exosc4	26.31526159	41.68107558	23.93826434	36.66348078	0.420562981	2.17E-08	-0.749462917	7.57E-21	no	no	no	no
Exosc5	8.533664472	14.90582645	5.046358468	13.16100705	0.52352793	2.45E-16	-1.454273587	3.66E-64	no	yes	no	no
Exosc6	9.398198959	31.81065907	8.951459522	32.47264823	1.50379329	4.85E-62	-1.770268442	1.79E-63	no	yes	no	no
Exosc7	31.25149052	56.43522392	26.73076049	53.23947876	0.810719778	1.16E-07	-1.152553586	6.55E-11	no	yes	no	no
Exosc8	10.88387886	44.34116619	15.36707509	38.60506764	1.902939496	4.21E-53	-1.606140324	1.96E-26	no	yes	no	no
Exosc9	5.381680526	11.41579832	6.706713313	8.597766641	0.86810352	4.57E-20	-0.736299412	1.87E-13	no	no	no	no
Exph5	24.58175801	6.540668633	8.258912517	3.712842772	-2.224716808	1.64E-62	0.463320736	0.026202755	no	no	yes	no
Ext1	33.25631731	17.63348658	27.7548615	21.63717497	-1.223197054	3.23E-90	0.761566456	4.36E-15	no	no	yes	no
Ext2	17.76872299	19.49048044	13.99935394	18.26198366	-0.13182176	0.013985221	-0.409737608	1.05E-07	no	no	no	no
Extl1	12.30323913	2.783091065	4.492024147	1.764574806	-2.459646587	8.36E-37	0.812469763	0.024585323	no	no	yes	no
Extl2	11.46728329	13.4036664	10.59384522	11.78346698	-0.110338995	0.205339404	-0.192245755	0.042379174	no	no	no	no
Extl3	22.52372631	28.91458333	20.10347358	23.93507659	0.072546794	0.35154791	-0.440931693	1.69E-06	no	no	no	no
Eya3	13.8595932	33.92017846	26.54556808	32.65598768	1.02035373	1.28E-117	-0.27487468	0.000139139	yes	no	no	no
Ezh1	9.657543805	17.44672119	13.1419139	13.86762342	0.527016121	5.93E-15	-0.278473629	0.004265953	no	no	no	no
Ezh2	6.562034017	31.21152003	14.66543884	30.34496039	2.034346694	2.50E-92	-1.060970765	3.40E-13	no	yes	no	no
Ezr	5.86894029	37.60786252	43.24714868	33.33390855	2.449068434	4.56E-128	0.250138209	0.044594918	yes	no	no	no
F10	105.2429947	54.37119022	80.1525261	60.8597685	-1.084294314	2.39E-23	0.485564787	0.000352449	no	no	yes	no
F11	74.90842538	2.666973622	43.29459678	6.206756941	-5.082980963	2.34E-101	3.901344641	3.53E-33	no	no	no	yes
F11r	63.42032669	33.1192605	66.01748953	38.36724507	-1.195896975	4.44E-114	1.035547201	9.24E-45	no	no	no	yes
F12	159.4176608	70.48853027	134.4837935	72.51090326	-1.385361742	5.19E-75	0.920614774	1.05E-24	no	no	yes	no
F13a1	0.469666264	1.484129265	5.354413206	2.988721097	1.303505834	5.34E-11	1.84900537	1.20E-07	yes	no	no	yes
F13b	88.37297192	48.13553306	84.12928813	53.70023903	-1.042178055	4.95E-16	0.766106755	5.62E-06	no	no	yes	no
F2	189.0776142	94.08712541	154.4869018	116.2755473	-1.086904948	4.42E-17	0.571822539	0.000171765	no	no	yes	no
F2r	16.20543534	32.29577251	54.46692693	37.78587863	0.69047101	1.75E-07	0.855784321	3.56E-13	no	no	no	no
F2rl1	0.21563474	10.07858409	12.05638656	9.933516226	5.12432455	9.03E-90	0.39391534	0.075342545	yes	no	no	no
F2rl2	6.085262266	2.337242702	3.271295595	2.804582296	-1.72579035	1.35E-14	0.595419747	0.032806293	no	no	yes	no
F3	7.21854718	1.627045007	9.091180708	3.325430917	-2.471540127	1.50E-41	2.423270765	3.83E-09	no	no	no	yes
F5	122.4994901	5.542331426	41.47825347	12.77758057	-4.759565076	6.13E-39	2.752261816	1.35E-10	no	no	no	yes
F7	75.82578979	23.88297094	43.93605298	28.8998449	-2.004593915	1.20E-90	1.01990657	2.26E-15	no	no	no	yes
F8	16.0687064	5.173278896	6.632165004	2.842949782	-1.962902143	2.41E-28	0.483004901	0.057935558	no	no	yes	no
F830016B08Rik	45.16701776	4.36131457	20.3309331	4.67905626	-3.68437148	3.22E-99	2.293275867	3.16E-23	no	no	no	yes
F8a	8.264715255	1.811342257	4.64568965	2.502287867	-2.549852109	1.57E-62	1.498864019	4.49E-14	no	no	no	yes
F9	100.3651353	11.23251473	41.91399814	19.13553711	-3.425789313	1.59E-109	1.93522257	6.13E-30	no	no	no	yes
Faah	43.92385025	22.90585572	23.60874833	24.78250332	-1.220884536	4.64E-102	0.128991749	0.203319622	no	no	yes	no
Fabp1	154.6472083	71.79156502	107.2618939	84.56793895	-0.925727184	0.00036274	0.190501124	0.598971889	no	no	no	no
Fabp2	78.60404763	35.43229493	61.43429599	32.95260384	-1.302547572	3.88E-15	0.736646251	0.00164719	no	no	yes	no
Fabp3	2.696764143	4.620376913	10.23430982	14.30821714	0.430766744	0.051975709	1.290940911	4.65E-05	no	no	no	yes
Fabp4	10.35580695	45.83530838	40.65826005	48.1739779	2.087668907	5.05E-29	-0.229669629	0.251978016	yes	no	no	no
Fabp5	63.24554417	77.09520811	111.9906371	86.86866235	0.445829685	0.046523769	0.16102703	0.585947749	no	no	no	no
Fabp6	0.171551166	9.384141632	16.5824963	21.07820566	5.052631465	2.77E-12	0.73469809	0.294891286	yes	no	no	no
Fabp7	6.008726115	1.301755282	2.562883231	0.699759088	-2.375938801	6.97E-10	0.916124733	0.089606964	no	no	yes	no
Fadd	12.82810448	10.0466497	7.966678323	9.695829308	-0.636250525	6.78E-14	-0.253803737	0.021991909	no	no	no	no
Fads1	131.7169133	36.45687173	55.49791781	60.33997906	-2.103959302	6.42E-103	0.620277954	0.000687279	no	no	yes	no
Fads2	61.82393806	18.17683331	26.2662997	26.12181265	-2.051782914	2.06E-88	0.596845219	7.43E-05	no	no	yes	no
Fads3	39.6575544	22.9767704	36.76091186	24.70949266	-1.126530332	1.82E-36	0.797930029	8.19E-30	no	no	yes	no
Fads6	26.44924645	20.85534743	23.92146231	17.75572552	-0.641723084	2.31E-17	0.293092192	0.000492512	no	no	no	no
Faf1	16.90064226	22.75577146	16.18374287	22.69865583	0.251235027	0.021953297	-0.495281824	0.000208132	no	no	no	no
Faf2	22.52958898	17.41640561	22.70614913	18.73510348	-0.6393127	1.85E-85	0.452684197	2.55E-24	no	no	no	no
Fah	103.4328104	48.20055057	76.78835883	50.98335316	-1.258689029	4.62E-15	0.609866015	0.001708004	no	no	yes	no
Fahd1	82.37433413	38.13564799	51.4367967	35.31033592	-1.38789174	7.65E-88	0.50932862	3.26E-06	no	no	yes	no
Fahd2a	29.87750807	13.27635952	19.44814441	12.16666738	-1.434826645	6.34E-48	0.641685096	1.29E-09	no	no	yes	no
Faim	8.042093821	10.08383795	6.109328208	8.512548393	0.064953384	0.537598785	-0.663130647	1.35E-07	no	no	no	no
Fam101b	1.809439312	12.30661434	6.889334374	10.6914618	2.405744022	1.60E-116	-0.681351524	1.33E-09	yes	no	no	no
Fam102a	18.65379134	4.144551558	8.818666487	4.744133754	-2.520514448	8.84E-51	1.217008922	9.52E-08	no	no	no	yes
Fam102b	2.662073457	6.145684079	9.249504194	4.40276808	0.857062674	1.15E-13	0.749102022	0.00018069	no	no	no	no
Fam103a1	36.21793673	41.05938558	39.99131672	42.91164209	-0.055726585	0.546165157	0.01242643	0.896797244	no	no	no	no
Fam104a	14.62090947	18.01127412	16.70713866	17.45990867	-0.014391108	0.82130475	0.010948718	0.908927242	no	no	no	no
Fam105a	2.976238115	11.04445366	11.8251575	9.59946284	1.602154949	5.44E-33	0.213220372	0.188181079	yes	no	no	no
Fam107b	70.10048828	29.02324717	52.2122134	20.13670181	-1.566230963	2.81E-87	0.92159446	2.56E-12	no	no	yes	no
Fam109a	10.26601678	25.04357703	23.57490535	21.26681766	0.94611463	4.76E-22	0.050246632	0.760513447	no	no	no	no
Fam109b	0.302627239	2.847765461	3.106420196	1.957769643	2.730037218	2.16E-20	0.30856347	0.421429794	yes	no	no	no
Fam110a	3.741725653	3.310368528	6.311825476	4.433030805	-0.503070068	0.028993171	1.020158158	2.36E-05	no	no	no	yes
Fam110b	5.548722518	3.854611452	4.41996351	3.447578233	-0.678208707	2.99E-07	0.141804504	0.423146986	no	no	no	no
Fam110c	1.00001301	2.70558795	13.42967165	3.620681141	1.160798766	3.06E-08	2.308381014	9.25E-28	yes	no	no	yes
Fam111a	5.009807139	13.39792383	16.11879768	12.17033277	1.05686539	3.27E-13	0.42699988	0.011510717	yes	no	no	no
Fam114a1	26.78874707	8.116242432	35.78325791	7.597255182	-2.031696987	3.52E-88	2.248369053	2.67E-63	no	no	no	yes
Fam114a2	31.65343387	37.99238428	37.08838698	35.0451331	0.024888877	0.770702569	0.009124594	0.945638082	no	no	no	no
Fam117a	3.564730053	11.93617847	12.13770996	9.101501632	1.424694966	6.75E-14	0.173317654	0.496501628	yes	no	no	no
Fam117b	7.189337161	21.70807715	13.70223567	19.22812366	1.301283913	3.14E-43	-0.562228969	1.03E-10	yes	no	no	no
Fam118a	4.234720062	10.45833495	5.561382503	9.185557261	1.012891042	1.75E-36	-0.796919641	3.14E-24	yes	no	no	no
Fam118b	12.19075497	20.26747851	18.51478311	21.09772995	0.452953337	5.96E-07	-0.025498227	0.844400038	no	no	no	no
Fam120a	66.14358252	80.55788096	64.10098801	78.32608613	0.235578853	0.06236732	-0.481022982	0.001354689	no	no	no	no
Fam120b	19.79882227	23.19553538	25.83412584	22.65756943	-0.063764041	0.267209883	0.25023356	6.81E-07	no	no	no	no
Fam120c	7.087343678	11.04903531	4.27394934	6.725021454	0.313096053	0.004024838	-1.216499621	1.77E-11	no	yes	no	no
Fam122a	8.372739988	6.695024075	7.881980688	5.598025234	-0.674912515	1.66E-07	0.398480687	0.021496692	no	no	no	no
Fam122b	2.685793559	9.875955727	5.632556779	7.946079703	1.550539456	4.97E-70	-0.672750153	1.16E-09	yes	no	no	no
Fam126a	10.51981204	28.75793054	31.17118609	26.4217811	1.155071747	2.14E-40	0.206745718	0.051775744	yes	no	no	no
Fam126b	23.87189665	11.28096633	16.86028026	12.00374279	-1.426646112	7.97E-26	0.713865322	1.99E-10	no	no	yes	no
Fam129a	3.200922125	5.247400887	8.415665779	4.708337419	0.391014281	0.000706364	0.813817725	8.08E-11	no	no	no	no
Fam129b	4.951357702	27.58555424	32.12438958	31.30284015	2.171850293	1.89E-53	0.31096325	0.127878566	yes	no	no	no
Fam129c	1.52196535	5.809878266	3.97328394	5.228334588	1.607559381	4.23E-32	-0.394776412	0.010051933	yes	no	no	no
Fam131c	4.891697794	0.693779495	2.232453376	1.022367942	-3.098514605	3.86E-14	1.544327041	0.008138713	no	no	no	yes
Fam132a	5.300517992	34.06843471	13.68570593	16.49286382	2.386455048	1.07E-57	-1.220757094	2.62E-11	no	yes	no	no
Fam132b	0.853655586	3.491228305	1.856881344	3.546240877	1.677670748	3.08E-13	-0.773122606	0.000788666	yes	no	no	no
Fam133b	6.995580638	14.18717338	11.25638525	12.98686036	0.722407103	9.95E-26	-0.222563802	0.001498992	no	no	no	no
Fam134a	86.00204768	34.1447837	44.83584121	36.71451996	-1.620170113	2.19E-177	0.464846078	2.79E-09	no	no	yes	no
Fam134b	45.49030444	3.477596326	16.59457865	7.758087589	-4.016249655	7.34E-52	2.252273325	4.24E-11	no	no	no	yes
Fam134c	56.70172588	27.7667761	44.77465936	33.31140875	-1.322864194	6.78E-158	0.775776613	3.78E-32	no	no	yes	no
Fam135a	17.76515474	23.64952973	27.83418278	22.16236903	0.146225149	0.133211212	0.307295902	2.24E-05	no	no	no	no
Fam136a	74.02400143	86.24506976	74.23877866	90.64462551	0.135354834	0.221687223	-0.335435667	0.01091652	no	no	no	no
Fam13a	19.90321691	4.331972758	9.0126022	1.949169984	-2.524831638	3.63E-59	1.175487051	1.51E-08	no	no	no	yes
Fam13b	19.30322038	13.53282625	17.6030355	14.66944634	-0.811623933	3.66E-20	0.482529498	2.31E-06	no	no	no	no
Fam149a	17.47803403	15.47829428	11.09051169	15.47076262	-0.457090361	2.28E-05	-0.391944397	0.056074025	no	no	no	no
Fam149b	12.18046633	12.2329146	10.91342703	11.44958677	-0.32220978	7.89E-08	-0.018464554	0.856882877	no	no	no	no
Fam151b	5.147139231	2.696661144	2.229375547	1.938553831	-1.14495135	3.26E-12	-0.222769374	0.372435875	no	no	yes	no
Fam160a1	5.504720319	0.417417361	2.909139271	0.69718941	-3.981255284	1.88E-65	2.75243244	2.00E-20	no	no	no	yes
Fam160a2	14.40846407	15.99713368	13.26935858	13.77712173	-0.179257474	0.028473945	-0.126932392	0.176692993	no	no	no	no
[truncated: 929,624 more chars]
