# Supplementary material for: Integrative analysis of RNA polymerase II and transcriptional dynamics upon MYC activation
Source: HighWire-hosted journal article supplement (doi:10.1101/gr.226035.117), 2017-09-13
Supplement: Supplemental_Code.zip [file p493_RNAseq.xls]

GSM1001393_Low_cMyc_P493	GSM1001394_High_cMyc_P493
A1BG	5.97469978520165	6.0723264751192
A1BG-AS1	6.71633889572797	2.95950242390342
A1CF	0.326795835263026	0.0720000197725014
A2M	0.467424402165802	0.25906776940386
A2M-AS1	0.062154942366183	0.0787407623643714
A2ML1	2.47777441429812	1.17369789721158
A2MP1	0	0
A3GALT2	0	0
A4GALT	23.9975623890463	25.6721451434031
A4GNT	0	0
AA06	0	0
AAAS	39.8844915496243	49.2151196666914
AACS	22.3549235106431	19.1033698389929
AACSP1	0.385215328246099	0.244004317805002
AADAC	0	0
AADACL2	0	0
AADACL3	0	0
AADACL4	0	0
AADACP1	0	0
AADAT	0.450108804486232	0
AAED1	13.8706998933512	11.1055328456976
AAGAB	24.8638200613232	23.7124592423438
AAK1	14.9088867766611	5.82616133374581
AAMDC	8.209922456289	6.09184464100612
AAMP	46.0173598243564	60.9816514905344
AANAT	3.09944629538728	3.04505807215144
AAR2	28.2681352256905	30.5798080361021
AARD	1.75053513771633	0.86777963360466
AARS	58.0977675860859	65.081383797578
AARS2	19.727604373622	29.5292678332333
AARSD1	0.340897451924369	0.971695564650735
AASDH	6.22065625725549	5.10780648744136
AASDHPPT	17.9158370589018	24.2577556155912
AASS	0.314243729420045	0.227484870925866
AATBC	1.92436751495365	4.09846152764508
AATF	39.3640226772546	62.0134808319798
AATK	0	0.128559945719209
AATK-AS1	0.376963003202557	0
ABAT	28.0347194775332	11.5578426343626
ABCA1	16.2339996313006	6.9408189962721
ABCA10	0.615254807150629	0.487145819776182
ABCA11P	5.88503888514172	3.94699768833087
ABCA12	0.014507242150997	0.055135340648094
ABCA13	0.263740013678725	0.143193461044757
ABCA17P	0.324720170233912	0.316438896161118
ABCA2	18.4571735040379	25.7984765762515
ABCA3	16.242359972487	31.0445176365254
ABCA4	0	0
ABCA5	0.630421380291446	0.159729405917543
ABCA6	3.70485404030069	1.17337021191061
ABCA7	56.1888532502867	45.7414840971194
ABCA8	0.257711414089682	0.326480766338259
ABCA9	1.5028945709293	0.275569758539378
ABCB1	0	0
ABCB10	9.72711150415775	13.3050044316003
ABCB11	0.0827681300719558	0.0349515013782992
ABCB4	0.0299675614979811	0
ABCB5	1.28614103989713	0.737083779798767
ABCB6	10.2859908896633	8.64874121438573
ABCB7	23.9818255909255	22.2750701994137
ABCB8	20.8196813455775	23.4695799664003
ABCB9	5.15887051717913	5.39392491514358
ABCC1	44.1945291542933	42.3045910023521
ABCC10	17.5102645827619	12.4746895656896
ABCC11	0	0
ABCC12	0	0
ABCC13	0.327427675822299	0.159538676385844
ABCC2	1.93766894570355	1.09099059855636
ABCC3	0.132187545174887	0.0837306550847068
ABCC4	16.7882711657944	15.2443831369804
ABCC5	10.5127930486658	10.0741515738133
ABCC5-AS1	0	0.367177073114883
ABCC6	0.682222629635343	0.493869287803206
ABCC6P1	0	0
ABCC6P2	0	0
ABCC8	0.052851033808259	0.0334770698465941
ABCC9	0.392388413707994	0.241016161358825
ABCD1	31.3491446006664	30.2206573166037
ABCD2	5.87914068874153	2.80507884559195
ABCD3	8.18636402649067	11.4576327894581
ABCD4	27.6113619752023	16.454784566857
ABCE1	17.5934899192234	33.0804532261773
ABCF1	5.99777909366934	7.33576619695836
ABCF2	24.5158506326617	44.591389575573
ABCF3	37.1061390865486	42.3337084072967
ABCG1	33.4831221514304	23.3532765060533
ABCG2	0.0279524694540083	0
ABCG4	0	0
ABCG5	0.219364484596303	0.231584248642927
ABCG8	0.051006701296376	0
ABHD1	0.832241993601074	1.5229106223003
ABHD10	15.7441835924176	16.3859638726533
ABHD11	21.389663096657	20.4212416399676
ABHD11-AS1	29.6006014214561	6.18922368698724
ABHD12	32.9260844585765	32.7841458757835
ABHD12B	0.875445812941021	0.403292850798315
ABHD13	9.71681507806209	5.74886276319989
ABHD14A	10.6966121061536	13.7487883822127
ABHD14A-ACY1	0	0
ABHD14B	17.6808411915785	27.825449143213
ABHD15	17.7867436903653	16.9896279145399
ABHD16A	3.25619534319268	2.17110484802866
ABHD16B	6.35271807052472	27.149602050364
ABHD17A	13.003588287115	39.5556715968485
ABHD17B	21.4323587431868	20.2315693596341
ABHD17C	4.95348553818493	13.2802968673475
ABHD2	11.9516134611561	10.3138845798874
ABHD3	17.3933560832343	10.5862410156563
ABHD4	20.8448953793457	9.2925394371445
ABHD5	2.23465189389615	2.67011057820719
ABHD6	6.0832442982232	10.1586154829852
ABHD8	18.9915764664181	23.565038050331
ABI1	31.3552754633653	24.5813187208116
ABI2	15.9816940463177	11.7045324984402
ABI3	34.7405457452157	34.9474576768595
ABI3BP	0.183292932933611	0.232203984522502
ABL1	50.1969068285364	63.6495267867014
ABL2	8.59089872325584	9.80812635144891
ABLIM1	15.5061392719711	16.197598507558
ABLIM2	1.15317002922217	1.81865804791269
ABLIM3	0	0
ABO	0	0.10906019461107
ABR	43.607217959431	43.5930044247535
ABRA	0.29615001950946	0
ABRACL	17.6954017574351	11.0048834955119
ABT1	27.3908014509094	34.3955516462563
ABTB1	41.67724341903	17.3960916182192
ABTB2	18.74171173842	18.0530100566005
ACAA1	37.588910420168	39.7617041573226
ACAA2	24.8109096230917	32.2329829986032
ACACA	11.9359066146003	24.0440843703169
ACACB	8.88161207434364	7.15192393573032
ACAD10	24.2710131703023	21.9946655076418
ACAD11	14.8700455943289	10.702344333882
ACAD8	10.6436521018602	9.29240438883051
ACAD9	19.0542274957727	23.9939460340812
ACADL	0	0
ACADM	19.7288254942131	21.4002605562462
ACADS	23.1951548338112	24.7802576558583
ACADSB	12.538496331805	9.53640625462037
ACADVL	70.2913212099307	53.6518686628906
ACAN	0.306817324829889	0.145758903942248
ACAP1	96.5838734679142	83.1505276193206
ACAP2	26.2367355422246	15.2726105953065
ACAP3	22.9927296451638	42.5991316634621
ACAT1	11.0207464786891	19.6089782840902
ACAT2	8.24295238453842	10.6347484562076
ACBD3	28.1016878119828	24.2006254397562
ACBD4	22.8458586478726	17.4209737563172
ACBD5	14.9277865655888	11.0479222120405
ACBD6	19.515113414309	37.9364807150702
ACBD7	3.86154457283987	1.6854733680893
ACCS	0	0
ACCSL	0	0
ACD	20.1191834510773	21.9988494478734
ACE	17.2508930674934	8.79084553631127
ACE2	0	0
ACER1	0.124938289480553	0
ACER2	2.98455378942767	2.30786547552648
ACER3	11.3186688000829	7.72100772481129
ACHE	3.22816231566578	2.70996640944161
ACIN1	55.2321763354566	55.2816920838844
ACKR1	0.0615080809750417	0.0779212883669142
ACKR2	2.30825953834269	0.828909974926018
ACKR3	2.41894410466516	0.448453248153334
ACKR4	2.63520889734751	1.39100199750307
ACLY	58.7472052816084	73.237963192564
ACMSD	0.801372786763992	0.126902024532705
ACO1	11.7813070863041	13.9213707769363
ACO2	37.392694510015	55.0983960139008
ACOT1	0.750691234669901	0.512082553541275
ACOT11	1.16091727368266	0.701926823196523
ACOT12	0.333332170070726	0.0844561291274548
ACOT13	6.18861183495753	5.60561456011743
ACOT2	4.0975829042744	9.6296959603463
ACOT4	0.416460964935178	0.105518411330196
ACOT6	0.541565175118893	0.171519967421196
ACOT7	13.6374557927888	36.7913813464675
ACOT8	12.0040211266092	8.08554513088399
ACOT9	21.8524116742183	15.6472793843935
ACOX1	11.500822767994	7.37187145240667
ACOX2	0	0
ACOX3	18.9989353614089	20.401115752264
ACOXL	16.6999718318505	18.4599075084473
ACP1	29.8519219665536	32.9555102266469
ACP2	15.1522157891785	7.99813724466397
ACP5	58.7199446817551	45.8894095165039
ACP6	2.97229283428955	2.21742480719549
ACPP	1.06809475344297	0.451037316110216
ACPT	4.4402715619993	8.43771278485382
ACR	0.0775872482618962	0.0982911228829225
ACRBP	3.95345202970942	1.16863047119356
ACRC	0.855461667431354	0.379308474208987
ACRV1	0.462750158144143	0.879350028719389
ACSBG1	0.86668601347047	0.346723585149423
ACSBG2	1.91040774747346	1.7375745312233
ACSF2	46.6601625031096	21.0094226430148
ACSF3	22.2951828952756	30.3291922833689
ACSL1	17.6952245908176	25.0343592977932
ACSL3	23.0035427444791	25.8249839321797
ACSL4	23.9252023540013	20.0449775759394
ACSL5	34.8536682265291	32.9468966588929
ACSL6	0.454118682477201	0.268472679518076
ACSM1	0.979255174821015	0.0775353657320488
ACSM2A	1.00129114855129	0.538143897784001
ACSM2B	0	0
ACSM3	1.07523910080849	1.07539163587144
ACSM4	0.0779878708863122	0
ACSM5	0.244571534643473	0.0619669115836201
ACSM6	0	0
ACSS1	39.4030055239266	31.491824117835
ACSS2	6.42839389357381	2.9123478088655
ACSS3	0.168546632306066	0.160142015459591
ACTA1	1.27550940038056	0.923356821935015
ACTA2	10.8423704242162	7.20836124124647
ACTB	96.5949876549944	107.389922966572
ACTBL2	0	0
ACTC1	0.0368082477538159	0.139891183826873
ACTG1	86.2737765148072	99.8058801400826
ACTG1P17	8.72208417022595	4.79508364127149
ACTG1P20	12.6091565998835	6.55837510421528
ACTG1P4	0.068549096800223	0
ACTG2	0.591246124358744	0.612832908508471
ACTL10	1.34056073919963	10.444449613796
ACTL6A	20.9676078345874	33.4292956440848
ACTL6B	0	0
ACTL7A	0	0
ACTL7B	0.0966118400531927	0
ACTL8	0	0
ACTL9	0	0
ACTN1	3.25643399275803	3.91323803563123
ACTN1-AS1	0	0
ACTN2	0.0287688590380618	0
ACTN3	0.0408206783648175	0.155140583144937
ACTN4	67.211975868357	79.2463639439452
ACTR10	15.5501599575591	13.3913442944708
ACTR1A	44.5697017526841	45.6139234209398
ACTR1B	44.3076103590628	48.2756545328287
ACTR2	58.8131773671562	52.6284593591672
ACTR3	31.2962236056549	27.0270671058464
ACTR3B	8.95182562354847	15.7680774019164
ACTR3BP2	0	0
ACTR3BP5	0	0
ACTR3C	2.2017294056066	2.30416542149769
ACTR5	11.1860843996724	15.9771645328368
ACTR6	8.80334408955284	7.84082964192074
ACTR8	21.5006781636403	19.0937866412905
ACTRT1	0	0
ACTRT2	0	0
ACTRT3	0.475052427700397	0.515844375309676
ACVR1	0	0
ACVR1B	11.5172470889963	11.9884404212216
ACVR1C	0	0
ACVR2A	5.50335461355636	2.05988094845551
ACVR2B	4.67547328050701	6.41920403258017
ACVR2B-AS1	1.7821948134723	2.32618419065949
ACVRL1	2.33114257004963	0.536945359036152
ACY1	1.78545786718269	2.71428095554803
ACY3	62.0062964309395	35.7658713604136
ACYP1	11.096559914681	12.5514611728047
ACYP2	10.9013258408957	10.2872679641852
ADA	31.6762602133673	37.2063979460061
ADAD1	0	0
ADAD2	0	0
ADAL	9.80004982633851	7.16259082505552
ADAM10	29.2741312909066	21.2113252091412
ADAM11	10.9066709134212	5.93275593567856
ADAM12	0.0389102215413889	0
ADAM15	14.7227378027336	28.5495069604431
ADAM17	31.342480854556	15.9775037507675
ADAM18	0	0
ADAM19	34.1938149427251	14.3828431047172
ADAM1A	8.85478130515697	9.1560257538461
ADAM2	0	0
ADAM20	0.0973731081338411	0
ADAM20P1	0.179094675829832	0
ADAM21	0.0510258479560218	0
ADAM21P1	0	0
ADAM22	2.58617662195338	2.68902918680904
ADAM23	0	0.0274563213155103
ADAM28	0.569949094150282	0
ADAM29	0.355638293777203	0
ADAM30	0	0
ADAM32	0	0.0506190615199531
ADAM33	0.626934615505778	0.453845619610292
ADAM3A	0.623340984398228	0.225622073096469
ADAM5	0.408206783648175	0.0646419096437238
ADAM6	0	0
ADAM7	0	0
ADAM8	58.1301175833533	64.1948875350277
ADAM9	8.88610983123207	8.19488682151563
ADAMDEC1	0.390291227515954	0.423804874382806
ADAMTS1	0	0
ADAMTS10	22.6858051089295	23.4372353519493
ADAMTS12	0.105374309267319	0
ADAMTS13	9.49055820467113	6.19866918392873
ADAMTS14	0.481462310347729	0.076242346793483
ADAMTS15	0.0239487066516635	0
ADAMTS16	0.255251186156242	0.146983652518676
ADAMTS17	0.758828572922323	0.207852803006494
ADAMTS18	0.0448105683055356	0.0567681052549465
ADAMTS19	0	0
ADAMTS2	0.422987679916058	0.243572909888091
ADAMTS20	0	0
ADAMTS3	0	0
ADAMTS4	2.24799997015544	1.36986179548952
ADAMTS5	0	0
ADAMTS6	7.64937433688842	2.13633285422885
ADAMTS7	0.646580905128471	0.409559332386746
ADAMTS7P1	0.237707194115314	0
ADAMTS8	0.162754859859725	0.123711240869885
ADAMTS9	0.0469327398854329	0
ADAMTS9-AS2	0	0
ADAMTSL1	0.0124378130620223	0
ADAMTSL2	6.19690463893599	6.3636840131667
ADAMTSL3	2.09127475315142	1.57365850040249
ADAMTSL4	5.5156002979059	1.61537086245808
ADAMTSL5	14.7772755579233	12.1368623755541
ADAP1	28.3554939237343	43.4419689336416
ADAP2	17.0468746141417	9.52205465685027
ADAR	74.1939709434943	76.90284153052
ADARB1	0.558185502516101	0.241914697944829
ADARB2	0.338485896661746	0.155930772872331
ADARB2-AS1	0.422151735884603	0
ADAT1	24.5229970359832	19.9783868353006
ADAT2	2.7393382760151	8.06677200041358
ADAT3	6.5207644517083	20.4402011852029
ADCK1	13.2681961883063	9.86497378807601
ADCK2	15.37144622539	26.1905178306855
ADCK3	15.8605280455912	27.8981524631299
ADCK4	19.42746716706	18.0635713941483
ADCK5	36.2352165126261	48.3927307783042
ADCY1	0.210243382499176	0.146490334869668
ADCY10	0.0926446474389791	0.146708167738014
ADCY10P1	0.279275836778884	0.165106469118773
ADCY2	0.374633640867711	0.224812072181306
ADCY3	12.4211884554481	34.942593246481
ADCY4	0.823236791150934	0
ADCY5	0.174124072102701	0.0245098273969371
ADCY6	2.79639339808771	0.557012703101566
ADCY7	48.6670514063249	35.7580306164714
ADCY8	0	0
ADCY9	19.1576140030831	17.338721986839
ADCYAP1	0	0
ADCYAP1R1	0.0408268085162463	0.0517212936749903
ADD1	39.1760077065212	26.7135879936723
ADD2	20.5282326241397	15.7688677025079
ADD3	41.9003660592554	24.3903430584883
ADD3-AS1	2.42390975311773	1.47394619649826
ADGB	0.231572161762934	0.220024762296695
ADGRA1	0	0
ADGRA2	19.7947704622194	30.7976949597785
ADGRA3	1.15966459790852	8.79340968485826
ADGRB1	1.81965115098739	0.591880408561275
ADGRB2	14.0367792268858	9.84580029648524
ADGRB3	0	0
ADGRD1	8.21312589281864	2.9076339718043
ADGRD2	0	0
ADGRE1	1.29898847953148	0.159253434609322
ADGRE2	4.00591758623266	4.03076760438327
ADGRE3	0.886133369979414	0.224518966480939
ADGRE4P	0.294652150913675	0.0622131673738729
ADGRE5	53.6023902579661	43.0515118227201
ADGRF1	1.2980220114683	0.708354535646342
ADGRF2	0.124571901534863	0
ADGRF3	1.70125735691764	1.82132255199239
ADGRF4	0.120259090788713	0
ADGRF5	0.437083147764766	0.125844816786671
ADGRG1	0.754376591851845	0.477839618950148
ADGRG2	0.11204027113525	0.106453357072458
ADGRG3	0	0.0536300365278357
ADGRG4	0.10796891100464	0.0683900108383162
ADGRG5	22.2852499393547	10.5756481335728
ADGRG6	0	0
ADGRG7	0	0
ADGRL1	21.7644821897915	31.977678884739
ADGRL2	0.0202552315533962	0
ADGRL3	0	0
ADGRL4	0	0
ADGRV1	0.160574327652518	0.0593317089647173
ADH1A	0	0
ADH1B	0.0288604796082467	0.036561793480017
ADH1C	0	0
ADH4	1.405981615894	1.0525052255672
ADH5	22.1669486974877	22.001527335816
ADH6	0.587866655493329	0.114574881763726
ADH7	0	0
ADHFE1	2.54419789487672	0.230221988356792
ADI1	13.2516868565162	10.8934501319188
ADIG	0	0
ADIPOQ	1.17461964964219	1.0044422719494
ADIPOQ-AS1	0.868832916039084	0.300184858729019
ADIPOR1	31.4804066715343	32.32987094733
ADIPOR2	36.582883786944	38.4407780508862
ADIRF	6.47299328356391	6.40647497361906
ADK	17.6673703520644	21.7463971158635
ADM	0.37524598745298	1.18844753133803
ADM2	7.28495780497516	6.16604849883096
ADM5	7.07983640389803	16.3073908419394
ADNP	39.9463207410262	41.2519896862728
ADNP2	20.6410021579842	22.2490085231952
ADO	16.8638509229691	28.6239375061909
ADORA1	0.540240650080388	0.421170399977696
ADORA2A	6.00652312700815	2.50240104307626
ADORA2A-AS1	14.8185249060051	5.63183829215057
ADORA2B	1.65859721801664	1.91847585841299
ADORA3	1.67522889557024	0.454769491085071
ADPGK	37.0111990927063	42.4383236781765
ADPGK-AS1	1.84231347301434	1.38774104043933
ADPRH	10.4235858206535	5.54711611854888
ADPRHL1	7.13131427558767	5.78510881372953
ADPRHL2	30.7878681133676	38.1888041005796
ADPRM	15.6139094745427	6.87554857119608
ADRA1A	0.691677643316015	0.32282869068992
ADRA1B	0.783996080928548	0
ADRA1D	0	0
ADRA2A	0.0350975623431041	0.0444632190268217
ADRA2B	0.416205936787637	0.369088282619768
ADRA2C	0.485970384414655	0.263849919240368
ADRB1	3.37219880705583	3.0686612200681
ADRB2	5.65832174885484	8.09587685598654
ADRB3	0.154118887703903	0.195244951576962
ADRBK1	77.6364499315257	92.903262446706
ADRBK2	21.0900308999035	20.8417427676636
ADRM1	41.2805508189666	60.5960150733583
ADSL	32.2448940297602	56.3372228911143
ADSS	15.0501781398345	28.0451432021839
ADSSL1	0.98122852951041	0.248613157782792
ADTRP	0.982309028923498	0.533329120997221
AEBP1	53.5195331281432	49.9463665510482
AEBP2	9.17611171177856	16.1322696273874
AEN	33.0667310618305	51.0859363592148
AES	47.7488981878269	46.1069227309685
AFAP1	0.734772210566714	1.28545054605805
AFAP1-AS1	0.640248967700169	0.304161402338911
AFAP1L1	0.387188248556737	0.22638831808617
AFAP1L2	0.310240022193284	0.151164016231461
AFF1	32.628666906218	25.2353527683002
AFF2	0	0
AFF3	15.2350310304022	13.9616144062083
AFF4	19.8509300794789	12.0744085382871
AFG3L1P	9.96345471281243	9.77199972804759
AFG3L2	19.7820645471833	34.6665959956088
AFM	0	0
AFMID	12.4295042841644	18.0029036043757
AFP	0	0
AFTPH	35.2772639053313	28.2346078022399
AGA	12.3516536919005	10.404456710724
AGAP1	0.251129588990207	0.121197182926633
AGAP11	1.72613154228371	1.27560035030282
AGAP2	19.849591263281	19.376008934667
AGAP2-AS1	1.86452647815264	0.899835648809303
AGAP3	11.3931637324139	25.4666028297192
AGAP4	1.03549961807705	0.775165725339835
AGAP5	3.82182050252976	2.83520594577184
AGAP6	7.74797680911438	9.9397429893726
AGAP7P	0.391415060750265	0.283350139516051
AGAP9	4.89477859348112	3.4554814327197
AGBL1	0	0
AGBL1-AS1	0	0
AGBL2	3.85376661985377	1.33149005637279
AGBL3	2.38546200260408	0.828616700805255
AGBL4	1.16847729760609	0.740140604402064
AGBL5	24.8380978002406	24.1542303520737
AGER	2.79449648890917	1.44415996796266
AGFG1	13.7830754216056	11.5487232447306
AGFG2	11.6128567727359	9.93435584224443
AGGF1	17.7745332381799	17.0490420418742
AGK	16.7642203381726	17.984257890782
AGL	15.5668516826709	13.4126652386715
AGMAT	9.91266885212863	15.7245851679688
AGMO	0.878757876071707	0.76536021018169
AGO1	18.5234566177747	15.0551662544508
AGO2	33.322969423787	32.2763334350907
AGO3	13.4578046407119	9.45893681686341
AGO4	18.0024395358042	10.4396867196171
AGPAT1	1.86849290659577	1.51401755327815
AGPAT2	45.3109529849474	53.6197123993568
AGPAT3	25.3349650678114	29.3889298781948
AGPAT4	7.73397570279714	2.18611254495059
AGPAT4-IT1	5.94843953286992	2.5119196525412
AGPAT5	12.4135098592572	20.250357798837
AGPAT6	25.4416333479665	21.7781974228403
AGPAT9	0	0
AGPS	11.9424217169629	15.4406972635492
AGR2	0	0
AGR3	0	0
AGRN	31.09793497247	79.0276728080726
AGRP	6.22729065892602	2.47940644005194
AGT	0	0
AGTPBP1	22.9811575677856	21.3383480344237
AGTR1	0	0
AGTR2	0	0
AGTRAP	32.9212392781258	32.1540978925941
AGXT	0.0492331977380812	0
AGXT2	0	0
AHCTF1	6.44005742900032	9.48262607764119
AHCTF1P1	0.261527682461783	0.389782814148665
AHCY	27.9957932603929	56.4873113633044
AHCYL1	25.884155509517	25.7199853240405
AHCYL2	7.71650705039602	4.20232825683872
AHDC1	27.0879953106869	32.3650585934212
AHI1	1.34941879527065	2.27043803625327
AHNAK	56.7016067771145	44.0146678878949
AHNAK2	16.8202556460884	9.36830935929673
AHR	3.78618816362134	3.17011292435589
AHRR	12.0016356924493	14.8034580289324
AHSA1	48.4653264198136	71.2576747410539
AHSA2	45.7143145842199	39.2900048550244
AHSG	0	0
AHSP	0	0
AICDA	27.9747293840495	19.7229545930858
AIDA	29.6322130743243	23.3519222445215
AIF1	2.35021373407749	2.10819258925691
AIF1L	0.0365116462408923	0.0462546460625518
AIFM1	23.1917419981363	29.7509371587687
AIFM2	11.9932154446923	10.7466653140425
AIFM3	4.83938184570245	1.15803117244658
AIG1	0.468835038430152	0.259849607897427
AIM1	10.1711648978374	4.63363120244536
AIM1L	2.70098716957625	0.415724905251893
AIM2	17.3122037348148	4.1775051903448
AIMP1	16.8456671833608	19.3863863054457
AIMP2	11.5972250461883	24.8632192971246
AIP	58.430182681319	61.8712724654177
AIPL1	1.67554271462827	0.858094649495601
AIRE	7.42873725831832	4.23773270738184
AIRN	0	0.0393703811821857
AJAP1	0.0409806629348333	0
AJUBA	1.83421947567149	2.86828541766383
AK1	55.7288728901361	37.3138434332843
AK2	29.8199617807711	46.3413604995212
AK3	19.12061422217	16.4715587324322
AK4	14.0761075256517	22.0903659024777
AK5	0.242693909935444	0.0922367687685486
AK7	1.13067997282216	1.07429835417139
AK8	3.04288144321916	1.86096847709172
AK9	2.12347006291241	0.818729226422569
AKAP1	18.7974099935462	35.7021323985905
AKAP10	19.3501182200155	15.2228750011442
AKAP11	26.1999623308123	17.168526287367
AKAP12	0.29019374383618	0.212838934853897
AKAP13	37.9191632376525	31.2568886541475
AKAP14	0.447147562351454	0.188822420275088
AKAP17A	0.0499875676470368	0.0633265680157687
AKAP2	0.0371502757460624	0.0235318457626237
AKAP3	0.53290927817037	0.259659299292642
AKAP4	0	0
AKAP5	3.70897426160121	1.83169681872526
AKAP6	0.438493093402717	0.194426182425187
AKAP7	1.21754366587694	0.398049228063289
AKAP8	42.3566376273238	43.0406319865253
AKAP8L	44.1770452525913	42.5774711519994
AKAP9	13.7237493260057	6.53692206093719
AKIP1	17.8859024940582	18.0514233782984
AKIRIN1	35.5539722798248	33.101969471908
AKIRIN2	14.916028001256	27.8096722333099
AKNA	69.336439501052	67.1683990401167
AKNAD1	0	0
AKR1A1	41.1917754408613	49.3606007386179
AKR1B1	50.0754094146951	72.6763718895704
AKR1B10	0.851709642574199	0.215797051742958
AKR1B15	4.40995757498437	1.65532998297031
AKR1C1	0.0958285928479677	0.242800207671315
AKR1C2	0.13086195807927	0.373009488716708
AKR1C3	0.0520416764758201	0
AKR1C4	0	0
AKR1C6P	0	0.239674387322032
AKR1C8P	0	0
AKR1D1	1.58914313526344	1.08403087323396
AKR1E2	2.16880206685342	2.74753899947908
AKR7A2	13.0205602224684	20.1228264609159
AKR7A2P1	1.84802980452202	3.38168975042514
AKR7A3	1.53348914211748	3.33033451650373
AKR7L	2.70220895070127	2.15815703173532
AKT1	38.9121881229831	44.870847319157
AKT1S1	16.6190339187315	34.612843392353
AKT2	36.4911483848806	41.2609644188064
AKT3	15.3875774133597	10.1573652740704
AKTIP	7.44985485932018	5.26603083455035
ALAD	40.7106610953557	29.1230815271342
ALAS1	40.8574702486618	41.2957405412062
ALAS2	1.14657519268377	0.242089101158688
ALB	0.0599351229959622	0
ALCAM	0.642261979497587	0.28716961749452
ALDH16A1	48.0535348140427	75.8460633270844
ALDH18A1	32.6976816371307	59.3745366633875
ALDH1A1	0	0
ALDH1A2	0.069906330138772	0
ALDH1A3	5.25062545319133	4.48376260471248
ALDH1B1	20.4563455495561	43.0795584102267
ALDH1L1	0.405342677114948	0.241650303162084
ALDH1L1-AS1	0.311059173809707	0
ALDH1L1-AS2	0	0
ALDH1L2	1.72655316698871	3.04956971875643
ALDH2	50.6118945720213	34.9427804697029
ALDH3A1	1.54164485007957	1.01897069402888
ALDH3A2	6.8702527991617	9.78113770412702
ALDH3B1	3.69469001327985	3.24483630879931
ALDH3B2	8.42441037640303	1.44710964109983
ALDH4A1	17.1576800467994	25.6313385104829
ALDH5A1	6.59944827807841	14.256129253481
ALDH6A1	9.10860386509185	4.63038027286618
ALDH7A1	0.282391208404771	0.227656719742429
ALDH8A1	0.15690595493056	0.265034316723171
ALDH9A1	26.3269173469852	25.8030620626292
ALDOA	41.3010185466716	56.9883373565669
ALDOB	1.00857026429809	0.141967062894378
ALDOC	46.2715122547676	39.0097284595937
ALG1	7.25247641239436	12.3905534684214
ALG10	2.91253647264932	1.54197931696343
ALG10B	5.72121621965982	4.06839778193662
ALG11	10.3625946288445	5.23396556290169
ALG12	28.6415632016102	30.4789464231647
ALG13	16.7466177413317	13.4716508087655
ALG14	7.45894590291471	8.30890105187786
ALG1L	2.50907557245637	1.68279525039948
ALG1L2	4.93802514871273	2.78031963335427
ALG1L9P	3.82859990337928	4.49426635048551
ALG2	27.6959220821341	30.5350301318724
ALG3	17.0745668372039	36.3826358235504
ALG5	13.3010655167081	15.318551278655
ALG6	5.52441461786217	4.80194851537904
ALG8	15.9007424783956	16.8645748162995
ALG9	7.44742238001439	5.95182191097513
ALK	0	0
ALKBH1	8.41363923898443	14.0562769742266
ALKBH2	13.2866704241575	35.534581187007
ALKBH3	20.6768894766475	23.3060815882394
ALKBH3-AS1	0.917035374371016	0.268094520951033
ALKBH4	14.7404797546505	23.3829993492567
ALKBH5	31.7955391030406	37.5713164639876
ALKBH6	20.5932657105362	18.5250299122589
ALKBH7	18.2809780262335	37.7792380232435
ALKBH8	9.69277823872737	9.86575092667202
ALLC	0	0.0677976564137324
ALMS1	7.1706328384836	8.12388029405987
ALMS1P	0.597694731585361	0.32450888308583
ALOX12	6.49526275586975	4.80544398021187
ALOX12-AS1	8.89280385685883	4.74773681783268
ALOX12B	0.162989039514199	0.137654714061455
ALOX12P2	1.23415047040713	0.502546830615409
ALOX15	1.57225712604741	0.739814479438679
ALOX15B	0.22625309413256	0.515930234892784
ALOX15P1	6.67527432367528	1.53755399366857
ALOX5	94.5850662465946	98.5091211562435
ALOX5AP	43.9908701027088	35.3903766479683
ALOXE3	0.0373852747400556	0.0473613991449066
ALPI	0	0
ALPK1	13.7350466985657	5.04845074908374
ALPK2	25.3039043636321	10.5050422879369
ALPK3	0.321149871224525	0.140831842400538
ALPL	5.04921763051489	4.51523503457516
ALPP	1.42238778118077	0.540584034048805
ALPPL2	1.6896225451484	0.276192537756023
ALS2	8.21534980818134	3.88137695100618
ALS2CL	2.10729841929281	0.552335860875952
ALS2CR11	0.275279179738441	0.092996380337994
ALS2CR12	0.496105324652709	0.078561152961168
ALX1	0	0
ALX3	5.70219029445211	4.66051548825116
ALX4	0.12434399831215	0.126019793114439
ALYREF	40.8913796309006	70.4836055000959
AMACR	4.53813116075948	4.94691284919454
AMBN	0.271594123785898	0
AMBP	0.133267508779257	0.168829458128314
AMBRA1	29.2620253458498	27.9509127652323
AMD1	14.6233081121221	22.9068331711597
AMDHD1	0	0.0806208086567792
AMDHD2	23.3997431315168	37.5639998032669
AMELX	0.162793843059691	0.618704361524121
AMELY	0	0
AMER1	12.0267494538987	14.5017765751292
AMER2	0.0790077645770661	0.150136048204778
AMER3	0.587908565142969	0.186197456137807
AMFR	44.366974797761	38.5550205879026
AMH	2.89648807485541	13.4829313537954
AMHR2	0.126842481139822	0
AMICA1	8.30174228769654	9.10924029910884
AMIGO1	0.110022548729132	0.139381665148426
AMIGO2	0.0687223756091214	0
AMIGO3	21.4053088798338	26.7695807026873
AMMECR1	5.68400476753784	5.48074096676579
AMMECR1L	14.3731352119337	13.6293730896048
AMN	1.85415664388531	18.1308157207363
AMN1	6.10172434211261	2.07563398646531
AMOT	16.9054004372095	10.9546971673267
AMOTL1	0.0302106587298238	0.0382722629827493
AMOTL2	10.8688320059842	5.78303890155941
AMPD1	0	0
AMPD2	44.4093340219982	47.5183793438185
AMPD3	26.7342557979488	17.5825088564944
AMPH	0.385953602938223	0.0651925221619838
AMT	32.9027818835163	12.5559305358336
AMTN	0	0
AMY1A	0	0
AMY2A	0	0
AMY2B	3.95361574569038	2.36588255558941
AMZ1	7.77412481827524	6.98817643547937
AMZ2	16.1214172345365	15.027414504157
AMZ2P1	4.23433027095754	2.47580579172192
ANAPC1	10.2265930599429	17.0291657416654
ANAPC10	6.75140159683548	5.64320892299864
ANAPC11	20.1020595439321	30.0402508913739
ANAPC13	18.0063070493928	21.6893610051489
ANAPC15	12.3400949098234	6.80400186850138
ANAPC16	24.99630178323	23.906620129139
ANAPC1P1	0.69079374962935	0.291709848601152
ANAPC2	48.8242309814997	67.3508257933546
ANAPC4	15.664871267957	13.792048477477
ANAPC5	35.1159885633342	44.3635578973173
ANAPC7	23.426409282009	30.1502355026294
ANG	0.102668322473446	0
ANGEL1	17.0949375041726	23.4160010789594
ANGEL2	15.5552034474098	10.2376791001108
ANGPT1	0.448971945255939	0.368033130017424
ANGPT2	1.83053781918308	0.729576233037471
ANGPT4	5.73168223599282	0.448219800340657
ANGPTL1	1.12248438443305	0.237002542376659
ANGPTL2	4.56661340273826	8.6777963360466
ANGPTL3	0.092126641107992	0
ANGPTL4	1.50004731374235	1.35737819724814
ANGPTL5	0	0
ANGPTL6	25.4012283151066	20.5029089940557
ANGPTL7	0.237437308218065	0.225597441865782
ANHX	0	0
ANK1	7.44035043088674	2.98730455918885
ANK2	0.837771357314133	1.45650276032806
ANK3	3.43747823195685	2.6778242288018
ANKAR	4.09392018854078	1.86336570558211
ANKDD1A	30.180897005708	13.058456820353
ANKDD1B	0.958774083537288	0.269915434625204
ANKEF1	0.0702676965390758	0.133527563161706
ANKFN1	0	0
ANKFY1	31.9101646021443	26.3186366393361
ANKH	14.6914153640727	11.1208974124731
ANKHD1	1.21382884274092	0.971200830685261
ANKHD1-EIF4EBP3	0.307467180969286	0.164005759324648
ANKIB1	21.638383073226	20.2195556266549
ANKK1	1.17598226386415	0.812612098895227
ANKLE1	19.6179088398221	46.1775782129809
ANKLE2	43.7349198376449	42.0014749489952
ANKMY1	9.83676461820819	11.1010901378032
ANKMY2	0	0
ANKRA2	14.7188446002058	8.77483043520409
ANKRD1	0.344308153381059	0.348948424094996
ANKRD10	29.4753449985958	24.9829835616158
ANKRD11	42.9215961313054	46.5041880725195
ANKRD12	13.5875575828439	6.37155118084252
ANKRD13A	27.6262345891885	18.5183228580557
ANKRD13B	3.68041956706059	34.6871449020904
ANKRD13C	13.4805482146852	12.3373310746599
ANKRD13D	45.435558105656	37.2826092384756
ANKRD16	7.21402587326683	13.2516404852345
ANKRD17	25.2807090262407	32.044527356705
ANKRD18A	0.18842178468988	0.136400829537331
ANKRD18B	1.44879146234844	2.93663389997771
ANKRD18DP	0	0
ANKRD19P	1.18696118297698	0.719159650797146
ANKRD2	0.0936821908717037	0.237361884618719
ANKRD20A11P	3.46863157333045	2.67216280278952
ANKRD20A12P	8.57374683774807	4.83835798007634
ANKRD20A19P	0.40011634307744	0.30413155918719
ANKRD20A3	0.0685836826210102	0.144808314237202
ANKRD20A4	0.284155440720862	0.0449976606456442
ANKRD20A5P	0.416060346604239	0.276091899169171
ANKRD20A8P	0.272205975378908	0.21552696782338
ANKRD20A9P	1.74407426774121	1.22392031907432
ANKRD22	0.716693456703913	0.302646831794166
ANKRD23	16.7415372376607	14.6728622788511
ANKRD24	2.67116971745323	2.54841554700235
ANKRD26	10.1861325148084	6.73806509035931
ANKRD26P1	0	0
ANKRD26P3	0.0364822487801509	0.0462174039964789
ANKRD27	16.9367873117801	26.3507793980207
ANKRD28	10.5605481647518	10.9004331031462
ANKRD29	0.418622970824415	0.227284708258971
ANKRD30A	0.320115917042017	0.184335310737401
ANKRD30B	0.754396719832631	0.418120822419758
ANKRD30BL	0.0626996581895028	1.42975500518259
ANKRD30BP2	5.79671040319156	3.24339747918147
ANKRD30BP3	0.948299866264432	0.675759505392598
ANKRD31	0.0900814174651041	0.0285298289083632
ANKRD32	9.43352147649663	9.2996160071816
ANKRD33	0	0
ANKRD33B	18.5409331886332	21.1267463996633
ANKRD34A	5.75795332782139	17.2587456033496
ANKRD34B	0	0
ANKRD34C	0.0501227356028179	0
ANKRD34C-AS1	0	0
ANKRD35	0	0
ANKRD36	4.33257762657149	3.09298652214725
ANKRD36B	2.93351161608158	2.20415539023898
ANKRD36BP1	7.7151082109505	4.933470544009
ANKRD36BP2	4.24299097315692	4.08118377972606
ANKRD37	7.71065930336581	5.37800912508167
ANKRD39	20.1325949231559	25.3131383545615
ANKRD40	21.2914744297222	24.3294223685125
ANKRD42	7.12301086727035	2.76686729260498
ANKRD44	17.6547091226005	10.5063021965388
ANKRD45	1.48434327905069	0.752173950797342
ANKRD46	4.83305585636166	6.05862675688317
ANKRD49	22.6554764924737	13.8379859430172
ANKRD50	2.50325373998914	1.84010099412786
ANKRD52	27.707351498366	30.1824776623612
ANKRD53	0	0.162458535180076
ANKRD54	14.6359343133846	22.5615354954703
ANKRD55	5.90790994333522	1.22589542844763
ANKRD6	9.65687980534099	4.6913447561182
ANKRD61	8.02414627702512	4.35658306568636
ANKRD62	1.7806543957744	1.23706013266214
ANKRD62P1-PARP4P3	1.76765746365204	0.559837604976854
ANKRD63	0	0.451984376091549
ANKRD65	4.77501374978232	2.1997122829127
ANKRD66	0	0
ANKRD7	0	0
ANKRD9	1.18753225644882	5.41591529045285
ANKS1A	12.3918257712406	14.0259400249406
ANKS1B	0	0
ANKS3	7.84737241354322	13.3568706770685
ANKS4B	2.33883102124642	1.30369340688209
ANKS6	14.2762061671036	26.7584633119965
ANKUB1	0.187149415724886	0.197574629750895
ANKZF1	37.163685360895	25.4251054856538
ANLN	6.58291203743575	6.5705452006164
ANO1	0	0
ANO10	0.714433386237783	0.482707911116693
ANO2	0.0266953768568032	0
ANO3	0.109640957376062	0.055559299013028
ANO4	0.289526856133849	0.0366786043218062
ANO5	0	0
ANO6	22.6740617890221	16.0339510808162
ANO7	1.16129690653867	1.39375397987223
ANO8	8.22523668835032	12.5406951636458
ANO9	68.3831323364307	65.7928234889972
ANP32A	46.4134092619534	60.2651333382116
ANP32A-IT1	14.0034460002245	5.77344260956929
ANP32AP1	2.21029038950963	2.33341527494418
ANP32B	42.2266678188928	72.7826301359352
ANP32C	0.192812565893393	0.244263896866497
ANP32D	0	0
ANP32E	26.2836684778994	28.8383332783771
ANPEP	0.0744837583314203	0.0943594779676056
ANTXR1	0.659522132353679	0.135488628867726
ANTXR2	12.5352636430438	5.93168038166556
ANXA1	4.80397409937776	1.36622179603295
ANXA10	0.180043521794493	0
ANXA11	34.1011535107338	39.6150748353835
ANXA13	0	0
ANXA2	27.8594482964331	28.5639210009189
ANXA2P1	0.506079147263001	0.512899619630321
ANXA2P2	1.34895203542973	1.97182496897955
ANXA2P3	0	0
ANXA2R	2.79167008911998	0.544094936148121
ANXA3	0.252038675441611	0.106431426014141
ANXA4	47.5854201131288	33.5598399247975
ANXA5	44.2572098922742	38.0455220758922
ANXA6	86.185360011497	87.0704733493215
ANXA7	32.4325498743765	32.1637744940043
ANXA8	0	0
ANXA9	1.04334431215339	0.377644840550176
AOAH	0.159483213478501	0
AOAH-IT1	0	0
AOC1	3.26888577919785	1.38896587807431
AOC2	3.51946238944995	5.29864760895016
AOC3	0.981700955379216	1.53385261188314
AOC4P	1.11474124564994	0.58149654174441
AOX1	0	0
AOX2P	0.441722895217208	0.261144352477505
AP1AR	6.62457603767269	11.9890286088588
AP1B1	62.0182445991131	63.5535858149137
AP1B1P1	0.49310589705505	0.208229803253785
AP1G1	23.6346419780308	21.3471521161822
AP1G2	68.2779422791926	45.3475924532651
AP1M1	50.3707708214095	55.2413376294877
AP1M2	0.154732907176827	0.0980114099549689
AP1S1	21.4851473290229	29.3427420595872
AP1S2	14.897627533621	7.08750194635561
AP1S3	7.76854455150312	10.6018439710598
AP2A1	33.7090604282965	41.0733469511745
AP2A2	22.9655221140716	26.6809955968764
AP2B1	37.439229819275	38.2333188892065
AP2M1	35.1016496541618	45.2313352061489
AP2S1	37.266986050541	54.9511431804607
AP3B1	34.2769693733993	26.1137350053348
AP3B2	0.555783154754035	0.259402266201025
AP3D1	55.4387740249863	68.6848593974716
AP3M1	27.6034996502694	21.9772921273748
AP3M2	9.0851328516654	14.0816590569505
AP3S1	15.7989888898458	20.0148915341853
AP3S2	0.0898284215792778	0.0853491065376905
AP4B1	14.2349009267749	12.8918248356071
AP4B1-AS1	9.72068887566345	4.76694940597593
AP4E1	15.1366283989016	10.0516193542421
AP4M1	13.0131177300208	13.1198065546702
AP4S1	10.1686291769161	5.01121504056966
AP5B1	22.9818252819786	22.6387631540854
AP5M1	18.7164573614928	15.7607586478424
AP5S1	14.9110023853526	13.2668944596546
AP5Z1	26.8649348124009	36.2277851649402
APAF1	16.5781000282849	11.0397702407309
APBA1	0	0
APBA2	0.568459420616172	0.480100497761646
APBA3	22.1443204262955	38.4582530087473
APBB1	3.68984760113641	0.749342518257042
APBB1IP	48.1093355111163	42.3678099712375
APBB2	0.912301066811021	1.97595161429241
APBB3	20.0969345206461	20.7023663409801
APC	11.1946109944393	6.29801102616182
APC2	4.81340990171917	6.20747508735329
APCDD1	48.759678914715	23.3909853463022
APCDD1L	0.0828101486170223	0
APCDD1L-AS1	0.031451378749385	0.0398440646207497
APCS	0	0
APEH	42.304384160847	58.8096382201456
APELA	0.678880970577391	0.595410843495168
APEX1	41.5763734729878	77.0658099595375
APEX2	33.8696670045001	37.9757488536452
APH1A	50.9898191136875	57.604670717779
APH1B	14.8162665151625	8.53546534610659
API5	27.2802955055889	32.0580575601836
APIP	21.915705831495	24.8351578405895
APITD1	3.3901195716815	3.60205730455582
APITD1-CORT	0.884732694266755	2.08152358417615
APLF	1.59047806889441	0.70521197213504
APLN	0.0421627974425689	0.26706893190273
APLNR	0	0.044428804770609
APLP1	4.27364670198936	3.78331467532995
APLP2	13.1332875007866	15.1176471138144
APMAP	29.4874397821862	36.1287520151468
APOA1	0.454624946337265	0.383959971663055
APOA1BP	24.3735653267358	35.3044531399684
APOA2	0	0
APOA4	0	0
APOA5	0	0
APOB	0	0
APOBEC1	0	0
APOBEC2	4.9082244053462	1.47544960959139
APOBEC3A	2.1651355650702	0.715537592621386
APOBEC3A_B	0	0
APOBEC3B	8.39637295234721	5.93427861275465
APOBEC3C	58.9573536134167	52.9506421336251
APOBEC3D	31.6006277275094	19.3811234035862
APOBEC3F	23.1172300488995	11.1752823775918
APOBEC3G	30.012701508624	23.2969820932318
APOBEC3H	14.6279454518334	6.93042710007042
APOBEC4	0.0978638293411391	0.123978435774572
APOBR	54.3086184906608	42.5973819511724
APOC1	2.11075867942301	1.87180486185739
APOC1P1	2.60574170520464	1.28375115126322
APOC2	4.03190683340634	5.65507146823865
APOC3	0	0
APOC4-APOC2	0.817529496174557	0.659071804831144
APOD	2.32043977290755	1.51723389683595
APOE	3.91670949530901	10.3615503030953
APOF	1.85106912727139	1.01957399224914
APOH	0	0
APOL1	41.5676313450072	28.9310406206935
APOL2	45.4362511611933	37.7388987149734
APOL3	30.4762862599414	24.5348454788666
APOL4	5.81733430320798	2.87809549789772
APOL5	0	0
APOL6	24.2665425296641	9.10370266771002
APOLD1	1.77487463505804	0.9279496848835
APOM	1.17367460636049	0.729915742049257
APOO	8.18727582721813	16.6257388438494
APOOL	9.87914700924321	7.82875798724583
APOOP5	0	0
APOPT1	16.9503322097536	19.1030190112151
APP	31.980632441608	47.3566630049921
APPBP2	14.2279754966648	9.9042439072677
APPL1	20.4660066690642	19.0857403823883
APPL2	21.7625588269644	10.484956399336
APRT	63.5027110606883	100.720265577814
APTR	6.02201609152462	7.30294483020772
APTX	18.966147051997	24.7634036135351
AQP1	0.0718081663786805	0.136454871070428
AQP10	0.0758977436933792	0
AQP11	2.6086405973812	2.58632361388056
AQP12A	0	0
AQP12B	0	0
AQP2	0	0
AQP3	0.737262963822873	0.350249587710265
AQP4	0	0
AQP4-AS1	1.32092947684931	0.466999450280353
AQP5	0	0
AQP6	0.291530795184883	0.134299900402324
AQP7	2.55272974563084	0.514486696985131
AQP7P1	3.00506593213488	0.798990939941311
AQP7P3	0	0
AQP8	0	0.263311998915719
AQP9	0.0448031835711411	0
AQR	25.6613408932468	27.3224555347342
AR	0.0109095392419616	0.0138207100554479
ARAF	46.732519925419	36.0484053648719
ARAP1	57.3166925039686	57.1022028636756
ARAP2	12.6768059920831	6.55854220253481
ARAP3	0.022723647434778	0
ARC	0.0922203927780476	0.058414534359186
ARCN1	39.3258737679838	41.6607594666379
AREG	0	0
AREL1	22.4591126658867	20.1808820317409
ARF1	58.6898467461989	73.8025916960916
ARF3	58.954200066929	71.0830729558058
ARF4	29.2177524420178	30.2845117649479
ARF5	27.9325976920607	28.3530058717595
ARF6	34.4404654066851	35.5429084659776
ARFGAP1	54.2866310225384	61.0552864566181
ARFGAP2	47.6992123006945	47.4394061552629
ARFGAP3	25.5263963868606	15.7435108536315
ARFGEF1	2.38242921950335	1.26917992790331
ARFGEF2	16.5250530483189	16.24441455844
ARFGEF3	0.210083036954802	0.17357147623728
ARFIP1	17.948416328018	10.755911691631
ARFIP2	20.5727981602059	21.1975605297519
ARFRP1	21.4299097579504	35.2929240661062
ARG1	0.636049473719181	0
ARG2	6.72798998867401	5.1313923182636
ARGFX	4.72343201896391	3.36592274072994
ARGFXP2	4.85474496267293	3.28965040505834
ARGLU1	44.088917433055	51.4921928461239
ARHGAP1	29.9234410389986	26.8531201395158
ARHGAP10	10.2806363915427	10.1297674876988
ARHGAP11A	10.3673759249604	14.1972275303229
ARHGAP11B	4.49245056247346	3.48818219459139
ARHGAP12	11.6127395464614	5.56129180135776
ARHGAP15	27.1081866728782	19.6948771048676
ARHGAP17	31.2238383475622	32.9485375377452
ARHGAP18	10.619754605847	3.14677363958441
ARHGAP19	10.7353335605679	9.52305526537907
ARHGAP19-SLIT1	0	0
ARHGAP20	0.0190595708012959	0.0241455478534605
ARHGAP21	2.20243238078133	0.361313539018049
ARHGAP22	2.31012908778354	16.6737966182807
ARHGAP23	0.275121320198702	0.697072884968988
ARHGAP24	12.3187151903477	8.76311596077355
ARHGAP25	24.7289594995429	12.2368137944498
ARHGAP26	16.9145521871693	6.78081548894518
ARHGAP26-AS1	0	0
ARHGAP27	23.5493762612417	20.8691347098199
ARHGAP28	1.09812197561538	0.797593713217132
ARHGAP29	0.400509307468598	0.233396528443739
ARHGAP30	73.2683863828357	69.8057571259747
ARHGAP31	31.4804281599839	18.3311301733082
ARHGAP32	0	0
ARHGAP33	11.9639636997053	15.452963572261
ARHGAP35	30.4808942278353	25.7301564809056
ARHGAP36	0	0
ARHGAP39	3.69060163860688	11.9664730033154
ARHGAP4	74.9974394233612	94.0037686555711
ARHGAP40	0	0
ARHGAP42	10.6298207239569	4.89685442533309
ARHGAP44	5.49346982754189	5.56750579476577
ARHGAP5	14.0077581786023	7.33321875801991
ARHGAP5-AS1	6.26076399557821	3.49520470691873
ARHGAP6	11.4902050443977	12.0339288463874
ARHGAP8	1.08596498889543	0.948793648985566
ARHGAP9	55.6185461418563	37.1125994682064
ARHGDIA	73.8454478624245	112.465917384021
ARHGDIB	100.272840857314	98.140452937977
ARHGDIG	0	0
ARHGEF1	65.9762461179481	68.2852050765735
ARHGEF10	1.21943598901128	0.381870077653398
ARHGEF10L	1.71746707200535	0.522858713615797
ARHGEF11	32.5415587867614	14.4229318014733
ARHGEF12	16.1041989086594	8.36463375131929
ARHGEF15	0.336659776417022	0.492111013405068
ARHGEF16	0	0.0394605974543722
ARHGEF17	18.4769865877438	16.156026195343
ARHGEF18	48.7632160695148	56.3906469144581
ARHGEF19	2.91701414066185	1.59186838037129
ARHGEF2	52.7573379000208	53.3513829531369
ARHGEF25	9.43917772582424	5.67591131870741
ARHGEF26	0.446087777791642	0.219770707572682
ARHGEF26-AS1	1.83127408137778	1.65710207169823
ARHGEF28	0.42074945018485	0.195009112891681
ARHGEF3	24.1074296820466	20.99454941189
ARHGEF3-AS1	0.279122913664974	0
ARHGEF33	0.0947487399778175	0.0800213974400001
ARHGEF34P	0	0
ARHGEF35	0.0549445670795643	0
ARHGEF37	0.530878585846249	0.0707938529458912
ARHGEF38	0.022317001962706	0
ARHGEF38-IT1	0	0
ARHGEF39	5.90648169880824	3.15755310132739
ARHGEF4	1.09270786941191	0.784432691303581
ARHGEF40	6.24758381774687	2.88911879706961
ARHGEF5	0	0
ARHGEF6	42.8020584443405	22.5403745096001
ARHGEF7	29.7900034848879	20.4232714670699
ARHGEF9	18.5975696400876	13.4477607428887
ARID1A	46.3434947103714	48.9474058384594
ARID1B	17.098987373796	16.1038306336567
ARID2	6.70298957841279	7.01419899702866
ARID3A	34.5878982749865	62.2638235044606
ARID3B	34.6900297035632	29.961237016274
ARID3C	0.10971175056888	2.22380690609692
ARID4A	22.4929657383705	11.5664968183637
ARID4B	17.8797028744762	8.9378127253955
ARID5A	34.3083593205062	39.8840795771026
ARID5B	12.2551867633211	4.23791503034821
ARIH1	23.0912417040029	23.3499725140177
ARIH2	32.2653819057647	35.8174815643969
ARIH2OS	6.20969881333134	5.81922813123125
ARL1	18.0820345089463	20.0638821454172
ARL10	5.14318827851605	6.51562933882137
ARL11	24.0774691659375	14.6558338119898
ARL13A	0.88440376678492	0.112040369089707
ARL13B	4.43295281089045	6.28642177990558
ARL14	0	0
ARL14EP	22.9626693940666	21.5014330233246
ARL14EPL	0	0
ARL15	11.1630520713407	6.63111694872545
ARL16	23.3611787677495	23.1211126867455
ARL17A	0.484968681902477	0.380589881298318
ARL2	18.920785498627	29.7976621131054
ARL2-SNX15	32.2861236250843	25.5896927764767
ARL2BP	28.8497503005336	26.337395468017
ARL3	11.1932323197198	6.48995428613023
ARL4A	0.237922156863784	0.200940545263571
ARL4C	26.9288148727906	7.08932080913055
ARL4D	10.3772087908744	8.58314052743189
ARL5A	10.8491014189311	12.7929927426807
ARL5B	11.0973328709303	6.28559269855261
ARL5C	4.69469842544196	2.70339163721947
ARL6	1.16931491574058	2.03684572064482
ARL6IP1	29.4074781072257	25.873322376216
ARL6IP4	40.065317001083	65.0891442826606
ARL6IP5	41.8402361914575	26.7858090475946
ARL6IP6	7.72903439905691	10.6204090537396
ARL8A	40.2118930947193	36.7436858564942
ARL8B	19.0806927645155	22.67235396493
ARL9	0.162599113582347	0
ARMC1	19.4381307183946	24.9647820037075
ARMC10	12.5921099411471	14.9715963665951
ARMC12	7.65492209131364	3.08560323644069
ARMC2	3.42520535309593	1.31185386157717
ARMC3	0.0558360480406006	0
ARMC4	0.0624547939144692	0.0791206282062395
ARMC5	13.6903037964036	21.372122443317
ARMC6	22.2759601346245	58.1336510701551
ARMC7	18.6887068518586	16.5730041468781
ARMC8	12.3338202615276	11.7541956621242
ARMC9	8.05270429943072	8.06633325235771
ARMCX1	0	0
ARMCX2	0	0
ARMCX3	18.438223292576	13.1701594609187
ARMCX4	0	0
ARMCX5	13.8697897424396	11.9775859664261
ARMCX5-GPRASP2	0.448509433099733	0.393364067415716
ARMCX6	18.3958724412028	17.9677797276642
ARMS2	0	0
ARMT1	6.34212405699108	5.62414773422782
ARNT	22.0291832721289	14.6954679779477
ARNT2	0.536224295679851	0.436701726012376
ARNTL	0.160534820141532	0.0508432380545853
ARNTL2	2.61128409867577	2.2902201345778
ARPC1A	30.7025036619316	34.4255258473117
ARPC1B	56.9124510712304	69.6247833266198
ARPC2	57.8310847307881	48.1061427654686
ARPC3	76.4237906114893	71.687585297561
ARPC4	37.6248566833201	37.8174741047248
ARPC4-TTLL3	1.51101083062244	0.699426015076256
ARPC5	41.7703559875618	39.7081058230649
ARPC5L	50.1293860340784	69.890454315128
ARPIN	0.968400569982003	0.839399555598592
ARPP19	27.2439274276582	28.6349526277701
ARPP21	0	0
ARR3	3.88921648091314	1.2017170083104
ARRB1	19.8604376484142	9.08877968286087
ARRB2	45.7375675076005	43.6061893784142
ARRDC1	39.5693606943	39.5696815234811
ARRDC1-AS1	9.17453180273728	17.0782856817402
ARRDC2	26.7984562181538	31.4325789922511
ARRDC3	25.9386421557666	7.20111805542254
ARRDC3-AS1	6.89986933943443	4.47377820699729
ARRDC4	11.1707528146697	3.81005356272067
ARRDC5	0.165974186758049	0.210263794005959
ARSA	32.2240303276642	25.4043135750154
ARSB	11.7910300127122	9.80349033266435
ARSD	1.8865589233185	1.11532414048498
ARSE	0	0
ARSF	0.636552340784701	0.513172554719524
ARSG	9.5633255608783	7.03637612586393
ARSH	0	0
ARSI	0.0429216479175378	0
ARSJ	0.0285633240081618	0
ARSK	6.95308741456993	4.96478722717255
ART1	0.0928503134937446	0
ART3	2.01988585595549	1.45234015787489
ART4	0	0
ART5	0	0
ARTN	0.54084691891847	1.06581992134055
ARV1	13.6018946895916	11.8875612126067
ARVCF	2.31611062774029	6.03361720769583
ARX	0.094594891409076	0.119837193661016
AS3MT	0	0
ASAH1	15.6033666592324	13.9532246285656
ASAH2	0.0562170632567585	0
ASAH2B	0.561706028739017	0.237198412246392
ASAP1	26.8871130930349	19.9981216208764
ASAP1-IT1	0.115295045763225	0
ASAP1-IT2	5.15353527302947	1.86535354032465
ASAP2	0.047553912525745	0.0602435008888859
ASAP3	8.47422579492205	2.90257248954843
ASB1	10.5833866477354	9.5011971064923
ASB10	0.17615489281405	0.223161184394229
ASB11	0.790307319504896	0.611843191278967
ASB12	0	0
ASB13	1.30518747929614	7.22628505701418
ASB14	6.86658034009493	1.55721090471953
ASB15	0.0435542643238841	0
ASB16	16.6500276045669	15.5379930468162
ASB16-AS1	23.8394207910175	14.7191174168024
ASB17	0.122793910528313	0
ASB18	0	0
ASB2	8.84283348722876	2.19584110442229
ASB3	18.0287064664621	9.20401836394675
ASB4	0.629027574987701	0.398440646207497
ASB5	0	0
ASB6	25.0020260296595	28.6269544151076
ASB7	14.7061864951145	9.63413948781338
ASB8	23.3057484928317	16.4099907292113
ASB9	0	0
ASB9P1	1.08746287163874	0.31791885653701
ASCC1	11.9660548673452	11.4900586642079
ASCC2	48.7894608412195	53.1669717292216
ASCC3	8.01938175834621	9.71966292268213
ASCL1	0.0547233731702263	0
ASCL2	0	0
ASCL3	1.67301980252113	0.529864760895016
ASCL4	0	0
ASCL5	0.0957273654611564	0
ASF1A	11.0025400190722	9.47545236289533
ASF1B	31.7255199409337	54.1190581896238
ASGR1	10.7578765675918	3.16943645320639
ASGR2	0.0822838129266599	0
ASH1L	21.6709564212633	13.2746720063279
ASH1L-AS1	5.88304124804561	9.2065351148383
ASH2L	27.2606945253273	24.9883964411789
ASIC1	1.02936115321294	2.42696785201703
ASIC2	0	0
ASIC3	14.6271745374917	14.3629071422385
ASIC4	0.260208382379101	0.197786424912956
ASIC5	0	0
ASIP	1.39657046871413	6.48721411027289
ASL	27.8111623878426	22.2408306963695
ASMT	0.182460213362204	0
ASMTL	0	0
ASMTL-AS1	0.0901112754092424	0.0570785705306199
ASNA1	46.6207227196685	64.4427317596341
ASNS	17.3817551236793	26.6558054199264
ASNSD1	17.4935852479319	23.3464289123614
ASPA	0	0
ASPDH	27.4677376090135	17.8096946283329
ASPG	0	0
ASPH	0.451866895885788	1.10195841780086
ASPHD1	0.500673513645827	1.05712736212941
ASPHD2	20.6791913411532	16.8931377511428
ASPM	6.20118157575599	4.34185390412341
ASPN	0.484705123056093	0.272909742140856
ASPRV1	3.62654361517058	1.42580903920692
ASPSCR1	26.4474296522165	42.2102333419023
ASRGL1	3.51247697557732	1.91340052545423
ASS1	3.56155962327097	35.4187983729278
ASTE1	7.09552999907292	7.88072007623621
ASTL	4.92966386641789	4.25200116767606
ASTN1	0.0298491126383053	0.0378142396334827
ASTN2	4.1742631278852	4.96830225591569
ASTN2-AS1	0.154821023866563	0
ASUN	16.6261964581863	31.015605291637
ASXL1	34.6247484389095	31.593239199869
ASXL2	25.833819082641	21.3740194149565
ASXL3	0.0175987647533457	0
ASZ1	0	0
ATAD1	22.1677590687195	21.0242711820774
ATAD2	12.2925834732699	21.6155990725297
ATAD2B	13.1218598107502	10.0424997757438
ATAD3A	15.7870010756247	44.4778711385423
ATAD3B	14.6477912368401	38.0150540914016
ATAD3C	2.95889094382139	3.07909232004943
ATAD5	9.65560818325183	11.1400138409195
ATAT1	1.79721641225843	1.53218418926694
ATCAY	2.78647902711531	1.89822949053958
ATE1	15.0868317845203	12.6565691772807
ATF1	12.0226653573157	12.7031935525075
ATF2	16.1091083880944	11.2153979686558
ATF3	14.5410895008309	5.79835618112916
ATF4	49.3020731960567	54.7522759874443
ATF5	51.2824596309636	72.9428562419476
ATF6	13.8614427769242	10.6139363724284
ATF6B	10.5582394396204	8.88688395708598
ATF7	14.109205738341	8.26945105341868
ATF7IP	24.4419171063182	18.3571268471232
ATF7IP2	22.5454984512481	12.0748576849053
ATG10	5.67400126824028	3.69673088996523
ATG101	40.5812084144936	54.7655975030844
ATG12	18.0270450827881	11.5886138795047
ATG13	23.3417800279717	19.6191282063367
ATG14	23.8884580945774	18.4031794057145
ATG16L1	15.4895592582904	19.2182960265887
ATG16L2	36.3339085170079	29.0683138307302
ATG2A	32.1160051376825	33.5370751439504
ATG2B	11.8064038230893	11.9624166556689
ATG3	15.8293519436903	20.9152489869471
ATG4A	10.8081172257673	6.51697197316405
ATG4B	38.6568969521929	42.6389487723599
ATG4C	11.4774440380373	12.0746530956528
ATG4D	22.7433735884678	26.139909215347
ATG5	9.55746541543646	7.68186503424606
ATG7	9.44613611030481	10.3644106862854
ATG9A	20.2493459342038	17.3987016753714
ATG9B	2.12608040875831	0.794212770741978
ATHL1	83.0929333143492	78.3099301710661
ATIC	32.7474614754847	61.6953070252864
ATL1	3.0053183102261	1.05432273851559
ATL2	7.62742332913103	14.2900170960557
ATL3	11.0837561917025	20.2673271042344
ATM	27.7697623794719	14.6034357358885
ATMIN	15.5196253588903	13.2797853193768
ATN1	32.7044389544687	38.5231305791451
ATOH1	0.127636487281542	0
ATOH7	0.178976772817435	0
ATOH8	2.7318342620077	0.834666974692764
ATOX1	36.1375698652955	41.202673891683
ATP10A	20.2566613344471	11.8327428914279
ATP10B	0.240890086754125	0.107707316141487
ATP10D	1.14339553174922	0.474920152484502
ATP11A	25.48281326007	30.3629885308847
ATP11AUN	0	0
ATP11B	26.994336923319	17.7076688129884
ATP11C	14.4706214791768	13.4471654458217
ATP12A	0.10921225947095	0
ATP13A1	47.3274090078377	51.7219210100532
ATP13A2	23.429861266289	34.9221517328109
ATP13A3	10.1694298270692	14.5145900689471
ATP13A4	0.153973410181056	0
ATP13A5	0	0
ATP1A1	30.3963531018778	39.3522276539207
ATP1A1-AS1	5.46826681184564	2.48342686795197
ATP1A2	0.546280745967216	0.346026886719786
ATP1A3	24.410242061945	52.5878358525185
ATP1A4	2.35127107381349	0.868787265611648
ATP1B1	7.97060854780665	4.07032475414808
ATP1B2	0.775127346981393	0.826919794914191
ATP1B3	17.6401420017734	39.7870460407428
ATP1B4	1.16766126485408	0.721584107650871
ATP2A1	7.87270143879194	5.45280312125386
ATP2A1-AS1	2.79314093742826	10.9103146400044
ATP2A2	27.1008290549753	34.8950978909995
ATP2A3	92.3007764899102	95.8502031901542
ATP2B1	39.7230596051508	34.5008221097696
ATP2B2	0.0966805540219361	0.017497058249429
ATP2B3	0.0201024636135525	0.0254667328143863
ATP2B4	34.6926686697515	16.977795896423
ATP2C1	19.3101231137655	18.0352518765128
ATP2C2	1.46662369116525	0.554136438376863
ATP4A	1.96413345818065	2.67604817218653
ATP4B	0	0
ATP5A1	43.6927046640564	62.1526633594489
ATP5B	73.3137611509024	105.211073928123
ATP5C1	30.8058367662367	33.8014346694793
ATP5D	29.8888515171791	82.1263779750684
ATP5E	0	0
ATP5EP2	0.369382768899028	0.467951215464349
ATP5F1	29.5105256889752	37.5410740815035
ATP5G1	23.9881515802663	56.2468668395909
ATP5G2	33.9832147387105	38.2680105090845
ATP5G3	14.9127949801119	20.4748143533672
ATP5H	44.8010226458885	58.6940225493032
ATP5I	18.5908174747064	24.3114419704772
ATP5J	14.9987645297395	21.6586309478499
ATP5J2	34.3157315169758	56.952684916162
ATP5J2-PTCD1	0	0
ATP5L	26.8738578091888	28.2264405336597
ATP5L2	2.55193101917726	1.50868877476366
ATP5O	11.3033775188256	15.0603138132526
ATP5S	17.5073059587754	11.3910614939493
ATP5SL	30.3564455242868	32.7668931609309
ATP6AP1	29.1731952321426	23.9054877206561
ATP6AP1L	7.171999954718	3.39656898009626
ATP6AP2	25.0183175990507	24.8678860174655
ATP6V0A1	28.8615976124374	12.2936248481038
ATP6V0A2	14.9140747494754	13.9351615350565
ATP6V0A4	0	0.0512976012186119
ATP6V0B	30.7741460345708	31.8282363435122
ATP6V0C	0	2.23825894122996
ATP6V0CP3	0	0
ATP6V0D1	61.7076990377382	55.1162212085794
ATP6V0D2	2.00744728414324	1.23523325060969
ATP6V0E1	37.1426519366405	38.4632554606615
ATP6V0E2	10.7496752265742	15.0149240287418
ATP6V0E2-AS1	0.575799011538921	0.0561114523593614
ATP6V1A	27.6548012297795	22.0586863591117
ATP6V1B1	1.30903412070046	0.785531893369449
ATP6V1B2	21.0329752193596	26.7586926309416
ATP6V1C1	18.1831646883844	14.8536772908684
ATP6V1C2	3.14659395728801	1.86025051085827
ATP6V1D	18.5157714855433	11.8236710210793
ATP6V1E1	45.278703196346	43.6337030858031
ATP6V1E2	5.42632433422563	5.65608543401072
ATP6V1F	42.7597854974228	44.4742668033975
ATP6V1G1	28.3509873425369	26.2958954894826
ATP6V1G2	0.811647941357671	0.184161177033291
ATP6V1G2-DDX39B	0	0
ATP6V1G3	1.00245471205636	0
ATP6V1H	18.0164176425628	19.9389727131287
ATP7A	7.87187383497562	2.99923449563217
ATP7B	0.640340801937292	0.208003439172461
ATP8A1	23.3018446781856	20.725829714702
ATP8A2	0.256257317652659	0.0590252090114414
ATP8B1	14.7678447070698	8.64365876582151
ATP8B2	24.1497738781475	22.9782537266555
ATP8B3	3.96568999261671	2.18863838266861
ATP8B4	0.185616102350718	0.176360312428075
ATP8B5P	0.0225989790448615	0.0572588685921464
ATP9A	0.0536506481863605	0.0906228376744535
ATP9B	11.9743161924558	7.94360679430749
ATPAF1	18.0654264224372	21.28569171904
ATPAF2	25.8866367836509	21.9575723943304
ATPIF1	24.2207639592264	28.4475444355844
ATR	12.7090758924322	13.9800425619974
ATRAID	30.045245648817	32.6427772046375
ATRIP	2.86957559951582	4.47681866491147
ATRN	12.0192609223615	12.583605334049
ATRNL1	4.6883696959381	3.17779173383874
ATRX	25.9915840683089	16.4027516522754
ATXN1	11.8433755885428	10.6442645426562
ATXN10	20.4897297136007	38.2393410376213
ATXN1L	25.7696708264632	17.1856656375758
ATXN2	15.4845384109568	14.4572163853428
ATXN2L	60.5917729065572	81.0335697380501
ATXN3	9.81478157999272	6.19327170764731
ATXN3L	0.0776315585121886	0
ATXN7	19.1201901195265	11.6417463518671
ATXN7L1	10.3074635085058	6.21705779725976
ATXN7L2	17.6107347633804	15.5527105930723
ATXN7L3	54.2683495276765	43.9523694489664
ATXN7L3B	37.1766401324079	36.1062108931449
ATXN8OS	0.277037076674271	0
AUH	13.0978740780252	13.5839018831548
AUNIP	7.4528932857337	12.1989727823719
AUP1	52.1339833429137	55.7305760367325
AURKA	14.4098437054603	17.5789447568233
AURKAIP1	26.119559979058	75.7537640576399
AURKAPS1	5.4833033540665	1.90468627452503
AURKB	30.1738868328964	36.3207444876045
AURKC	1.35828375589004	0.926550600335251
AUTS2	33.3891558526461	38.7482903361819
AVEN	8.43476263926192	13.7224936443419
AVIL	2.48122320473596	1.78927934562274
AVL9	18.5849187489079	16.0913847468527
AVP	0	0
AVPI1	3.02724039339088	3.46391474435679
AVPR1A	0.243016220836137	0.175922408163331
AVPR1B	0.153336558324695	0
AVPR2	8.05436265457132	3.84598738252194
AWAT1	0.0971643023265491	0
AWAT2	0	0
AXDND1	0.0696972443795123	0.0294319000668057
AXIN1	36.6201636419329	53.6379491561758
AXIN2	6.99350742850515	6.55757279535862
AXL	1.08324100924374	0.598182019604611
AZGP1	0.322370416493697	0
AZGP1P1	2.07531082373805	0.938964270942641
AZI2	17.4623236313649	10.9343874107227
AZIN1	33.6705816684372	33.6253298412965
AZIN2	7.68160605643558	2.77278664162433
AZU1	1.04334431215339	0.188822420275088
B2M	67.124218455396	63.5903371656534
B3GALNT1	0.112001806334668	0.0945927202916124
B3GALNT2	9.20593234768134	11.8159558379948
B3GALT1	0	0
B3GALT2	0.459750368505667	0.145608269975378
B3GALT4	4.06347336377464	1.1235269989322
B3GALT5	0.0364822487801509	0
B3GALT5-AS1	0.558118490234297	0.235683458883504
B3GALT6	13.9730410172062	38.0555627430061
B3GALTL	0.0590883977199922	0.112283882171841
B3GAT1	0	0.0449741570360095
B3GAT2	0	0
B3GAT3	37.391463149701	47.7045963527317
B3GNT2	31.0534141228232	23.177969260686
B3GNT3	0.545915096204185	0.125743736612545
B3GNT4	1.6268560247255	0.572493508280852
B3GNT5	0	0
B3GNT6	1.36041692308689	0.758313258686823
B3GNT7	36.1487658020601	28.3130494304454
B3GNT8	1.74086905811964	3.03244373564517
B3GNT9	6.13079807485795	4.39268660372301
B3GNTL1	3.23168758287886	7.72752247872895
B4GALNT1	0.213108625461119	0.385679837157627
B4GALNT2	0	0
B4GALNT3	0.0315170088001025	0.0399272078114724
B4GALNT4	0.39355199465791	6.88026477305775
B4GALT1	56.0370990356827	54.2988346304181
B4GALT2	7.84767020770223	50.7741541496822
B4GALT3	34.597208406417	32.9396484802273
B4GALT4	7.01432902080146	4.09483807048842
B4GALT5	26.283611822451	26.8855643961645
B4GALT6	7.09508708712101	6.24193419136372
B4GALT7	32.0897218353806	33.2460355229217
B4GAT1	8.20850597553395	17.6365613650563
B9D1	5.83719581889006	11.9847249101748
B9D2	15.9533229229252	17.370930085598
BAALC	0	0.165955072879101
BAALC-AS1	0.137444751218243	0.0870606912491811
BAALC-AS2	0	0
BAAT	0.847653882371465	0.439301141048164
BABAM1	34.4438306011328	36.6326870178266
BACE1	5.03538663570262	3.6043126177161
BACE1-AS	7.34310670233444	4.75946361859217
BACE2	0.681253887177625	0.172608801160254
BACH1	14.0961425568979	7.95663062063048
BACH2	13.8634823369492	4.71330944297029
BAD	18.9116796480309	30.2354481573903
BAG1	24.2235724893701	34.6457930887386
BAG2	8.43968873299548	19.7153554802417
BAG3	13.4398389157376	16.9591786549602
BAG4	8.80031277731841	11.6115636726154
BAG5	21.4222320545507	20.7145454678029
BAG6	9.02432401764252	10.5267700101806
BAGE	0.419545860971735	0.177166715319836
BAGE3	0	0
BAHCC1	0.437509445577859	0.436687528485603
BAHD1	29.488683508334	39.3789137695138
BAIAP2	3.2566782749273	6.95154047153865
BAIAP2-AS1	9.19337815595969	5.25849725950437
BAIAP2L1	9.81531542861939	4.45764972551325
BAIAP2L2	3.929061657436	4.0141269764774
BAIAP3	15.135490811185	4.29030014331438
BAK1	50.9092174464081	42.4050927262828
BAMBI	0.0788473659830871	0
BANCR	0.201382013266433	0
BANF1	37.9951220342528	44.9948092313845
BANF2	0	0
BANK1	0.373721931642905	0.172163006539245
BANP	14.5837057902755	21.0653119346465
BAP1	50.9838362233811	51.6618141872641
BARD1	12.9958939941407	16.0654832090952
BARHL1	0.142561991562498	0.722416559164679
BARHL2	0	0
BARX1	0	0.199543507868923
BARX2	0.230785838633009	0.194913466090413
BASP1	44.9416329402407	58.2500333169356
BASP1P1	1.76995910097451	1.94329740866445
BATF	12.4364105001239	29.1284697013298
BATF2	10.4657896808996	1.62824268037302
BATF3	6.51258345655207	18.6073812567108
BAX	71.6461406274725	79.2476873679369
BAZ1A	33.7345306983064	33.8878269963123
BAZ1B	37.9011487355692	48.3247059936469
BAZ2A	53.6120841251858	41.7486126322357
BAZ2B	2.65682142383415	0.625499782601139
BBC3	22.3202403248046	41.3458910679297
BBIP1	6.07829857115148	2.52008849693971
BBOX1	0	0
BBS1	13.5932858954842	13.1264903694764
BBS10	13.5060278503834	8.45890715132429
BBS12	0.910971956865201	1.30459126735515
BBS2	12.539060121565	7.7521281753121
BBS4	12.5463951327814	8.36001787867025
BBS5	5.33914301881547	13.3095582955258
BBS7	4.62030857380189	4.85389065939062
BBS9	2.7770969585729	1.77437391061841
BBX	23.7586242953179	17.0997712279058
BCAM	0.35657118350148	0.15057363505469
BCAN	4.59822263625022	3.57168098084789
BCAP29	11.7698506933678	4.97019749478434
BCAP31	31.0330859133133	36.0080257482183
BCAR1	12.951463799556	9.20919122422037
BCAR3	13.1605687813579	8.31730634555294
BCAR4	0.519224060178923	0.526221687672667
BCAS1	7.53240298627486	2.29500694308632
BCAS2	7.94073580366488	7.28004043120555
BCAS3	10.5159995427905	4.84442026212703
BCAS4	30.059055992901	34.9979957542667
BCAT1	13.8763962793444	23.388500996092
BCAT2	21.8339389906546	33.9048168422537
BCCIP	15.8371616393304	23.4000858962835
BCDIN3D	3.68177641982952	3.498183786149
BCDIN3D-AS1	2.46510365980284	1.84028483180021
BCHE	0	0
BCKDHA	32.63253052811	41.0666249501304
BCKDHB	5.45635667679727	8.02576675143381
BCKDK	24.7261931642306	37.7597231115077
BCL10	17.6922922093287	10.2080904321914
BCL11A	11.4196912818654	12.6253370581769
BCL11B	0.0521815197523386	0.0220353227499527
BCL2	11.8065141111105	7.47851970079495
BCL2A1	27.5325302867178	18.626741064337
BCL2L1	62.7112931776205	58.7123710572
BCL2L10	2.758502211034	4.85360899917926
BCL2L11	23.0201815229385	22.5930342147565
BCL2L12	22.2747121816758	30.931968578509
BCL2L13	15.4120902000752	14.5450949925478
BCL2L14	1.4482192908488	0.948967931433947
BCL2L15	2.44945918901678	1.16749862570088
BCL2L2	15.6366731610231	12.989680291338
BCL2L2-PABPN1	0	0
BCL3	33.8373640316774	38.8017917715503
BCL6	1.8124381193979	0.606511864672283
BCL6B	0.190382155398939	0.241184940183306
BCL7A	53.8753819013268	57.4020157636268
BCL7B	24.5631283878906	23.1618416810759
BCL7C	26.3385974345394	47.6903325673232
BCL9	25.4278483768299	15.5578121118434
BCL9L	36.6621706692628	39.3016127572622
BCLAF1	21.1772669429961	22.0190825653086
BCO1	0	0.0642559877951046
BCO2	2.72266953419987	1.0166074898049
BCOR	19.5803564145479	17.721481043923
BCORL1	23.2874499148382	10.2634710455035
BCORP1	0.222354731114791	0.187792854188528
BCR	26.2993643199345	27.1136031229337
BCRP2	0.582402994665133	0
BCRP3	11.2561946362606	2.90031237542535
BCS1L	16.8322114278041	38.8513643278206
BCYRN1	30.2073019899649	15.3072042036338
BDH1	10.2806363915427	28.9421928219967
BDH2	6.42422415608501	5.01284726702905
BDKRB1	0.104483365837696	0
BDKRB2	0.0789274837885569	0.0749917465339876
BDNF	0.0527621395865605	0
BDNF-AS	0.895634290807585	0.464167243371645
BDP1	13.0754019983163	12.7078428582596
BEAN1	0	0.0489221725258183
BECN1	26.3360853645179	24.5483913841603
BEGAIN	1.48763730730333	2.70912386298922
BEND2	0.984181687492469	0.880099049186782
BEND3	8.59275279579408	13.471373969752
BEND3P3	7.96768615833281	5.11963924378293
BEND4	11.8975439930294	12.4351784652257
BEND5	0	0
BEND6	0.426047616435166	0.0599707634653945
BEND7	0.251590484728614	0.0749944680635298
BEST1	3.52485472023859	2.93880000917504
BEST2	0.213507108306035	0.180320468367414
BEST3	0.254412987001389	0.161151082997268
BEST4	0.32426731620907	0.739434363367329
BET1	4.38283120652484	3.29843985233929
BET1L	38.5357698931521	34.1965323950429
BEX1	0	0
BEX2	0	0
BEX4	0.106031871259627	0
BEX5	0	0
BFAR	24.3901876402707	26.1449864766305
BFSP1	0.090380890262528	0.0572493508280852
BFSP2	15.9675129522601	6.24855891153871
BGLAP	1.74592662877779	1.89584639219318
BGN	0	0.0704607394807202
BHLHA15	4.44098828971785	14.9212626203746
BHLHA9	0	0
BHLHB9	1.42886677247557	0.402256592597244
BHLHE22	0.0400155604812606	0
BHLHE23	0	0
BHLHE40	55.8053153929052	49.3208963781934
BHLHE40-AS1	6.75163206729348	2.47094769843426
BHLHE41	21.612605352344	12.7560035030282
BHMG1	0	0
BHMT	0.163119430745811	0.0688824189163521
BHMT2	1.99976669152729	1.49405472941918
BICC1	0	0
BICD1	11.8202486047689	9.72024980894366
BICD2	28.2416616251254	38.5692160157411
BID	26.7425080049091	34.3787027259471
BIK	29.5258151140108	34.6941879116989
BIN1	41.7758379284556	42.5257810134874
BIN2	17.3098022639125	2.99029908472417
BIN3	37.9022319229798	31.0474357053942
BIN3-IT1	3.99150319932652	1.21733475518295
BIRC2	21.9914824569381	13.6069022126674
BIRC3	24.8384260503423	23.1700844879223
BIRC5	11.8221594112035	16.3687610421981
BIRC6	26.2048633330982	21.6162348242469
BIRC7	0	0.119091319011674
BIRC8	0	0
BIVM	6.29996519386865	5.26553106139422
BIVM-ERCC5	0	0
BLCAP	36.7660921661325	34.1022211761074
BLID	0	0
BLK	41.3584972116617	39.6967185078535
BLM	13.9781083105104	16.4176456409707
BLMH	20.7355208575183	40.7945740724553
BLNK	60.0097468143094	50.3052676440537
BLOC1S1	9.17690187036909	9.65350355518497
BLOC1S1-RDH5	0	0
BLOC1S2	16.4329791818696	11.5000613773019
BLOC1S3	14.9003326162039	17.1543716339762
BLOC1S4	10.9027648838295	19.6043106877069
BLOC1S5	0.0912301066811021	0.173361792574712
BLOC1S5-TXNDC5	0	0
BLOC1S6	21.045841851606	15.7021945458474
BLVRA	16.7746932327252	13.0436920926709
BLVRB	28.5840123970462	39.8327072004606
BLZF1	13.5148356620895	5.69201520426309
BMF	28.7057879207693	18.0567663651593
BMI1	0.0396305711238607	4.0164675752975
BMP1	1.83383283581575	4.13010568732109
BMP10	0	0
BMP15	0	0
BMP2	0	0
BMP2K	41.0845097716236	33.5222871140412
BMP3	1.87281057855468	0.420454248704626
BMP4	0	0
BMP5	0	0
BMP6	0.262672191217086	0.776452387140845
BMP7	20.4781969334567	38.5074679538285
BMP8A	2.89938554471757	1.2243586725267
BMP8B	5.04684771889008	3.44916850949003
BMPER	0	0
BMPR1A	17.6306722482912	12.0010851541211
BMPR1B	0.0226668098974224	0
BMPR2	12.2051210309725	8.00003426404764
BMS1	13.2926391646944	20.2847083538462
BMS1P17	0	0
BMS1P18	0	0
BMS1P20	29.1764286396114	19.9115658632248
BMS1P4	5.27785573802361	4.33893799452445
BMS1P6	0.0139161403516423	0
BMX	0	0
BNC1	0	0
BNC2	0.139642102297109	0.110565680443583
BNIP1	14.6269216952843	13.9593137330484
BNIP2	36.3891060476458	30.6059420332612
BNIP3	20.8959163463782	20.3043749924458
BNIP3L	27.5583913568948	15.0085721023159
BNIPL	2.27790839246228	2.55020646806448
BOC	0.0920434661696257	0.0777366199259137
BOD1	11.1754522098345	23.3288440487128
BOD1L1	22.1900335652012	15.7224389390398
BOD1L2	0	0
BOK	0.564889100303462	4.29376619614586
BOK-AS1	0.658270503413279	0
BOLA1	14.2753294118271	34.1598926948071
BOLA2	0	0
BOLA3	19.3839275404919	39.1659963152544
BOLA3-AS1	2.91979887969828	1.93166687891918
BOLL	0.193196217957422	0.0489499850173054
BOP1	2.57774068814492	8.63570148656332
BORA	10.781191721468	9.61758823270283
BPESC1	0	0
BPGM	16.2731973665654	8.83527463535158
BPHL	7.16930483260525	9.08240771612476
BPI	0	0
BPIFA1	0	0
BPIFA2	0	0
BPIFA3	0	0
BPIFA4P	0	0
BPIFB1	1.04196378630348	0.385002341436015
BPIFB2	0	0
BPIFB3	0	0
BPIFB4	0.12505322810933	0
BPIFB6	0	0
BPIFC	0.179173364175978	0.226985123845624
BPNT1	22.4253314651223	21.0621780717412
BPTF	36.4024362043273	26.4843417257297
BPY2	0	0
BRAF	12.2274974959379	9.35267059285161
BRAP	17.9867774322025	17.7228204852268
BRAT1	30.3256294180174	52.1340076017718
BRCA1	11.4269593111674	12.444086629049
BRCA2	3.45025436834265	4.29532034345776
BRCC3	21.0019048794487	17.972391020126
BRD1	26.3104024690911	33.6841187882683
BRD2	10.0161468568082	10.6680728183792
BRD3	33.3546170524322	36.7583378077112
BRD4	36.7995910390899	46.0558078552348
BRD7	26.9866705277995	32.2513920748059
BRD7P3	0.220939226257362	0.0699740135273792
BRD8	13.6039556646329	15.409332332151
BRD9	23.3105503234393	32.1354256399129
BRDT	0.503330753967571	0.297566608500657
BRDTP1	0	0
BRE	19.7591797817881	18.5088886056012
BRE-AS1	7.78397926504521	0.934210021469513
BREA2	5.83344604297227	3.43724645291178
BRF1	21.0081752394303	27.7477428085395
BRF2	17.6033052346521	18.1677379891879
BRI3	13.763810987363	16.2021818687656
BRI3BP	23.0829383130864	45.6237719630713
BRICD5	10.1316416612305	21.5448559609708
BRINP1	0	0
BRINP2	0.0682222629635343	0.0432135626827805
BRINP3	0	0
BRIP1	4.24145865427893	6.380765782609
BRIX1	11.7189773985165	15.5377343874235
BRK1	44.270650492946	44.0765478184991
BRMS1	46.6153592072413	48.2698768921407
BRMS1L	9.47548293789779	6.70435111810991
BROX	19.6762479841405	11.0691816462735
BRPF1	33.9832147387105	36.6047118289625
BRPF3	31.1128206484915	17.4544718353791
BRS3	0	0
BRSK1	16.5725846328985	8.30253594586123
BRSK2	0.0209256248391075	0.212076412919803
BRWD1	10.3858967231228	5.2750607514786
BRWD1-AS1	0.786876173399955	0.498425607209494
BRWD3	16.4522924509762	7.14563999038469
BSCL2	2.04056254782096	1.1268294087548
BSDC1	27.582218365889	18.7242749964928
BSG	41.883948977536	61.9511396699188
BSN	0.494022546486675	0.766127536665988
BSN-AS2	3.08107517415893	1.58776224932045
BSND	0	0
BSPH1	0	0
BSPRY	3.64726154776621	1.8335396858058
BST1	0.459232631604196	0.349066312076109
BST2	82.515153998147	99.3990177120949
BSX	0	0
BTAF1	30.3029078721404	33.5786389171842
BTBD1	29.6655904953121	33.4467064495053
BTBD10	12.6136274934898	12.0379111313761
BTBD11	0.550191751873627	0.247325567332509
BTBD16	0.146875050194319	0.0930340612052298
BTBD17	0.081008855157832	0
BTBD18	1.96262131573218	0.810762934514502
BTBD19	13.8673105958819	6.31176715788199
BTBD2	37.9954577306209	57.6878010483674
BTBD3	5.366105376889	5.76705004023715
BTBD6	25.1752854028092	31.3732204928529
BTBD7	11.1629233453945	6.74805451760211
BTBD8	0.531878151304581	0.192516542527535
BTBD9	9.66531385225415	6.23155943005831
BTC	0	0
BTD	5.46741019412465	2.60533134277716
BTF3	38.50630456848	54.3595060941766
BTF3L4	12.2377633088787	11.163907007227
BTF3P11	0	0
BTG1	34.2155786001718	19.3179860742975
BTG2	78.5712984073175	58.7571352799942
BTG3	7.58972675469319	15.8809842859218
BTG4	0	0
BTK	52.1871760916093	50.2346400302431
BTLA	11.8809124000966	8.2487500102008
BTN1A1	0.470681644580478	0.178884398155347
BTN2A1	21.9354668286033	12.691349786643
BTN2A2	23.159793606176	13.7116116421677
BTN2A3P	5.65453820199302	1.0638759099519
BTN3A1	27.5044295857089	17.463032712628
BTN3A2	32.0231217980743	23.4693079783142
BTN3A3	24.0440866439111	14.2835795387839
BTNL2	0	0
BTNL3	0.213395382974634	0.135169581860974
BTNL8	0.0563102149771509	0.0713363907584425
BTNL9	40.1350027265772	34.4655954927228
BTRC	10.849929689452	9.05171306331039
BUB1	23.4400352135129	24.9568061894516
BUB1B	10.7820047826838	21.6346165348138
BUB3	27.801980207009	32.5609303799001
BUD13	21.7274208289266	27.7327811098968
BUD31	14.3302712753599	15.9498070909475
BVES	1.19795676632054	0.981994048833428
BVES-AS1	0	0
BYSL	15.9840648218257	46.7292791643595
BZRAP1	4.82068985381552	3.40027529075264
BZRAP1-AS1	24.4760733029726	11.484231229802
BZW1	33.3441191222017	35.1076923885469
BZW2	1.90448839166154	12.1137353756866
C10orf10	11.547694328688	5.51728112679519
C10orf105	1.57036338881759	0.209411488395882
C10orf107	0	0
C10orf11	0	0
C10orf111	1.50684032680397	0.904232453686069
C10orf113	0	0
C10orf12	4.72549872714303	4.2056922440677
C10orf120	0	0
C10orf128	3.91956982168548	3.0344677936719
C10orf131	3.46767497333781	0.732168568413607
C10orf142	0	0
C10orf2	13.7189833872522	42.6761617856924
C10orf25	4.90915679911634	1.07226679508643
C10orf32	12.3930573667248	8.41581914891776
C10orf32-ASMT	0	0
C10orf35	0.126331653303757	0
C10orf53	0	0
C10orf54	38.7606580845464	14.0348108938094
C10orf55	0.865469854069827	0.342630416416395
C10orf62	0	0
C10orf67	0.461885351528516	0.643651552905091
C10orf71	0.0771469120061533	0
C10orf76	25.0002390944919	19.8699285335631
C10orf82	1.17538140038774	0.670062440820546
C10orf88	7.92611422477214	8.70234641314458
C10orf90	0	0
C10orf91	3.49962645005691	8.86697804478787
C10orf95	2.31335702782236	8.90923049292505
C10orf99	0	0
C11orf1	6.63632717881566	9.72968890343427
C11orf16	0.423686833106002	0.626203808330474
C11orf21	9.37467992792015	3.04519977525871
C11orf24	47.4665644495024	55.3812026492079
C11orf30	7.92821552758888	5.91672951455411
C11orf31	35.6114676860058	45.5134993612682
C11orf40	0	0
C11orf42	0.951411086298108	1.05463021088028
C11orf44	0.0383233320989124	0.0485497736935101
C11orf45	0.246064135682414	0.0445322077297337
C11orf49	24.949701960066	17.1661091445023
C11orf53	0	0
C11orf54	14.7429667921172	7.19667063305171
C11orf57	12.8962565847813	14.2453814357116
C11orf58	25.5813345118535	26.0905142001007
C11orf63	8.05606229313117	2.18377233883363
C11orf65	1.88567898429516	0.623182318302341
C11orf68	33.6778456717388	36.2539046928169
C11orf70	1.19716689231646	1.24087624148753
C11orf71	2.43280284482939	2.31149056766282
C11orf73	16.0455267808611	17.5146462352269
C11orf74	5.30469693482311	2.63209243013703
C11orf80	13.4413403093782	15.6214428109956
C11orf84	42.4226974402669	57.4312875717673
C11orf85	0.298753536164488	0.189237414605363
C11orf86	0	0
C11orf87	0.0228958832667748	0
C11orf88	1.31547928020815	0.944355743208053
C11orf91	0	0.17518417832236
C11orf94	6.6488898401825	1.40385364639305
C11orf95	19.1650232886888	25.5439998489518
C11orf96	0	0
C11orf97	0	0
C12orf10	21.7013281191374	33.9858163850268
C12orf29	4.49325734193111	9.94648707386435
C12orf4	12.2086856825114	9.46930346454173
C12orf40	0.279314093742826	0.196582245765845
C12orf42	1.31813681410756	0.469652856247855
C12orf43	20.7517386965817	25.2286026167458
C12orf45	21.4170742404735	29.6238698715823
C12orf49	28.9010402822908	22.6505251391608
C12orf5	9.05668166653538	7.7047812040175
C12orf50	2.05540545023119	1.12705379630682
C12orf54	0.124938289480553	0
C12orf56	0.438695257115673	0.0793942126744492
C12orf57	14.5534064605928	13.827697477632
C12orf60	1.20721899604656	2.29404148256057
C12orf65	12.2090233849384	13.9965066899925
C12orf66	3.45060334269984	7.4843397476421
C12orf71	0.562868981179471	0.713068518802817
C12orf73	7.56697459578108	9.24074576736419
C12orf74	10.7300315004455	1.5992119208102
C12orf75	10.7472538558733	15.2539763705685
C12orf76	6.46798516496928	4.66321984926949
C12orf77	3.70886535909704	0.894964299476208
C12orf79	4.06018768563972	2.04336144494089
C12orf80	0	0
C14orf1	22.4200949185259	23.3708207037623
C14orf105	0.563138039009862	0.548776441334864
C14orf119	14.0779361566135	12.2210743238689
C14orf132	0.968004006799615	0.749413103072537
C14orf142	22.4242981609178	28.4081404544479
C14orf159	38.4783489634077	29.7778133723287
C14orf166	38.6716696741178	50.4657112898108
C14orf177	0	0
C14orf178	2.94591335196252	1.59943697174192
C14orf180	0	0
C14orf183	1.95185643627466	1.05972952179003
C14orf2	16.4837454923891	20.3676665668548
C14orf28	3.3224822061226	0.86926538218032
C14orf37	0.220550879861832	0
C14orf39	0	0
C14orf79	5.04735437624795	4.46719654722019
C14orf80	14.4070746298037	36.1976347742249
C14orf93	13.089446104937	9.27820124876352
C15orf26	0	0
C15orf27	9.05101650254189	9.44903712015311
C15orf32	0	0
C15orf38-AP3S2	0	0
C15orf39	47.228725473887	59.5777080856846
C15orf40	12.590166906209	10.6332047272983
C15orf41	4.48381695643707	4.52106081746505
C15orf43	0	0
C15orf48	0	0.180698895373432
C15orf52	0.782937476152409	0.259773247421789
C15orf53	0.133071814933766	0
C15orf54	0	0
C15orf56	0.255633021071635	0
C15orf57	17.7717024477294	12.1470972853403
C15orf59	0	0
C15orf61	1.04805596726941	4.77981318617709
C15orf62	15.7223547706805	9.12899527807076
C15orf65	2.53066492735078	0.686992209937022
C16orf13	34.1450395707996	89.7931532302447
C16orf45	1.56711664892431	0.220588446572434
C16orf46	2.1983750774368	2.0887525951724
C16orf52	7.77432295582286	5.10682289289343
C16orf54	31.4174558447247	22.0232695302667
C16orf58	33.7264663650424	37.5741209259642
C16orf59	9.21011055437797	32.6167906017528
C16orf62	15.0678217603599	12.8123973076027
C16orf70	13.3377129526784	10.3539476142382
C16orf71	3.31543558426444	3.88195450286168
C16orf72	13.9041652663033	18.0039496539347
C16orf74	50.3118273946573	35.7082773646641
C16orf78	0	0
C16orf82	0	0
C16orf86	6.45130821393723	4.90368978885254
C16orf87	7.76478370024044	6.59936406826945
C16orf89	0.712809957812492	0.993322768851433
C16orf90	0	0.190493415144779
[truncated: 21,400 more rows]
