# Supplementary material for: Integrative analysis of RNA polymerase II and transcriptional dynamics upon MYC activation
Source: HighWire-hosted journal article supplement (doi:10.1101/gr.226035.117), 2017-09-13
Supplement: Supplemental_Code.zip [file RNAseq_aligned_reads.xls]

sample	Unassigned_Ambiguity	Assigned_Exons	Assigned_Introns	Unassigned_NoFeatures
rep1_TotalRNA_0min	1018243	44215327	9936928	13596101
rep1_TotalRNA_10min	1075392	48682555	10203687	15161495
rep1_TotalRNA_20min	1115027	48572236	11305225	15563948
rep1_TotalRNA_30min	1136216	47969301	11676797	16401348
rep1_TotalRNA_1h	1103063	45601471	11586072	14722232
rep1_TotalRNA_1_5h	1381965	54810243	15304506	17172653
rep1_TotalRNA_2h	1407311	59796647	14029559	18201339
rep1_TotalRNA_4h	1454548	65110201	13320225	18159538
rep1_TotalRNA_8h	1079087	47230981	9963924	13839511
rep1_TotalRNA_12h	1199967	50983294	11334626	15171199
rep1_TotalRNA_16h	1263990	54698600	11288329	17032378
rep2_TotalRNA_0min	1028737	44682883	10076979	11746355
rep2_TotalRNA_10min	1287737	55936698	12666198	16695582
rep2_TotalRNA_20min	1337002	60870694	12142045	15142921
rep2_TotalRNA_30min	1638319	70400078	16090222	21736569
rep2_TotalRNA_1h	1210336	56039238	10561624	17255960
rep2_TotalRNA_1_5h	1193728	55007668	10198030	15326916
rep2_TotalRNA_2h	1067507	47043480	9868747	13505350
rep2_TotalRNA_4h	1240223	49784900	12907241	16829732
rep2_TotalRNA_8h	1176009	51732628	10308611	14361969
rep2_TotalRNA_12h	1239070	54280454	10585823	16222552
rep2_TotalRNA_16h	1148279	47076911	10794642	16249847
rep3_TotalRNA_0min	1372248	62430440	12230354	16929274
rep3_TotalRNA_10min	1135294	51475863	9955461	14363177
rep3_TotalRNA_20min	1290103	53247098	13278968	14754873
rep3_TotalRNA_30min	1544821	61619008	16846743	18640862
rep3_TotalRNA_1h	1264868	59189893	10398587	19174999
rep3_TotalRNA_1_5h	1281835	54516643	12385981	16014301
rep3_TotalRNA_2h	973024	44077010	8667847	13018355
rep3_TotalRNA_4h	1483095	64623370	13734568	19189952
rep3_TotalRNA_8h	1187500	53187321	10054132	14167573
rep3_TotalRNA_12h	1342488	55724372	12864102	15914812
rep3_TotalRNA_16h	1118167	47553780	10031164	14697655
rep1_4sUlabeledRNA_0min	1978091	16374911	41329598	8397307
rep1_4sUlabeledRNA_10min	1801826	15016592	37432877	7430514
rep1_4sUlabeledRNA_20min	2178314	18719818	44571245	8731577
rep1_4sUlabeledRNA_30min	2085659	16522810	43569910	8274001
rep1_4sUlabeledRNA_1h	2118986	16814354	44608296	8029068
rep1_4sUlabeledRNA_1_5h	2085113	16584038	43776471	7751329
rep1_4sUlabeledRNA_2h	1965922	16489049	40820768	7378879
rep1_4sUlabeledRNA_4h	1787192	15335175	36859072	7763151
rep1_4sUlabeledRNA_8h	1539985	12882476	31900942	6416523
rep1_4sUlabeledRNA_12h	1691434	13996842	34980830	6824831
rep1_4sUlabeledRNA_16h	2275700	19769147	45788340	9287473
rep2_4sUlabeledRNA_0min	1836702	13411207	38816609	5969427
rep2_4sUlabeledRNA_10min	1919393	14291798	40465672	6646683
rep2_4sUlabeledRNA_20min	1927761	14150979	40873088	6211982
rep2_4sUlabeledRNA_30min	2171885	15451206	45929055	6706378
rep2_4sUlabeledRNA_1h	1477432	12194589	30421017	5509136
rep2_4sUlabeledRNA_1_5h	2011677	15065644	41684325	6405273
rep2_4sUlabeledRNA_2h	1850481	14837508	38319031	6549290
rep2_4sUlabeledRNA_4h	1864218	14012225	39155545	7244195
rep2_4sUlabeledRNA_8h	1721949	14890668	34848920	6861448
rep2_4sUlabeledRNA_12h	2032419	15912442	41715907	8525347
rep2_4sUlabeledRNA_16h	2021510	16024368	41908060	7597830
rep3_4sUlabeledRNA_0min	1018457	10631796	19941180	5357665
rep3_4sUlabeledRNA_10min	1123836	9911022	22436192	5175498
rep3_4sUlabeledRNA_20min	1073084	8941042	21952308	4373782
rep3_4sUlabeledRNA_30min	1162838	9275025	24031166	4678388
rep3_4sUlabeledRNA_1h	1488839	14384380	29801161	8022856
rep3_4sUlabeledRNA_1_5h	1291510	10470757	26705284	6118813
rep3_4sUlabeledRNA_2h	1537788	13202331	31771821	6429056
rep3_4sUlabeledRNA_4h	1502144	13314627	30526719	7674921
rep3_4sUlabeledRNA_8h	1230764	12208306	24398348	6257238
rep3_4sUlabeledRNA_12h	1215589	10650141	24523601	5997373
rep3_4sUlabeledRNA_16h	1355467	13448272	26802240	7173694
