# Supplementary material for: Integrative analysis of RNA polymerase II and transcriptional dynamics upon MYC activation
Source: HighWire-hosted journal article supplement (doi:10.1101/gr.226035.117), 2017-09-13

total mRNA

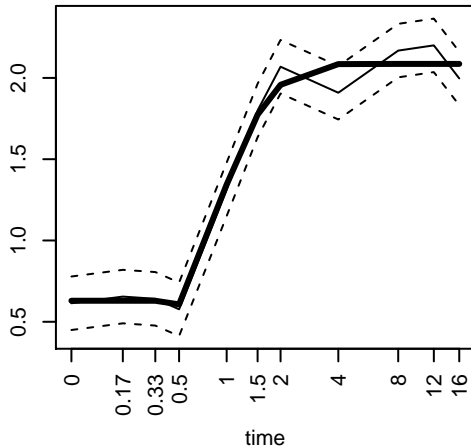

pre-mRNA

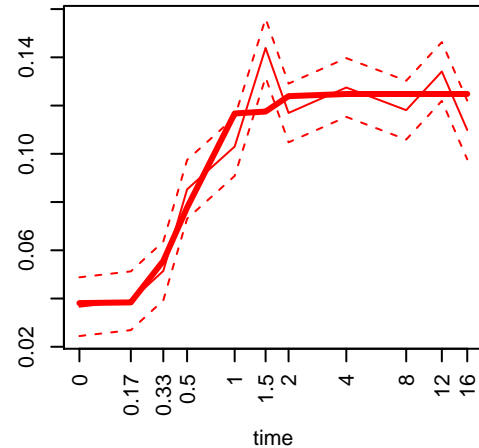

synthesis

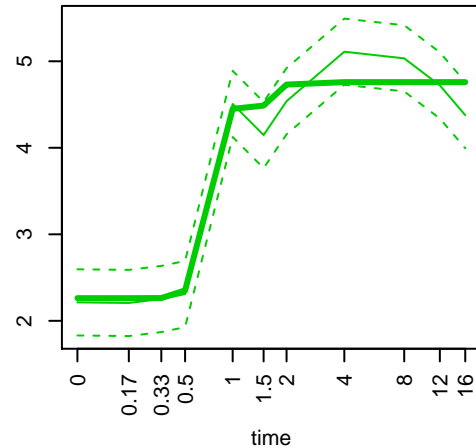

degradation

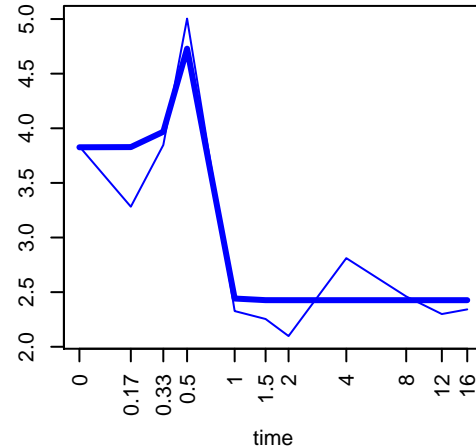

processing

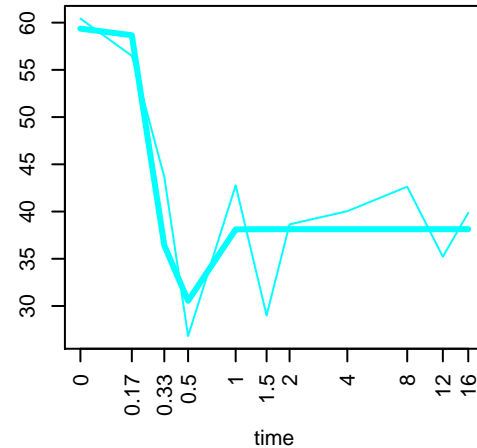

total mRNA

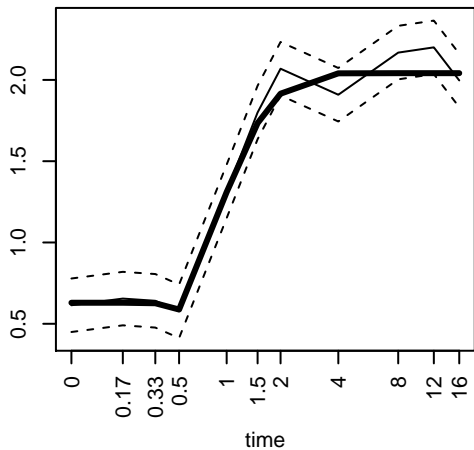

pre-mRNA

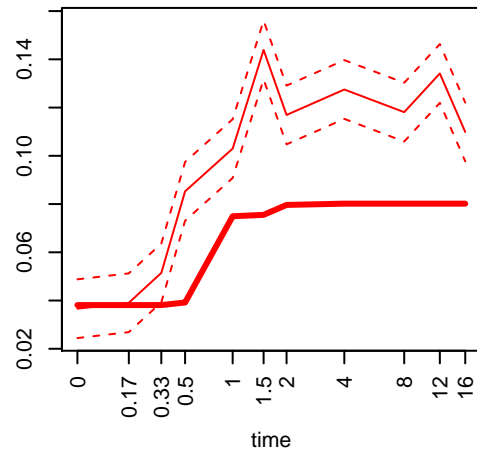

synthesis

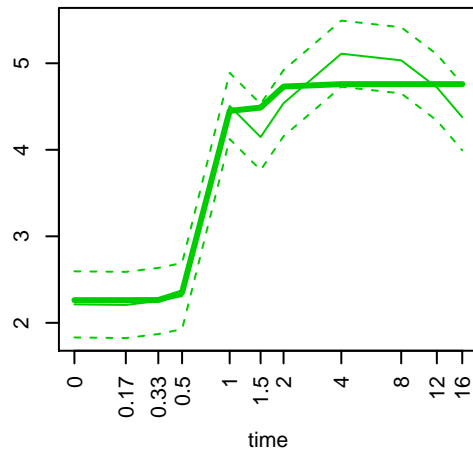

degradation

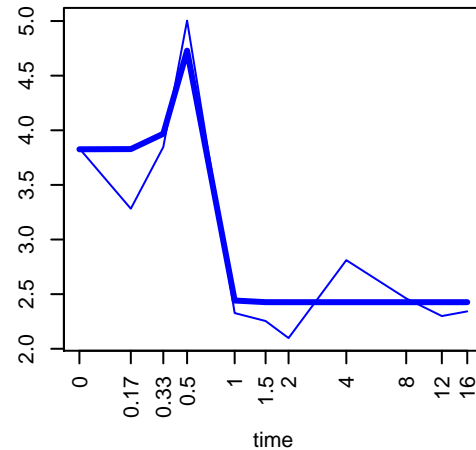

processing

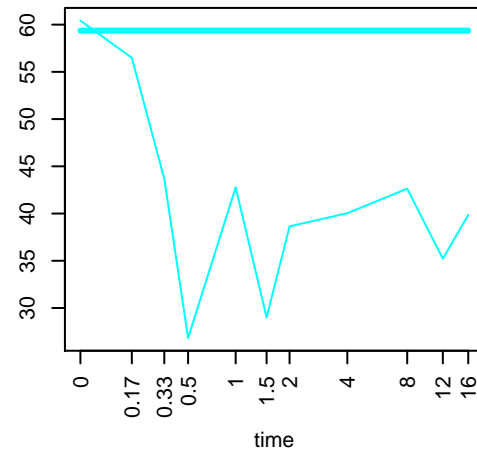

Supplement: Supplemental_Code.zip [file S4E.pdf › dePretis2017_GR_code/figures/S4E.pdf]
