# Supplementary material for: Integrative analysis of RNA polymerase II and transcriptional dynamics upon MYC activation
Source: HighWire-hosted journal article supplement (doi:10.1101/gr.226035.117), 2017-09-13
Supplement: Supplemental_Code.zip [file u2os_RNAseq.xls]

ensembl_gene_id	hgnc_symbol	logFC	padj	
ENSG00000145416	MARCH1	-0.077886897	1	
ENSG00000186205	MARC1	0.556677839	0.289393139	
ENSG00000099785	MARCH2	-1.164160425	0.000229057	
ENSG00000117791	MARC2	-0.081186641	1	
ENSG00000173926	MARCH3	0.418537462	0.159707623	
ENSG00000144583	MARCH4	-0.252754816	0.135199791	
ENSG00000198060	MARCH5	0.316425218	0.039090324	
ENSG00000145495	MARCH6	-0.145878192	0.529985771	
ENSG00000136536	MARCH7	-0.106632582	0.977165278	
ENSG00000165406	MARCH8	-0.036954064	1	
ENSG00000139266	MARCH9	-0.935806034	0.000122162	
ENSG00000173838	MARCH10	-0.124111681	1	
ENSG00000183654	MARCH11	-1.206204642	0.922847702	
ENSG00000180096	SEPT1	-0.696896613	0.112020743	
ENSG00000168385	SEPT2	-0.161862207	0.436514927	
ENSG00000100167	SEPT3	-0.056091528	1	
ENSG00000108387	SEPT4	-0.525544089	1	
ENSG00000184702	SEPT5	-0.355109504	0.002461062	
ENSG00000125354	SEPT6	-0.11513561	1	
ENSG00000122545	SEPT7	-0.454003313	0.000221595	
ENSG00000164402	SEPT8	-1.098698748	1.05E-18	
ENSG00000184640	SEPT9	0.296120589	0.010273759	
ENSG00000186522	SEPT10	-0.811076186	1.15E-11	
ENSG00000138758	SEPT11	0.059286053	1	
ENSG00000140623	SEPT12	0.7203379	1	
ENSG00000154997	SEPT14	0.362980176	1	
ENSG00000173077	DEC1	-0.786143704	0.584003536	
ENSG00000121410	A1BG	-0.152141122	1	
ENSG00000268895	A1BG-AS1	0.05099842	1	
ENSG00000148584	A1CF	1.070741266	0.139833432	
ENSG00000175899	A2M	-0.659350061	0.386374062	
ENSG00000245105	A2M-AS1	-1.156794017	0.37811862
ENSG00000166535	A2ML1	0.118356078	1
ENSG00000256661	A2ML1-AS1	-0.028121216	1
ENSG00000256904	A2ML1-AS2	-1.790042574	1
ENSG00000256069	A2MP1	-0.21049066	0.176093421
ENSG00000184389	A3GALT2P	-0.595667537	1
ENSG00000128274	A4GALT	-0.483992086	0.496210763
ENSG00000118017	A4GNT	1.968064759	1
ENSG00000094914	AAAS	0.008755213	1
ENSG00000253937	AACP	0	1
ENSG00000081760	AACS	0.525044407	1.38E-05
ENSG00000250420	AACSP1	-0.355859629	1
ENSG00000114771	AADAC	-0.073250072	1
ENSG00000197953	AADACL2	1.968408083	1
ENSG00000188984	AADACL3	-3.733400699	0.320796081
ENSG00000204518	AADACL4	2.170975352	0.783919238
ENSG00000109576	AADAT	1.04341331	5.04E-15
ENSG00000158122	AAED1	-0.254095137	0.530411784
ENSG00000103591	AAGAB	-0.049364262	1
ENSG00000115977	AAK1	-0.160603441	0.491414503
ENSG00000087884	AAMDC	-0.13360854	0.769800681
ENSG00000127837	AAMP	0.488160499	6.08E-06
ENSG00000129673	AANAT	0.353740794	0.81271848
ENSG00000131043	AAR2	0.591258231	7.42E-07
ENSG00000205002	AARD	-0.450316946	0.343575739
ENSG00000090861	AARS	-0.202323877	0.189959549
ENSG00000124608	AARS2	0.206747249	0.372205618
ENSG00000266967	AARSD1	0.4074881	0.003022881
ENSG00000157426	AASDH	-0.214062284	0.397385111
ENSG00000149313	AASDHPPT	0.321593984	0.049977511
ENSG00000008311	AASS	0.039800837	1
ENSG00000108270	AATF	0.517648848	3.26E-06
ENSG00000181409	AATK	-0.46883418	0.688581822
ENSG00000225180	AATK-AS1	-0.153889009	1
ENSG00000183044	ABAT	-0.360546967	0.510657852
ENSG00000165029	ABCA1	-0.684728191	0.18756724
ENSG00000154263	ABCA10	-0.542764936	1
ENSG00000251595	ABCA11P	0.235157984	0.84754753
ENSG00000144452	ABCA12	-0.74643139	0.22722414
ENSG00000179869	ABCA13	-0.334772761	0.0320345
ENSG00000238098	ABCA17P	0.377348302	0.10212587
ENSG00000107331	ABCA2	-0.198333407	0.249189338
ENSG00000167972	ABCA3	0.426980343	0.000178318
ENSG00000198691	ABCA4	-0.701202065	0.183171571
ENSG00000154265	ABCA5	0.045738165	1
ENSG00000154262	ABCA6	0.894264875	1
ENSG00000064687	ABCA7	-1.737948361	2.30E-10
ENSG00000141338	ABCA8	-0.258486836	1
ENSG00000154258	ABCA9	1.536132143	0.597492478
ENSG00000231749	ABCA9-AS1	-0.597502825	1
ENSG00000085563	ABCB1	1.417261852	7.01E-32
ENSG00000135776	ABCB10	-0.047477548	1
ENSG00000259689	ABCB10P1	-0.663960224	1
ENSG00000261524	ABCB10P3	-0.273730977	1
ENSG00000260053	ABCB10P4	0.592186819	1
ENSG00000073734	ABCB11	1.095646074	1
ENSG00000005471	ABCB4	-0.033009328	1
ENSG00000004846	ABCB5	0.114364566	1
ENSG00000115657	ABCB6	-0.374770055	0.659562653
ENSG00000131269	ABCB7	0.037426361	1
ENSG00000197150	ABCB8	-0.216252299	0.530426505
ENSG00000150967	ABCB9	-0.120941725	0.857311545
ENSG00000103222	ABCC1	0.54740189	2.00E-06
ENSG00000124574	ABCC10	0.137565734	0.983779104
ENSG00000121270	ABCC11	0.035587231	1
ENSG00000140798	ABCC12	-0.15432004	1
ENSG00000243064	ABCC13	0.441865599	1
ENSG00000023839	ABCC2	-0.292109089	0.915692796
ENSG00000108846	ABCC3	-1.522578916	4.06E-10
ENSG00000125257	ABCC4	0.379186516	0.022728224
ENSG00000114770	ABCC5	0.381082788	0.002460307
ENSG00000223882	ABCC5-AS1	-0.294551698	1
ENSG00000091262	ABCC6	-0.279986626	0.954120814
ENSG00000256340	ABCC6P1	-1.178264793	0.122328838
ENSG00000255277	ABCC6P2	-0.597051498	1
ENSG00000006071	ABCC8	-0.183892218	1
ENSG00000069431	ABCC9	0.177419156	1
ENSG00000101986	ABCD1	-1.137650456	5.75E-10
ENSG00000215151	ABCD1P2	-0.596217142	1
ENSG00000261233	ABCD1P3	-2.008978171	0.783919238
ENSG00000225293	ABCD1P4	-1.469143661	1
ENSG00000214330	ABCD1P5	-0.1542121	1
ENSG00000173208	ABCD2	-0.571266549	1
ENSG00000117528	ABCD3	-0.181895066	0.451954598
ENSG00000119688	ABCD4	0.135483824	0.828761796
ENSG00000164163	ABCE1	0.196376798	0.3033952
ENSG00000204574	ABCF1	0.35118491	0.001924421
ENSG00000206490	ABCF1	0	1
ENSG00000225989	ABCF1	0	1
ENSG00000231129	ABCF1	0	1
ENSG00000232169	ABCF1	0	1
ENSG00000236149	ABCF1	0	1
ENSG00000236342	ABCF1	0	1
ENSG00000033050	ABCF2	0.565586949	1.32E-06
ENSG00000161204	ABCF3	0.207496891	0.25625064
ENSG00000160179	ABCG1	0.604145438	0.216292641
ENSG00000118777	ABCG2	0.650549164	0.001308903
ENSG00000172350	ABCG4	-0.178618228	1
ENSG00000138075	ABCG5	0.800647076	0.87943317
ENSG00000143921	ABCG8	0.892581573	1
ENSG00000143994	ABHD1	-0.516865124	0.63257863
ENSG00000144827	ABHD10	-0.328115987	0.052960779
ENSG00000106077	ABHD11	-0.684163601	0.000839833
ENSG00000100997	ABHD12	-0.273681627	0.042252478
ENSG00000131969	ABHD12B	-0.776678656	0.320796081
ENSG00000139826	ABHD13	-0.011715405	1
ENSG00000248487	ABHD14A	-0.113369337	1
ENSG00000114786	ABHD14A-ACY1	-0.193130528	0.452245783
ENSG00000114779	ABHD14B	-0.167789796	0.460716266
ENSG00000168792	ABHD15	-0.674036626	0.007226109
ENSG00000204427	ABHD16A	-0.236308579	0.383458229
ENSG00000206403	ABHD16A	0	1
ENSG00000224552	ABHD16A	0	1
ENSG00000230475	ABHD16A	0	1
ENSG00000231488	ABHD16A	0	1
ENSG00000235676	ABHD16A	0	1
ENSG00000236063	ABHD16A	0	1
ENSG00000183260	ABHD16B	0.261402547	0.633286106
ENSG00000140526	ABHD2	-0.615295917	9.99E-08
ENSG00000158201	ABHD3	0.082583657	1
ENSG00000100439	ABHD4	-1.493803355	1.50E-19
ENSG00000011198	ABHD5	0.119618579	1
ENSG00000163686	ABHD6	0.681124481	4.48E-05
ENSG00000127220	ABHD8	0.032552159	1
ENSG00000136754	ABI1	-0.181868164	0.46155928
ENSG00000138443	ABI2	-0.223437116	0.196767153
ENSG00000108798	ABI3	-1.454945721	1.06E-11
ENSG00000154175	ABI3BP	-0.44524257	1
ENSG00000097007	ABL1	-0.238596694	0.125405822
ENSG00000143322	ABL2	0.063323381	1
ENSG00000099204	ABLIM1	-1.633114069	8.43E-46
ENSG00000163995	ABLIM2	-0.412235856	0.607341379
ENSG00000173210	ABLIM3	-0.643183894	3.58E-05
ENSG00000175164	ABO	-1.76380098	0.783919238
ENSG00000002726	ABP1	0.707666632	0.970311513
ENSG00000159842	ABR	-0.576814421	1.19E-06
ENSG00000174429	ABRA	-1.789943949	1
ENSG00000146386	ABRACL	-0.130283605	1
ENSG00000146109	ABT1	0.399259075	0.010742208
ENSG00000250496	ABT1P1	0.667574971	0.610076568
ENSG00000114626	ABTB1	-1.2932789	5.14E-13
ENSG00000166016	ABTB2	0.306246429	0.08127109
ENSG00000060971	ACAA1	-0.192738374	0.552684367
ENSG00000167315	ACAA2	-0.742424534	1.05E-07
ENSG00000132142	ACACA	0.390910228	0.000565383
ENSG00000076555	ACACB	-0.911008076	0.001657795
ENSG00000111271	ACAD10	-0.083270181	1
ENSG00000240303	ACAD11	0.370350221	0.042649911
ENSG00000151498	ACAD8	0.195059524	0.616632481
ENSG00000177646	ACAD9	-0.358356612	0.011535163
ENSG00000115361	ACADL	-0.0005508	1
ENSG00000117054	ACADM	0.033042923	1
ENSG00000122971	ACADS	-0.283991571	0.699834212
ENSG00000196177	ACADSB	-0.159258246	1
ENSG00000072778	ACADVL	0.041563733	1
ENSG00000157766	ACAN	-1.292136156	3.61E-06
ENSG00000072818	ACAP1	-0.490638569	0.271026352
ENSG00000114331	ACAP2	-0.043038921	1
ENSG00000229325	ACAP2-IT1	-0.595667537	1
ENSG00000131584	ACAP3	-0.405257787	0.006566619
ENSG00000075239	ACAT1	0.111520347	1
ENSG00000120437	ACAT2	-0.496292722	0.00018405
ENSG00000182827	ACBD3	0.00325382	1
ENSG00000181513	ACBD4	-0.53947959	0.061426034
ENSG00000107897	ACBD5	0.076075296	1
ENSG00000135847	ACBD6	0.236354654	0.17632042
ENSG00000176244	ACBD7	-0.498538483	1
ENSG00000110455	ACCS	-0.408353273	0.311849571
ENSG00000205126	ACCSL	-1.790042574	1
ENSG00000102977	ACD	0.114506026	0.976948862
ENSG00000159640	ACE	-0.398272616	1
ENSG00000130234	ACE2	0.981735162	1
ENSG00000224353	ACE3P	-1.789943949	1
ENSG00000167769	ACER1	0.582376657	1
ENSG00000177076	ACER2	-0.040369182	1
ENSG00000078124	ACER3	0.055241007	1
ENSG00000087085	ACHE	0.824186071	4.62E-06
ENSG00000100813	ACIN1	0.103791326	0.877661862
ENSG00000131473	ACLY	0.214168584	0.114159399
ENSG00000153086	ACMSD	-0.156645811	1
ENSG00000196636	ACN9	0.301450118	0.284894914
ENSG00000122729	ACO1	0.158648742	0.527635653
ENSG00000100412	ACO2	0.130364208	0.641411733
ENSG00000184227	ACOT1	-0.159701662	1
ENSG00000162390	ACOT11	-0.05219294	1
ENSG00000172497	ACOT12	-0.159991633	1
ENSG00000112304	ACOT13	-0.649936081	0.011699916
ENSG00000119673	ACOT2	-0.230560202	0.347182669
ENSG00000177465	ACOT4	0.047813645	1
ENSG00000205669	ACOT6	1.700328929	0.433230769
ENSG00000097021	ACOT7	0.024595604	1
ENSG00000101473	ACOT8	-0.596563885	0.00042328
ENSG00000123130	ACOT9	-0.011097509	1
ENSG00000161533	ACOX1	-0.017007472	1
ENSG00000168306	ACOX2	-0.002581562	1
ENSG00000087008	ACOX3	0.508349897	0.011729034
ENSG00000153093	ACOXL	-0.057310103	1
ENSG00000143727	ACP1	0.182053014	0.44683905
ENSG00000134575	ACP2	-0.407960471	0.016339567
ENSG00000102575	ACP5	0.772964545	1
ENSG00000162836	ACP6	-0.134938512	1
ENSG00000155893	ACPL2	0.215505218	0.715146472
ENSG00000014257	ACPP	-0.449416377	1
ENSG00000142513	ACPT	1.434872853	0.272170359
ENSG00000100312	ACR	0.720436311	1
ENSG00000111644	ACRBP	-1.16474113	0.069522472
ENSG00000147174	ACRC	1.72068262	7.91E-10
ENSG00000134940	ACRV1	-0.108748967	1
ENSG00000103740	ACSBG1	0.778339056	4.15E-08
ENSG00000130377	ACSBG2	-0.403792066	0.922847702
ENSG00000167107	ACSF2	-1.817221276	1.81E-19
ENSG00000176715	ACSF3	0.283737628	0.111164535
ENSG00000151726	ACSL1	1.094101793	9.10E-25
ENSG00000123983	ACSL3	-0.278818954	0.045876882
ENSG00000068366	ACSL4	-0.074290361	1
ENSG00000197142	ACSL5	-0.422104046	0.681001958
ENSG00000164398	ACSL6	0.332981588	1
ENSG00000166743	ACSM1	-0.073962394	1
ENSG00000183747	ACSM2A	-0.596403481	1
ENSG00000066813	ACSM2B	-1.098371521	1
ENSG00000005187	ACSM3	0.259080043	0.188665193
ENSG00000215009	ACSM4	0.289857288	0.964264594
ENSG00000183549	ACSM5	1.096475855	1
ENSG00000154930	ACSS1	0.595850152	1
ENSG00000131069	ACSS2	-0.874477372	1.88E-07
ENSG00000111058	ACSS3	-0.82077265	0.013878923
ENSG00000143632	ACTA1	-0.371905905	0.018579294
ENSG00000107796	ACTA2	-0.300209265	0.4990859
ENSG00000075624	ACTB	-0.401206324	9.41E-05
ENSG00000169067	ACTBL2	0.529025077	0.474158914
ENSG00000229145	ACTBP1	-0.427436165	0.004047729
ENSG00000188460	ACTBP11	-0.353328629	0.004575367
ENSG00000233125	ACTBP12	-0.183116743	0.663237425
ENSG00000234667	ACTBP13	0	1
ENSG00000229001	ACTBP14	-0.180951573	1
ENSG00000213763	ACTBP2	-0.311409227	0.006254506
ENSG00000203413	ACTBP6	-1.044912719	0.104073246
ENSG00000185607	ACTBP7	-0.288399008	0.11029506
ENSG00000220267	ACTBP8	-0.199353564	0.575575724
ENSG00000266920	ACTBP9	-0.689381448	6.60E-08
ENSG00000159251	ACTC1	-0.523807791	0.016285939
ENSG00000184009	ACTG1	-0.321193007	0.003301743
ENSG00000178631	ACTG1P1	-0.505049921	0.004755808
ENSG00000231340	ACTG1P10	-0.504019977	2.86E-05
ENSG00000229465	ACTG1P11	-0.393021609	0.031766773
ENSG00000226642	ACTG1P12	-0.415809728	0.001359108
ENSG00000229129	ACTG1P2	-0.309313722	0.074642013
ENSG00000215388	ACTG1P3	-0.436991894	0.371968786
ENSG00000236085	ACTG1P4	-0.441993537	0.000708789
ENSG00000229349	ACTG1P9	-0.383705094	0.006322018
ENSG00000163017	ACTG2	0.151624695	1
ENSG00000182584	ACTL10	1.396000118	1
ENSG00000136518	ACTL6A	-0.120655514	0.861620651
ENSG00000077080	ACTL6B	0.981735162	1
ENSG00000187003	ACTL7A	-2.564566651	1
ENSG00000148156	ACTL7B	-1.789943949	1
ENSG00000117148	ACTL8	1.87751371	8.58E-10
ENSG00000181786	ACTL9	-2.565017808	1
ENSG00000072110	ACTN1	-0.286403372	0.013423668
ENSG00000259062	ACTN1-AS1	-0.570732078	1
ENSG00000077522	ACTN2	1.347394318	6.01E-11
ENSG00000248746	ACTN3	0.009393441	1
ENSG00000130402	ACTN4	-0.504233623	1.02E-06
ENSG00000213493	ACTN4P1	-0.32114083	0.08754887
ENSG00000214141	ACTN4P2	-0.271377988	1
ENSG00000131966	ACTR10	-0.340722889	0.076095566
ENSG00000138107	ACTR1A	-0.36752558	0.003077317
ENSG00000115073	ACTR1B	-0.81698192	1.80E-11
ENSG00000138071	ACTR2	-0.54793777	3.36E-07
ENSG00000115091	ACTR3	-0.347178318	0.002666402
ENSG00000133627	ACTR3B	-0.141224975	1
ENSG00000226481	ACTR3BP2	0	1
ENSG00000260327	ACTR3BP3	0	1
ENSG00000249283	ACTR3BP4	0	1
ENSG00000227264	ACTR3BP5	0	1
ENSG00000226444	ACTR3BP6	0	1
ENSG00000106526	ACTR3C	-1.887132612	0.001132261
ENSG00000232267	ACTR3P2	-0.168643201	0.76950579
ENSG00000242573	ACTR3P3	-0.528686505	1
ENSG00000101442	ACTR5	0.396968127	0.010052065
ENSG00000075089	ACTR6	0.745194854	0.001759747
ENSG00000248915	ACTR6P1	0	1
ENSG00000113812	ACTR8	-0.023922285	1
ENSG00000123165	ACTRT1	0	1
ENSG00000169717	ACTRT2	0	1
ENSG00000184378	ACTRT3	0	1
ENSG00000115170	ACVR1	-0.589947682	0.000225885
ENSG00000135503	ACVR1B	0.288497291	0.070258296
ENSG00000123612	ACVR1C	-0.932941443	0.503513495
ENSG00000121989	ACVR2A	-0.084488165	1
ENSG00000114739	ACVR2B	0.422106372	0.088427153
ENSG00000229589	ACVR2B-AS1	0.882134876	0.101562429
ENSG00000139567	ACVRL1	-1.837178537	0.000102366
ENSG00000243989	ACY1	-0.193130528	0.452245783
ENSG00000132744	ACY3	-0.810554649	0.712824192
ENSG00000119640	ACYP1	-0.176873948	0.951179508
ENSG00000170634	ACYP2	-0.053834438	1
ENSG00000196839	ADA	-0.307316433	0.187455895
ENSG00000164113	ADAD1	-0.225568995	1
ENSG00000267511	ADAD1P2	0	1
ENSG00000140955	ADAD2	0	1
ENSG00000168803	ADAL	-0.20713084	1
ENSG00000137845	ADAM10	-0.140727005	0.577770954
ENSG00000073670	ADAM11	0.61815014	0.000669019
ENSG00000148848	ADAM12	-0.999463254	1.29E-15
ENSG00000143537	ADAM15	0.407930405	0.00021791
ENSG00000151694	ADAM17	-0.220296445	0.219275251
ENSG00000168619	ADAM18	-0.408726275	1
ENSG00000135074	ADAM19	-0.500889428	1.34E-05
ENSG00000229186	ADAM1A	0.992125329	0.020883734
ENSG00000226469	ADAM1B	-1.790494539	1
ENSG00000104755	ADAM2	0.416571405	1
ENSG00000134007	ADAM20	1.968064759	1
ENSG00000259158	ADAM20P1	-0.729340502	0.970311513
ENSG00000248574	ADAM20P2	0	1
ENSG00000249162	ADAM20P3	0	1
ENSG00000139985	ADAM21	0.230248322	1
ENSG00000235812	ADAM21P1	1.492405338	1
ENSG00000008277	ADAM22	0.335212978	0.319825531
ENSG00000114948	ADAM23	-0.02537818	1
ENSG00000214607	ADAM24P	0	1
ENSG00000042980	ADAM28	-0.651884456	1
ENSG00000168594	ADAM29	-0.420311733	1
ENSG00000134249	ADAM30	0	1
ENSG00000197140	ADAM32	-0.081354814	1
ENSG00000149451	ADAM33	0	1
ENSG00000197475	ADAM3A	1.03431609	0.688581822
ENSG00000260089	ADAM3B	0	1
ENSG00000196115	ADAM5	0.23430082	1
ENSG00000233988	ADAM6	0	1
ENSG00000069206	ADAM7	-0.509457001	1
ENSG00000151651	ADAM8	-0.330267111	0.926069059
ENSG00000168615	ADAM9	-0.66219684	1.19E-10
ENSG00000134028	ADAMDEC1	-0.153762488	1
ENSG00000154734	ADAMTS1	0.574887393	0.000747785
ENSG00000142303	ADAMTS10	-1.579354285	8.38E-16
ENSG00000151388	ADAMTS12	-0.871204893	5.11E-15
ENSG00000160323	ADAMTS13	0.465947098	0.017229468
ENSG00000138316	ADAMTS14	0.985748271	0.014434578
ENSG00000166106	ADAMTS15	-1.146943338	0.001028447
ENSG00000145536	ADAMTS16	-0.588865839	0.003196785
ENSG00000140470	ADAMTS17	1.421521155	4.71E-13
ENSG00000140873	ADAMTS18	1.486500443	0.006328078
ENSG00000145808	ADAMTS19	0.60793406	0.605975498
ENSG00000087116	ADAMTS2	-0.382099912	0.293687231
ENSG00000173157	ADAMTS20	0.155737177	1
ENSG00000156140	ADAMTS3	-0.035815878	1
ENSG00000158859	ADAMTS4	2.77133639	1
ENSG00000154736	ADAMTS5	-1.013704931	1
ENSG00000049192	ADAMTS6	0.262572834	0.062788204
ENSG00000136378	ADAMTS7	-0.192699342	1
ENSG00000134917	ADAMTS8	0.446959854	0.766038248
ENSG00000163638	ADAMTS9	0.903269096	0.003525254
ENSG00000241158	ADAMTS9-AS1	0.206279569	1
ENSG00000241684	ADAMTS9-AS2	0.700860267	0.196528092
ENSG00000178031	ADAMTSL1	-0.69848785	0.000286412
ENSG00000197859	ADAMTSL2	1.395561056	1
ENSG00000156218	ADAMTSL3	-0.478333228	0.021320812
ENSG00000143382	ADAMTSL4	-1.03157553	2.60E-05
ENSG00000185761	ADAMTSL5	-1.020300638	1.03E-07
ENSG00000105963	ADAP1	0.268368509	0.410779231
ENSG00000184060	ADAP2	0.322549496	1
ENSG00000160710	ADAR	-0.149028344	0.470206805
ENSG00000197381	ADARB1	0.669575544	1.63E-05
ENSG00000185736	ADARB2	1.203525162	0.000208027
ENSG00000205696	ADARB2-AS1	0.981389048	0.663237425
ENSG00000065457	ADAT1	-0.255330891	0.21965654
ENSG00000189007	ADAT2	0.958108657	8.97E-10
ENSG00000213638	ADAT3	0.030193314	1
ENSG00000142920	ADC	-0.339266097	0.541546652
ENSG00000063761	ADCK1	-0.157171587	1
ENSG00000133597	ADCK2	0.163993157	0.855398248
ENSG00000163050	ADCK3	1.497650194	3.54E-35
ENSG00000123815	ADCK4	-0.114635315	1
ENSG00000173137	ADCK5	-0.179908798	0.680283291
ENSG00000164742	ADCY1	-0.227739925	0.62556929
ENSG00000143199	ADCY10	-0.251066244	1
ENSG00000161912	ADCY10P1	-0.633586608	0.075658201
ENSG00000078295	ADCY2	-0.309828	1
ENSG00000138031	ADCY3	0.083330576	1
ENSG00000129467	ADCY4	0.232932825	1
ENSG00000173175	ADCY5	-0.708385763	0.000202703
ENSG00000174233	ADCY6	-0.299161296	0.043918722
ENSG00000121281	ADCY7	0.119791266	0.759942834
ENSG00000155897	ADCY8	-0.03180226	1
ENSG00000162104	ADCY9	0.56564852	0.000107826
ENSG00000141433	ADCYAP1	0.981392441	1
ENSG00000078549	ADCYAP1R1	2.2576351	1.03E-49
ENSG00000087274	ADD1	-0.559197782	1.28E-06
ENSG00000075340	ADD2	-0.58659338	0.206799809
ENSG00000148700	ADD3	-1.078254781	1.90E-14
ENSG00000118492	ADGB	-0.727257412	6.94E-07
ENSG00000187758	ADH1A	-0.693255689	1
ENSG00000196616	ADH1B	1.968064759	1
ENSG00000248144	ADH1C	1.968408083	1
ENSG00000198099	ADH4	0.237517429	1
ENSG00000197894	ADH5	-0.756450451	1.44E-11
ENSG00000232676	ADH5P2	-0.811325139	0.000986398
ENSG00000223694	ADH5P3	-0.429671839	0.162107856
ENSG00000233859	ADH5P4	-0.819753932	3.08E-09
ENSG00000172955	ADH6	0.126734082	1
ENSG00000196344	ADH7	2.170634739	0.783919238
ENSG00000147576	ADHFE1	0.181926254	0.569582018
ENSG00000182551	ADI1	-0.346784579	0.056669211
ENSG00000182035	ADIG	-0.666322412	1
ENSG00000181092	ADIPOQ	1.870477364	1
ENSG00000226482	ADIPOQ-AS1	0	1
ENSG00000159346	ADIPOR1	-0.020752949	1
ENSG00000232497	ADIPOR1P1	0.537605914	1
ENSG00000258805	ADIPOR1P2	-0.03850219	1
ENSG00000006831	ADIPOR2	0.081953075	1
ENSG00000156110	ADK	0.024086885	1
ENSG00000148926	ADM	0.078731206	1
ENSG00000128165	ADM2	-0.122651791	1
ENSG00000224420	ADM5	0.110296443	1
ENSG00000101126	ADNP	-0.332040448	0.006059359
ENSG00000101544	ADNP2	0.463825718	3.30E-05
ENSG00000181915	ADO	0.274839014	0.118383437
ENSG00000163485	ADORA1	-1.279878473	1.66E-14
ENSG00000128271	ADORA2A	-0.156495055	1
ENSG00000178803	ADORA2A-AS1	0.03586034	1
ENSG00000170425	ADORA2B	0.243930228	0.286061273
ENSG00000121933	ADORA3	-0.102427586	1
ENSG00000159322	ADPGK	0.378506005	0.005607933
ENSG00000260898	ADPGK-AS1	0.435617794	0.519299562
ENSG00000144843	ADPRH	-0.110938492	1
ENSG00000153531	ADPRHL1	-0.277211083	1
ENSG00000116863	ADPRHL2	0.263158612	0.107755628
ENSG00000170222	ADPRM	0.853171737	0.06755203
ENSG00000120907	ADRA1A	-0.676156127	0.295383713
ENSG00000170214	ADRA1B	-0.348846127	0.001984736
ENSG00000171873	ADRA1D	0.895517951	1
ENSG00000150594	ADRA2A	1.968899115	1
ENSG00000222040	ADRA2B	0.162665241	1
ENSG00000184160	ADRA2C	0.555369418	0.005071087
ENSG00000043591	ADRB1	-0.847739366	1
ENSG00000169252	ADRB2	-0.217809813	1
ENSG00000188778	ADRB3	-1.790042574	1
ENSG00000173020	ADRBK1	0.318810891	0.018680227
ENSG00000100077	ADRBK2	0.097250289	1
ENSG00000130706	ADRM1	0.379148372	0.000557848
ENSG00000239900	ADSL	0.183438766	0.283448992
ENSG00000035687	ADSS	0.228152218	0.390500852
ENSG00000185100	ADSSL1	-0.23635069	1
ENSG00000111863	ADTRP	-0.360176954	0.280541449
ENSG00000106624	AEBP1	-0.266468194	0.037412272
ENSG00000139154	AEBP2	-0.0735314	1
ENSG00000181026	AEN	0.603537144	6.71E-09
ENSG00000104964	AES	-0.74277155	2.41E-12
ENSG00000196526	AFAP1	-0.400058459	0.001295811
ENSG00000157510	AFAP1L1	-0.26225417	0.184547411
ENSG00000169129	AFAP1L2	-1.571123498	0.015511828
ENSG00000172493	AFF1	-0.386450233	0.000821598
ENSG00000155966	AFF2	0.01626662	1
ENSG00000223516	AFF2-IT1	0	1
ENSG00000144218	AFF3	1.205544253	6.16E-11
ENSG00000072364	AFF4	0.103612883	0.882618134
ENSG00000223959	AFG3L1P	0.362343715	0.257963278
ENSG00000141385	AFG3L2	0.175160868	0.426088237
ENSG00000253606	AFG3L2P1	0.369401413	0.178757442
ENSG00000079557	AFM	1.968408083	1
ENSG00000183077	AFMID	0.521526975	0.002072205
ENSG00000081051	AFP	-0.334096297	1
ENSG00000119844	AFTPH	0.322387517	0.046392652
ENSG00000038002	AGA	-0.722334646	0.002802011
ENSG00000157985	AGAP1	-0.244952793	0.098766014
ENSG00000235529	AGAP1-IT1	-0.447589654	1
ENSG00000204172	AGAP10	0.762968699	9.62E-05
ENSG00000151303	AGAP11	0.78434922	1.15E-08
ENSG00000135439	AGAP2	-0.67688404	2.61E-06
ENSG00000133612	AGAP3	0.164785781	0.635677839
ENSG00000188234	AGAP4	0.688403803	0.00425287
ENSG00000172650	AGAP5	0.742631154	0.010425953
ENSG00000204149	AGAP6	0.623452453	0.000668541
ENSG00000204169	AGAP7	1.039307203	7.86E-06
ENSG00000174194	AGAP8	0.637267833	0.011069067
ENSG00000198035	AGAP9	0.475873392	0.004521597
ENSG00000166748	AGBL1	0.173924313	1
ENSG00000165923	AGBL2	-0.517367344	0.969894264
ENSG00000146856	AGBL3	0.038773987	1
ENSG00000186094	AGBL4	-0.308740007	0.304539244
ENSG00000225623	AGBL4-IT1	1.096574304	1
ENSG00000084693	AGBL5	-0.187752221	0.313935323
ENSG00000231636	AGBL5-AS1	0	1
ENSG00000229122	AGBL5-IT1	-0.29534494	1
ENSG00000204305	AGER	-0.458273583	0.263416608
ENSG00000206320	AGER	0	1
ENSG00000229058	AGER	0	1
ENSG00000230514	AGER	0	1
ENSG00000231268	AGER	0	1
ENSG00000234729	AGER	0	1
ENSG00000237405	AGER	0	1
ENSG00000173744	AGFG1	0.507493356	1.04E-05
ENSG00000106351	AGFG2	-0.417909669	0.082888654
ENSG00000164252	AGGF1	-0.218214672	0.422936739
ENSG00000214273	AGGF1P1	-1.177706294	0.060668137
ENSG00000233435	AGGF1P2	-0.719718759	1
ENSG00000241532	AGGF1P3	0.020161259	1
ENSG00000261689	AGGF1P4	0	1
ENSG00000006530	AGK	0.254973231	0.337975821
ENSG00000226555	AGKP1	0.243266783	1
ENSG00000162688	AGL	0.220030506	0.31934164
ENSG00000116771	AGMAT	-0.069337914	1
ENSG00000187546	AGMO	0.022685212	1
ENSG00000204310	AGPAT1	-0.33989021	0.012124549
ENSG00000206324	AGPAT1	0	1
ENSG00000226467	AGPAT1	0	1
ENSG00000227642	AGPAT1	0	1
ENSG00000228892	AGPAT1	0	1
ENSG00000235758	AGPAT1	0	1
ENSG00000236873	AGPAT1	0	1
ENSG00000169692	AGPAT2	-0.553081394	2.54E-05
ENSG00000160216	AGPAT3	0.984274129	0.243784579
ENSG00000026652	AGPAT4	0.500954525	0.000190059
ENSG00000155189	AGPAT5	0.374552593	0.004100523
ENSG00000234652	AGPAT5P1	-0.715015039	1
ENSG00000158669	AGPAT6	0.062091835	1
ENSG00000138678	AGPAT9	0.250445236	0.232043143
ENSG00000188266	AGPHD1	-0.272849314	1
ENSG00000018510	AGPS	-0.140376395	0.608696817
ENSG00000106541	AGR2	1.096915594	1
ENSG00000173467	AGR3	-0.221914955	1
ENSG00000188157	AGRN	-0.454410099	9.66E-06
ENSG00000159723	AGRP	0.17812081	1
ENSG00000135744	AGT	-2.07002053	2.48E-07
ENSG00000135049	AGTPBP1	0.2931274	0.175353262
ENSG00000144891	AGTR1	0.178955165	1
ENSG00000180772	AGTR2	0	1
ENSG00000177674	AGTRAP	-0.357195263	0.018614892
ENSG00000172482	AGXT	2.771679111	1
ENSG00000113492	AGXT2	2.336335809	5.01E-10
ENSG00000164089	AGXT2L1	-1.525811556	0.433230769
ENSG00000175309	AGXT2L2	0.276314423	0.027436303
ENSG00000153207	AHCTF1	0.677331128	3.99E-09
ENSG00000101444	AHCY	0.07692796	1
ENSG00000168710	AHCYL1	-0.256134628	0.052333267
ENSG00000158467	AHCYL2	0.290895456	0.204795115
ENSG00000215044	AHCYP1	0.353986667	0.219816938
ENSG00000238181	AHCYP2	0.193002045	0.673381029
ENSG00000233955	AHCYP3	0.324891631	0.783919238
ENSG00000232992	AHCYP4	0.182726522	0.668237693
ENSG00000213107	AHCYP5	-0.077471637	1
ENSG00000259465	AHCYP7	-0.233945262	0.803565461
ENSG00000242529	AHCYP8	0.123475021	1
ENSG00000126705	AHDC1	-0.080673441	1
ENSG00000135541	AHI1	0.362946772	0.04472864
ENSG00000124942	AHNAK	-1.498899738	9.89E-58
ENSG00000185567	AHNAK2	-1.877314102	1.05E-49
ENSG00000106546	AHR	-3.065584021	0.839452475
ENSG00000063438	AHRR	0.014348909	1
ENSG00000100591	AHSA1	0.339615535	0.002937054
ENSG00000173209	AHSA2	0.209598503	0.350407722
ENSG00000145192	AHSG	-1.789943949	1
ENSG00000169877	AHSP	0	1
ENSG00000111732	AICDA	0.980694287	1
ENSG00000186063	AIDA	-0.134803364	0.947998042
ENSG00000204472	AIF1	0	1
ENSG00000206428	AIF1	0	1
ENSG00000234836	AIF1	0	1
ENSG00000235588	AIF1	0	1
ENSG00000235985	AIF1	0	1
ENSG00000237727	AIF1	0	1
ENSG00000126878	AIF1L	0.372114069	0.184180459
ENSG00000156709	AIFM1	0.097262482	1
ENSG00000225509	AIFM1P1	-0.656034793	0.748493737
ENSG00000042286	AIFM2	-0.410325451	0.001297428
ENSG00000183773	AIFM3	-0.83361465	1
ENSG00000146416	AIG1	-0.669425756	0.000154484
ENSG00000249089	AIG1P1	0	1
ENSG00000112297	AIM1	-0.677384344	0.055250166
ENSG00000176092	AIM1L	0.031743734	1
ENSG00000163568	AIM2	0.144797706	1
ENSG00000164022	AIMP1	0.308415054	0.027952777
ENSG00000234187	AIMP1P1	0.134931456	1
ENSG00000227177	AIMP1P2	-1.205812003	0.922847702
ENSG00000106305	AIMP2	0.007107492	1
ENSG00000110711	AIP	-0.02623453	1
ENSG00000129221	AIPL1	-0.706534055	1
ENSG00000160224	AIRE	0	1
ENSG00000268257	AIRN	0	1
ENSG00000196581	AJAP1	1.54772368	0.18979533
ENSG00000129474	AJUBA	-0.925413505	9.17E-18
ENSG00000106992	AK1	-0.433025894	0.006282942
ENSG00000004455	AK2	0.661255725	5.36E-11
ENSG00000242272	AK2P2	0.306764813	0.416466002
ENSG00000147853	AK3	0.255131591	0.231481014
ENSG00000250115	AK3P2	0.485135686	0.982476131
ENSG00000230042	AK3P3	0.521945441	1
ENSG00000248722	AK3P4	1.968408083	1
ENSG00000228816	AK3P5	-0.961901013	1
ENSG00000162433	AK4	0.12620128	0.804786535
ENSG00000263535	AK4P1	0.249947387	0.504135111
ENSG00000249410	AK4P2	1.968899115	1
ENSG00000233381	AK4P3	0.268592205	0.393287918
ENSG00000223621	AK4P4	-0.596256987	1
ENSG00000217377	AK4P5	0	1
ENSG00000235606	AK4P6	0.374790484	0.860598134
ENSG00000154027	AK5	-0.446959785	0.094904765
ENSG00000140057	AK7	0.411689864	0.688581822
ENSG00000165695	AK8	0.146892657	1
ENSG00000121057	AKAP1	0.554101672	4.57E-07
ENSG00000108599	AKAP10	0.179191948	0.629209849
ENSG00000023516	AKAP11	0.070157266	1
ENSG00000226176	AKAP11-IT1	1.968064759	1
ENSG00000131016	AKAP12	0.012015272	1
ENSG00000170776	AKAP13	0.252858045	0.120736189
ENSG00000186471	AKAP14	0.980934396	0.531554429
ENSG00000214992	AKAP16BP	0.981735162	1
ENSG00000197976	AKAP17A	0.410922994	0.03738647
ENSG00000241978	AKAP2	0.059178672	1
ENSG00000111254	AKAP3	-0.550448484	0.117844917
ENSG00000147081	AKAP4	0	1
ENSG00000179841	AKAP5	-1.354078209	0.032674828
ENSG00000151320	AKAP6	-0.005341206	1
ENSG00000118507	AKAP7	-0.034502612	1
ENSG00000105127	AKAP8	0.520159334	3.25E-05
ENSG00000011243	AKAP8L	0.328162195	0.025401962
ENSG00000127914	AKAP9	0.272523231	0.179136291
ENSG00000155085	AKD1	-0.774537535	0.103031074
ENSG00000166452	AKIP1	-0.682438552	0.012591155
ENSG00000174574	AKIRIN1	0.203051977	0.24217706
ENSG00000135334	AKIRIN2	0.311072355	0.074642013
ENSG00000224345	AKIRIN2-AS1	0.350705518	0.327840726
ENSG00000106948	AKNA	-0.110453633	1
ENSG00000162641	AKNAD1	-0.663382132	4.78E-09
ENSG00000117448	AKR1A1	0.04506854	1
ENSG00000085662	AKR1B1	-0.116469967	0.818588139
ENSG00000198074	AKR1B10	0.468815955	1
ENSG00000213606	AKR1B10P1	1.642783292	0.922847702
ENSG00000263355	AKR1B10P2	0	1
ENSG00000227471	AKR1B15	0.523602741	1
ENSG00000229991	AKR1B1P1	0.214303683	0.840892486
ENSG00000213452	AKR1B1P2	0.137784297	1
ENSG00000237876	AKR1B1P4	-0.280462092	1
ENSG00000225212	AKR1B1P6	0.026581443	1
ENSG00000266899	AKR1B1P7	-0.018409277	1
ENSG00000231371	AKR1B1P8	-0.595667537	1
ENSG00000187134	AKR1C1	-0.506994858	1
ENSG00000151632	AKR1C2	-0.872234978	0.881088702
ENSG00000196139	AKR1C3	-1.500368186	4.74E-05
ENSG00000198610	AKR1C4	0.2405139	1
ENSG00000225418	AKR1C5P	0.205838626	1
ENSG00000151631	AKR1C6P	1.968408083	1
ENSG00000215267	AKR1C7P	-0.021030201	1
ENSG00000196326	AKR1CL1	-0.379257348	1
ENSG00000122787	AKR1D1	-0.335081884	1
ENSG00000227776	AKR1D1P1	1.968899115	1
ENSG00000165568	AKR1E2	0.055898878	1
ENSG00000053371	AKR7A2	-0.765022163	6.50E-06
ENSG00000229020	AKR7A2P1	-0.146299157	1
ENSG00000162482	AKR7A3	-0.814074571	0.970311513
ENSG00000211454	AKR7L	-0.68642899	0.724737913
ENSG00000142208	AKT1	0.016653966	1
ENSG00000204673	AKT1S1	0.292448366	0.029431374
ENSG00000105221	AKT2	-0.061343214	1
ENSG00000117020	AKT3	-0.302120293	0.057743856
ENSG00000228939	AKT3-IT1	-1.789943949	1
ENSG00000166971	AKTIP	-0.205752504	0.851737154
ENSG00000148218	ALAD	-0.986283851	7.39E-09
ENSG00000023330	ALAS1	0.47652652	4.10E-05
ENSG00000158578	ALAS2	-0.962513594	1
ENSG00000163631	ALB	0.981675023	1
ENSG00000170017	ALCAM	-0.78171631	7.86E-15
ENSG00000161618	ALDH16A1	-0.83892605	2.32E-08
ENSG00000059573	ALDH18A1	0.689587461	2.84E-11
ENSG00000165092	ALDH1A1	0.491642539	1
ENSG00000128918	ALDH1A2	-0.628726146	0.007336403
ENSG00000184254	ALDH1A3	-0.545597963	0.551345777
ENSG00000137124	ALDH1B1	-0.062263475	1
ENSG00000144908	ALDH1L1	-1.117050755	2.13E-11
ENSG00000250218	ALDH1L1-AS1	-1.242907535	0.006043069
ENSG00000246022	ALDH1L1-AS2	0.080938043	1
ENSG00000136010	ALDH1L2	-0.086125389	1
ENSG00000111275	ALDH2	-0.503463606	0.000133128
ENSG00000108602	ALDH3A1	-0.365862101	1
ENSG00000072210	ALDH3A2	0.102919248	1
ENSG00000006534	ALDH3B1	-1.842389188	6.06E-40
ENSG00000132746	ALDH3B2	-1.712877714	0.013220061
ENSG00000159423	ALDH4A1	-0.734746638	0.000168836
ENSG00000112294	ALDH5A1	-0.356980717	0.352800242
ENSG00000119711	ALDH6A1	-1.000962545	3.13E-06
ENSG00000164904	ALDH7A1	-0.432617675	0.000697776
ENSG00000251400	ALDH7A1P1	-0.551762684	5.26E-05
ENSG00000232292	ALDH7A1P2	0	1
ENSG00000243853	ALDH7A1P3	-1.789943949	1
ENSG00000234489	ALDH7A1P4	0	1
ENSG00000118514	ALDH8A1	-0.001235423	1
ENSG00000143149	ALDH9A1	-0.317706642	0.028453117
ENSG00000149925	ALDOA	-0.213906281	0.107780781
ENSG00000242849	ALDOAP1	-0.141836182	0.845518412
ENSG00000214297	ALDOAP2	-0.403105627	0.001936987
ENSG00000136872	ALDOB	1.968899115	1
ENSG00000109107	ALDOC	-1.03865752	1.55E-12
ENSG00000033011	ALG1	0.302951268	0.063279852
ENSG00000139133	ALG10	-0.668712192	0.001251786
ENSG00000175548	ALG10B	-0.288809624	0.530426505
ENSG00000253710	ALG11	0.139316854	1
ENSG00000182858	ALG12	-0.089269334	1
ENSG00000101901	ALG13	0.167907794	1
ENSG00000229487	ALG13-AS1	-0.016974649	1
ENSG00000172339	ALG14	0.140896187	1
ENSG00000189366	ALG1L	-0.539519877	0.109970037
ENSG00000254016	ALG1L10P	-0.858473167	0.532376554
ENSG00000249889	ALG1L11P	-0.026564933	1
ENSG00000250794	ALG1L12P	0.187129798	1
ENSG00000253981	ALG1L13P	-0.031722871	1
ENSG00000250268	ALG1L14P	-0.011474316	1
ENSG00000242017	ALG1L15P	0.597038126	0.088005036
ENSG00000251287	ALG1L2	-0.056827519	1
ENSG00000251087	ALG1L3P	-0.487406877	0.716774588
ENSG00000226943	ALG1L5P	-0.250405297	1
ENSG00000238278	ALG1L6P	-0.7866385	0.003247727
ENSG00000251271	ALG1L7P	-0.156499553	1
ENSG00000227620	ALG1L8P	-0.588498183	0.271026352
ENSG00000254978	ALG1L9P	-0.3128785	0.661829487
ENSG00000119523	ALG2	0.233498574	0.223506927
ENSG00000214160	ALG3	0.414998168	0.000519949
ENSG00000120697	ALG5	-0.002807481	1
ENSG00000088035	ALG6	-0.523285644	0.046099904
ENSG00000159063	ALG8	0.012879415	1
ENSG00000086848	ALG9	-0.081907491	1
ENSG00000254450	ALG9-IT1	0.338962154	1
ENSG00000171094	ALK	-0.066163202	1
ENSG00000100601	ALKBH1	0.707836541	3.42E-06
ENSG00000189046	ALKBH2	0.336051734	0.079236322
ENSG00000166199	ALKBH3	0.083309132	1
ENSG00000160993	ALKBH4	0.374545844	0.088663313
ENSG00000091542	ALKBH5	0.317547173	0.013465334
ENSG00000239382	ALKBH6	-0.408426402	0.175370725
ENSG00000125652	ALKBH7	-1.443019268	6.07E-11
ENSG00000137760	ALKBH8	0.618485955	0.000173736
ENSG00000151360	ALLC	-0.382561763	0.467695643
ENSG00000116127	ALMS1	0.195924584	0.299746769
ENSG00000230002	ALMS1-IT1	0.69936173	0.063544446
ENSG00000163016	ALMS1P	0.094538443	1
ENSG00000108839	ALOX12	-0.32293347	0.418287426
ENSG00000179477	ALOX12B	0.509734287	0.120006403
ENSG00000264958	ALOX12P1	-2.565116257	1
ENSG00000262943	ALOX12P2	-0.237357427	0.87873148
ENSG00000161905	ALOX15	-0.016911453	1
ENSG00000179593	ALOX15B	-0.596118694	1
ENSG00000188101	ALOX15P2	2.771679111	1
ENSG00000012779	ALOX5	-0.135401985	0.968122734
ENSG00000132965	ALOX5AP	2.348679873	0.146127097
ENSG00000179148	ALOXE3	1.51373215	1.33E-19
ENSG00000163295	ALPI	1.968408083	1
ENSG00000073331	ALPK1	-0.755023169	6.10E-07
ENSG00000198796	ALPK2	-1.335784514	5.06E-16
ENSG00000136383	ALPK3	-0.943896558	0.049908052
ENSG00000162551	ALPL	-0.180374213	1
ENSG00000163283	ALPP	-2.218235566	0.530426505
ENSG00000163286	ALPPL2	0	1
ENSG00000003393	ALS2	-0.071182643	1
ENSG00000178038	ALS2CL	0.154913354	0.937492299
ENSG00000155754	ALS2CR11	0.409808668	1
ENSG00000155749	ALS2CR12	0.114805648	1
ENSG00000138380	ALS2CR8	0.426639575	1
ENSG00000180318	ALX1	-1.789943949	1
ENSG00000156150	ALX3	0.209546037	0.79325471
ENSG00000052850	ALX4	-1.886650768	0.05214806
ENSG00000183684	ALYREF	0.137037813	0.59074704
ENSG00000242110	AMACR	-0.989468914	0.000120422
ENSG00000178522	AMBN	2.771679111	1
ENSG00000106927	AMBP	2.770503696	1
ENSG00000110497	AMBRA1	0.183130602	0.26161233
ENSG00000123505	AMD1	0.276867997	0.046766978
ENSG00000228339	AMD1P1	0.071448848	1
ENSG00000139344	AMDHD1	0.172285692	1
ENSG00000162066	AMDHD2	0.114912724	0.90208659
ENSG00000237801	AMDP1	0.697643252	0.371067938
ENSG00000125363	AMELX	0	1
ENSG00000099721	AMELY	0	1
ENSG00000184675	AMER1	0.396592461	0.002637377
ENSG00000165566	AMER2	0	1
ENSG00000178171	AMER3	0	1
ENSG00000159461	AMFR	0.156841281	0.474158914
ENSG00000104899	AMH	-0.170922737	1
ENSG00000135409	AMHR2	0.17812081	1
ENSG00000160593	AMICA1	0.293718802	1
ENSG00000181754	AMIGO1	0.294518751	0.130237921
ENSG00000139211	AMIGO2	-0.855024065	6.48E-16
ENSG00000176020	AMIGO3	-0.199257866	0.2740138
ENSG00000101935	AMMECR1	-0.169666987	0.69332393
ENSG00000224142	AMMECR1-IT1	-3.731662495	0.530426505
ENSG00000144233	AMMECR1L	0.468372202	0.000121551
ENSG00000233273	AMMECR1LP1	0.048803216	1
ENSG00000166126	AMN	-0.178024072	0.860885255
ENSG00000151743	AMN1	-0.465660907	0.100427395
ENSG00000126016	AMOT	-0.843216996	3.33E-05
ENSG00000166025	AMOTL1	0.005970723	1
ENSG00000114019	AMOTL2	-0.072530116	1
ENSG00000116748	AMPD1	-0.071261577	1
ENSG00000116337	AMPD2	0.32579248	0.004045552
ENSG00000133805	AMPD3	0.723563966	0.005206624
ENSG00000078053	AMPH	-1.998099788	2.39E-14
ENSG00000145020	AMT	-1.662057548	1.12E-06
ENSG00000187689	AMTN	-0.409554608	1
ENSG00000237763	AMY1A	0.023751018	1
ENSG00000174876	AMY1B	1.394474289	1
ENSG00000187733	AMY1C	0	1
ENSG00000243480	AMY2A	-0.121696099	1
ENSG00000240038	AMY2B	-0.41843225	0.001275622
ENSG00000227408	AMYP1	1.968899115	1
ENSG00000174945	AMZ1	-0.114759814	0.802299145
ENSG00000196704	AMZ2	-0.209318519	0.367283614
ENSG00000214174	AMZ2P1	-0.475853436	0.057361824
ENSG00000219249	AMZ2P2	0.678079258	1
ENSG00000153107	ANAPC1	0.238399833	0.117179804
ENSG00000164162	ANAPC10	0.493648795	0.044591279
ENSG00000213735	ANAPC10P1	0.698875793	0.788373046
ENSG00000141552	ANAPC11	-0.328009586	0.016477814
ENSG00000129055	ANAPC13	0.272822719	0.133746639
ENSG00000110200	ANAPC15	-0.285714503	0.157443503
ENSG00000166295	ANAPC16	-0.548371333	5.14E-05
ENSG00000233673	ANAPC1P1	0.080587547	1
ENSG00000176248	ANAPC2	-0.048035358	1
ENSG00000053900	ANAPC4	-0.348821319	0.229735576
ENSG00000089053	ANAPC5	0.261916869	0.059329355
ENSG00000196510	ANAPC7	-0.05046877	1
ENSG00000214274	ANG	-1.387397493	5.91E-05
ENSG00000013523	ANGEL1	0.987755145	8.79E-14
ENSG00000174606	ANGEL2	0.226617063	0.811508743
ENSG00000154188	ANGPT1	0.533358447	0.871228395
ENSG00000091879	ANGPT2	0.980909764	0.433946667
ENSG00000101280	ANGPT4	0.389119836	0.37811862
ENSG00000116194	ANGPTL1	0.17812081	1
ENSG00000136859	ANGPTL2	-0.063077178	1
ENSG00000132855	ANGPTL3	1.968408083	1
ENSG00000167772	ANGPTL4	0.799157674	0.87943317
ENSG00000187151	ANGPTL5	-1.210953122	0.385852701
ENSG00000130812	ANGPTL6	-1.003630322	0.000760493
ENSG00000171819	ANGPTL7	0	1
ENSG00000227059	ANHX	0	1
ENSG00000029534	ANK1	-0.416767402	0.098205588
ENSG00000145362	ANK2	-0.022595803	1
ENSG00000151150	ANK3	-0.345041596	0.225723381
ENSG00000151687	ANKAR	-0.474946865	0.049846649
ENSG00000166839	ANKDD1A	0.380278713	0.030759797
ENSG00000189045	ANKDD1B	-0.017284543	1
ENSG00000132623	ANKEF1	0.684376175	0.022119525
ENSG00000153930	ANKFN1	0.442195189	0.766038248
ENSG00000185722	ANKFY1	-0.030000061	1
ENSG00000154122	ANKH	0.750745128	2.13E-13
ENSG00000131503	ANKHD1	0.449406043	0.000138014
ENSG00000254996	ANKHD1-EIF4EBP3	0.447595716	0.000150164
ENSG00000001629	ANKIB1	-0.155786527	0.541708193
ENSG00000170209	ANKK1	-2.56466507	1
ENSG00000160117	ANKLE1	-0.087817829	1
ENSG00000176915	ANKLE2	0.098565536	0.950249292
ENSG00000144504	ANKMY1	0.750677498	7.84E-06
ENSG00000106524	ANKMY2	0.301630466	0.2428525
ENSG00000164331	ANKRA2	0.058893892	1
ENSG00000148677	ANKRD1	-0.176270836	0.342413259
ENSG00000088448	ANKRD10	-0.235415024	0.28922182
ENSG00000229152	ANKRD10-IT1	-0.295986552	0.704505437
ENSG00000167522	ANKRD11	0.382072295	0.00060194
ENSG00000101745	ANKRD12	-0.026853107	1
ENSG00000076513	ANKRD13A	0.007328814	1
ENSG00000198720	ANKRD13B	1.366735763	5.34E-29
ENSG00000118454	ANKRD13C	0.293273612	0.133927206
ENSG00000172932	ANKRD13D	0.037470865	1
ENSG00000134461	ANKRD16	0.854746151	7.83E-05
ENSG00000132466	ANKRD17	0.41376756	0.000116343
ENSG00000180071	ANKRD18A	0.45730543	0.026163561
ENSG00000230453	ANKRD18B	0.354067919	1
ENSG00000159712	ANKRD18CP	-0.298167561	0.409880121
ENSG00000226435	ANKRD18DP	-1.096783106	1
ENSG00000217165	ANKRD18EP	-0.463200977	0.640918601
ENSG00000187984	ANKRD19P	0.151987522	0.54431919
ENSG00000165887	ANKRD2	-0.126196577	1
ENSG00000196774	ANKRD20A1	-0.971430599	0.670047747
ENSG00000226695	ANKRD20A10P	0	1
ENSG00000215559	ANKRD20A11P	0.389641316	0.59527155
ENSG00000242676	ANKRD20A12P	-0.656434023	0.027850792
ENSG00000232745	ANKRD20A14P	-0.289807458	0.970311513
ENSG00000251056	ANKRD20A17P	1.494030267	1
ENSG00000249493	ANKRD20A18P	-0.295041983	1
ENSG00000196593	ANKRD20A19P	0.718576536	1
ENSG00000183148	ANKRD20A2	-1.114452515	0.422936739
ENSG00000132498	ANKRD20A3	0.424938165	0.983779104
ENSG00000172014	ANKRD20A4	1.014825571	0.566605329
ENSG00000186481	ANKRD20A5P	0.012417246	1
ENSG00000236816	ANKRD20A7P	0.593445593	0.951966136
ENSG00000229089	ANKRD20A8P	-0.017242143	1
ENSG00000206192	ANKRD20A9P	-0.270626683	1
ENSG00000152766	ANKRD22	2.037711568	0.488772154
ENSG00000163126	ANKRD23	0.41354054	0.000594643
ENSG00000089847	ANKRD24	-0.501897763	0.333043958
ENSG00000107890	ANKRD26	0.014984164	1
ENSG00000261239	ANKRD26P1	0.269891589	0.629408695
ENSG00000235550	ANKRD26P2	2.770503696	1
ENSG00000237636	ANKRD26P3	0.279362302	0.171110823
ENSG00000229427	ANKRD26P4	-1.790042574	1
ENSG00000105186	ANKRD27	0.601281253	3.29E-07
ENSG00000206560	ANKRD28	-0.412701868	0.000829572
ENSG00000154065	ANKRD29	0.443445252	0.332924807
ENSG00000148513	ANKRD30A	0.491610071	1
ENSG00000180777	ANKRD30B	0.994539971	0.144850227
ENSG00000163046	ANKRD30BL	-0.719398971	2.26E-13
ENSG00000175302	ANKRD30BP1	0.019735219	1
ENSG00000224309	ANKRD30BP2	1.48445161	6.56E-06
ENSG00000230501	ANKRD30BP3	1.165521035	1
ENSG00000145700	ANKRD31	0.45784306	0.630581358
ENSG00000133302	ANKRD32	-0.123584781	1
ENSG00000167612	ANKRD33	0	1
ENSG00000164236	ANKRD33B	0.395229828	0.015159756
ENSG00000250106	ANKRD33B-AS1	-1.789943949	1
ENSG00000181039	ANKRD34A	0.518942704	0.004672312
ENSG00000189127	ANKRD34B	0.384526886	1
ENSG00000235711	ANKRD34C	-1.790042574	1
ENSG00000198483	ANKRD35	0.307699995	1
ENSG00000135976	ANKRD36	-0.104433222	1
ENSG00000196912	ANKRD36B	-0.37823277	0.289783374
ENSG00000214262	ANKRD36BP1	0.177048983	1
ENSG00000230006	ANKRD36BP2	0.240301165	1
ENSG00000174501	ANKRD36C	0.03545261	1
ENSG00000188399	ANKRD36P1	-1.790042574	1
ENSG00000186352	ANKRD37	0.394032529	0.297851376
ENSG00000213337	ANKRD39	0.195266086	0.63166555
ENSG00000154945	ANKRD40	0.275442742	0.04845258
ENSG00000137494	ANKRD42	1.017223663	3.25E-11
ENSG00000065413	ANKRD44	-0.103723069	1
ENSG00000236977	ANKRD44-IT1	-0.346891197	0.9609279
ENSG00000183831	ANKRD45	-1.147835458	0.020190858
ENSG00000186106	ANKRD46	-0.039489894	1
ENSG00000168876	ANKRD49	0.166443423	1
ENSG00000151458	ANKRD50	-0.064137719	1
ENSG00000139645	ANKRD52	-0.168127097	0.330979116
ENSG00000144031	ANKRD53	-0.438775184	1
ENSG00000100124	ANKRD54	-0.098023705	1
ENSG00000236442	ANKRD54P1	1.396451275	1
ENSG00000164512	ANKRD55	-0.138667571	1
ENSG00000135299	ANKRD6	0.424022184	0.209508212
ENSG00000124227	ANKRD60	0	1
ENSG00000157999	ANKRD61	0.03410505	1
ENSG00000181626	ANKRD62	0.353823992	1
ENSG00000259271	ANKRD62P1	1.493578303	1
ENSG00000189295	ANKRD62P1-PARP4P3	0.981464702	1
ENSG00000230778	ANKRD63	-3.065780426	0.839452475
ENSG00000235098	ANKRD65	-1.790042574	1
ENSG00000230062	ANKRD66	3.660762331	0.530426505
ENSG00000106013	ANKRD7	-0.32293853	1
ENSG00000156381	ANKRD9	-0.966341362	0.000376632
ENSG00000064999	ANKS1A	0.278158521	0.059767414
ENSG00000185046	ANKS1B	-0.272379758	0.38980439
ENSG00000168096	ANKS3	0.8560457	9.03E-11
ENSG00000175311	ANKS4B	-0.665863891	1
ENSG00000165138	ANKS6	0.309636225	0.044634115
ENSG00000206199	ANKUB1	-0.343208302	0.004587331
ENSG00000163516	ANKZF1	-0.239748983	0.330558068
ENSG00000011426	ANLN	-0.698134943	5.86E-12
ENSG00000131620	ANO1	-1.033051046	0.06469754
ENSG00000254902	ANO1-AS1	-1.763309948	0.783919238
ENSG00000254417	ANO1-AS2	-0.045112474	1
ENSG00000160746	ANO10	-0.514072806	0.000273398
ENSG00000047617	ANO2	-0.67574183	2.74E-06
ENSG00000134343	ANO3	-0.83917545	5.88E-07
ENSG00000151572	ANO4	-0.021187556	1
ENSG00000171714	ANO5	0.140200673	1
ENSG00000177119	ANO6	-0.175644855	0.488772154
ENSG00000146205	ANO7	0.96562177	0.000588382
ENSG00000074855	ANO8	-0.577715215	0.001751175
ENSG00000185101	ANO9	-0.27540345	1
ENSG00000140350	ANP32A	0.031817299	1
ENSG00000259516	ANP32AP1	-0.006708302	1
ENSG00000136938	ANP32B	-0.217117154	0.140549516
ENSG00000259790	ANP32BP1	-0.109198197	1
ENSG00000231801	ANP32BP2	0	1
ENSG00000259461	ANP32BP3	-0.758123745	0.029431374
ENSG00000248546	ANP32C	0.126960962	1
ENSG00000139223	ANP32D	0.031047356	1
ENSG00000143401	ANP32E	-0.352665166	0.004280131
ENSG00000166825	ANPEP	1.19863802	0.385852701
ENSG00000169604	ANTXR1	-0.25751178	0.066946337
ENSG00000163297	ANTXR2	0.050813226	1
ENSG00000198250	ANTXRL	0.981675023	1
ENSG00000243536	ANTXRLP1	1.968408083	1
ENSG00000135046	ANXA1	-0.908666766	1.25E-19
ENSG00000109511	ANXA10	-0.894713636	0.670047747
ENSG00000122359	ANXA11	-0.326335529	0.008543475
ENSG00000104537	ANXA13	1.475794225	0.521224271
ENSG00000182718	ANXA2	-1.001544712	1.84E-26
ENSG00000213406	ANXA2P1	-1.015391283	2.16E-20
ENSG00000231991	ANXA2P2	-1.047721208	1.20E-28
ENSG00000216740	ANXA2P3	-1.010799938	2.07E-18
ENSG00000177721	ANXA2R	-0.111813383	1
ENSG00000138772	ANXA3	-0.651777468	0.004049366
ENSG00000196975	ANXA4	-0.415045772	0.01053133
ENSG00000164111	ANXA5	-0.326525797	0.004627107
ENSG00000197043	ANXA6	-0.818352602	2.16E-15
ENSG00000138279	ANXA7	-0.283065576	0.033247158
ENSG00000165390	ANXA8	-1.791460263	0.001755762
ENSG00000150165	ANXA8L1	-1.787835339	0.000770021
ENSG00000186807	ANXA8L2	-2.014059643	1.83E-06
ENSG00000143412	ANXA9	-1.291053777	0.022797133
ENSG00000136250	AOAH	0.357933976	0.909479249
ENSG00000230539	AOAH-IT1	0	1
ENSG00000131480	AOC2	0.594203239	0.000396321
ENSG00000131471	AOC3	0.666054326	0.000448142
ENSG00000138356	AOX1	-0.790242514	3.00E-11
ENSG00000243478	AOX2P	1.068413162	0.594723711
ENSG00000138660	AP1AR	0.362634251	0.024785443
ENSG00000100280	AP1B1	0.260537535	0.047739042
ENSG00000234479	AP1B1P1	-0.524994235	1
ENSG00000232707	AP1B1P2	0.719358653	1
ENSG00000166747	AP1G1	0.012042106	1
ENSG00000213983	AP1G2	-0.712796971	2.45E-08
ENSG00000072958	AP1M1	-0.103442392	1
ENSG00000129354	AP1M2	-0.593425231	2.62E-06
ENSG00000106367	AP1S1	-0.194091794	0.292107305
ENSG00000182287	AP1S2	0.127667067	1
ENSG00000152056	AP1S3	0.87630031	0.000118322
ENSG00000196961	AP2A1	-1.117074811	5.51E-25
ENSG00000183020	AP2A2	0.273420528	0.062003762
ENSG00000006125	AP2B1	-0.111963952	0.809613577
ENSG00000161203	AP2M1	-0.465329591	7.37E-06
ENSG00000042753	AP2S1	0.064839479	1
ENSG00000132842	AP3B1	-0.52837419	3.41E-05
ENSG00000103723	AP3B2	0.269132301	0.288132957
ENSG00000065000	AP3D1	0.004582604	1
ENSG00000185009	AP3M1	0.039032298	1
ENSG00000070718	AP3M2	0.26136523	0.098979968
ENSG00000177879	AP3S1	0.212167961	0.282849421
ENSG00000157823	AP3S2	-0.05671275	1
ENSG00000134262	AP4B1	0.15716682	0.685546281
ENSG00000226167	AP4B1-AS1	0.183202769	0.646880265
ENSG00000081014	AP4E1	0.28192982	0.136204749
ENSG00000221838	AP4M1	-0.44189608	0.00068416
ENSG00000100478	AP4S1	-0.13877545	1
ENSG00000254470	AP5B1	-0.008615268	1
ENSG00000053770	AP5M1	0.079296657	1
ENSG00000125843	AP5S1	-0.844244929	0.0004721
ENSG00000242802	AP5Z1	0.52588796	4.23E-06
ENSG00000120868	APAF1	-1.09745776	1.75E-08
ENSG00000107282	APBA1	-1.017204482	0.094321069
ENSG00000034053	APBA2	0.141770839	0.818588139
ENSG00000011132	APBA3	-0.040978445	1
ENSG00000166313	APBB1	-0.072120891	1
ENSG00000077420	APBB1IP	0.091317187	1
ENSG00000163697	APBB2	-0.632955742	4.77E-07
ENSG00000113108	APBB3	-0.073846052	1
ENSG00000134982	APC	0.098877417	1
ENSG00000115266	APC2	-0.350894638	0.01780433
ENSG00000154856	APCDD1	-1.596935905	0.688581822
ENSG00000198768	APCDD1L	-1.186656781	0.060499264
ENSG00000231290	APCDD1L-AS1	-0.548213086	0.000461626
ENSG00000132703	APCS	0	1
ENSG00000164062	APEH	-0.309319956	0.013352256
ENSG00000100823	APEX1	-0.052450312	1
ENSG00000169188	APEX2	-0.203600147	0.286461387
ENSG00000117362	APH1A	-0.3133262	0.016212487
ENSG00000138613	APH1B	-1.670198567	2.07E-18
ENSG00000166181	API5	0.266480057	0.050458507
ENSG00000234558	API5P1	0.091292625	1
ENSG00000213962	API5P2	0.19479163	1
ENSG00000149089	APIP	-0.301294784	0.404601194
ENSG00000175279	APITD1	-0.215281568	0.551345777
ENSG00000251503	APITD1-CORT	-0.127703128	1
ENSG00000169621	APLF	-0.111278766	1
ENSG00000171388	APLN	-3.065584021	0.839452475
ENSG00000134817	APLNR	0	1
ENSG00000105290	APLP1	-0.946659846	1.30E-08
ENSG00000084234	APLP2	-0.46365012	1.13E-05
ENSG00000101474	APMAP	-0.209719354	0.162927611
ENSG00000118137	APOA1	1.353833386	0.803565461
ENSG00000163382	APOA1BP	-0.289232565	0.112255065
ENSG00000158874	APOA2	0.178022184	1
ENSG00000110244	APOA4	0	1
ENSG00000110243	APOA5	0	1
ENSG00000084674	APOB	0.217500109	1
ENSG00000111701	APOBEC1	1.854837032	0.488772154
ENSG00000124701	APOBEC2	0.382291908	1
ENSG00000128383	APOBEC3A	-1.23605324	1.50E-09
ENSG00000248822	APOBEC3AP1	0	1
ENSG00000179750	APOBEC3B	-1.21698598	2.38E-25
ENSG00000249310	APOBEC3B-AS1	-1.09573298	9.08E-11
ENSG00000244509	APOBEC3C	-0.93915183	8.69E-09
ENSG00000243811	APOBEC3D	-1.126377421	1.21E-19
ENSG00000128394	APOBEC3F	-1.41000185	1.94E-16
ENSG00000239713	APOBEC3G	-1.291274002	5.43E-16
ENSG00000100298	APOBEC3H	-0.01743676	1
ENSG00000173627	APOBEC4	0	1
ENSG00000184730	APOBR	-1.764445606	0.783919238
ENSG00000130208	APOC1	0.071761265	1
ENSG00000214855	APOC1P1	0.7203379	1
ENSG00000234906	APOC2	0	1
ENSG00000110245	APOC3	-1.790042574	1
ENSG00000267467	APOC4	-0.596403481	1
ENSG00000189058	APOD	1.096134645	1
ENSG00000130203	APOE	0.244001451	1
ENSG00000175336	APOF	0	1
ENSG00000091583	APOH	0.10474715	1
ENSG00000100342	APOL1	-1.245799882	2.01E-24
ENSG00000128335	APOL2	-0.468374343	0.000724168
ENSG00000128284	APOL3	-1.764536802	3.02E-12
ENSG00000100336	APOL4	-1.685255493	0.150710641
ENSG00000128313	APOL5	-1.469290916	1
ENSG00000221963	APOL6	-2.019475114	2.80E-22
ENSG00000178878	APOLD1	-0.395110703	0.532376554
ENSG00000204444	APOM	0.298100079	0.368113771
ENSG00000206409	APOM	0	1
ENSG00000224290	APOM	0	1
ENSG00000226215	APOM	0	1
ENSG00000227567	APOM	0	1
ENSG00000231974	APOM	0	1
ENSG00000235754	APOM	0	1
ENSG00000184831	APOO	-0.238298287	0.117692293
ENSG00000155008	APOOL	0.110213018	1
ENSG00000256053	APOPT1	0.238192629	0.783919238
ENSG00000142192	APP	-0.122965865	0.658875826
ENSG00000062725	APPBP2	-0.309131711	0.033102787
ENSG00000157500	APPL1	-0.186759775	0.420339945
ENSG00000136044	APPL2	-0.133166995	1
ENSG00000198931	APRT	-0.078687033	1
ENSG00000137074	APTX	0.197444527	0.349636506
ENSG00000240583	AQP1	-0.877648246	2.01E-08
ENSG00000143595	AQP10	0.719848194	1
ENSG00000178301	AQP11	-0.484770986	0.455725143
ENSG00000184945	AQP12A	0.981184572	1
ENSG00000185176	AQP12B	0	1
ENSG00000167580	AQP2	1.968899115	1
ENSG00000165272	AQP3	0.965836906	0.056338121
ENSG00000171885	AQP4	1.968408083	1
ENSG00000260372	AQP4-AS1	-0.067028561	1
ENSG00000161798	AQP5	-1.789943949	1
ENSG00000086159	AQP6	0.585084209	0.922847702
ENSG00000165269	AQP7	-0.225040008	1
ENSG00000186466	AQP7P1	0.790397992	0.954120814
ENSG00000181997	AQP7P2	-0.225568995	1
ENSG00000156750	AQP7P3	0.441461492	1
ENSG00000176115	AQP7P4	-1.205903879	0.922847702
ENSG00000103375	AQP8	-0.666959174	1
ENSG00000103569	AQP9	0.223797196	1
ENSG00000021776	AQR	0.004383018	1
ENSG00000169083	AR	-0.49689507	0.019492742
ENSG00000078061	ARAF	-0.324465507	0.017182584
ENSG00000186635	ARAP1	-0.514490145	3.26E-06
ENSG00000256007	ARAP1-AS1	-0.264670478	0.221165459
ENSG00000245148	ARAP1-AS2	-0.504783656	0.109718804
ENSG00000047365	ARAP2	0.528803702	0.007405643
ENSG00000120318	ARAP3	-0.030159101	1
ENSG00000198576	ARC	2.050513467	6.52E-98
ENSG00000095139	ARCN1	0.140208321	0.620645812
ENSG00000109321	AREG	1.381132727	0.000703325
ENSG00000205595	AREGB	1.73265223	4.81E-06
ENSG00000143761	ARF1	0.300177224	0.011866509
ENSG00000219807	ARF1P1	-0.224268737	1
ENSG00000213137	ARF1P2	0.127029891	1
ENSG00000253885	ARF1P3	0.227918846	1
ENSG00000134287	ARF3	-0.124177836	0.666445436
ENSG00000168374	ARF4	-0.058710864	1
ENSG00000236527	ARF4P2	0.236502403	1
ENSG00000214051	ARF4P3	0.548814345	0.727528922
ENSG00000231222	ARF4P4	-0.871299999	1
ENSG00000004059	ARF5	-0.427650786	0.001776933
ENSG00000165527	ARF6	-0.028082605	1
ENSG00000101199	ARFGAP1	0.583990267	4.97E-09
ENSG00000149182	ARFGAP2	-0.084458665	1
ENSG00000242247	ARFGAP3	-0.356126384	0.033953941
ENSG00000066777	ARFGEF1	0.063997435	1
ENSG00000124198	ARFGEF2	0.074948946	1
ENSG00000164144	ARFIP1	-0.049612978	1
ENSG00000132254	ARFIP2	0.450660977	0.000235255
ENSG00000101246	ARFRP1	0.021936534	1
ENSG00000118520	ARG1	0.225125303	1
ENSG00000081181	ARG2	0.070476322	1
ENSG00000186103	ARGFX	0.771270822	1
ENSG00000240058	ARGFXP1	0	1
ENSG00000134884	ARGLU1	0.106269648	1
ENSG00000175220	ARHGAP1	-0.221999825	0.204399332
ENSG00000071205	ARHGAP10	0.335002392	0.139283095
ENSG00000198826	ARHGAP11A	-0.33482208	0.016086603
ENSG00000187951	ARHGAP11B	-0.200128095	0.487669897
ENSG00000165322	ARHGAP12	-0.012157932	1
ENSG00000075884	ARHGAP15	-0.059833654	1
ENSG00000140750	ARHGAP17	0.153488776	0.663977781
ENSG00000146376	ARHGAP18	0.305594443	0.702156251
ENSG00000213390	ARHGAP19	-0.021032283	1
ENSG00000137727	ARHGAP20	1.335215263	0.000725081
ENSG00000107863	ARHGAP21	-0.336641233	0.014226219
ENSG00000128805	ARHGAP22	1.190061488	2.13E-20
ENSG00000248682	ARHGAP22-IT1	0.981392441	1
ENSG00000225485	ARHGAP23	-0.47858515	0.000319728
ENSG00000260781	ARHGAP23P1	-0.538129597	0.276384056
ENSG00000138639	ARHGAP24	-0.492651824	0.349636506
ENSG00000163219	ARHGAP25	0.391874897	0.882610415
ENSG00000145819	ARHGAP26	0.279684948	0.412145518
ENSG00000226272	ARHGAP26-AS1	0	1
ENSG00000230789	ARHGAP26-IT1	-1.789943949	1
ENSG00000159314	ARHGAP27	-1.093157607	9.69E-05
ENSG00000088756	ARHGAP28	-0.603636079	0.200364553
ENSG00000137962	ARHGAP29	-1.845151569	2.99E-60
ENSG00000186517	ARHGAP30	-1.035757493	0.157192841
ENSG00000031081	ARHGAP31	-0.92582521	7.39E-12
ENSG00000241155	ARHGAP31-AS1	0.309220907	0.972435599
ENSG00000134909	ARHGAP32	0.183772659	0.555611939
ENSG00000004777	ARHGAP33	-1.472331875	3.15E-14
ENSG00000160007	ARHGAP35	-0.957508887	1.16E-15
ENSG00000147256	ARHGAP36	0.981293816	1
ENSG00000147799	ARHGAP39	-0.068666489	1
ENSG00000089820	ARHGAP4	0.363253586	0.00227204
ENSG00000124143	ARHGAP40	-0.503788284	0.139833432
ENSG00000165895	ARHGAP42	-0.211856309	0.521224271
ENSG00000227817	ARHGAP42P1	0.751344989	0.922847702
ENSG00000231147	ARHGAP42P2	0.36816409	1
ENSG00000235759	ARHGAP42P3	-0.447197846	1
ENSG00000258080	ARHGAP42P4	2.170375859	0.783919238
ENSG00000258233	ARHGAP42P5	-0.667057235	1
ENSG00000006740	ARHGAP44	-0.143439637	1
ENSG00000100852	ARHGAP5	-0.346656951	0.02632445
ENSG00000258655	ARHGAP5-AS1	-0.427592122	1
ENSG00000047648	ARHGAP6	0.520149793	0.005050864
ENSG00000241484	ARHGAP8	1.040530947	2.03E-20
ENSG00000123329	ARHGAP9	0.12492246	1
ENSG00000141522	ARHGDIA	0.045184393	1
ENSG00000111348	ARHGDIB	-0.35023248	0.363101092
ENSG00000242173	ARHGDIG	3.661592112	0.530426505
ENSG00000076928	ARHGEF1	-0.374849583	0.005856891
ENSG00000104728	ARHGEF10	-0.420707563	0.001394432
ENSG00000074964	ARHGEF10L	-0.960494669	5.71E-08
ENSG00000132694	ARHGEF11	-0.262636626	0.105001724
ENSG00000196914	ARHGEF12	-0.114592597	0.880986021
ENSG00000198844	ARHGEF15	-1.789943949	1
ENSG00000130762	ARHGEF16	-0.262758003	0.383667585
ENSG00000110237	ARHGEF17	-0.621138888	6.09E-08
ENSG00000104880	ARHGEF18	-0.096202231	1
ENSG00000142632	ARHGEF19	-0.316272372	0.058693225
ENSG00000234166	ARHGEF19-AS1	-0.578640437	0.357113909
ENSG00000116584	ARHGEF2	0.604060774	1.54E-08
ENSG00000240771	ARHGEF25	-0.073577563	1
ENSG00000114790	ARHGEF26	0.735938813	0.000133153
ENSG00000243069	ARHGEF26-AS1	0.491588704	1
ENSG00000214944	ARHGEF28	0.1086298	1
ENSG00000163947	ARHGEF3	-0.308585699	0.187251482
ENSG00000240198	ARHGEF3-AS1	0.477380796	1
ENSG00000214694	ARHGEF33	-1.167116828	8.17E-05
ENSG00000213214	ARHGEF35	-0.33941346	0.783919238
ENSG00000183111	ARHGEF37	-0.26155889	1
ENSG00000236699	ARHGEF38	0.396361554	0.034039346
ENSG00000249885	ARHGEF38-IT1	1.968408083	1
ENSG00000137135	ARHGEF39	-0.772909782	3.26E-09
ENSG00000136002	ARHGEF4	0.213669065	0.819395987
ENSG00000165801	ARHGEF40	-1.087872887	3.92E-22
ENSG00000050327	ARHGEF5	-0.790709032	0.133662903
ENSG00000129675	ARHGEF6	-0.722600568	0.234909825
ENSG00000102606	ARHGEF7	0.098940917	1
ENSG00000227352	ARHGEF7-AS1	0	1
ENSG00000235875	ARHGEF7-AS2	0	1
ENSG00000233644	ARHGEF7-IT1	-0.960970492	1
ENSG00000131089	ARHGEF9	-0.307583033	0.247892625
ENSG00000231729	ARHGEF9-IT1	0	1
ENSG00000117713	ARID1A	-0.149356182	0.526029804
ENSG00000049618	ARID1B	-0.309763898	0.017048307
ENSG00000189079	ARID2	0.005782259	1
ENSG00000116017	ARID3A	-0.157380255	0.833180069
ENSG00000179361	ARID3B	0.696681914	5.13E-05
ENSG00000205143	ARID3C	1.60981701	0.209508212
ENSG00000032219	ARID4A	0.412001738	0.100256065
ENSG00000054267	ARID4B	0.164932631	0.625967064
ENSG00000232686	ARID4B-IT1	0.980902271	1
ENSG00000196843	ARID5A	0.506096768	0.00022423
ENSG00000150347	ARID5B	-0.063725092	1
ENSG00000166233	ARIH1	0.240070918	0.206878426
ENSG00000177479	ARIH2	0.523706939	1.64E-06
ENSG00000221883	ARIH2OS	-0.14886449	1
ENSG00000266296	ARIH2P1	0.522835965	0.007060668
ENSG00000120805	ARL1	0.020761651	1
ENSG00000175414	ARL10	0.252270786	0.051652024
ENSG00000152213	ARL11	-0.596158569	1
ENSG00000174225	ARL13A	-0.563327387	1
ENSG00000169379	ARL13B	0.527574561	0.002328571
ENSG00000179674	ARL14	-0.121770979	1
ENSG00000152219	ARL14EP	0.080621089	1
ENSG00000268223	ARL14EPL	-0.172784082	0.448443569
ENSG00000185305	ARL15	-0.377095196	0.426438019
ENSG00000214087	ARL16	0.192513687	0.706735357
ENSG00000185829	ARL17A	-0.044419825	1
ENSG00000228696	ARL17B	0.191598805	0.493132884
ENSG00000213465	ARL2	-0.283522423	0.128736055
ENSG00000102931	ARL2BP	-0.363437307	0.018516898
ENSG00000265934	ARL2BPP1	0.21746118	1
ENSG00000225225	ARL2BPP10	1.395512011	1
ENSG00000258071	ARL2BPP2	1.870756363	1
ENSG00000215486	ARL2BPP3	-1.485462514	0.448297084
ENSG00000249312	ARL2BPP4	-1.382846264	0.37811862
ENSG00000254351	ARL2BPP5	0	1
ENSG00000248355	ARL2BPP6	0	1
ENSG00000230418	ARL2BPP7	0.980803646	1
ENSG00000263125	ARL2BPP8	-0.294551698	1
ENSG00000138175	ARL3	-0.695436037	0.000250386
ENSG00000122644	ARL4A	-0.013372564	1
ENSG00000188042	ARL4C	-2.367550428	9.00E-45
ENSG00000175906	ARL4D	-0.553864245	0.244640711
ENSG00000122872	ARL4P	-0.00722882	1
ENSG00000162980	ARL5A	0.335092367	0.032997557
ENSG00000227864	ARL5AP1	-1.468554591	1
ENSG00000236818	ARL5AP2	0.616857868	1
ENSG00000228431	ARL5AP3	0.17885654	1
ENSG00000224806	ARL5AP4	0.207372703	1
ENSG00000165997	ARL5B	0.132358135	1
ENSG00000152487	ARL5B-AS1	0.336207871	0.985275188
ENSG00000141748	ARL5C	-0.437207613	1
ENSG00000113966	ARL6	0.568026193	0.033262385
ENSG00000170540	ARL6IP1	-0.785800967	1.63E-12
ENSG00000255664	ARL6IP1P1	-1.098616572	1
ENSG00000225355	ARL6IP1P2	-1.000059783	2.08E-05
ENSG00000255014	ARL6IP1P3	-1.196020427	0.001882603
ENSG00000182196	ARL6IP4	-0.113790402	0.856956764
ENSG00000144746	ARL6IP5	-1.035600357	9.47E-18
ENSG00000177917	ARL6IP6	-0.505971435	0.003996315
ENSG00000143862	ARL8A	0.100977968	1
ENSG00000134108	ARL8B	0.041932668	1
ENSG00000196503	ARL9	0.947613968	0.113568021
ENSG00000104442	ARMC1	-0.093821214	1
ENSG00000170632	ARMC10	0.121771735	0.989977691
ENSG00000178660	ARMC10P1	0.086239997	1
ENSG00000157343	ARMC12	-1.15737425	0.37811862
ENSG00000118690	ARMC2	0.091396632	1
ENSG00000230290	ARMC2-AS1	0	1
ENSG00000165309	ARMC3	0.348832501	1
ENSG00000169126	ARMC4	-0.059853965	1
ENSG00000238021	ARMC4P1	-0.224926989	1
ENSG00000140691	ARMC5	0.465902511	0.001704684
ENSG00000105676	ARMC6	0.665822394	3.31E-09
ENSG00000125449	ARMC7	-0.096063568	1
ENSG00000114098	ARMC8	0.084302597	1
ENSG00000135931	ARMC9	-0.016253312	1
ENSG00000126947	ARMCX1	-0.844359998	1.70E-06
ENSG00000184867	ARMCX2	-0.915825469	3.86E-15
ENSG00000102401	ARMCX3	-0.341757542	0.031589199
ENSG00000228275	ARMCX3-AS1	-0.14560156	1
ENSG00000196440	ARMCX4	-0.420797865	0.16937866
ENSG00000125962	ARMCX5	-0.037262275	1
ENSG00000198960	ARMCX6	-0.342717034	0.079976551
ENSG00000254636	ARMS2	0	1
ENSG00000143437	ARNT	-0.490714542	0.000378465
ENSG00000172379	ARNT2	-1.17531737	2.77E-06
ENSG00000133794	ARNTL	-0.076410995	1
ENSG00000029153	ARNTL2	-0.778568629	3.10E-10
ENSG00000241685	ARPC1A	-0.323209343	0.008419005
ENSG00000130429	ARPC1B	-0.259499309	0.055646663
ENSG00000163466	ARPC2	-0.05713475	1
ENSG00000111229	ARPC3	-0.31445129	0.061426034
ENSG00000226284	ARPC3P1	-0.569346249	0.090874481
ENSG00000238137	ARPC3P2	-0.629003897	0.26232649
ENSG00000214027	ARPC3P5	0.266462943	1
ENSG00000241553	ARPC4	-0.026785817	1
ENSG00000250151	ARPC4-TTLL3	-0.018230722	1
ENSG00000162704	ARPC5	-0.76975445	4.76E-10
ENSG00000136950	ARPC5L	0.321113136	0.016696622
ENSG00000128989	ARPP19	-0.146420641	0.714163854
ENSG00000172995	ARPP21	1.529144886	0.038317677
ENSG00000230830	ARPP21-AS1	0	1
ENSG00000120500	ARR3	-0.045988028	1
ENSG00000137486	ARRB1	1.261197771	1.98E-24
ENSG00000141480	ARRB2	0.240866053	0.16825057
ENSG00000197070	ARRDC1	-0.006816124	1
ENSG00000105643	ARRDC2	0.666634472	9.42E-07
ENSG00000113369	ARRDC3	-0.85967664	0.004827948
ENSG00000140450	ARRDC4	2.277273277	2.70E-24
ENSG00000205784	ARRDC5	-0.224486087	1
ENSG00000100299	ARSA	-0.816426009	3.48E-06
ENSG00000113273	ARSB	-0.207042623	0.544021677
ENSG00000006756	ARSD	-0.257978568	1
ENSG00000229851	ARSD-AS1	-0.153820825	1
ENSG00000225117	ARSDP1	-2.565116257	1
ENSG00000157399	ARSE	0.981297597	1
ENSG00000224060	ARSEP1	1.968408083	1
ENSG00000062096	ARSF	0.852345397	0.778949515
ENSG00000232226	ARSFP1	1.968064759	1
ENSG00000141337	ARSG	0.208111909	1
ENSG00000205667	ARSH	0.224236437	1
ENSG00000183876	ARSI	-1.224254875	2.09E-15
ENSG00000180801	ARSJ	0.159976099	0.651525557
ENSG00000164291	ARSK	0.215470411	1
ENSG00000129744	ART1	-0.625710419	1
ENSG00000156219	ART3	-0.336444567	1
ENSG00000111339	ART4	0.72761168	1
ENSG00000167311	ART5	1.968064759	1
ENSG00000117407	ARTN	-1.206260324	0.922847702
ENSG00000173409	ARV1	0.054088333	1
ENSG00000099889	ARVCF	-0.246255642	0.094080432
ENSG00000004848	ARX	-1.790042574	1
ENSG00000214435	AS3MT	0.159568408	1
ENSG00000104763	ASAH1	-0.516856886	7.35E-05
ENSG00000188611	ASAH2	0.124203974	1
ENSG00000204147	ASAH2B	-0.031123647	1
ENSG00000072444	ASAH2C	0.670824281	0.077307393
ENSG00000153317	ASAP1	0.448261049	7.73E-05
ENSG00000151693	ASAP2	0.121819073	0.897511855
ENSG00000088280	ASAP3	-0.609196451	0.000202703
ENSG00000065802	ASB1	0.119880131	0.905243422
ENSG00000146926	ASB10	1.968064759	1
ENSG00000165192	ASB11	1.8545911	0.488772154
ENSG00000198881	ASB12	-1.097715667	1
ENSG00000196372	ASB13	0.080625776	1
ENSG00000239388	ASB14	-0.144574623	0.929431569
ENSG00000146809	ASB15	-0.407491235	1
ENSG00000161664	ASB16	-0.9061817	9.66E-07
ENSG00000267080	ASB16-AS1	-0.826100511	1.07E-06
ENSG00000154007	ASB17	-1.790494539	1
ENSG00000182177	ASB18	-0.016453244	1
ENSG00000100628	ASB2	-2.565116257	1
ENSG00000005981	ASB4	-1.790494539	1
ENSG00000164122	ASB5	-0.717411532	1
ENSG00000148331	ASB6	0.692703299	1.53E-07
ENSG00000183475	ASB7	0.404281957	0.012237946
ENSG00000177981	ASB8	-0.168611193	0.722432122
ENSG00000102048	ASB9	-0.487133758	0.54610378
ENSG00000258527	ASB9P1	0.687849288	1
ENSG00000138303	ASCC1	-0.248572264	0.160628221
ENSG00000100325	ASCC2	0.159016967	0.783919238
ENSG00000112249	ASCC3	0.187036055	0.329596286
ENSG00000139352	ASCL1	1.328108762	0.688581822
ENSG00000183734	ASCL2	0	1
ENSG00000176009	ASCL3	-0.152393254	1
ENSG00000187855	ASCL4	0	1
ENSG00000232237	ASCL5	-0.339565861	0.895718179
ENSG00000111875	ASF1A	0.038178897	1
ENSG00000105011	ASF1B	-1.120470425	5.67E-13
ENSG00000141505	ASGR1	0.098415161	1
ENSG00000161944	ASGR2	0.981244876	1
ENSG00000116539	ASH1L	0.207674118	0.21722158
ENSG00000235919	ASH1L-AS1	0.227306629	0.99291541
ENSG00000227773	ASH1L-IT1	0.17812081	1
ENSG00000129691	ASH2L	-0.655847014	1.32E-06
ENSG00000224144	ASH2LP1	0.178022184	1
ENSG00000110881	ASIC1	0.869259366	2.11E-13
ENSG00000108684	ASIC2	0.200891331	0.402679833
ENSG00000213199	ASIC3	-0.450825506	0.398787476
ENSG00000072182	ASIC4	-0.071954019	1
ENSG00000256394	ASIC5	-1.124866857	0.566605329
ENSG00000101440	ASIP	0.283876803	0.10418676
ENSG00000126522	ASL	0.315998866	0.03820802
ENSG00000244723	ASLP1	0.06919528	1
ENSG00000196433	ASMT	1.198114845	0.385852701
ENSG00000169093	ASMTL	0.432022635	0.028978275
ENSG00000236017	ASMTL-AS1	0.163550021	1
ENSG00000198356	ASNA1	0.1036588	0.935558251
ENSG00000070669	ASNS	0.391721657	0.003037477
ENSG00000138381	ASNSD1	0.113083428	1
ENSG00000248498	ASNSP1	0.733934677	0.013056534
ENSG00000236554	ASNSP3	0	1
ENSG00000251470	ASNSP4	1.025089722	0.032466496
ENSG00000229683	ASNSP5	0.980902271	1
ENSG00000108381	ASPA	-0.016853611	1
ENSG00000204653	ASPDH	0.728715559	1
ENSG00000166183	ASPG	1.968064759	1
ENSG00000198363	ASPH	-0.366061266	0.001351872
ENSG00000174939	ASPHD1	0.120634635	0.977864067
ENSG00000128203	ASPHD2	0.547899871	2.12E-05
ENSG00000066279	ASPM	-0.760040124	1.33E-10
ENSG00000106819	ASPN	-0.595667537	1
ENSG00000244617	ASPRV1	0.298840699	1
ENSG00000169696	ASPSCR1	-0.071218803	1
ENSG00000162174	ASRGL1	0.240077473	0.198060672
ENSG00000130707	ASS1	1.318254734	1.48E-15
ENSG00000220517	ASS1P1	1.062264031	0.422936739
ENSG00000215325	ASS1P10	1.761965433	0.056373064
ENSG00000225308	ASS1P11	1.396714255	0.065587819
ENSG00000237437	ASS1P12	1.145462426	0.003615877
ENSG00000223922	ASS1P2	1.912705348	0.016855277
ENSG00000213487	ASS1P4	-0.017351595	1
ENSG00000227881	ASS1P5	3.096123572	0.0012557
ENSG00000215583	ASS1P6	2.10200472	0.141069952
ENSG00000236893	ASS1P7	1.476250305	0.521224271
ENSG00000217791	ASS1P9	0.496546192	1
ENSG00000034533	ASTE1	-0.335387426	0.224072574
ENSG00000188886	ASTL	1.60790566	0.305843913
ENSG00000152092	ASTN1	-0.222745625	0.312073247
ENSG00000148219	ASTN2	-0.013732989	1
ENSG00000064102	ASUN	0.444867352	0.00037922
ENSG00000171456	ASXL1	-0.147520665	0.489566073
ENSG00000143970	ASXL2	0.26249417	0.044238251
ENSG00000141431	ASXL3	0.128565229	1
ENSG00000154438	ASZ1	0.418181803	1
ENSG00000138138	ATAD1	0.556550752	1.68E-05
ENSG00000156802	ATAD2	-0.338597008	0.003239776
ENSG00000119778	ATAD2B	0.461183611	0.005891149
ENSG00000197785	ATAD3A	0.649669934	3.50E-09
ENSG00000160072	ATAD3B	1.088354182	2.85E-25
ENSG00000215915	ATAD3C	0.930586445	1.73E-08
ENSG00000176208	ATAD5	0.172227544	0.839452475
ENSG00000137343	ATAT1	-0.161888751	0.835583529
ENSG00000206488	ATAT1	0	1
ENSG00000223752	ATAT1	0	1
ENSG00000229061	ATAT1	0	1
ENSG00000231257	ATAT1	0	1
ENSG00000234549	ATAT1	0	1
ENSG00000235658	ATAT1	0	1
ENSG00000167654	ATCAY	0.072355035	1
ENSG00000107669	ATE1	0.122198839	1
ENSG00000123268	ATF1	0.124337569	1
ENSG00000219387	ATF1P1	1.968899115	1
ENSG00000115966	ATF2	-0.227391568	0.323755383
ENSG00000162772	ATF3	1.295880638	7.22E-28
ENSG00000128272	ATF4	0.296504708	0.01390846
ENSG00000213338	ATF4P1	0.552033868	0.18979533
ENSG00000231342	ATF4P2	0.659765903	0.106150447
ENSG00000228218	ATF4P3	0.327576148	0.022737819
ENSG00000256167	ATF4P4	0.279045297	0.081158868
ENSG00000169136	ATF5	0.266066733	0.086834574
ENSG00000118217	ATF6	0.059026841	1
ENSG00000168468	ATF6B	0	1
ENSG00000213676	ATF6B	-0.775751198	1.71E-11
ENSG00000228628	ATF6B	0	1
ENSG00000234539	ATF6B	0	1
ENSG00000170653	ATF7	-0.183835067	0.488772154
ENSG00000171681	ATF7IP	-0.285661975	0.082961065
ENSG00000166669	ATF7IP2	0.065214049	1
ENSG00000152348	ATG10	-0.223784492	0.109959247
ENSG00000248192	ATG10-AS1	0	1
ENSG00000236447	ATG10-IT1	0	1
ENSG00000145782	ATG12	0.448976802	0.000393162
ENSG00000224121	ATG12P2	0	1
ENSG00000175224	ATG13	0.042818471	1
ENSG00000126775	ATG14	0.623253092	4.81E-05
ENSG00000085978	ATG16L1	0.388395122	0.011668963
ENSG00000168010	ATG16L2	-0.493912717	0.00020651
ENSG00000110046	ATG2A	0.566510804	6.18E-07
ENSG00000066739	ATG2B	0.21166368	0.832886015
ENSG00000144848	ATG3	0.362456404	0.005955899
ENSG00000224357	ATG3P1	-0.153790911	1
ENSG00000101844	ATG4A	0.420557552	0.352041472
ENSG00000232735	ATG4AP1	1.872137011	1
ENSG00000168397	ATG4B	0.17145659	0.508093769
ENSG00000125703	ATG4C	0.121156889	1
ENSG00000130734	ATG4D	0.521617595	0.002218222
ENSG00000057663	ATG5	-0.089801572	1
ENSG00000197548	ATG7	0.128609232	0.839452475
ENSG00000198925	ATG9A	-0.102074454	0.937998083
ENSG00000181652	ATG9B	-0.193982828	0.99291541
ENSG00000142102	ATHL1	-0.01667673	1
ENSG00000138363	ATIC	-0.123068697	0.756778165
ENSG00000198513	ATL1	-0.828036704	0.005579438
ENSG00000119787	ATL2	0.261022372	0.083046609
ENSG00000184743	ATL3	-0.027550026	1
ENSG00000149311	ATM	-0.117413329	1
ENSG00000166454	ATMIN	-0.025892165	1
ENSG00000111676	ATN1	-0.06379285	1
ENSG00000172238	ATOH1	0.719457065	1
ENSG00000179774	ATOH7	1.396549687	1
ENSG00000168874	ATOH8	-2.166713199	0.000375254
ENSG00000177556	ATOX1	0.157527264	0.560149044
ENSG00000206190	ATP10A	0.025048916	1
ENSG00000118322	ATP10B	-0.312795628	1
ENSG00000145246	ATP10D	0.186606701	0.78996548
ENSG00000068650	ATP11A	0.10090125	0.944318859
ENSG00000232684	ATP11A-AS1	0.593947801	1
ENSG00000058063	ATP11B	-0.237251173	0.217069344
ENSG00000101974	ATP11C	0.235029249	0.391758744
ENSG00000075673	ATP12A	-0.714724623	1
ENSG00000105726	ATP13A1	0.228864513	0.27694489
ENSG00000159363	ATP13A2	-0.027562756	1
ENSG00000133657	ATP13A3	0.180876524	0.301805854
ENSG00000127249	ATP13A4	-0.422283601	0.281472406
ENSG00000225473	ATP13A4-AS1	0	1
ENSG00000187527	ATP13A5	0.181914038	1
ENSG00000236508	ATP13A5-AS1	1.968408083	1
ENSG00000163399	ATP1A1	0.021924942	1
ENSG00000203865	ATP1A1OS	0.072352176	1
ENSG00000018625	ATP1A2	-0.86463027	0.133717917
ENSG00000105409	ATP1A3	1.616343414	3.83E-38
ENSG00000132681	ATP1A4	0.231719022	1
ENSG00000143153	ATP1B1	-0.713850327	1.20E-10
ENSG00000249212	ATP1B1P1	-0.493204186	0.271026352
ENSG00000129244	ATP1B2	-0.315899002	1
ENSG00000069849	ATP1B3	0.171097039	0.422204469
ENSG00000244124	ATP1B3-AS1	-1.206154723	0.922847702
ENSG00000101892	ATP1B4	2.770503696	1
ENSG00000196296	ATP2A1	-0.173841058	1
ENSG00000174437	ATP2A2	0.281404914	0.019627814
ENSG00000074370	ATP2A3	0.341729569	0.047005655
ENSG00000070961	ATP2B1	0.070430422	1
ENSG00000157087	ATP2B2	-0.808911508	0.050889561
ENSG00000236999	ATP2B2-IT1	0	1
ENSG00000224771	ATP2B2-IT2	0	1
ENSG00000067842	ATP2B3	-0.932937832	0.503513495
ENSG00000058668	ATP2B4	-1.363734688	1.49E-29
ENSG00000017260	ATP2C1	-0.229783373	0.124922778
ENSG00000064270	ATP2C2	-0.099797959	1
ENSG00000105675	ATP4A	1.397221889	0.005071087
ENSG00000186009	ATP4B	0	1
ENSG00000152234	ATP5A1	-0.093615752	0.966720561
ENSG00000243268	ATP5A1P1	0.331101029	0.839452475
ENSG00000243382	ATP5A1P10	-0.631652447	0.091862213
ENSG00000227682	ATP5A1P2	-0.053007487	1
ENSG00000263232	ATP5A1P3	-0.176251	0.608340071
ENSG00000229489	ATP5A1P5	0.08035624	1
ENSG00000234861	ATP5A1P6	-0.210106359	1
ENSG00000241571	ATP5A1P7	-0.909642658	0.004839461
ENSG00000234720	ATP5A1P8	0.193348188	1
ENSG00000225995	ATP5A1P9	-0.111528886	1
ENSG00000110955	ATP5B	0.112375773	0.76395576
ENSG00000231635	ATP5BP1	0.139268366	1
ENSG00000165629	ATP5C1	-0.125706379	0.750353452
ENSG00000224004	ATP5C1P1	0.028067817	1
ENSG00000099624	ATP5D	0.358246992	0.010136549
ENSG00000124172	ATP5E	-0.134654663	0.626874191
ENSG00000250922	ATP5EP1	0	1
ENSG00000180389	ATP5EP2	-0.213886268	0.291380336
ENSG00000116459	ATP5F1	-0.083700636	1
ENSG00000224451	ATP5F1P1	-1.790494539	1
ENSG00000214342	ATP5F1P2	0.594960033	1
ENSG00000214003	ATP5F1P3	-0.104270543	1
ENSG00000214025	ATP5F1P4	-2.565017808	1
ENSG00000254944	ATP5F1P5	0.314650744	0.828831629
ENSG00000219806	ATP5F1P6	-0.035366098	1
ENSG00000261424	ATP5F1P7	-0.043279187	1
ENSG00000159199	ATP5G1	-0.232088738	0.28922182
ENSG00000230157	ATP5G1P1	0	1
ENSG00000242244	ATP5G1P3	-0.316445004	1
ENSG00000227440	ATP5G1P4	-0.083104127	1
ENSG00000227590	ATP5G1P5	-0.399050639	1
ENSG00000214318	ATP5G1P6	-0.29107846	1
ENSG00000232734	ATP5G1P7	0.060549823	1
ENSG00000224948	ATP5G1P8	-0.090618037	1
ENSG00000135390	ATP5G2	-0.540521874	5.08E-07
ENSG00000225712	ATP5G2P1	-0.803274891	0.008151445
ENSG00000230482	ATP5G2P3	-0.363465284	0.961657553
ENSG00000228847	ATP5G2P4	-0.481325393	0.007891956
ENSG00000154518	ATP5G3	0.003914823	1
ENSG00000167863	ATP5H	-0.574041171	8.12E-06
ENSG00000261679	ATP5HP1	-0.782670847	0.344154573
ENSG00000169020	ATP5I	-0.023136573	1
ENSG00000154723	ATP5J	0.014908811	1
ENSG00000241468	ATP5J2	0.054476167	1
ENSG00000248919	ATP5J2-PTCD1	0.129135221	0.665435137
ENSG00000224421	ATP5J2LP	0	1
ENSG00000232851	ATP5J2P3	-0.446757944	1
ENSG00000261102	ATP5J2P6	-2.564566651	1
ENSG00000237701	ATP5JP1	0.307975538	0.667088056
ENSG00000167283	ATP5L	-0.100503039	1
ENSG00000249222	ATP5L2	-0.159406683	1
ENSG00000232362	ATP5LP2	-0.475287034	0.06927745
ENSG00000249256	ATP5LP3	-0.037632863	1
ENSG00000225176	ATP5LP4	0.080244767	1
ENSG00000242561	ATP5LP5	0	1
ENSG00000267376	ATP5LP6	0	1
ENSG00000267189	ATP5LP7	1.968408083	1
ENSG00000241837	ATP5O	-0.172235904	0.365596352
ENSG00000125375	ATP5S	0.270967521	0.324789127
ENSG00000105341	ATP5SL	-0.312863144	0.059434317
ENSG00000071553	ATP6AP1	-0.389709332	0.001177671
ENSG00000205464	ATP6AP1L	-0.478621754	0.699337203
ENSG00000182220	ATP6AP2	-0.586634476	8.28E-07
ENSG00000033627	ATP6V0A1	0.281642482	0.19109154
ENSG00000185344	ATP6V0A2	0.202957123	0.719935852
ENSG00000105929	ATP6V0A4	0.069815985	1
ENSG00000117410	ATP6V0B	0.568590435	1.04E-07
ENSG00000185883	ATP6V0C	0.123646435	0.716774588
ENSG00000230201	ATP6V0CP1	-0.153136898	1
ENSG00000244142	ATP6V0CP2	1.968899115	1
ENSG00000213435	ATP6V0CP3	-0.023985034	1
ENSG00000159720	ATP6V0D1	0.164277411	0.409256543
ENSG00000147614	ATP6V0D2	0.415641642	0.438111834
ENSG00000113732	ATP6V0E1	0.144329578	0.615362903
ENSG00000225364	ATP6V0E1P1	0.207701322	1
ENSG00000223513	ATP6V0E1P2	-0.111138945	1
ENSG00000238038	ATP6V0E1P3	0.741436675	0.82278999
ENSG00000227883	ATP6V0E1P4	-1.790042574	1
ENSG00000171130	ATP6V0E2	-0.609111239	0.001419013
ENSG00000204934	ATP6V0E2-AS1	-0.472720441	0.018666365
ENSG00000114573	ATP6V1A	-0.307791023	0.051641101
ENSG00000116039	ATP6V1B1	0.289951885	0.159815751
ENSG00000147416	ATP6V1B2	0.032181042	1
ENSG00000155097	ATP6V1C1	0.46437449	5.13E-05
ENSG00000143882	ATP6V1C2	-0.382260479	0.001353261
ENSG00000100554	ATP6V1D	-0.289012612	0.031585905
ENSG00000131100	ATP6V1E1	0.2241248	0.198060672
ENSG00000225099	ATP6V1E1P1	-0.078434288	1
ENSG00000250565	ATP6V1E2	-0.06894157	1
ENSG00000128524	ATP6V1F	0.25808063	0.177292556
ENSG00000136888	ATP6V1G1	0.140323029	0.874571303
ENSG00000253502	ATP6V1G1P2	1.968899115	1
ENSG00000224662	ATP6V1G1P3	0.545469994	1
ENSG00000233343	ATP6V1G1P4	0	1
ENSG00000249372	ATP6V1G1P6	0	1
ENSG00000230474	ATP6V1G1P7	0	1
ENSG00000206445	ATP6V1G2	0	1
ENSG00000213760	ATP6V1G2	0.247159496	0.884165139
ENSG00000226850	ATP6V1G2	0	1
ENSG00000227587	ATP6V1G2	0	1
ENSG00000230900	ATP6V1G2	0	1
ENSG00000234668	ATP6V1G2	0	1
ENSG00000234920	ATP6V1G2	0	1
ENSG00000254870	ATP6V1G2-DDX39B	0.098913128	0.889570629
ENSG00000151418	ATP6V1G3	-2.564566651	1
ENSG00000047249	ATP6V1H	0.407049783	0.003063042
ENSG00000165240	ATP7A	-0.132608202	0.715620694
ENSG00000123191	ATP7B	0.576721353	4.36E-06
ENSG00000124406	ATP8A1	0.118480225	1
ENSG00000132932	ATP8A2	-0.400867917	0.216545006
ENSG00000240800	ATP8A2P1	0.532974928	1
ENSG00000229800	ATP8A2P2	-2.565017808	1
ENSG00000233963	ATP8A2P3	0.55311477	1
ENSG00000081923	ATP8B1	-0.12628515	1
ENSG00000143515	ATP8B2	-0.477695466	3.91E-05
ENSG00000130270	ATP8B3	-0.398977733	0.029591731
ENSG00000104043	ATP8B4	0.276331947	1
ENSG00000179766	ATP8B5P	-0.726821897	0.022633898
ENSG00000054793	ATP9A	-0.198837192	0.390914283
ENSG00000166377	ATP9B	0.068910475	1
ENSG00000123472	ATPAF1	-0.337603159	0.027153542
ENSG00000171953	ATPAF2	0.406031323	0.021045478
ENSG00000134146	ATPBD4	0.042257026	1
ENSG00000248079	ATPBD4-AS1	0.861413193	0.286461387
ENSG00000130770	ATPIF1	-0.632548656	4.75E-07
ENSG00000175054	ATR	-0.201106414	0.36451014
ENSG00000138085	ATRAID	-0.560731246	1.88E-05
ENSG00000164053	ATRIP	0.168249706	0.699799606
ENSG00000088812	ATRN	-0.045024093	1
ENSG00000107518	ATRNL1	-0.077082989	1
ENSG00000085224	ATRX	-0.458904755	0.000149293
ENSG00000124788	ATXN1	-0.33008755	0.101798002
ENSG00000130638	ATXN10	-0.015121985	1
ENSG00000224470	ATXN1L	0.327506308	0.007581901
ENSG00000204842	ATXN2	0.311986074	0.026931676
ENSG00000168488	ATXN2L	0.152483263	0.456154735
ENSG00000066427	ATXN3	-0.375155826	0.549574577
ENSG00000123594	ATXN3L	1.968408083	1
ENSG00000163635	ATXN7	0.248450175	0.126199805
ENSG00000146776	ATXN7L1	-0.303950521	0.173546636
ENSG00000162650	ATXN7L2	0.433325651	0.00207275
ENSG00000087152	ATXN7L3	-0.149938442	0.533060769
ENSG00000253719	ATXN7L3B	0.087723788	1
ENSG00000230223	ATXN8OS	-2.565116257	1
ENSG00000148090	AUH	0.492801807	0.005204626
ENSG00000127423	AUNIP	0.202466032	0.463507762
ENSG00000115307	AUP1	0.517920124	7.84E-07
ENSG00000087586	AURKA	-0.353426581	0.004553758
ENSG00000175756	AURKAIP1	0.028216733	1
ENSG00000213033	AURKAPS1	-0.267672993	0.425347677
ENSG00000178999	AURKB	-0.232577236	0.210693955
ENSG00000105146	AURKC	0.386233924	0.034356889
ENSG00000158321	AUTS2	-0.1791046	0.448297084
ENSG00000169857	AVEN	-0.029155929	1
ENSG00000135407	AVIL	0.570404179	0.138452419
ENSG00000105778	AVL9	-0.008406818	1
ENSG00000101200	AVP	0	1
ENSG00000119986	AVPI1	0.53140428	0.001613265
ENSG00000166148	AVPR1A	1.968899115	1
ENSG00000198049	AVPR1B	1.968408083	1
ENSG00000126895	AVPR2	-1.416587509	0.688581822
ENSG00000204195	AWAT1	2.77084622	1
ENSG00000147160	AWAT2	1.968064759	1
ENSG00000162779	AXDND1	-0.351806662	0.309430339
ENSG00000103126	AXIN1	0.563520995	2.60E-06
ENSG00000168646	AXIN2	-0.113157268	1
ENSG00000167601	AXL	-1.126578556	5.00E-31
ENSG00000160862	AZGP1	-0.524791849	1
ENSG00000214313	AZGP1P1	0	1
ENSG00000214252	AZGP1P2	0	1
ENSG00000141577	AZI1	-0.734426208	9.59E-09
ENSG00000163512	AZI2	-0.328450338	0.101294766
ENSG00000155096	AZIN1	0.100489046	0.922847702
ENSG00000172232	AZU1	2.77133639	1
ENSG00000166710	B2M	-0.254254621	0.052293556
ENSG00000169255	B3GALNT1	0.335171874	0.135016543
ENSG00000162885	B3GALNT2	0.295109738	0.118350369
ENSG00000172318	B3GALT1	-0.072496217	1
ENSG00000162630	B3GALT2	0	1
ENSG00000206285	B3GALT4	0	1
ENSG00000226936	B3GALT4	0	1
ENSG00000235155	B3GALT4	0	1
ENSG00000235863	B3GALT4	2.771679111	1
ENSG00000236802	B3GALT4	0	1
ENSG00000183778	B3GALT5	-0.871402159	0.008278328
ENSG00000176022	B3GALT6	0.282311165	0.532376554
ENSG00000187676	B3GALTL	-0.604336535	0.000547088
ENSG00000109956	B3GAT1	-0.301999347	0.688581822
ENSG00000112309	B3GAT2	0.026399903	1
ENSG00000149541	B3GAT3	-0.167482314	0.624805408
ENSG00000174684	B3GNT1	-0.47457485	0.020747998
ENSG00000170340	B3GNT2	0.232235974	0.532376554
ENSG00000179913	B3GNT3	-1.296784193	1.08E-09
ENSG00000176383	B3GNT4	-0.090249152	1
ENSG00000176597	B3GNT5	0.028362401	1
ENSG00000198488	B3GNT6	3.284904551	0.839452475
ENSG00000156966	B3GNT7	-0.293610864	1
ENSG00000177191	B3GNT8	1.493639466	1
ENSG00000237172	B3GNT9	-0.101900174	1
ENSG00000175711	B3GNTL1	-0.070739305	1
ENSG00000135454	B4GALNT1	-0.871878084	2.68E-16
ENSG00000167080	B4GALNT2	-0.308456271	1
ENSG00000139044	B4GALNT3	0.123916965	1
ENSG00000182272	B4GALNT4	0.117844701	0.884354995
ENSG00000086062	B4GALT1	-0.246499937	0.069148942
ENSG00000117411	B4GALT2	0.253137452	0.052447526
ENSG00000158850	B4GALT3	0.435035255	0.000365846
ENSG00000121578	B4GALT4	-0.171644764	0.598040565
ENSG00000240254	B4GALT4-AS1	-0.118186253	1
ENSG00000158470	B4GALT5	0.392365145	0.000480759
ENSG00000118276	B4GALT6	0.08596475	1
ENSG00000027847	B4GALT7	-0.037744377	1
ENSG00000108641	B9D1	-0.451216925	0.054283192
ENSG00000123810	B9D2	-0.064594037	1
ENSG00000164929	BAALC	-1.367202964	0.333043958
ENSG00000136881	BAAT	1.217994907	0.141069952
ENSG00000227411	BAATP1	0.17757022	1
ENSG00000105393	BABAM1	-0.196567156	0.355920049
ENSG00000186318	BACE1	-0.725918667	0.000112464
ENSG00000182240	BACE2	0.020007453	1
ENSG00000224388	BACE2-IT1	0	1
ENSG00000156273	BACH1	-0.027991882	1
ENSG00000232118	BACH1-AS1	-0.469574574	1
ENSG00000248476	BACH1-IT1	0.36385246	0.699848946
ENSG00000228817	BACH1-IT2	1.968899115	1
ENSG00000234293	BACH1-IT3	0	1
ENSG00000112182	BACH2	0.809471574	2.79E-06
ENSG00000002330	BAD	-0.82257279	7.24E-08
ENSG00000107262	BAG1	0.871345536	2.18E-14
ENSG00000112208	BAG2	0.245518248	0.133275694
ENSG00000151929	BAG3	0.756535846	1.81E-12
ENSG00000156735	BAG4	0.206288003	0.739495846
ENSG00000166170	BAG5	0.407565859	0.011222435
ENSG00000096155	BAG6	0	1
ENSG00000204463	BAG6	0.170944568	0.31910794
ENSG00000227761	BAG6	0	1
ENSG00000228760	BAG6	0	1
ENSG00000229524	BAG6	0	1
ENSG00000233348	BAG6	0	1
ENSG00000234651	BAG6	0	1
ENSG00000187172	BAGE2	0.776912087	7.88E-07
ENSG00000268590	BAGE5	0	1
ENSG00000171282	BAHCC1	-0.351819464	0.204250631
ENSG00000140320	BAHD1	0.348188857	0.00958763
ENSG00000181790	BAI1	0.700739672	4.47E-11
ENSG00000121753	BAI2	-0.703838306	2.85E-10
ENSG00000135298	BAI3	0.460866396	0.446128912
ENSG00000175866	BAIAP2	-0.190995248	0.239290047
ENSG00000226137	BAIAP2-AS1	-1.60095978	6.84E-36
ENSG00000006453	BAIAP2L1	-0.234635249	0.095524073
ENSG00000128298	BAIAP2L2	-0.244328872	0.75939249
ENSG00000007516	BAIAP3	-0.220132029	0.508680352
ENSG00000030110	BAK1	0.097387753	1
ENSG00000175730	BAK1P1	0.169912223	0.688581822
ENSG00000236616	BAK1P2	-0.043748722	1
ENSG00000095739	BAMBI	-0.053601017	1
ENSG00000175334	BANF1	-0.247866421	0.088184213
ENSG00000258531	BANF1P1	-0.128420675	1
ENSG00000230306	BANF1P2	-0.005124852	1
ENSG00000237758	BANF1P3	-0.238040632	0.363969396
ENSG00000223828	BANF1P4	-0.467027395	0.854768926
ENSG00000225935	BANF1P5	-1.765441902	0.783919238
ENSG00000125888	BANF2	-0.29434583	1
ENSG00000153064	BANK1	-0.230668713	1
ENSG00000172530	BANP	0.439986161	0.004310828
ENSG00000163930	BAP1	-0.077923098	1
ENSG00000138376	BARD1	-0.343954961	0.104171027
ENSG00000125492	BARHL1	1.968408083	1
ENSG00000143032	BARHL2	0	1
ENSG00000131668	BARX1	0.227980256	1
ENSG00000043039	BARX2	-0.100064828	1
ENSG00000176788	BASP1	-0.159463101	1
ENSG00000230535	BASP1P1	0	1
ENSG00000156127	BATF	0.893995983	1
ENSG00000168062	BATF2	0.706251155	0.554136529
ENSG00000123685	BATF3	0.911200858	2.55E-08
ENSG00000087088	BAX	0.04131606	1
ENSG00000198604	BAZ1A	0.845339856	1.03E-13
ENSG00000009954	BAZ1B	-0.053540918	1
ENSG00000076108	BAZ2A	0.229599262	0.090505356
ENSG00000123636	BAZ2B	-0.379386517	0.029491316
ENSG00000105327	BBC3	0.614167616	0.000207186
ENSG00000214413	BBIP1	-0.059178409	1
ENSG00000129151	BBOX1	-1.394518571	0.597492478
ENSG00000174483	BBS1	0.383463899	0.039049154
ENSG00000179941	BBS10	-0.635518084	0.030323583
ENSG00000181004	BBS12	-0.242561871	1
ENSG00000125124	BBS2	0.277225364	0.082495482
ENSG00000140463	BBS4	-0.744181661	0.00357965
ENSG00000163093	BBS5	0.525918606	0.079180304
ENSG00000138686	BBS7	0.198604416	0.460438627
ENSG00000122507	BBS9	-0.224463408	0.781862823
ENSG00000114439	BBX	0.200343908	0.285462612
ENSG00000187244	BCAM	-1.201196725	5.56E-16
ENSG00000132692	BCAN	-0.578133206	2.02E-07
ENSG00000075790	BCAP29	-0.486784994	0.001385294
ENSG00000185825	BCAP31	0.174613199	0.313332495
ENSG00000050820	BCAR1	-0.35126373	0.005802998
ENSG00000137936	BCAR3	-0.223413481	0.403997235
ENSG00000262117	BCAR4	0.178365508	1
ENSG00000064787	BCAS1	0.359117972	1
ENSG00000116752	BCAS2	-0.102559747	1
ENSG00000255051	BCAS2P1	0.426989048	0.882610415
ENSG00000234332	BCAS2P2	0.155521041	1
ENSG00000226670	BCAS2P3	0.103094717	1
ENSG00000141376	BCAS3	-0.194402907	0.289128624
ENSG00000124243	BCAS4	-1.132733082	2.07E-17
ENSG00000060982	BCAT1	-0.014660237	1
ENSG00000105552	BCAT2	-0.297099998	0.239488857
ENSG00000107949	BCCIP	0.357577875	0.00421303
ENSG00000186666	BCDIN3D	0.100034424	1
ENSG00000258057	BCDIN3D-AS1	0.100982641	1
ENSG00000114200	BCHE	-1.048146387	0.074281962
ENSG00000248098	BCKDHA	0.60201992	6.74E-07
ENSG00000083123	BCKDHB	-0.276366688	0.971799595
ENSG00000103507	BCKDK	-0.314421846	0.038854952
ENSG00000142867	BCL10	0.004831636	1
ENSG00000119866	BCL11A	0.775888771	1.20E-07
ENSG00000127152	BCL11B	0.13752299	1
ENSG00000171791	BCL2	-0.03348695	1
ENSG00000140379	BCL2A1	0.624284404	1
ENSG00000171552	BCL2L1	-0.782329852	1.47E-13
ENSG00000137875	BCL2L10	0	1
ENSG00000153094	BCL2L11	0.507554113	0.00131588
ENSG00000126453	BCL2L12	0.138081838	0.813084493
ENSG00000099968	BCL2L13	-0.07114019	1
ENSG00000121380	BCL2L14	-0.054066901	1
ENSG00000188761	BCL2L15	3.123877486	0.052662853
ENSG00000129473	BCL2L2	-0.075782378	1
ENSG00000258643	BCL2L2-PABPN1	-0.047320924	1
ENSG00000069399	BCL3	-1.230017251	6.74E-19
ENSG00000113916	BCL6	-0.484266391	0.013653722
ENSG00000161940	BCL6B	1.535547497	0.488772154
ENSG00000110987	BCL7A	0.46467811	0.076671777
ENSG00000106635	BCL7B	0.215326148	0.278977545
ENSG00000099385	BCL7C	-0.530382698	0.000148509
ENSG00000116128	BCL9	-0.238910161	0.13432257
ENSG00000186174	BCL9L	-0.486378964	7.58E-06
ENSG00000029363	BCLAF1	0.209988148	0.1758864
ENSG00000135697	BCMO1	0.456558053	1
ENSG00000197580	BCO2	0.266384722	0.591364096
ENSG00000183337	BCOR	0.548901108	3.74E-06
ENSG00000085185	BCORL1	0.262957903	0.215041339
ENSG00000215580	BCORP1	0.981146251	1
ENSG00000186716	BCR	-0.337728824	0.839452475
ENSG00000225098	BCRP1	0.237388541	1
ENSG00000169668	BCRP2	0.54950083	0.020577237
ENSG00000215481	BCRP3	0.598589557	0.748493737
ENSG00000215456	BCRP4	0.406690368	1
ENSG00000235062	BCRP5	-0.961256583	1
ENSG00000169662	BCRP6	0.60486426	0.704505437
ENSG00000215544	BCRP7	0.162467317	1
ENSG00000236794	BCRP8	0	1
ENSG00000074582	BCS1L	0.411348638	0.002059494
ENSG00000236824	BCYRN1	-0.324116488	1
ENSG00000161267	BDH1	0.673871603	9.45E-07
ENSG00000164039	BDH2	-0.586756258	0.036913997
ENSG00000232699	BDH2P1	-0.580881951	0.17547989
ENSG00000100739	BDKRB1	-0.470691001	0.246200735
ENSG00000168398	BDKRB2	-0.057306775	1
ENSG00000176697	BDNF	0.271548194	0.624805408
ENSG00000245573	BDNF-AS	-0.024752566	1
ENSG00000145734	BDP1	0.612943956	1.32E-07
ENSG00000264736	BDP1P	0.407549215	1
ENSG00000166546	BEAN1	-1.013110459	0.014018919
ENSG00000126581	BECN1	0.406168857	0.002408343
ENSG00000196289	BECN1P1	0	1
ENSG00000183092	BEGAIN	0.264781266	1
ENSG00000177324	BEND2	0.712301179	0.818588139
ENSG00000178409	BEND3	0.641266544	1.03E-05
ENSG00000224809	BEND3P2	0.125397231	1
ENSG00000224886	BEND3P3	0.071558317	1
ENSG00000188848	BEND4	0.060714896	1
ENSG00000162373	BEND5	-2.62568683	8.98E-06
ENSG00000151917	BEND6	-0.814295142	4.21E-06
ENSG00000165626	BEND7	-0.163939139	0.749180474
ENSG00000167995	BEST1	-0.951968096	1.05E-18
ENSG00000039987	BEST2	-0.29534494	1
ENSG00000127325	BEST3	0.243075689	1
ENSG00000142959	BEST4	0.798888327	0.87943317
ENSG00000105829	BET1	-0.225667987	0.768727164
ENSG00000177951	BET1L	0.005936296	1
ENSG00000173626	BET3L	-1.231004786	0.001098445
ENSG00000133169	BEX1	-0.219996573	0.48456063
ENSG00000133134	BEX2	0.982774353	2.37E-06
ENSG00000102409	BEX4	0.294176982	0.252790574
ENSG00000184515	BEX5	0.300279206	1
ENSG00000103429	BFAR	-0.021101238	1
ENSG00000125864	BFSP1	-0.076253771	1
ENSG00000170819	BFSP2	-0.703908908	0.559446927
ENSG00000242252	BGLAP	-0.672284034	0.922847702
ENSG00000182492	BGN	0.206318582	1
ENSG00000180535	BHLHA15	1.603703055	1.15E-05
ENSG00000205899	BHLHA9	0	1
ENSG00000198908	BHLHB9	-0.581154578	0.138452419
ENSG00000180828	BHLHE22	0	1
ENSG00000125533	BHLHE23	1.968064759	1
ENSG00000134107	BHLHE40	-0.166660465	0.422105202
ENSG00000235831	BHLHE40-AS1	-0.04764528	1
ENSG00000123095	BHLHE41	0.285465536	0.358187723
ENSG00000145692	BHMT	0.719262678	1
ENSG00000132840	BHMT2	0.205387439	1
ENSG00000122870	BICC1	0.110242657	1
ENSG00000151746	BICD1	0.336805666	0.016460234
ENSG00000185963	BICD2	0.547403712	4.54E-07
ENSG00000015475	BID	0.250359427	0.136764897
ENSG00000100290	BIK	-0.186573324	1
ENSG00000136717	BIN1	0.171998327	0.441767037
ENSG00000110934	BIN2	0.383616966	1
ENSG00000234568	BIN2P1	0	1
ENSG00000248684	BIN2P2	0	1
ENSG00000147439	BIN3	0.295959184	0.072105825
ENSG00000110330	BIRC2	-0.35760606	0.01840819
ENSG00000023445	BIRC3	-0.587731533	2.97E-06
ENSG00000089685	BIRC5	-0.183141957	0.264691531
ENSG00000115760	BIRC6	0.35905171	0.002141232
ENSG00000230046	BIRC6-AS1	0.571051775	0.670047747
ENSG00000101197	BIRC7	-0.597051498	1
ENSG00000163098	BIRC8	-0.596158569	1
ENSG00000134897	BIVM	0.651555441	0.015515424
ENSG00000204960	BLACE	-0.524179715	1
ENSG00000166619	BLCAP	0.341866745	0.012779083
ENSG00000259571	BLID	0	1
ENSG00000136573	BLK	-0.025010945	1
ENSG00000197299	BLM	-0.239443577	0.298253375
ENSG00000108578	BLMH	0.523951633	1.10E-05
ENSG00000095585	BLNK	0.352791859	1
ENSG00000135441	BLOC1S1	-0.664878602	4.48E-07
ENSG00000196072	BLOC1S2	-0.009451258	1
ENSG00000189114	BLOC1S3	0.85184559	2.46E-06
ENSG00000186222	BLOC1S4	0.391784294	0.113780787
ENSG00000188428	BLOC1S5	0.067864155	1
ENSG00000259040	BLOC1S5-TXNDC5	0.101564216	0.871638989
ENSG00000104164	BLOC1S6	-0.104701066	1
ENSG00000106605	BLVRA	-0.791616113	3.50E-05
ENSG00000090013	BLVRB	-0.995138876	2.14E-16
ENSG00000117475	BLZF1	0.26248415	0.231631216
ENSG00000104081	BMF	-2.447196197	1.64E-05
ENSG00000168283	BMI1	-0.186837134	0.294511976
ENSG00000168487	BMP1	-0.573762761	9.03E-07
ENSG00000163217	BMP10	0	1
ENSG00000130385	BMP15	0	1
ENSG00000125845	BMP2	1.450074118	7.91E-13
ENSG00000138756	BMP2K	-0.305654097	0.094080432
ENSG00000204113	BMP2KL	0.009357585	1
ENSG00000152785	BMP3	-1.469388947	1
ENSG00000125378	BMP4	-0.529443014	0.071316611
ENSG00000112175	BMP5	-0.124054475	1
ENSG00000153162	BMP6	1.886952974	4.49E-22
ENSG00000236323	BMP6P1	-2.565116257	1
ENSG00000101144	BMP7	0.560536209	0.001058295
ENSG00000183682	BMP8A	0.320539986	0.630581358
ENSG00000116985	BMP8B	0.133686051	1
ENSG00000164619	BMPER	0.480592512	1
ENSG00000107779	BMPR1A	-0.097485116	1
ENSG00000219642	BMPR1APS1	-0.39800882	0.409654971
ENSG00000232460	BMPR1APS2	0.093802444	1
ENSG00000138696	BMPR1B	0.857975992	7.40E-08
ENSG00000204217	BMPR2	-0.363168633	0.016696224
ENSG00000165733	BMS1	0.481334014	4.26E-06
ENSG00000204177	BMS1P1	0.217598062	1
ENSG00000251079	BMS1P2	0.698791875	0.063544446
ENSG00000240089	BMS1P3	0.18001422	1
ENSG00000242338	BMS1P4	0.707662706	0.000122251
ENSG00000251500	BMS1P5	0.638703766	0.10900139
ENSG00000251070	BMS1P6	0.241649993	0.903680686
ENSG00000243899	BMS1P7	0.203133179	1
ENSG00000102010	BMX	-0.127872707	0.957166557
ENSG00000169594	BNC1	0.022215567	1
ENSG00000173068	BNC2	-1.113095785	1.00E-14
ENSG00000113734	BNIP1	0.503451276	0.00464167
ENSG00000140299	BNIP2	0.169839455	0.433943811
ENSG00000176171	BNIP3	-0.170435301	0.699337203
ENSG00000104765	BNIP3L	-1.295343378	9.66E-27
ENSG00000197358	BNIP3P1	-0.533747399	0.005379175
ENSG00000236097	BNIP3P2	1.979367505	0.146127097
ENSG00000265631	BNIP3P3	1.846308671	0.305843913
ENSG00000163141	BNIPL	-0.571873588	1
ENSG00000144857	BOC	0.663010209	0.000375722
ENSG00000145919	BOD1	0.252952456	0.127360971
ENSG00000038219	BOD1L1	0.52704918	3.42E-05
ENSG00000228075	BOD1L2	0.915720114	0.03799682
ENSG00000176720	BOK	-0.005059969	1
ENSG00000234235	BOK-AS1	-0.881459002	0.00113051
ENSG00000178096	BOLA1	0.492524252	0.012144343
ENSG00000183336	BOLA2	0.120302824	1
ENSG00000169627	BOLA2B	0.056878388	1
ENSG00000163170	BOLA3	0.147619401	0.895344496
ENSG00000225439	BOLA3-AS1	0.401556917	0.306387625
ENSG00000152430	BOLL	-0.659226298	0.516628954
ENSG00000170727	BOP1	0.505560629	1.03E-06
ENSG00000136122	BORA	-0.405535537	0.326105407
ENSG00000232416	BPESC1	-2.565567584	1
ENSG00000172331	BPGM	-0.15794712	1
ENSG00000137274	BPHL	-0.294685481	1
ENSG00000101425	BPI	-0.111787966	1
ENSG00000198183	BPIFA1	0.17812081	1
ENSG00000131050	BPIFA2	-0.016708363	1
ENSG00000131059	BPIFA3	-1.790494539	1
ENSG00000183566	BPIFA4P	-1.789943949	1
ENSG00000125999	BPIFB1	1.167373936	0.597492478
ENSG00000078898	BPIFB2	0	1
ENSG00000186190	BPIFB3	0.17885654	1
ENSG00000186191	BPIFB4	-1.574883195	0.133398611
ENSG00000233146	BPIFB5P	-0.315246393	1
ENSG00000167104	BPIFB6	0	1
ENSG00000125997	BPIFB9P	-0.099899738	1
ENSG00000184459	BPIFC	0.750242713	0.922847702
ENSG00000162813	BPNT1	0.364909796	0.055390502
ENSG00000171634	BPTF	0.15301808	0.496998718
ENSG00000183753	BPY2	0	1
ENSG00000183795	BPY2B	0	1
ENSG00000185894	BPY2C	0	1
ENSG00000229745	BPY2DP	0	1
ENSG00000157764	BRAF	0.255822859	0.353204542
ENSG00000224775	BRAFP1	0.413230249	0.697249951
ENSG00000089234	BRAP	0.579596231	8.50E-06
ENSG00000106009	BRAT1	0.368220095	0.001937738
ENSG00000012048	BRCA1	-0.225309772	0.155951519
ENSG00000139618	BRCA2	-0.081298466	1
ENSG00000185515	BRCC3	-0.359378424	0.038008907
ENSG00000100425	BRD1	0.752797524	4.84E-10
ENSG00000204256	BRD2	0.450182779	2.02E-05
ENSG00000215077	BRD2	0	1
ENSG00000230678	BRD2	0	1
ENSG00000234507	BRD2	0	1
ENSG00000234704	BRD2	0	1
ENSG00000235307	BRD2	0	1
ENSG00000236227	BRD2	0	1
ENSG00000223837	BRD2-IT1	0.61717727	1
ENSG00000225788	BRD2-IT1	0	1
ENSG00000228104	BRD2-IT1	0	1
ENSG00000234673	BRD2-IT1	0	1
ENSG00000236657	BRD2-IT1	0	1
ENSG00000237348	BRD2-IT1	0	1
ENSG00000169925	BRD3	-0.476487886	0.003252502
ENSG00000141867	BRD4	0.254378862	0.067153077
ENSG00000166164	BRD7	-0.009691498	1
ENSG00000259043	BRD7P1	-0.733205325	0.845518412
ENSG00000169075	BRD7P3	0.510947256	1
ENSG00000218676	BRD7P4	-0.001138001	1
ENSG00000235768	BRD7P5	-0.314577178	1
ENSG00000235289	BRD7P6	0	1
ENSG00000112983	BRD8	-0.282481041	0.032946325
ENSG00000028310	BRD9	0.636965058	5.49E-10
ENSG00000137948	BRDT	0.913597281	0.720076559
ENSG00000158019	BRE	-0.550720698	1.41E-05
ENSG00000185024	BRF1	0.180964714	0.75215906
ENSG00000104221	BRF2	-0.010228377	1
ENSG00000164713	BRI3	-0.211460268	0.198544296
ENSG00000184992	BRI3BP	0.204641336	0.468931154
ENSG00000225169	BRI3P1	-0.366579396	0.80200422
ENSG00000182685	BRICD5	-0.544131586	0.068694399
ENSG00000136492	BRIP1	-0.820186367	1.34E-09
ENSG00000113460	BRIX1	0.59351271	1.28E-07
ENSG00000254999	BRK1	-0.247087223	0.109110338
ENSG00000227983	BRK1P2	0	1
ENSG00000174744	BRMS1	0.374764988	0.002622617
ENSG00000100916	BRMS1L	0.175152148	0.607341379
ENSG00000162819	BROX	0.185830508	0.634848828
ENSG00000156983	BRPF1	0.98491586	2.06E-18
ENSG00000096070	BRPF3	-0.360272957	0.005999642
ENSG00000102239	BRS3	-1.789943949	1
ENSG00000160469	BRSK1	0.605948006	0.00027082
ENSG00000174672	BRSK2	0.115392969	1
ENSG00000185658	BRWD1	0.24484348	0.401199343
ENSG00000238141	BRWD1-AS1	1.097063152	1
ENSG00000237373	BRWD1-IT1	0.676453578	1
ENSG00000255568	BRWD1-IT2	0.17812081	1
ENSG00000165288	BRWD3	-0.015958034	1
ENSG00000168000	BSCL2	0.366117881	0.08357691
ENSG00000160058	BSDC1	-0.369735153	0.006803755
ENSG00000172270	BSG	-0.040132866	1
ENSG00000164061	BSN	-0.438448039	0.811539084
ENSG00000235120	BSN-AS1	-1.789943949	1
ENSG00000226913	BSN-AS2	0.47669747	1
ENSG00000162399	BSND	0.178022184	1
ENSG00000188334	BSPH1	-0.152793243	1
ENSG00000119411	BSPRY	-2.564566651	1
ENSG00000109743	BST1	-0.257109063	0.444769662
ENSG00000130303	BST2	-1.7642499	0.783919238
ENSG00000188909	BSX	1.493199032	1
ENSG00000095564	BTAF1	0.312132322	0.022552778
ENSG00000064726	BTBD1	0.151201386	0.639263335
ENSG00000148925	BTBD10	-0.144092581	0.96119205
ENSG00000151136	BTBD11	0.295647715	1
ENSG00000138152	BTBD16	0.231279992	1
ENSG00000204347	BTBD17	-1.790494539	1
ENSG00000233436	BTBD18	1.642684874	0.922847702
ENSG00000222009	BTBD19	-0.068906899	1
ENSG00000133243	BTBD2	-0.923764071	1.37E-08
ENSG00000132640	BTBD3	-0.077722591	1
ENSG00000184887	BTBD6	0.178464133	1
ENSG00000011114	BTBD7	-0.014977397	1
ENSG00000203414	BTBD7P1	-0.38074412	1
ENSG00000237618	BTBD7P2	0	1
ENSG00000189195	BTBD8	-0.427263383	0.009246475
ENSG00000183826	BTBD9	0.017299806	1
ENSG00000226533	BTBD9-AS1	0	1
ENSG00000174808	BTC	-0.112177329	1
ENSG00000169814	BTD	-0.587375534	0.004583763
ENSG00000145741	BTF3	0.027330175	1
ENSG00000134717	BTF3L4	-0.042292536	1
ENSG00000232260	BTF3L4P1	-0.345367022	0.87253672
ENSG00000213189	BTF3L4P2	-0.112797392	1
ENSG00000213108	BTF3L4P3	0.554953945	0.411587445
ENSG00000229226	BTF3L4P4	0	1
ENSG00000231120	BTF3P10	-0.136228012	0.918721707
ENSG00000118903	BTF3P11	0.353378973	1
ENSG00000213003	BTF3P12	-0.015316771	1
ENSG00000227118	BTF3P13	-0.314583034	0.432525167
ENSG00000262609	BTF3P14	-0.225131008	1
ENSG00000237242	BTF3P15	0	1
ENSG00000258282	BTF3P2	0.185300969	0.881182272
ENSG00000224820	BTF3P4	0.135520119	1
ENSG00000233594	BTF3P5	0.193792681	0.951306621
ENSG00000233956	BTF3P6	0.868848065	1
ENSG00000219986	BTF3P7	-0.248126384	0.659332583
ENSG00000236813	BTF3P8	-0.070935921	1
ENSG00000224834	BTF3P9	-0.21969774	0.811508743
ENSG00000133639	BTG1	0.128338979	1
ENSG00000159388	BTG2	0.306380461	0.081678634
ENSG00000154640	BTG3	0.243261451	0.146282691
ENSG00000137707	BTG4	-0.271870278	1
ENSG00000010671	BTK	0.62709411	1
ENSG00000186265	BTLA	1.167138212	0.597492478
ENSG00000124557	BTN1A1	0.17885654	1
ENSG00000112763	BTN2A1	0.206753508	0.497863182
ENSG00000124508	BTN2A2	-0.327555867	0.184992284
ENSG00000124549	BTN2A3P	0.473657034	0.234878371
ENSG00000026950	BTN3A1	-1.032042812	3.93E-07
ENSG00000186470	BTN3A2	-0.462464117	0.021630431
ENSG00000111801	BTN3A3	-0.690120791	0.007475628
ENSG00000215811	BTNL10	1.968064759	1
ENSG00000204290	BTNL2	-1.005984823	0.300145573
ENSG00000224242	BTNL2	0	1
ENSG00000224770	BTNL2	0	1
ENSG00000225412	BTNL2	0	1
ENSG00000225845	BTNL2	0	1
ENSG00000226127	BTNL2	0	1
ENSG00000229597	BTNL2	0	1
ENSG00000229741	BTNL2	0	1
ENSG00000168903	BTNL3	-0.693312012	1
ENSG00000113303	BTNL8	-0.182711332	0.91855114
ENSG00000165810	BTNL9	-0.109866901	1
ENSG00000166167	BTRC	-0.031581581	1
ENSG00000169679	BUB1	-0.229092375	0.111726321
ENSG00000156970	BUB1B	-0.085076312	1
ENSG00000154473	BUB3	-0.006196247	1
ENSG00000137656	BUD13	0.061464965	1
ENSG00000106245	BUD31	0.082055553	1
ENSG00000112276	BVES	2.627561835	0.349636506
ENSG00000203808	BVES-AS1	1.494030267	1
ENSG00000112578	BYSL	0.621309228	1.85E-08
ENSG00000005379	BZRAP1	-0.071163721	1
ENSG00000265148	BZRAP1-AS1	0.190368939	0.317480892
ENSG00000082153	BZW1	0.026986222	1
ENSG00000236686	BZW1P1	-0.061469916	1
ENSG00000198406	BZW1P2	0.095024028	1
ENSG00000136261	BZW2	0.596166553	1.68E-08
ENSG00000165507	C10orf10	-1.763009762	7.00E-17
ENSG00000214688	C10orf105	0.17757022	1
ENSG00000183346	C10orf107	-2.840890238	0.086353222
ENSG00000148655	C10orf11	0.1974687	1
ENSG00000176236	C10orf111	0.238732486	1
ENSG00000204740	C10orf112	-0.020405362	1
ENSG00000204683	C10orf113	0	1
ENSG00000204682	C10orf114	-1.029533854	4.71E-07
ENSG00000204566	C10orf115	0.231510169	1
ENSG00000148671	C10orf116	0.891378904	1.00E-08
ENSG00000165813	C10orf118	-0.099557336	1
ENSG00000155640	C10orf12	0.181126411	0.673381029
ENSG00000183559	C10orf120	1.968408083	1
ENSG00000204365	C10orf126	-0.665226983	1
ENSG00000204161	C10orf128	-3.065780426	0.839452475
ENSG00000173124	C10orf129	0.441308092	1
ENSG00000173088	C10orf131	0.741950273	4.78E-08
ENSG00000107938	C10orf137	0.60359774	3.04E-05
ENSG00000107815	C10orf2	1.002539639	3.87E-20
ENSG00000165511	C10orf25	-0.102871095	1
ENSG00000166275	C10orf32	0.258852696	0.881088702
ENSG00000171224	C10orf35	-0.588057408	0.001504441
ENSG00000235931	C10orf40	0	1
ENSG00000178645	C10orf53	0.311916683	1
ENSG00000107738	C10orf54	-1.790042574	1
ENSG00000222047	C10orf55	-0.854066774	4.71E-14
ENSG00000203942	C10orf62	0	1
ENSG00000179133	C10orf67	-0.301532063	1
ENSG00000150076	C10orf68	-0.766137307	0.069467223
ENSG00000177354	C10orf71	-1.789943949	1
ENSG00000236208	C10orf71-AS1	0	1
ENSG00000120029	C10orf76	0.111914686	1
ENSG00000165863	C10orf82	2.77133639	1
ENSG00000177234	C10orf85	-3.066230809	0.839452475
ENSG00000119965	C10orf88	0.370997616	0.420820305
ENSG00000154493	C10orf90	0.531689364	0.871228395
ENSG00000180066	C10orf91	0.124546393	1
ENSG00000120055	C10orf95	0.768703066	0.126047587
ENSG00000188373	C10orf99	0.720094193	1
ENSG00000137720	C11orf1	-0.015229165	1
ENSG00000176029	C11orf16	-0.16341443	1
ENSG00000110665	C11orf21	0	1
ENSG00000171067	C11orf24	0.330910674	0.010528834
ENSG00000158636	C11orf30	0.277589603	0.101138314
ENSG00000211450	C11orf31	-0.301697646	0.045073668
ENSG00000188771	C11orf34	0.218292416	1
ENSG00000185522	C11orf35	-0.922060299	0.150125946
ENSG00000171987	C11orf40	0	1
ENSG00000180878	C11orf42	0.451281322	1
ENSG00000175728	C11orf44	-1.082453024	0.333043958
ENSG00000174370	C11orf45	-1.109805304	1.74E-08
ENSG00000162194	C11orf48	-0.298611357	0.043157726
ENSG00000149179	C11orf49	-0.021683809	1
ENSG00000149300	C11orf52	0.217842033	1
ENSG00000150750	C11orf53	-2.56466507	1
ENSG00000182919	C11orf54	-0.042861763	1
ENSG00000150776	C11orf57	0.620692571	4.72E-07
ENSG00000110696	C11orf58	-0.045522354	1
ENSG00000109944	C11orf63	-0.169134365	1
ENSG00000166323	C11orf65	-0.173206086	0.975620425
ENSG00000175573	C11orf68	-0.345661671	0.006863399
ENSG00000137691	C11orf70	0.595885041	0.748493737
ENSG00000180425	C11orf71	-0.632162783	0.292550267
ENSG00000184224	C11orf72	0.980803646	1
ENSG00000149196	C11orf73	-0.216457493	0.732603758
ENSG00000166352	C11orf74	-0.459424726	0.073049102
ENSG00000166002	C11orf75	-0.118604118	0.986501618
ENSG00000173715	C11orf80	-0.133120613	0.911566954
ENSG00000165490	C11orf82	0.100001437	1
ENSG00000204922	C11orf83	-0.073408775	1
ENSG00000168005	C11orf84	-0.037714099	1
ENSG00000168070	C11orf85	0.515190361	1
ENSG00000173237	C11orf86	-0.960627771	1
ENSG00000185742	C11orf87	-1.790494539	1
ENSG00000183644	C11orf88	-0.05659929	1
ENSG00000184682	C11orf89	-1.789943949	1
ENSG00000205177	C11orf91	-1.598016951	0.688581822
ENSG00000196167	C11orf92	-0.692473655	1
ENSG00000214290	C11orf93	1.181018285	0.521224271
ENSG00000234776	C11orf94	1.001986656	0.300145573
ENSG00000188070	C11orf95	0.11851459	0.945899242
ENSG00000187479	C11orf96	0.764003237	0.46189204
ENSG00000139637	C12orf10	0.150600046	0.625967064
ENSG00000151135	C12orf23	-0.106571246	1
ENSG00000133641	C12orf29	0.837233585	2.94E-06
ENSG00000180861	C12orf36	0.980351682	1
ENSG00000134548	C12orf39	0.477651976	0.382109003
ENSG00000047621	C12orf4	0.293113239	0.178998749
ENSG00000180116	C12orf40	0.123989363	1
ENSG00000179088	C12orf42	0.018055749	1
ENSG00000157895	C12orf43	0.436430576	0.005215229
ENSG00000123395	C12orf44	0.763023196	3.75E-12
ENSG00000151131	C12orf45	0.523894815	0.00221788
ENSG00000111412	C12orf49	0.02160128	1
ENSG00000078237	C12orf5	-0.05490888	1
ENSG00000165805	C12orf50	-1.094983345	0.151272525
ENSG00000139405	C12orf52	0.31999001	0.031084466
ENSG00000177627	C12orf54	0.021356234	1
ENSG00000188596	C12orf55	0.247865874	1
ENSG00000185306	C12orf56	0.325676891	0.317554625
ENSG00000111678	C12orf57	-0.385478983	0.003558596
ENSG00000182993	C12orf60	-0.095476661	1
ENSG00000221949	C12orf61	-1.76434775	0.783919238
ENSG00000130921	C12orf65	-0.141913016	0.935750123
ENSG00000174206	C12orf66	0.392344003	0.193486644
ENSG00000177875	C12orf68	-0.110656707	1
ENSG00000179256	C12orf69	0.223504679	1
ENSG00000165935	C12orf70	-0.066559563	1
ENSG00000214700	C12orf71	2.771188826	1
ENSG00000204954	C12orf73	0.654073674	0.005379175
ENSG00000214215	C12orf74	0	1
ENSG00000235162	C12orf75	-0.507203726	0.000801099
ENSG00000174456	C12orf76	-0.021831698	1
ENSG00000226397	C12orf77	-0.596600311	1
ENSG00000197595	C13orf35	0.604060517	1
ENSG00000178734	C13orf45	0	1
ENSG00000133935	C14orf1	-1.256443515	1.44E-20
ENSG00000070269	C14orf101	0.000509019	1
ENSG00000100557	C14orf105	-1.75446269	0.013220061
ENSG00000179933	C14orf119	-0.11871545	0.963239467
ENSG00000227051	C14orf132	-1.53323947	1.81E-10
ENSG00000170270	C14orf142	0.833417413	0.002680238
ENSG00000228032	C14orf144	1.968408083	1
ENSG00000133943	C14orf159	-0.13965333	1
ENSG00000215277	C14orf164	-0.362391303	0.871228395
ENSG00000087302	C14orf166	-0.09098239	1
ENSG00000100565	C14orf166B	1.069008767	0.594723711
ENSG00000255242	C14orf169	0.079726124	1
ENSG00000176605	C14orf177	1.968408083	1
ENSG00000197734	C14orf178	-0.019063227	1
ENSG00000184601	C14orf180	0	1
ENSG00000214900	C14orf182	-1.367976005	0.000580386
ENSG00000168260	C14orf183	0.571803174	1
ENSG00000156411	C14orf2	0.049600599	1
ENSG00000186960	C14orf23	1.113333252	0.440260097
ENSG00000179476	C14orf28	-0.920464914	0.24410566
ENSG00000139971	C14orf37	-0.128422187	0.684712996
ENSG00000179008	C14orf39	0.055520601	1
ENSG00000246223	C14orf64	-0.11121974	1
ENSG00000140104	C14orf79	0.454215054	0.039036865
ENSG00000185347	C14orf80	-0.878963758	3.54E-05
ENSG00000100802	C14orf93	-0.715652007	0.001893598
ENSG00000156206	C15orf26	-0.476974203	0.269367384
ENSG00000169758	C15orf27	-0.013538246	1
ENSG00000183643	C15orf32	3.282899877	0.839452475
ENSG00000259642	C15orf37	0.038674516	1
ENSG00000242498	C15orf38	-0.807454189	8.09E-08
ENSG00000250021	C15orf38-AP3S2	-0.377178769	0.004031082
ENSG00000167173	C15orf39	0.695753431	3.88E-11
ENSG00000169609	C15orf40	0.213082489	0.409256543
ENSG00000186073	C15orf41	0.085593123	1
ENSG00000167014	C15orf43	-0.624075294	1
ENSG00000166920	C15orf48	-0.237773664	1
ENSG00000188549	C15orf52	-0.749380345	1.84E-12
ENSG00000175779	C15orf53	0	1
ENSG00000175746	C15orf54	0	1
ENSG00000184507	C15orf55	0.414704351	1
ENSG00000176753	C15orf56	0	1
ENSG00000128891	C15orf57	0.675496571	4.55E-05
ENSG00000205363	C15orf59	0.028814383	1
ENSG00000183324	C15orf60	0.782885008	0.467695643
ENSG00000189227	C15orf61	0.103636318	1
ENSG00000188277	C15orf62	-0.019894346	1
ENSG00000161992	C16orf11	2.168526408	0.783919238
ENSG00000130731	C16orf13	0.135480536	0.961825404
ENSG00000221819	C16orf3	4.603700892	0.034761032
ENSG00000166780	C16orf45	-0.380657836	0.014245463
ENSG00000166455	C16orf46	0.667221575	0.009748811
ENSG00000197445	C16orf47	-0.294934206	1
ENSG00000185716	C16orf52	0.077386723	1
ENSG00000185905	C16orf54	1.968408083	1
ENSG00000167523	C16orf55	0.015554588	1
ENSG00000140688	C16orf58	-0.510101696	8.65E-05
ENSG00000162062	C16orf59	-0.437829815	0.017053733
ENSG00000103544	C16orf62	-0.172917478	0.509631922
ENSG00000125149	C16orf70	0.429952451	0.002222401
ENSG00000166246	C16orf71	0.883653074	0.247892625
ENSG00000182831	C16orf72	-0.076633765	1
ENSG00000154102	C16orf74	-0.887956811	0.020005512
ENSG00000166152	C16orf78	-0.294894418	1
ENSG00000070761	C16orf80	0.460885447	0.000469479
ENSG00000234186	C16orf82	0	1
ENSG00000159761	C16orf86	-0.824159038	0.922847702
ENSG00000155330	C16orf87	1.07713552	2.50E-06
ENSG00000103550	C16orf88	-0.199308178	0.483369914
ENSG00000153446	C16orf89	0.162515695	1
ENSG00000215131	C16orf90	-3.065878638	0.839452475
ENSG00000174109	C16orf91	0.663672954	2.33E-05
ENSG00000167194	C16orf92	0.193839879	1
ENSG00000196118	C16orf93	0.168503091	1
ENSG00000260456	C16orf95	-0.237910759	0.793340407
ENSG00000205832	C16orf96	-0.110394637	1
ENSG00000261190	C16orf97	-0.315246393	1
ENSG00000261359	C16orf98	1.180471646	0.521224271
ENSG00000212734	C17orf100	0.804322018	0.011100565
ENSG00000197322	C17orf102	1.352896462	1
ENSG00000154035	C17orf103	0.605477389	0.084342991
ENSG00000180336	C17orf104	0.135490848	0.876389761
ENSG00000231256	C17orf105	0.224882	1
ENSG00000205710	C17orf107	0.684162751	0.559446927
ENSG00000227011	C17orf112	0	1
ENSG00000181013	C17orf47	-2.564566651	1
ENSG00000258315	C17orf49	-0.20718753	0.579045619
ENSG00000154768	C17orf50	0.17757022	1
ENSG00000212719	C17orf51	0.727712743	2.32E-11
ENSG00000125319	C17orf53	0.373292129	0.024785443
ENSG00000186665	C17orf58	0.165300596	0.997444214
ENSG00000196544	C17orf59	0.783016724	0.018941198
ENSG00000178927	C17orf62	-0.649508198	1.84E-08
ENSG00000141371	C17orf64	0.8944352	0.670047747
ENSG00000172653	C17orf66	0.695566567	0.123692102
ENSG00000214226	C17orf67	0.108527493	1
ENSG00000185504	C17orf70	-0.057336612	1
ENSG00000224383	C17orf72	-0.417934963	1
ENSG00000184560	C17orf74	-1.552056163	0.024363318
ENSG00000108666	C17orf75	-0.084826799	1
ENSG00000175061	C17orf76-AS1	-0.250243287	0.057892331
ENSG00000182352	C17orf77	-3.437453706	0.530426505
ENSG00000167230	C17orf78	0.230822576	1
ENSG00000141219	C17orf80	0.21552531	0.246438647
ENSG00000187013	C17orf82	-0.871586222	1
ENSG00000074356	C17orf85	0.152777183	0.73995599
ENSG00000224877	C17orf89	0.015408682	1
ENSG00000179294	C17orf96	0.946246576	1.31E-10
ENSG00000187624	C17orf97	-0.360769613	1
ENSG00000214556	C17orf98	0.869056922	1
ENSG00000187997	C17orf99	-0.00053344	1
ENSG00000141428	C18orf21	0.689648721	0.006346729
ENSG00000152242	C18orf25	0.288548726	0.155091084
ENSG00000177576	C18orf32	-0.646798028	0.030969342
ENSG00000231824	C18orf42	0.71835772	1
ENSG00000166845	C18orf54	-0.612049442	0.00066384
ENSG00000176912	C18orf56	-0.537033313	7.15E-05
ENSG00000206026	C18orf62	0.594130167	1
ENSG00000206043	C18orf63	0.233461076	1
ENSG00000141452	C18orf8	0.509187951	0.000549913
ENSG00000074842	C19orf10	-0.229373749	0.121593274
ENSG00000131943	C19orf12	-0.116013484	0.957023706
ENSG00000177025	C19orf18	0.893995983	1
ENSG00000099812	C19orf21	-1.553863673	8.87E-23
ENSG00000228300	C19orf24	0.276041481	0.234410046
ENSG00000119559	C19orf25	-0.087532876	1
ENSG00000099625	C19orf26	0.495344394	0.009822438
ENSG00000167644	C19orf33	-1.458970995	3.67E-12
ENSG00000188305	C19orf35	0.206720586	1
ENSG00000214212	C19orf38	0.550507142	0.251738817
ENSG00000131944	C19orf40	-0.738312986	0.050802011
ENSG00000123144	C19orf43	-0.003343078	1
ENSG00000105072	C19orf44	0.41432643	0.000937531
ENSG00000198723	C19orf45	0.572121362	1
ENSG00000160392	C19orf47	0.239892333	0.362678375
ENSG00000167747	C19orf48	0.345652662	0.003921488
ENSG00000142444	C19orf52	0.441075702	0.046304465
ENSG00000104979	C19orf53	0.023859725	1
ENSG00000188493	C19orf54	0.062376379	1
ENSG00000167595	C19orf55	-0.645767571	0.000507745
ENSG00000132016	C19orf57	-0.350888402	0.206377753
ENSG00000183019	C19orf59	1.853249311	0.688581822
ENSG00000006015	C19orf60	-0.777183112	5.64E-05
ENSG00000130813	C19orf66	-1.323045995	1.32E-11
ENSG00000188032	C19orf67	0.17885654	1
ENSG00000185453	C19orf68	-0.257780921	0.482331482
ENSG00000204978	C19orf69	0	1
ENSG00000174917	C19orf70	-0.036990261	1
ENSG00000183397	C19orf71	-0.423126817	0.02800132
ENSG00000221916	C19orf73	-1.213251211	0.440260097
ENSG00000095932	C19orf77	0.718505258	1
ENSG00000130173	C19orf80	0.628208855	0.126070064
ENSG00000235034	C19orf81	-0.445195385	0.912486332
ENSG00000197223	C1D	0.134055066	1
ENSG00000231245	C1DP1	0.106657341	1
ENSG00000236217	C1DP2	-0.289100857	1
ENSG00000224760	C1DP3	1.09668425	1
ENSG00000227515	C1DP4	-1.082821624	0.594723711
ENSG00000106392	C1GALT1	0.109672907	1
ENSG00000171155	C1GALT1C1	-0.707210619	0.001930829
ENSG00000173728	C1orf100	1.305029361	0.330979116
ENSG00000179397	C1orf101	-0.572473473	0.871228395
ENSG00000180999	C1orf105	-0.18515049	0.629209849
ENSG00000163362	C1orf106	-0.607836004	0.001793616
ENSG00000116922	C1orf109	0.733027136	1.69E-09
ENSG00000185860	C1orf110	-1.467810997	1
ENSG00000171722	C1orf111	-2.21819209	0.349636506
ENSG00000000460	C1orf112	-0.037495402	1
ENSG00000117477	C1orf114	1.827952288	1.08E-21
ENSG00000162817	C1orf115	2.770503696	1
ENSG00000182795	C1orf116	0.239558571	1
ENSG00000197982	C1orf122	0.314156787	0.065109011
ENSG00000162384	C1orf123	-0.466640647	0.016606273
ENSG00000175262	C1orf127	0.350771911	1
ENSG00000143633	C1orf131	0.580038346	0.008961567
ENSG00000203709	C1orf132	-0.316590857	1
ENSG00000204377	C1orf134	-1.27027179	0.521224271
ENSG00000203864	C1orf137	2.771679111	1
ENSG00000203804	C1orf138	0.980902271	1
ENSG00000203963	C1orf141	-0.720801106	1
ENSG00000228208	C1orf143	-0.332660233	1
ENSG00000162913	C1orf145	-0.678594232	0.142860221
ENSG00000203910	C1orf146	-0.181009917	0.675300346
ENSG00000162888	C1orf147	-0.289766791	0.541708193
ENSG00000203684	C1orf148	0.595129344	1
ENSG00000157330	C1orf158	-1.789943949	1
ENSG00000131591	C1orf159	0.302957955	0.107794211
ENSG00000143110	C1orf162	0.807041285	0.126047587
ENSG00000215910	C1orf167	-0.675643746	0.002456035
ENSG00000187889	C1orf168	-0.596501893	1
ENSG00000187642	C1orf170	-0.636579388	0.532376554
ENSG00000175707	C1orf172	0.231621405	1
ENSG00000178965	C1orf173	-0.694209501	1
ENSG00000198912	C1orf174	0.003675951	1
ENSG00000162398	C1orf177	0.218390621	1
ENSG00000180869	C1orf180	-0.59666847	1
ENSG00000204006	C1orf185	0.580949319	1
ENSG00000196533	C1orf186	-0.07546989	1
ENSG00000163263	C1orf189	0.47528495	1
ENSG00000198711	C1orf191	0.595058306	1
ENSG00000188931	C1orf192	-0.471959334	0.54610378
ENSG00000179902	C1orf194	-2.565017808	1
ENSG00000204464	C1orf195	3.284072842	0.839452475
ENSG00000119280	C1orf198	-0.69387231	2.25E-07
ENSG00000179840	C1orf200	0	1
ENSG00000188004	C1orf204	-1.353352557	0.052410004
ENSG00000116667	C1orf21	-0.521855179	0.038215934
ENSG00000253313	C1orf210	0	1
ENSG00000249087	C1orf213	0.111804863	1
ENSG00000142686	C1orf216	0.149616102	0.636838773
ENSG00000213057	C1orf220	-1.002412843	0.059764533
ENSG00000142609	C1orf222	-0.4593954	0.766038248
ENSG00000239887	C1orf226	0.130924813	1
ENSG00000185523	C1orf227	0.442118591	1
ENSG00000198520	C1orf228	-0.036764486	1
ENSG00000221953	C1orf229	-3.732404709	0.320796081
ENSG00000228594	C1orf233	-0.070049862	1
ENSG00000157181	C1orf27	0.361158366	0.072181644
ENSG00000143793	C1orf35	-0.001895624	1
ENSG00000143612	C1orf43	0.044042314	1
ENSG00000164008	C1orf50	0.547010202	0.004481187
ENSG00000159208	C1orf51	-0.328120487	1
ENSG00000162642	C1orf52	0.754769627	1.57E-07
ENSG00000203724	C1orf53	-0.256394243	1
ENSG00000118292	C1orf54	-0.227220252	0.755642866
ENSG00000143443	C1orf56	0.176391338	0.607584923
ENSG00000125462	C1orf61	1.72506907	3.42E-32
ENSG00000117616	C1orf63	0.085772288	1
ENSG00000183888	C1orf64	0	1
ENSG00000178395	C1orf65	0.218124948	1
ENSG00000198854	C1orf68	0	1
ENSG00000162757	C1orf74	-0.268881203	1
ENSG00000198715	C1orf85	0.690669772	0.040780392
ENSG00000162585	C1orf86	0.123579314	0.882673439
ENSG00000162598	C1orf87	0.980841852	1
ENSG00000142698	C1orf94	-0.439461295	0.630581358
ENSG00000203685	C1orf95	0.893811064	1
ENSG00000173372	C1QA	0	1
ENSG00000173369	C1QB	-1.790042574	1
ENSG00000108561	C1QBP	0.36182086	0.001395934
ENSG00000215353	C1QBPP	0.176595634	1
ENSG00000159189	C1QC	0	1
ENSG00000131094	C1QL1	-0.06189629	1
ENSG00000144119	C1QL2	2.974599416	0.140549516
ENSG00000165985	C1QL3	0.772378547	1
ENSG00000186897	C1QL4	-0.334876923	0.247892625
ENSG00000173918	C1QTNF1	-0.38981967	0.700162475
ENSG00000145861	C1QTNF2	-2.290922153	2.72E-10
ENSG00000082196	C1QTNF3	-0.941508668	6.71E-06
ENSG00000172247	C1QTNF4	1.870965821	1
ENSG00000223953	C1QTNF5	0	1
ENSG00000133466	C1QTNF6	-1.567225774	2.19E-19
ENSG00000163145	C1QTNF7	0.177913544	1
ENSG00000184471	C1QTNF8	0	1
ENSG00000240654	C1QTNF9	1.912824753	0.025434228
ENSG00000240868	C1QTNF9-AS1	2.674486765	0.003194601
ENSG00000205863	C1QTNF9B	1.831431382	0.000546036
ENSG00000205861	C1QTNF9B-AS1	1.388012126	6.51E-06
ENSG00000159403	C1R	-1.182909949	3.59E-12
ENSG00000139178	C1RL	-1.241644518	2.99E-20
ENSG00000205885	C1RL-AS1	-0.268136194	0.33094204
ENSG00000182326	C1S	-0.579942277	0.000107047
ENSG00000166278	C2	-0.558813425	0.003543281
ENSG00000204364	C2	0	1
ENSG00000206372	C2	0	1
ENSG00000226560	C2	0	1
ENSG00000231543	C2	0	1
ENSG00000235017	C2	0	1
ENSG00000235696	C2	0	1
ENSG00000132823	C20orf111	0.499997179	0.000389936
ENSG00000197183	C20orf112	-0.300890087	0.041586399
ENSG00000101342	C20orf118	0.010590909	1
ENSG00000258713	C20orf141	-0.596060157	1
ENSG00000149609	C20orf144	-0.729199506	0.970311513
ENSG00000174407	C20orf166	0	1
ENSG00000174403	C20orf166-AS1	0.476514421	1
ENSG00000125975	C20orf173	0	1
ENSG00000125899	C20orf187	0.177913544	1
ENSG00000088854	C20orf194	-0.046423912	1
ENSG00000125531	C20orf195	0	1
ENSG00000171984	C20orf196	-0.152443039	1
ENSG00000176659	C20orf197	-1.097519262	1
ENSG00000171695	C20orf201	-1.790494539	1
ENSG00000215595	C20orf202	2.77133639	1
ENSG00000198547	C20orf203	0.205485888	1
ENSG00000101084	C20orf24	0.211680167	0.213184258
ENSG00000089101	C20orf26	0.505681615	0.705542457
ENSG00000101220	C20orf27	0.060248085	1
ENSG00000168746	C20orf62	-0.66616685	1
ENSG00000149443	C20orf78	-0.597159502	1
ENSG00000124237	C20orf85	-1.789943949	1
ENSG00000196476	C20orf96	-0.016621867	1
ENSG00000256073	C21orf119	-0.06665217	1
ENSG00000184385	C21orf128	1.968064759	1
ENSG00000160226	C21orf2	-0.351647051	0.092878686
ENSG00000160221	C21orf33	-0.386347148	0.008084599
ENSG00000232560	C21orf37	-1.790042574	1
ENSG00000205930	C21orf49	0.246891126	1
ENSG00000229086	C21orf54	1.968064759	1
ENSG00000160298	C21orf58	-1.07119225	1.73E-10
ENSG00000159079	C21orf59	0.61186464	3.42E-06
ENSG00000205929	C21orf62	0.685798982	1
ENSG00000183250	C21orf67	-0.778997711	0.001616007
ENSG00000156265	C21orf7	-0.140272032	1
ENSG00000184809	C21orf88	-0.642999426	0.80919972
ENSG00000182912	C21orf90	0.440226437	1
ENSG00000154642	C21orf91	0.355748441	0.109300318
ENSG00000240770	C21orf91-OT1	0.243993105	0.872714265
ENSG00000169314	C22orf15	-3.06568222	0.839452475
ENSG00000128346	C22orf23	-0.106122667	1
ENSG00000128254	C22orf24	-0.276508047	0.359853093
ENSG00000182257	C22orf26	-0.419155566	1
ENSG00000100220	C22orf28	0.285971443	0.025589603
ENSG00000215012	C22orf29	-0.045512732	1
ENSG00000100249	C22orf31	0	1
ENSG00000183172	C22orf32	-0.096079142	0.985838057
ENSG00000188511	C22orf34	0.664517541	3.04E-06
ENSG00000242259	C22orf39	0.288494124	0.018000105
ENSG00000205856	C22orf42	0.615227136	1
ENSG00000189269	C22orf43	-0.166067293	1
ENSG00000184208	C22orf46	-0.52225899	2.29E-05
ENSG00000157617	C2CD2	0.264342356	0.345043141
ENSG00000172375	C2CD2L	1.040269741	2.15E-12
ENSG00000168014	C2CD3	-0.068926147	1
ENSG00000198535	C2CD4A	0.177913544	1
ENSG00000205502	C2CD4B	0	1
ENSG00000183186	C2CD4C	-0.725358853	0.000269298
ENSG00000225556	C2CD4D	3.660421313	0.530426505
ENSG00000111731	C2CD5	-0.711065949	4.87E-06
ENSG00000241962	C2orf15	0.060290015	1
ENSG00000221843	C2orf16	-0.566834697	0.982476131
ENSG00000197927	C2orf27A	0.320003478	0.031117489
ENSG00000186825	C2orf27B	-0.643758473	0.666905416
ENSG00000119147	C2orf40	-3.732404709	0.320796081
ENSG00000115998	C2orf42	-0.293134802	0.06470233
ENSG00000118961	C2orf43	0.139766024	1
ENSG00000163026	C2orf44	0.472731324	0.000882917
ENSG00000162972	C2orf47	0.315305751	0.102569582
ENSG00000163009	C2orf48	0.126761747	0.970311513
ENSG00000135974	C2orf49	0.444452631	0.007840387
ENSG00000150873	C2orf50	0.229199315	1
ENSG00000186143	C2orf53	0	1
ENSG00000172478	C2orf54	-1.790042574	1
ENSG00000177673	C2orf57	0	1
ENSG00000239605	C2orf61	0.137884947	1
ENSG00000158428	C2orf62	-0.017604987	1
ENSG00000187944	C2orf66	1.968064759	1
ENSG00000168887	C2orf68	-0.541768668	0.000523472
ENSG00000178074	C2orf69	0.13182624	0.839452475
ENSG00000173557	C2orf70	1.356215425	8.94E-13
ENSG00000179270	C2orf71	0	1
ENSG00000204128	C2orf72	-1.146703065	0.03417891
ENSG00000177994	C2orf73	-0.961215883	1
ENSG00000237651	C2orf74	-0.559244389	0.022702151
ENSG00000186132	C2orf76	-0.183692106	1
ENSG00000187833	C2orf78	-0.161371959	1
ENSG00000188674	C2orf80	0.789255056	0.954120814
ENSG00000159239	C2orf81	-0.026949909	1
ENSG00000182600	C2orf82	0.189781196	1
ENSG00000042304	C2orf83	0.892888374	1
ENSG00000187699	C2orf88	-0.090404589	1
ENSG00000205086	C2orf91	0.719544624	1
ENSG00000125730	C3	0.031947812	1
ENSG00000171860	C3AR1	-0.391444489	1
ENSG00000114405	C3orf14	1.968408083	1
ENSG00000163608	C3orf17	0.122970542	0.881784492
ENSG00000088543	C3orf18	-0.862589918	1.69E-06
ENSG00000131379	C3orf20	-0.224906799	0.699337203
ENSG00000180697	C3orf22	-0.153830614	1
ENSG00000198685	C3orf27	0.178464133	1
ENSG00000163424	C3orf30	0.17885654	1
ENSG00000174928	C3orf33	0.725672605	0.107886643
ENSG00000198590	C3orf35	0.39884867	1
ENSG00000221972	C3orf36	0	1
ENSG00000183624	C3orf37	-0.121088566	0.89368956
ENSG00000179021	C3orf38	0.064482617	1
ENSG00000214097	C3orf43	-3.437355675	0.530426505
ENSG00000179564	C3orf45	0.098772472	1
ENSG00000163632	C3orf49	-0.053531606	1
ENSG00000114529	C3orf52	0.050069191	1
ENSG00000174899	C3orf55	0.869537453	1
ENSG00000214324	C3orf56	0	1
ENSG00000181744	C3orf58	-0.033764522	1
ENSG00000188315	C3orf62	0.324701907	0.408118245
ENSG00000163915	C3orf65	1.493540841	1
ENSG00000163689	C3orf67	-0.657512738	0.003990941
ENSG00000187068	C3orf70	-0.242988463	1
ENSG00000206262	C3orf72	0.398251881	1
ENSG00000237787	C3orf79	-1.789943949	1
ENSG00000180044	C3orf80	1.385325393	0.034184742
ENSG00000225526	C3orf83	0.084808456	1
ENSG00000167798	C3P1	-0.40788206	1
ENSG00000206340	C4A	0	1
ENSG00000227746	C4A	0	1
ENSG00000244207	C4A	0	1
ENSG00000244731	C4A	0.181107769	1
ENSG00000225540	C4A-AS1	0	1
ENSG00000230075	C4A-AS1	0	1
ENSG00000232565	C4A-AS1	0	1
ENSG00000233627	C4A-AS1	1.034463442	0.688581822
ENSG00000238170	C4A-AS1	0	1
ENSG00000224389	C4B	-0.485107932	0.926093203
ENSG00000224639	C4B	0	1
ENSG00000228267	C4B	0	1
ENSG00000236625	C4B	0	1
ENSG00000233312	C4B_2	0	1
ENSG00000223661	C4B-AS1	0	1
ENSG00000223747	C4B-AS1	0	1
ENSG00000225773	C4B-AS1	0	1
ENSG00000227884	C4B-AS1	0	1
ENSG00000229776	C4B-AS1	-0.468108374	1
ENSG00000233692	C4B-AS1	0	1
ENSG00000235250	C4B-AS1	0	1
ENSG00000123838	C4BPA	2.418232967	0.530426505
ENSG00000224462	C4BPAP1	-0.152891274	1
ENSG00000232621	C4BPAP2	0	1
ENSG00000123843	C4BPB	1.968064759	1
ENSG00000138813	C4orf17	-1.789943949	1
ENSG00000154274	C4orf19	0.112510607	1
ENSG00000138658	C4orf21	-0.308727391	0.094528668
ENSG00000197826	C4orf22	0.214576656	1
ENSG00000174792	C4orf26	-2.061218262	0.006960357
ENSG00000056050	C4orf27	-0.566326177	0.009633338
ENSG00000164074	C4orf29	0.057760443	1
ENSG00000164096	C4orf3	-0.607791951	2.04E-05
ENSG00000174749	C4orf32	0.925432041	9.04E-12
ENSG00000151470	C4orf33	-0.898801314	0.006756221
ENSG00000163633	C4orf36	-0.285370312	0.119125965
ENSG00000187533	C4orf40	2.77084622	1
ENSG00000164123	C4orf45	-0.302833388	0.291031243
ENSG00000205208	C4orf46	-0.126721238	1
ENSG00000205129	C4orf47	0.932890509	0.463507762
ENSG00000243449	C4orf48	-0.46454958	0.115793544
ENSG00000181215	C4orf50	0.980902271	1
ENSG00000237136	C4orf51	-0.314484029	0.191630775
ENSG00000250317	C4orf52	-0.068258094	1
ENSG00000082929	C4orf6	0	1
ENSG00000106804	C5	0.242734038	1
ENSG00000197405	C5AR1	-0.138800529	1
ENSG00000134830	C5AR2	-1.085567828	1
ENSG00000113583	C5orf15	-0.459331902	0.000734438
ENSG00000248874	C5orf17	0.149359181	1
ENSG00000251380	C5orf20	0	1
ENSG00000082213	C5orf22	0.260462772	0.17549871
ENSG00000181904	C5orf24	-0.322532612	0.044924816
ENSG00000236882	C5orf27	-0.448136221	1
ENSG00000151881	C5orf28	0.644595863	0.00092413
ENSG00000181751	C5orf30	0.372804264	0.056474877
ENSG00000172244	C5orf34	-0.2874056	0.015932089
ENSG00000186493	C5orf38	0	1
ENSG00000170271	C5orf4	0.338377448	0.649191611
ENSG00000197603	C5orf42	-0.647072207	1.62E-05
ENSG00000161010	C5orf45	-0.239656647	0.071522824
ENSG00000178776	C5orf46	-0.334852471	1
ENSG00000185056	C5orf47	-0.295041983	1
ENSG00000196900	C5orf48	3.660762331	0.530426505
ENSG00000215217	C5orf49	0	1
ENSG00000185662	C5orf50	0	1
ENSG00000205765	C5orf51	0.229293419	0.213628129
ENSG00000187658	C5orf52	1.493199032	1
ENSG00000221886	C5orf54	-1.420394997	0.000520622
ENSG00000221990	C5orf55	0.156113033	1
ENSG00000197536	C5orf56	-0.003962069	1
ENSG00000234511	C5orf58	0.224246807	1
ENSG00000204661	C5orf60	-1.789943949	1
ENSG00000164241	C5orf63	-0.144321948	1
ENSG00000178722	C5orf64	0.473635555	1
ENSG00000039537	C6	-0.470346108	1
ENSG00000186577	C6orf1	-0.687594518	0.003132446
ENSG00000204296	C6orf10	-0.064746744	1
ENSG00000206245	C6orf10	0	1
ENSG00000206310	C6orf10	0	1
ENSG00000226892	C6orf10	0	1
ENSG00000232106	C6orf10	0	1
ENSG00000234280	C6orf10	0	1
ENSG00000236672	C6orf10	0	1
ENSG00000237881	C6orf10	0	1
ENSG00000204709	C6orf100	0	1
ENSG00000206526	C6orf100	0	1
ENSG00000231041	C6orf100	0	1
ENSG00000233566	C6orf100	0	1
ENSG00000237313	C6orf100	0	1
ENSG00000237634	C6orf100	0	1
ENSG00000196821	C6orf106	-0.058745223	1
ENSG00000112539	C6orf118	1.116044872	0.006947669
ENSG00000185127	C6orf120	0.10660165	1
ENSG00000146521	C6orf123	2.771679111	1
ENSG00000188112	C6orf132	-1.11450017	0.001508099
ENSG00000204564	C6orf136	-0.007610601	1
ENSG00000206487	C6orf136	0	1
ENSG00000224120	C6orf136	0	1
ENSG00000233164	C6orf136	0	1
ENSG00000233641	C6orf136	0	1
ENSG00000237012	C6orf136	0	1
ENSG00000237100	C6orf136	0	1
ENSG00000197261	C6orf141	-0.294444036	1
ENSG00000204542	C6orf15	-1.789943949	1
ENSG00000206461	C6orf15	0	1
ENSG00000224105	C6orf15	0	1
ENSG00000225543	C6orf15	0	1
ENSG00000229432	C6orf15	0	1
ENSG00000231624	C6orf15	0	1
ENSG00000203872	C6orf163	0.238873435	1
ENSG00000203871	C6orf164	0.893811064	1
ENSG00000213204	C6orf165	-0.001245326	1
ENSG00000146350	C6orf170	0.117352688	1
ENSG00000243587	C6orf183	-0.296507311	1
ENSG00000164385	C6orf195	-0.461721341	0.890016094
ENSG00000185689	C6orf201	-0.02810485	1
ENSG00000130349	C6orf203	-0.653341623	0.04531082
ENSG00000146476	C6orf211	-0.287027776	0.23998788
ENSG00000189325	C6orf222	0.980461122	1
ENSG00000181577	C6orf223	0.67806931	1
ENSG00000221821	C6orf226	-1.085512095	0.0011747
ENSG00000204420	C6orf25	-0.003920619	1
ENSG00000206396	C6orf25	0	1
ENSG00000224393	C6orf25	0	1
ENSG00000228090	C6orf25	0	1
ENSG00000230060	C6orf25	0	1
ENSG00000231003	C6orf25	0	1
ENSG00000237459	C6orf25	0	1
ENSG00000203623	C6orf47	0	1
ENSG00000204439	C6orf47	-0.382056546	0.105000787
ENSG00000226103	C6orf47	0	1
ENSG00000226531	C6orf47	0	1
ENSG00000228177	C6orf47	0	1
ENSG00000228435	C6orf47	0	1
ENSG00000235360	C6orf47	0	1
ENSG00000224835	C6orf47-AS1	0	1
ENSG00000225390	C6orf47-AS1	0	1
ENSG00000227198	C6orf47-AS1	-0.402314865	0.07988676
ENSG00000227665	C6orf47-AS1	0	1
ENSG00000227853	C6orf47-AS1	0	1
ENSG00000233169	C6orf47-AS1	0	1
ENSG00000235516	C6orf47-AS1	0	1
ENSG00000204387	C6orf48	0.492701236	0.000120422
ENSG00000206380	C6orf48	0	1
ENSG00000226710	C6orf48	0	1
ENSG00000229300	C6orf48	0	1
ENSG00000234728	C6orf48	0	1
ENSG00000137434	C6orf52	0.107985733	1
ENSG00000154079	C6orf57	-0.501025001	1
ENSG00000184530	C6orf58	-0.692082449	1
ENSG00000112308	C6orf62	-0.408069054	0.00152393
ENSG00000130023	C6orf70	-0.579045469	0.057372102
ENSG00000198663	C6orf89	-0.321073315	0.032466496
ENSG00000203711	C6orf99	-1.012708756	0.463507762
ENSG00000112936	C7	0.062792354	1
ENSG00000175600	C7orf10	0.046229664	1
ENSG00000244291	C7orf13	0	1
ENSG00000136197	C7orf25	-0.536365306	0.037706777
ENSG00000146576	C7orf26	0.205120547	0.294265413
ENSG00000188707	C7orf29	0	1
ENSG00000153790	C7orf31	-0.555611953	0.119441502
ENSG00000170279	C7orf33	0.224236437	1
ENSG00000165131	C7orf34	0	1
ENSG00000180354	C7orf41	1.007006124	6.74E-14
ENSG00000146826	C7orf43	0.205467703	0.492719244
ENSG00000165120	C7orf45	-0.66626488	1
ENSG00000122783	C7orf49	-0.084668715	1
ENSG00000146540	C7orf50	-0.107293693	0.888749954
ENSG00000181016	C7orf53	0.33369432	1
ENSG00000164898	C7orf55	0.456449897	0.102622424
ENSG00000164746	C7orf57	0.726532857	1
ENSG00000164603	C7orf60	0.007860126	1
ENSG00000185955	C7orf61	-0.184676068	1
ENSG00000164645	C7orf62	0	1
ENSG00000105792	C7orf63	2.754307813	4.08E-12
ENSG00000221845	C7orf65	-3.065780426	0.839452475
ENSG00000205174	C7orf66	0	1
ENSG00000136275	C7orf69	0.088769019	1
ENSG00000222004	C7orf71	0	1
ENSG00000164500	C7orf72	-0.224732264	1
ENSG00000243317	C7orf73	-0.265960359	0.358177408
ENSG00000197851	C7orf76	1.493430766	1
ENSG00000157131	C8A	0.178022184	1
ENSG00000021852	C8B	1.968408083	1
ENSG00000176919	C8G	-1.525954044	0.433230769
ENSG00000184608	C8orf12	-0.123107655	1
ENSG00000250733	C8orf17	0	1
ENSG00000168333	C8orf22	2.037971791	0.488772154
ENSG00000177335	C8orf31	0.581881054	0.628402051
ENSG00000182307	C8orf33	0.471839613	3.15E-05
ENSG00000165084	C8orf34	0.153818874	1
ENSG00000156172	C8orf37	-0.528669452	0.34135455
ENSG00000176907	C8orf4	-0.663220067	0.010959934
ENSG00000176209	C8orf40	-0.814043222	0.002723597
ENSG00000180190	C8orf42	0.666729329	0.015348708
ENSG00000213865	C8orf44	-0.095685817	1
ENSG00000169085	C8orf46	-1.566474467	5.06E-13
ENSG00000177459	C8orf47	0.874027039	0.881088702
ENSG00000164743	C8orf48	-0.990270633	0.258446808
ENSG00000255394	C8orf49	1.968899115	1
ENSG00000236939	C8orf56	-2.56466507	1
ENSG00000241852	C8orf58	-0.567094781	0.002268806
ENSG00000176731	C8orf59	-0.004479352	1
ENSG00000171060	C8orf74	0.178365508	1
ENSG00000189376	C8orf76	0.349706587	0.009707767
ENSG00000213563	C8orf82	-0.387078537	0.008800851
ENSG00000196166	C8orf86	-1.468498011	1
ENSG00000254318	C8orf87	-2.565017808	1
ENSG00000113600	C9	-0.596190213	7.99E-06
ENSG00000179082	C9orf106	0	1
ENSG00000198917	C9orf114	0.373593117	0.008332681
ENSG00000160345	C9orf116	0.675275739	0.00016692
ENSG00000160401	C9orf117	0.376578251	0.025248514
ENSG00000137038	C9orf123	0.094226934	1
ENSG00000204352	C9orf129	0.095548149	1
ENSG00000174038	C9orf131	-0.667155303	1
ENSG00000204711	C9orf135	0.789432503	0.954120814
ENSG00000180539	C9orf139	0.371464791	1
ENSG00000198454	C9orf141	0	1
ENSG00000148362	C9orf142	-0.277284023	0.223116755
ENSG00000230185	C9orf147	0.238447935	1
ENSG00000188959	C9orf152	0.676497363	1
ENSG00000187753	C9orf153	0.237848908	1
ENSG00000136932	C9orf156	0.258495396	0.606517933
ENSG00000171159	C9orf16	-0.096212131	1
ENSG00000196366	C9orf163	-0.621258529	0.662779236
ENSG00000197191	C9orf169	-0.210673834	1
ENSG00000204446	C9orf170	-0.951291273	0.577725862
ENSG00000188523	C9orf171	0.838011072	0.109316759
ENSG00000232434	C9orf172	-0.444827965	0.297509421
ENSG00000197768	C9orf173	-2.051356272	0.061426034
ENSG00000197816	C9orf174	-0.37414068	0.510657852
ENSG00000164972	C9orf24	-0.311897133	1
ENSG00000148120	C9orf3	-0.047908217	1
ENSG00000203993	C9orf37	-0.160254759	0.737068261
ENSG00000215066	C9orf38	-1.790042574	1
ENSG00000135045	C9orf40	0.071923772	1
ENSG00000156017	C9orf41	0.419111711	0.006918084
ENSG00000157653	C9orf43	0.103404553	1
ENSG00000186354	C9orf47	-0.931895817	0.223489262
ENSG00000179058	C9orf50	1.968899115	1
ENSG00000224854	C9orf53	0	1
ENSG00000204669	C9orf57	1.872038386	1
ENSG00000178243	C9orf62	0	1
ENSG00000165118	C9orf64	-0.013974697	1
ENSG00000183784	C9orf66	-2.708809848	0.140549516
ENSG00000238227	C9orf69	-0.494315498	0.000396633
ENSG00000147894	C9orf72	-0.292371002	0.312024392
ENSG00000136819	C9orf78	0.360589418	0.01337153
ENSG00000165181	C9orf84	-2.402354061	4.71E-83
ENSG00000155621	C9orf85	0.454593995	0.09961794
ENSG00000165233	C9orf89	-0.075805684	1
ENSG00000165698	C9orf9	-0.452354312	0.385852701
ENSG00000157693	C9orf91	0.18939444	0.732276937
ENSG00000205549	C9orf92	-0.322552074	1
ENSG00000198870	C9orf96	0.817427002	0.027231299
ENSG00000133742	CA1	1.180716757	0.521224271
ENSG00000154975	CA10	0.845771396	0.349636506
ENSG00000063180	CA11	-0.237398209	0.522333248
ENSG00000074410	CA12	0.407356072	0.000553714
ENSG00000185015	CA13	0.649734708	0.000209454
ENSG00000118298	CA14	-1.905680717	0.333043958
ENSG00000241527	CA15P1	0	1
ENSG00000234757	CA15P2	0	1
ENSG00000104267	CA2	0.599221666	7.21E-05
ENSG00000164879	CA3	0.684594793	0.207548998
ENSG00000167434	CA4	-0.154759917	1
ENSG00000174990	CA5A	0.645465975	0.006672307
ENSG00000260133	CA5AP1	0.622270359	0.532376554
ENSG00000169239	CA5B	0.130620661	0.900309326
ENSG00000186312	CA5BP1	0.147657854	0.808672284
ENSG00000131686	CA6	0.418341449	1
ENSG00000168748	CA7	-0.294796182	1
ENSG00000178538	CA8	1.191044542	0.000242607
ENSG00000107159	CA9	-2.159303113	0.146127097
ENSG00000120159	CAAP1	0.038985896	1
ENSG00000135932	CAB39	-0.044098744	1
ENSG00000102547	CAB39L	0.134460512	1
ENSG00000099991	CABIN1	-0.016632003	1
ENSG00000134508	CABLES1	-0.126602764	1
ENSG00000149679	CABLES2	-1.190436356	5.44E-13
ENSG00000157782	CABP1	-0.265910183	1
ENSG00000167791	CABP2	-0.596501893	1
ENSG00000175544	CABP4	0	1
ENSG00000105507	CABP5	0.719016764	1
ENSG00000100314	CABP7	0.289682292	0.871228395
ENSG00000145309	CABS1	0	1
ENSG00000154040	CABYR	-0.191382956	0.774218064
ENSG00000242983	CABYRP1	-0.315255591	1
ENSG00000160325	CACFD1	-0.598235471	0.002397921
ENSG00000158966	CACHD1	1.065954414	1.16E-14
ENSG00000141837	CACNA1A	-0.944523506	8.39E-08
ENSG00000148408	CACNA1B	-0.120573314	1
ENSG00000151067	CACNA1C	0.387602153	0.07076193
ENSG00000246627	CACNA1C-AS1	-0.033564816	1
ENSG00000256271	CACNA1C-AS2	1.871097574	1
ENSG00000256769	CACNA1C-AS3	0.474628752	1
ENSG00000256025	CACNA1C-AS4	0	1
ENSG00000256837	CACNA1C-IT1	0	1
ENSG00000256257	CACNA1C-IT2	0	1
ENSG00000256721	CACNA1C-IT3	0	1
ENSG00000157388	CACNA1D	-0.260357346	1
ENSG00000198216	CACNA1E	-0.187981929	1
ENSG00000102001	CACNA1F	-0.12991518	1
ENSG00000006283	CACNA1G	-1.137177273	0.000233863
ENSG00000250107	CACNA1G-AS1	-0.961966416	1
ENSG00000196557	CACNA1H	-0.3297475	0.022362181
ENSG00000100346	CACNA1I	-0.367205519	0.809440868
ENSG00000081248	CACNA1S	-0.316485339	1
ENSG00000153956	CACNA2D1	-0.056640659	1
ENSG00000007402	CACNA2D2	-0.168552817	1
ENSG00000157445	CACNA2D3	0.115264767	1
ENSG00000243715	CACNA2D3-AS1	-1.789943949	1
ENSG00000151062	CACNA2D4	-0.564393378	0.007805917
ENSG00000067191	CACNB1	0.894458225	2.73E-12
ENSG00000165995	CACNB2	0.050684484	1
ENSG00000167535	CACNB3	-0.645248857	2.44E-06
ENSG00000182389	CACNB4	0.948256325	1.53E-09
ENSG00000108878	CACNG1	-0.295727113	1
ENSG00000166862	CACNG2	-0.208198382	1
ENSG00000006116	CACNG3	-0.998214378	0.620645812
ENSG00000075461	CACNG4	0.229967376	1
ENSG00000075429	CACNG5	1.16469731	1
ENSG00000130433	CACNG6	-1.361862673	0.139833432
ENSG00000105605	CACNG7	-1.139499746	1.91E-07
ENSG00000142408	CACNG8	0.280731494	0.333043958
ENSG00000105298	CACTIN	0.572651113	1.54E-06
ENSG00000226800	CACTIN-AS1	0.578640678	5.99E-06
ENSG00000151893	CACUL1	0.294360738	0.043215065
ENSG00000116161	CACYBP	0.164618375	0.451466171
ENSG00000084774	CAD	0.003158084	1
ENSG00000182985	CADM1	-0.012379302	1
ENSG00000175161	CADM2	-0.156733014	1
ENSG00000239519	CADM2-AS1	-0.067425731	1
ENSG00000241648	CADM2-AS2	-2.564566651	1
ENSG00000162706	CADM3	-1.749104228	1.26E-19
ENSG00000105767	CADM4	-0.914480657	1.86E-10
ENSG00000163618	CADPS	-0.126283319	1
ENSG00000081803	CADPS2	-0.098019751	1
ENSG00000164304	CAGE1	-0.174721467	0.351964556
ENSG00000104327	CALB1	-0.663742608	0.341988419
ENSG00000172137	CALB2	-0.877972586	8.90E-13
ENSG00000110680	CALCA	1.968064759	1
ENSG00000175868	CALCB	-0.04274356	1
ENSG00000012822	CALCOCO1	-0.298256531	0.077957169
ENSG00000136436	CALCOCO2	-0.292638186	0.074854386
ENSG00000253179	CALCP	0	1
ENSG00000004948	CALCR	2.416855405	0.530426505
ENSG00000064989	CALCRL	-0.284924876	0.4811915
ENSG00000122786	CALD1	-0.375761733	0.002867002
ENSG00000185933	CALHM1	2.169564604	0.783919238
ENSG00000138172	CALHM2	0.558229802	0.115997097
ENSG00000183128	CALHM3	-3.437355675	0.530426505
ENSG00000198668	CALM1	-0.958556072	2.75E-12
ENSG00000223467	CALM1P1	-0.544233566	0.788527043
ENSG00000230564	CALM1P2	-0.586315181	1
ENSG00000143933	CALM2	-0.267469933	0.02923186
ENSG00000267170	CALM2P1	-0.309430564	0.458048147
ENSG00000229097	CALM2P2	-0.431125349	0.001256361
ENSG00000215482	CALM2P3	-0.409486592	0.021183668
ENSG00000233662	CALM2P4	-0.394083475	0.121525979
ENSG00000160014	CALM3	-0.767681974	1.64E-14
ENSG00000178363	CALML3	0	1
ENSG00000205488	CALML3-AS1	1.968408083	1
ENSG00000129007	CALML4	0.350708902	0.048183981
ENSG00000178372	CALML5	0	1
ENSG00000169885	CALML6	0.872594795	1
ENSG00000183166	CALN1	0.099940755	1
ENSG00000179218	CALR	-0.606597965	5.19E-10
ENSG00000269058	CALR3	0.441488168	1
ENSG00000227742	CALR4P	-0.380373044	1
ENSG00000128595	CALU	-0.2394868	0.069897591
ENSG00000130643	CALY	-0.160098195	1
ENSG00000134072	CAMK1	-0.072207184	1
ENSG00000183049	CAMK1D	0.271645781	0.38528726
ENSG00000008118	CAMK1G	-1.760560346	0.488772154
ENSG00000070808	CAMK2A	-0.476412054	1
ENSG00000058404	CAMK2B	0.960472172	0.399341621
ENSG00000145349	CAMK2D	-0.837212078	1.45E-07
ENSG00000148660	CAMK2G	-0.545397495	1.07E-06
ENSG00000162545	CAMK2N1	-0.641519146	6.18E-05
ENSG00000163888	CAMK2N2	-0.527007702	0.034539786
ENSG00000152495	CAMK4	-0.412762715	0.013795809
ENSG00000004660	CAMKK1	0.289715368	0.142496383
ENSG00000110931	CAMKK2	0.421089189	0.001353831
ENSG00000143919	CAMKMT	1.098167043	5.65E-09
ENSG00000164076	CAMKV	4.126103238	1.93E-158
ENSG00000164615	CAMLG	0.265968908	0.235669616
ENSG00000164047	CAMP	0	1
ENSG00000130559	CAMSAP1	0.474737161	2.52E-05
ENSG00000118200	CAMSAP2	0.265422015	0.070349982
ENSG00000076826	CAMSAP3	0.443895072	0.059809208
ENSG00000171735	CAMTA1	-0.176953873	0.547546424
ENSG00000237402	CAMTA1-IT1	0	1
ENSG00000108509	CAMTA2	0.047676964	1
ENSG00000111530	CAND1	-0.159425457	0.490748834
ENSG00000144712	CAND2	0.114352121	0.77428907
ENSG00000171302	CANT1	-0.387406074	0.000558033
ENSG00000127022	CANX	-0.28339571	0.014848766
ENSG00000131236	CAP1	-0.259494035	0.040562491
ENSG00000232004	CAP1P2	-0.28533397	0.110838021
ENSG00000112186	CAP2	-0.574951906	8.11E-05
ENSG00000259151	CAP2P1	-0.723389053	1
ENSG00000042493	CAPG	-1.075437669	6.28E-10
ENSG00000014216	CAPN1	-1.173859089	2.07E-27
ENSG00000142330	CAPN10	0.508974198	0.00060853
ENSG00000137225	CAPN11	0.217842033	1
ENSG00000182472	CAPN12	-0.533875264	0.03354321
ENSG00000162949	CAPN13	-0.054923715	1
ENSG00000214711	CAPN14	-0.879020142	0.712824192
ENSG00000162909	CAPN2	-0.366452084	0.001283452
ENSG00000092529	CAPN3	0.093970658	1
ENSG00000149260	CAPN5	-0.491769531	0.003945499
ENSG00000077274	CAPN6	-1.647393255	0.305843913
ENSG00000131375	CAPN7	0.139620815	0.963565869
ENSG00000203697	CAPN8	-0.374155135	0.178907319
ENSG00000135773	CAPN9	-0.960571453	1
ENSG00000126247	CAPNS1	-0.538465972	7.44E-07
ENSG00000215874	CAPNS1P1	-0.205125565	1
ENSG00000256812	CAPNS2	0	1
ENSG00000135387	CAPRIN1	0.089520787	0.998094387
ENSG00000110888	CAPRIN2	0.106003142	1
ENSG00000105519	CAPS	0.397092233	1
ENSG00000180881	CAPS2	-1.097243436	8.67E-05
ENSG00000152611	CAPSL	-0.989356623	0.258446808
ENSG00000116489	CAPZA1	-0.289435724	0.023548482
ENSG00000198898	CAPZA2	0.007010897	1
ENSG00000177938	CAPZA3	0	1
ENSG00000077549	CAPZB	-0.258041457	0.065967393
ENSG00000100065	CARD10	0.000185918	1
ENSG00000198286	CARD11	-1.1130039	9.74E-18
ENSG00000141527	CARD14	-0.329254718	0.329688807
ENSG00000204397	CARD16	-1.212464327	0.28922182
ENSG00000255221	CARD17	-2.565116257	1
ENSG00000255501	CARD18	-3.066329051	0.839452475
ENSG00000132357	CARD6	-0.968031495	1.03E-06
ENSG00000105483	CARD8	-0.489317703	0.004102193
ENSG00000187796	CARD9	0.698184601	2.03E-05
ENSG00000153048	CARHSP1	-0.8964655	5.68E-17
ENSG00000213995	CARKD	0.314481932	0.09384998
ENSG00000142453	CARM1	0.437965242	0.000108832
ENSG00000227835	CARM1P1	-1.415602548	0.922847702
ENSG00000172508	CARNS1	0.863530295	0.286461387
ENSG00000110619	CARS	0.488425205	3.66E-05
ENSG00000247473	CARS-AS1	0.47011735	0.020130104
ENSG00000134905	CARS2	0.317005628	0.179911288
ENSG00000164326	CARTPT	0	1
ENSG00000118307	CASC1	-0.187024454	1
ENSG00000177640	CASC2	0.577106606	0.11970589
ENSG00000108349	CASC3	0.098875718	0.95906544
ENSG00000166734	CASC4	-0.464198484	0.000992359
ENSG00000238132	CASC4P1	-0.626400152	0.113832579
ENSG00000137812	CASC5	-0.62442153	3.85E-06
ENSG00000127995	CASD1	-0.634976913	0.015346715
ENSG00000147044	CASK	-0.383216577	0.001208976
ENSG00000233033	CASK-AS1	-0.04014186	1
ENSG00000167971	CASKIN1	-0.278797286	0.099304354
ENSG00000177303	CASKIN2	-0.1213489	0.918815425
ENSG00000234059	CASKP1	-0.003045629	1
ENSG00000137752	CASP1	-1.318054965	0.028797847
ENSG00000003400	CASP10	-0.759254797	0.014604669
ENSG00000204403	CASP12	-2.564566651	1
ENSG00000105141	CASP14	-1.097372343	1
ENSG00000228146	CASP16	-0.724555277	1
ENSG00000255430	CASP1P1	0	1
ENSG00000254750	CASP1P2	-1.790494539	1
ENSG00000106144	CASP2	-0.125383011	1
ENSG00000164305	CASP3	-0.355783288	0.062481354
ENSG00000237033	CASP3P1	-0.390559257	1
ENSG00000196954	CASP4	-0.684370053	0.000164969
ENSG00000137757	CASP5	-0.602796376	1
ENSG00000138794	CASP6	-0.696851094	0.002357055
ENSG00000165806	CASP7	0.157115885	0.821939443
ENSG00000064012	CASP8	-0.106217743	1
ENSG00000118412	CASP8AP2	-0.516774679	0.011194589
ENSG00000132906	CASP9	-0.846695405	0.000623691
ENSG00000143318	CASQ1	-1.615325597	0.150710641
ENSG00000118729	CASQ2	-0.016172532	1
ENSG00000036828	CASR	0.389604836	1
ENSG00000087589	CASS4	0.45793547	1
ENSG00000153113	CAST	-0.508545331	1.04E-05
ENSG00000130940	CASZ1	0.260291092	0.37811862
ENSG00000121691	CAT	-1.029808324	3.95E-11
ENSG00000175294	CATSPER1	-0.657997227	0.039828215
ENSG00000166762	CATSPER2	0.173215198	0.821836011
ENSG00000205771	CATSPER2P1	-0.139748337	0.839452475
ENSG00000152705	CATSPER3	-0.603985102	0.371598007
ENSG00000188782	CATSPER4	0.762710829	0.845518412
ENSG00000133962	CATSPERB	0.554480525	0.196252622
ENSG00000174898	CATSPERD	0.486415342	0.752121179
ENSG00000099338	CATSPERG	-0.116910381	1
ENSG00000105974	CAV1	-1.88162138	1.29E-59
ENSG00000105971	CAV2	-0.523746753	0.030019444
ENSG00000182533	CAV3	0.294709683	0.757283508
ENSG00000078699	CBFA2T2	0.104228413	1
ENSG00000129993	CBFA2T3	-0.015494089	1
ENSG00000067955	CBFB	0.271628333	0.071056119
ENSG00000110395	CBL	-0.03056128	1
ENSG00000114423	CBLB	0.401240895	0.438557469
ENSG00000142273	CBLC	0.022808124	1
ENSG00000105879	CBLL1	0.322992072	0.048312639
ENSG00000102924	CBLN1	0	1
ENSG00000141668	CBLN2	-0.037620518	1
ENSG00000139899	CBLN3	-0.674081141	0.016446238
ENSG00000054803	CBLN4	-1.790042574	1
ENSG00000159228	CBR1	0.060493887	1
ENSG00000159231	CBR3	0.022754934	1
ENSG00000236830	CBR3-AS1	0.192872833	0.783919238
ENSG00000145439	CBR4	-0.860822676	9.27E-18
ENSG00000160200	CBS	0.451215211	9.26E-05
ENSG00000172785	CBWD1	0.436153151	0.009310718
ENSG00000136682	CBWD2	0.383111486	0.009876151
ENSG00000196873	CBWD3	0.516837299	8.89E-05
ENSG00000147996	CBWD5	0.417338001	0.006801735
ENSG00000204790	CBWD6	0.563795796	0.000151174
ENSG00000215126	CBWD7	0.488883531	0.026042363
ENSG00000108468	CBX1	-0.4351436	0.000172932
ENSG00000230823	CBX1P1	-0.266719866	1
ENSG00000214322	CBX1P2	-0.594626444	0.036140041
ENSG00000237379	CBX1P3	-0.879130787	0.20182045
ENSG00000214321	CBX1P4	-0.164355285	1
ENSG00000231516	CBX1P5	-3.066329051	0.839452475
ENSG00000173894	CBX2	-0.39369032	0.001104672
ENSG00000122565	CBX3	-0.235403763	0.113707626
ENSG00000177447	CBX3P1	-0.290182854	0.671980984
ENSG00000266405	CBX3P2	0.770613365	1
ENSG00000250045	CBX3P3	-0.560714218	0.344971388
ENSG00000256030	CBX3P4	-0.343465937	0.651031334
ENSG00000257666	CBX3P5	-0.608549227	0.26232649
ENSG00000228837	CBX3P6	0	1
ENSG00000197692	CBX3P7	0	1
ENSG00000254496	CBX3P8	2.77133639	1
ENSG00000217241	CBX3P9	-0.380817539	0.027015921
ENSG00000141582	CBX4	0.11229862	1
ENSG00000094916	CBX5	-0.714803786	1.02E-11
ENSG00000241535	CBX5P1	-1.079457867	0.090594742
ENSG00000183741	CBX6	-0.080702464	1
ENSG00000100307	CBX7	-0.909844791	4.31E-10
ENSG00000141570	CBX8	-0.086296272	1
ENSG00000100211	CBY1	-0.236392564	0.660497793
ENSG00000204659	CBY3	1.494618483	1
ENSG00000132024	CC2D1A	0.09247429	1
ENSG00000154222	CC2D1B	-0.249285961	0.168800496
ENSG00000048342	CC2D2A	-0.085711641	1
ENSG00000188649	CC2D2B	-0.025572561	1
ENSG00000060339	CCAR1	0.070226357	1
ENSG00000183287	CCBE1	-0.183208657	0.563201723
ENSG00000171097	CCBL1	-0.205082945	0.783919238
ENSG00000137944	CCBL2	-0.044362648	1
ENSG00000144648	CCBP2	0.042184313	1
ENSG00000176476	CCDC101	0.371746618	0.247768155
ENSG00000135736	CCDC102A	-0.747434284	2.47E-06
ENSG00000150636	CCDC102B	-0.119077564	1
ENSG00000167131	CCDC103	0.069702928	1
ENSG00000163001	CCDC104	-0.024301303	1
ENSG00000160994	CCDC105	1.096195679	1
ENSG00000173581	CCDC106	0.21708424	0.289676095
ENSG00000159884	CCDC107	-0.644268011	5.07E-05
ENSG00000181378	CCDC108	0.544182068	0.844870466
ENSG00000005059	CCDC109B	-0.248315953	0.384376431
ENSG00000172361	CCDC11	0.119325749	1
ENSG00000168491	CCDC110	1.403765442	0.0124331
ENSG00000164306	CCDC111	-0.782980069	5.40E-05
ENSG00000164221	CCDC112	0.229108648	1
ENSG00000103021	CCDC113	0.490502916	0.012730857
ENSG00000105479	CCDC114	-0.144100552	1
ENSG00000136710	CCDC115	-0.060379079	1
ENSG00000161180	CCDC116	-0.566958115	1
ENSG00000159873	CCDC117	-0.295637064	0.184547411
ENSG00000251515	CCDC11P1	0	1
ENSG00000160799	CCDC12	0.308139651	0.084871791
ENSG00000147144	CCDC120	0.06702051	1
ENSG00000176714	CCDC121	0.203949125	1
ENSG00000151773	CCDC122	-0.191150718	1
ENSG00000007080	CCDC124	0.143353666	0.628402051
ENSG00000183323	CCDC125	-0.283374483	0.158616385
ENSG00000169193	CCDC126	0.188435921	1
ENSG00000164366	CCDC127	-0.017110314	1
ENSG00000180347	CCDC129	0.95118239	0.620645812
ENSG00000244607	CCDC13	0.181400153	1
ENSG00000173811	CCDC13-AS1	-0.850872409	0.954120814
ENSG00000104957	CCDC130	0.126743582	1
ENSG00000004766	CCDC132	0.102891355	1
ENSG00000100147	CCDC134	-0.296580752	0.536117864
ENSG00000159625	CCDC135	-0.023810028	1
ENSG00000128596	CCDC136	0.02987131	1
ENSG00000185298	CCDC137	0.516049638	1.76E-06
ENSG00000163006	CCDC138	0.392510741	0.073453908
ENSG00000175455	CCDC14	-0.48618217	2.55E-05
ENSG00000163081	CCDC140	-1.790494539	1
ENSG00000163492	CCDC141	1.642372857	0.003723524
ENSG00000135637	CCDC142	-0.162698374	0.595399375
ENSG00000170160	CCDC144A	0.132147921	0.954388022
ENSG00000154874	CCDC144B	0.008151183	1
ENSG00000154898	CCDC144C	-0.179408623	0.906968221
ENSG00000205212	CCDC144NL	-0.142105593	0.702879105
ENSG00000135205	CCDC146	-0.183653735	1
ENSG00000120051	CCDC147	0.273675742	1
ENSG00000153237	CCDC148	-0.396173181	0.190977273
ENSG00000227480	CCDC148-AS1	-1.405671376	0.089493291
ENSG00000181982	CCDC149	-0.095312956	1
ENSG00000149548	CCDC15	-0.843099907	0.041576408
ENSG00000144395	CCDC150	0.04834768	1
ENSG00000198003	CCDC151	-0.470427257	0.138033979
ENSG00000198865	CCDC152	0.100013664	1
ENSG00000248712	CCDC153	-0.315956156	1
ENSG00000197599	CCDC154	-0.379079155	1
ENSG00000161609	CCDC155	0.217109033	1
ENSG00000187860	CCDC157	-0.061786207	1
ENSG00000163749	CCDC158	-0.179540666	1
ENSG00000183401	CCDC159	0.161137569	1
ENSG00000203952	CCDC160	1.493639466	1
ENSG00000203799	CCDC162P	0.28248051	1
ENSG00000236624	CCDC163P	-0.436539081	0.196767153
ENSG00000157856	CCDC164	0.380124237	1
ENSG00000255181	CCDC166	0	1
ENSG00000198937	CCDC167	-0.033191028	1
ENSG00000175820	CCDC168	0	1
ENSG00000242715	CCDC169	0.419900198	0.564364741
ENSG00000250709	CCDC169-SOHLH2	0.375534494	0.376970236
ENSG00000159588	CCDC17	0.13051115	1
ENSG00000120262	CCDC170	0.033873259	1
ENSG00000164989	CCDC171	-0.664272733	0.027537181
ENSG00000182645	CCDC172	0.206279569	1
ENSG00000154479	CCDC173	0.243948154	0.788373046
ENSG00000154781	CCDC174	0.725780126	5.83E-06
ENSG00000151838	CCDC175	-0.073366159	1
ENSG00000119636	CCDC176	-0.628545893	0.000956173
ENSG00000255994	CCDC177	1.968899115	1
ENSG00000166960	CCDC178	0.583967439	0.775383817
ENSG00000255359	CCDC179	2.77133639	1
ENSG00000122483	CCDC18	0.019326504	1
ENSG00000213085	CCDC19	0.184473702	1
ENSG00000101997	CCDC22	-0.39542602	0.015319376
ENSG00000177868	CCDC23	-0.500989793	0.184231851
ENSG00000159214	CCDC24	-0.87688257	7.16E-07
ENSG00000147419	CCDC25	-0.729070659	2.24E-05
ENSG00000229140	CCDC26	-1.156841784	0.490963645
ENSG00000162592	CCDC27	-0.295628877	1
ENSG00000024862	CCDC28A	-0.174218286	0.964500154
ENSG00000160050	CCDC28B	-0.572308335	0.030019444
ENSG00000151468	CCDC3	0.245672146	0.156374032
ENSG00000186409	CCDC30	-1.581984248	4.79E-26
ENSG00000140481	CCDC33	0.398044928	1
ENSG00000109881	CCDC34	-0.349040929	0.223656892
ENSG00000250556	CCDC34P1	0	1
ENSG00000173421	CCDC36	0.062100778	1
ENSG00000163885	CCDC37	-0.512007085	1
ENSG00000165972	CCDC38	-0.21237761	1
ENSG00000145075	CCDC39	-0.24143639	0.147154156
ENSG00000243187	CCDC39-AS1	0.206318582	1
ENSG00000141519	CCDC40	0.187016887	0.878252112
ENSG00000173588	CCDC41	0.019501858	1
ENSG00000161973	CCDC42	2.171463623	0.530426505
ENSG00000186710	CCDC42B	0.347942595	0.010070477
ENSG00000180329	CCDC43	0.129139056	0.942067087
ENSG00000108588	CCDC47	0.111749974	0.824788663
ENSG00000152492	CCDC50	-0.265720915	0.112459229
ENSG00000164051	CCDC51	0.183984384	0.444008773
ENSG00000120860	CCDC53	-0.829420986	0.021144536
ENSG00000138483	CCDC54	0	1
ENSG00000176155	CCDC57	0.398893706	0.002622197
ENSG00000160124	CCDC58	0.717501069	1.03E-07
ENSG00000264311	CCDC58P1	0.982507112	2.91E-05
ENSG00000236944	CCDC58P2	0.17812081	1
ENSG00000267076	CCDC58P3	0.695380123	0.004045552
ENSG00000256681	CCDC58P5	0.225174867	1
ENSG00000133773	CCDC59	0.764396612	2.40E-07
ENSG00000108091	CCDC6	0.278573657	0.039036865
ENSG00000183273	CCDC60	0.059219781	1
ENSG00000104983	CCDC61	0.77589387	0.164259378
ENSG00000130783	CCDC62	-0.860147868	0.000439889
ENSG00000173093	CCDC63	-0.183445695	1
ENSG00000135127	CCDC64	0.143243331	0.950249292
ENSG00000162069	CCDC64B	0.705555266	0.970311513
ENSG00000139537	CCDC65	0.203377275	0.481978587
ENSG00000180376	CCDC66	0.330971005	0.141468676
ENSG00000165325	CCDC67	0.513042053	1
ENSG00000166510	CCDC68	0.242393263	1
ENSG00000198624	CCDC69	-0.609090871	0.001435436
ENSG00000216937	CCDC7	-0.185052537	0.940166687
ENSG00000123171	CCDC70	1.968064759	1
ENSG00000177352	CCDC71	0.073942728	1
ENSG00000253276	CCDC71L	-0.54305	0.34135455
ENSG00000186714	CCDC73	0.271077483	0.317458403
ENSG00000163040	CCDC74A	0.436439812	0.043807115
ENSG00000152076	CCDC74B	0.504106273	0.009822438
ENSG00000223760	CCDC74B-AS1	-0.565902108	0.100905767
ENSG00000182921	CCDC75P1	0.309470439	1
ENSG00000120647	CCDC77	-0.029202777	1
ENSG00000162004	CCDC78	0.922906916	1.05E-05
ENSG00000249961	CCDC79	0.492660547	1
ENSG00000169515	CCDC8	-1.098273248	1
ENSG00000091986	CCDC80	-2.165783534	2.52E-50
ENSG00000149201	CCDC81	0.381819641	1
ENSG00000149231	CCDC82	-0.23155535	0.627467179
ENSG00000150676	CCDC83	0.205399982	0.929703784
ENSG00000186166	CCDC84	0.155914003	0.724737913
ENSG00000055813	CCDC85A	-0.562607054	0.832886015
ENSG00000175602	CCDC85B	0.109107186	0.973026197
ENSG00000205476	CCDC85C	0.215275738	0.229583838
ENSG00000110104	CCDC86	0.6219309	6.46E-09
ENSG00000182791	CCDC87	-2.401987759	0.223872325
ENSG00000115355	CCDC88A	0.055064985	1
ENSG00000168071	CCDC88B	-1.398159077	6.13E-07
ENSG00000015133	CCDC88C	-0.347213795	0.093388707
ENSG00000179071	CCDC89	-2.565116257	1
ENSG00000105321	CCDC9	0.169987017	0.839452475
ENSG00000050393	CCDC90A	0.138045901	1
ENSG00000137500	CCDC90B	-0.018963908	1
ENSG00000123106	CCDC91	0.074349618	1
ENSG00000119242	CCDC92	-0.85555864	0.004487774
ENSG00000125633	CCDC93	0.159635925	0.473067361
ENSG00000105248	CCDC94	0.384949016	0.029845861
ENSG00000173013	CCDC96	-0.407394065	1
ENSG00000142039	CCDC97	-0.031030405	1
ENSG00000197651	CCER1	-1.096881311	1
ENSG00000204536	CCHCR1	-0.668719372	5.49E-07
ENSG00000206355	CCHCR1	0	1
ENSG00000206457	CCHCR1	0	1
ENSG00000223533	CCHCR1	0	1
ENSG00000224180	CCHCR1	0	1
ENSG00000234114	CCHCR1	0	1
ENSG00000185972	CCIN	-1.214747893	0.000439072
ENSG00000187094	CCK	0.981735162	1
ENSG00000163394	CCKAR	2.77133639	1
ENSG00000110148	CCKBR	-1.764445606	0.783919238
ENSG00000108702	CCL1	0	1
ENSG00000172156	CCL11	0	1
ENSG00000181374	CCL13	0	1
ENSG00000213494	CCL14	0.207210871	1
ENSG00000267596	CCL15	0.178955165	1
ENSG00000161574	CCL15-CCL14	0.207210871	1
ENSG00000161573	CCL16	1.968064759	1
ENSG00000102970	CCL17	3.283730918	0.839452475
ENSG00000006074	CCL18	0	1
ENSG00000172724	CCL19	-1.790042574	1
ENSG00000108691	CCL2	-0.68535271	0.169638948
ENSG00000115009	CCL20	-0.497366149	0.99291541
ENSG00000137077	CCL21	0	1
ENSG00000102962	CCL22	2.770503696	1
ENSG00000167236	CCL23	0	1
ENSG00000106178	CCL24	-0.227242308	1
ENSG00000131142	CCL25	0.594214309	1
ENSG00000006606	CCL26	-0.793696414	0.142874083
ENSG00000213927	CCL27	-1.359258618	0.03709363
ENSG00000151882	CCL28	-0.986286393	0.184152155
ENSG00000006075	CCL3	-0.451250257	0.774218064
ENSG00000205021	CCL3L1	-0.154006217	1
ENSG00000256515	CCL3L3	-0.961061022	1
ENSG00000129277	CCL4	-3.065780426	0.839452475
ENSG00000205020	CCL4L1	-1.789943949	1
ENSG00000197262	CCL4L2	0	1
ENSG00000161570	CCL5	-1.76369552	1
ENSG00000108688	CCL7	0	1
ENSG00000108700	CCL8	0	1
ENSG00000136280	CCM2	-0.187751637	0.474158914
ENSG00000101331	CCM2L	-0.872104523	0.286461387
ENSG00000133101	CCNA1	-1.789943949	1
ENSG00000145386	CCNA2	-0.407092128	0.000682134
ENSG00000134057	CCNB1	-0.319741872	0.005420101
ENSG00000100814	CCNB1IP1	0.691140009	1.41E-08
ENSG00000229815	CCNB1IP1P1	0.644850297	0.178998749
ENSG00000230860	CCNB1IP1P2	-2.56446824	1
ENSG00000231001	CCNB1IP1P3	0.002765516	1
ENSG00000157456	CCNB2	-0.538854515	3.47E-06
ENSG00000147082	CCNB3	-0.366135287	0.47166742
ENSG00000112237	CCNC	0.203583861	0.363969396
ENSG00000110092	CCND1	0.665337754	2.96E-11
ENSG00000118971	CCND2	0.923113176	4.38E-21
ENSG00000112576	CCND3	-0.031973627	1
ENSG00000166946	CCNDBP1	-0.137177818	1
ENSG00000105173	CCNE1	0.552030352	1.55E-06
ENSG00000175305	CCNE2	-0.702751654	0.000218878
ENSG00000162063	CCNF	-0.420771805	0.000196192
ENSG00000113328	CCNG1	-0.502238675	0.00011761
ENSG00000218991	CCNG1P1	-0.166794003	1
ENSG00000138764	CCNG2	-1.314464668	2.13E-09
ENSG00000134480	CCNH	0.444707607	0.006377527
ENSG00000118816	CCNI	-0.556924354	3.38E-07
ENSG00000205089	CCNI2	-1.096783106	1
ENSG00000107443	CCNJ	0.877138011	3.25E-12
ENSG00000135083	CCNJL	-0.601746045	2.08E-05
ENSG00000227491	CCNJP1	0.435963646	1
ENSG00000223896	CCNJP2	1.096513376	1
ENSG00000090061	CCNK	0.192516801	0.306596522
ENSG00000163660	CCNL1	0.471492631	0.000888656
ENSG00000221978	CCNL2	-0.053462972	1
ENSG00000152669	CCNO	0.514771855	0.004187674
ENSG00000129315	CCNT1	0.451504255	0.000245091
ENSG00000082258	CCNT2	0.561980963	1.13E-05
ENSG00000225672	CCNT2P1	0.441817723	1
ENSG00000108100	CCNY	0.079530409	1
ENSG00000163249	CCNYL1	-0.356102783	0.09420361
ENSG00000182632	CCNYL2	-0.140988379	0.945792459
ENSG00000216671	CCNYL3	1.17965077	0.688581822
ENSG00000103540	CCP110	0.422868374	0.019130495
ENSG00000260916	CCPG1	-0.238815936	0.400980106
ENSG00000163823	CCR1	0	1
ENSG00000184451	CCR10	-0.595865961	0.081807415
ENSG00000238241	CCR12P	-0.597051498	1
ENSG00000121807	CCR2	0	1
ENSG00000183625	CCR3	-0.434275572	0.761453472
ENSG00000183813	CCR4	3.66090977	0.530426505
ENSG00000160791	CCR5	0	1
ENSG00000112486	CCR6	-1.001575371	0.620645812
ENSG00000126353	CCR7	-1.764403692	0.783919238
ENSG00000179934	CCR8	0	1
ENSG00000173585	CCR9	0.17757022	1
ENSG00000129048	CCRL1	0.736544819	0.141111845
ENSG00000121797	CCRL2	-1.582523922	0.18979533
ENSG00000151014	CCRN4L	1.192096775	1.29E-19
ENSG00000173992	CCS	-0.223810989	0.642449084
ENSG00000154429	CCSAP	0.199766054	0.715159409
ENSG00000184305	CCSER1	-2.114831983	8.56E-65
ENSG00000107771	CCSER2	-0.28970579	0.046657327
ENSG00000166226	CCT2	0.139238263	0.534271822
ENSG00000163468	CCT3	0.075235979	1
ENSG00000115484	CCT4	0.00995701	1
ENSG00000242703	CCT4P1	-0.078318774	1
ENSG00000225569	CCT4P2	-0.294737801	1
ENSG00000150753	CCT5	0.159451717	0.355141232
ENSG00000250444	CCT5P1	0.233960598	0.15789756
ENSG00000230584	CCT5P2	0.160249897	0.466808986
ENSG00000146731	CCT6A	0.036820958	1
ENSG00000132141	CCT6B	0.185360509	0.854257686
ENSG00000228409	CCT6P1	0.175022908	0.735858948
ENSG00000250526	CCT6P2	-0.121218873	0.87943317
ENSG00000234585	CCT6P3	0.275864176	0.215647743
ENSG00000232610	CCT6P4	-0.10128503	1
ENSG00000135624	CCT7	0.199768755	0.158195806
ENSG00000217733	CCT7P1	0.099095188	1
ENSG00000249958	CCT7P2	0.140501102	1
ENSG00000156261	CCT8	0.198602932	0.165784968
ENSG00000020219	CCT8L1P	0	1
ENSG00000198445	CCT8L2	0	1
ENSG00000226015	CCT8P1	0.170039852	0.343677932
ENSG00000122674	CCZ1	0.192019372	0.316139999
ENSG00000146574	CCZ1B	0.171451809	0.481498827
ENSG00000134256	CD101	0.349208123	1
ENSG00000156535	CD109	-1.227024438	2.10E-25
ENSG00000170458	CD14	-0.407791507	1
ENSG00000177697	CD151	-0.295645812	0.014381669
ENSG00000117281	CD160	0.002114944	1
ENSG00000177575	CD163	1.940164689	5.55E-07
ENSG00000177675	CD163L1	0.051503499	1
ENSG00000135535	CD164	-0.166249207	0.420458116
ENSG00000174950	CD164L2	0	1
ENSG00000204936	CD177	-0.902857208	1
ENSG00000204933	CD177P1	0.217559386	1
ENSG00000134061	CD180	-2.563690797	0.223872325
ENSG00000177455	CD19	0.207053305	1
ENSG00000158477	CD1A	-1.789943949	1
ENSG00000158485	CD1B	0	1
ENSG00000158481	CD1C	0	1
ENSG00000158473	CD1D	-1.181340756	0.328148358
ENSG00000158488	CD1E	0	1
ENSG00000116824	CD2	-1.790042574	1
ENSG00000091972	CD200	-2.039963124	1.17E-07
ENSG00000163606	CD200R1	1.353137349	0.803565461
ENSG00000206531	CD200R1L	-2.56446824	1
ENSG00000116031	CD207	-3.437004094	0.530426505
ENSG00000090659	CD209	-0.116173538	1
ENSG00000012124	CD22	-0.748931255	0.095065294
ENSG00000150637	CD226	0.995401876	0.175449544
ENSG00000122223	CD244	-0.094099836	1
ENSG00000198821	CD247	1.042048587	0.033348404
ENSG00000174807	CD248	2.77133639	1
ENSG00000261333	CD24P2	0	1
ENSG00000185275	CD24P4	-1.790494539	1
ENSG00000139193	CD27	-0.313602006	0.26590035
ENSG00000215039	CD27-AS1	-0.387832935	0.065049925
ENSG00000120217	CD274	0.72951962	2.62E-05
ENSG00000103855	CD276	0.134086157	0.61492421
ENSG00000178562	CD28	-1.59801412	0.688581822
ENSG00000198087	CD2AP	-0.075792925	1
ENSG00000169217	CD2BP2	-0.050233	1
ENSG00000167851	CD300A	2.97651572	0.086353222
ENSG00000167850	CD300C	0	1
ENSG00000186407	CD300E	0.071102797	1
ENSG00000178789	CD300LB	3.335602006	7.00E-12
ENSG00000204345	CD300LD	-3.732853689	0.320796081
ENSG00000186074	CD300LF	0.869696671	1
ENSG00000161649	CD300LG	0.17812081	1
ENSG00000241399	CD302	-1.524934993	0.688581822
ENSG00000167775	CD320	0.289914895	0.032243833
ENSG00000105383	CD33	0.455009419	0.18830005
ENSG00000174059	CD34	-1.102394417	0.139833432
ENSG00000135218	CD36	0.065683977	1
ENSG00000104894	CD37	-1.14392969	8.49E-10
ENSG00000004468	CD38	0.303617048	1
ENSG00000167286	CD3D	-0.098749463	1
ENSG00000198851	CD3E	2.77084622	1
ENSG00000117877	CD3EAP	0.694846105	1.03E-09
ENSG00000160654	CD3G	1.871208327	1
ENSG00000010610	CD4	0.207907751	1
ENSG00000101017	CD40	-0.162184424	0.704671434
ENSG00000102245	CD40LG	0	1
ENSG00000026508	CD44	-0.325838056	0.00605119
ENSG00000117335	CD46	-0.012393061	1
ENSG00000244703	CD46P1	-0.475184955	0.788463069
ENSG00000196776	CD47	-0.597448498	5.65E-05
ENSG00000117091	CD48	-0.380225741	1
ENSG00000110448	CD5	0.223649721	1
ENSG00000169442	CD52	0.981293816	1
ENSG00000143119	CD53	0.935195617	0.775383817
ENSG00000196352	CD55	0.738646872	2.74E-08
ENSG00000116815	CD58	0.005862567	1
ENSG00000085063	CD59	-0.086639161	1
ENSG00000073754	CD5L	-0.098524769	1
ENSG00000013725	CD6	-0.882939399	0.577725862
ENSG00000135404	CD63	-0.647310924	2.66E-10
ENSG00000129226	CD68	-0.819773889	3.28E-05
ENSG00000110848	CD69	1.968064759	1
ENSG00000173762	CD7	-1.789943949	1
ENSG00000125726	CD70	-0.518079258	1.24E-05
ENSG00000137101	CD72	-0.437655729	0.113832579
ENSG00000019582	CD74	0.816944255	0.376731546
ENSG00000105369	CD79A	2.772169562	1
ENSG00000007312	CD79B	-1.790042574	1
ENSG00000121594	CD80	-0.66733624	0.215041339
ENSG00000110651	CD81	0.126047433	0.692733994
ENSG00000085117	CD82	-1.182689288	1.10E-10
ENSG00000112149	CD83	-0.021129529	1
ENSG00000066294	CD84	0.206661303	1
ENSG00000114013	CD86	0.523357096	1
ENSG00000153563	CD8A	0.859329219	0.20182045
ENSG00000172116	CD8B	0.688581404	1
ENSG00000254126	CD8BP	0.225116266	1
ENSG00000010278	CD9	-0.938955797	1.72E-17
ENSG00000125810	CD93	2.770503696	1
ENSG00000153283	CD96	-0.734257915	0.012286231
ENSG00000123146	CD97	-0.084474193	1
ENSG00000002586	CD99	-0.61231835	0.003815887
ENSG00000102181	CD99L2	-0.872769441	2.59E-09
ENSG00000223773	CD99P1	1.529815138	0.001524288
ENSG00000158825	CDA	-2.025781532	6.27E-22
ENSG00000102543	CDADC1	0.092788741	1
ENSG00000140326	CDAN1	-0.206907587	0.635378526
ENSG00000151465	CDC123	0.398980339	0.000883397
ENSG00000079335	CDC14A	0.537026955	0.006392832
ENSG00000081377	CDC14B	0.142575427	0.956823241
ENSG00000130177	CDC16	-0.088600512	1
ENSG00000117399	CDC20	-0.412343839	0.000125851
ENSG00000164287	CDC20B	-1.053918187	6.70E-19
ENSG00000231007	CDC20P1	-0.389023165	0.001242217
ENSG00000094880	CDC23	0.014338203	1
ENSG00000164045	CDC25A	0.768753788	3.87E-12
ENSG00000101224	CDC25B	-0.938179399	5.61E-18
ENSG00000158402	CDC25C	-0.853471092	1.01E-06
ENSG00000176386	CDC26	0.18591873	0.530426505
ENSG00000004897	CDC27	-0.241680988	0.112226332
ENSG00000233786	CDC27P1	0.141276043	1
ENSG00000237447	CDC27P2	-0.393259927	0.18756724
ENSG00000099804	CDC34	0.346112059	0.008840907
ENSG00000105401	CDC37	0.574873215	1.59E-08
ENSG00000106993	CDC37L1	0.404715209	0.045327035
ENSG00000259982	CDC37P1	0.4031847	1
ENSG00000168438	CDC40	0.144898113	1
ENSG00000070831	CDC42	-0.47376533	5.29E-05
ENSG00000230068	CDC42-IT1	1.870267792	1
ENSG00000143776	CDC42BPA	-0.450634791	0.00313004
ENSG00000198752	CDC42BPB	-0.039669979	1
ENSG00000171219	CDC42BPG	-0.038931156	1
ENSG00000128283	CDC42EP1	0.20378317	0.185878216
ENSG00000149798	CDC42EP2	0.667945555	1.30E-06
ENSG00000163171	CDC42EP3	0.121315895	1
ENSG00000179604	CDC42EP4	-0.234249901	0.124922778
ENSG00000167617	CDC42EP5	-2.525283438	7.10E-05
ENSG00000234933	CDC42P1	0.043724646	1
ENSG00000234844	CDC42P2	-0.093004274	1
ENSG00000253971	CDC42P3	0.044369134	1
ENSG00000249965	CDC42P4	-0.379599856	1
ENSG00000253439	CDC42P5	-0.753879086	0.051166922
ENSG00000237350	CDC42P6	-0.319079826	0.071151804
ENSG00000197622	CDC42SE1	0.183816619	0.312063594
ENSG00000158985	CDC42SE2	0.060872749	1
ENSG00000093009	CDC45	0.155137888	0.481251381
ENSG00000096401	CDC5L	0.052030612	1
ENSG00000094804	CDC6	0.106931378	0.940760261
ENSG00000097046	CDC7	-0.216374612	0.427202608
ENSG00000134371	CDC73	-0.055220071	1
ENSG00000184661	CDCA2	-0.451683506	0.000971301
ENSG00000111665	CDCA3	-0.562782914	1.08E-05
ENSG00000170779	CDCA4	-0.109216907	1
ENSG00000146670	CDCA5	0.195845928	0.22735678
ENSG00000144354	CDCA7	-0.286838263	0.223506927
ENSG00000164649	CDCA7L	0.095819315	1
ENSG00000134690	CDCA8	-0.261284677	0.059931607
ENSG00000163814	CDCP1	0.405602386	1
ENSG00000157211	CDCP2	-0.071554556	1
ENSG00000039068	CDH1	0.756362879	0.125581884
ENSG00000040731	CDH10	-0.219292193	1
ENSG00000140937	CDH11	-1.128709399	0.001036968
ENSG00000154162	CDH12	0.383588908	0.000686796
ENSG00000254335	CDH12P1	1.493540841	1
ENSG00000249230	CDH12P2	-0.960529951	1
ENSG00000253492	CDH12P3	-1.206358006	0.922847702
ENSG00000253900	CDH12P4	1.097025461	1
ENSG00000140945	CDH13	-0.129802729	1
ENSG00000129910	CDH15	0.490361053	0.649706648
ENSG00000166589	CDH16	-1.468841335	1
ENSG00000079112	CDH17	1.18069664	0.775383817
ENSG00000145526	CDH18	0.035638236	1
ENSG00000071991	CDH19	-1.097274138	1
ENSG00000170558	CDH2	-0.374872715	0.00283947
ENSG00000101542	CDH20	-0.272315284	0.218099658
ENSG00000149654	CDH22	0.694711004	0.52030739
ENSG00000107736	CDH23	-0.228824825	1
ENSG00000223817	CDH23-AS1	0.17812081	1
ENSG00000139880	CDH24	0.068888723	1
ENSG00000124215	CDH26	0.790354971	0.954120814
ENSG00000062038	CDH3	-0.193016885	0.804724574
ENSG00000179242	CDH4	-0.14583159	0.69689979
ENSG00000179776	CDH5	0.233329525	1
ENSG00000113361	CDH6	-2.246077319	0.016855277
ENSG00000081138	CDH7	0.476287124	1
ENSG00000150394	CDH8	-0.361051786	1
ENSG00000113100	CDH9	0.022949915	1
ENSG00000148600	CDHR1	-0.112621416	0.966590581
ENSG00000074276	CDHR2	-0.723345487	0.052968853
ENSG00000128536	CDHR3	0.355395241	0.348957849
ENSG00000187492	CDHR4	0.227444188	1
ENSG00000099834	CDHR5	-0.823275685	0.922847702
ENSG00000089486	CDIP1	0.387809706	0.001718969
ENSG00000103502	CDIPT	0.04145869	1
ENSG00000170312	CDK1	-0.359271477	0.006677443
ENSG00000185324	CDK10	0.076635233	1
ENSG00000008128	CDK11A	0.477793339	0.000227721
ENSG00000248333	CDK11B	0.526552332	3.26E-05
ENSG00000167258	CDK12	0.341379355	0.004186646
ENSG00000065883	CDK13	0.229441083	0.193973844
ENSG00000058091	CDK14	-0.102218871	1
ENSG00000138395	CDK15	-0.407164622	0.839452475
ENSG00000102225	CDK16	-0.249447202	0.060132509
ENSG00000059758	CDK17	0.682386758	3.73E-05
ENSG00000117266	CDK18	-0.27367659	0.142874083
ENSG00000155111	CDK19	-0.52337516	0.009883777
ENSG00000123374	CDK2	-0.44441419	0.000488304
ENSG00000156345	CDK20	0.893603709	2.37E-09
ENSG00000111328	CDK2AP1	-0.196061192	0.332262979
ENSG00000167797	CDK2AP2	-0.769360766	4.40E-08
ENSG00000234299	CDK2AP2P1	-0.570000491	1
ENSG00000237451	CDK2AP2P2	0.050209305	1
ENSG00000226020	CDK2AP2P3	-0.317723273	1
ENSG00000250506	CDK3	-0.131219639	1
ENSG00000135446	CDK4	-0.138518216	0.588979217
ENSG00000164885	CDK5	-0.846919474	0.009352121
ENSG00000176749	CDK5R1	0.328034007	0.275829469
ENSG00000171450	CDK5R2	-1.259164524	0.000262015
ENSG00000101391	CDK5RAP1	0.615713524	7.65E-08
ENSG00000136861	CDK5RAP2	-0.220818708	0.218837805
ENSG00000108465	CDK5RAP3	0.190420919	0.340819606
ENSG00000105810	CDK6	0.194498868	0.247064248
ENSG00000134058	CDK7	0.647407685	8.74E-07
ENSG00000132964	CDK8	0.442300669	0.003081868
ENSG00000136807	CDK9	-0.149450977	0.596014661
ENSG00000145996	CDKAL1	-0.054478502	1
ENSG00000100490	CDKL1	0.822756689	1.02E-06
ENSG00000138769	CDKL2	0.471969948	1
ENSG00000006837	CDKL3	0.258703795	0.114853587
ENSG00000205111	CDKL4	0.126672036	1
ENSG00000008086	CDKL5	-0.128334051	1
ENSG00000124762	CDKN1A	0.042618887	1
ENSG00000111276	CDKN1B	-1.051686933	1.57E-08
ENSG00000129757	CDKN1C	-1.823196744	0.001755762
ENSG00000147889	CDKN2A	0	1
ENSG00000168564	CDKN2AIP	0.510312445	0.004074919
ENSG00000237190	CDKN2AIPNL	0.002561451	1
ENSG00000177770	CDKN2AIPNLP1	-0.107371927	1
ENSG00000145835	CDKN2AIPNLP2	0.468991345	1
ENSG00000224351	CDKN2AIPNLP3	0	1
ENSG00000147883	CDKN2B	-1.790042574	1
ENSG00000240498	CDKN2B-AS1	-0.045152516	1
ENSG00000123080	CDKN2C	-2.519541224	3.59E-40
ENSG00000129355	CDKN2D	-0.584008839	0.063229367
ENSG00000100526	CDKN3	-0.498903547	0.0004113
ENSG00000185267	CDNF	0.705356415	0.061426034
ENSG00000129596	CDO1	1.884584871	8.36E-10
ENSG00000064309	CDON	-0.177857962	0.93535007
ENSG00000205643	CDPF1	0.02810344	1
ENSG00000184258	CDR1	-0.440088971	1
ENSG00000140743	CDR2	0.70779183	3.80E-09
ENSG00000109089	CDR2L	0.130126186	0.783919238
ENSG00000241322	CDRT1	0.620178024	0.272324608
ENSG00000223510	CDRT15	-1.270072454	0.521224271
ENSG00000214819	CDRT15L2	0	1
ENSG00000141028	CDRT15P1	0.41528692	1
ENSG00000227255	CDRT15P2	0	1
ENSG00000239704	CDRT4	-0.22787423	0.693023355
ENSG00000259944	CDRT7	0	1
ENSG00000163624	CDS1	0.582320329	0.0153616
ENSG00000101290	CDS2	-0.788263719	1.41E-06
ENSG00000137197	CDSN	0	1
ENSG00000204539	CDSN	-1.681291171	0.0003777
ENSG00000206460	CDSN	0	1
ENSG00000237114	CDSN	0	1
ENSG00000237123	CDSN	0	1
ENSG00000237165	CDSN	0	1
ENSG00000167513	CDT1	-0.005679348	1
ENSG00000091527	CDV3	-0.016975118	1
ENSG00000176243	CDV3P1	-0.157967862	1
ENSG00000113722	CDX1	1.968064759	1
ENSG00000165556	CDX2	1.121348516	4.59E-06
ENSG00000131264	CDX4	0	1
ENSG00000172288	CDY1	0	1
ENSG00000226042	CDY10P	0	1
ENSG00000230029	CDY11P	0	1
ENSG00000228850	CDY12P	0	1
ENSG00000224873	CDY13P	0	1
ENSG00000226873	CDY14P	0	1
ENSG00000223362	CDY15P	0	1
ENSG00000231375	CDY17P	-1.790494539	1
ENSG00000232205	CDY18P	0	1
ENSG00000237823	CDY19P	0	1
ENSG00000172352	CDY1B	0	1
ENSG00000225609	CDY20P	0	1
ENSG00000229343	CDY22P	0	1
ENSG00000231716	CDY23P	0	1
ENSG00000182415	CDY2A	0	1
ENSG00000129873	CDY2B	0	1
ENSG00000232235	CDY3P	0	1
ENSG00000228411	CDY4P	-3.065584021	0.839452475
ENSG00000226449	CDY5P	0	1
ENSG00000229138	CDY6P	0	1
ENSG00000237558	CDY7P	-1.789943949	1
ENSG00000224033	CDY8P	0	1
ENSG00000232899	CDY9P	0	1
ENSG00000153046	CDYL	0.364800213	0.018000105
ENSG00000166446	CDYL2	-0.044828663	1
ENSG00000079385	CEACAM1	-0.24973421	1
ENSG00000213892	CEACAM16	-0.96013732	1
ENSG00000213822	CEACAM18	0	1
ENSG00000186567	CEACAM19	0.34962051	0.012133341
ENSG00000176395	CEACAM20	-0.962252137	1
ENSG00000007129	CEACAM21	-0.24216215	1
ENSG00000230666	CEACAM22P	-0.198001528	1
ENSG00000170956	CEACAM3	2.77133639	1
ENSG00000105352	CEACAM4	1.968064759	1
ENSG00000105388	CEACAM5	0.206377981	1
ENSG00000086548	CEACAM6	0.89272895	1
ENSG00000007306	CEACAM7	0.178404576	1
ENSG00000124469	CEACAM8	3.284072842	0.839452475
ENSG00000233681	CEACAMP1	0.981244876	1
ENSG00000241104	CEACAMP10	0.416739585	1
ENSG00000236123	CEACAMP11	-1.906075272	0.333043958
ENSG00000230558	CEACAMP2	0	1
ENSG00000239736	CEACAMP3	0	1
ENSG00000230681	CEACAMP4	1.968408083	1
ENSG00000231561	CEACAMP5	-1.097617462	1
ENSG00000238092	CEACAMP6	-1.790042574	1
ENSG00000227349	CEACAMP7	0	1
ENSG00000236932	CEACAMP8	-0.962349993	1
ENSG00000230529	CEACAMP9	1.968899115	1
ENSG00000245848	CEBPA	0	1
ENSG00000178863	CEBPA-AS1	0	1
ENSG00000172216	CEBPB	0.252418174	0.149515329
ENSG00000221869	CEBPD	0.832500137	0.001571678
ENSG00000092067	CEBPE	0	1
ENSG00000153879	CEBPG	0.469944045	0.000545355
ENSG00000115816	CEBPZ	0.418648369	0.00024952
ENSG00000093072	CECR1	0.174636911	1
ENSG00000099954	CECR2	0.822022648	7.56E-11
ENSG00000241832	CECR3	1.968064759	1
ENSG00000069998	CECR5	0.451927732	0.000114957
ENSG00000185837	CECR5-AS1	-0.709142748	1
ENSG00000183307	CECR6	0.23680728	1
ENSG00000237438	CECR7	0.405882439	0.011103571
ENSG00000231004	CECR9	0	1
ENSG00000170835	CEL	-0.167701071	1
ENSG00000139610	CELA1	0.894507098	1
ENSG00000142615	CELA2A	0.595811686	1
ENSG00000215704	CELA2B	-0.565987743	1
ENSG00000142789	CELA3A	0.980803646	1
ENSG00000219073	CELA3B	1.297512172	0.28922182
ENSG00000149187	CELF1	0.328110352	0.005444457
ENSG00000048740	CELF2	-0.667763197	0.021171792
ENSG00000181800	CELF2-AS1	-0.277211972	1
ENSG00000237986	CELF2-AS2	0	1
ENSG00000159409	CELF3	-0.258133256	1
ENSG00000101489	CELF4	1.163963836	0.030533787
ENSG00000161082	CELF5	0.333254452	1
ENSG00000140488	CELF6	-0.114227116	1
ENSG00000170827	CELP	-1.906668249	0.333043958
ENSG00000075275	CELSR1	0.684598699	0.011995797
ENSG00000143126	CELSR2	-0.28480311	0.07138628
ENSG00000008300	CELSR3	0.030868549	1
ENSG00000205923	CEMP1	0.11402933	0.951966136
ENSG00000184524	CEND1	0.223006314	1
ENSG00000213159	CEND1P1	0	1
ENSG00000115163	CENPA	-0.297550456	0.019298343
ENSG00000125817	CENPB	-0.196878102	0.290731841
ENSG00000177946	CENPBD1	-0.028502517	1
ENSG00000145241	CENPC1	-0.302489151	0.348078945
ENSG00000226982	CENPC1P1	-0.442130824	0.512752428
ENSG00000138778	CENPE	-0.412811809	0.001630466
ENSG00000117724	CENPF	-0.585786829	2.64E-08
ENSG00000153044	CENPH	-0.18182956	0.676079243
ENSG00000102384	CENPI	-1.48749505	4.55E-19
ENSG00000224778	CENPIP1	-0.083760603	1
ENSG00000151849	CENPJ	-0.040753171	1
ENSG00000123219	CENPK	-0.42136693	0.057729521
ENSG00000120334	CENPL	0.059272667	1
ENSG00000100162	CENPM	-0.523327574	0.000310795
ENSG00000166451	CENPN	-0.088708021	1
ENSG00000138092	CENPO	-0.011018475	1
ENSG00000188312	CENPP	0.422953421	0.002618197
ENSG00000031691	CENPQ	-0.147549953	1
ENSG00000102901	CENPT	0.197582971	0.248645408
ENSG00000166582	CENPV	1.118785423	1.08E-15
ENSG00000223591	CENPVP1	0.769721678	0.151492361
ENSG00000227997	CENPVP2	0.094108038	1
ENSG00000224109	CENPVP3	-0.026876608	1
ENSG00000203760	CENPW	-0.110286556	1
ENSG00000116198	CEP104	0.391974703	0.029972864
ENSG00000154240	CEP112	-0.276335757	0.06605529
ENSG00000168944	CEP120	0.058152321	1
ENSG00000100629	CEP128	-0.105362587	1
ENSG00000174799	CEP135	-0.126824902	0.870608089
ENSG00000103995	CEP152	0.0758908	1
ENSG00000110274	CEP164	0.126977691	0.805616353
ENSG00000226937	CEP164P1	0.075420807	1
ENSG00000143702	CEP170	0.235001107	0.332541424
ENSG00000099814	CEP170B	0.329931961	0.010919206
ENSG00000154608	CEP170P1	0.150278319	0.959642005
ENSG00000174007	CEP19	-0.064135803	1
ENSG00000101639	CEP192	-0.591809424	4.04E-06
ENSG00000126001	CEP250	-0.684568488	4.00E-10
ENSG00000198707	CEP290	0.235805002	0.59756793
ENSG00000135837	CEP350	-0.20656556	0.329887178
ENSG00000106477	CEP41	-0.512393528	0.111249458
ENSG00000164118	CEP44	-0.251816808	0.61439424
ENSG00000138180	CEP55	-0.999572805	2.48E-20
ENSG00000166037	CEP57	-0.579728157	0.000598738
ENSG00000183137	CEP57L1	-0.52460503	0.161074513
ENSG00000224725	CEP57L1P1	-1.102679252	0.139833432
ENSG00000182923	CEP63	0.081622151	1
ENSG00000011523	CEP68	0.153989588	0.914888508
ENSG00000114107	CEP70	-1.202572621	1.57E-10
ENSG00000112877	CEP72	0.340591744	0.008185285
ENSG00000101624	CEP76	0.310803849	0.152611394
ENSG00000148019	CEP78	-0.502622399	0.000984452
ENSG00000130695	CEP85	0.395149873	0.001802153
ENSG00000111860	CEP85L	0.537799706	0.015954746
ENSG00000121289	CEP89	-0.000617489	1
ENSG00000258890	CEP95	0.547906503	2.03E-05
ENSG00000182504	CEP97	-0.22609149	0.381887429
ENSG00000134255	CEPT1	0.029841989	1
ENSG00000147869	CER1	0	1
ENSG00000167123	CERCAM	-0.431694374	0.015540372
ENSG00000100422	CERK	-0.637328218	5.26E-07
ENSG00000188452	CERKL	0.408130732	0.59527155
ENSG00000223802	CERS1	1.336285787	1.23E-12
ENSG00000143418	CERS2	0.077121909	1
ENSG00000154227	CERS3	0.105825718	1
ENSG00000090661	CERS4	-0.15013933	1
ENSG00000139624	CERS5	-0.263122206	0.252819862
ENSG00000172292	CERS6	0.845491271	6.32E-13
ENSG00000227617	CERS6-AS1	0.689767959	9.05E-05
ENSG00000198848	CES1	0.241423947	1
ENSG00000228695	CES1P1	-0.664390234	0.883150025
ENSG00000172831	CES2	0.014448589	1
ENSG00000172828	CES3	-1.371332103	0.002309515
ENSG00000172824	CES4A	-1.016063892	0.881088702
ENSG00000159398	CES5A	-0.915177672	0.566605329
ENSG00000215478	CES5AP1	-1.790042574	1
ENSG00000177143	CETN1	0	1
ENSG00000147400	CETN2	-0.315546365	0.158863589
ENSG00000153140	CETN3	-0.674776113	0.00605119
ENSG00000224786	CETN4P	0.17885654	1
ENSG00000087237	CETP	-0.791575602	0.63617394
ENSG00000204359	CFB	0	1
ENSG00000239754	CFB	0	1
ENSG00000241253	CFB	0	1
ENSG00000241534	CFB	0	1
ENSG00000242335	CFB	0	1
ENSG00000243570	CFB	0	1
ENSG00000243649	CFB	-0.339619211	0.600389458
ENSG00000136698	CFC1	0	1
ENSG00000152093	CFC1B	0	1
ENSG00000197766	CFD	-1.373251741	0.000132063
ENSG00000153774	CFDP1	0.251596956	0.224782141
ENSG00000000971	CFH	-0.38919232	1
ENSG00000244414	CFHR1	0	1
ENSG00000080910	CFHR2	0.173382173	1
ENSG00000116785	CFHR3	-1.646807485	0.305843913
ENSG00000134365	CFHR4	0.383718509	1
ENSG00000134389	CFHR5	0.217254364	1
ENSG00000205403	CFI	0.544336694	1
ENSG00000172757	CFL1	-0.27654804	0.018154353
ENSG00000223820	CFL1P1	0.45264926	0.249415248
ENSG00000213478	CFL1P2	-0.203887741	0.277173054
ENSG00000228056	CFL1P3	-0.690734961	0.010157589
ENSG00000213026	CFL1P4	-0.169539622	0.723945388
ENSG00000213830	CFL1P5	-0.359707369	0.092878686
ENSG00000215785	CFL1P6	-0.666705523	1
ENSG00000213877	CFL1P7	-0.224471136	1
ENSG00000234239	CFL1P8	-0.962007469	1
ENSG00000165410	CFL2	-0.52438354	3.25E-05
ENSG00000003402	CFLAR	0.182980837	0.422936739
ENSG00000226312	CFLAR-AS1	0.561089517	0.119441502
ENSG00000126759	CFP	-0.094257147	1
ENSG00000001626	CFTR	-0.406426889	1
ENSG00000228593	CFTRP1	0	1
ENSG00000135346	CGA	0.17812081	1
ENSG00000104827	CGB	-0.065648846	1
ENSG00000267631	CGB1	-0.315213341	0.440154485
ENSG00000104818	CGB2	-0.236464439	1
ENSG00000189052	CGB5	-0.555842192	0.229368327
ENSG00000196337	CGB7	0.261669929	0.882610415
ENSG00000213030	CGB8	-0.354561108	1
ENSG00000163320	CGGBP1	-0.233864049	0.137173155
ENSG00000143375	CGN	-0.329660967	0.053341614
ENSG00000128849	CGNL1	-1.018991547	1.25E-05
ENSG00000138028	CGREF1	0.278246551	0.185143005
ENSG00000100532	CGRRF1	0.282965441	0.56157089
ENSG00000138135	CH25H	1.968064759	1
ENSG00000128965	CHAC1	1.238347581	9.78E-11
ENSG00000143942	CHAC2	0.236953951	0.594723711
ENSG00000136457	CHAD	-2.320009717	0.000100811
ENSG00000100399	CHADL	0.034752853	1
ENSG00000167670	CHAF1A	-0.117334169	0.879835923
ENSG00000159259	CHAF1B	-0.338177206	0.080001844
ENSG00000198824	CHAMP1	-0.183010945	0.560149044
ENSG00000070748	CHAT	-0.381490496	1
ENSG00000172586	CHCHD1	0.037471256	1
ENSG00000250479	CHCHD10	0	1
ENSG00000106153	CHCHD2	0.011064838	1
ENSG00000226902	CHCHD2P1	-1.790494539	1
ENSG00000215006	CHCHD2P2	0.014733306	1
ENSG00000213118	CHCHD2P4	0.206671321	1
ENSG00000223490	CHCHD2P5	0	1
ENSG00000235084	CHCHD2P6	-0.071031277	1
ENSG00000249973	CHCHD2P7	0.80051238	0.87943317
ENSG00000235115	CHCHD2P8	0.04010364	1
ENSG00000186940	CHCHD2P9	0.152897557	0.964264594
ENSG00000106554	CHCHD3	-0.098326698	0.881691992
ENSG00000236420	CHCHD3P1	0.09712986	1
ENSG00000257723	CHCHD3P2	0.980902271	1
ENSG00000214973	CHCHD3P3	0.335926582	0.336051716
ENSG00000163528	CHCHD4	0.332840125	0.115210045
ENSG00000237360	CHCHD4P2	1.968064759	1
ENSG00000236156	CHCHD4P3	-0.033876264	1
ENSG00000213964	CHCHD4P4	0.28763229	1
ENSG00000225222	CHCHD4P5	0	1
ENSG00000125611	CHCHD5	-0.342617606	0.158400353
ENSG00000159685	CHCHD6	0.73389274	2.95E-08
ENSG00000170791	CHCHD7	0.346270253	0.050488264
ENSG00000153922	CHD1	0.310030723	0.030687667
ENSG00000131778	CHD1L	0.029084917	1
ENSG00000173575	CHD2	-0.063877158	1
ENSG00000170004	CHD3	-0.492898981	2.69E-06
ENSG00000111642	CHD4	-0.021376818	1
ENSG00000116254	CHD5	0.172192291	0.873295
ENSG00000124177	CHD6	-0.253335001	0.171043271
ENSG00000171316	CHD7	0.857235392	2.67E-16
ENSG00000100888	CHD8	0.08592972	1
ENSG00000177200	CHD9	0.195882533	0.489909066
ENSG00000176034	CHDC2	-1.097331694	1
ENSG00000016391	CHDH	0.425382602	0.452245783
ENSG00000149554	CHEK1	-0.229203915	0.327840726
ENSG00000183765	CHEK2	-0.4381006	0.05553546
ENSG00000259156	CHEK2P2	-0.421796127	1
ENSG00000234898	CHEK2P3	0.71950619	1
ENSG00000235969	CHEK2P4	-0.294943747	1
ENSG00000234541	CHEK2P5	-0.294493395	1
ENSG00000085872	CHERP	0.354638301	0.00346736
ENSG00000072609	CHFR	0.339136358	0.099964132
ENSG00000100604	CHGA	0.207701322	1
ENSG00000089199	CHGB	-0.713559776	0.404191898
ENSG00000133048	CHI3L1	-1.084945921	1
ENSG00000064886	CHI3L2	-1.437186304	0.005071087
ENSG00000134216	CHIA	1.968408083	1
ENSG00000236040	CHIAP1	0	1
ENSG00000203878	CHIAP2	0	1
ENSG00000234020	CHIAP3	0.063490137	1
ENSG00000204116	CHIC1	-0.327015657	0.271874726
ENSG00000109220	CHIC2	0.572461003	7.09E-06
ENSG00000177830	CHID1	0.162420858	0.490834912
ENSG00000133063	CHIT1	-0.051357844	1
ENSG00000110721	CHKA	0.462245649	0.001788148
ENSG00000100288	CHKB	-0.196686155	0.541443038
ENSG00000254413	CHKB-CPT1B	-0.114230861	0.922847702
ENSG00000134121	CHL1	-0.113445211	1
ENSG00000234661	CHL1-AS1	-1.790042574	1
ENSG00000224318	CHL1-AS2	-1.789943949	1
ENSG00000188419	CHM	-0.236521316	0.488772154
ENSG00000203668	CHML	-0.313270711	0.053845234
ENSG00000131165	CHMP1A	0.186386527	0.340232968
ENSG00000226662	CHMP1AP1	0.685447858	1
ENSG00000255112	CHMP1B	0.33465452	0.117139941
ENSG00000130724	CHMP2A	-0.086599509	1
ENSG00000083937	CHMP2B	0.225079787	0.400802842
ENSG00000115561	CHMP3	-0.035740652	1
ENSG00000254505	CHMP4A	-0.285077141	0.243353195
ENSG00000101421	CHMP4B	0.177283337	0.349096931
ENSG00000258469	CHMP4BP1	0.177193708	0.857931577
ENSG00000164695	CHMP4C	0.525304699	0.01445697
ENSG00000086065	CHMP5	0.013524636	1
ENSG00000176108	CHMP6	-0.057645046	1
ENSG00000147457	CHMP7	0.007150103	1
ENSG00000128656	CHN1	-1.108803159	0.000714909
ENSG00000106069	CHN2	0.57983995	0.752121179
ENSG00000154645	CHODL	0.289467797	1
ENSG00000231755	CHODL-AS1	-1.415252593	0.922847702
ENSG00000110172	CHORDC1	0.238394745	0.179359052
ENSG00000259050	CHORDC2P	0.526211009	0.462656324
ENSG00000187446	CHP1	-0.285719873	0.065227214
ENSG00000166869	CHP2	-0.477096803	1
ENSG00000123989	CHPF	-0.110852132	0.864203596
ENSG00000033100	CHPF2	-0.361902018	0.091241642
ENSG00000111666	CHPT1	0.320400326	0.12922096
ENSG00000104472	CHRAC1	-0.151663007	0.581873037
ENSG00000090539	CHRD	-1.639776453	1.37E-07
ENSG00000101938	CHRDL1	0.290252453	0.423138125
ENSG00000054938	CHRDL2	-0.329396505	1
ENSG00000166664	CHRFAM7A	0.063800805	1
ENSG00000168539	CHRM1	-1.76379331	1
ENSG00000181072	CHRM2	0.238224458	1
ENSG00000133019	CHRM3	0.173772726	1
ENSG00000234601	CHRM3-AS1	0	1
ENSG00000233355	CHRM3-AS2	-1.096783106	1
ENSG00000180720	CHRM4	0.160196376	1
ENSG00000184984	CHRM5	0.279961552	1
ENSG00000138435	CHRNA1	1.353378306	0.803565461
ENSG00000129749	CHRNA10	0.243088625	1
ENSG00000120903	CHRNA2	0.439665047	1
ENSG00000080644	CHRNA3	-0.11540999	1
ENSG00000101204	CHRNA4	0.576312583	3.88E-05
ENSG00000169684	CHRNA5	0.722117708	1.62E-05
ENSG00000147434	CHRNA6	0.37715563	1
ENSG00000175344	CHRNA7	0.321532794	0.383813573
ENSG00000174343	CHRNA9	1.062043724	2.20E-09
ENSG00000170175	CHRNB1	-0.156917307	0.886456032
ENSG00000160716	CHRNB2	1.929512676	7.19E-05
ENSG00000147432	CHRNB3	0.110287748	1
ENSG00000117971	CHRNB4	0.302063493	0.126165527
ENSG00000135902	CHRND	-2.56446824	1
ENSG00000108556	CHRNE	0.093585579	1
ENSG00000196811	CHRNG	2.169564604	0.783919238
ENSG00000175264	CHST1	-1.398414578	1.43E-11
ENSG00000115526	CHST10	0.32731854	0.025537846
ENSG00000171310	CHST11	0.20800586	0.50399573
ENSG00000136213	CHST12	-0.027557765	1
ENSG00000180767	CHST13	-0.153830614	1
ENSG00000169105	CHST14	-0.366683568	0.082941324
ENSG00000182022	CHST15	0.980749984	1
ENSG00000175040	CHST2	-0.223730916	0.530426505
ENSG00000122863	CHST3	-0.175285729	0.339217642
ENSG00000140835	CHST4	-0.202101703	0.938300213
ENSG00000135702	CHST5	0.650337988	0.63642963
ENSG00000183196	CHST6	-0.168977356	0.828958533
ENSG00000147119	CHST7	-0.036258996	1
ENSG00000124302	CHST8	-0.068590363	1
ENSG00000154080	CHST9	0.063634547	1
ENSG00000131873	CHSY1	0.276521151	0.091494991
ENSG00000198108	CHSY3	0.275582634	0.148392444
ENSG00000127586	CHTF18	-0.300424366	0.041991952
ENSG00000168802	CHTF8	-0.314696131	0.017523777
ENSG00000233543	CHTF8P1	-0.4716587	0.251615787
ENSG00000160679	CHTOP	0.042366289	1
ENSG00000213341	CHUK	0.40863593	0.004720308
ENSG00000258289	CHURC1	-0.25299309	0.206161954
ENSG00000125954	CHURC1-FNTB	-0.204099852	0.185241829
ENSG00000144021	CIAO1	-0.025240358	1
ENSG00000005194	CIAPIN1	0.279846468	0.071801884
ENSG00000263846	CIAPIN1P	0.130743792	1
ENSG00000185043	CIB1	0.130922639	0.757502822
ENSG00000136425	CIB2	-0.507183252	0.071758929
ENSG00000141977	CIB3	0.474835969	1
ENSG00000157884	CIB4	0.475530206	1
ENSG00000079432	CIC	-0.753489113	1.50E-12
ENSG00000233652	CICP1	0.370934473	1
ENSG00000224160	CICP10	0	1
ENSG00000237799	CICP11	1.034893789	0.688581822
ENSG00000225270	CICP12	-1.790042574	1
ENSG00000234419	CICP13	0.676857487	1
ENSG00000248213	CICP16	0.475810646	1
ENSG00000233740	CICP2	1.095062566	1
ENSG00000229376	CICP3	0.771248459	1
ENSG00000232852	CICP4	0.238756856	1
ENSG00000233771	CICP5	1.314227746	0.37811862
ENSG00000230304	CICP6	-0.218549747	1
ENSG00000233653	CICP7	0.524161376	1
ENSG00000225371	CICP8	1.871586422	1
ENSG00000228882	CICP9	0.490613514	1
ENSG00000176194	CIDEA	0.522187795	1
ENSG00000136305	CIDEB	0.555141853	3.36E-06
ENSG00000187288	CIDEC	0.673792198	0.659332583
ENSG00000186162	CIDECP	0.528713242	0.011861586
ENSG00000179583	CIITA	0.185297812	1
ENSG00000138615	CILP	-0.294737801	1
ENSG00000160161	CILP2	0.363844353	0.74414794
ENSG00000100865	CINP	0.107197745	1
ENSG00000138433	CIR1	0.367481151	0.164388685
ENSG00000253146	CIR1P1	1.557107943	0.042726469
ENSG00000250215	CIR1P2	0.604346549	1
ENSG00000216708	CIR1P3	0.521555782	1
ENSG00000099622	CIRBP	-0.316202726	0.057090675
ENSG00000267493	CIRBP-AS1	-0.145497328	1
ENSG00000141076	CIRH1A	0.465523832	2.62E-05
ENSG00000122873	CISD1	-0.050985548	1
ENSG00000213403	CISD1P1	-0.445145937	0.657112241
ENSG00000145354	CISD2	-0.116058634	1
ENSG00000230055	CISD3	-0.247635553	0.213705668
ENSG00000114737	CISH	0.696549216	0.015250275
ENSG00000122966	CIT	-0.967469104	5.97E-20
ENSG00000125931	CITED1	0.628770058	0.402519286
ENSG00000164442	CITED2	-0.271884811	0.211722191
ENSG00000179862	CITED4	0	1
ENSG00000148337	CIZ1	-0.232883699	0.126355902
ENSG00000136108	CKAP2	-0.636642648	1.49E-07
ENSG00000169607	CKAP2L	-1.052357538	2.47E-18
ENSG00000136026	CKAP4	-0.624664062	4.08E-09
ENSG00000175216	CKAP5	0.030481413	1
ENSG00000166165	CKB	-0.553289432	0.006929415
ENSG00000260889	CKBP1	0	1
ENSG00000217555	CKLF	-0.396452779	0.005586635
ENSG00000254788	CKLF-CMTM1	-0.38245338	0.004277772
ENSG00000104879	CKM	2.038310059	0.488772154
ENSG00000223572	CKMT1A	-0.054359918	1
ENSG00000237289	CKMT1B	0.207427921	0.912486332
ENSG00000131730	CKMT2	-0.408149795	0.057332007
ENSG00000173207	CKS1B	0.080912211	1
ENSG00000250972	CKS1BP5	-0.448029361	1
ENSG00000178556	CKS1BP6	0.159749212	1
ENSG00000254331	CKS1BP7	-0.159777917	1
ENSG00000123975	CKS2	-0.100649294	0.977735715
ENSG00000074054	CLASP1	-0.150371579	0.530426505
ENSG00000163539	CLASP2	0.342350041	0.021155719
ENSG00000104859	CLASRP	0.348799037	0.014634396
ENSG00000105205	CLC	2.771679111	1
ENSG00000016490	CLCA1	-1.790042574	1
ENSG00000137975	CLCA2	-0.276778142	1
ENSG00000153923	CLCA3P	0.719055034	1
ENSG00000016602	CLCA4	-0.914797564	0.778949515
ENSG00000121940	CLCC1	-0.482350836	0.000212407
ENSG00000175505	CLCF1	-0.454540249	0.008954212
ENSG00000188037	CLCN1	0.522735612	1
ENSG00000114859	CLCN2	1.130297701	9.31E-17
ENSG00000109572	CLCN3	-0.426603967	0.00082958
ENSG00000073464	CLCN4	-0.23810766	0.437231132
ENSG00000171365	CLCN5	-0.035252298	1
ENSG00000011021	CLCN6	0.129912911	0.861923606
ENSG00000103249	CLCN7	0.46938651	1.80E-05
ENSG00000186510	CLCNKA	-1.639665282	0.094992718
ENSG00000184908	CLCNKB	1.39590167	1
ENSG00000232305	CLCP1	0	1
ENSG00000226158	CLCP2	1.968064759	1
ENSG00000163347	CLDN1	-0.585015848	0.107951894
ENSG00000134873	CLDN10	0.918116771	0.24410566
ENSG00000223392	CLDN10-AS1	1.033894072	0.688581822
ENSG00000013297	CLDN11	-0.381488795	0.015511828
ENSG00000157224	CLDN12	0.345786492	0.009807053
ENSG00000159261	CLDN14	-0.23665934	0.412695755
ENSG00000106404	CLDN15	0.341060735	0.053943653
ENSG00000113946	CLDN16	0.235654086	1
ENSG00000156282	CLDN17	-0.596256987	1
ENSG00000066405	CLDN18	-0.913582396	0.229306547
ENSG00000164007	CLDN19	0.178404576	1
ENSG00000165376	CLDN2	-0.44967922	1
ENSG00000171217	CLDN20	-0.409616143	1
ENSG00000177300	CLDN22	1.010938078	0.018790448
ENSG00000253958	CLDN23	-2.56446824	1
ENSG00000185758	CLDN24	0.981427929	1
ENSG00000228607	CLDN25	0	1
ENSG00000165215	CLDN3	-1.763758869	0.783919238
ENSG00000189143	CLDN4	-2.331265264	8.39E-44
ENSG00000184113	CLDN5	-0.963245849	0.02014563
ENSG00000184697	CLDN6	-0.529215482	1
ENSG00000181885	CLDN7	-0.869725084	1
ENSG00000156284	CLDN8	0	1
ENSG00000213937	CLDN9	1.968899115	1
ENSG00000080822	CLDND1	-0.193329031	0.329596286
ENSG00000160318	CLDND2	0.195685174	1
ENSG00000132514	CLEC10A	0	1
ENSG00000105472	CLEC11A	-0.28627545	0.131025895
ENSG00000172322	CLEC12A	0.126387292	1
ENSG00000256660	CLEC12B	-1.790494539	1
ENSG00000176435	CLEC14A	0	1
ENSG00000038532	CLEC16A	0.099041599	1
ENSG00000187912	CLEC17A	-1.016221659	1
ENSG00000157322	CLEC18A	-0.130316772	1
ENSG00000140839	CLEC18B	-0.166286822	1
ENSG00000157335	CLEC18C	0.398445437	1
ENSG00000261210	CLEC19A	-0.448176863	1
ENSG00000150048	CLEC1A	-0.524374679	1
ENSG00000165682	CLEC1B	0.17812081	1
ENSG00000188393	CLEC2A	-1.598507121	0.688581822
ENSG00000110852	CLEC2B	-0.909356063	0.001684337
ENSG00000069493	CLEC2D	-0.007995975	1
ENSG00000236279	CLEC2L	-0.143383457	0.818717648
ENSG00000166509	CLEC3A	0.290299321	1
ENSG00000163815	CLEC3B	0.560711211	9.69E-05
ENSG00000111729	CLEC4A	-0.257160274	1
ENSG00000198178	CLEC4C	1.166197799	0.881088702
ENSG00000166527	CLEC4D	-0.410808029	0.268737572
ENSG00000166523	CLEC4E	0.206377981	1
ENSG00000152672	CLEC4F	-0.288040737	1
ENSG00000182566	CLEC4G	0	1
ENSG00000268297	CLEC4GP1	0	1
ENSG00000104938	CLEC4M	0.397572492	1
ENSG00000258227	CLEC5A	-1.790042574	1
ENSG00000205846	CLEC6A	-0.277910522	0.56157089
ENSG00000172243	CLEC7A	-1.268155442	0.775383817
ENSG00000197992	CLEC9A	1.494128893	1
ENSG00000184293	CLECL1	3.283730918	0.839452475
ENSG00000153132	CLGN	-0.823004226	0.175370725
ENSG00000162994	CLHC1	0.090068415	1
ENSG00000206394	CLIC1	0	1
ENSG00000213719	CLIC1	-0.276138356	0.022585446
ENSG00000223639	CLIC1	0	1
ENSG00000226248	CLIC1	0	1
ENSG00000226417	CLIC1	0	1
ENSG00000226651	CLIC1	0	1
ENSG00000230685	CLIC1	0	1
ENSG00000231313	CLIC1P1	-0.246744243	0.248684021
ENSG00000155962	CLIC2	0.037213896	1
ENSG00000169583	CLIC3	-1.196669806	0.216165772
ENSG00000169504	CLIC4	-0.760402921	7.76E-14
ENSG00000112782	CLIC5	0.452755899	1
ENSG00000159212	CLIC6	0.17812081	1
ENSG00000113282	CLINT1	0.449434297	0.000123938
ENSG00000130779	CLIP1	0.006560242	1
ENSG00000106665	CLIP2	-0.883017758	2.00E-13
ENSG00000105270	CLIP3	-1.250360796	1.56E-22
ENSG00000115295	CLIP4	-0.16633808	0.403220045
ENSG00000013441	CLK1	0.193095783	0.592353985
ENSG00000176444	CLK2	-0.209518919	0.305376466
ENSG00000179335	CLK3	0.452174505	0.000155742
ENSG00000113240	CLK4	0.18579528	0.944318859
ENSG00000257127	CLLU1	-1.789943949	1
ENSG00000205057	CLLU1OS	-1.789943949	1
ENSG00000165959	CLMN	0.731565774	0.000878695
ENSG00000166250	CLMP	0.12064621	1
ENSG00000188603	CLN3	-0.221481548	0.480891277
ENSG00000102805	CLN5	-0.516003079	0.240065254
ENSG00000128973	CLN6	0.388114778	0.000881994
ENSG00000182372	CLN8	0.306446398	0.22088741
ENSG00000109684	CLNK	0.540512022	0.872282548
ENSG00000074201	CLNS1A	0.14944315	0.558359329
ENSG00000213335	CLNS1AP1	-0.128465792	1
ENSG00000134852	CLOCK	-0.325893104	0.009623562
ENSG00000172409	CLP1	0.163504596	0.616357934
ENSG00000162129	CLPB	0.346232652	0.012882223
ENSG00000125656	CLPP	0.512865848	6.38E-05
ENSG00000137392	CLPS	0	1
ENSG00000204140	CLPSL1	0.595118329	1
ENSG00000196748	CLPSL2	-0.315393867	1
ENSG00000104853	CLPTM1	-0.069009171	1
ENSG00000049656	CLPTM1L	0.258664464	0.034639283
ENSG00000166855	CLPX	0.45206621	0.000327944
ENSG00000163646	CLRN1	1.395380657	1
ENSG00000239265	CLRN1-AS1	0.329836579	1
ENSG00000249581	CLRN2	3.283730918	0.839452475
ENSG00000180745	CLRN3	-1.790042574	1
ENSG00000092853	CLSPN	-0.455021832	0.00052417
ENSG00000171603	CLSTN1	-0.453522164	2.10E-05
ENSG00000158258	CLSTN2	-0.484286901	0.784135485
ENSG00000139182	CLSTN3	-1.011516384	1.35E-20
ENSG00000122705	CLTA	-0.235212311	0.08201367
ENSG00000175416	CLTB	0.215571794	0.201183332
ENSG00000141367	CLTC	-0.315663788	0.004723998
ENSG00000070371	CLTCL1	-0.340205861	0.033506319
ENSG00000120885	CLU	-0.25719613	0.045304629
ENSG00000103351	CLUAP1	0.272785782	0.293381735
ENSG00000132361	CLUH	0.78347623	6.56E-16
ENSG00000238191	CLUHP1	-3.437355675	0.530426505
ENSG00000228945	CLUHP2	-1.789943949	1
ENSG00000131797	CLUHP3	0.48705767	0.012474339
ENSG00000249003	CLUHP4	1.731027104	0.141069952
ENSG00000230468	CLUHP5	1.436347845	0.272170359
ENSG00000079101	CLUL1	0.012455187	1
ENSG00000177182	CLVS1	0.087765234	1
ENSG00000146352	CLVS2	-0.504714854	0.982476131
ENSG00000125246	CLYBL	0.237373156	1
ENSG00000234303	CLYBL-AS1	0	1
ENSG00000227659	CLYBL-AS2	0	1
ENSG00000233731	CLYBL-IT1	0	1
ENSG00000092009	CMA1	1.968064759	1
ENSG00000168405	CMAHP	0.045749705	1
ENSG00000111726	CMAS	-0.334353727	0.064113369
ENSG00000164237	CMBL	0.308625871	0.383560905
ENSG00000187118	CMC1	-0.130402234	1
ENSG00000103121	CMC2	-0.058774081	1
ENSG00000182712	CMC4	-0.26487975	0.530426505
ENSG00000153815	CMIP	0.184353247	0.374664575
ENSG00000174600	CMKLR1	1.968064759	1
ENSG00000162368	CMPK1	-0.155937483	0.550071802
ENSG00000134326	CMPK2	-0.738192886	0.788373046
ENSG00000184220	CMSS1	0.171554409	0.393242452
ENSG00000089505	CMTM1	-0.299882058	0.232539429
ENSG00000140932	CMTM2	1.165833545	0.881088702
ENSG00000140931	CMTM3	-0.458803823	0.000239655
ENSG00000183723	CMTM4	-0.714481161	7.43E-07
ENSG00000166091	CMTM5	0	1
ENSG00000091317	CMTM6	-0.082863717	1
ENSG00000153551	CMTM7	0.238544821	0.137324602
ENSG00000170293	CMTM8	0.414379505	0.039477475
ENSG00000164309	CMYA5	0.047759996	1
ENSG00000176571	CNBD1	-0.023834543	1
ENSG00000149646	CNBD2	0.898131466	0.283246965
ENSG00000169714	CNBP	0.272297714	0.027786283
ENSG00000150656	CNDP1	0.798441562	0.87943317
ENSG00000133313	CNDP2	0.163020886	0.482780723
ENSG00000205423	CNEP1R1	-0.320816349	0.258446808
ENSG00000105427	CNFN	-0.308039488	1
ENSG00000198515	CNGA1	0.426253724	1
ENSG00000183862	CNGA2	0	1
ENSG00000144191	CNGA3	0.522357082	1
ENSG00000132259	CNGA4	-0.595569125	1
ENSG00000070729	CNGB1	0.190384312	1
ENSG00000170289	CNGB3	0.103019491	0.971634155
ENSG00000100528	CNIH	0.032186609	1
ENSG00000174871	CNIH2	-0.109404814	1
ENSG00000143786	CNIH3	0.051761888	1
ENSG00000143771	CNIH4	-0.153506268	0.844009545
ENSG00000142675	CNKSR1	0.376893823	0.222032584
ENSG00000149970	CNKSR2	0.162989939	1
ENSG00000153721	CNKSR3	1.282601556	2.60E-16
ENSG00000130176	CNN1	-0.898345686	3.27E-11
ENSG00000064666	CNN2	-0.776841658	2.68E-13
ENSG00000227201	CNN2P1	-1.278122422	0.005713234
ENSG00000232223	CNN2P10	0.217733515	1
ENSG00000237383	CNN2P11	1.968899115	1
ENSG00000204718	CNN2P12	-0.469021578	1
ENSG00000227069	CNN2P2	-0.915879743	0.570104884
ENSG00000235832	CNN2P3	-0.667605221	1
ENSG00000213816	CNN2P4	-0.722414899	1
ENSG00000233414	CNN2P5	-0.015439116	1
ENSG00000213854	CNN2P6	-2.061704404	0.001998584
ENSG00000215562	CNN2P7	-0.621781423	1
ENSG00000213355	CNN2P8	-2.805506247	0.005332893
ENSG00000213149	CNN2P9	-0.277633257	1
ENSG00000117519	CNN3	-0.639519276	1.56E-09
ENSG00000218868	CNN3P1	-0.453748448	0.597492478
ENSG00000119946	CNNM1	0.69651343	0.922847702
ENSG00000148842	CNNM2	0.670218959	9.30E-06
ENSG00000168763	CNNM3	0.466795899	0.000100016
ENSG00000158158	CNNM4	0.218979402	0.333524026
ENSG00000125107	CNOT1	0.01300823	1
ENSG00000182973	CNOT10	0.170406164	0.575982627
ENSG00000251224	CNOT10-AS1	0.279723896	0.779530814
ENSG00000158435	CNOT11	-0.155533435	0.620763499
ENSG00000111596	CNOT2	-0.04661943	1
ENSG00000088038	CNOT3	-0.004672157	1
ENSG00000080802	CNOT4	0.176686823	0.698136282
ENSG00000236704	CNOT4P1	0	1
ENSG00000113300	CNOT6	-0.150703676	0.641028512
ENSG00000138767	CNOT6L	0.340620514	0.074562654
ENSG00000230183	CNOT6LP1	0.777230326	0.008151445
ENSG00000198791	CNOT7	0.133180229	0.748207312
ENSG00000233229	CNOT7P1	0.175192363	1
ENSG00000232185	CNOT7P2	-0.183854148	1
ENSG00000155508	CNOT8	0.148837613	0.840562335
ENSG00000173786	CNP	-0.888447753	3.18E-14
ENSG00000115649	CNPPD1	-0.005708764	1
ENSG00000146910	CNPY1	-0.504904084	1
ENSG00000257727	CNPY2	0.154164038	0.584194392
ENSG00000137161	CNPY3	-0.390157513	0.001884953
ENSG00000166997	CNPY4	-1.281411485	1.77E-12
ENSG00000118432	CNR1	1.097612721	1
ENSG00000188822	CNR2	-0.149217975	1
ENSG00000119865	CNRIP1	-0.672075806	0.00016328
ENSG00000162852	CNST	0.828825675	5.89E-09
ENSG00000176563	CNTD1	0.202844488	0.783919238
ENSG00000105219	CNTD2	0.219124125	1
ENSG00000242689	CNTF	0.307737572	1
ENSG00000122756	CNTFR	0.610363226	0.01405157
ENSG00000044459	CNTLN	-0.138730815	1
ENSG00000018236	CNTN1	0.292251015	0.883150025
ENSG00000184144	CNTN2	-0.314905182	1
ENSG00000113805	CNTN3	0.531228049	0.724737913
ENSG00000144619	CNTN4	0.221046165	0.805616353
ENSG00000237990	CNTN4-AS1	-0.400811263	1
ENSG00000227588	CNTN4-AS2	-0.161135831	1
ENSG00000149972	CNTN5	0.255616346	0.756023337
ENSG00000134115	CNTN6	0.312948583	1
ENSG00000108797	CNTNAP1	-0.43398662	0.000477013
ENSG00000174469	CNTNAP2	-0.140583135	0.897442652
ENSG00000106714	CNTNAP3	0.082887471	1
ENSG00000154529	CNTNAP3B	0.261746125	0.749180474
ENSG00000152910	CNTNAP4	-0.202078585	1
ENSG00000155052	CNTNAP5	-0.24516497	1
ENSG00000119397	CNTRL	-0.82920967	1.98E-07
ENSG00000170037	CNTROB	0.069037511	1
ENSG00000106603	COA1	0.131382082	0.723921076
ENSG00000183978	COA3	0.022092463	1
ENSG00000181924	COA4	-0.177851193	0.492719244
ENSG00000183513	COA5	-0.286410023	0.216808288
ENSG00000168275	COA6	0.431094468	0.092381511
ENSG00000068120	COASY	0.364389304	0.001969684
ENSG00000106078	COBL	0.425744124	0.003839271
ENSG00000082438	COBLL1	0.497916041	0.006509624
ENSG00000100473	COCH	0.246908227	1
ENSG00000166685	COG1	-0.144784015	0.583618753
ENSG00000135775	COG2	0.276007956	0.214682064
ENSG00000136152	COG3	0.160269372	0.936165682
ENSG00000103051	COG4	-0.2346021	0.161467272
ENSG00000164597	COG5	0.068674849	1
ENSG00000133103	COG6	-0.59936166	0.01936593
ENSG00000168434	COG7	0.493067207	0.009018515
ENSG00000213380	COG8	0.156411227	0.466077809
ENSG00000121058	COIL	0.03512752	1
ENSG00000123500	COL10A1	-0.044036824	1
ENSG00000060718	COL11A1	-1.689683526	6.86E-10
ENSG00000204248	COL11A2	-0.385962274	0.303658762
ENSG00000206290	COL11A2	0	1
ENSG00000223699	COL11A2	0	1
ENSG00000227801	COL11A2	0	1
ENSG00000230930	COL11A2	0	1
ENSG00000232541	COL11A2	0	1
ENSG00000235708	COL11A2	0	1
ENSG00000226513	COL11A2P1	0	1
ENSG00000226591	COL11A2P1	0	1
ENSG00000227577	COL11A2P1	0	1
ENSG00000228164	COL11A2P1	0	1
ENSG00000228688	COL11A2P1	0	1
ENSG00000230816	COL11A2P1	0	1
ENSG00000232802	COL11A2P1	0	1
ENSG00000234249	COL11A2P1	0	1
ENSG00000111799	COL12A1	-0.39537737	0.000373519
ENSG00000197467	COL13A1	-0.445325408	0.171955023
ENSG00000187955	COL14A1	0.486414766	0.836725169
ENSG00000204291	COL15A1	0.144878974	1
ENSG00000084636	COL16A1	-1.625541043	2.87E-24
ENSG00000065618	COL17A1	0.366858979	0.557045186
ENSG00000182871	COL18A1	0.71263374	0.001559137
ENSG00000183535	COL18A1-AS1	-1.790042574	1
ENSG00000224574	COL18A1-AS2	0	1
ENSG00000082293	COL19A1	0.64136668	0.122329631
ENSG00000108821	COL1A1	-1.512150163	2.83E-54
ENSG00000164692	COL1A2	-0.294061247	1
ENSG00000101203	COL20A1	-0.372930988	1
ENSG00000124749	COL21A1	0.074980083	1
ENSG00000169436	COL22A1	-1.148914232	7.85E-15
ENSG00000050767	COL23A1	-0.065250801	1
ENSG00000171502	COL24A1	-0.201205631	1
ENSG00000188517	COL25A1	0.200484963	1
ENSG00000160963	COL26A1	0.371635006	0.576822557
ENSG00000196739	COL27A1	0.481725336	1.74E-05
ENSG00000215018	COL28A1	-0.386575337	1
ENSG00000139219	COL2A1	0.37996692	1
ENSG00000168542	COL3A1	-0.179776596	1
ENSG00000187498	COL4A1	-0.17564678	0.46015888
ENSG00000134871	COL4A2	-0.117841492	0.782786417
ENSG00000232814	COL4A2-AS1	-0.122889911	1
ENSG00000224821	COL4A2-AS2	0.004812888	1
ENSG00000169031	COL4A3	0.245750469	1
ENSG00000113163	COL4A3BP	0.091489532	1
ENSG00000081052	COL4A4	-0.250412252	1
ENSG00000188153	COL4A5	-0.886875547	0.001818651
ENSG00000197565	COL4A6	0.060814784	1
ENSG00000130635	COL5A1	-2.249634099	2.93E-70
ENSG00000204011	COL5A1-AS1	-1.905138794	0.333043958
ENSG00000204262	COL5A2	-1.617749111	1.80E-29
ENSG00000080573	COL5A3	0.77228101	0.022932905
ENSG00000142156	COL6A1	-0.406078956	0.000398908
ENSG00000142173	COL6A2	-0.938749233	5.33E-20
ENSG00000163359	COL6A3	-1.413706112	6.10E-41
ENSG00000230524	COL6A4P1	-0.218490958	1
ENSG00000228252	COL6A4P2	-0.523537278	1
ENSG00000172752	COL6A5	-0.408872299	1
ENSG00000206384	COL6A6	-0.723764145	1
ENSG00000114270	COL7A1	0.156064831	0.760518843
ENSG00000144810	COL8A1	-1.893937489	2.15E-12
ENSG00000171812	COL8A2	0.471567931	1
ENSG00000112280	COL9A1	-0.294551698	1
ENSG00000049089	COL9A2	-0.53645365	0.02101586
ENSG00000092758	COL9A3	0.769446488	1
ENSG00000184374	COLEC10	1.353512821	0.803565461
ENSG00000118004	COLEC11	-2.084579596	9.83E-21
ENSG00000158270	COLEC12	0.3975284	1
ENSG00000206561	COLQ	-0.508470494	0.579032398
ENSG00000173163	COMMD1	-0.203304781	0.273631244
ENSG00000145781	COMMD10	-0.203079666	0.666905416
ENSG00000114744	COMMD2	0.120186632	1
ENSG00000148444	COMMD3	-0.405731246	0.018372632
ENSG00000140365	COMMD4	-0.475077531	0.000278942
ENSG00000170619	COMMD5	0.481234459	4.48E-05
ENSG00000188243	COMMD6	-0.149262737	1
ENSG00000149600	COMMD7	-0.48338006	0.000730858
ENSG00000169019	COMMD8	-0.329807755	0.224859414
ENSG00000110442	COMMD9	0.238796609	0.220088415
ENSG00000105664	COMP	3.283241606	0.839452475
ENSG00000093010	COMT	-0.237817444	0.133099812
ENSG00000165644	COMTD1	0.424118929	0.020860074
ENSG00000122218	COPA	-0.106916163	0.839452475
ENSG00000129083	COPB1	-0.375019967	0.001869293
ENSG00000184432	COPB2	-0.215258822	0.155758981
ENSG00000105669	COPE	0.111251707	0.898643237
ENSG00000181789	COPG1	-0.13747304	0.597492478
ENSG00000158623	COPG2	-0.32591554	0.332482022
ENSG00000172301	COPRS	0.440372205	0.002164141
ENSG00000166200	COPS2	0.301070602	0.07178769
ENSG00000141030	COPS3	0.270038997	0.056769004
ENSG00000138663	COPS4	-0.091456916	1
ENSG00000121022	COPS5	0.064466886	1
ENSG00000213187	COPS5P	-0.484246123	0.486449771
ENSG00000168090	COPS6	-0.162795109	0.508960996
ENSG00000111652	COPS7A	0.066680117	1
ENSG00000144524	COPS7B	0.256653477	0.094752912
ENSG00000198612	COPS8	0.088927605	1
ENSG00000111481	COPZ1	-0.159545012	0.431824513
ENSG00000005243	COPZ2	-0.513011353	0.084063211
ENSG00000135469	COQ10A	-0.130798286	1
ENSG00000115520	COQ10B	0.393224209	0.102273482
ENSG00000251552	COQ10BP2	-0.96013732	1
ENSG00000173085	COQ2	-0.628755131	1.67E-05
ENSG00000132423	COQ3	-0.13416882	1
ENSG00000167113	COQ4	-0.002045462	1
ENSG00000110871	COQ5	-0.1392571	0.877797821
ENSG00000119723	COQ6	-0.170723461	0.659850706
ENSG00000167186	COQ7	0.382289902	0.242886652
ENSG00000088682	COQ9	0.173227497	0.469262652
ENSG00000145244	CORIN	-0.174940024	0.436052073
ENSG00000102879	CORO1A	-0.977630524	0.027820245
ENSG00000172725	CORO1B	-0.977681639	3.56E-15
ENSG00000110880	CORO1C	-0.115680553	0.779612501
ENSG00000106789	CORO2A	-0.958890624	4.18E-06
ENSG00000103647	CORO2B	-0.739700833	0.003299538
ENSG00000167549	CORO6	-0.161169979	1
ENSG00000262246	CORO7	0.258071458	0.080546204
ENSG00000103426	CORO7-PAM16	0.368017578	0.002137987
ENSG00000241563	CORT	0.042804322	1
ENSG00000103187	COTL1	0.045789758	1
ENSG00000229749	COTL1P1	0.291295394	1
ENSG00000235323	COTL1P2	0.338679387	0.783919238
ENSG00000006695	COX10	0.642222172	4.52E-05
ENSG00000236088	COX10-AS1	-0.206559389	1
ENSG00000166260	COX11	0.016905374	1
ENSG00000231162	COX11P1	-0.06434226	1
ENSG00000178449	COX14	0.119394907	0.922050148
ENSG00000014919	COX15	0.177918029	0.49092522
ENSG00000133983	COX16	-0.091266177	1
ENSG00000138495	COX17	0.096898707	1
ENSG00000205105	COX17P1	0.400439883	0.148425231
ENSG00000163626	COX18	-0.014440136	1
ENSG00000240230	COX19	0.41158395	0.003036529
ENSG00000203667	COX20	-0.414756012	0.021794413
ENSG00000213025	COX20P1	-0.357021246	0.720329729
ENSG00000235013	COX20P2	-0.479011193	1
ENSG00000131143	COX4I1	-0.070026619	1
ENSG00000258956	COX4I1P1	0.371717177	0.312142255
ENSG00000228869	COX4I1P2	0.17812081	1
ENSG00000131055	COX4I2	0.17812081	1
ENSG00000178741	COX5A	0.022335732	1
ENSG00000258981	COX5AP2	-0.224491156	0.99291541
ENSG00000135940	COX5B	-0.140820597	0.624204943
ENSG00000248448	COX5BP1	-0.392588695	0.766058833
ENSG00000213111	COX5BP2	-0.665088089	1
ENSG00000235967	COX5BP3	-1.790042574	1
ENSG00000237082	COX5BP6	-0.726518059	1
ENSG00000226024	COX5BP7	-3.437453706	0.530426505
ENSG00000223794	COX5BP8	-3.066132573	0.839452475
ENSG00000111775	COX6A1	0.035096027	1
ENSG00000226976	COX6A1P2	0.096914614	1
ENSG00000216710	COX6A1P3	2.771679111	1
ENSG00000156885	COX6A2	2.77084622	1
ENSG00000126267	COX6B1	-0.069441547	1
ENSG00000234565	COX6B1P1	-0.018486232	1
ENSG00000241788	COX6B1P2	-1.790042574	1
ENSG00000172912	COX6B1P3	1.968064759	1
ENSG00000253349	COX6B1P6	0	1
ENSG00000225242	COX6B1P7	0	1
ENSG00000160471	COX6B2	-0.961020237	1
ENSG00000164919	COX6C	-0.203780931	0.238384744
ENSG00000260318	COX6CP1	-0.326894959	0.438955966
ENSG00000231715	COX6CP2	-0.708793119	1
ENSG00000266251	COX6CP3	0	1
ENSG00000254642	COX6CP5	0	1
ENSG00000161281	COX7A1	-0.66695001	1
ENSG00000112695	COX7A2	-0.10084563	1
ENSG00000115944	COX7A2L	0.141993749	0.636637908
ENSG00000258626	COX7A2P1	-2.565116257	1
ENSG00000236764	COX7A2P2	-0.284232292	0.366117474
ENSG00000131174	COX7B	-0.02587391	1
ENSG00000170516	COX7B2	0.983438576	0.663237425
ENSG00000243453	COX7BP1	0.494648333	0.074827787
ENSG00000234274	COX7BP2	0.304264522	0.727635906
ENSG00000127184	COX7C	-0.324724338	0.009145494
ENSG00000235957	COX7CP1	0.005590005	1
ENSG00000176340	COX8A	-0.397764697	0.000697255
ENSG00000187581	COX8C	0	1
ENSG00000047457	CP	-0.569551279	0.159151823
ENSG00000091704	CPA1	0.17885654	1
ENSG00000158516	CPA2	-0.449270274	1
ENSG00000163751	CPA3	4.208664335	0.18756724
ENSG00000128510	CPA4	-0.982609986	1.62E-22
ENSG00000158525	CPA5	-1.1567564	0.005910414
ENSG00000165078	CPA6	0.163663659	0.866921331
ENSG00000160111	CPAMD8	0.212820109	1
ENSG00000153002	CPB1	-0.324056623	1
ENSG00000080618	CPB2	0.38395443	1
ENSG00000235903	CPB2-AS1	-1.467908985	1
ENSG00000108582	CPD	0.060350333	1
ENSG00000109472	CPE	-0.253151822	0.202800169
ENSG00000214575	CPEB1	0.649509499	7.11E-06
ENSG00000137449	CPEB2	0.293772272	0.67837192
ENSG00000107864	CPEB3	0.253630944	0.092026839
ENSG00000113742	CPEB4	0.312048672	0.160628221
ENSG00000106034	CPED1	-0.91432756	0.03038974
ENSG00000240216	CPHL1P	0.981293816	1
ENSG00000168993	CPLX1	1.694574711	5.72E-12
ENSG00000145920	CPLX2	1.676253261	0.000263068
ENSG00000213578	CPLX3	3.256555932	0.031588291
ENSG00000166569	CPLX4	0.718674955	1
ENSG00000135678	CPM	-0.049830213	1
ENSG00000120054	CPN1	0.067080186	1
ENSG00000178772	CPN2	0.178464133	1
ENSG00000214078	CPNE1	-0.114340216	0.783919238
ENSG00000140848	CPNE2	-1.217143585	7.42E-16
ENSG00000085719	CPNE3	0.05613881	1
ENSG00000196353	CPNE4	0.032616368	1
ENSG00000124772	CPNE5	0.865368067	0.012706468
ENSG00000100884	CPNE6	0	1
ENSG00000178773	CPNE7	-1.186371375	0.448297084
ENSG00000139117	CPNE8	0.331598265	0.08243944
ENSG00000144550	CPNE9	-0.287406446	1
ENSG00000144410	CPO	1.198238318	0.385852701
ENSG00000080819	CPOX	-0.402727431	0.000846828
ENSG00000103381	CPPED1	-0.661548145	5.19E-05
ENSG00000104324	CPQ	-0.307476053	0.803565461
ENSG00000021826	CPS1	-0.599664617	0.000814544
ENSG00000071894	CPSF1	0.13182084	0.59022769
ENSG00000214076	CPSF1P1	0.180060034	0.563801029
ENSG00000165934	CPSF2	-0.110719451	1
ENSG00000119203	CPSF3	-0.263413217	0.105623428
ENSG00000127054	CPSF3L	0.053532238	1
ENSG00000160917	CPSF4	0.019252908	1
ENSG00000187959	CPSF4L	-0.11070117	1
ENSG00000111605	CPSF6	0.172377474	0.38711798
ENSG00000149532	CPSF7	0.04371349	1
ENSG00000110090	CPT1A	0.404451786	0.162927611
ENSG00000205560	CPT1B	-0.125296715	0.904534162
ENSG00000169169	CPT1C	0.106494582	1
ENSG00000157184	CPT2	-0.043444023	1
ENSG00000106066	CPVL	0.603157703	0.872282548
ENSG00000147183	CPXCR1	1.968899115	1
ENSG00000088882	CPXM1	-1.790494539	1
ENSG00000121898	CPXM2	1.114329545	0.440260097
ENSG00000109625	CPZ	0.719003007	1.03E-08
ENSG00000203710	CR1	-0.033095676	1
ENSG00000197721	CR1L	-0.477268556	0.719228131
ENSG00000117322	CR2	2.377366566	1.51E-35
ENSG00000166426	CRABP1	-0.295628877	1
ENSG00000143320	CRABP2	0.026134029	1
ENSG00000169372	CRADD	0.106433493	1
ENSG00000007545	CRAMP1L	0.419550622	0.001079752
ENSG00000095321	CRAT	-2.013944232	1.81E-12
ENSG00000134376	CRB1	-0.482551765	0.017723347
ENSG00000148204	CRB2	-0.483552869	0.343575739
ENSG00000130545	CRB3	-0.449621505	1
ENSG00000113851	CRBN	0.222278049	0.482780723
ENSG00000241258	CRCP	0.579645451	1.87E-06
ENSG00000169509	CRCT1	0	1
ENSG00000118260	CREB1	-0.453021639	0.002362624
ENSG00000107175	CREB3	-0.39447546	0.006449771
ENSG00000157613	CREB3L1	-2.029073224	2.36E-38
ENSG00000182158	CREB3L2	-0.32505893	0.140549516
ENSG00000060566	CREB3L3	0.049278894	1
ENSG00000143578	CREB3L4	-1.069480675	7.86E-06
ENSG00000146592	CREB5	0.745632961	1.79E-10
ENSG00000005339	CREBBP	0.023147765	1
ENSG00000111269	CREBL2	-0.465861907	0.003690808
ENSG00000164463	CREBRF	0.490678622	0.007497407
ENSG00000137504	CREBZF	0.259291332	0.146631259
ENSG00000143162	CREG1	-0.129291217	1
ENSG00000175874	CREG2	-0.23435777	1
ENSG00000163703	CRELD1	-0.15325445	0.783919238
ENSG00000184164	CRELD2	-0.571843702	3.77E-05
ENSG00000095794	CREM	-0.0761132	1
ENSG00000147571	CRH	-1.790494539	1
ENSG00000145708	CRHBP	0.178365508	1
ENSG00000120088	CRHR1	-0.092468524	1
ENSG00000204650	CRHR1-IT1	-0.020052179	1
ENSG00000106113	CRHR2	0.496034172	0.29375256
ENSG00000150938	CRIM1	-0.2767128	0.024174251
ENSG00000213145	CRIP1	0.178022184	1
ENSG00000233252	CRIP1P1	0	1
ENSG00000238225	CRIP1P2	0	1
ENSG00000227109	CRIP1P3	2.77133639	1
ENSG00000182351	CRIP1P4	0	1
ENSG00000182809	CRIP2	-1.220098857	1.50E-13
ENSG00000146215	CRIP3	-1.789943949	1
ENSG00000179979	CRIPAK	-0.410925605	0.741559794
ENSG00000119878	CRIPT	-0.035575864	1
ENSG00000124812	CRISP1	1.871927826	1
ENSG00000124490	CRISP2	0.769971052	1
ENSG00000096006	CRISP3	1.968064759	1
ENSG00000121005	CRISPLD1	-1.450439151	2.16E-08
ENSG00000103196	CRISPLD2	-0.145664728	1
ENSG00000167193	CRK	-0.02034718	1
ENSG00000099942	CRKL	0.282040762	0.017803216
ENSG00000006016	CRLF1	-0.092800078	0.970487577
ENSG00000205755	CRLF2	0.088775845	1
ENSG00000176390	CRLF3	0.299267792	0.163797297
ENSG00000088766	CRLS1	0.177929168	0.751855278
ENSG00000072832	CRMP1	-0.781224179	3.18E-10
ENSG00000245694	CRNDE	-0.557724573	0.115679287
ENSG00000101343	CRNKL1	0.144087536	0.788257293
ENSG00000143536	CRNN	0	1
ENSG00000058453	CROCC	0.576869538	9.38E-07
ENSG00000225769	CROCCP1	0.397893667	0.281282689
ENSG00000215908	CROCCP2	0.791693651	1.64E-11
ENSG00000080947	CROCCP3	-0.053734784	1
ENSG00000227684	CROCCP4	-0.666255881	1
ENSG00000186543	CROCCP5	0.476455272	1
ENSG00000005469	CROT	-1.573700503	3.06E-09
ENSG00000132693	CRP	0	1
ENSG00000223603	CRPP1	0	1
ENSG00000095713	CRTAC1	0.441790828	0.604950344
ENSG00000109943	CRTAM	-3.731760279	0.530426505
ENSG00000170275	CRTAP	-0.535624895	1.37E-06
ENSG00000105662	CRTC1	0.056648059	1
ENSG00000160741	CRTC2	0.497066345	2.93E-05
ENSG00000140577	CRTC3	0.199871457	0.276270035
ENSG00000105392	CRX	0.440881511	1
ENSG00000008405	CRY1	0.770383181	7.05E-09
ENSG00000121671	CRY2	1.110382128	1.18E-14
ENSG00000160202	CRYAA	-1.790042574	1
ENSG00000109846	CRYAB	-0.859662442	0.000216252
ENSG00000108255	CRYBA1	-0.596501893	1
ENSG00000163499	CRYBA2	0	1
ENSG00000196431	CRYBA4	3.282899877	0.839452475
ENSG00000100122	CRYBB1	0.235521607	1
ENSG00000244752	CRYBB2	0.45565198	0.219544481
ENSG00000100058	CRYBB2P1	0.185217234	0.401917855
ENSG00000100053	CRYBB3	1.001508343	0.032466496
ENSG00000080200	CRYBG3	0.203839426	0.530426505
ENSG00000168582	CRYGA	1.968408083	1
ENSG00000182187	CRYGB	0	1
ENSG00000163254	CRYGC	-3.066329051	0.839452475
ENSG00000118231	CRYGD	0	1
ENSG00000229150	CRYGEP	-3.066230809	0.839452475
ENSG00000232799	CRYGFP	0	1
ENSG00000223710	CRYGGP	0	1
ENSG00000127377	CRYGN	1.968408083	1
ENSG00000213139	CRYGS	0.562927627	0.576990316
ENSG00000165475	CRYL1	-0.115634547	1
ENSG00000103316	CRYM	0.582372572	0.294708073
ENSG00000189149	CRYM-AS1	0.825873854	0.074082005
ENSG00000116791	CRYZ	-0.22665095	0.341988419
ENSG00000205758	CRYZL1	-0.515647616	0.015652317
ENSG00000233025	CRYZP1	-0.833562899	1
ENSG00000062485	CS	-0.056853723	1
ENSG00000139631	CSAD	-0.201672343	0.975622444
ENSG00000198930	CSAG1	-0.106659368	1
ENSG00000184324	CSAG2	-0.371923364	0.054283192
ENSG00000197463	CSAG3	-0.195309966	0.729659778
ENSG00000242599	CSAG4	0.265076202	0.058097543
ENSG00000060138	CSDA	0.53354104	1.77E-07
ENSG00000261614	CSDAP1	0.476017735	9.43E-05
ENSG00000172346	CSDC2	-0.623505945	1.32E-07
ENSG00000009307	CSDE1	-0.064967722	1
ENSG00000124207	CSE1L	-0.010358449	1
ENSG00000184371	CSF1	0.263455122	0.149501376
ENSG00000182578	CSF1R	-0.114616437	0.790029346
ENSG00000164400	CSF2	-0.294836	1
ENSG00000198223	CSF2RA	-0.335606502	0.985275188
ENSG00000100368	CSF2RB	-0.667605221	1
ENSG00000232254	CSF2RBP1	0.178955165	1
ENSG00000108342	CSF3	1.968064759	1
ENSG00000119535	CSF3R	1.493297657	1
ENSG00000147408	CSGALNACT1	0.31003219	1
ENSG00000169826	CSGALNACT2	-0.129447601	0.858893407
ENSG00000136488	CSH1	0	1
ENSG00000213218	CSH2	1.968408083	1
ENSG00000204414	CSHL1	-2.564566651	1
ENSG00000103653	CSK	0.31187584	0.016545115
ENSG00000183117	CSMD1	0.243022981	0.083993989
ENSG00000121904	CSMD2	-0.950764614	0.000839833
ENSG00000164796	CSMD3	0.342995817	0.442442307
ENSG00000126545	CSN1S1	0	1
ENSG00000234124	CSN1S2AP	-1.789943949	1
ENSG00000135222	CSN2	0	1
ENSG00000171209	CSN3	0	1
ENSG00000113712	CSNK1A1	0.034749583	1
ENSG00000180138	CSNK1A1L	-0.048095439	1
ENSG00000223518	CSNK1A1P1	0.192830532	0.783919238
ENSG00000250162	CSNK1A1P3	0.043556706	1
ENSG00000141551	CSNK1D	0.150285435	0.467263631
ENSG00000213923	CSNK1E	0.188156001	0.260670087
ENSG00000169118	CSNK1G1	0.251484972	0.108368506
ENSG00000133275	CSNK1G2	0.018834987	1
ENSG00000180846	CSNK1G2-AS1	1.42708314	0.117023476
ENSG00000151292	CSNK1G3	0.003328783	1
ENSG00000101266	CSNK2A1	0.261715703	0.065227214
ENSG00000070770	CSNK2A2	0.440985951	9.97E-05
ENSG00000254598	CSNK2A3	0.120003926	0.908424037
ENSG00000204435	CSNK2B	0.117903568	0.783919238
ENSG00000206406	CSNK2B	0	1
ENSG00000224398	CSNK2B	0	1
ENSG00000224774	CSNK2B	0	1
ENSG00000228875	CSNK2B	0	1
ENSG00000230700	CSNK2B	0	1
ENSG00000232960	CSNK2B	0	1
ENSG00000173546	CSPG4	-1.110229933	2.61E-27
ENSG00000240450	CSPG4P1Y	-0.113599533	1
ENSG00000244231	CSPG4P2Y	-0.050000833	1
ENSG00000172342	CSPG4P3Y	-1.013425621	0.24410566
ENSG00000172294	CSPG4P4Y	-0.416397934	1
ENSG00000235370	CSPG4P5	0.083188746	1
ENSG00000114646	CSPG5	-0.273878972	0.880474363
ENSG00000104218	CSPP1	0.482622611	0.0001337
ENSG00000144655	CSRNP1	1.131699984	2.99E-27
ENSG00000110925	CSRNP2	-0.045615869	1
ENSG00000178662	CSRNP3	-0.815998881	0.247892625
ENSG00000159176	CSRP1	-0.025467812	1
ENSG00000175183	CSRP2	-0.67454306	0.000690272
ENSG00000149474	CSRP2BP	-0.107662851	1
ENSG00000129170	CSRP3	-2.254329788	3.71E-18
ENSG00000170373	CST1	0.17812081	1
ENSG00000125831	CST11	0	1
ENSG00000226344	CST12P	0	1
ENSG00000204663	CST13P	-1.762958954	1
ENSG00000170369	CST2	0	1
ENSG00000232595	CST2P1	0	1
ENSG00000101439	CST3	-0.046823249	1
ENSG00000101441	CST4	0.178365508	1
ENSG00000170367	CST5	1.873358205	0.783919238
ENSG00000175315	CST6	-1.392693507	0.597492478
ENSG00000077984	CST7	-0.511899231	0.912486332
ENSG00000125815	CST8	0	1
ENSG00000173335	CST9	-1.790042574	1
ENSG00000101435	CST9L	0	1
ENSG00000204662	CST9LP1	0	1
ENSG00000121552	CSTA	-0.407022437	0.31703398
ENSG00000160213	CSTB	-0.339453649	0.019472695
ENSG00000101138	CSTF1	0.00492104	1
ENSG00000101811	CSTF2	0.416238788	0.000727812
ENSG00000177613	CSTF2T	0.021116502	1
ENSG00000176102	CSTF3	0.064476674	1
ENSG00000247151	CSTF3-AS1	-0.391229273	1
ENSG00000125823	CSTL1	0.17812081	1
ENSG00000228476	CSTP1	0	1
ENSG00000232478	CT45A1	0.326337553	0.042202294
ENSG00000242185	CT45A2	0.226008929	0.340152678
ENSG00000232417	CT45A3	0.098143572	1
ENSG00000228836	CT45A4	0.281020762	0.073424372
ENSG00000242284	CT45A5	0.269985839	0.265542482
ENSG00000226907	CT45A6	0.349993564	0.03412595
ENSG00000236371	CT47A1	-1.790042574	1
ENSG00000224089	CT47A10	0	1
ENSG00000226929	CT47A11	0	1
ENSG00000226685	CT47A12	0	1
ENSG00000242362	CT47A2	0	1
ENSG00000236126	CT47A3	0	1
ENSG00000230594	CT47A4	0	1
ENSG00000237957	CT47A5	0	1
ENSG00000226023	CT47A6	0	1
ENSG00000228517	CT47A7	0	1
ENSG00000230347	CT47A8	0	1
ENSG00000226600	CT47A9	0	1
ENSG00000236446	CT47B1	0	1
ENSG00000248131	CT49	-0.222932029	1
ENSG00000258710	CT60	-0.897464184	0.326431457
ENSG00000225362	CT62	0	1
ENSG00000241369	CT64	-0.145058714	1
ENSG00000183678	CTAG1A	0	1
ENSG00000184033	CTAG1B	1.968408083	1
ENSG00000126890	CTAG2	0	1
ENSG00000212710	CTAGE1	-0.329439327	1
ENSG00000181358	CTAGE10P	1.179748596	0.688581822
ENSG00000214249	CTAGE11P	-0.961558488	1
ENSG00000215441	CTAGE12P	0.102882939	1
ENSG00000230711	CTAGE13P	-0.071848124	1
ENSG00000214211	CTAGE14P	-0.447892037	1
ENSG00000176227	CTAGE15P	1.141798643	1
ENSG00000214335	CTAGE16P	1.068490025	0.594723711
ENSG00000232872	CTAGE3P	-0.226356887	1
ENSG00000225932	CTAGE4	-0.315841886	1
ENSG00000150527	CTAGE5	0.608003336	0.00375659
ENSG00000176366	CTAGE6P	-0.294836	1
ENSG00000233122	CTAGE7P	0.407674852	1
ENSG00000244693	CTAGE8	0.225066689	1
ENSG00000236761	CTAGE9	-0.66626488	1
ENSG00000159692	CTBP1	-0.19306911	0.303624841
ENSG00000196810	CTBP1-AS1	-0.277282843	0.530426505
ENSG00000175029	CTBP2	0.008507908	1
ENSG00000235857	CTBP2P1	0.304637345	1
ENSG00000117151	CTBS	-0.616648886	0.070717192
ENSG00000178971	CTC1	0.110414505	1
ENSG00000102974	CTCF	-0.175751147	0.37811862
ENSG00000124092	CTCFL	0.235269437	1
ENSG00000175826	CTDNEP1	-0.069173967	1
ENSG00000060069	CTDP1	0.590240671	2.60E-07
ENSG00000144579	CTDSP1	-0.529245575	4.40E-05
ENSG00000175215	CTDSP2	-0.978107939	7.41E-21
ENSG00000144677	CTDSPL	-0.469640412	0.007338863
ENSG00000137770	CTDSPL2	-0.180883396	0.530426505
ENSG00000150281	CTF1	-1.382217418	0.000465733
ENSG00000230447	CTF2P	-0.665186113	1
ENSG00000118523	CTGF	0.14948327	0.682849029
ENSG00000230869	CTGLF10P	0.628260576	0.012504432
ENSG00000204150	CTGLF11P	0.335489222	0.411743936
ENSG00000179296	CTGLF12P	0.579003863	0.094018163
ENSG00000243289	CTGLF8P	0.690591136	0.759942834
ENSG00000251479	CTGLF9P	0.429770017	1
ENSG00000116761	CTH	2.231215432	1.85E-32
ENSG00000164932	CTHRC1	-2.180452936	0.000372135
ENSG00000134030	CTIF	-0.164546201	0.519530584
ENSG00000163599	CTLA4	-2.564566651	1
ENSG00000044115	CTNNA1	-0.235718513	0.069902581
ENSG00000066032	CTNNA2	0.244700615	0.448297084
ENSG00000183230	CTNNA3	-0.017413493	1
ENSG00000119326	CTNNAL1	0.130992104	0.783919238
ENSG00000168036	CTNNB1	-0.272513419	0.029274322
ENSG00000178585	CTNNBIP1	-0.957107463	2.14E-07
ENSG00000132792	CTNNBL1	0.406895335	0.001269477
ENSG00000198561	CTNND1	-0.793609125	3.15E-14
ENSG00000169862	CTNND2	-0.305662336	0.882610415
ENSG00000040531	CTNS	0.247651475	0.253054962
ENSG00000171793	CTPS1	0.205135298	0.168809901
ENSG00000047230	CTPS2	-0.879807243	0.002019746
ENSG00000198730	CTR9	0.26384293	0.109110338
ENSG00000168925	CTRB1	1.493786969	1
ENSG00000168928	CTRB2	0	1
ENSG00000162438	CTRC	0.980902271	1
ENSG00000141086	CTRL	0.396690076	0.01717507
ENSG00000064601	CTSA	-0.034543332	1
ENSG00000164733	CTSB	-1.00194441	5.97E-25
ENSG00000109861	CTSC	-0.074188028	1
ENSG00000117984	CTSD	-0.481444035	8.94E-06
ENSG00000196188	CTSE	3.66090977	0.530426505
ENSG00000174080	CTSF	0.331752921	0.306665559
ENSG00000100448	CTSG	0	1
ENSG00000103811	CTSH	0.119994118	1
ENSG00000143387	CTSK	-0.106093429	1
ENSG00000135047	CTSL1	0.43516784	0.000184818
ENSG00000236417	CTSL1P1	0.49132622	1
ENSG00000224036	CTSL1P2	-0.294101315	1
ENSG00000228418	CTSL1P3	-0.44807908	1
ENSG00000230011	CTSL1P4	1.352459181	1
ENSG00000228745	CTSL1P5	-3.06568222	0.839452475
ENSG00000204437	CTSL1P6	-0.25802713	1
ENSG00000232438	CTSL1P7	-0.597051498	1
ENSG00000234575	CTSL1P8	0.468406544	1
ENSG00000136943	CTSL2	-0.474464803	0.029415817
ENSG00000188029	CTSL3P	0.743182728	0.402013424
ENSG00000256043	CTSO	-0.479831233	1
ENSG00000163131	CTSS	-0.919843575	0.020388717
ENSG00000172543	CTSW	0.382111616	1
ENSG00000101160	CTSZ	-0.567774396	1.14E-07
ENSG00000085733	CTTN	0.249151058	0.053284519
ENSG00000077063	CTTNBP2	-0.510495864	0.47526856
ENSG00000143079	CTTNBP2NL	-0.233541292	0.143279767
ENSG00000142544	CTU1	0.465310035	0.014883539
ENSG00000174177	CTU2	0.335837153	0.018164114
ENSG00000178531	CTXN1	-0.072159574	1
ENSG00000233932	CTXN2	0	1
ENSG00000205279	CTXN3	0	1
ENSG00000107611	CUBN	0.498647682	0.157288795
ENSG00000231009	CUBNP1	0	1
ENSG00000234993	CUBNP2	-1.097715667	1
ENSG00000235690	CUBNP3	-1.097372343	1
ENSG00000180891	CUEDC1	-0.649935721	3.19E-09
ENSG00000107874	CUEDC2	-0.216557605	0.377643179
ENSG00000055130	CUL1	0.287339907	0.101147272
ENSG00000108094	CUL2	-0.024258549	1
ENSG00000036257	CUL3	0.01762504	1
ENSG00000139842	CUL4A	0.314413603	0.008246677
ENSG00000248139	CUL4AP1	-0.849696505	1
ENSG00000158290	CUL4B	-0.92952845	8.95E-12
ENSG00000166266	CUL5	0.27864665	0.208085892
ENSG00000044090	CUL7	-0.639386814	1.05E-07
ENSG00000112659	CUL9	-0.566650588	2.95E-06
ENSG00000112514	CUTA	-0.006450677	1
ENSG00000226492	CUTA	0	1
ENSG00000119929	CUTC	0.231417141	0.156561085
ENSG00000257923	CUX1	-0.032152077	1
ENSG00000111249	CUX2	0.510853946	0.687001126
ENSG00000138161	CUZD1	0.063672191	1
ENSG00000150316	CWC15	-0.183680277	0.702419096
ENSG00000163510	CWC22	0.323096401	0.107178965
ENSG00000108296	CWC25	0.528903605	0.000392472
ENSG00000153015	CWC27	0.141843688	0.783919238
ENSG00000095485	CWF19L1	0.106742523	1
ENSG00000152404	CWF19L2	0.194477087	0.839452475
ENSG00000109182	CWH43	0.016922373	1
ENSG00000006210	CX3CL1	-0.615535387	0.007158152
ENSG00000168329	CX3CR1	1.968408083	1
ENSG00000154639	CXADR	-0.049888678	1
ENSG00000214319	CXADRP1	-0.362118442	1
ENSG00000258712	CXADRP2	-0.686134441	0.724737913
ENSG00000265766	CXADRP3	0.322437102	1
ENSG00000163739	CXCL1	0	1
ENSG00000169245	CXCL10	0	1
ENSG00000169248	CXCL11	0.980009157	1
ENSG00000107562	CXCL12	-0.425825705	1
ENSG00000156234	CXCL13	-0.999725805	0.020883734
ENSG00000145824	CXCL14	0.798818397	0.096508667
ENSG00000161921	CXCL16	0.108703139	1
ENSG00000189377	CXCL17	-0.153478902	1
ENSG00000250339	CXCL1P	0	1
ENSG00000081041	CXCL2	0	1
ENSG00000163734	CXCL3	0.788419896	1
ENSG00000163735	CXCL5	0.46973324	1
ENSG00000124875	CXCL6	3.284072842	0.839452475
ENSG00000138755	CXCL9	0	1
ENSG00000163464	CXCR1	1.968408083	1
ENSG00000180871	CXCR2	1.968408083	1
ENSG00000229754	CXCR2P1	2.77133639	1
ENSG00000186810	CXCR3	0	1
ENSG00000121966	CXCR4	0	1
ENSG00000160683	CXCR5	-0.556863114	5.49E-05
ENSG00000172215	CXCR6	0.629504937	0.118764094
ENSG00000144476	CXCR7	-1.464638287	2.72E-18
ENSG00000120280	CXorf21	0.595421207	1
ENSG00000165164	CXorf22	-1.247139638	0.803565461
ENSG00000173681	CXorf23	0.288564994	0.92767996
ENSG00000196741	CXorf24	-0.533086243	0.35522258
ENSG00000187516	CXorf27	-1.789943949	1
ENSG00000228459	CXorf28	-0.596953049	1
ENSG00000205081	CXorf30	0.027255964	1
ENSG00000204904	CXorf31	-0.871187383	1
ENSG00000147113	CXorf36	0.71950619	1
ENSG00000185753	CXorf38	-0.30233064	0.320796081
ENSG00000197620	CXorf40A	0.598848538	0.00269342
ENSG00000197021	CXorf40B	0.344763134	0.15508602
ENSG00000169551	CXorf48	2.770503696	1
ENSG00000215115	CXorf49	0	1
ENSG00000215113	CXorf49B	-1.790042574	1
ENSG00000224440	CXorf51A	0	1
ENSG00000235699	CXorf51B	0	1
ENSG00000018610	CXorf56	0.318253479	0.19656335
ENSG00000147231	CXorf57	-0.226645932	0.922847702
ENSG00000165182	CXorf58	0.012014139	1
ENSG00000204019	CXorf61	0.367073815	1
ENSG00000183631	CXorf64	0	1
ENSG00000204165	CXorf65	0	1
ENSG00000203933	CXorf66	-1.789943949	1
ENSG00000187690	CXorf67	0.00409012	1
ENSG00000154832	CXXC1	0.395648982	0.001473222
ENSG00000188011	CXXC11	0	1
ENSG00000187893	CXXC1P1	-0.16856012	1
ENSG00000168772	CXXC4	-0.602281285	0.036140041
ENSG00000171604	CXXC5	-0.5849868	0.003988145
ENSG00000008283	CYB561	0.06850067	1
ENSG00000174151	CYB561D1	-0.371197689	0.018437239
ENSG00000114395	CYB561D2	0.32419428	0.033247158
ENSG00000166347	CYB5A	-0.501858828	0.003779092
ENSG00000257503	CYB5AP5	0	1
ENSG00000103018	CYB5B	-0.397985051	0.001470566
ENSG00000182224	CYB5D1	1.190505203	4.52E-22
ENSG00000167740	CYB5D2	-0.150922627	0.65797048
ENSG00000159348	CYB5R1	0.188852303	0.568646821
ENSG00000166394	CYB5R2	0.71871311	1
ENSG00000100243	CYB5R3	-0.257207413	0.050748528
ENSG00000065615	CYB5R4	0.254104074	0.334077087
ENSG00000215883	CYB5RL	-0.133367608	1
ENSG00000051523	CYBA	-1.414322295	0.922847702
ENSG00000162144	CYBASC3	-0.414359143	0.004386222
ENSG00000165168	CYBB	-0.017546893	1
ENSG00000071967	CYBRD1	-0.273882653	0.18249975
ENSG00000179091	CYC1	0.124728087	0.666905416
ENSG00000172115	CYCS	0.304574337	0.021838347
ENSG00000232901	CYCSP10	1.165779104	0.881088702
ENSG00000224263	CYCSP12	1.968899115	1
ENSG00000259547	CYCSP2	0	1
ENSG00000255370	CYCSP25	1.645203963	0.688581822
ENSG00000255379	CYCSP29	0	1
ENSG00000257648	CYCSP30	0.980902271	1
ENSG00000223625	CYCSP32	-1.764852947	0.783919238
ENSG00000233545	CYCSP33	0.206562854	1
ENSG00000176268	CYCSP34	0.47459411	1
ENSG00000233549	CYCSP35	0	1
ENSG00000260690	CYCSP39	0.63075027	0.320405181
ENSG00000262870	CYCSP40	-1.789943949	1
ENSG00000227691	CYCSP41	0	1
ENSG00000224524	CYCSP42	0	1
ENSG00000227949	CYCSP46	-0.033807832	1
ENSG00000233843	CYCSP48	2.770503696	1
ENSG00000224240	CYCSP49	0	1
ENSG00000235700	CYCSP52	0.231173221	1
ENSG00000214810	CYCSP55	0.432799109	0.045729877
ENSG00000249909	CYCTP	0.206279569	1
ENSG00000068793	CYFIP1	0.122386364	0.737239589
ENSG00000055163	CYFIP2	-0.241316255	0.145360248
ENSG00000161544	CYGB	-0.965285685	0.138300641
ENSG00000187954	CYHR1	-0.275796763	0.074083745
ENSG00000183035	CYLC1	0	1
ENSG00000155833	CYLC2	0	1
ENSG00000083799	CYLD	-0.267511815	0.106729179
ENSG00000240194	CYMP	1.968408083	1
ENSG00000183146	CYorf17	1.141180739	1
ENSG00000140459	CYP11A1	-0.234306906	0.738518262
ENSG00000160882	CYP11B1	0	1
ENSG00000179142	CYP11B2	0	1
ENSG00000148795	CYP17A1	0.980803646	1
ENSG00000203886	CYP17A1-AS1	0	1
ENSG00000137869	CYP19A1	-0.09932374	1
ENSG00000140465	CYP1A1	0.889290665	1.47E-09
ENSG00000140505	CYP1A2	0.524209827	1
ENSG00000138061	CYP1B1	-0.542122651	1
ENSG00000232973	CYP1B1-AS1	-0.851155938	0.467695643
ENSG00000228024	CYP1D1P	2.77084622	1
ENSG00000119004	CYP20A1	-0.551043196	0.052663278
ENSG00000204338	CYP21A1P	-0.29534494	1
ENSG00000229856	CYP21A1P	0	1
ENSG00000231759	CYP21A1P	0	1
ENSG00000239882	CYP21A1P	0	1
ENSG00000198457	CYP21A2	0	1
ENSG00000206338	CYP21A2	0	1
ENSG00000231852	CYP21A2	-1.096881311	1
ENSG00000232414	CYP21A2	0	1
ENSG00000233151	CYP21A2	0	1
ENSG00000235134	CYP21A2	0	1
ENSG00000019186	CYP24A1	-0.7571729	5.15E-06
ENSG00000095596	CYP26A1	0	1
ENSG00000003137	CYP26B1	-0.99966825	1.47E-11
ENSG00000187553	CYP26C1	0.980694287	1
ENSG00000135929	CYP27A1	1.835744273	0.006651005
ENSG00000111012	CYP27B1	0.49600777	0.003421983
ENSG00000186684	CYP27C1	-0.890869059	0.266689931
ENSG00000197838	CYP2A13	-1.790494539	1
ENSG00000255974	CYP2A6	-3.733302807	0.320796081
ENSG00000198077	CYP2A7	2.771679111	1
ENSG00000213908	CYP2A7P1	0	1
ENSG00000233441	CYP2AB1P	0.718431637	1
ENSG00000216998	CYP2AC1P	2.771679111	1
ENSG00000197408	CYP2B6	-0.665226983	1
ENSG00000256612	CYP2B7P1	0.769495816	1
ENSG00000108242	CYP2C18	-1.150882836	0.07882183
ENSG00000165841	CYP2C19	-1.102282828	0.038317677
ENSG00000229641	CYP2C56P	0	1
ENSG00000235199	CYP2C58P	0	1
ENSG00000228460	CYP2C59P	0	1
ENSG00000138115	CYP2C8	1.096475855	1
ENSG00000138109	CYP2C9	-0.235877887	1
ENSG00000100197	CYP2D6	0.167075632	1
ENSG00000205702	CYP2D7P1	-0.139523346	1
ENSG00000226450	CYP2D8P1	-0.228963332	1
ENSG00000130649	CYP2E1	-0.405609455	0.276319982
ENSG00000197446	CYP2F1	-0.300693387	1
ENSG00000237118	CYP2F1P	-0.333072984	1
ENSG00000130612	CYP2G1P	-1.097429937	1
ENSG00000268101	CYP2G2P	0.71950619	1
ENSG00000134716	CYP2J2	-0.017341617	1
ENSG00000186104	CYP2R1	0.268801252	0.650386114
ENSG00000167600	CYP2S1	-0.525515351	0.067134561
ENSG00000233622	CYP2T2P	0.759843806	0.266689931
ENSG00000268529	CYP2T3P	0.218782006	1
ENSG00000155016	CYP2U1	0.502589496	0.074368685
ENSG00000073067	CYP2W1	-1.760768236	0.488772154
ENSG00000146233	CYP39A1	-3.075202356	0.002419611
ENSG00000160868	CYP3A4	0.594190504	1
ENSG00000021461	CYP3A43	0.380181337	1
ENSG00000106258	CYP3A5	0.209289236	1
ENSG00000160870	CYP3A7	0.23829034	1
ENSG00000036530	CYP46A1	-0.807838843	0.712824192
ENSG00000237180	CYP46A4P	-1.790042574	1
ENSG00000187048	CYP4A11	0	1
ENSG00000162365	CYP4A22	0	1
ENSG00000225506	CYP4A22-AS1	0.241247837	1
ENSG00000142973	CYP4B1	1.395659505	1
ENSG00000267241	CYP4F10P	0	1
ENSG00000171903	CYP4F11	-0.416249394	0.503513495
ENSG00000186204	CYP4F12	-0.0150483	1
ENSG00000186115	CYP4F2	1.395864749	1
ENSG00000171954	CYP4F22	0.018409883	1
ENSG00000269516	CYP4F23P	0.982122941	1
ENSG00000267594	CYP4F24P	-0.197706735	1
ENSG00000224106	CYP4F25P	-1.248031785	0.803565461
ENSG00000248313	CYP4F27P	-0.207108705	1
ENSG00000228314	CYP4F29P	0.595568681	1
ENSG00000186529	CYP4F3	-0.014991098	1
ENSG00000214081	CYP4F30P	0.19012891	1
ENSG00000178206	CYP4F31P	-0.060636473	1
ENSG00000223564	CYP4F32P	-1.647368165	2.54E-10
ENSG00000244155	CYP4F34P	-1.415902379	0.688581822
ENSG00000265787	CYP4F35P	-0.276768843	1
ENSG00000239402	CYP4F43P	-0.424762082	0.732658955
ENSG00000253748	CYP4F44P	0	1
ENSG00000230635	CYP4F60P	2.170245369	0.783919238
ENSG00000235327	CYP4F61P	-0.596600311	1
ENSG00000186526	CYP4F8	0.206377981	1
ENSG00000267392	CYP4F9P	-0.296177635	1
ENSG00000145476	CYP4V2	-0.94675091	0.010712549
ENSG00000186377	CYP4X1	-0.165681259	1
ENSG00000186160	CYP4Z1	-0.037291852	1
ENSG00000154198	CYP4Z2P	-0.359448201	0.209508212
ENSG00000001630	CYP51A1	0.162957405	0.57697431
ENSG00000233588	CYP51P2	-0.03834391	1
ENSG00000215223	CYP51P3	2.77084622	1
ENSG00000167910	CYP7A1	-0.66557854	1
ENSG00000172817	CYP7B1	0.409166707	0.775383817
ENSG00000180432	CYP8B1	0.224442802	1
ENSG00000142871	CYR61	-0.560818302	3.37E-08
ENSG00000205795	CYS1	-1.23054333	0.37811862
ENSG00000173198	CYSLTR1	1.166135967	0.881088702
ENSG00000152207	CYSLTR2	0	1
ENSG00000120306	CYSTM1	-0.234203695	0.148748403
ENSG00000108669	CYTH1	-0.176919778	0.556839857
ENSG00000105443	CYTH2	-0.828004951	7.94E-10
ENSG00000008256	CYTH3	-0.304240274	0.025559176
ENSG00000100055	CYTH4	0.379382267	0.935558251
ENSG00000115165	CYTIP	3.961165471	0.320796081
ENSG00000170891	CYTL1	-0.984208567	9.56E-05
ENSG00000166265	CYYR1	0.17129558	1
ENSG00000180902	D2HGDH	-0.46710561	0.010729041
ENSG00000100592	DAAM1	-0.055559209	1
ENSG00000146122	DAAM2	0.802466384	2.96E-08
ENSG00000173406	DAB1	-0.27759508	0.08754887
ENSG00000153071	DAB2	-0.603218553	4.45E-06
ENSG00000136848	DAB2IP	0.151557633	0.604036705
ENSG00000165659	DACH1	-0.148462109	1
ENSG00000126733	DACH2	-0.237648144	0.126019203
ENSG00000165617	DACT1	-0.200561209	1
ENSG00000164488	DACT2	1.968064759	1
ENSG00000197380	DACT3	0.722254215	0.005768726
ENSG00000245598	DACT3-AS1	-0.220742509	0.82836439
ENSG00000129562	DAD1	0.013776567	1
ENSG00000173402	DAG1	-1.046168911	3.38E-26
ENSG00000134780	DAGLA	0.354098175	0.006717959
ENSG00000164535	DAGLB	0.113108737	0.775383817
ENSG00000149476	DAK	-0.263214477	0.089404306
ENSG00000178149	DALRD3	-0.332121266	0.025536439
ENSG00000226950	DANCR	0.178691695	0.244436983
ENSG00000179284	DAND5	-0.314823495	1
ENSG00000110887	DAO	-0.161519471	1
ENSG00000182346	DAOA	0.981244876	1
ENSG00000232307	DAOA-AS1	0.981244876	1
ENSG00000112977	DAP	-0.372427885	0.001666644
ENSG00000132676	DAP3	0.118613628	0.81503566
ENSG00000225082	DAP3P1	0.089216889	1
ENSG00000228507	DAP3P2	0.39048881	0.354551685
ENSG00000196730	DAPK1	-0.009456635	1
ENSG00000236709	DAPK1-IT1	0	1
ENSG00000035664	DAPK2	-0.819345099	0.01319184
ENSG00000167657	DAPK3	0.074892419	1
ENSG00000163331	DAPL1	0.14268058	1
ENSG00000070190	DAPP1	0.596008091	1
ENSG00000213088	DARC	-1.211640843	0.28922182
ENSG00000115866	DARS	-0.17209905	0.43256978
ENSG00000117593	DARS2	-0.301227846	0.056203484
ENSG00000204209	DAXX	0.22525489	0.114516243
ENSG00000206206	DAXX	0	1
ENSG00000206279	DAXX	0	1
ENSG00000227046	DAXX	0	1
ENSG00000229396	DAXX	0	1
ENSG00000231617	DAXX	0	1
ENSG00000188120	DAZ1	-0.293610864	1
ENSG00000205944	DAZ2	0.217842033	1
ENSG00000187191	DAZ3	0.980841852	1
ENSG00000205916	DAZ4	0.523262015	1
ENSG00000071626	DAZAP1	0.071520389	1
ENSG00000183283	DAZAP2	-0.219986132	0.145877389
ENSG00000223825	DAZAP2P1	-0.317251255	0.344616968
ENSG00000092345	DAZL	0.98236835	0.803565461
ENSG00000078725	DBC1	0.18979651	1
ENSG00000006634	DBF4	-0.064324441	1
ENSG00000161692	DBF4B	0.193669733	0.371844534
ENSG00000235489	DBF4P1	0.265607031	0.569261786
ENSG00000123454	DBH	-0.960684127	1
ENSG00000225756	DBH-AS1	-2.565567584	1
ENSG00000155368	DBI	-0.438213172	0.000192691
ENSG00000231784	DBIL5P	-0.017321865	1
ENSG00000242412	DBIL5P2	0.178404576	1
ENSG00000218748	DBIP1	-0.472943208	0.017893204
ENSG00000251366	DBIP2	-1.789943949	1
ENSG00000113758	DBN1	-0.168361038	0.329688807
ENSG00000003249	DBNDD1	-1.557603498	5.99E-09
ENSG00000244274	DBNDD2	0.045896627	1
ENSG00000136279	DBNL	-0.38144007	0.001988393
ENSG00000105516	DBP	0.141422167	1
ENSG00000138231	DBR1	0.397355513	0.04620033
ENSG00000137992	DBT	-0.264921164	0.387081171
ENSG00000109851	DBX1	2.77084622	1
ENSG00000185610	DBX2	-1.789943949	1
ENSG00000122741	DCAF10	-0.033072768	1
ENSG00000100897	DCAF11	-0.348852172	0.03445223
ENSG00000198876	DCAF12	0.403593197	0.001116022
ENSG00000198889	DCAF12L1	0.156066168	1
ENSG00000198354	DCAF12L2	-0.250345196	1
ENSG00000164934	DCAF13	0.276033155	0.034836428
ENSG00000242562	DCAF13P1	0.302014652	0.394991043
ENSG00000250816	DCAF13P2	-0.103555365	1
ENSG00000259378	DCAF13P3	0.419697921	0.036357619
ENSG00000132017	DCAF15	-0.074406697	1
ENSG00000163257	DCAF16	-0.115839527	1
ENSG00000115827	DCAF17	0.166028365	0.720572605
ENSG00000119599	DCAF4	0.778456469	6.98E-12
ENSG00000182308	DCAF4L1	0.892662039	0.008332681
ENSG00000176566	DCAF4L2	0.718163334	1
ENSG00000139990	DCAF5	0.023097551	1
ENSG00000143164	DCAF6	-0.424428283	0.000458456
ENSG00000136485	DCAF7	-0.274536646	0.038860239
ENSG00000132716	DCAF8	-0.04050807	1
ENSG00000226372	DCAF8L1	0.350709061	1
ENSG00000189186	DCAF8L2	-0.194374549	0.620645812
ENSG00000172992	DCAKD	-0.692687814	8.67E-05
ENSG00000164465	DCBLD1	-0.732104657	3.10E-11
ENSG00000057019	DCBLD2	-0.625394318	9.71E-10
ENSG00000187323	DCC	-0.188695996	1
ENSG00000161634	DCD	0	1
ENSG00000146038	DCDC2	-0.042819125	1
ENSG00000222046	DCDC2B	-0.234326494	1
ENSG00000214866	DCDC2C	3.284072842	0.839452475
ENSG00000170959	DCDC5	-0.247301375	1
ENSG00000166341	DCHS1	-0.841232146	4.39E-08
ENSG00000197410	DCHS2	-0.252900142	0.425241864
ENSG00000156136	DCK	-0.508137237	0.002593714
ENSG00000133083	DCLK1	-0.317822602	0.432525167
ENSG00000170390	DCLK2	-0.067906468	1
ENSG00000163673	DCLK3	0.880388734	0.130993463
ENSG00000198924	DCLRE1A	-0.348595471	0.096884774
ENSG00000118655	DCLRE1B	-0.096168039	1
ENSG00000152457	DCLRE1C	0.311575223	0.047015317
ENSG00000237470	DCLRE1CP1	-0.344529345	0.670047747
ENSG00000011465	DCN	1.968064759	1
ENSG00000162290	DCP1A	0.467996328	0.000400221
ENSG00000151065	DCP1B	-0.523170072	0.005173233
ENSG00000172795	DCP2	-0.268977452	0.108213925
ENSG00000110063	DCPS	-0.286014411	0.233709421
ENSG00000163357	DCST1	-0.400344906	0.606517933
ENSG00000163354	DCST2	-0.677192504	0.82278999
ENSG00000164935	DCSTAMP	0.980559747	1
ENSG00000080166	DCT	-0.112300177	1
ENSG00000129187	DCTD	0.019598205	1
ENSG00000204843	DCTN1	-0.020798815	1
ENSG00000237737	DCTN1-AS1	0.024490885	1
ENSG00000175203	DCTN2	-0.401253425	0.00082787
ENSG00000137100	DCTN3	-0.534472757	4.71E-05
ENSG00000132912	DCTN4	-0.106165912	0.973254351
ENSG00000166847	DCTN5	0.328929066	0.017894592
ENSG00000104671	DCTN6	0.074952181	1
ENSG00000179958	DCTPP1	0.647075252	6.18E-09
ENSG00000043093	DCUN1D1	-0.126354022	1
ENSG00000150401	DCUN1D2	0.726341839	3.89E-08
ENSG00000227608	DCUN1D2-AS1	0.765474829	0.00030848
ENSG00000233613	DCUN1D2-AS2	1.267606528	0.022119525
ENSG00000188215	DCUN1D3	0.403220225	0.149954754
ENSG00000109184	DCUN1D4	0.022843368	1
ENSG00000137692	DCUN1D5	0.869817998	6.68E-12
ENSG00000077279	DCX	-0.90271785	1
ENSG00000169738	DCXR	-0.211632416	0.358442038
ENSG00000130311	DDA1	0.149555161	0.727840893
ENSG00000153904	DDAH1	0.056456744	1
ENSG00000206395	DDAH2	0	1
ENSG00000213722	DDAH2	-1.248667547	5.95E-17
ENSG00000225635	DDAH2	0	1
ENSG00000226634	DDAH2	0	1
ENSG00000227317	DDAH2	0	1
ENSG00000228128	DDAH2	0	1
ENSG00000233076	DDAH2	0	1
ENSG00000167986	DDB1	0.209689499	0.128584436
ENSG00000134574	DDB2	-0.834785084	8.35E-12
ENSG00000132437	DDC	0.624656144	0.839452475
ENSG00000100523	DDHD1	0.661640107	8.24E-07
ENSG00000085788	DDHD2	-0.203689522	0.340671379
ENSG00000170967	DDI1	0	1
ENSG00000197312	DDI2	0.504377739	4.12E-05
ENSG00000175197	DDIT3	1.031797943	1.58E-11
ENSG00000168209	DDIT4	0.919550807	6.56E-16
ENSG00000145358	DDIT4L	0	1
ENSG00000181418	DDN	-0.630784725	0.491279555
ENSG00000203797	DDO	-1.760269225	0.488772154
ENSG00000244038	DDOST	-0.151033484	0.46155928
ENSG00000137332	DDR1	0	1
ENSG00000204580	DDR1	-0.272238242	0.075908794
ENSG00000215522	DDR1	0	1
ENSG00000223680	DDR1	0	1
ENSG00000229767	DDR1	0	1
ENSG00000230456	DDR1	0	1
ENSG00000234078	DDR1	0	1
ENSG00000223405	DDR1-AS1	0	1
ENSG00000224360	DDR1-AS1	0	1
ENSG00000227422	DDR1-AS1	0	1
ENSG00000231444	DDR1-AS1	0	1
ENSG00000236492	DDR1-AS1	0	1
ENSG00000237775	DDR1-AS1	-1.790494539	1
ENSG00000162733	DDR2	-0.644054368	6.03E-05
ENSG00000198171	DDRGK1	0.141190427	0.8908486
ENSG00000099977	DDT	0.042091469	1
ENSG00000099974	DDTL	0.0290006	1
ENSG00000230683	DDTP1	1.968064759	1
ENSG00000079785	DDX1	0.215122178	0.145877389
ENSG00000178105	DDX10	0.897680985	3.68E-13
ENSG00000237135	DDX10P1	0	1
ENSG00000230360	DDX10P2	0.980248883	2.60E-05
ENSG00000013573	DDX11	0.364020993	0.002264604
ENSG00000245614	DDX11-AS1	-0.105465681	1
ENSG00000223972	DDX11L1	-0.139316631	1
ENSG00000233614	DDX11L10	-0.620870989	0.417792334
ENSG00000227159	DDX11L16	0.490360897	0.969894264
ENSG00000236397	DDX11L2	-0.352665045	0.812702742
ENSG00000236875	DDX11L5	-0.348239521	0.909479249
ENSG00000256263	DDX11L8	0.788488036	1
ENSG00000248472	DDX11L9	0.011558116	1
ENSG00000214826	DDX12P	0.448302073	8.64E-05
ENSG00000100201	DDX17	-0.252472633	0.050549621
ENSG00000088205	DDX18	0.191229603	0.248645408
ENSG00000259165	DDX18P1	0.300561955	0.639973359
ENSG00000255220	DDX18P5	0.594418269	0.009974785
ENSG00000220585	DDX18P6	0.320089055	0.838563665
ENSG00000168872	DDX19A	0.325019244	0.012001951
ENSG00000157349	DDX19B	0.140102141	0.73792931
ENSG00000064703	DDX20	0.458023686	0.00074713
ENSG00000165732	DDX21	0.658098509	2.06E-11
ENSG00000174243	DDX23	0.159656495	0.431032372
ENSG00000089737	DDX24	0.438203846	0.000458499
ENSG00000109832	DDX25	1.493981355	1
ENSG00000165359	DDX26B	-0.129425805	1
ENSG00000225235	DDX26B-AS1	-0.596256987	1
ENSG00000124228	DDX27	0.347045234	0.003547024
ENSG00000182810	DDX28	0.31247245	0.240548852
ENSG00000125485	DDX31	0.781131066	1.84E-09
ENSG00000123136	DDX39A	0.34496816	0.002934768
ENSG00000225777	DDX39AP1	0.232299685	1
ENSG00000198563	DDX39B	0.1006109	0.876433519
ENSG00000215425	DDX39B	0	1
ENSG00000225073	DDX39B	0	1
ENSG00000225859	DDX39B	0	1
ENSG00000229496	DDX39B	0	1
ENSG00000230624	DDX39B	0	1
ENSG00000235439	DDX39B	0	1
ENSG00000237889	DDX39B	0	1
ENSG00000228245	DDX39B-AS1	0	1
ENSG00000231647	DDX39B-AS1	0	1
ENSG00000232256	DDX39B-AS1	0	1
ENSG00000234006	DDX39B-AS1	0.022142398	1
ENSG00000234082	DDX39B-AS1	0	1
ENSG00000236019	DDX39B-AS1	0	1
ENSG00000238071	DDX39B-AS1	0	1
ENSG00000225926	DDX39BP1	0	1
ENSG00000228891	DDX39BP1	0	1
ENSG00000229364	DDX39BP1	0	1
ENSG00000233241	DDX39BP1	0	1
ENSG00000233677	DDX39BP1	1.493236379	1
ENSG00000235697	DDX39BP1	0	1
ENSG00000236265	DDX39BP1	0	1
ENSG00000236441	DDX39BP1	0	1
ENSG00000224362	DDX39BP2	0	1
ENSG00000227389	DDX39BP2	0	1
ENSG00000228458	DDX39BP2	0	1
ENSG00000234140	DDX39BP2	0	1
ENSG00000234242	DDX39BP2	0	1
ENSG00000235305	DDX39BP2	0	1
ENSG00000235809	DDX39BP2	0	1
ENSG00000238024	DDX39BP2	-0.597502825	1
ENSG00000215301	DDX3X	0.076784901	1
ENSG00000067048	DDX3Y	-0.006266181	1
ENSG00000232928	DDX3YP1	0.318405872	0.705779993
ENSG00000230986	DDX3YP2	0	1
ENSG00000251571	DDX3YP3	0.164052465	0.881182272
ENSG00000152670	DDX4	0.237165273	1
ENSG00000183258	DDX41	0.468061874	4.89E-05
ENSG00000198231	DDX42	0.183629702	0.283797596
ENSG00000080007	DDX43	0.151046558	1
ENSG00000145833	DDX46	0.328587745	0.00954112
ENSG00000213782	DDX47	0.277834161	0.044290584
ENSG00000105671	DDX49	0.857472077	6.51E-15
ENSG00000108654	DDX5	-0.076802027	1
ENSG00000107625	DDX50	-0.120733889	0.922847702
ENSG00000229816	DDX50P1	-0.085947036	1
ENSG00000240048	DDX50P2	-0.134733639	1
ENSG00000185163	DDX51	0.820288532	7.00E-13
ENSG00000141141	DDX52	0.351467478	0.032045401
ENSG00000184735	DDX53	0	1
ENSG00000123064	DDX54	0.256870036	0.042517086
ENSG00000111364	DDX55	0.432069471	0.001367112
ENSG00000136271	DDX56	0.502478877	4.73E-06
ENSG00000107201	DDX58	-0.754055356	0.000232674
ENSG00000118197	DDX59	-0.148267316	1
ENSG00000110367	DDX6	-0.285625128	0.095374519
ENSG00000137628	DDX60	-0.886045798	0.002477737
ENSG00000181381	DDX60L	-0.777351597	2.82E-06
ENSG00000225927	DDX6P1	0	1
ENSG00000227843	DDX6P1	0	1
ENSG00000228197	DDX6P1	0	1
ENSG00000229045	DDX6P1	0	1
ENSG00000230056	DDX6P1	-0.779776232	0.320796081
ENSG00000232435	DDX6P1	0	1
ENSG00000214181	DDX6P2	-0.506908436	0.391201926
ENSG00000177030	DEAF1	0.636367886	1.38E-06
ENSG00000104325	DECR1	-0.737438913	3.91E-05
ENSG00000242612	DECR2	-0.036235714	1
ENSG00000158796	DEDD	0.35072137	0.017000534
ENSG00000160570	DEDD2	0.251540721	0.23596205
ENSG00000023892	DEF6	-3.367031099	0.006465468
ENSG00000140995	DEF8	0.287820241	0.070883632
ENSG00000206047	DEFA1	0	1
ENSG00000233531	DEFA10P	0	1
ENSG00000234178	DEFA11P	0	1
ENSG00000240247	DEFA1B	0	1
ENSG00000239839	DEFA3	0	1
ENSG00000164821	DEFA4	0	1
ENSG00000164816	DEFA5	0	1
ENSG00000164822	DEFA6	0	1
ENSG00000206042	DEFA7P	0	1
ENSG00000223629	DEFA8P	0	1
ENSG00000233238	DEFA9P	0	1
ENSG00000164825	DEFB1	-2.56446824	1
ENSG00000176797	DEFB103A	0	1
ENSG00000177243	DEFB103B	-1.789943949	1
ENSG00000176782	DEFB104A	-1.790494539	1
ENSG00000177023	DEFB104B	0	1
ENSG00000186562	DEFB105A	0	1
ENSG00000186599	DEFB105B	0	1
ENSG00000186579	DEFB106A	0	1
ENSG00000187082	DEFB106B	0	1
ENSG00000186572	DEFB107A	0	1
ENSG00000198129	DEFB107B	-0.623551592	1
ENSG00000184276	DEFB108B	0	1
ENSG00000229907	DEFB108P1	0	1
ENSG00000215371	DEFB108P2	0	1
ENSG00000255544	DEFB108P3	0	1
ENSG00000254623	DEFB108P4	0	1
ENSG00000242296	DEFB109P1	-2.56466507	1
ENSG00000206034	DEFB109P1B	-2.565017808	1
ENSG00000254866	DEFB109P3	0	1
ENSG00000203970	DEFB110	0	1
ENSG00000180872	DEFB112	0	1
ENSG00000214642	DEFB113	0	1
ENSG00000177684	DEFB114	0	1
ENSG00000215547	DEFB115	0	1
ENSG00000215545	DEFB116	0	1
ENSG00000212717	DEFB117	0	1
ENSG00000131068	DEFB118	-2.564566651	1
ENSG00000180483	DEFB119	-0.596060157	1
ENSG00000204548	DEFB121	-1.790494539	1
ENSG00000204547	DEFB122	0.981951384	1
ENSG00000180424	DEFB123	1.494899882	1
ENSG00000180383	DEFB124	-1.269043128	0.521224271
ENSG00000178591	DEFB125	-0.29534494	1
ENSG00000125788	DEFB126	0	1
ENSG00000088782	DEFB127	0	1
ENSG00000185982	DEFB128	0	1
ENSG00000125903	DEFB129	0	1
ENSG00000232948	DEFB130	0	1
ENSG00000186146	DEFB131	0.578929012	1
ENSG00000186458	DEFB132	0	1
ENSG00000214643	DEFB133	0	1
ENSG00000205882	DEFB134	-0.597502825	1
ENSG00000205883	DEFB135	0	1
ENSG00000205884	DEFB136	0	1
ENSG00000171711	DEFB4A	0	1
ENSG00000177257	DEFB4B	0	1
ENSG00000215378	DEFT1P	0	1
ENSG00000232039	DEFT1P2	0	1
ENSG00000143753	DEGS1	0.07105748	1
ENSG00000168350	DEGS2	0.980841852	1
ENSG00000124795	DEK	-0.468428031	0.000138497
ENSG00000119522	DENND1A	0.3086876	0.071654775
ENSG00000213047	DENND1B	-0.058829887	1
ENSG00000205744	DENND1C	0.719164266	1
ENSG00000146966	DENND2A	-0.145945695	1
ENSG00000175984	DENND2C	1.040479734	3.47E-06
ENSG00000162777	DENND2D	1.871097574	1
ENSG00000105339	DENND3	-0.960265741	2.37E-13
ENSG00000174485	DENND4A	0.121278126	0.883598442
ENSG00000198837	DENND4B	0.141267927	0.617397676
ENSG00000137145	DENND4C	-0.451660653	0.061426034
ENSG00000184014	DENND5A	0.128491267	0.777350648
ENSG00000170456	DENND5B	-0.20074636	0.402567036
ENSG00000255867	DENND5B-AS1	0.194457679	0.583264027
ENSG00000174839	DENND6A	-0.151507525	1
ENSG00000205593	DENND6B	-1.238965799	0.017479618
ENSG00000139726	DENR	0.033219336	1
ENSG00000024526	DEPDC1	-0.319233605	0.074751273
ENSG00000035499	DEPDC1B	-0.499398702	0.000571494
ENSG00000166153	DEPDC4	0.605626544	0.018335731
ENSG00000100150	DEPDC5	-0.044581524	1
ENSG00000121690	DEPDC7	1.055561713	2.90E-06
ENSG00000155792	DEPTOR	0.963305396	0.001364397
ENSG00000023697	DERA	-0.724764262	1.33E-06
ENSG00000136986	DERL1	0.293704647	0.016517422
ENSG00000072849	DERL2	-0.294292416	0.197805784
ENSG00000099958	DERL3	0.980902271	1
ENSG00000175084	DES	-1.291897969	0.333043958
ENSG00000100418	DESI1	0.453269792	0.000408547
ENSG00000121644	DESI2	-0.070154128	1
ENSG00000140543	DET1	-0.729400893	0.02446844
ENSG00000182108	DEXI	0.410838707	0.007876189
ENSG00000160049	DFFA	0.333715978	0.006894111
ENSG00000169598	DFFB	0.446313183	0.304375443
ENSG00000105928	DFNA5	-0.701797153	1.35E-06
ENSG00000095397	DFNB31	1.265262086	7.79E-19
ENSG00000204311	DFNB59	0.325612699	0.025185353
ENSG00000185000	DGAT1	-0.130276977	0.862692135
ENSG00000062282	DGAT2	0.380948757	0.01322754
ENSG00000184210	DGAT2L6	0.177913544	1
ENSG00000205267	DGAT2L7P	-0.130274439	1
ENSG00000100056	DGCR14	0.306042818	0.0429701
ENSG00000070413	DGCR2	-0.614827014	1.03E-07
ENSG00000237517	DGCR5	0.110599803	1
ENSG00000183628	DGCR6	-0.426278807	0.013178363
ENSG00000128185	DGCR6L	-0.471264704	0.000324932
ENSG00000128191	DGCR8	-0.066004867	1
ENSG00000065357	DGKA	-0.524960744	0.004042358
ENSG00000136267	DGKB	0.052147953	1
ENSG00000077044	DGKD	0.257754631	0.0531885
ENSG00000153933	DGKE	0.986627535	1.32E-10
ENSG00000058866	DGKG	0.153735457	0.914238566
ENSG00000102780	DGKH	0.165838963	0.60884397
ENSG00000157680	DGKI	-0.153495369	0.437816126
ENSG00000204466	DGKK	-1.884987154	8.63E-10
ENSG00000145214	DGKQ	-0.125284033	1
ENSG00000149091	DGKZ	0.503617779	8.96E-06
ENSG00000179611	DGKZP1	0.41050878	0.000786933
ENSG00000114956	DGUOK	-0.096694946	1
ENSG00000237883	DGUOK-AS1	-0.098237121	1
ENSG00000116133	DHCR24	-0.253566539	0.040361618
ENSG00000172893	DHCR7	0.024948027	1
ENSG00000117682	DHDDS	-0.007171545	1
ENSG00000104808	DHDH	0.235561142	1
ENSG00000228716	DHFR	-0.07822918	1
ENSG00000178700	DHFRL1	-0.140975949	0.976096607
ENSG00000188985	DHFRP1	-0.852582268	7.36E-10
ENSG00000228432	DHFRP2	-0.744195417	0.603594755
ENSG00000230016	DHFRP2	0	1
ENSG00000233161	DHFRP2	0	1
ENSG00000233604	DHFRP2	0	1
ENSG00000236851	DHFRP2	0	1
ENSG00000139549	DHH	-1.468400017	1
ENSG00000102967	DHODH	0.775870355	7.67E-08
ENSG00000095059	DHPS	-0.111508223	1
ENSG00000157379	DHRS1	-0.076660352	1
ENSG00000108272	DHRS11	0.470121947	0.001962153
ENSG00000102796	DHRS12	0.209410993	1
ENSG00000167536	DHRS13	0.328957118	0.269735002
ENSG00000100867	DHRS2	-0.841973351	5.57E-18
ENSG00000162496	DHRS3	0.612689573	0.216292641
ENSG00000157326	DHRS4	-0.594761916	0.040562491
ENSG00000215256	DHRS4-AS1	-0.46404549	0.054283192
ENSG00000187630	DHRS4L2	-0.605748106	0.038854952
ENSG00000100612	DHRS7	-0.21243369	0.370966754
ENSG00000109016	DHRS7B	-0.094919677	1
ENSG00000184544	DHRS7C	0.596838343	1
ENSG00000073737	DHRS9	-0.071642378	1
ENSG00000169084	DHRSX	-0.314726426	0.214152072
ENSG00000223571	DHRSX-IT1	0	1
ENSG00000181192	DHTKD1	-0.350761493	0.433868003
ENSG00000109606	DHX15	0.198633425	0.198695747
ENSG00000204560	DHX16	0.624390871	1.35E-08
ENSG00000206486	DHX16	0	1
ENSG00000226171	DHX16	0	1
ENSG00000227222	DHX16	0	1
ENSG00000231377	DHX16	0	1
ENSG00000233049	DHX16	0	1
ENSG00000233418	DHX16	0	1
ENSG00000233561	DHX16	0	1
ENSG00000067248	DHX29	0.06122116	1
ENSG00000132153	DHX30	0.56120931	5.10E-08
ENSG00000089876	DHX32	0.121976632	0.908424037
ENSG00000005100	DHX33	0.486699516	2.51E-05
ENSG00000134815	DHX34	0.72028624	1.06E-10
ENSG00000101452	DHX35	-0.05255156	1
ENSG00000174953	DHX36	0.195303968	0.367815396
ENSG00000150990	DHX37	0.942568025	5.35E-21
ENSG00000140829	DHX38	0.352314356	0.002308012
ENSG00000108406	DHX40	0.383044935	0.00129463
ENSG00000266992	DHX40P1	0.46019217	0.010717414
ENSG00000163214	DHX57	0.437637236	0.000759593
ENSG00000108771	DHX58	-0.124854881	1
ENSG00000067596	DHX8	0.610491356	5.05E-09
ENSG00000135829	DHX9	0.215840738	0.117777428
ENSG00000228002	DHX9P1	0.253670099	0.109661824
ENSG00000184047	DIABLO	-0.077631414	1
ENSG00000131504	DIAPH1	0.25153173	0.048930932
ENSG00000147202	DIAPH2	0.46784897	0.00259355
ENSG00000236256	DIAPH2-AS1	0.172445448	1
ENSG00000139734	DIAPH3	0.002433557	1
ENSG00000227528	DIAPH3-AS1	0.143966582	1
ENSG00000223815	DIAPH3-AS2	0	1
ENSG00000100697	DICER1	0.077506902	1
ENSG00000235706	DICER1-AS1	0.45399041	1
ENSG00000101191	DIDO1	0.097290137	0.96354014
ENSG00000117597	DIEXF	0.407478638	0.004717287
ENSG00000086189	DIMT1	0.490937839	0.00038743
ENSG00000211452	DIO1	0.382439227	1
ENSG00000211448	DIO2	-0.397890997	0.372633608
ENSG00000258766	DIO2-AS1	-0.49378221	0.780793074
ENSG00000197406	DIO3	0	1
ENSG00000258498	DIO3OS	0	1
ENSG00000160305	DIP2A	-0.524896319	0.000509857
ENSG00000223692	DIP2A-IT1	1.608479672	0.305843913
ENSG00000066084	DIP2B	0.601824972	1.85E-07
ENSG00000151240	DIP2C	-0.303469892	0.527594626
ENSG00000176490	DIRAS1	-0.135193455	0.936523009
ENSG00000165023	DIRAS2	0.216951314	1
ENSG00000162595	DIRAS3	-1.148293285	0.954120814
ENSG00000174325	DIRC1	-1.469388947	1
ENSG00000138463	DIRC2	0.697192898	8.92E-07
ENSG00000231672	DIRC3	-0.877279253	0.176093421
ENSG00000083520	DIS3	0.361977656	0.053236975
ENSG00000166938	DIS3L	0.093475875	1
ENSG00000144535	DIS3L2	0.382691029	0.004355845
ENSG00000223788	DIS3L2P1	0.396483706	1
ENSG00000162946	DISC1	-0.068525553	1
ENSG00000226758	DISC1-IT1	-0.29583511	1
ENSG00000261645	DISC1FP1	-0.309954408	0.00648858
ENSG00000154309	DISP1	0.067256804	1
ENSG00000140323	DISP2	-1.370674597	3.26E-07
ENSG00000150764	DIXDC1	0.547200983	0.000411035
ENSG00000130826	DKC1	0.162586715	0.379395765
ENSG00000107984	DKK1	0.178404576	1
ENSG00000155011	DKK2	-0.293203062	0.249415248
ENSG00000050165	DKK3	-1.392455073	3.48E-32
ENSG00000104371	DKK4	0	1
ENSG00000104901	DKKL1	-0.036186097	1
ENSG00000215546	DKKL1P1	0	1
ENSG00000150768	DLAT	0.45324889	0.000113308
ENSG00000164741	DLC1	-0.184824065	0.491212706
ENSG00000091140	DLD	0.125789515	0.783919238
ENSG00000008226	DLEC1	-0.18251011	0.849565901
ENSG00000230123	DLEC1P1	-1.789943949	1
ENSG00000176124	DLEU1	0.029547624	1
ENSG00000231607	DLEU2	0.281891128	0.286708459
ENSG00000116652	DLEU2L	0.397742472	1
ENSG00000186047	DLEU7	-0.251828239	1
ENSG00000237152	DLEU7-AS1	-0.962252137	1
ENSG00000075711	DLG1	-0.214207895	0.231313958
ENSG00000227375	DLG1-AS1	-0.058734422	1
ENSG00000150672	DLG2	-0.176430685	0.330558068
ENSG00000082458	DLG3	-0.294553099	0.349636506
ENSG00000231651	DLG3-AS1	0.616062711	1
ENSG00000132535	DLG4	-0.227851897	0.236207539
ENSG00000151208	DLG5	-0.409414918	0.000220082
ENSG00000170579	DLGAP1	-0.18042379	0.500076661
ENSG00000177337	DLGAP1-AS1	-1.145534942	3.27E-06
ENSG00000262001	DLGAP1-AS2	-0.352559141	0.284938257
ENSG00000263724	DLGAP1-AS3	1.058784958	0.234095744
ENSG00000263878	DLGAP1-AS4	0.198126772	1
ENSG00000261520	DLGAP1-AS5	1.870756363	1
ENSG00000198010	DLGAP2	0.60379124	1
ENSG00000116544	DLGAP3	-0.200701984	1
ENSG00000080845	DLGAP4	-0.672511699	2.81E-09
ENSG00000126787	DLGAP5	-0.679177264	1.11E-08
ENSG00000237195	DLGAP5P1	0	1
ENSG00000185559	DLK1	0	1
ENSG00000171462	DLK2	-0.036519488	1
ENSG00000198719	DLL1	1.270258347	0.038901105
ENSG00000090932	DLL3	0.863757466	0.032140469
ENSG00000128917	DLL4	3.961506197	0.320796081
ENSG00000119689	DLST	0.289552266	0.021551767
ENSG00000144355	DLX1	-1.083464513	0.835206038
ENSG00000115844	DLX2	0	1
ENSG00000064195	DLX3	0.46036574	0.724737913
ENSG00000108813	DLX4	-1.005850357	0.000149919
ENSG00000105880	DLX5	0.440517265	1
ENSG00000006377	DLX6	-0.295286352	1
ENSG00000231764	DLX6-AS1	-0.295286352	1
ENSG00000248849	DLX6-AS2	0	1
ENSG00000178028	DMAP1	0.055002269	1
ENSG00000187908	DMBT1	-0.504854672	1
ENSG00000197587	DMBX1	-1.790494539	1
ENSG00000100206	DMC1	-0.504056334	0.200218829
ENSG00000198947	DMD	0.079906482	1
ENSG00000244186	DMD-AS1	-0.449065276	1
ENSG00000242286	DMD-AS2	0.685824114	1
ENSG00000236828	DMD-AS3	0	1
ENSG00000132837	DMGDH	0.340143913	0.862224843
ENSG00000161249	DMKN	0.304984885	0.267768346
ENSG00000152592	DMP1	0	1
ENSG00000104936	DMPK	0.196641626	0.469193948
ENSG00000137090	DMRT1	0.678992627	0.559446927
ENSG00000173253	DMRT2	-3.066230809	0.839452475
ENSG00000064218	DMRT3	-0.716881844	1
ENSG00000176399	DMRTA1	0.042954319	1
ENSG00000142700	DMRTA2	-1.469045623	1
ENSG00000143006	DMRTB1	0	1
ENSG00000159123	DMRTC1	-0.727384214	1
ENSG00000184911	DMRTC1B	-0.72426927	1
ENSG00000142025	DMRTC2	0	1
ENSG00000135164	DMTF1	-0.336858734	0.093132947
ENSG00000185800	DMWD	0.364243335	0.01797686
ENSG00000172869	DMXL1	-0.153278882	0.775383817
ENSG00000104093	DMXL2	-0.400143721	0.01267115
ENSG00000138346	DNA2	-0.432615122	0.008883265
ENSG00000154099	DNAAF1	0.325923097	0.12437083
ENSG00000165506	DNAAF2	0.59810292	4.05E-05
ENSG00000167646	DNAAF3	1.047502251	4.46E-16
ENSG00000114841	DNAH1	-0.232175195	0.803565461
ENSG00000197653	DNAH10	-0.08674145	1
ENSG00000250091	DNAH10OS	0.34955693	1
ENSG00000105877	DNAH11	0.162744457	0.766034824
ENSG00000174844	DNAH12	0.163181249	0.862692135
ENSG00000185842	DNAH14	0.242275804	0.778949515
ENSG00000187775	DNAH17	0.646296715	6.03E-07
ENSG00000183914	DNAH2	-0.06112357	1
ENSG00000158486	DNAH3	0.340831362	0.789503067
ENSG00000039139	DNAH5	0.170763517	1
ENSG00000115423	DNAH6	-0.156659907	0.662779236
ENSG00000118997	DNAH7	0.565783428	0.339372297
ENSG00000124721	DNAH8	-0.00413834	1
ENSG00000007174	DNAH9	0.423681066	0.748493737
ENSG00000122735	DNAI1	-0.520186249	0.184171566
ENSG00000171595	DNAI2	1.596233423	0.11916654
ENSG00000086061	DNAJA1	0.132345303	0.585568327
ENSG00000223717	DNAJA1P1	0.503013256	0.305843913
ENSG00000236917	DNAJA1P2	0.122472474	1
ENSG00000215007	DNAJA1P3	0.181090594	0.486176109
ENSG00000218089	DNAJA1P4	0.980461122	1
ENSG00000162699	DNAJA1P5	0.123685877	1
ENSG00000228045	DNAJA1P6	1.39638994	0.922847702
ENSG00000069345	DNAJA2	0.487223063	2.72E-05
ENSG00000103423	DNAJA3	0.341801856	0.006918084
ENSG00000140403	DNAJA4	1.222244222	2.22E-20
ENSG00000132002	DNAJB1	0.194825368	0.245406543
ENSG00000090520	DNAJB11	0.113422732	0.874998496
ENSG00000148719	DNAJB12	0.066511222	1
ENSG00000187726	DNAJB13	0.24062468	1
ENSG00000164031	DNAJB14	-0.647866144	1.18E-05
ENSG00000213946	DNAJB1P1	0.128629252	1
ENSG00000135924	DNAJB2	-0.482223316	2.16E-05
ENSG00000227802	DNAJB3	0	1
ENSG00000162616	DNAJB4	-0.488037587	0.026979497
ENSG00000137094	DNAJB5	0.262981667	0.061426034
ENSG00000105993	DNAJB6	0.265166712	0.096667016
ENSG00000172404	DNAJB7	-0.427446663	0.643418268
ENSG00000179407	DNAJB8	0	1
ENSG00000242049	DNAJB8-AS1	0	1
ENSG00000128590	DNAJB9	0.600258995	0.004736083
ENSG00000136770	DNAJC1	-0.064516433	1
ENSG00000077232	DNAJC10	-0.222946543	0.132410788
ENSG00000007923	DNAJC11	0.458910398	8.60E-05
ENSG00000108176	DNAJC12	1.302585856	1.03E-07
ENSG00000138246	DNAJC13	-0.640894978	9.09E-08
ENSG00000135392	DNAJC14	0.143914836	0.679350421
ENSG00000120675	DNAJC15	0.0377393	1
ENSG00000116138	DNAJC16	-0.151762285	0.94090345
ENSG00000104129	DNAJC17	0.207195567	0.688873143
ENSG00000170464	DNAJC18	0.247408831	0.722076866
ENSG00000205981	DNAJC19	-0.25281053	0.63742967
ENSG00000237141	DNAJC19P1	-1.765140162	0.783919238
ENSG00000269266	DNAJC19P2	0	1
ENSG00000268997	DNAJC19P3	0	1
ENSG00000225310	DNAJC19P4	1.968408083	1
ENSG00000225808	DNAJC19P5	0	1
ENSG00000220871	DNAJC19P6	1.968064759	1
ENSG00000237663	DNAJC19P7	0.206072569	1
ENSG00000232793	DNAJC19P8	0	1
ENSG00000258608	DNAJC19P9	-0.26060243	0.685157828
ENSG00000105821	DNAJC2	0.723187624	1.25E-10
ENSG00000168724	DNAJC21	-0.031024379	1
ENSG00000178401	DNAJC22	-1.566205863	7.95E-12
ENSG00000170946	DNAJC24	0.449177346	0.067528662
ENSG00000059769	DNAJC25	0.479122782	0.000405477
ENSG00000244115	DNAJC25-GNG10	0.48123407	0.0003777
ENSG00000115137	DNAJC27	0.041911791	1
ENSG00000224165	DNAJC27-AS1	-0.305542111	1
ENSG00000177692	DNAJC28	-0.326604193	1
ENSG00000102580	DNAJC3	0.017042215	1
ENSG00000247400	DNAJC3-AS1	-0.188449576	1
ENSG00000176410	DNAJC30	-0.432209124	0.165365334
ENSG00000110011	DNAJC4	-0.647985608	0.002707528
ENSG00000101152	DNAJC5	-0.059626706	1
ENSG00000147570	DNAJC5B	0.236283044	1
ENSG00000163793	DNAJC5G	1.840325804	0.038075193
ENSG00000116675	DNAJC6	0.58167833	0.000364282
ENSG00000168259	DNAJC7	0.311829998	0.013257729
ENSG00000126698	DNAJC8	-0.002366459	1
ENSG00000213551	DNAJC9	-0.455984777	0.000138426
ENSG00000236756	DNAJC9-AS1	-0.305669365	0.0197119
ENSG00000119661	DNAL1	0.174145899	0.932339071
ENSG00000100246	DNAL4	-0.184706103	1
ENSG00000163879	DNALI1	1.947374192	0.004662075
ENSG00000213918	DNASE1	0.501318166	1.75E-06
ENSG00000013563	DNASE1L1	-0.18559236	0.549516647
ENSG00000167968	DNASE1L2	-0.196936212	1
ENSG00000163687	DNASE1L3	1.09668425	1
ENSG00000105612	DNASE2	-0.728101302	3.11E-06
ENSG00000137976	DNASE2B	0	1
ENSG00000256453	DND1	0.238912696	0.295279435
ENSG00000264070	DND1P1	-0.010985097	1
ENSG00000187957	DNER	-0.251425229	1
ENSG00000179532	DNHD1	0.114160528	1
ENSG00000213221	DNLZ	-0.022813966	1
ENSG00000106976	DNM1	-0.496172747	3.27E-05
ENSG00000087470	DNM1L	-0.177919956	0.313750495
ENSG00000250833	DNM1P17	3.282899877	0.839452475
ENSG00000242854	DNM1P24	-0.277775902	1
ENSG00000260897	DNM1P30	0.227346355	1
ENSG00000261491	DNM1P31	1.493236379	1
ENSG00000261708	DNM1P32	-0.596158569	1
ENSG00000260096	DNM1P33	0.981636537	1
ENSG00000260357	DNM1P34	0.981293816	1
ENSG00000246877	DNM1P35	-0.972958008	0.016408006
ENSG00000259567	DNM1P38	-0.902409952	1
ENSG00000259637	DNM1P42	-0.390114759	1
ENSG00000259297	DNM1P44	0.734234342	0.102273482
ENSG00000182397	DNM1P46	0.01040065	1
ENSG00000239304	DNM1P48	-1.789943949	1
ENSG00000079805	DNM2	-0.041279833	1
ENSG00000197959	DNM3	-0.034974432	1
ENSG00000233540	DNM3-IT1	1.968064759	1
ENSG00000230630	DNM3OS	-0.745667493	0.416010915
ENSG00000107554	DNMBP	0.161862771	0.566342317
ENSG00000227695	DNMBP-AS1	0.062010651	1
ENSG00000130816	DNMT1	-0.021599386	1
ENSG00000119772	DNMT3A	0.241822135	0.368236719
ENSG00000088305	DNMT3B	-0.069536861	1
ENSG00000142182	DNMT3L	-0.069142354	1
ENSG00000123992	DNPEP	0.052455669	1
ENSG00000112667	DNPH1	-0.132535891	1
ENSG00000107447	DNTT	-1.097617462	1
ENSG00000101457	DNTTIP1	0.314238852	0.059493807
ENSG00000067334	DNTTIP2	0.647005253	4.78E-09
ENSG00000149927	DOC2A	0.288260419	0.276607846
ENSG00000262359	DOC2B	1.39638994	0.922847702
ENSG00000231793	DOC2GP	-0.398175425	0.913651813
ENSG00000150760	DOCK1	-0.533230074	6.26E-05
ENSG00000135905	DOCK10	-0.277181189	0.17311522
ENSG00000147251	DOCK11	-0.562254178	0.137712814
ENSG00000134516	DOCK2	-0.45382888	0.03472866
ENSG00000088538	DOCK3	-0.105933411	1
ENSG00000128512	DOCK4	0.975126673	4.97E-08
ENSG00000147459	DOCK5	-0.282510699	0.086666314
ENSG00000130158	DOCK6	0.31572225	0.0320345
ENSG00000116641	DOCK7	0.204058904	0.317587739
ENSG00000107099	DOCK8	-0.197473995	1
ENSG00000088387	DOCK9	0.016530268	1
ENSG00000229918	DOCK9-AS1	0	1
ENSG00000260992	DOCK9-AS2	-1.789943949	1
ENSG00000129932	DOHH	0.781946229	1.79E-09
ENSG00000115325	DOK1	-0.596173361	1.90E-05
ENSG00000147443	DOK2	1.871245098	1
ENSG00000146094	DOK3	0.461270588	0.00030908
ENSG00000125170	DOK4	0.214988369	0.304365108
ENSG00000101134	DOK5	-0.719076793	0.054812441
ENSG00000206052	DOK6	0.162432717	1
ENSG00000175920	DOK7	0.595508827	1
ENSG00000175283	DOLK	-0.0427252	1
ENSG00000167130	DOLPP1	0.037124409	1
ENSG00000204348	DOM3Z	0.239315921	0.249155737
ENSG00000206346	DOM3Z	0	1
ENSG00000224313	DOM3Z	0	1
ENSG00000225682	DOM3Z	0	1
ENSG00000234798	DOM3Z	0	1
ENSG00000236765	DOM3Z	0	1
ENSG00000159147	DONSON	-0.214234418	0.283569102
ENSG00000083097	DOPEY1	0.181476238	0.757608831
ENSG00000142197	DOPEY2	-0.439535629	0.004098313
ENSG00000104885	DOT1L	0.540212447	3.80E-07
ENSG00000172269	DPAGT1	-0.114154535	0.911362656
ENSG00000166171	DPCD	0.325424419	0.041740712
ENSG00000168631	DPCR1	-3.978037117	0.18756724
ENSG00000229284	DPCR1	0	1
ENSG00000232251	DPCR1	0	1
ENSG00000232308	DPCR1	0	1
ENSG00000257232	DPCR1	0	1
ENSG00000015413	DPEP1	1.095987171	1
ENSG00000167261	DPEP2	2.16984224	0.783919238
ENSG00000141096	DPEP3	0	1
ENSG00000011332	DPF1	0.3184252	0.788458044
ENSG00000133884	DPF2	0.174962405	0.45773959
ENSG00000205683	DPF3	-0.665241783	0.103012948
ENSG00000108963	DPH1	0.542620842	1.10E-05
ENSG00000132768	DPH2	1.075425455	1.27E-27
ENSG00000154813	DPH3	0.120020415	1
ENSG00000233838	DPH3P1	0.416890146	0.630581358
ENSG00000237040	DPH3P2	0	1
ENSG00000117543	DPH5	0.03447007	1
ENSG00000000419	DPM1	0.325789972	0.040933773
ENSG00000136908	DPM2	0.208488794	0.222296475
ENSG00000179085	DPM3	-0.366511865	0.096054288
ENSG00000175497	DPP10	0.24527457	0.277220063
ENSG00000254986	DPP3	-0.317446807	0.021914285
ENSG00000197635	DPP4	-0.338825654	0.699848946
ENSG00000130226	DPP6	0.875152505	0.00083932
ENSG00000176978	DPP7	0.183382931	0.331842277
ENSG00000074603	DPP8	-0.05253427	1
ENSG00000142002	DPP9	0.232261445	0.124953776
ENSG00000163530	DPPA2	-0.453163771	0.937492299
ENSG00000223915	DPPA2P1	-1.790042574	1
ENSG00000224129	DPPA2P2	-1.015233833	1
ENSG00000224403	DPPA2P3	0	1
ENSG00000261429	DPPA2P4	0	1
ENSG00000187569	DPPA3	-1.098264293	1
ENSG00000227067	DPPA3P1	-3.066132573	0.839452475
ENSG00000188831	DPPA3P2	1.968408083	1
ENSG00000121570	DPPA4	0.178955165	1
ENSG00000203909	DPPA5	0	1
ENSG00000269776	DPPA5P1	0	1
ENSG00000259427	DPPA5P2	0	1
ENSG00000204595	DPRX	-0.59666847	1
ENSG00000264743	DPRXP4	0	1
ENSG00000143196	DPT	-3.065780426	0.839452475
ENSG00000173852	DPY19L1	-0.509377937	0.000141544
ENSG00000177990	DPY19L2	-0.138437808	1
ENSG00000189212	DPY19L2P1	0.159979448	0.881896617
ENSG00000170629	DPY19L2P2	-0.378062078	0.224630692
ENSG00000227855	DPY19L2P3	0.440162872	0.047610453
ENSG00000235436	DPY19L2P4	0.959095049	0.363101092
ENSG00000178904	DPY19L3	0.203130374	0.637493216
ENSG00000156162	DPY19L4	-0.476964287	0.013074949
ENSG00000162961	DPY30	0.203283874	0.298702405
ENSG00000188641	DPYD	-0.084142768	1
ENSG00000232878	DPYD-AS1	-0.335136506	1
ENSG00000235777	DPYD-AS2	0	1
ENSG00000232542	DPYD-IT1	0.604635136	1
ENSG00000147647	DPYS	0.233416792	1
ENSG00000092964	DPYSL2	-1.740567213	1.92E-43
ENSG00000113657	DPYSL3	0.282855346	0.032300276
ENSG00000151640	DPYSL4	0.160573381	0.764791839
ENSG00000157851	DPYSL5	-1.106014571	6.83E-11
ENSG00000144045	DQX1	-0.109742488	1
ENSG00000117505	DR1	0.312316506	0.030806223
ENSG00000136048	DRAM1	-0.050579545	1
ENSG00000156171	DRAM2	-0.249336624	0.422822044
ENSG00000175550	DRAP1	-0.314314627	0.012094257
ENSG00000162490	DRAXIN	-1.312782605	0.045628767
ENSG00000225574	DRAXINP1	0	1
ENSG00000184845	DRD1	-0.449612083	1
ENSG00000149295	DRD2	0.626029007	1
ENSG00000151577	DRD3	-1.207533421	0.922847702
ENSG00000069696	DRD4	-0.728369572	0.970311513
ENSG00000169676	DRD5	1.968408083	1
ENSG00000184303	DRD5P1	3.661103427	0.530426505
ENSG00000175658	DRD5P2	0.579131697	1
ENSG00000185721	DRG1	0.165765558	0.425241864
ENSG00000108591	DRG2	0.478881629	0.00019386
ENSG00000165606	DRGX	1.493578303	1
ENSG00000113360	DROSHA	0.112119533	0.830746135
ENSG00000102385	DRP2	-1.113620832	0.011578037
ENSG00000134765	DSC1	-0.294992661	1
ENSG00000134755	DSC2	-0.940823024	4.15E-06
ENSG00000134762	DSC3	0.871695405	0.881088702
ENSG00000171587	DSCAM	0.516218514	0.289393139
ENSG00000235123	DSCAM-AS1	1.968899115	1
ENSG00000233756	DSCAM-IT1	0	1
ENSG00000177103	DSCAML1	-0.27023367	1
ENSG00000136982	DSCC1	-0.178750305	0.529133572
ENSG00000233316	DSCR10	0	1
ENSG00000157538	DSCR3	-0.396713854	0.010919024
ENSG00000184029	DSCR4	1.596500751	0.11916654
ENSG00000223608	DSCR4-IT1	1.968408083	1
ENSG00000183145	DSCR6	0.227249928	1
ENSG00000198054	DSCR8	-0.294934206	1
ENSG00000230366	DSCR9	1.174635921	0.120841314
ENSG00000111817	DSE	0.124789365	0.695903272
ENSG00000171451	DSEL	-0.10825582	1
ENSG00000134760	DSG1	-1.469290916	1
ENSG00000046604	DSG2	-0.488886874	1.61E-05
ENSG00000134757	DSG3	2.170487244	0.783919238
ENSG00000175065	DSG4	-1.790042574	1
ENSG00000149636	DSN1	-0.783838113	2.32E-07
ENSG00000096696	DSP	1.032818957	0.157192841
ENSG00000152591	DSPP	0	1
ENSG00000151914	DST	-0.417060914	0.000111578
ENSG00000125868	DSTN	-0.243323738	0.097882215
ENSG00000230982	DSTNP1	0.134499066	1
ENSG00000248593	DSTNP2	-0.387808611	0.364932591
ENSG00000215034	DSTNP4	0.232574046	1
ENSG00000236681	DSTNP5	-0.161564278	1
ENSG00000133059	DSTYK	0.220627748	0.244471267
ENSG00000125821	DTD1	-0.012031446	1
ENSG00000129480	DTD2	0.218712939	0.983239122
ENSG00000197057	DTHD1	0.21932053	1
ENSG00000143476	DTL	-0.075855816	1
ENSG00000134769	DTNA	-0.291407456	0.193419921
ENSG00000138101	DTNB	0.276587433	0.159065998
ENSG00000047579	DTNBP1	0.346822693	0.149501376
ENSG00000104047	DTWD1	0.137701076	1
ENSG00000169570	DTWD2	-0.275530052	0.03269773
ENSG00000135144	DTX1	-0.419007958	0.17448149
ENSG00000091073	DTX2	-0.169598238	0.688581822
ENSG00000186704	DTX2P1	0.075335189	1
ENSG00000265479	DTX2P1-UPK3BP1-PMS2P11	0.039319473	1
ENSG00000178498	DTX3	-0.73643898	0.000248652
ENSG00000163840	DTX3L	-0.571537209	4.18E-07
ENSG00000110042	DTX4	0.581938876	0.000137282
ENSG00000168393	DTYMK	-0.292870065	0.076061008
ENSG00000137857	DUOX1	-0.665491107	0.372633608
ENSG00000140279	DUOX2	0.206279569	1
ENSG00000140254	DUOXA1	-1.204818184	1
ENSG00000140274	DUOXA2	-3.066230809	0.839452475
ENSG00000188716	DUPD1	0.206377981	1
ENSG00000169718	DUS1L	0.489853387	8.28E-06
ENSG00000167264	DUS2L	0.303331267	0.05136557
ENSG00000141994	DUS3L	0.591714206	2.12E-06
ENSG00000105865	DUS4L	0.348044144	0.23998788
ENSG00000120129	DUSP1	-0.209894966	0.192976408
ENSG00000143507	DUSP10	-1.04146336	2.89E-05
ENSG00000144048	DUSP11	0.332374099	0.062940231
ENSG00000081721	DUSP12	0.366153744	0.027096746
ENSG00000079393	DUSP13	-1.207338063	0.922847702
ENSG00000161326	DUSP14	0.378030082	0.012514839
ENSG00000149599	DUSP15	-0.220394614	1
ENSG00000111266	DUSP16	0.024396173	1
ENSG00000167065	DUSP18	-0.733468172	0.000433129
ENSG00000162999	DUSP19	-0.315502386	1
ENSG00000158050	DUSP2	1.77832622	1.10E-49
ENSG00000189037	DUSP21	0	1
ENSG00000112679	DUSP22	-0.288571192	0.229368327
ENSG00000158716	DUSP23	1.968064759	1
ENSG00000133878	DUSP26	0.206661303	1
ENSG00000198842	DUSP27	-1.393435696	0.597492478
ENSG00000188542	DUSP28	-0.177248738	1
ENSG00000108861	DUSP3	-0.249573705	0.072454624
ENSG00000120875	DUSP4	0.207014041	1
ENSG00000138166	DUSP5	1.068140813	2.09E-15
ENSG00000183929	DUSP5P1	0.266709565	0.809304306
ENSG00000235338	DUSP5P2	3.66090977	0.530426505
ENSG00000139318	DUSP6	-0.296275907	1
ENSG00000164086	DUSP7	0.783089901	1.45E-12
ENSG00000184545	DUSP8	0.074999151	1
ENSG00000213686	DUSP8P1	-0.329801431	1
ENSG00000215024	DUSP8P2	0.630037195	0.689399355
ENSG00000215097	DUSP8P3	0.869890474	0.306387625
ENSG00000215065	DUSP8P4	0.238071978	1
ENSG00000235316	DUSP8P5	0.262504205	1
ENSG00000130829	DUSP9	0.38287025	0.01447336
ENSG00000128951	DUT	-0.33145452	0.031414289
ENSG00000229048	DUTP1	-3.438001523	0.530426505
ENSG00000254388	DUTP2	0.206279569	1
ENSG00000226857	DUTP3	0	1
ENSG00000229829	DUTP4	0	1
ENSG00000216439	DUTP5	-0.835077142	0.306387625
ENSG00000225171	DUTP6	0	1
ENSG00000250473	DUTP7	-0.426282956	1
ENSG00000214904	DUTP8	-0.676714839	0.82278999
ENSG00000258389	DUX4	3.283241606	0.839452475
ENSG00000258911	DUX4L10	0.178464133	1
ENSG00000258434	DUX4L11	1.853912778	0.688581822
ENSG00000259139	DUX4L12	0.17757022	1
ENSG00000258617	DUX4L13	0.71871311	1
ENSG00000258514	DUX4L14	-1.790494539	1
ENSG00000235950	DUX4L15	-3.065780426	0.839452475
ENSG00000258567	DUX4L16	1.700990284	0.223506927
ENSG00000259128	DUX4L2	0	1
ENSG00000259034	DUX4L3	-1.789943949	1
ENSG00000258834	DUX4L4	0.17757022	1
ENSG00000259063	DUX4L5	0.206111527	1
ENSG00000258697	DUX4L6	-1.789943949	1
ENSG00000258755	DUX4L7	2.77133639	1
ENSG00000250537	DUX4L8	-0.596501893	1
ENSG00000224807	DUX4L9	-0.186614313	1
ENSG00000258873	DUXA	1.353378306	0.803565461
ENSG00000259056	DUXAP1	0	1
ENSG00000255377	DUXAP5	0	1
ENSG00000232136	DUXAP7	-1.083263998	1
ENSG00000107404	DVL1	0.278485178	0.040044994
ENSG00000004975	DVL2	-0.587648	6.58E-05
ENSG00000161202	DVL3	-0.108843944	0.940917346
ENSG00000170788	DYDC1	0.595020093	1
ENSG00000133665	DYDC2	0.474933825	1
ENSG00000141627	DYM	0.00775353	1
ENSG00000178690	DYNAP	0	1
ENSG00000197102	DYNC1H1	-0.278748763	0.027396881
ENSG00000158560	DYNC1I1	-0.337587902	0.640561439
ENSG00000077380	DYNC1I2	-0.395539074	0.003245779
ENSG00000225137	DYNC1I2P1	-0.392236019	0.006510177
ENSG00000144635	DYNC1LI1	0.124932487	0.874429062
ENSG00000135720	DYNC1LI2	-0.037757592	1
ENSG00000187240	DYNC2H1	0.514367347	0.000271521
ENSG00000138036	DYNC2LI1	-0.463383866	0.235734692
ENSG00000088986	DYNLL1	-0.234071553	0.107434786
ENSG00000205579	DYNLL1P1	-0.42438216	0.041283208
ENSG00000121083	DYNLL2	0.062284343	1
ENSG00000125971	DYNLRB1	-0.327483195	0.047061112
ENSG00000168589	DYNLRB2	0.218732625	1
ENSG00000146425	DYNLT1	-0.325529285	0.036211646
ENSG00000165169	DYNLT3	-0.591225716	0.017247131
ENSG00000232241	DYNLT3P1	1.092841595	0.720076559
ENSG00000229758	DYNLT3P2	-1.113525368	0.422936739
ENSG00000157540	DYRK1A	0.112397953	1
ENSG00000105204	DYRK1B	0.586448284	0.07877793
ENSG00000127334	DYRK2	0.415502977	0.002019525
ENSG00000143479	DYRK3	0.619820178	1.52E-06
ENSG00000010219	DYRK4	0.264792606	0.192617577
ENSG00000135636	DYSF	-2.203543767	2.81E-16
ENSG00000232125	DYTN	1.070002586	0.594723711
ENSG00000256061	DYX1C1	0.377969812	0.417603131
ENSG00000261771	DYX1C1-CCPG1	-0.115494064	1
ENSG00000089091	DZANK1	0.298431206	0.835620434
ENSG00000134874	DZIP1	-0.085460242	1
ENSG00000158163	DZIP1L	-0.076353757	1
ENSG00000198919	DZIP3	-0.499650486	0.000240895
ENSG00000101412	E2F1	0.058216879	1
ENSG00000007968	E2F2	-0.705005774	3.50E-09
ENSG00000112242	E2F3	0.33259225	0.028441783
ENSG00000224707	E2F3-IT1	1.968064759	1
ENSG00000205250	E2F4	0.367489504	0.002217999
ENSG00000231276	E2F4P1	0.319417309	1
ENSG00000133740	E2F5	-0.074696654	1
ENSG00000169016	E2F6	0.646640104	1.59E-05
ENSG00000165891	E2F7	-0.68812898	6.19E-07
ENSG00000129173	E2F8	-0.463984865	0.031764564
ENSG00000167967	E4F1	0.152987308	0.629209849
ENSG00000144597	EAF1	0.848593529	2.34E-12
ENSG00000249786	EAF1-AS1	0.856164561	1.96E-11
ENSG00000145088	EAF2	-0.073480413	1
ENSG00000129518	EAPP	0.321863647	0.375860516
ENSG00000103356	EARS2	0.210368335	0.245996277
ENSG00000147654	EBAG9	0.443802207	0.016357878
ENSG00000164330	EBF1	-1.035955192	0.06469754
ENSG00000221818	EBF2	1.553989185	0.107031356
ENSG00000108001	EBF3	1.715490977	9.17E-20
ENSG00000088881	EBF4	-0.933572946	0.011521288
ENSG00000105246	EBI3	-0.616394535	0.178998749
ENSG00000223601	EBLN1	2.771679111	1
ENSG00000255423	EBLN2	-0.46108888	1
ENSG00000117395	EBNA1BP2	0.600478622	3.34E-09
ENSG00000147155	EBP	-0.5651425	3.27E-06
ENSG00000123179	EBPL	0.165332401	0.883577682
ENSG00000122882	ECD	0.297000092	0.043086861
ENSG00000117298	ECE1	-0.05140591	1
ENSG00000145194	ECE2	0.801234487	1.24E-10
ENSG00000171551	ECEL1	0	1
ENSG00000244280	ECEL1P2	0	1
ENSG00000230122	ECEL1P3	1.968064759	1
ENSG00000104823	ECH1	-0.696313066	3.57E-05
ENSG00000093144	ECHDC1	0.078278912	1
ENSG00000121310	ECHDC2	-0.235576758	0.802732708
ENSG00000134463	ECHDC3	-0.07466883	1
ENSG00000127884	ECHS1	-0.118442611	0.839452475
ENSG00000167969	ECI1	-0.271894728	0.119916835
ENSG00000198721	ECI2	-0.13761453	0.848570888
ENSG00000143369	ECM1	-1.138817255	5.42E-15
ENSG00000106823	ECM2	0.236017785	1
ENSG00000249751	ECSCR	-0.596501893	1
ENSG00000130159	ECSIT	0.222050038	0.172962696
ENSG00000114346	ECT2	-0.513955564	1.05E-05
ENSG00000203734	ECT2L	0.650606503	0.666905416
ENSG00000158813	EDA	0.073559891	1
ENSG00000131080	EDA2R	0.167434691	0.631605273
ENSG00000135960	EDAR	0.021537839	1
ENSG00000186197	EDARADD	-0.164452165	0.336650519
ENSG00000179151	EDC3	0.529304896	1.83E-05
ENSG00000038358	EDC4	0.604108006	4.38E-09
ENSG00000181562	EDDM3A	0	1
ENSG00000181552	EDDM3B	-1.789943949	1
ENSG00000134109	EDEM1	-0.101625602	0.991458432
ENSG00000088298	EDEM2	-0.240496613	0.084352791
ENSG00000116406	EDEM3	0.240882717	0.284733673
ENSG00000107223	EDF1	-0.166256984	0.400034339
ENSG00000164176	EDIL3	-1.29137531	6.73E-18
ENSG00000078401	EDN1	-1.455694345	0.002378738
ENSG00000127129	EDN2	-2.421421243	1.88E-13
ENSG00000124205	EDN3	0.980902271	1
ENSG00000151617	EDNRA	1.27941633	1.48E-07
ENSG00000136160	EDNRB	1.968899115	1
ENSG00000102189	EEA1	-0.073332256	1
ENSG00000074266	EED	0.252281804	0.282710097
ENSG00000156508	EEF1A1	-0.342336293	0.001462417
ENSG00000223822	EEF1A1P1	-0.150386692	0.839452475
ENSG00000243746	EEF1A1P10	-0.267758321	0.087230563
ENSG00000228502	EEF1A1P11	-0.313582277	0.005420101
ENSG00000214199	EEF1A1P12	-0.353298875	0.001801935
ENSG00000233057	EEF1A1P14	-0.204571899	0.16825057
ENSG00000213704	EEF1A1P15	0.056998452	1
ENSG00000257907	EEF1A1P17	-0.406426931	0.004711496
ENSG00000255127	EEF1A1P18	0.207210871	1
ENSG00000249855	EEF1A1P19	-0.306954101	0.008712109
ENSG00000249963	EEF1A1P20	-0.236988426	1
ENSG00000249542	EEF1A1P21	-1.027425834	0.272170359
ENSG00000223668	EEF1A1P24	-0.310093611	0.015818556
ENSG00000241429	EEF1A1P25	-0.437762929	0.000265133
ENSG00000233167	EEF1A1P26	0.088729789	1
ENSG00000179460	EEF1A1P27	-0.485459089	0.040634038
ENSG00000237709	EEF1A1P28	-0.170864726	0.650386114
ENSG00000215093	EEF1A1P29	-0.135723424	0.765625915
ENSG00000232587	EEF1A1P3	-0.468648093	0.000166188
ENSG00000237757	EEF1A1P30	-0.164400793	0.912636279
ENSG00000237859	EEF1A1P31	-1.393932367	0.597492478
ENSG00000213046	EEF1A1P32	-0.415094512	0.218653754
ENSG00000213235	EEF1A1P33	-0.308277889	0.01936593
ENSG00000233324	EEF1A1P34	0.243556272	1
ENSG00000223912	EEF1A1P36	-0.576527103	0.007940252
ENSG00000254124	EEF1A1P37	2.77084622	1
ENSG00000261557	EEF1A1P38	-0.407525938	0.00108653
ENSG00000230125	EEF1A1P39	0	1
ENSG00000231144	EEF1A1P40	0	1
ENSG00000223600	EEF1A1P41	-0.596501893	1
ENSG00000196205	EEF1A1P5	-0.339074218	0.001598894
ENSG00000233476	EEF1A1P6	-0.308731079	0.005856703
ENSG00000268222	EEF1A1P7	-0.349539747	0.004021648
ENSG00000223529	EEF1A1P8	-0.316768231	0.014245463
ENSG00000249264	EEF1A1P9	-0.270152924	0.023424475
ENSG00000101210	EEF1A2	0.071850174	1
ENSG00000114942	EEF1B2	0.153462484	0.467695643
ENSG00000231169	EEF1B2P1	0.052751717	1
ENSG00000213864	EEF1B2P2	0.080107104	1
ENSG00000232472	EEF1B2P3	0.16825322	0.445249865
ENSG00000257119	EEF1B2P4	0.127083057	1
ENSG00000225121	EEF1B2P5	0.416739585	1
ENSG00000104529	EEF1D	0.226432761	0.079236322
ENSG00000228887	EEF1DP1	0.067287302	1
ENSG00000226721	EEF1DP2	0.141210614	0.653985192
ENSG00000229715	EEF1DP3	0.321479948	0.158202478
ENSG00000213130	EEF1DP5	0.20195511	0.994264396
ENSG00000124802	EEF1E1	0.252683168	0.249415248
ENSG00000254772	EEF1G	-0.124571716	0.640356414
ENSG00000186676	EEF1GP1	-0.170928437	0.680270192
ENSG00000250346	EEF1GP2	-0.019186513	1
ENSG00000226845	EEF1GP3	-0.146521979	1
ENSG00000240138	EEF1GP4	-0.221696454	1
ENSG00000234785	EEF1GP5	-0.035371475	1
ENSG00000216518	EEF1GP6	0	1
ENSG00000236290	EEF1GP7	-0.468162878	1
ENSG00000234125	EEF1GP8	-0.194277766	0.901432574
ENSG00000167658	EEF2	0.171022451	0.27477915
ENSG00000103319	EEF2K	0.315848581	0.105170505
ENSG00000132394	EEFSEC	-0.260306424	0.517167746
ENSG00000122547	EEPD1	0.079335073	1
ENSG00000034239	EFCAB1	2.201620856	0.333043958
ENSG00000185055	EFCAB10	0.043684882	1
ENSG00000140025	EFCAB11	-0.704698883	1.59E-05
ENSG00000172771	EFCAB12	-0.600393865	0.232830324
ENSG00000178852	EFCAB13	0.22361196	0.575009523
ENSG00000159658	EFCAB14	-0.01998489	1
ENSG00000228237	EFCAB14-AS1	0.031545859	1
ENSG00000228348	EFCAB14P1	0.042432418	1
ENSG00000203666	EFCAB2	-0.678989685	0.04495576
ENSG00000172421	EFCAB3	0.29917691	0.08957934
ENSG00000177685	EFCAB4A	-1.465107647	0.017255267
ENSG00000130038	EFCAB4B	0.537358541	1.94E-06
ENSG00000176927	EFCAB5	0.181828963	0.881182272
ENSG00000186976	EFCAB6	-0.298507098	0.051190211
ENSG00000223843	EFCAB6-AS1	1.142675301	1
ENSG00000203965	EFCAB7	0.147884651	1
ENSG00000215529	EFCAB8	0.004072124	1
ENSG00000214360	EFCAB9	-0.314318754	1
ENSG00000114654	EFCC1	-0.06158649	1
ENSG00000115380	EFEMP1	-0.156126461	0.551284363
ENSG00000172638	EFEMP2	-1.749716394	9.38E-22
ENSG00000165487	EFHA1	-0.016816683	1
ENSG00000155970	EFHA2	-0.405272587	0.715872165
ENSG00000163576	EFHB	-0.016159984	1
ENSG00000096093	EFHC1	-0.240483974	0.0885106
ENSG00000183690	EFHC2	-1.025994135	6.85E-15
ENSG00000115468	EFHD1	0.629606001	0.80919972
ENSG00000142634	EFHD2	-0.246841721	0.087918041
ENSG00000169242	EFNA1	0.77189424	6.91E-06
ENSG00000099617	EFNA2	-1.953582776	0.00401844
ENSG00000143590	EFNA3	0.236831044	0.35290725
ENSG00000243364	EFNA4	-1.468220268	2.43E-10
ENSG00000184349	EFNA5	0.293894814	0.309331948
ENSG00000090776	EFNB1	0.294358448	0.108705077
ENSG00000125266	EFNB2	1.494030267	1
ENSG00000108947	EFNB3	-1.168435984	1.59E-10
ENSG00000132294	EFR3A	-0.524854536	2.95E-06
ENSG00000084710	EFR3B	-0.216518898	0.386342446
ENSG00000100842	EFS	1.968899115	1
ENSG00000140598	EFTUD1	0.381252675	0.016248002
ENSG00000259404	EFTUD1P1	0.679135629	0.011995797
ENSG00000248998	EFTUD1P2	0	1
ENSG00000108883	EFTUD2	0.465723402	1.03E-05
ENSG00000138798	EGF	-1.659499036	2.40E-07
ENSG00000206120	EGFEM1P	0.277256428	1
ENSG00000198759	EGFL6	-0.075996658	1
ENSG00000172889	EGFL7	-0.187481829	0.532096139
ENSG00000239974	EGFL8	0	1
ENSG00000240389	EGFL8	0	1
ENSG00000240592	EGFL8	0	1
ENSG00000241404	EGFL8	0.055754211	1
ENSG00000242038	EGFL8	0	1
ENSG00000243897	EGFL8	0	1
ENSG00000244444	EGFL8	0	1
ENSG00000164318	EGFLAM	0.413251543	0.003659537
ENSG00000249491	EGFLAM-AS1	0.206622174	1
ENSG00000248572	EGFLAM-AS2	0	1
ENSG00000249071	EGFLAM-AS3	0	1
ENSG00000248730	EGFLAM-AS4	0	1
ENSG00000146648	EGFR	0.230759482	0.33117217
ENSG00000224057	EGFR-AS1	0.529981595	1
ENSG00000135766	EGLN1	-0.175192778	0.632877469
ENSG00000254779	EGLN1P1	-0.123670087	1
ENSG00000269858	EGLN2	0.197398348	0.27285461
ENSG00000129521	EGLN3	-0.20304923	0.652147231
ENSG00000235947	EGOT	-0.468785376	1
ENSG00000120738	EGR1	3.442332761	7.41E-219
ENSG00000122877	EGR2	2.409767211	8.98E-06
ENSG00000179388	EGR3	1.064467247	0.422936739
ENSG00000135625	EGR4	4.624364477	9.92E-08
ENSG00000115504	EHBP1	0.005082208	1
ENSG00000173442	EHBP1L1	-1.140644281	1.16E-28
ENSG00000110047	EHD1	0.165814725	0.449746002
ENSG00000024422	EHD2	-2.226042743	1.01E-30
ENSG00000013016	EHD3	0.458356676	0.003731167
ENSG00000103966	EHD4	0.394209762	0.001806765
ENSG00000135373	EHF	1.644437701	0.688581822
ENSG00000113790	EHHADH	-0.150306802	1
ENSG00000223358	EHHADH-AS1	-0.234479736	1
ENSG00000181090	EHMT1	-0.126930258	0.775205232
ENSG00000204371	EHMT2	-0.267142599	0.050239857
ENSG00000206376	EHMT2	0	1
ENSG00000224143	EHMT2	0	1
ENSG00000227333	EHMT2	0	1
ENSG00000232045	EHMT2	0	1
ENSG00000236759	EHMT2	0	1
ENSG00000238134	EHMT2	0	1
ENSG00000237080	EHMT2-AS1	-0.529054898	0.052738168
ENSG00000149547	EI24	-0.00439768	1
ENSG00000236357	EI24P1	0.845655841	0.659332583
ENSG00000236257	EI24P2	-0.264047567	0.783919238
ENSG00000214825	EI24P3	-0.185322535	1
ENSG00000236343	EI24P4	-0.186340451	1
ENSG00000255302	EID1	-0.501732528	2.39E-05
ENSG00000176396	EID2	-0.443178275	0.015512314
ENSG00000176401	EID2B	-0.144698382	1
ENSG00000255150	EID3	1.549325029	0.18979533
ENSG00000173812	EIF1	0.245520951	0.06054846
ENSG00000175376	EIF1AD	0.252998148	0.159815751
ENSG00000173674	EIF1AX	0.312865889	0.043317255
ENSG00000225037	EIF1AX-AS1	1.968064759	1
ENSG00000236698	EIF1AXP1	0.478070943	0.003950312
ENSG00000258980	EIF1AXP2	0	1
ENSG00000198692	EIF1AY	-0.016863649	1
ENSG00000114784	EIF1B	0.114959579	1
ENSG00000144895	EIF2A	0.439660856	0.000327637
ENSG00000086232	EIF2AK1	-0.12585473	0.684243672
ENSG00000055332	EIF2AK2	-0.169034506	0.526417805
ENSG00000172071	EIF2AK3	-0.267836341	0.21695603
ENSG00000128829	EIF2AK4	-0.170981889	0.451107952
ENSG00000227395	EIF2AP4	0.582744337	1
ENSG00000111361	EIF2B1	0.2189203	0.182369759
ENSG00000119718	EIF2B2	0.422395413	0.000474958
ENSG00000070785	EIF2B3	0.838883869	2.03E-13
ENSG00000115211	EIF2B4	0.381118	0.004308859
ENSG00000145191	EIF2B5	0.061689449	1
ENSG00000230215	EIF2B5-AS1	0.206279569	1
ENSG00000227509	EIF2B5-IT1	0	1
ENSG00000092847	EIF2C1	0.764724834	8.96E-15
ENSG00000123908	EIF2C2	0.531847413	2.51E-07
ENSG00000126070	EIF2C3	0.08237857	1
ENSG00000134698	EIF2C4	-0.651777083	0.020127444
ENSG00000143486	EIF2D	0.096523443	1
ENSG00000134001	EIF2S1	0.290273685	0.018563552
ENSG00000125977	EIF2S2	0.18051904	0.341840331
ENSG00000229704	EIF2S2P2	-0.020845548	1
ENSG00000236493	EIF2S2P3	0.207953261	0.871372449
ENSG00000128692	EIF2S2P4	0.059833627	1
ENSG00000225650	EIF2S2P5	0.749959488	0.759942834
ENSG00000130741	EIF2S3	0.102910851	0.964264594
ENSG00000107581	EIF3A	0.123072294	0.684712996
ENSG00000106263	EIF3B	0.489684918	1.07E-06
ENSG00000184110	EIF3C	0.423567267	5.08E-05
ENSG00000205609	EIF3CL	0.447372789	1.68E-05
ENSG00000100353	EIF3D	0.115750805	0.75939249
ENSG00000104408	EIF3E	-0.059849877	1
ENSG00000234882	EIF3EP1	-0.15141218	0.609317851
ENSG00000224674	EIF3EP2	-1.7638988	0.783919238
ENSG00000175390	EIF3F	0.042698478	1
ENSG00000234643	EIF3FP1	-0.150061824	0.976314954
ENSG00000233426	EIF3FP3	-0.010700019	1
ENSG00000130811	EIF3G	0.370587728	0.001779963
ENSG00000147677	EIF3H	0.136552413	0.554911598
ENSG00000084623	EIF3I	0.325007914	0.004646204
ENSG00000237064	EIF3IP1	0.410535093	0.007306193
ENSG00000104131	EIF3J	0.638872236	2.12E-08
ENSG00000178982	EIF3K	0.292970602	0.026170014
ENSG00000175749	EIF3KP1	0.079285151	1
ENSG00000233544	EIF3KP2	0.058502223	1
ENSG00000250442	EIF3KP3	0.082487729	1
ENSG00000100129	EIF3L	-0.019569899	1
ENSG00000258501	EIF3LP1	0.01993367	1
ENSG00000233837	EIF3LP2	-0.020651577	1
ENSG00000226086	EIF3LP3	0.16838632	0.788143678
ENSG00000149100	EIF3M	0.261644613	0.053447247
ENSG00000161960	EIF4A1	0.094811567	0.929308575
ENSG00000233300	EIF4A1P1	0.021496311	1
ENSG00000229132	EIF4A1P10	0.037582095	1
ENSG00000231564	EIF4A1P11	0.478203559	0.664577757
ENSG00000257662	EIF4A1P12	0.202371604	1
ENSG00000225701	EIF4A1P13	0.513711	0.670047747
ENSG00000235001	EIF4A1P2	0.048824227	1
ENSG00000231018	EIF4A1P3	-0.12829268	1
ENSG00000226161	EIF4A1P5	-0.134464081	0.973215765
ENSG00000236608	EIF4A1P6	0.163768614	0.819265025
ENSG00000235472	EIF4A1P7	0.077804309	1
ENSG00000213484	EIF4A1P8	-0.299669251	0.795895151
ENSG00000262953	EIF4A1P9	-0.090269025	1
ENSG00000156976	EIF4A2	-0.006925927	1
ENSG00000141543	EIF4A3	0.572029027	4.94E-08
ENSG00000063046	EIF4B	-0.239349535	0.080147634
ENSG00000228753	EIF4BP2	-0.288077485	0.449746002
ENSG00000224546	EIF4BP3	-0.213221432	0.272170359
ENSG00000229572	EIF4BP4	-0.224876866	1
ENSG00000261336	EIF4BP5	-0.147950628	1
ENSG00000197258	EIF4BP6	-0.207450268	0.254466096
ENSG00000225031	EIF4BP7	-0.227397674	0.148514687
ENSG00000243918	EIF4BP8	-0.484544659	0.055323228
ENSG00000237294	EIF4BP9	-0.406477189	0.307100643
ENSG00000151247	EIF4E	0.208753275	0.261067802
ENSG00000175766	EIF4E1B	-0.294003109	1
ENSG00000135930	EIF4E2	0.165099947	0.485042431
ENSG00000213384	EIF4E2P1	-3.066779603	0.839452475
ENSG00000163412	EIF4E3	-0.026923215	1
ENSG00000187840	EIF4EBP1	0.315516988	0.014244631
ENSG00000258870	EIF4EBP1P1	0.475043061	1
ENSG00000229513	EIF4EBP1P2	0.192496713	1
ENSG00000148730	EIF4EBP2	-0.664754493	3.99E-07
ENSG00000233711	EIF4EBP2P	-1.790042574	1
ENSG00000243056	EIF4EBP3	0.286324056	0.937492299
ENSG00000184708	EIF4ENIF1	0.015872919	1
ENSG00000114867	EIF4G1	0.172691846	0.273083876
ENSG00000110321	EIF4G2	-0.10369844	0.839452475
ENSG00000075151	EIF4G3	-0.01582719	1
ENSG00000106682	EIF4H	0.068521655	1
ENSG00000100664	EIF5	0.081501604	1
ENSG00000132507	EIF5A	0.031210282	1
ENSG00000163577	EIF5A2	0.661996317	0.000198727
ENSG00000253626	EIF5AL1	0.110927171	0.83688998
ENSG00000267679	EIF5AP2	-0.002654489	1
ENSG00000267346	EIF5AP3	0.372970228	1
ENSG00000234743	EIF5AP4	0.16969345	0.376970236
ENSG00000158417	EIF5B	0.393482969	0.000354972
ENSG00000242372	EIF6	0.340521279	0.002980584
ENSG00000141642	ELAC1	-0.751347455	0.124405864
ENSG00000006744	ELAC2	0.415474361	0.000306816
ENSG00000197561	ELANE	3.283241606	0.839452475
ENSG00000066044	ELAVL1	0.159699571	0.44683905
ENSG00000107105	ELAVL2	-0.198581132	1
ENSG00000196361	ELAVL3	-0.469053778	1
ENSG00000162374	ELAVL4	0.871438163	0.216405531
ENSG00000120690	ELF1	-0.04605433	1
ENSG00000109381	ELF2	0.259532396	0.059184693
ENSG00000163435	ELF3	-0.708954581	1
ENSG00000102034	ELF4	-0.116574254	0.911827526
ENSG00000135374	ELF5	1.85586847	0.488772154
ENSG00000225968	ELFN1	-0.937673174	1.77E-12
ENSG00000166897	ELFN2	-0.569458245	1.01E-06
ENSG00000126767	ELK1	-0.118652437	0.881088702
ENSG00000234359	ELK1P1	-1.206252376	0.922847702
ENSG00000213140	ELK2AP	-0.235750001	1
ENSG00000234402	ELK2BP	0.356749417	1
ENSG00000111145	ELK3	-0.200236847	0.290021287
ENSG00000158711	ELK4	-0.491523876	0.000182264
ENSG00000105656	ELL	1.07941244	1.85E-18
ENSG00000118985	ELL2	0.488128772	0.000204086
ENSG00000227295	ELL2P1	0.639638303	0.00254999
ENSG00000251051	ELL2P2	0	1
ENSG00000234765	ELL2P3	0	1
ENSG00000226388	ELL2P4	0	1
ENSG00000128886	ELL3	0.031334702	1
ENSG00000155849	ELMO1	0.201863231	0.98016111
ENSG00000224101	ELMO1-AS1	-0.596953049	1
ENSG00000062598	ELMO2	-0.18500334	0.441483563
ENSG00000259400	ELMO2P1	0.074241005	1
ENSG00000102890	ELMO3	0.086218564	1
ENSG00000110675	ELMOD1	0.625309207	0.223656892
ENSG00000179387	ELMOD2	-0.150855084	1
ENSG00000115459	ELMOD3	-0.135979357	0.99291541
ENSG00000156030	ELMSAN1	0.502448967	2.00E-06
ENSG00000049540	ELN	-0.248924398	1
ENSG00000130165	ELOF1	1.098042131	3.10E-21
ENSG00000066322	ELOVL1	-0.225109066	0.131904963
ENSG00000197977	ELOVL2	0.982283966	0.663237425
ENSG00000230314	ELOVL2-AS1	0.87032938	1
ENSG00000119915	ELOVL3	1.968064759	1
ENSG00000118402	ELOVL4	0.063675677	1
ENSG00000012660	ELOVL5	-0.249505133	0.069428553
ENSG00000170522	ELOVL6	0.343002447	0.014023256
ENSG00000164181	ELOVL7	-0.224599263	0.725959204
ENSG00000134759	ELP2	0.394911916	0.005072096
ENSG00000134014	ELP3	0.285953142	0.076036576
ENSG00000109911	ELP4	-0.596335401	0.010156935
ENSG00000170291	ELP5	0.047911508	1
ENSG00000163832	ELP6	-0.14853073	0.818704476
ENSG00000169393	ELSPBP1	-0.525376434	1
ENSG00000162618	ELTD1	-0.74880416	0.084206505
ENSG00000170571	EMB	-0.210290942	0.450819393
ENSG00000231752	EMBP1	-0.205643412	1
ENSG00000127463	EMC1	0.113907058	0.825885049
ENSG00000161671	EMC10	-0.345889008	0.007684068
ENSG00000104412	EMC2	0.282437058	0.183630953
ENSG00000125037	EMC3	0.271361661	0.057878367
ENSG00000128463	EMC4	0.18401576	0.474401349
ENSG00000127774	EMC6	0.298707251	0.145687426
ENSG00000134153	EMC7	0.246036731	0.211502349
ENSG00000131148	EMC8	0.323570106	0.024603174
ENSG00000100908	EMC9	0.206907133	0.733042639
ENSG00000164035	EMCN	0.607864111	0.474401349
ENSG00000251636	EMCN-IT1	0	1
ENSG00000251219	EMCN-IT2	-1.789943949	1
ENSG00000250223	EMCN-IT3	1.494128893	1
ENSG00000102119	EMD	-0.249341724	0.127390004
ENSG00000154920	EME1	-0.034660533	1
ENSG00000197774	EME2	0.288826648	0.055763532
ENSG00000126749	EMG1	0.116929826	0.814259137
ENSG00000186998	EMID1	-0.638288167	0.261916983
ENSG00000138080	EMILIN1	-0.182280028	1
ENSG00000132205	EMILIN2	0.648341931	1.55E-06
ENSG00000183798	EMILIN3	-0.644509031	0.133311355
ENSG00000066629	EML1	0.210936363	0.711738425
ENSG00000125746	EML2	0.091382278	1
ENSG00000149499	EML3	0.275380827	0.056644906
ENSG00000143924	EML4	0.353900472	0.003241078
ENSG00000165521	EML5	-0.003289512	1
ENSG00000214595	EML6	-0.324148009	0.099959585
ENSG00000134531	EMP1	-1.298787793	3.46E-24
ENSG00000213853	EMP2	-0.354095679	0.011289912
ENSG00000142227	EMP3	-0.669158265	5.49E-09
ENSG00000174837	EMR1	-0.106569517	1
ENSG00000127507	EMR2	0.955809237	1.07E-09
ENSG00000131355	EMR3	-0.629499204	5.50E-10
ENSG00000268758	EMR4P	0.671917187	1
ENSG00000135638	EMX1	-1.07005904	0.013424054
ENSG00000170370	EMX2	-0.506663075	0.474158914
ENSG00000229847	EMX2OS	-1.035232747	0.06469754
ENSG00000163064	EN1	-1.097863258	0.151272525
ENSG00000164778	EN2	1.126601745	8.34E-05
ENSG00000154380	ENAH	-0.360430646	0.002935745
ENSG00000132464	ENAM	1.285416096	0.216808288
ENSG00000171617	ENC1	-0.220211926	0.275036572
ENSG00000149218	ENDOD1	-0.049616428	1
ENSG00000167136	ENDOG	0.296941558	0.078042384
ENSG00000111405	ENDOU	1.289777	0.249415248
ENSG00000173818	ENDOV	-0.208896929	0.563508448
ENSG00000106991	ENG	0.14773213	0.778638403
ENSG00000167280	ENGASE	-0.199535639	0.387547611
ENSG00000168913	ENHO	-0.064048685	1
ENSG00000124074	ENKD1	0.535583372	0.00026842
ENSG00000151023	ENKUR	-0.02391339	1
ENSG00000074800	ENO1	-0.107008376	0.788458044
ENSG00000230679	ENO1-AS1	0.506245703	1
ENSG00000236269	ENO1-IT1	0.84849186	0.712824192
ENSG00000244457	ENO1P1	-0.165170144	0.333043958
ENSG00000258739	ENO1P2	0.200367371	1
ENSG00000243986	ENO1P3	0	1
ENSG00000241790	ENO1P4	-0.076126629	1
ENSG00000111674	ENO2	-0.629942305	2.23E-09
ENSG00000108515	ENO3	-0.345660696	0.002833781
ENSG00000188316	ENO4	-0.198718358	0.487436443
ENSG00000145293	ENOPH1	0.54212092	4.61E-06
ENSG00000132199	ENOSF1	-0.449029637	0.000154891
ENSG00000120658	ENOX1	1.366541639	2.72E-06
ENSG00000233821	ENOX1-AS1	0	1
ENSG00000238189	ENOX1-AS2	0	1
ENSG00000165675	ENOX2	-0.037949656	1
ENSG00000138792	ENPEP	0.138811275	1
ENSG00000197594	ENPP1	-0.235647641	0.726683995
ENSG00000136960	ENPP2	-0.727724256	0.142860221
ENSG00000154269	ENPP3	-0.3679759	1
ENSG00000001561	ENPP4	-0.014999165	1
ENSG00000112796	ENPP5	-0.952906124	0.150125946
ENSG00000164303	ENPP6	0.673086718	1
ENSG00000182156	ENPP7	-1.789943949	1
ENSG00000143420	ENSA	-0.372046964	0.002183624
ENSG00000224274	ENSAP1	1.493297657	1
ENSG00000259032	ENSAP2	-0.638572249	0.000508984
ENSG00000177261	ENSAP3	0.313334225	1
ENSG00000176177	ENTHD1	0.091741583	1
ENSG00000167302	ENTHD2	0.384240326	0.007325547
ENSG00000138185	ENTPD1	0.686281166	2.68E-06
ENSG00000054179	ENTPD2	0	1
ENSG00000168032	ENTPD3	-0.824114646	0.922847702
ENSG00000223797	ENTPD3-AS1	-0.496821014	0.500076661
ENSG00000197217	ENTPD4	-0.314734313	0.019974195
ENSG00000187097	ENTPD5	-0.35084406	0.010441583
ENSG00000197586	ENTPD6	0.015539747	1
ENSG00000198018	ENTPD7	0.443312463	0.008278328
ENSG00000188833	ENTPD8	-1.549795104	0.024363318
ENSG00000120533	ENY2	-0.096313052	1
ENSG00000163378	EOGT	-0.251294546	0.254609062
ENSG00000163508	EOMES	-2.565116257	1
ENSG00000100393	EP300	0.19466041	0.246269861
ENSG00000183495	EP400	0.245508319	0.069629732
ENSG00000185684	EP400NL	-0.007676155	1
ENSG00000116016	EPAS1	-0.533239328	0.000523472
ENSG00000159023	EPB41	0.059261891	1
ENSG00000088367	EPB41L1	-0.0707633	1
ENSG00000079819	EPB41L2	-0.615016138	3.90E-09
ENSG00000082397	EPB41L3	-0.099753895	0.961932727
ENSG00000129595	EPB41L4A	0.933879412	2.40E-11
ENSG00000224032	EPB41L4A-AS1	1.099909322	9.30E-14
ENSG00000095203	EPB41L4B	1.069010663	1.82E-12
ENSG00000115109	EPB41L5	0.093052099	1
ENSG00000166947	EPB42	-0.104709574	1
ENSG00000158856	EPB49	-0.919110145	3.07E-11
ENSG00000120616	EPC1	0.147786453	0.73286875
ENSG00000135999	EPC2	0.190292188	0.556812737
ENSG00000119888	EPCAM	0.492949237	0.132248343
ENSG00000086289	EPDR1	-0.741566418	2.87E-06
ENSG00000152223	EPG5	-0.182882407	0.374744775
ENSG00000182585	EPGN	0	1
ENSG00000146904	EPHA1	-0.143282064	0.660092901
ENSG00000229153	EPHA1-AS1	-0.147271469	1
ENSG00000183317	EPHA10	-0.633699789	0.436609959
ENSG00000142627	EPHA2	0.535929178	4.73E-07
ENSG00000044524	EPHA3	-0.06702452	1
ENSG00000116106	EPHA4	0.575137609	0.432877922
ENSG00000145242	EPHA5	-0.108384034	0.869826345
ENSG00000080224	EPHA6	-0.10242733	1
ENSG00000135333	EPHA7	0.769265783	1
ENSG00000070886	EPHA8	2.551227792	2.52E-57
ENSG00000154928	EPHB1	-0.63596576	0.04531082
ENSG00000133216	EPHB2	-0.869820885	2.17E-15
ENSG00000182580	EPHB3	-1.08927325	0.001040093
ENSG00000196411	EPHB4	0.06375727	1
ENSG00000106123	EPHB6	-1.781596224	1.32E-15
ENSG00000143819	EPHX1	-0.216788303	0.627540779
ENSG00000120915	EPHX2	-0.147130125	1
ENSG00000105131	EPHX3	1.396598819	1
ENSG00000172031	EPHX4	0.22453851	1
ENSG00000112425	EPM2A	0.192818514	1
ENSG00000178567	EPM2AIP1	-0.555959236	0.000171953
ENSG00000063245	EPN1	-0.26335914	0.075492732
ENSG00000072134	EPN2	0.194326963	0.344545233
ENSG00000235397	EPN2-AS1	0.22954012	1
ENSG00000049283	EPN3	-0.809288693	0.033204206
ENSG00000130427	EPO	-0.294199527	1
ENSG00000187266	EPOR	-0.442149423	0.079619337
ENSG00000101448	EPPIN	0	1
ENSG00000249139	EPPIN-WFDC6	0	1
ENSG00000227184	EPPK1	-0.009825806	1
ENSG00000136628	EPRS	0.056646213	1
ENSG00000085832	EPS15	-0.017362703	1
ENSG00000127527	EPS15L1	0.249954486	0.125015098
ENSG00000242948	EPS15P1	-0.597051498	1
ENSG00000151491	EPS8	-0.275138504	0.22088741
ENSG00000131037	EPS8L1	-5.146605438	0.003327651
ENSG00000177106	EPS8L2	-0.892794325	1.17E-13
ENSG00000198758	EPS8L3	0	1
ENSG00000133106	EPSTI1	-0.128971009	1
ENSG00000138018	EPT1	0.479830798	4.55E-05
ENSG00000121053	EPX	0.395978287	1
ENSG00000083782	EPYC	-0.665676564	1
ENSG00000120160	EQTN	0	1
ENSG00000132591	ERAL1	0.171909506	0.456010427
ENSG00000164307	ERAP1	-0.60253052	9.33E-08
ENSG00000164308	ERAP2	-0.668648063	0.077307393
ENSG00000187682	ERAS	-1.790042574	1
ENSG00000141736	ERBB2	-0.569200487	1.22E-06
ENSG00000112851	ERBB2IP	-1.294817798	1.84E-38
ENSG00000065361	ERBB3	-1.0431707	4.81E-06
ENSG00000178568	ERBB4	0.071029477	1
ENSG00000082805	ERC1	-0.553428036	4.20E-07
ENSG00000187672	ERC2	0.832616187	0.000131815
ENSG00000012061	ERCC1	0.416569759	0.000580386
ENSG00000104884	ERCC2	0.456429168	0.000254442
ENSG00000163161	ERCC3	0.417516996	0.00058014
ENSG00000175595	ERCC4	0.105803989	1
ENSG00000134899	ERCC5	-0.391157865	0.223491864
ENSG00000225830	ERCC6	0.301480706	0.121941556
ENSG00000186871	ERCC6L	-0.608712403	2.81E-05
ENSG00000182150	ERCC6L2	-0.017817022	1
ENSG00000049167	ERCC8	0.202297445	0.571935879
ENSG00000124882	EREG	0.898143871	0.670047747
ENSG00000105722	ERF	0.188003395	0.27285461
ENSG00000157554	ERG	0.708646075	0.000253616
ENSG00000113719	ERGIC1	-0.349605157	0.002976626
ENSG00000087502	ERGIC2	0.08359585	1
ENSG00000125991	ERGIC3	-0.087317525	1
ENSG00000100632	ERH	-0.047874016	1
ENSG00000254270	ERHP1	-0.120460625	1
ENSG00000218143	ERHP2	-2.564566651	1
ENSG00000104626	ERI1	0.069689717	1
ENSG00000196678	ERI2	0.121702083	1
ENSG00000117419	ERI3	-0.072564898	1
ENSG00000233602	ERI3-IT1	-0.447197846	1
ENSG00000104714	ERICH1	0.914661471	8.57E-09
ENSG00000237647	ERICH1-AS1	0.784840556	0.245322459
ENSG00000204334	ERICH2	-0.153830614	1
ENSG00000068912	ERLEC1	-0.057617802	1
ENSG00000240755	ERLEC1P1	0	1
ENSG00000107566	ERLIN1	-0.17668888	0.338021096
ENSG00000147475	ERLIN2	-0.288032085	0.094744512
ENSG00000164010	ERMAP	0.293597561	0.196767153
ENSG00000136541	ERMN	0	1
ENSG00000099219	ERMP1	0.015582871	1
ENSG00000178607	ERN1	1.055436283	5.00E-13
ENSG00000134398	ERN2	0.486690987	0.745871106
ENSG00000197930	ERO1L	-0.149777351	0.570489578
ENSG00000086619	ERO1LB	1.468761848	9.09E-06
ENSG00000139055	ERP27	-0.667497827	1
ENSG00000089248	ERP29	-0.395848369	0.000643199
ENSG00000233347	ERP29P1	-0.398623897	0.089493291
ENSG00000023318	ERP44	-0.039252693	1
ENSG00000116285	ERRFI1	0.697453412	7.59E-11
ENSG00000213462	ERV3-1	-0.351016144	0.783919238
ENSG00000244476	ERVFRD-1	0.17757022	1
ENSG00000233056	ERVH48-1	-0.903262814	1
ENSG00000260565	ERVK13-1	-0.313465269	0.471654031
ENSG00000142396	ERVK3-1	0.589967066	6.27E-06
ENSG00000226887	ERVMER34-1	0.468416033	0.002224604
ENSG00000230426	ERVMER61-1	-2.56466507	1
ENSG00000269526	ERVV-1	-0.596953049	1
ENSG00000268964	ERVV-2	-0.833466678	1
ENSG00000242950	ERVW-1	-0.596600311	1
ENSG00000149564	ESAM	-2.039785275	0.146127097
ENSG00000141446	ESCO1	0.246119778	0.532376554
ENSG00000171320	ESCO2	-0.40351549	0.003581112
ENSG00000139684	ESD	-0.265269605	0.133746639
ENSG00000089048	ESF1	0.691698497	5.09E-06
ENSG00000164283	ESM1	0.801633422	0.153832713
ENSG00000135476	ESPL1	-0.394854876	0.000571941
ENSG00000187017	ESPN	-0.562574117	0.727528922
ENSG00000144488	ESPNL	-1.298008385	0.290021287
ENSG00000268869	ESPNP	-0.698333397	0.107164061
ENSG00000091831	ESR1	-0.382343892	0.233875454
ENSG00000140009	ESR2	-1.18622234	3.02E-13
ENSG00000265992	ESRG	-0.943006738	0.326431457
ENSG00000104413	ESRP1	-0.539690883	1
ENSG00000103067	ESRP2	0.396064069	1
ENSG00000173153	ESRRA	0.594534975	4.92E-07
ENSG00000215572	ESRRAP1	0.480385746	0.089756188
ENSG00000235438	ESRRAP2	0.536160277	0.135247474
ENSG00000119715	ESRRB	1.078387722	2.04E-06
ENSG00000196482	ESRRG	0.6632391	0.559446927
ENSG00000123576	ESX1	0	1
ENSG00000139641	ESYT1	-0.438720948	5.57E-05
ENSG00000117868	ESYT2	-0.060112773	1
ENSG00000158220	ESYT3	0.868340542	4.78E-05
ENSG00000143971	ETAA1	-0.276032894	0.366337837
ENSG00000120705	ETF1	0.543449227	2.03E-07
ENSG00000223996	ETF1P1	0	1
ENSG00000224108	ETF1P1	0	1
ENSG00000228765	ETF1P1	0	1
ENSG00000232141	ETF1P1	0	1
ENSG00000232516	ETF1P1	0	1
ENSG00000232757	ETF1P1	-0.138853463	1
ENSG00000235372	ETF1P1	0	1
ENSG00000235764	ETF1P1	0	1
ENSG00000240132	ETF1P2	0.31629877	0.126772861
ENSG00000140374	ETFA	0.12935842	0.745445334
ENSG00000105379	ETFB	-0.527591959	0.000206045
ENSG00000171503	ETFDH	0.339805416	0.222690996
ENSG00000105755	ETHE1	-0.593239562	0.001394561
ENSG00000139163	ETNK1	0.331637011	0.056581308
ENSG00000143845	ETNK2	-1.009588741	1.20E-11
ENSG00000134954	ETS1	-0.37541702	0.001281991
ENSG00000157557	ETS2	0.125838209	1
ENSG00000006468	ETV1	-0.334640004	1
ENSG00000105672	ETV2	-0.477277494	1
ENSG00000117036	ETV3	0.461381961	0.00070055
ENSG00000253831	ETV3L	-0.115276469	1
ENSG00000175832	ETV4	0.900920655	1.08E-16
ENSG00000244405	ETV5	0.486774953	0.000505853
ENSG00000234197	ETV5-AS1	0.592010637	0.517479829
ENSG00000139083	ETV6	-0.629506612	0.000137168
ENSG00000010030	ETV7	-0.172900137	1
ENSG00000115363	EVA1A	-0.738063269	4.06E-08
ENSG00000142694	EVA1B	-0.086662247	1
ENSG00000166979	EVA1C	0.17158868	1
ENSG00000072840	EVC	-0.709657502	6.20E-08
ENSG00000173040	EVC2	0.492782246	1
ENSG00000126860	EVI2A	-1.360077237	0.03709363
ENSG00000185862	EVI2B	0.218782006	1
ENSG00000067208	EVI5	0.588503226	0.000719849
ENSG00000142459	EVI5L	-1.465585259	4.25E-06
ENSG00000196405	EVL	0.375233357	0.149997457
ENSG00000167880	EVPL	0.023993754	1
ENSG00000214860	EVPLL	-3.066132573	0.839452475
ENSG00000106038	EVX1	1.968064759	1
ENSG00000253405	EVX1-AS	0	1
ENSG00000174279	EVX2	0	1
ENSG00000182944	EWSR1	-0.014981188	1
ENSG00000178997	EXD1	-0.290463298	1
ENSG00000081177	EXD2	-0.238061776	0.434635224
ENSG00000187609	EXD3	-0.380749327	0.290021287
ENSG00000174371	EXO1	0.128040114	0.947997289
ENSG00000164002	EXO5	-0.147681948	0.970412985
ENSG00000090989	EXOC1	-0.097015621	1
ENSG00000112685	EXOC2	-0.345859213	0.081727331
ENSG00000180104	EXOC3	0.245394141	0.07551898
ENSG00000179044	EXOC3L1	-2.402182365	0.223872325
ENSG00000130201	EXOC3L2	0.798211128	0.87943317
ENSG00000205436	EXOC3L4	0.21863442	1
ENSG00000131558	EXOC4	-0.269552194	0.080866257
ENSG00000070367	EXOC5	-0.41685899	0.001879991
ENSG00000180673	EXOC5P1	-0.374727134	0.094098283
ENSG00000138190	EXOC6	-0.098315027	1
ENSG00000144036	EXOC6B	-0.472973994	0.001413713
ENSG00000182473	EXOC7	-0.091368422	0.997345869
ENSG00000250485	EXOC7P1	-0.597500264	0.402519286
ENSG00000116903	EXOC8	0.327314512	0.167075651
ENSG00000157036	EXOG	0.008168037	1
ENSG00000263748	EXOGP1	0.178404576	1
ENSG00000171311	EXOSC1	-0.02267194	1
ENSG00000171824	EXOSC10	0.098844614	0.981763898
ENSG00000130713	EXOSC2	0.143353005	0.752222894
ENSG00000107371	EXOSC3	0.351050584	0.009943615
ENSG00000229007	EXOSC3P1	0.258877887	1
ENSG00000269763	EXOSC3P2	0.842882718	0.46189204
ENSG00000178896	EXOSC4	0.644580263	1.37E-08
ENSG00000077348	EXOSC5	0.745985116	1.22E-08
ENSG00000223496	EXOSC6	0.019231261	1
ENSG00000075914	EXOSC7	0.512895771	3.84E-05
ENSG00000120699	EXOSC8	-0.025173753	1
ENSG00000123737	EXOSC9	0.200173018	0.341797624
ENSG00000110723	EXPH5	-0.250320465	0.618786268
ENSG00000182197	EXT1	-0.68358601	1.32E-10
ENSG00000151348	EXT2	-0.231439322	0.103315637
ENSG00000158008	EXTL1	0.469915979	1
ENSG00000162694	EXTL2	-0.142992141	0.946547211
ENSG00000223976	EXTL2P1	-3.437551743	0.530426505
ENSG00000012232	EXTL3	-0.061367971	1
ENSG00000246339	EXTL3-AS1	-0.164093158	1
ENSG00000104313	EYA1	-1.213484468	7.12E-06
ENSG00000064655	EYA2	0.026719954	1
ENSG00000158161	EYA3	0.254825824	0.138874237
ENSG00000237895	EYA3-IT1	-1.468358536	1
ENSG00000112319	EYA4	-0.1759681	0.910134795
ENSG00000188107	EYS	0.036026117	1
ENSG00000108799	EZH1	0.002229032	1
ENSG00000106462	EZH2	-0.169073677	0.755487183
ENSG00000231300	EZH2P1	-0.507506826	0.82278999
ENSG00000092820	EZR	-0.044730662	1
ENSG00000233893	EZR-AS1	0.300085718	0.31808608
ENSG00000126218	F10	0.278480885	1
ENSG00000231882	F10-AS1	0.178464133	1
ENSG00000088926	F11	1.968408083	1
ENSG00000158769	F11R	0.29706229	0.224017506
ENSG00000131187	F12	0.47679454	0.004785341
ENSG00000124491	F13A1	-1.103452619	0.139833432
ENSG00000143278	F13B	-1.098273248	1
ENSG00000180210	F2	0.049441895	1
ENSG00000181104	F2R	-0.64925177	0.000113555
ENSG00000164251	F2RL1	0.439799919	0.004885017
ENSG00000164220	F2RL2	-0.674935056	0.000503269
ENSG00000127533	F2RL3	1.968408083	1
ENSG00000117525	F3	-0.585039214	0.000944803
ENSG00000198734	F5	-0.043360418	1
ENSG00000057593	F7	-1.790042574	1
ENSG00000185010	F8	-0.577196125	0.000832749
ENSG00000197932	F8A1	-0.660536627	0.01291559
ENSG00000198444	F8A2	-0.790065815	0.001257547
ENSG00000185990	F8A3	-0.719160021	0.000282729
ENSG00000101981	F9	1.968408083	1
ENSG00000103089	FA2H	0.235351773	1
ENSG00000117480	FAAH	0.472997505	0.524362841
ENSG00000165591	FAAH2	0.017869154	1
ENSG00000163586	FABP1	0	1
ENSG00000197416	FABP12	0.178955165	1
ENSG00000145384	FABP2	1.968064759	1
ENSG00000121769	FABP3	-0.362130748	0.926069059
ENSG00000233259	FABP3P2	0	1
ENSG00000170323	FABP4	-1.097519262	1
ENSG00000164687	FABP5	0.816041733	2.06E-14
ENSG00000236972	FABP5P1	0.725776917	1.72E-08
ENSG00000213201	FABP5P10	0.986440976	0.006238387
ENSG00000240122	FABP5P11	0.621414526	0.001083411
ENSG00000249367	FABP5P12	0.500450604	0.946547211
ENSG00000234958	FABP5P13	0.719407772	1
ENSG00000234588	FABP5P14	0	1
ENSG00000237106	FABP5P15	0	1
ENSG00000236044	FABP5P2	0.681653868	2.58E-07
ENSG00000241735	FABP5P3	0.82791077	2.05E-05
ENSG00000229287	FABP5P4	0.575535928	1
ENSG00000213716	FABP5P5	0	1
ENSG00000249919	FABP5P6	0	1
ENSG00000234964	FABP5P7	0.755665543	4.48E-11
ENSG00000170231	FABP6	1.20351926	0.008889875
ENSG00000164434	FABP7	0	1
ENSG00000226766	FABP7P1	0	1
ENSG00000235129	FABP7P2	0	1
ENSG00000205186	FABP9	0	1
ENSG00000168040	FADD	-0.252149252	0.174353491
ENSG00000149485	FADS1	-1.121350856	2.95E-28
ENSG00000134824	FADS2	-0.858735173	3.15E-19
ENSG00000221968	FADS3	-0.313968155	0.01732353
ENSG00000172782	FADS6	1.328704345	0.597492478
ENSG00000185104	FAF1	0.163785388	0.513925872
ENSG00000113194	FAF2	-0.033430887	1
ENSG00000103876	FAH	0.455362636	0.00045508
ENSG00000180185	FAHD1	0.230518396	0.312073247
ENSG00000115042	FAHD2A	0.061223218	1
ENSG00000144199	FAHD2B	0.209706081	0.40523931
ENSG00000231584	FAHD2CP	-0.140207234	1
ENSG00000257302	FAHD2P1	0.280003128	0.824149106
ENSG00000158234	FAIM	0.170555713	1
ENSG00000135472	FAIM2	-1.789943949	1
ENSG00000162894	FAIM3	-0.228079686	0.546977305
ENSG00000178882	FAM101A	-3.066779603	0.839452475
ENSG00000183688	FAM101B	-0.076898448	1
ENSG00000167106	FAM102A	-0.268856358	0.116525956
ENSG00000162636	FAM102B	-1.046388978	2.76E-12
ENSG00000169612	FAM103A1	0.272502877	0.249415248
ENSG00000235272	FAM103A2P	0.068401475	1
ENSG00000133193	FAM104A	0.031889126	1
ENSG00000182518	FAM104B	-0.301545947	0.361523196
ENSG00000145569	FAM105A	-0.112499784	1
ENSG00000154124	FAM105B	0.118899723	0.839452475
ENSG00000213077	FAM106A	0.425027359	1
ENSG00000205217	FAM106B	0.770919265	1
ENSG00000266486	FAM106CP	2.170392829	0.783919238
ENSG00000266960	FAM106DP	0.178464133	1
ENSG00000168309	FAM107A	-1.1129504	0.422936739
ENSG00000065809	FAM107B	0.473529053	0.0012104
ENSG00000129968	FAM108A1	0.083995904	1
ENSG00000261536	FAM108A10P	-0.110383792	1
ENSG00000203835	FAM108A2	0.272045112	0.624264305
ENSG00000198658	FAM108A3P	0.033236356	1
ENSG00000250536	FAM108A4P	0.151734794	1
ENSG00000229107	FAM108A5P	0.017710732	1
ENSG00000182502	FAM108A6P	-0.617985149	0.093629915
ENSG00000226981	FAM108A7P	-0.230766388	0.629282369
ENSG00000260864	FAM108A8P	1.096782662	1
ENSG00000260540	FAM108A9P	-0.017262121	1
ENSG00000107362	FAM108B1	0.286483582	0.363101092
ENSG00000136379	FAM108C1	0.784432175	9.86E-07
ENSG00000198324	FAM109A	0.140622785	0.973464169
ENSG00000177096	FAM109B	-0.756068521	0.001394561
ENSG00000125898	FAM110A	-0.298379283	0.103852647
ENSG00000169122	FAM110B	0.289348501	0.463139178
ENSG00000184731	FAM110C	-1.08096112	0.015362261
ENSG00000197245	FAM110D	-1.141390329	0.187708302
ENSG00000166801	FAM111A	-1.315817047	8.45E-27
ENSG00000189057	FAM111B	-1.231603601	7.12E-21
ENSG00000197712	FAM114A1	-1.392725229	6.52E-20
ENSG00000055147	FAM114A2	-0.370904394	0.147810356
ENSG00000198420	FAM115A	-1.289248661	2.66E-18
ENSG00000223459	FAM115B	-1.179501591	1.09E-09
ENSG00000170379	FAM115C	0.05046198	1
ENSG00000159860	FAM115D	-0.065597707	1
ENSG00000121104	FAM117A	0.162977478	1
ENSG00000138439	FAM117B	1.114122009	9.15E-13
ENSG00000100376	FAM118A	0.399426293	0.001892778
ENSG00000197798	FAM118B	0.268148056	0.271728403
ENSG00000048828	FAM120A	0.04489071	1
ENSG00000188938	FAM120AOS	0.064726754	1
ENSG00000112584	FAM120B	-0.358614416	0.032674828
ENSG00000184083	FAM120C	0.001126044	1
ENSG00000187866	FAM122A	-0.131886222	1
ENSG00000156504	FAM122B	-0.291455458	0.105906686
ENSG00000156500	FAM122C	-0.226747112	1
ENSG00000150510	FAM124A	0.147526376	1
ENSG00000124019	FAM124B	0.981293816	1
ENSG00000122591	FAM126A	-0.327890387	0.07978707
ENSG00000155744	FAM126B	-0.015324334	1
ENSG00000134590	FAM127A	-0.718521675	5.04E-08
ENSG00000203950	FAM127B	-0.379162719	0.016339567
ENSG00000212747	FAM127C	-0.210624412	0.688581822
ENSG00000135842	FAM129A	-0.024967493	1
ENSG00000136830	FAM129B	-0.184757688	0.272813956
ENSG00000167483	FAM129C	-0.053435861	1
ENSG00000175182	FAM131A	-0.248047606	0.839263315
ENSG00000159784	FAM131B	-0.973816411	0.104073246
ENSG00000185519	FAM131C	1.062280971	1.80E-07
ENSG00000184163	FAM132A	-1.443077272	5.09E-07
ENSG00000178752	FAM132B	0.750072762	0.00201046
ENSG00000179083	FAM133A	-1.148091578	0.688581822
ENSG00000234545	FAM133B	0.202579842	0.814259137
ENSG00000183055	FAM133CP	-0.110369615	1
ENSG00000230562	FAM133DP	0.476296368	0.460128212
ENSG00000144567	FAM134A	-0.565485644	4.82E-07
ENSG00000154153	FAM134B	-1.208991573	0.001634053
ENSG00000141699	FAM134C	-0.417496124	0.002652209
ENSG00000082269	FAM135A	0.650027308	1.96E-05
ENSG00000147724	FAM135B	1.153055039	0.000144035
ENSG00000035141	FAM136A	0.580850253	8.97E-08
ENSG00000232654	FAM136BP	0.378276552	0.410588959
ENSG00000237613	FAM138A	0	1
ENSG00000226516	FAM138B	0.205828412	1
ENSG00000218839	FAM138C	0	1
ENSG00000206114	FAM138D	0	1
ENSG00000248893	FAM138E	-2.56446824	1
ENSG00000233630	FAM138F	0	1
ENSG00000138640	FAM13A	0.175740098	0.643442461
ENSG00000248019	FAM13A-AS1	-0.435955675	0.176093421
ENSG00000031003	FAM13B	-0.020272791	1
ENSG00000148541	FAM13C	-0.191337947	1
ENSG00000109794	FAM149A	0.703195892	0.047052471
ENSG00000138286	FAM149B1	-0.540319019	4.01E-05
ENSG00000214424	FAM149B1P1	-0.696360096	0.554136529
ENSG00000196711	FAM150A	-0.153322678	1
ENSG00000189292	FAM150B	0.848158065	0.712824192
ENSG00000162391	FAM151A	-0.082656738	1
ENSG00000152380	FAM151B	-0.257399789	0.637283334
ENSG00000170074	FAM153A	-0.523214425	0.384034528
ENSG00000182230	FAM153B	-0.054592847	1
ENSG00000204677	FAM153C	-0.247739151	1
ENSG00000155875	FAM154A	-0.157246521	0.670047747
ENSG00000188659	FAM154B	0.650940035	0.63642963
ENSG00000204442	FAM155A	-0.071091131	1
ENSG00000227248	FAM155A-IT1	-0.597502825	1
ENSG00000130054	FAM155B	0.789645365	0.954120814
ENSG00000182646	FAM156A	0.295352392	0.088973333
ENSG00000179304	FAM156B	0.194475849	0.427608621
ENSG00000236438	FAM157A	0.072934285	1
ENSG00000233013	FAM157B	0.164824155	1
ENSG00000260528	FAM157C	0.424041526	0.01168627
ENSG00000182183	FAM159A	1.03431609	0.688581822
ENSG00000145642	FAM159B	0.415560761	1
ENSG00000164142	FAM160A1	-0.266746619	0.577725862
ENSG00000051009	FAM160A2	0.322938917	0.087240926
ENSG00000151553	FAM160B1	-0.226534311	0.755642866
ENSG00000158863	FAM160B2	-0.281015656	0.039680657
ENSG00000170264	FAM161A	0.361841773	0.27715672
ENSG00000156050	FAM161B	-0.038314917	1
ENSG00000114023	FAM162A	0.390584423	0.002944863
ENSG00000183807	FAM162B	0	1
ENSG00000143340	FAM163A	-0.206221155	1
ENSG00000196990	FAM163B	0	1
ENSG00000188163	FAM166A	-0.438845636	0.000412841
ENSG00000215187	FAM166B	0.666872706	0.759942834
ENSG00000154319	FAM167A	-0.214704041	0.682345879
ENSG00000183615	FAM167B	-1.461626154	0.170430629
ENSG00000054965	FAM168A	-0.289449876	0.024853274
ENSG00000152102	FAM168B	0.061728681	1
ENSG00000198780	FAM169A	-0.473074796	0.016943729
ENSG00000185087	FAM169B	0.685847312	1
ENSG00000164334	FAM170A	-1.789943949	1
ENSG00000172538	FAM170B	0	1
ENSG00000234736	FAM170B-AS1	-3.437805395	0.530426505
ENSG00000148468	FAM171A1	-0.019518414	1
ENSG00000161682	FAM171A2	-0.794619132	0.000451267
ENSG00000144369	FAM171B	-0.070869229	1
ENSG00000113391	FAM172A	0.081523497	1
ENSG00000175841	FAM172BP	1.434986326	0.37811862
ENSG00000103254	FAM173A	-0.378049285	0.164388685
ENSG00000150756	FAM173B	-0.039766316	1
ENSG00000174132	FAM174A	0.362291567	0.474288167
ENSG00000185442	FAM174B	-0.725863101	9.84E-09
ENSG00000163322	FAM175A	-0.246711046	0.321533738
ENSG00000165660	FAM175B	0.294385234	0.209508212
ENSG00000151327	FAM177A1	0.222979169	0.428667606
ENSG00000214886	FAM177A1P1	-3.066681331	0.839452475
ENSG00000197520	FAM177B	-0.370355466	1
ENSG00000119906	FAM178A	-0.033417957	1
ENSG00000168754	FAM178B	0.075738722	1
ENSG00000189350	FAM179A	-0.352402169	1
ENSG00000198718	FAM179B	1.08441658	4.78E-10
ENSG00000189320	FAM180A	-0.070283717	1
ENSG00000196666	FAM180B	1.097074566	1
ENSG00000140067	FAM181A	1.968064759	1
ENSG00000258584	FAM181A-AS1	1.968064759	1
ENSG00000182103	FAM181B	0.239684346	1
ENSG00000125804	FAM182A	1.14561315	0.003615877
ENSG00000175170	FAM182B	0.747426972	0.000878695
ENSG00000186973	FAM183A	-0.625944741	1
ENSG00000164556	FAM183B	1.968064759	1
ENSG00000111879	FAM184A	0.742301046	0.061426034
ENSG00000047662	FAM184B	0.185159577	1
ENSG00000222011	FAM185A	0.639863076	0.000171275
ENSG00000214439	FAM185BP	0.048540835	1
ENSG00000185958	FAM186A	0.040110698	1
ENSG00000135436	FAM186B	0.301410141	0.208439084
ENSG00000214447	FAM187A	-0.148425418	1
ENSG00000177558	FAM187B	1.968899115	1
ENSG00000148481	FAM188A	0.219722164	0.525132448
ENSG00000106125	FAM188B	0.492393442	0.047172211
ENSG00000214237	FAM188B2	0.217842033	1
ENSG00000104059	FAM189A1	-0.212566974	0.487504342
ENSG00000135063	FAM189A2	0.105031311	1
ENSG00000160767	FAM189B	0.076395093	1
ENSG00000172775	FAM192A	-0.116569661	0.941335265
ENSG00000125386	FAM193A	0.098081211	1
ENSG00000146067	FAM193B	-0.098867284	1
ENSG00000163645	FAM194A	-0.452925787	1
ENSG00000165837	FAM194B	0.045703336	1
ENSG00000172366	FAM195A	0.578470678	0.000225917
ENSG00000225663	FAM195B	-0.167028622	0.697249951
ENSG00000188916	FAM196A	-0.418238445	0.854768926
ENSG00000204767	FAM196B	-0.307182213	0.938712555
ENSG00000224336	FAM197Y1	0	1
ENSG00000234803	FAM197Y2	0	1
ENSG00000230066	FAM197Y3	0	1
ENSG00000237802	FAM197Y6	0	1
ENSG00000228383	FAM197Y7	1.968899115	1
ENSG00000225560	FAM197Y8	-1.789943949	1
ENSG00000234830	FAM197Y9	0	1
ENSG00000144649	FAM198A	-0.311093121	0.421876738
ENSG00000164125	FAM198B	-0.558507243	0.007547423
ENSG00000123575	FAM199X	-0.326901082	0.084576818
ENSG00000183662	FAM19A1	0.008016833	1
ENSG00000198673	FAM19A2	-0.212508663	0.29432186
ENSG00000184599	FAM19A3	0.107058388	1
ENSG00000163377	FAM19A4	0.276878413	1
ENSG00000219438	FAM19A5	0.518828548	3.71E-05
ENSG00000221909	FAM200A	0.489551655	0.06755203
ENSG00000237765	FAM200B	-0.759829199	1.52E-05
ENSG00000204860	FAM201A	-0.564749727	0.969894264
ENSG00000230992	FAM201B	-0.153175176	1
ENSG00000235173	FAM203A	0.011328458	1
ENSG00000230567	FAM203B	-0.195067049	0.442442307
ENSG00000165669	FAM204A	-0.160007209	0.991341305
ENSG00000233040	FAM204BP	-0.547540916	1
ENSG00000230902	FAM204CP	0	1
ENSG00000205108	FAM205A	-1.469004341	1
ENSG00000215204	FAM205B	1.968064759	1
ENSG00000187791	FAM205CP	0.17812081	1
ENSG00000119328	FAM206A	-0.022018816	1
ENSG00000251106	FAM206BP	-0.276055042	1
ENSG00000160256	FAM207A	0.569535422	0.000520622
ENSG00000228797	FAM207BP	0.569180485	0.123314911
ENSG00000232797	FAM207CP	0.747447885	0.223499948
ENSG00000163946	FAM208A	-0.060112258	1
ENSG00000108021	FAM208B	0.802735727	1.21E-15
ENSG00000124103	FAM209A	0.169791815	0.503913277
ENSG00000213714	FAM209B	-1.206449608	0.922847702
ENSG00000108950	FAM20A	0.470253886	1
ENSG00000116199	FAM20B	-0.233607211	0.138517872
ENSG00000177706	FAM20C	-0.651199142	0.010628479
ENSG00000177150	FAM210A	0.437451519	0.001023416
ENSG00000124098	FAM210B	-0.619941316	0.000751949
ENSG00000213770	FAM210CP	-0.66415054	0.883150025
ENSG00000181350	FAM211A	-0.424670633	0.000531586
ENSG00000178026	FAM211B	0.240166927	1
ENSG00000185614	FAM212A	0.919817792	0.138300641
ENSG00000197852	FAM212B	0.026485476	1
ENSG00000122378	FAM213A	0	1
ENSG00000157870	FAM213B	-0.512381365	0.00131588
ENSG00000047346	FAM214A	0.233455302	0.929866686
ENSG00000005238	FAM214B	0.299481821	0.089151126
ENSG00000267496	FAM215A	3.283241606	0.839452475
ENSG00000232300	FAM215B	0.372821904	1
ENSG00000204856	FAM216A	0.817726277	0.000237128
ENSG00000179813	FAM216B	1.968899115	1
ENSG00000145975	FAM217A	0.132124434	0.961657553
ENSG00000196227	FAM217B	-0.415677104	0.034024962
ENSG00000250486	FAM218A	0.644257269	0.839452475
ENSG00000221891	FAM218BP	0	1
ENSG00000164970	FAM219A	-0.398941943	0.00149037
ENSG00000178761	FAM219B	-0.4426122	0.019259152
ENSG00000099290	FAM21A	0.363563787	0.015163901
ENSG00000152726	FAM21B	0.229513352	0.328148358
ENSG00000172661	FAM21C	0.251110402	0.180402258
ENSG00000174196	FAM21D	0.182859218	0.977053453
ENSG00000239769	FAM21EP	-0.202815625	1
ENSG00000237840	FAM21FP	0.11612025	1
ENSG00000178397	FAM220A	-0.502588554	0.005895308
ENSG00000176007	FAM220BP	-2.562098175	0.023361931
ENSG00000213612	FAM220CP	-0.33722932	1
ENSG00000188732	FAM221A	0.932852689	0.010469556
ENSG00000204930	FAM221B	1.968064759	1
ENSG00000139438	FAM222A	1.156495687	6.78E-17
ENSG00000255650	FAM222A-AS1	1.088899333	1.29E-13
ENSG00000173065	FAM222B	0.081144408	1
ENSG00000233522	FAM224A	-0.715266511	1
ENSG00000230663	FAM224B	0.521665271	1
ENSG00000231528	FAM225A	-0.682106126	1.52E-05
ENSG00000225684	FAM225B	-0.461469083	0.012682504
ENSG00000184949	FAM227A	0.535115897	0.136598752
ENSG00000166262	FAM227B	-0.413671097	0.12164546
ENSG00000186453	FAM228A	-0.315467144	1
ENSG00000219626	FAM228B	-0.880653863	4.32E-11
ENSG00000225828	FAM229A	0.007139487	1
ENSG00000203778	FAM229B	-0.463708873	0.640918601
ENSG00000184923	FAM22A	-0.20349689	1
ENSG00000188199	FAM22B	0.127332761	1
ENSG00000214562	FAM22D	-0.701893237	0.532376554
ENSG00000228570	FAM22E	-0.365901213	1
ENSG00000130950	FAM22F	1.101250513	0.001330391
ENSG00000188152	FAM22G	0.97910108	0.001638096
ENSG00000232706	FAM22HP	1.034027942	0.688581822
ENSG00000188280	FAM230A	-1.086908212	0.803565461
ENSG00000215498	FAM230B	0.982220935	1
ENSG00000206142	FAM230C	-1.763603427	0.783919238
ENSG00000203795	FAM24A	-0.596403481	1
ENSG00000213185	FAM24B	0.069018298	1
ENSG00000188100	FAM25A	0.596680681	1
ENSG00000189090	FAM25B	0	1
ENSG00000188279	FAM25C	-1.632842449	0.000763397
ENSG00000214986	FAM25D	-1.790042574	1
ENSG00000231122	FAM25E	0	1
ENSG00000197910	FAM25G	2.77084622	1
ENSG00000239492	FAM25HP	0.17757022	1
ENSG00000164451	FAM26D	-0.524954093	1
ENSG00000178033	FAM26E	-1.406486488	0.000311342
ENSG00000188820	FAM26F	0	1
ENSG00000182368	FAM27A	1.561371369	1.58E-08
ENSG00000170215	FAM27B	1.769646204	3.02E-14
ENSG00000154537	FAM27C	1.523510576	3.38E-08
ENSG00000231997	FAM27D1	1.192355084	0.001839844
ENSG00000237198	FAM27E1	1.226469476	0.00021065
ENSG00000204807	FAM27E2	0.941855268	0.030296677
ENSG00000232833	FAM27E3	1.004092256	0.000122046
ENSG00000204805	FAM27E4P	1.644241563	1.31E-08
ENSG00000178130	FAM27L	-1.598960992	0.488772154
ENSG00000105058	FAM32A	0.274216852	0.079112074
ENSG00000203416	FAM32B	0.799536977	0.264691531
ENSG00000122376	FAM35A	0.234541104	0.377473609
ENSG00000165874	FAM35BP	0.058777981	1
ENSG00000259096	FAM35CP	0.435840212	0.529665212
ENSG00000189014	FAM35DP	-0.089882279	1
ENSG00000230210	FAM35EP	0.214046435	1
ENSG00000071889	FAM3A	-0.538649671	0.002475058
ENSG00000183844	FAM3B	1.097612721	1
ENSG00000196937	FAM3C	0.146659937	0.898780559
ENSG00000174028	FAM3C2	-0.023969919	1
ENSG00000198643	FAM3D	0.206377981	1
ENSG00000224989	FAM41AY1	0	1
ENSG00000226362	FAM41AY2	0	1
ENSG00000230368	FAM41C	-0.922582128	0.00509617
ENSG00000185112	FAM43A	-0.148505317	1
ENSG00000183114	FAM43B	-1.160361372	0.000479761
ENSG00000119979	FAM45A	-0.279503994	0.609215558
ENSG00000221930	FAM45B	-0.219014749	1
ENSG00000112773	FAM46A	-0.362051688	0.21700397
ENSG00000158246	FAM46B	-0.117938281	1
ENSG00000183508	FAM46C	-0.491224835	0.376731546
ENSG00000174016	FAM46D	-0.609724061	0.844870466
ENSG00000185448	FAM47A	0	1
ENSG00000189132	FAM47B	0	1
ENSG00000198173	FAM47C	0	1
ENSG00000174678	FAM47DP	-1.790042574	1
ENSG00000189157	FAM47E	-0.919121364	6.86E-08
ENSG00000197872	FAM49A	0.144079187	1
ENSG00000153310	FAM49B	0.126888294	0.749832116
ENSG00000071859	FAM50A	-0.157224267	0.525958732
ENSG00000145945	FAM50B	-0.665774595	1
ENSG00000174137	FAM53A	0.8626404	0.150125946
ENSG00000189319	FAM53B	0.519373821	0.000281072
ENSG00000120709	FAM53C	0.3422888	0.005114419
ENSG00000167695	FAM57A	0.187695013	0.50488081
ENSG00000149926	FAM57B	0.133185862	1
ENSG00000147382	FAM58A	0.088117884	1
ENSG00000233827	FAM58BP	-0.273883936	1
ENSG00000231514	FAM58CP	0.773995378	0.788373046
ENSG00000231184	FAM58DP	0.486809448	0.234945187
ENSG00000198797	FAM5B	1.278644271	0.121404166
ENSG00000162670	FAM5C	1.060437107	0.234095744
ENSG00000139146	FAM60A	1.090152809	1.54E-22
ENSG00000263829	FAM60BP	1.232839244	1.45E-07
ENSG00000267742	FAM60CP	0.947764039	1.24E-07
ENSG00000143409	FAM63A	-0.666873351	0.005437609
ENSG00000128923	FAM63B	-0.647493395	0.031621581
ENSG00000129195	FAM64A	-0.929197355	2.54E-11
ENSG00000039523	FAM65A	-0.223060567	0.105545408
ENSG00000111913	FAM65B	-0.244934117	0.088210028
ENSG00000042062	FAM65C	0.031291352	1
ENSG00000227888	FAM66A	-0.163100221	1
ENSG00000215374	FAM66B	-0.921747172	0.24410566
ENSG00000226711	FAM66C	-0.610410138	0.555611939
ENSG00000255052	FAM66D	-0.536808333	1
ENSG00000225725	FAM66E	0.381962478	1
ENSG00000154511	FAM69A	-0.568052293	0.002666402
ENSG00000165716	FAM69B	-0.11632957	1
ENSG00000187773	FAM69C	3.284072842	0.839452475
ENSG00000162771	FAM71A	0	1
ENSG00000170613	FAM71B	1.968408083	1
ENSG00000180219	FAM71C	1.968064759	1
ENSG00000172717	FAM71D	0.024548025	1
ENSG00000142530	FAM71E1	-0.173903858	1
ENSG00000180043	FAM71E2	-3.06568222	0.839452475
ENSG00000135248	FAM71F1	0.224138406	1
ENSG00000205085	FAM71F2	2.345757519	0.223506927
ENSG00000196550	FAM72A	0.196932825	0.634997735
ENSG00000188610	FAM72B	0.109081326	1
ENSG00000203817	FAM72C	0.19769465	1
ENSG00000215784	FAM72D	0.114722552	1
ENSG00000180488	FAM73A	-0.109342708	1
ENSG00000148343	FAM73B	0.462551825	0.001851437
ENSG00000225597	FAM74A1	0	1
ENSG00000231757	FAM74A2	0	1
ENSG00000204844	FAM74A3	0	1
ENSG00000229746	FAM74A4	-1.789943949	1
ENSG00000215112	FAM74A5	0	1
ENSG00000234407	FAM74A6	1.968899115	1
ENSG00000009780	FAM76A	-0.124594741	1
ENSG00000077458	FAM76B	0.005062557	1
ENSG00000126882	FAM78A	-0.252238687	1
ENSG00000188859	FAM78B	0.70013574	0.00015372
ENSG00000157470	FAM81A	0.554241922	2.22E-05
ENSG00000153347	FAM81B	0.077883053	1
ENSG00000147689	FAM83A	0.369320294	1
ENSG00000168143	FAM83B	1.286363728	0.249415248
ENSG00000125998	FAM83C	1.968064759	1
ENSG00000235214	FAM83C-AS1	0.981088918	1
ENSG00000101447	FAM83D	-0.329181728	0.011737038
ENSG00000105523	FAM83E	0.394053226	0.824149106
ENSG00000133477	FAM83F	-0.225187586	1
ENSG00000188522	FAM83G	0.538658335	7.13E-07
ENSG00000180921	FAM83H	-0.265273315	0.03709363
ENSG00000162981	FAM84A	-0.326043697	1
ENSG00000168672	FAM84B	-0.41562067	0.079807678
ENSG00000118894	FAM86A	0.281095956	0.184171566
ENSG00000186523	FAM86B1	0.306799132	0.492816003
ENSG00000145002	FAM86B2	0.447210763	0.441447208
ENSG00000173295	FAM86B3P	0.103102776	1
ENSG00000158483	FAM86C1	-0.032161451	1
ENSG00000160172	FAM86C2P	-0.407324467	0.360613759
ENSG00000244026	FAM86DP	-0.484334142	0.039195
ENSG00000251669	FAM86EP	0.019260835	1
ENSG00000164845	FAM86FP	0.443905572	0.445833485
ENSG00000166492	FAM86GP	-0.892641772	0.266689931
ENSG00000253540	FAM86HP	0.047682982	1
ENSG00000171084	FAM86JP	-0.361653453	0.220168733
ENSG00000163612	FAM86KP	0.34036976	0.576822557
ENSG00000242731	FAM86LP	0.100162211	1
ENSG00000186234	FAM86MP	0.278943024	1
ENSG00000182366	FAM87A	0.980902271	1
ENSG00000177757	FAM87B	0.217901195	1
ENSG00000182118	FAM89A	0.099190321	1
ENSG00000176973	FAM89B	0.383226044	0.016046062
ENSG00000137414	FAM8A1	0.543409008	0.033374677
ENSG00000254722	FAM8A2P	-1.763309948	0.783919238
ENSG00000224337	FAM8A3P	0.17812081	1
ENSG00000232730	FAM8A4P	0.218390621	1
ENSG00000223844	FAM8A5P	0	1
ENSG00000235391	FAM8A5P	0	1
ENSG00000238101	FAM8A5P	0	1
ENSG00000218772	FAM8A6P	0.980762732	1
ENSG00000171847	FAM90A1	-0.597051498	1
ENSG00000254597	FAM90A10P	1.968408083	1
ENSG00000233115	FAM90A11P	1.968064759	1
ENSG00000254229	FAM90A12P	1.493786969	1
ENSG00000223885	FAM90A13P	1.968064759	1
ENSG00000189393	FAM90A14P	2.771679111	1
ENSG00000230045	FAM90A15P	2.770503696	1
ENSG00000229477	FAM90A16P	0	1
ENSG00000223535	FAM90A17P	0	1
ENSG00000231656	FAM90A18P	0.17812081	1
ENSG00000237122	FAM90A19P	0	1
ENSG00000233295	FAM90A20P	0	1
ENSG00000234749	FAM90A21P	-0.524465245	1
ENSG00000215365	FAM90A22P	0	1
ENSG00000241737	FAM90A23P	0.178022184	1
ENSG00000215354	FAM90A24P	2.169904947	0.783919238
ENSG00000251402	FAM90A25P	1.968064759	1
ENSG00000229924	FAM90A26P	-0.665676564	1
ENSG00000189348	FAM90A27P	2.77133639	1
ENSG00000205879	FAM90A2P	1.494030267	1
ENSG00000233132	FAM90A3P	0.719065848	1
ENSG00000249005	FAM90A4P	0	1
ENSG00000215373	FAM90A5P	0	1
ENSG00000248944	FAM90A6P	1.968408083	1
ENSG00000236660	FAM90A7P	1.968408083	1
ENSG00000224710	FAM90A8P	0.178022184	1
ENSG00000235825	FAM90A9P	-1.789943949	1
ENSG00000176853	FAM91A1	0.240174148	0.090925993
ENSG00000226067	FAM91A2	-0.385851252	1
ENSG00000188343	FAM92A1	0.188536977	0.778949515
ENSG00000157021	FAM92A1P1	0.150013516	1
ENSG00000230219	FAM92A1P2	-0.294894418	1
ENSG00000153789	FAM92B	-0.29434583	1
ENSG00000223839	FAM95B1	-1.575521069	0.133398611
ENSG00000166797	FAM96A	0.160253925	0.64091369
ENSG00000234048	FAM96AP1	0	1
ENSG00000224566	FAM96AP2	0.575206893	0.222778672
ENSG00000166595	FAM96B	0.287960063	0.043123869
ENSG00000119812	FAM98A	0.560455813	2.33E-07
ENSG00000171262	FAM98B	-0.158306863	0.630942616
ENSG00000130244	FAM98C	0.223046324	0.819063518
ENSG00000205866	FAM99A	0	1
ENSG00000205865	FAM99B	0	1
ENSG00000183304	FAM9A	0	1
ENSG00000177138	FAM9B	0.55399198	1
ENSG00000187268	FAM9C	2.771679111	1
ENSG00000198690	FAN1	0.437406182	0.001475309
ENSG00000187741	FANCA	0.152302897	0.569477027
ENSG00000181544	FANCB	-0.264131202	0.90844304
ENSG00000158169	FANCC	-0.249267797	0.201706421
ENSG00000144554	FANCD2	-0.031466576	1
ENSG00000163705	FANCD2OS	-0.00337823	1
ENSG00000230342	FANCD2P2	-0.120647168	1
ENSG00000112039	FANCE	0.489719542	0.001689166
ENSG00000183161	FANCF	-0.020743024	1
ENSG00000221829	FANCG	-0.599355275	6.21E-07
ENSG00000140525	FANCI	-0.10254512	0.919570617
ENSG00000115392	FANCL	-0.206427197	0.403367746
ENSG00000187790	FANCM	0.214187879	0.673381029
ENSG00000203780	FANK1	0.124812965	1
ENSG00000233409	FANK1-AS1	0	1
ENSG00000078098	FAP	-1.622103909	4.69E-08
ENSG00000197601	FAR1	0.189117356	0.385833458
ENSG00000254791	FAR1-IT1	0	1
ENSG00000235879	FAR1P1	-0.15423058	1
ENSG00000064763	FAR2	-0.005780344	1
ENSG00000152767	FARP1	-0.222114111	0.662779236
ENSG00000231194	FARP1-AS1	0.542657171	1
ENSG00000269599	FARP1-IT1	-1.789943949	1
ENSG00000006607	FARP2	0.460601643	0.00037746
ENSG00000145982	FARS2	0.169804399	0.795613168
ENSG00000179115	FARSA	0.458944641	9.08E-05
ENSG00000116120	FARSB	-0.078280114	1
ENSG00000026103	FAS	-0.524992697	0.001342384
ENSG00000117560	FASLG	1.968064759	1
ENSG00000169710	FASN	0.350393604	0.001027084
ENSG00000164896	FASTK	-0.298933551	0.31450502
ENSG00000138399	FASTKD1	0.289111526	0.14577039
ENSG00000118246	FASTKD2	0.252973507	0.166635512
ENSG00000124279	FASTKD3	0.548381067	0.000405803
ENSG00000215251	FASTKD5	0.665133924	9.84E-07
ENSG00000083857	FAT1	0.217410341	0.120802119
ENSG00000217809	FAT1P1	3.283241606	0.839452475
ENSG00000086570	FAT2	-0.44836397	0.87676969
ENSG00000165323	FAT3	0.083090914	1
ENSG00000196159	FAT4	-1.267054138	4.83E-08
ENSG00000147378	FATE1	0	1
ENSG00000149806	FAU	0.175161932	0.30709905
ENSG00000235297	FAUP1	0.205480633	0.203732682
ENSG00000146267	FAXC	-0.431038353	0.607341379
ENSG00000188878	FBF1	-0.12054615	1
ENSG00000105202	FBL	0.454373734	2.28E-05
ENSG00000162458	FBLIM1	-0.187397646	1
ENSG00000188573	FBLL1	0.347743603	1
ENSG00000077942	FBLN1	-0.596985911	9.06E-07
ENSG00000163520	FBLN2	0.325516927	1
ENSG00000140092	FBLN5	-0.53356231	0.302791385
ENSG00000144152	FBLN7	0.531992334	1
ENSG00000166147	FBN1	-1.420354589	2.65E-14
ENSG00000138829	FBN2	-0.225201707	0.12591893
ENSG00000142449	FBN3	0.692009255	0.603594755
ENSG00000165140	FBP1	0.980749984	1
ENSG00000130957	FBP2	-0.802148743	0.005875487
ENSG00000156860	FBRS	0.172493139	0.374664575
ENSG00000112787	FBRSL1	0.609150785	6.26E-08
ENSG00000127452	FBXL12	0.06067221	1
ENSG00000161040	FBXL13	0.064801935	1
ENSG00000171823	FBXL14	-0.066285844	1
ENSG00000107872	FBXL15	0.370927922	0.206161954
ENSG00000127585	FBXL16	-0.425063197	0.030796363
ENSG00000145743	FBXL17	-0.219457768	0.670047747
ENSG00000155034	FBXL18	-0.065795898	1
ENSG00000099364	FBXL19	0.211690442	0.189100047
ENSG00000260852	FBXL19-AS1	0.429853918	0.030806223
ENSG00000153558	FBXL2	0.264050819	0.063080755
ENSG00000108306	FBXL20	0.286589142	0.309162563
ENSG00000164616	FBXL21	-1.790042574	1
ENSG00000197361	FBXL22	0.168384099	1
ENSG00000005812	FBXL3	-0.377647201	0.094463775
ENSG00000112234	FBXL4	-0.030305395	1
ENSG00000118564	FBXL5	-0.5779003	0.000183489
ENSG00000182325	FBXL6	0.277227973	0.039385621
ENSG00000183580	FBXL7	-1.46963223	2.04E-12
ENSG00000135722	FBXL8	-0.492355333	0.009396175
ENSG00000147912	FBXO10	0.272604096	0.042805588
ENSG00000138081	FBXO11	-0.274574694	0.025520792
ENSG00000141665	FBXO15	0.727248913	1
ENSG00000214050	FBXO16	-0.659374417	0.000162474
ENSG00000269190	FBXO17	-0.125274991	0.924677729
ENSG00000134452	FBXO18	0.087395471	1
ENSG00000116661	FBXO2	-1.403433168	8.06E-10
ENSG00000135108	FBXO21	0.158415709	0.597492478
ENSG00000167196	FBXO22	-0.023024223	1
ENSG00000106336	FBXO24	-0.836949071	0.015691901
ENSG00000147364	FBXO25	0.349899628	0.158393293
ENSG00000161243	FBXO27	-0.997435675	0.778949515
ENSG00000143756	FBXO28	0.085692264	1
ENSG00000110429	FBXO3	0.135574957	0.917807673
ENSG00000118496	FBXO30	0.056162535	1
ENSG00000103264	FBXO31	0.801861172	3.59E-13
ENSG00000156804	FBXO32	1.02430363	4.81E-08
ENSG00000165355	FBXO33	-0.161502884	0.972435599
ENSG00000178974	FBXO34	-0.163005105	0.554673634
ENSG00000153832	FBXO36	0.201343505	1
ENSG00000231534	FBXO36-IT1	0.178464133	1
ENSG00000145868	FBXO38	0.290613705	0.210723532
ENSG00000177294	FBXO39	-0.914703433	0.778949515
ENSG00000151876	FBXO4	-0.054239177	1
ENSG00000163833	FBXO40	-0.571713682	1
ENSG00000163013	FBXO41	0.743597044	2.20E-12
ENSG00000037637	FBXO42	-0.099799348	1
ENSG00000156509	FBXO43	-1.648576494	0.305843913
ENSG00000132879	FBXO44	-0.092079136	1
ENSG00000174013	FBXO45	0.477016302	0.000108859
ENSG00000177051	FBXO46	0.196363526	0.662779236
ENSG00000204952	FBXO47	1.354061579	0.803565461
ENSG00000204923	FBXO48	-0.940181619	0.022171897
ENSG00000112029	FBXO5	-0.141963743	0.839452475
ENSG00000116663	FBXO6	0.543649102	0.599007419
ENSG00000100225	FBXO7	-0.130806244	0.742960177
ENSG00000164117	FBXO8	0.143813095	1
ENSG00000112146	FBXO9	0.039444413	1
ENSG00000171931	FBXW10	0.020753076	1
ENSG00000072803	FBXW11	0.197018468	0.344154573
ENSG00000230870	FBXW11P1	-0.042806619	1
ENSG00000164049	FBXW12	0.239826476	1
ENSG00000119402	FBXW2	0.01659728	1
ENSG00000107829	FBXW4	-0.940096753	0.03038974
ENSG00000230701	FBXW4P1	-1.765785226	0.783919238
ENSG00000159069	FBXW5	-0.020108592	1
ENSG00000109670	FBXW7	0.429459198	0.011142729
ENSG00000174989	FBXW8	0.151191644	0.839452475
ENSG00000132004	FBXW9	1.063768774	3.38E-09
ENSG00000162897	FCAMR	-1.789943949	1
ENSG00000186431	FCAR	0.238078954	1
ENSG00000179639	FCER1A	1.968064759	1
ENSG00000158869	FCER1G	-0.902912731	1
ENSG00000104921	FCER2	-1.944198026	0.035658239
ENSG00000119616	FCF1	0.387160211	0.003549146
ENSG00000227436	FCF1P1	0.061307983	1
ENSG00000218490	FCF1P10	-1.790042574	1
ENSG00000228638	FCF1P2	-0.362635657	0.935558251
ENSG00000239997	FCF1P3	-0.093451932	1
ENSG00000226112	FCF1P4	-0.40877507	1
ENSG00000220392	FCF1P5	0	1
ENSG00000225671	FCF1P6	-0.104547834	1
ENSG00000224727	FCF1P7	0.886281474	0.017367074
ENSG00000251111	FCF1P8	-0.031969721	1
ENSG00000231478	FCF1P9	0	1
ENSG00000090920	FCGBP	0.337154925	1
ENSG00000150337	FCGR1A	1.968899115	1
ENSG00000198019	FCGR1B	0.177913544	1
ENSG00000253193	FCGR1C	0.232969401	1
ENSG00000143226	FCGR2A	-2.134770564	0.0889662
ENSG00000072694	FCGR2B	1.724504304	6.92E-17
ENSG00000244682	FCGR2C	-1.186127844	0.663237425
ENSG00000203747	FCGR3A	1.769557051	1.04E-17
ENSG00000162747	FCGR3B	0	1
ENSG00000104870	FCGRT	0.790173244	0.954120814
ENSG00000130475	FCHO1	-0.318593829	0.599750316
ENSG00000157107	FCHO2	0.015428719	1
ENSG00000197948	FCHSD1	-0.113587013	1
ENSG00000137478	FCHSD2	-0.406918205	0.005918993
ENSG00000085265	FCN1	0	1
ENSG00000160339	FCN2	0	1
ENSG00000142748	FCN3	-3.066230809	0.839452475
ENSG00000163534	FCRL1	0.178365508	1
ENSG00000132704	FCRL2	0.17812081	1
ENSG00000160856	FCRL3	1.494410012	1
ENSG00000163518	FCRL4	0.17885654	1
ENSG00000143297	FCRL5	0.980841852	1
ENSG00000181036	FCRL6	0.178365508	1
ENSG00000132185	FCRLA	-0.6238759	1
ENSG00000162746	FCRLB	0.749282603	0.372184288
ENSG00000181617	FDCSP	0.177913544	1
ENSG00000079459	FDFT1	-0.650561267	3.61E-10
ENSG00000160752	FDPS	-0.343116551	0.005694879
ENSG00000225462	FDPSP1	-0.544360895	0.166059779
ENSG00000233980	FDPSP2	0.390817247	0.968692217
ENSG00000254793	FDPSP4	-0.464222991	0.488772154
ENSG00000215035	FDPSP5	-0.239901956	0.860461953
ENSG00000233676	FDPSP6	-0.736842211	0.757608831
ENSG00000231087	FDPSP7	0.210396735	1
ENSG00000224763	FDPSP8	-0.721259258	0.052293556
ENSG00000137714	FDX1	-0.11617771	1
ENSG00000267673	FDX1L	0.309752608	0.320239198
ENSG00000181741	FDX1P1	0.307012636	1
ENSG00000227054	FDX1P2	0.178404576	1
ENSG00000255561	FDXACB1	-0.121744718	1
ENSG00000161513	FDXR	-0.250367452	0.141873224
ENSG00000066926	FECH	-0.663680731	0.000878715
ENSG00000235534	FECHP1	-3.066779603	0.839452475
ENSG00000141965	FEM1A	0.549918726	5.27E-05
ENSG00000229231	FEM1AP1	0.078169954	1
ENSG00000265296	FEM1AP2	0.389947573	0.641915792
ENSG00000217770	FEM1AP3	1.097063152	1
ENSG00000235876	FEM1AP4	0.700574283	0.532376554
ENSG00000169018	FEM1B	0.080400306	1
ENSG00000145780	FEM1C	0.410650737	0.002850594
ENSG00000168496	FEN1	-0.152075457	0.480713177
ENSG00000215873	FEN1P1	-0.350012162	0.177148976
ENSG00000268388	FENDRR	-0.596217142	1
ENSG00000151422	FER	0.019610084	1
ENSG00000088340	FER1L4	-0.238788993	0.719228131
ENSG00000249715	FER1L5	-0.308832405	1
ENSG00000214814	FER1L6	-0.223708134	1
ENSG00000181171	FER1L6-AS1	0.769823572	1
ENSG00000253868	FER1L6-AS2	0.157944348	1
ENSG00000146618	FERD3L	0	1
ENSG00000101311	FERMT1	0.288015676	0.19999861
ENSG00000073712	FERMT2	-0.033152921	1
ENSG00000149781	FERMT3	0.199133177	1
ENSG00000232149	FERP1	0.764387587	0.153275568
ENSG00000182511	FES	-0.074695997	1
ENSG00000090512	FETUB	-1.790042574	1
ENSG00000163497	FEV	0.238628145	1
ENSG00000149557	FEZ1	0.661276438	0.01381773
ENSG00000171055	FEZ2	-0.154418384	0.636838773
ENSG00000128610	FEZF1	-1.914656869	0.039702323
ENSG00000230316	FEZF1-AS1	-2.050186917	0.061426034
ENSG00000153266	FEZF2	3.282899877	0.839452475
ENSG00000126266	FFAR1	0	1
ENSG00000126262	FFAR2	3.284072842	0.839452475
ENSG00000185897	FFAR3	0	1
ENSG00000186188	FFAR4	1.871697062	1
ENSG00000171560	FGA	0	1
ENSG00000171564	FGB	0	1
ENSG00000102302	FGD1	-0.163059197	0.645526716
ENSG00000146192	FGD2	0.17757022	1
ENSG00000127084	FGD3	0.948614239	0.08229095
ENSG00000139132	FGD4	0.151624622	1
ENSG00000154783	FGD5	-0.421127746	0.477853536
ENSG00000225733	FGD5-AS1	-0.74327062	2.57E-11
ENSG00000250439	FGD5P1	1.360137957	0.117023476
ENSG00000180263	FGD6	-0.037371272	1
ENSG00000113578	FGF1	-1.376222003	1.96E-11
ENSG00000070193	FGF10	-0.070704964	1
ENSG00000161958	FGF11	-0.557049028	0.00256
ENSG00000114279	FGF12	-0.336843632	0.320796081
ENSG00000231383	FGF12-AS1	0.980694287	1
ENSG00000230126	FGF12-AS2	0.542799384	1
ENSG00000226709	FGF12-AS3	0.587623979	0.783919238
ENSG00000129682	FGF13	-0.494835162	0.215384651
ENSG00000226031	FGF13-AS1	-0.666215353	1
ENSG00000102466	FGF14	0.167085742	1
ENSG00000234445	FGF14-AS1	0	1
ENSG00000243319	FGF14-IT1	0.595104633	0.951966136
ENSG00000196468	FGF16	0	1
ENSG00000158815	FGF17	-0.325443474	1
ENSG00000156427	FGF18	0.379434998	1
ENSG00000162344	FGF19	-1.789943949	1
ENSG00000138685	FGF2	-0.191058076	0.607930779
ENSG00000078579	FGF20	0	1
ENSG00000105550	FGF21	2.416028896	0.530426505
ENSG00000070388	FGF22	0.127618704	1
ENSG00000118972	FGF23	0	1
ENSG00000186895	FGF3	0.206171017	1
ENSG00000075388	FGF4	0	1
ENSG00000138675	FGF5	0.132116054	1
ENSG00000111241	FGF6	1.096233093	1
ENSG00000140285	FGF7	-0.003901326	1
ENSG00000264061	FGF7P1	0	1
ENSG00000185390	FGF7P2	-1.789943949	1
ENSG00000107831	FGF8	0.575974154	1
ENSG00000102678	FGF9	2.038549984	0.333043958
ENSG00000137440	FGFBP1	-1.760865335	0.488772154
ENSG00000137441	FGFBP2	0	1
ENSG00000174721	FGFBP3	0.374646409	0.585181058
ENSG00000077782	FGFR1	0.006970254	1
ENSG00000213066	FGFR1OP	-0.011614297	1
ENSG00000111790	FGFR1OP2	-0.153718673	0.819442716
ENSG00000230256	FGFR1OP2P1	0	1
ENSG00000066468	FGFR2	-0.448902093	0.328880123
ENSG00000068078	FGFR3	0.369165807	0.403554772
ENSG00000223971	FGFR3P1	0	1
ENSG00000224131	FGFR3P1	0	1
ENSG00000230994	FGFR3P1	0	1
ENSG00000232244	FGFR3P1	0	1
ENSG00000232276	FGFR3P1	0	1
ENSG00000260984	FGFR3P5	-3.066329051	0.839452475
ENSG00000226164	FGFR3P6	1.968064759	1
ENSG00000160867	FGFR4	0.435217059	0.000138657
ENSG00000127418	FGFRL1	0.777477494	3.92E-13
ENSG00000171557	FGG	0	1
ENSG00000172456	FGGY	-0.534238175	0.069694401
ENSG00000104760	FGL1	-0.597051498	1
ENSG00000127951	FGL2	1.968064759	1
ENSG00000000938	FGR	0.719544624	1
ENSG00000091483	FH	0.054537847	1
ENSG00000142621	FHAD1	0.057113334	1
ENSG00000137460	FHDC1	0.104383687	1
ENSG00000189283	FHIT	0.098808491	1
ENSG00000022267	FHL1	-0.206643332	0.250156638
ENSG00000115641	FHL2	-0.052496594	1
ENSG00000183386	FHL3	0.139781213	0.835620434
ENSG00000112214	FHL5	2.771188826	1
ENSG00000135723	FHOD1	0.129486785	0.696599149
ENSG00000134775	FHOD3	0.163145712	1
ENSG00000234213	FHP1	0.177367671	0.840466475
ENSG00000130720	FIBCD1	-0.535884051	0.018327516
ENSG00000176971	FIBIN	-0.153566494	1
ENSG00000172500	FIBP	-0.162330941	0.545601171
ENSG00000198855	FICD	0.152402262	0.788257293
ENSG00000112367	FIG4	-0.40006984	0.307100643
ENSG00000165197	FIGF	-0.483254531	1
ENSG00000183733	FIGLA	2.772169562	1
ENSG00000182263	FIGN	-0.924157817	2.70E-13
ENSG00000132436	FIGNL1	-0.314041802	0.262460627
ENSG00000118407	FILIP1	-0.535013162	0.236965916
ENSG00000168386	FILIP1L	0.466282054	0.678798308
ENSG00000145216	FIP1L1	0.300519979	0.011683256
ENSG00000214253	FIS1	0.063226256	1
ENSG00000139914	FITM1	0.178464133	1
ENSG00000197296	FITM2	0.014388188	1
ENSG00000179943	FIZ1	-0.634092296	0.000619402
ENSG00000179431	FJX1	-0.301763095	0.058165673
ENSG00000141756	FKBP10	-0.434885546	8.21E-05
ENSG00000134285	FKBP11	0.317082807	0.262811424
ENSG00000106080	FKBP14	0.353451394	0.06755203
ENSG00000119321	FKBP15	-0.066085439	1
ENSG00000088832	FKBP1A	0.070781961	1
ENSG00000259691	FKBP1AP2	0.057265958	1
ENSG00000230243	FKBP1AP3	0.144201798	1
ENSG00000119782	FKBP1B	-1.179219157	0.004728157
ENSG00000198225	FKBP1C	0.167178195	0.532376554
ENSG00000173486	FKBP2	-0.468112047	0.002263827
ENSG00000100442	FKBP3	-0.439606297	0.004825214
ENSG00000004478	FKBP4	0.773451805	7.35E-16
ENSG00000251463	FKBP4P1	0.831577846	1.13E-09
ENSG00000096060	FKBP5	0.665579174	1.87E-07
ENSG00000077800	FKBP6	-0.186823575	1
ENSG00000079150	FKBP7	0.105381509	1
ENSG00000105701	FKBP8	-0.261399257	0.050382423
ENSG00000122642	FKBP9	-0.489429503	0.000231594
ENSG00000176826	FKBP9L	-0.57679705	0.000971564
ENSG00000204315	FKBPL	0.405211556	0.110593776
ENSG00000223666	FKBPL	0	1
ENSG00000224200	FKBPL	0	1
ENSG00000230907	FKBPL	0	1
ENSG00000181027	FKRP	0.443582759	0.000160822
ENSG00000106692	FKTN	-0.03534732	1
ENSG00000160688	FLAD1	0.228374074	0.210399004
ENSG00000154803	FLCN	-0.114639135	0.97885578
ENSG00000143631	FLG	-0.311217768	0.126608805
ENSG00000237975	FLG-AS1	-0.207596906	0.39530133
ENSG00000143520	FLG2	-0.314718188	1
ENSG00000151702	FLI1	0.727335899	1
ENSG00000254703	FLI1-AS1	0	1
ENSG00000177731	FLII	-0.611947226	1.19E-09
ENSG00000196924	FLNA	-0.760065184	7.36E-16
ENSG00000136068	FLNB	-0.103084226	0.841470782
ENSG00000244161	FLNB-AS1	-0.079307294	1
ENSG00000128591	FLNC	-0.102080535	0.839452475
ENSG00000137312	FLOT1	-0.441805645	9.43E-05
ENSG00000206379	FLOT1	0	1
ENSG00000206480	FLOT1	0	1
ENSG00000223654	FLOT1	0	1
ENSG00000224740	FLOT1	0	1
ENSG00000230143	FLOT1	0	1
ENSG00000232280	FLOT1	0	1
ENSG00000236271	FLOT1	0	1
ENSG00000132589	FLOT2	-0.779052574	2.20E-10
ENSG00000126500	FLRT1	-0.10172187	1
ENSG00000185070	FLRT2	0.058742588	1
ENSG00000125848	FLRT3	-0.447940109	1
ENSG00000102755	FLT1	-0.072421428	1
ENSG00000229515	FLT1P1	0	1
ENSG00000122025	FLT3	0.31613773	1
ENSG00000090554	FLT3LG	-0.583872244	0.445814443
ENSG00000037280	FLT4	-0.84126444	5.80E-10
ENSG00000162769	FLVCR1	0.770689756	1.62E-06
ENSG00000198468	FLVCR1-AS1	-0.882353956	0.46189204
ENSG00000119686	FLVCR2	-0.698064724	4.76E-10
ENSG00000059122	FLYWCH1	-0.323150648	0.063096347
ENSG00000239516	FLYWCH1P1	-1.270323717	0.775383817
ENSG00000162076	FLYWCH2	-0.41173991	0.389784502
ENSG00000248905	FMN1	-0.362479977	0.112255065
ENSG00000155816	FMN2	-0.016298366	1
ENSG00000184922	FMNL1	-0.96634336	3.76E-16
ENSG00000157827	FMNL2	0.249656948	0.158150761
ENSG00000161791	FMNL3	0.012967944	1
ENSG00000010932	FMO1	-0.271198847	0.413214083
ENSG00000234984	FMO10P	-3.06568222	0.839452475
ENSG00000232148	FMO11P	0.980841852	1
ENSG00000094963	FMO2	0.522357082	1
ENSG00000007933	FMO3	0.17757022	1
ENSG00000076258	FMO4	0.437264245	0.01734214
ENSG00000131781	FMO5	0.012562708	1
ENSG00000117507	FMO6P	1.494128893	1
ENSG00000230231	FMO7P	-0.449514227	1
ENSG00000238087	FMO8P	0	1
ENSG00000215834	FMO9P	1.871549538	1
ENSG00000122176	FMOD	0	1
ENSG00000102081	FMR1	0.154426873	0.840466475
ENSG00000268066	FMR1-AS1	0.178022184	1
ENSG00000236337	FMR1-IT1	0	1
ENSG00000176988	FMR1NB	-0.510386264	1
ENSG00000115414	FN1	-1.271894025	1.07E-34
ENSG00000167363	FN3K	0.143590209	1
ENSG00000141560	FN3KRP	-0.489466705	0.003055787
ENSG00000187239	FNBP1	-0.200024515	0.529445468
ENSG00000137942	FNBP1L	-0.40069787	0.006881006
ENSG00000257800	FNBP1P1	-0.2395367	1
ENSG00000109920	FNBP4	0.41288838	0.000773998
ENSG00000164694	FNDC1	0.231368507	1
ENSG00000235086	FNDC1-IT1	1.968064759	1
ENSG00000102531	FNDC3A	-0.035865329	1
ENSG00000075420	FNDC3B	-0.301412575	0.017189501
ENSG00000223592	FNDC3CP	0	1
ENSG00000115226	FNDC4	-0.566326548	1
ENSG00000160097	FNDC5	-0.160884702	1
ENSG00000143107	FNDC7	0.237768252	1
ENSG00000073598	FNDC8	0.728196471	0.002922077
ENSG00000172568	FNDC9	0.727823419	0.883150025
ENSG00000217128	FNIP1	-0.140279769	0.597492478
ENSG00000052795	FNIP2	-0.133012956	0.994794375
ENSG00000168522	FNTA	-0.052896659	1
ENSG00000230022	FNTAP2	0.305639081	1
ENSG00000257365	FNTB	0.162870209	0.518375884
ENSG00000188352	FOCAD	-0.052346786	1
ENSG00000086205	FOLH1	-0.258997326	1
ENSG00000134612	FOLH1B	-0.018635724	1
ENSG00000110195	FOLR1	-1.905823923	0.333043958
ENSG00000165457	FOLR2	1.968064759	1
ENSG00000110203	FOLR3	1.142433526	1
ENSG00000183560	FOLR4	0	1
ENSG00000133393	FOPNL	-0.012617033	1
ENSG00000170345	FOS	2.558254684	6.54E-39
ENSG00000125740	FOSB	3.676414315	4.02E-16
ENSG00000175592	FOSL1	0.618117747	1.23E-08
ENSG00000248394	FOSL1P1	0.681933447	0.000677332
ENSG00000075426	FOSL2	-0.781358689	2.30E-15
ENSG00000129514	FOXA1	-0.262892305	1
ENSG00000125798	FOXA2	-0.494945982	0.051959824
ENSG00000170608	FOXA3	-3.066779603	0.839452475
ENSG00000171956	FOXB1	0.020998606	1
ENSG00000204612	FOXB2	0.178404576	1
ENSG00000054598	FOXC1	1.166130793	5.88E-09
ENSG00000176692	FOXC2	0.522942803	1
ENSG00000251493	FOXD1	-0.318617088	0.083403873
ENSG00000186564	FOXD2	-0.309998933	0.291290314
ENSG00000237424	FOXD2-AS1	-0.243770166	0.302633093
ENSG00000187140	FOXD3	-1.393145089	0.597492478
ENSG00000170122	FOXD4	0.884055379	0.619134739
ENSG00000184492	FOXD4L1	0.74389556	0.688581822
ENSG00000204828	FOXD4L2	0.34955693	1
ENSG00000187559	FOXD4L3	0.641004583	1
ENSG00000184659	FOXD4L4	0.441101223	1
ENSG00000204779	FOXD4L5	0.229858829	1
ENSG00000204793	FOXD4L6	0.729922752	1
ENSG00000178919	FOXE1	-2.565017808	1
ENSG00000186790	FOXE3	-2.565017808	1
ENSG00000103241	FOXF1	-0.629396934	0.044108279
ENSG00000137273	FOXF2	1.013581663	6.06E-10
ENSG00000176165	FOXG1	-0.434879958	0.668237693
ENSG00000160973	FOXH1	-0.887736261	9.32E-07
ENSG00000168269	FOXI1	0	1
ENSG00000186766	FOXI2	3.283730918	0.839452475
ENSG00000214336	FOXI3	1.968064759	1
ENSG00000129654	FOXJ1	2.627822259	0.349636506
ENSG00000065970	FOXJ2	-0.115231964	0.888749954
ENSG00000198815	FOXJ3	0.439101362	0.000106642
ENSG00000164916	FOXK1	0.163531211	0.379964854
ENSG00000141568	FOXK2	0.370890636	0.000690208
ENSG00000176678	FOXL1	-0.074807523	1
ENSG00000183770	FOXL2	2.77133639	1
ENSG00000111206	FOXM1	-0.493048099	1.81E-06
ENSG00000109101	FOXN1	0	1
ENSG00000170802	FOXN2	0.177927121	0.562125057
ENSG00000053254	FOXN3	-0.485107731	0.001687948
ENSG00000258920	FOXN3-AS1	-0.35517624	1
ENSG00000259073	FOXN3-AS2	0	1
ENSG00000176318	FOXN3P1	0.84195535	0.349636506
ENSG00000139445	FOXN4	1.395183827	1
ENSG00000150907	FOXO1	1.047123132	4.88E-11
ENSG00000214295	FOXO1B	0.516546038	1
ENSG00000118689	FOXO3	0.467161576	0.000318282
ENSG00000240445	FOXO3B	0.803897197	1.81E-06
ENSG00000184481	FOXO4	0.285602149	0.440348863
ENSG00000204060	FOXO6	-0.688093673	0.026656363
ENSG00000114861	FOXP1	-0.244586298	0.358835329
ENSG00000244203	FOXP1-AS1	-1.468554591	1
ENSG00000242094	FOXP1-IT1	0.981293816	1
ENSG00000128573	FOXP2	-0.267585099	1
ENSG00000049768	FOXP3	0.377568695	0.803565461
ENSG00000137166	FOXP4	-0.032419005	1
ENSG00000164379	FOXQ1	0	1
ENSG00000176302	FOXR1	-0.595667537	1
ENSG00000189299	FOXR2	0	1
ENSG00000110074	FOXRED1	0.107369634	1
ENSG00000100350	FOXRED2	0.212707069	0.151905034
ENSG00000179772	FOXS1	-3.066230809	0.839452475
ENSG00000136877	FPGS	0.082703749	1
ENSG00000254685	FPGT	-0.73273017	0.011010116
ENSG00000259030	FPGT-TNNI3K	-0.556226476	0.054208826
ENSG00000171051	FPR1	0.580464054	1
ENSG00000171049	FPR2	1.493639466	1
ENSG00000187474	FPR3	-0.596158569	1
ENSG00000148690	FRA10AC1	-0.255595253	0.651031334
ENSG00000138759	FRAS1	0.446871944	5.38E-05
ENSG00000165879	FRAT1	-0.799509147	0.659332583
ENSG00000181274	FRAT2	0.836952877	1.12E-05
ENSG00000164946	FREM1	0.339763677	1
ENSG00000150893	FREM2	-0.513074715	0.559712102
ENSG00000225350	FREM2-AS1	0	1
ENSG00000183090	FREM3	1.199838334	0.012703289
ENSG00000109536	FRG1	0.229328139	0.293274415
ENSG00000149531	FRG1B	-0.135270557	0.966720561
ENSG00000205097	FRG2	1.968408083	1
ENSG00000225899	FRG2B	3.660762331	0.530426505
ENSG00000172969	FRG2C	1.535920413	0.803565461
ENSG00000111816	FRK	-0.057499546	1
ENSG00000153303	FRMD1	1.164519605	0.803565461
ENSG00000172159	FRMD3	0.243036943	1
ENSG00000151474	FRMD4A	0.595757074	1.98E-06
ENSG00000114541	FRMD4B	-0.14214497	1
ENSG00000171877	FRMD5	-0.405485228	0.000481576
ENSG00000139926	FRMD6	-0.494783495	4.99E-06
ENSG00000258537	FRMD6-AS2	-0.452506674	0.00114601
ENSG00000165694	FRMD7	0.416368705	1
ENSG00000126391	FRMD8	0.401384689	0.002574535
ENSG00000227942	FRMD8P1	0.11314067	1
ENSG00000070601	FRMPD1	-0.136716095	1
ENSG00000170324	FRMPD2	-0.524710246	1
ENSG00000197704	FRMPD2P1	0	1
ENSG00000150175	FRMPD2P2	1.968408083	1
ENSG00000147234	FRMPD3	-0.435262923	0.452245783
ENSG00000227610	FRMPD3-AS1	-0.257501385	1
ENSG00000169933	FRMPD4	0.070719812	1
ENSG00000223487	FRMPD4-AS1	0	1
ENSG00000156869	FRRS1	-0.413189766	0.124174087
ENSG00000136805	FRRS1L	0.230234351	1
ENSG00000166225	FRS2	0.289870831	0.178253883
ENSG00000137218	FRS3	0.073145233	1
ENSG00000073910	FRY	0.092232151	1
ENSG00000237637	FRY-AS1	-2.564566651	1
ENSG00000075539	FRYL	-0.267964923	0.102273482
ENSG00000162998	FRZB	0.980841852	1
ENSG00000265817	FSBP	-0.912720969	4.48E-05
ENSG00000189139	FSCB	0	1
ENSG00000075618	FSCN1	0.379993618	0.00080477
ENSG00000186765	FSCN2	0.970500927	0.062166282
ENSG00000106328	FSCN3	-0.568681529	0.016277305
ENSG00000105255	FSD1	0.108751668	0.951966136
ENSG00000106701	FSD1L	0.340581741	0.217052102
ENSG00000186628	FSD2	-0.25423059	1
ENSG00000131808	FSHB	0	1
ENSG00000170820	FSHR	-0.72879865	0.87943317
ENSG00000150667	FSIP1	0.185289724	1
ENSG00000188738	FSIP2	-1.691007226	0.002377706
ENSG00000134363	FST	-1.062111461	2.70E-08
ENSG00000163430	FSTL1	-1.861640555	2.04E-71
ENSG00000070404	FSTL3	-0.300845182	0.020685144
ENSG00000053108	FSTL4	0.132081591	1
ENSG00000168843	FSTL5	0.144087423	1
ENSG00000160282	FTCD	-0.567464833	0.719935852
ENSG00000237338	FTCD-AS1	0	1
ENSG00000167996	FTH1	-0.974443395	4.60E-21
ENSG00000232273	FTH1P1	-0.779173496	0.01356837
ENSG00000223361	FTH1P10	-0.917493491	2.85E-10
ENSG00000237264	FTH1P11	-0.994705781	3.45E-10
ENSG00000213362	FTH1P12	-0.726857901	0.003455287
ENSG00000185638	FTH1P14	0	1
ENSG00000218980	FTH1P15	-0.880642448	4.78E-05
ENSG00000227376	FTH1P16	-1.021362492	3.93E-10
ENSG00000243048	FTH1P18	0	1
ENSG00000219186	FTH1P19	0	1
ENSG00000234975	FTH1P2	-1.090906383	1.88E-18
ENSG00000226564	FTH1P20	-0.871051509	4.03E-09
ENSG00000249013	FTH1P21	-0.809590835	0.074544612
ENSG00000225079	FTH1P22	0	1
ENSG00000242960	FTH1P23	-1.125916524	2.18E-18
ENSG00000249302	FTH1P24	1.968899115	1
ENSG00000232792	FTH1P25	0	1
ENSG00000218213	FTH1P26	0	1
ENSG00000234355	FTH1P27	0	1
ENSG00000213453	FTH1P3	-0.875103798	2.39E-06
ENSG00000242992	FTH1P4	-1.150246645	1.34E-05
ENSG00000230204	FTH1P5	-1.283089381	1.06E-10
ENSG00000233083	FTH1P6	0	1
ENSG00000232187	FTH1P7	-1.109868168	2.26E-14
ENSG00000219507	FTH1P8	-0.901466362	1.88E-14
ENSG00000251395	FTH1P9	0	1
ENSG00000132446	FTHL17	0	1
ENSG00000087086	FTL	-0.045845128	1
ENSG00000235525	FTLP1	0.125296778	1
ENSG00000250426	FTLP10	0.228370431	1
ENSG00000265095	FTLP12	0	1
ENSG00000263725	FTLP13	0	1
ENSG00000260459	FTLP14	-1.789943949	1
ENSG00000233952	FTLP15	0.011652451	1
ENSG00000229735	FTLP16	3.660762331	0.530426505
ENSG00000228347	FTLP17	-0.273014315	0.684243672
ENSG00000230214	FTLP18	0	1
ENSG00000237913	FTLP19	1.968064759	1
ENSG00000232368	FTLP2	0.058369358	1
ENSG00000226608	FTLP3	-0.075374213	1
ENSG00000214020	FTLP4	0	1
ENSG00000266989	FTLP5	-0.499720806	0.528612084
ENSG00000254984	FTLP6	0	1
ENSG00000232217	FTLP8	-1.790042574	1
ENSG00000181867	FTMT	0	1
ENSG00000140718	FTO	-0.022418353	1
ENSG00000260936	FTO-IT1	0.522833643	1
ENSG00000226491	FTOP1	-0.409407198	1
ENSG00000068438	FTSJ1	0.228215543	0.145528726
ENSG00000122687	FTSJ2	0.11873573	0.829061128
ENSG00000108592	FTSJ3	0.142603175	0.527371667
ENSG00000180917	FTSJD1	0.081016684	1
ENSG00000137200	FTSJD2	-0.006709778	1
ENSG00000230590	FTX	0.299278915	1
ENSG00000162613	FUBP1	-0.043275356	1
ENSG00000107164	FUBP3	0.266640522	0.079954518
ENSG00000179163	FUCA1	-0.299256649	0.488772154
ENSG00000237053	FUCA1P1	1.494128893	1
ENSG00000001036	FUCA2	-0.283247764	0.057392954
ENSG00000157353	FUK	0.056895581	1
ENSG00000069509	FUNDC1	0.024365283	1
ENSG00000165775	FUNDC2	-0.014858516	1
ENSG00000182814	FUNDC2P2	0.181874779	1
ENSG00000187103	FUNDC2P3	-1.765335941	0.783919238
ENSG00000227009	FUNDC2P4	-0.961068318	1
ENSG00000148803	FUOM	-0.422184874	0.286441313
ENSG00000140564	FURIN	0.16901756	0.343243175
ENSG00000089280	FUS	0.050643128	1
ENSG00000174951	FUT1	1.831619949	1.77E-06
ENSG00000172728	FUT10	0.033098528	1
ENSG00000196968	FUT11	-0.486868094	0.001109366
ENSG00000176920	FUT2	-1.18514735	0.663237425
ENSG00000171124	FUT3	2.977115085	0.086353222
ENSG00000196371	FUT4	0.253586313	0.474401349
ENSG00000130383	FUT5	-0.009887387	1
ENSG00000156413	FUT6	1.396209073	1
ENSG00000180549	FUT7	1.968899115	1
ENSG00000033170	FUT8	-0.490926112	0.000204327
ENSG00000172461	FUT9	-0.456358992	0.947998042
ENSG00000010361	FUZ	-0.197100172	0.783919238
ENSG00000165060	FXN	0.707611636	5.60E-07
ENSG00000114416	FXR1	-0.111029159	0.845720266
ENSG00000129245	FXR2	0.566374659	8.05E-06
ENSG00000266964	FXYD1	-0.275359872	1
ENSG00000137731	FXYD2	-1.309481092	0.121404166
ENSG00000089356	FXYD3	-1.789943949	1
ENSG00000150201	FXYD4	0	1
ENSG00000089327	FXYD5	-0.274076268	0.077835258
ENSG00000137726	FXYD6	-2.231437976	2.94E-10
ENSG00000255245	FXYD6-FXYD2	-2.360309343	2.26E-11
ENSG00000235964	FXYD6P2	0	1
ENSG00000182707	FXYD6P3	0	1
ENSG00000221946	FXYD7	-1.147945326	0.954120814
ENSG00000082074	FYB	-0.767158071	0.031330123
ENSG00000163820	FYCO1	0.093313108	1
ENSG00000010810	FYN	0.317779502	0.145762735
ENSG00000122068	FYTTD1	0.178074865	0.425241864
ENSG00000234502	FYTTD1P1	1.494030267	1
ENSG00000157240	FZD1	-1.280626749	3.12E-10
ENSG00000111432	FZD10	-0.868099629	1
ENSG00000180340	FZD2	-1.953585611	2.48E-32
ENSG00000104290	FZD3	0.576706928	0.00043886
ENSG00000174804	FZD4	-0.061898636	1
ENSG00000163251	FZD5	0.661212367	1.96E-05
ENSG00000164930	FZD6	-0.259105066	0.114294723
ENSG00000155760	FZD7	-0.096258291	1
ENSG00000177283	FZD8	1.334011303	6.38E-17
ENSG00000188763	FZD9	-0.023490921	1
ENSG00000105325	FZR1	-0.46704518	0.000118964
ENSG00000123689	G0S2	0.232011665	0.713658885
ENSG00000092140	G2E3	0.050166512	1
ENSG00000145907	G3BP1	-0.18456013	0.262815536
ENSG00000138757	G3BP2	0.15592935	0.450044131
ENSG00000131482	G6PC	0.720926181	1
ENSG00000152254	G6PC2	2.77084622	1
ENSG00000141349	G6PC3	-0.424967744	0.001286713
ENSG00000160211	G6PD	-0.57664265	4.42E-08
ENSG00000171298	GAA	-0.044446905	1
ENSG00000109458	GAB1	-0.371666656	0.005161438
ENSG00000033327	GAB2	-0.14031827	0.843229823
ENSG00000160219	GAB3	0.453435733	0.579032398
ENSG00000215568	GAB4	-0.665226983	1
ENSG00000170296	GABARAP	-0.858957658	5.95E-12
ENSG00000139112	GABARAPL1	0.186634603	0.530426505
ENSG00000034713	GABARAPL2	0.15673561	0.620907081
ENSG00000238244	GABARAPL3	0.151928241	1
ENSG00000204681	GABBR1	-0.161874065	0.490754144
ENSG00000206466	GABBR1	0	1
ENSG00000206511	GABBR1	0	1
ENSG00000232569	GABBR1	0	1
ENSG00000232632	GABBR1	0	1
ENSG00000237051	GABBR1	0	1
ENSG00000237112	GABBR1	0	1
ENSG00000136928	GABBR2	-0.113119991	1
ENSG00000154727	GABPA	-0.004176775	1
ENSG00000104064	GABPB1	-0.154501478	0.809680039
ENSG00000244879	GABPB1-AS1	-0.078041126	1
ENSG00000143458	GABPB2	0.009671722	1
ENSG00000022355	GABRA1	-0.596501893	1
ENSG00000151834	GABRA2	0.654926833	0.00435441
ENSG00000011677	GABRA3	-0.413698071	0.143728589
ENSG00000109158	GABRA4	0.178464133	1
ENSG00000186297	GABRA5	1.708720268	9.78E-40
ENSG00000145863	GABRA6	-0.219075103	1
ENSG00000163288	GABRB1	0.539328646	0.628402051
ENSG00000145864	GABRB2	0.893162265	0.008332681
ENSG00000166206	GABRB3	0.675727803	3.24E-08
ENSG00000187730	GABRD	0.54244986	1
ENSG00000102287	GABRE	3.662080961	0.530426505
ENSG00000163285	GABRG1	-0.82362207	0.922847702
ENSG00000113327	GABRG2	-1.856548598	0.001647201
ENSG00000182256	GABRG3	0.055547674	1
ENSG00000094755	GABRP	0.800831065	0.87943317
ENSG00000147402	GABRQ	-0.556655919	0.685546281
ENSG00000146276	GABRR1	0.049230761	1
ENSG00000111886	GABRR2	-0.575104714	0.011683256
ENSG00000183185	GABRR3	0.223445507	1
ENSG00000128683	GAD1	1.044917593	0.344154573
ENSG00000136750	GAD2	-0.111117023	1
ENSG00000116717	GADD45A	0.196574301	0.317522169
ENSG00000099860	GADD45B	-0.305677975	0.185878216
ENSG00000130222	GADD45G	-3.437453706	0.530426505
ENSG00000179271	GADD45GIP1	0.051804764	1
ENSG00000144644	GADL1	0.522773857	1
ENSG00000205777	GAGE1	0.981735162	1
ENSG00000215274	GAGE10	2.77084622	1
ENSG00000236737	GAGE12B	0	1
ENSG00000237671	GAGE12C	1.096085619	1
ENSG00000227488	GAGE12D	0.980461122	1
ENSG00000216649	GAGE12E	-1.789943949	1
ENSG00000236362	GAGE12F	0	1
ENSG00000215269	GAGE12G	0.980803646	1
ENSG00000224902	GAGE12H	-1.789943949	1
ENSG00000241465	GAGE12I	0.981636537	1
ENSG00000224659	GAGE12J	-1.790494539	1
ENSG00000237597	GAGE13	-1.789943949	1
ENSG00000189064	GAGE2A	0.59522755	1
ENSG00000231850	GAGE2B	0.207504492	1
ENSG00000236249	GAGE2C	-1.467908985	1
ENSG00000240257	GAGE2D	0.980803646	1
ENSG00000205775	GAGE2E	-1.097372343	1
ENSG00000178950	GAK	0.433382134	0.000334397
ENSG00000069482	GAL	-1.09816605	1
ENSG00000128242	GAL3ST1	-0.602141685	1
ENSG00000154252	GAL3ST2	-0.667947745	1
ENSG00000175229	GAL3ST3	-0.294444036	1
ENSG00000197093	GAL3ST4	0.678418659	0.183171571
ENSG00000054983	GALC	-0.023984505	1
ENSG00000117308	GALE	-0.377263929	0.00563748
ENSG00000108479	GALK1	-0.362462965	0.051691849
ENSG00000156958	GALK2	-0.161399625	0.845301151
ENSG00000143891	GALM	0.166575731	0.922847702
ENSG00000141012	GALNS	0.050180754	1
ENSG00000141429	GALNT1	-0.011948961	1
ENSG00000164574	GALNT10	-0.687827816	3.11E-08
ENSG00000178234	GALNT11	-0.202963461	0.839452475
ENSG00000119514	GALNT12	0.3969404	1
ENSG00000144278	GALNT13	0.644692983	0.007826977
ENSG00000158089	GALNT14	0.713497973	5.07E-11
ENSG00000131386	GALNT15	-1.759870841	2.91E-13
ENSG00000100626	GALNT16	1.385465114	1.41E-30
ENSG00000110328	GALNT18	0.737106344	2.82E-12
ENSG00000143641	GALNT2	-0.226788494	0.104112338
ENSG00000115339	GALNT3	-0.596158569	1
ENSG00000257594	GALNT4	-0.25989458	1
ENSG00000136542	GALNT5	-1.013156885	0.019295199
ENSG00000139629	GALNT6	-0.095621592	1
ENSG00000109586	GALNT7	-0.646032185	1.20E-08
ENSG00000130035	GALNT8	-0.930128037	1.07E-05
ENSG00000182870	GALNT9	-0.806276061	0.028840647
ENSG00000106648	GALNTL5	-0.249786683	1
ENSG00000174473	GALNTL6	0.24442576	0.937122276
ENSG00000197487	GALP	0.719397037	1
ENSG00000166573	GALR1	-0.295825355	1
ENSG00000182687	GALR2	1.284426104	0.216808288
ENSG00000128310	GALR3	1.098284523	1
ENSG00000213930	GALT	-0.608753874	0.002647453
ENSG00000130005	GAMT	-0.660963779	0.000125839
ENSG00000231910	GAMTP2	0	1
ENSG00000127688	GAN	0.269603608	0.179434755
ENSG00000089597	GANAB	-0.392218061	0.00023247
ENSG00000214013	GANC	-0.296742584	0.43505843
ENSG00000172020	GAP43	1.060623738	1.08E-06
ENSG00000111640	GAPDH	-0.394665218	0.000129186
ENSG00000228232	GAPDHP1	-0.324746372	0.004182567
ENSG00000236056	GAPDHP14	-0.513400607	0.003179955
ENSG00000214563	GAPDHP15	-0.335942969	0.14868593
ENSG00000225502	GAPDHP16	0	1
ENSG00000229551	GAPDHP17	0	1
ENSG00000234529	GAPDHP19	0.706363231	0.970311513
ENSG00000236811	GAPDHP2	-0.278112056	0.222091261
ENSG00000224333	GAPDHP20	0.370286888	0.720329729
ENSG00000236993	GAPDHP21	-0.30990697	0.022660697
ENSG00000234005	GAPDHP22	0.2241488	1
ENSG00000235595	GAPDHP23	-0.734807015	0.883150025
ENSG00000185221	GAPDHP24	-0.870367385	0.072946114
ENSG00000213594	GAPDHP25	-0.209104285	0.474235377
ENSG00000229541	GAPDHP26	-0.48325563	1
ENSG00000239873	GAPDHP27	-0.402625837	0.754505594
ENSG00000213449	GAPDHP28	-0.388192666	0.298933253
ENSG00000178596	GAPDHP29	-0.211979142	0.474242899
ENSG00000235868	GAPDHP31	0.094531942	1
ENSG00000226443	GAPDHP32	-1.813812834	0.016287801
ENSG00000240244	GAPDHP33	1.387731945	0.210279854
ENSG00000235306	GAPDHP34	0	1
ENSG00000213158	GAPDHP36	-0.071943919	1
ENSG00000231907	GAPDHP37	-0.355552984	0.514854671
ENSG00000249210	GAPDHP38	-0.364765801	0.001705176
ENSG00000239207	GAPDHP39	-0.744485012	0.000475237
ENSG00000248626	GAPDHP40	-0.342187009	0.002601286
ENSG00000214566	GAPDHP41	-0.208023506	0.6700544
ENSG00000219881	GAPDHP42	0.2337067	1
ENSG00000213352	GAPDHP44	-0.349840562	0.004460808
ENSG00000228312	GAPDHP45	0.029036706	1
ENSG00000224678	GAPDHP46	-0.283076348	0.295932252
ENSG00000243033	GAPDHP47	-1.206889772	0.922847702
ENSG00000232718	GAPDHP48	-3.437453706	0.530426505
ENSG00000234285	GAPDHP49	0	1
ENSG00000241861	GAPDHP50	1.968899115	1
ENSG00000236973	GAPDHP51	-0.028689307	1
ENSG00000235076	GAPDHP52	0.206279569	1
ENSG00000234069	GAPDHP53	0	1
ENSG00000226769	GAPDHP54	1.968064759	1
ENSG00000224055	GAPDHP55	-0.360855708	0.600202205
ENSG00000249018	GAPDHP56	-1.789943949	1
ENSG00000236167	GAPDHP57	0	1
ENSG00000229570	GAPDHP58	-0.109102303	1
ENSG00000231739	GAPDHP59	-0.271403814	1
ENSG00000248180	GAPDHP60	-0.317886361	0.01138413
ENSG00000248415	GAPDHP61	-0.194544155	0.273190051
ENSG00000251013	GAPDHP62	-0.160654884	0.795403289
ENSG00000218582	GAPDHP63	-0.376406224	0.000681285
ENSG00000231072	GAPDHP64	-0.229737766	0.433943811
ENSG00000235587	GAPDHP65	-0.354964392	0.001396267
ENSG00000250933	GAPDHP66	-0.264875252	1
ENSG00000219930	GAPDHP67	-0.256175323	0.06899582
ENSG00000233876	GAPDHP68	-0.452275503	0.000415633
ENSG00000223460	GAPDHP69	-0.388030679	0.005510996
ENSG00000249489	GAPDHP70	-0.186001458	0.330979116
ENSG00000213376	GAPDHP71	-0.389795104	0.00154689
ENSG00000216624	GAPDHP72	-0.310719272	0.009168918
ENSG00000226540	GAPDHP73	-0.111459986	0.880394116
ENSG00000105679	GAPDHS	0.310193896	0.070342447
ENSG00000175857	GAPT	0	1
ENSG00000165219	GAPVD1	0.144953028	0.597287243
ENSG00000109534	GAR1	0.491855571	5.06E-05
ENSG00000141441	GAREM	-0.087666957	1
ENSG00000157833	GAREML	0.755302314	1.88E-12
ENSG00000136895	GARNL3	0.852280046	6.48E-08
ENSG00000106105	GARS	0.318640028	0.006702039
ENSG00000159131	GART	0.211687079	0.155090287
ENSG00000180447	GAS1	-2.250097105	9.87E-09
ENSG00000148935	GAS2	-0.316452641	1
ENSG00000185340	GAS2L1	-0.320581502	0.030806223
ENSG00000132139	GAS2L2	2.771188826	1
ENSG00000139354	GAS2L3	-0.156468044	0.752782298
ENSG00000234741	GAS5	0.031075361	1
ENSG00000183087	GAS6	-1.01525744	3.91E-21
ENSG00000233695	GAS6-AS1	-0.43215672	0.003563564
ENSG00000007237	GAS7	-0.037273941	1
ENSG00000141013	GAS8	0.660066283	1.15E-05
ENSG00000184502	GAST	-1.789943949	1
ENSG00000102145	GATA1	1.968064759	1
ENSG00000179348	GATA2	-1.017994726	0.037198478
ENSG00000107485	GATA3	0.220127166	0.976741837
ENSG00000197308	GATA3-AS1	4.208176916	0.18756724
ENSG00000136574	GATA4	0.687893094	1.25E-05
ENSG00000130700	GATA5	-1.788635699	0.000770021
ENSG00000141448	GATA6	0.206622174	1
ENSG00000157259	GATAD1	0.078794345	1
ENSG00000167491	GATAD2A	0.483743676	1.08E-05
ENSG00000143614	GATAD2B	0.037080873	1
ENSG00000257218	GATC	0.386727374	0.023913953
ENSG00000171766	GATM	0.15897886	1
ENSG00000239521	GATS	-0.504817076	0.002233529
ENSG00000183086	GATSL1	-0.138849847	1
ENSG00000198750	GATSL2	-0.335192744	0.722487376
ENSG00000239282	GATSL3	-1.21331119	0.023112485
ENSG00000177628	GBA	-0.661133409	2.91E-08
ENSG00000070610	GBA2	0.173960598	0.365040743
ENSG00000249948	GBA3	-0.262412933	0.126165527
ENSG00000160766	GBAP1	-0.638206831	1.11E-05
ENSG00000146729	GBAS	0.174988983	0.493641802
ENSG00000114480	GBE1	-0.366639193	0.01040589
ENSG00000107862	GBF1	-0.120430916	0.807847931
ENSG00000148288	GBGT1	-1.789943949	1
ENSG00000117228	GBP1	-1.866411009	7.43E-07
ENSG00000225492	GBP1P1	-1.65753842	0.003438546
ENSG00000162645	GBP2	-1.780425743	0.000631028
ENSG00000117226	GBP3	-1.558999428	2.46E-07
ENSG00000162654	GBP4	-3.4368081	0.530426505
ENSG00000154451	GBP5	-0.961011848	1
ENSG00000183347	GBP6	1.097552164	1
ENSG00000213512	GBP7	-1.034271089	0.720076559
ENSG00000164900	GBX1	2.046489944	0.039868989
ENSG00000168505	GBX2	0	1
ENSG00000145321	GC	0.595909892	1
ENSG00000115271	GCA	-0.975551839	2.32E-05
ENSG00000100116	GCAT	0.815211367	3.55E-07
ENSG00000179562	GCC1	-0.20996297	0.225262751
ENSG00000135968	GCC2	0.198464665	0.391201926
ENSG00000105607	GCDH	0.056973098	1
ENSG00000005436	GCFC2	0.289260908	0.034876557
ENSG00000115263	GCG	-3.06568222	0.839452475
ENSG00000215644	GCGR	1.968408083	1
ENSG00000131979	GCH1	0.535354913	0.113360544
ENSG00000137880	GCHFR	-0.693529646	0.719935852
ENSG00000106633	GCK	1.328213895	0.597492478
ENSG00000084734	GCKR	0.685350001	1
ENSG00000001084	GCLC	0.39719727	0.00463591
ENSG00000023909	GCLM	-0.521582269	0.001812232
ENSG00000137270	GCM1	0.473669745	1
ENSG00000124827	GCM2	-0.595765955	1
ENSG00000089154	GCN1L1	0.201059589	0.159740161
ENSG00000187210	GCNT1	-0.072434331	1
ENSG00000236474	GCNT1P1	-2.565017808	1
ENSG00000249206	GCNT1P2	0	1
ENSG00000231047	GCNT1P3	0	1
ENSG00000219653	GCNT1P4	0	1
ENSG00000237620	GCNT1P5	0	1
ENSG00000111846	GCNT2	-0.900326288	2.02E-07
ENSG00000140297	GCNT3	0.397682169	0.107375161
ENSG00000176928	GCNT4	0.21746118	1
ENSG00000205318	GCNT6	0.206868151	1
ENSG00000124091	GCNT7	0.158004994	0.533060769
ENSG00000137878	GCOM1	0.044175141	1
ENSG00000227725	GCOM2	-0.017158721	1
ENSG00000174500	GCSAM	-0.117583771	1
ENSG00000169224	GCSAML	-0.652816233	1
ENSG00000227135	GCSAML-AS1	0	1
ENSG00000140905	GCSH	0.073560032	1
ENSG00000248651	GCSHP1	-0.960488421	1
ENSG00000259525	GCSHP2	-0.197306825	1
ENSG00000237580	GCSHP3	0.181162393	1
ENSG00000256171	GCSHP4	-1.790494539	1
ENSG00000224837	GCSHP5	-0.032133873	1
ENSG00000119125	GDA	0.636119078	0.662779236
ENSG00000104381	GDAP1	0.676646408	0.000380969
ENSG00000124194	GDAP1L1	0.336730255	1
ENSG00000196505	GDAP2	0.426619637	0.023326956
ENSG00000006007	GDE1	-0.113956931	0.932090587
ENSG00000130283	GDF1	1.336285787	1.23E-12
ENSG00000107623	GDF10	0	1
ENSG00000135414	GDF11	-0.226171811	0.182366844
ENSG00000130513	GDF15	0.096795446	1
ENSG00000128802	GDF2	0	1
ENSG00000184344	GDF3	3.284562432	0.839452475
ENSG00000125965	GDF5	-0.622571627	1
ENSG00000204183	GDF5OS	0.178464133	1
ENSG00000156466	GDF6	0	1
ENSG00000143869	GDF7	-0.145897445	1
ENSG00000164404	GDF9	-0.06553936	1
ENSG00000203879	GDI1	-0.006616664	1
ENSG00000057608	GDI2	-0.229357853	0.093911512
ENSG00000229165	GDI2P1	-0.205752633	0.881088403
ENSG00000233994	GDI2P2	-0.39408549	0.023954467
ENSG00000168621	GDNF	1.852508246	0.688581822
ENSG00000248587	GDNF-AS1	-2.56446824	1
ENSG00000153982	GDPD1	0.779214566	0.019298615
ENSG00000130055	GDPD2	-0.679553829	0.82278999
ENSG00000102886	GDPD3	-0.681462548	0.218036286
ENSG00000178795	GDPD4	0.320464838	1
ENSG00000158555	GDPD5	-0.002476195	1
ENSG00000183208	GDPGP1	0.110583289	1
ENSG00000164949	GEM	0.789250059	2.84E-10
ENSG00000092208	GEMIN2	-0.105225449	1
ENSG00000179409	GEMIN4	0.366152265	0.003500456
ENSG00000082516	GEMIN5	1.041895728	6.52E-24
ENSG00000152147	GEMIN6	-0.032729746	1
ENSG00000142252	GEMIN7	0.336239621	0.094080432
ENSG00000046647	GEMIN8	0.080455512	1
ENSG00000260451	GEMIN8P2	3.961165471	0.320796081
ENSG00000223772	GEMIN8P3	0	1
ENSG00000228175	GEMIN8P4	0.079497829	1
ENSG00000178295	GEN1	-0.353148941	0.057560229
ENSG00000239857	GET4	0.370443363	0.002037735
ENSG00000131095	GFAP	-0.259943129	1
ENSG00000127554	GFER	-0.300335756	0.070717192
ENSG00000162676	GFI1	0.570540403	0.138953069
ENSG00000165702	GFI1B	0.545334773	1
ENSG00000168827	GFM1	0.412349389	0.001736666
ENSG00000164347	GFM2	0.366615539	0.011016157
ENSG00000145990	GFOD1	1.670146366	1.30E-35
ENSG00000237786	GFOD1-AS1	1.808357223	2.84E-05
ENSG00000141098	GFOD2	0.499039967	6.76E-05
ENSG00000198380	GFPT1	0.167690485	0.412667711
ENSG00000131459	GFPT2	0.128405544	1
ENSG00000151892	GFRA1	-0.334933693	1
ENSG00000168546	GFRA2	0.238553591	1
ENSG00000146013	GFRA3	1.475535386	0.305843913
ENSG00000125861	GFRA4	0	1
ENSG00000187871	GFRAL	-1.526301019	0.433230769
ENSG00000100083	GGA1	0.414168659	0.000622896
ENSG00000103365	GGA2	0.335350062	0.008925328
ENSG00000125447	GGA3	0.152774122	0.530426505
ENSG00000134864	GGACT	-0.153466195	0.826138799
ENSG00000006625	GGCT	-0.220513317	0.386545641
ENSG00000115486	GGCX	-0.582075024	9.84E-06
ENSG00000137563	GGH	-0.656088083	4.73E-08
ENSG00000179168	GGN	0.452660717	0.724737913
ENSG00000204188	GGNBP1	0.235614905	1
ENSG00000005955	GGNBP2	-0.277338336	0.071151804
ENSG00000152904	GGPS1	-0.024563733	1
ENSG00000100031	GGT1	-0.354938464	0.209291752
ENSG00000133475	GGT2	-0.05376908	1
ENSG00000197421	GGT3P	0.163898087	1
ENSG00000099998	GGT5	0.397851406	1
ENSG00000167741	GGT6	0	1
ENSG00000131067	GGT7	0.36232717	0.005183671
ENSG00000236969	GGT8P	-0.183692121	1
ENSG00000204136	GGTA1P	0.406309811	1
ENSG00000149435	GGTLC1	-0.57274345	1
ENSG00000100121	GGTLC2	0.170738087	1
ENSG00000183038	GGTLC3	0.594678961	1
ENSG00000259384	GH1	-2.564566651	1
ENSG00000136487	GH2	-2.565567584	1
ENSG00000167925	GHDC	-0.152870686	0.945350599
ENSG00000165678	GHITM	0.097616534	0.922847702
ENSG00000112964	GHR	0.412418378	0.006376761
ENSG00000118702	GHRH	1.643400564	0.688581822
ENSG00000106128	GHRHR	0.228808864	1
ENSG00000157017	GHRL	0.238176627	1
ENSG00000240288	GHRLOS	-0.01869598	1
ENSG00000121853	GHSR	0	1
ENSG00000141034	GID4	0.393027067	0.082800009
ENSG00000101193	GID8	-0.152057578	0.664577757
ENSG00000134812	GIF	0.981293816	1
ENSG00000146830	GIGYF1	0.2953011	0.026787133
ENSG00000204120	GIGYF2	0.116437296	0.89698207
ENSG00000213203	GIMAP1	0	1
ENSG00000106560	GIMAP2	-0.167166328	1
ENSG00000133574	GIMAP4	0	1
ENSG00000196329	GIMAP5	-1.291649162	0.333043958
ENSG00000133561	GIMAP6	-3.065780426	0.839452475
ENSG00000179144	GIMAP7	0	1
ENSG00000171115	GIMAP8	-0.596403481	1
ENSG00000250298	GIMD1	0	1
ENSG00000145723	GIN1	0.384927457	0.56751608
ENSG00000055211	GINM1	-0.396283287	0.047234658
ENSG00000101003	GINS1	-0.308911483	0.088537157
ENSG00000131153	GINS2	-0.472807367	0.000606324
ENSG00000181938	GINS3	0.513935425	0.000114253
ENSG00000147536	GINS4	-0.460809874	0.00012273
ENSG00000159224	GIP	-0.015682233	1
ENSG00000123159	GIPC1	-0.251967399	0.083548487
ENSG00000137960	GIPC2	-0.080354832	1
ENSG00000179855	GIPC3	-0.851476607	9.52E-05
ENSG00000010310	GIPR	-0.587098846	1
ENSG00000108262	GIT1	0.081692732	1
ENSG00000139436	GIT2	-0.371129503	0.026582952
ENSG00000152661	GJA1	0.579461816	6.14E-07
ENSG00000135355	GJA10	0	1
ENSG00000121743	GJA3	-1.763309948	0.783919238
ENSG00000187513	GJA4	0.980803646	1
ENSG00000143140	GJA5	-0.596600311	1
ENSG00000236187	GJA6P	0	1
ENSG00000121634	GJA8	0	1
ENSG00000131233	GJA9	0.342747509	0.171140681
ENSG00000169562	GJB1	-1.790042574	1
ENSG00000165474	GJB2	0.17757022	1
ENSG00000188910	GJB3	0.257193075	0.507984826
ENSG00000189433	GJB4	1.968408083	1
ENSG00000189280	GJB5	0.206279569	1
ENSG00000121742	GJB6	0	1
ENSG00000164411	GJB7	0.669431052	0.029805685
ENSG00000182963	GJC1	-0.815622996	4.05E-14
ENSG00000198835	GJC2	0.011270102	1
ENSG00000176402	GJC3	-0.961419442	1
ENSG00000159248	GJD2	0	1
ENSG00000183153	GJD3	-0.731892644	0.845518412
ENSG00000177291	GJD4	-3.97630214	0.320796081
ENSG00000203733	GJE1	0	1
ENSG00000198814	GK	-0.366542384	1
ENSG00000243055	GK-AS1	-0.249882165	1
ENSG00000229331	GK-IT1	-1.789943949	1
ENSG00000196475	GK2	0	1
ENSG00000229894	GK3P	-0.524847912	1
ENSG00000175066	GK5	-0.23639021	0.844124999
ENSG00000165113	GKAP1	-0.602780389	0.036570638
ENSG00000169605	GKN1	2.772169562	1
ENSG00000183607	GKN2	1.968408083	1
ENSG00000102393	GLA	-0.172810626	0.620645812
ENSG00000170266	GLB1	-0.381149627	0.003947661
ENSG00000163521	GLB1L	-0.372778102	0.432565863
ENSG00000149328	GLB1L2	0.206868151	1
ENSG00000166105	GLB1L3	0.229323881	1
ENSG00000106415	GLCCI1	0.645584068	0.009313689
ENSG00000138604	GLCE	-0.448078931	0.00313945
ENSG00000178445	GLDC	-0.151035068	0.85700219
ENSG00000248590	GLDCP1	1.968899115	1
ENSG00000186417	GLDN	-0.296570067	0.99250527
ENSG00000119392	GLE1	-0.2700698	0.071410846
ENSG00000090863	GLG1	-0.234575935	0.083340929
ENSG00000111087	GLI1	-1.144849216	4.27E-11
ENSG00000074047	GLI2	-0.280828713	0.055390804
ENSG00000106571	GLI3	-0.394872801	0.013933843
ENSG00000250571	GLI4	-0.45815558	0.006918084
ENSG00000139278	GLIPR1	-0.037962601	1
ENSG00000173401	GLIPR1L1	-1.304079644	0.003753132
ENSG00000180481	GLIPR1L2	-0.961076722	1
ENSG00000122694	GLIPR2	-1.399870417	1.20E-10
ENSG00000174332	GLIS1	-0.440088971	1
ENSG00000126603	GLIS2	0.257092562	0.177795451
ENSG00000107249	GLIS3	0.281148492	0.809304306
ENSG00000237009	GLIS3-AS1	0.718918346	1
ENSG00000174842	GLMN	0.054016108	1
ENSG00000124767	GLO1	-0.258452018	0.064621458
ENSG00000167699	GLOD4	-0.016043061	1
ENSG00000171433	GLOD5	1.872038386	1
ENSG00000112164	GLP1R	-0.294796182	1
ENSG00000065325	GLP2R	-0.635953454	0.00226252
ENSG00000145888	GLRA1	0.563270268	0.283168135
ENSG00000101958	GLRA2	-0.003708186	1
ENSG00000145451	GLRA3	0.146543592	1
ENSG00000188828	GLRA4	3.283241606	0.839452475
ENSG00000109738	GLRB	-0.919454783	0.014393473
ENSG00000173221	GLRX	-0.544893913	6.37E-07
ENSG00000023572	GLRX2	0.125593782	1
ENSG00000108010	GLRX3	0.604006903	3.47E-07
ENSG00000182512	GLRX5	0.053890209	1
ENSG00000118990	GLRXP3	-0.392612849	1
ENSG00000115419	GLS	0.144844261	0.589391454
ENSG00000135423	GLS2	-0.049346268	1
ENSG00000151948	GLT1D1	0.325399303	0.970311513
ENSG00000130309	GLT25D1	-0.009467032	1
ENSG00000198756	GLT25D2	0.156036831	1
ENSG00000204007	GLT6D1	0.206720586	1
ENSG00000016864	GLT8D1	-0.021224108	1
ENSG00000120820	GLT8D2	-0.142757612	0.540215178
ENSG00000139433	GLTP	-0.213552589	0.443104185
ENSG00000224051	GLTPD1	-0.619725062	0.003963805
ENSG00000182327	GLTPD2	-2.052389191	0.061426034
ENSG00000255138	GLTPP1	-0.038344534	1
ENSG00000063169	GLTSCR1	-0.129496267	1
ENSG00000112624	GLTSCR1L	-0.351458196	0.105323735
ENSG00000105373	GLTSCR2	0.12887569	0.783919238
ENSG00000148672	GLUD1	0.386031585	0.001948243
ENSG00000227781	GLUD1P2	-0.335993999	1
ENSG00000250959	GLUD1P3	0.116891737	1
ENSG00000267486	GLUD1P4	0.981872333	0.531554429
ENSG00000231209	GLUD1P6	0.390099868	0.882610415
ENSG00000227194	GLUD1P7	0.422630212	0.890016094
ENSG00000232567	GLUD1P8	0.487468485	0.969894264
ENSG00000234349	GLUD1P9	2.77084622	1
ENSG00000182890	GLUD2	0.400723877	0.003612934
ENSG00000135821	GLUL	0.323006265	0.043773688
ENSG00000254572	GLULP3	0.239223519	1
ENSG00000178723	GLULP4	0.528775764	0.307413601
ENSG00000257915	GLULP5	0	1
ENSG00000215043	GLULP6	0.442402249	1
ENSG00000149124	GLYAT	-0.042272836	1
ENSG00000166840	GLYATL1	-0.634711316	0.242287873
ENSG00000255189	GLYATL1P1	0.217010797	1
ENSG00000254717	GLYATL1P2	-0.331904259	0.624805408
ENSG00000255151	GLYATL1P3	0.71871311	1
ENSG00000254399	GLYATL1P4	-4.186643648	0.107780781
ENSG00000156689	GLYATL2	-0.493977421	0.060146146
ENSG00000203972	GLYATL3	3.284072842	0.839452475
ENSG00000257780	GLYCAM1	0	1
ENSG00000168237	GLYCTK	0.000602867	1
ENSG00000242797	GLYCTK-AS1	0.018428564	1
ENSG00000140632	GLYR1	0.085885719	1
ENSG00000196743	GM2A	-0.947594415	1.10E-10
ENSG00000241695	GM2AP1	-0.409116979	1
ENSG00000239428	GM2AP2	1.968899115	1
ENSG00000087338	GMCL1	-0.182954936	0.768564856
ENSG00000244234	GMCL1P1	0.687369569	0.146127097
ENSG00000112699	GMDS	0.428463523	0.03455122
ENSG00000162419	GMEB1	0.374014621	0.032233183
ENSG00000101216	GMEB2	0.368173101	0.026728124
ENSG00000197045	GMFB	-0.002307131	1
ENSG00000243495	GMFBP1	-0.28670198	0.842696959
ENSG00000130755	GMFG	-0.808772222	0.230330202
ENSG00000089639	GMIP	0.082725778	1
ENSG00000104499	GML	-0.023525013	1
ENSG00000205835	GMNC	0.082525084	1
ENSG00000112312	GMNN	-0.129129438	1
ENSG00000144591	GMPPA	-0.459221241	0.000589241
ENSG00000173540	GMPPB	-0.200801681	0.266271426
ENSG00000137198	GMPR	-0.579415134	0.872282548
ENSG00000100938	GMPR2	-0.185423533	0.607341379
ENSG00000163655	GMPS	0.23169901	0.119317562
ENSG00000250471	GMPSP1	0.44848593	0.030622364
ENSG00000088256	GNA11	0.08496397	1
ENSG00000146535	GNA12	-0.10888778	0.839452475
ENSG00000120063	GNA13	0.137561881	0.639439312
ENSG00000156049	GNA14	-0.233895067	1
ENSG00000060558	GNA15	-0.327088377	1
ENSG00000127955	GNAI1	0.12899024	1
ENSG00000114353	GNAI2	-1.309369737	7.80E-38
ENSG00000065135	GNAI3	-0.273305599	0.036153014
ENSG00000141404	GNAL	0.411110557	0.003634775
ENSG00000087258	GNAO1	-0.806621346	4.73E-06
ENSG00000156052	GNAQ	-0.72942478	0.003842865
ENSG00000214077	GNAQP1	-0.815148647	0.818588139
ENSG00000087460	GNAS	-0.446960524	1.13E-05
ENSG00000235590	GNAS-AS1	0.307664596	0.354495287
ENSG00000114349	GNAT1	0.178955165	1
ENSG00000134183	GNAT2	-0.164784923	1
ENSG00000214415	GNAT3	0.178022184	1
ENSG00000128266	GNAZ	-0.882554532	9.71E-11
ENSG00000078369	GNB1	-0.200347015	0.18756724
ENSG00000185838	GNB1L	-0.006399601	1
ENSG00000172354	GNB2	-0.219237526	0.13524308
ENSG00000204628	GNB2L1	0.106656553	0.803565461
ENSG00000111664	GNB3	-0.272138232	0.132353725
ENSG00000114450	GNB4	0.029632866	1
ENSG00000069966	GNB5	-0.484785722	0.004148629
ENSG00000159921	GNE	-0.417813434	0.00249034
ENSG00000242616	GNG10	-0.162447728	1
ENSG00000127920	GNG11	-1.32379527	0.00444187
ENSG00000172380	GNG12	-0.383709492	0.001238827
ENSG00000232284	GNG12-AS1	-0.336957175	0.016909939
ENSG00000127588	GNG13	-0.205859034	1
ENSG00000186469	GNG2	-0.934316532	0.065348498
ENSG00000162188	GNG3	0.005575157	1
ENSG00000168243	GNG4	0.185093415	1
ENSG00000174021	GNG5	-0.321122832	0.035673352
ENSG00000213536	GNG5P1	0.206279569	1
ENSG00000133136	GNG5P2	-0.099896702	1
ENSG00000254949	GNG5P3	-0.687423117	0.63617394
ENSG00000234590	GNG5P5	-0.017762372	1
ENSG00000176533	GNG7	-0.707501008	0.005216711
ENSG00000167414	GNG8	-1.789943949	1
ENSG00000127928	GNGT1	-0.403718691	0.005131603
ENSG00000167083	GNGT2	-1.106736696	6.91E-05
ENSG00000204590	GNL1	0.001833453	1
ENSG00000206412	GNL1	0	1
ENSG00000206492	GNL1	0	1
ENSG00000226882	GNL1	0	1
ENSG00000228581	GNL1	0	1
ENSG00000229470	GNL1	0	1
ENSG00000232143	GNL1	0	1
ENSG00000235986	GNL1	0	1
ENSG00000134697	GNL2	0.62957484	3.65E-09
ENSG00000163938	GNL3	0.447499492	9.01E-05
ENSG00000130119	GNL3L	0.333514127	0.016302759
ENSG00000215032	GNL3LP1	0.104685944	1
ENSG00000115523	GNLY	-0.596953049	1
ENSG00000124713	GNMT	-0.60249538	1
ENSG00000116906	GNPAT	-0.3184611	0.121404166
ENSG00000259844	GNPATP	0.232276953	1
ENSG00000113552	GNPDA1	0.218258037	0.158376836
ENSG00000163281	GNPDA2	-0.020414879	1
ENSG00000100522	GNPNAT1	0.478493796	0.000149062
ENSG00000111670	GNPTAB	-0.097581693	1
ENSG00000090581	GNPTG	0.256124029	0.155568716
ENSG00000147437	GNRH1	0.019681278	1
ENSG00000125787	GNRH2	-0.448095551	1
ENSG00000109163	GNRHR	0.048742459	1
ENSG00000211451	GNRHR2	0.059717668	1
ENSG00000135677	GNS	-0.107781784	0.850114644
ENSG00000136935	GOLGA1	-0.584754	0.000531749
ENSG00000167110	GOLGA2	0.073898124	1
ENSG00000205333	GOLGA2P1	0.162685513	1
ENSG00000239533	GOLGA2P2Y	0.455008074	1
ENSG00000172297	GOLGA2P3Y	-0.218957623	1
ENSG00000229608	GOLGA2P4	-0.448478145	1
ENSG00000238105	GOLGA2P5	0.268010396	0.971799595
ENSG00000241621	GOLGA2P6	-0.468112921	1
ENSG00000090615	GOLGA3	0.021422902	1
ENSG00000144674	GOLGA4	0.189516375	0.234344123
ENSG00000066455	GOLGA5	-0.067063493	1
ENSG00000251215	GOLGA5P1	1.096134645	1
ENSG00000159289	GOLGA6A	0.789334887	0.954120814
ENSG00000215186	GOLGA6B	0.228086008	1
ENSG00000167195	GOLGA6C	-1.414419703	0.922847702
ENSG00000140478	GOLGA6D	0.718223798	1
ENSG00000197414	GOLGA6L1	0.717674022	1
ENSG00000205281	GOLGA6L10	0.012624969	1
ENSG00000223698	GOLGA6L11P	0.228652508	1
ENSG00000197092	GOLGA6L16P	0.870557071	1
ENSG00000174450	GOLGA6L2	-1.790494539	1
ENSG00000188388	GOLGA6L3	-0.019454989	1
ENSG00000184206	GOLGA6L4	0.270283215	1
ENSG00000230373	GOLGA6L5	0.099717153	1
ENSG00000215405	GOLGA6L6	2.772169562	1
ENSG00000261649	GOLGA6L7P	-1.789943949	1
ENSG00000197978	GOLGA6L9	0.0922525	1
ENSG00000147533	GOLGA7	0.315219522	0.055489784
ENSG00000155265	GOLGA7B	0.642022171	0.318882841
ENSG00000175265	GOLGA8A	0.316678349	0.006801735
ENSG00000215252	GOLGA8B	0.595425823	8.81E-07
ENSG00000181984	GOLGA8CP	0.284677516	1
ENSG00000185182	GOLGA8DP	0.448148974	0.832886015
ENSG00000175676	GOLGA8EP	0.106194044	1
ENSG00000153684	GOLGA8F	0.580085075	0.628402051
ENSG00000183629	GOLGA8G	0.009113944	1
ENSG00000261794	GOLGA8H	-0.017002983	1
ENSG00000153666	GOLGA8I	-0.341694289	0.193486644
ENSG00000179938	GOLGA8J	0.073211206	1
ENSG00000249931	GOLGA8K	0.172293377	1
ENSG00000188626	GOLGA8M	-0.102696759	1
ENSG00000232653	GOLGA8N	-0.296746193	1
ENSG00000206127	GOLGA8O	0.007720561	1
ENSG00000178115	GOLGA8Q	-0.419241133	1
ENSG00000186399	GOLGA8R	0.349805149	1
ENSG00000261739	GOLGA8S	0.307854141	1
ENSG00000261247	GOLGA8T	0.014444213	1
ENSG00000103832	GOLGA8UP	0.391691872	0.818704476
ENSG00000173230	GOLGB1	-0.523271361	1.19E-05
ENSG00000173905	GOLIM4	-0.342869897	0.008771659
ENSG00000135052	GOLM1	0.148625652	0.51862615
ENSG00000113384	GOLPH3	-0.000366482	1
ENSG00000143457	GOLPH3L	-0.457647533	0.018501946
ENSG00000174567	GOLT1A	0.355738173	0.926069059
ENSG00000111711	GOLT1B	0.107253236	1
ENSG00000116580	GON4L	0.313623925	0.023055775
ENSG00000047932	GOPC	-0.450024566	5.93E-05
ENSG00000120370	GORAB	-0.065032081	1
ENSG00000114745	GORASP1	0.055108352	1
ENSG00000115806	GORASP2	0.173687833	0.378509283
ENSG00000108587	GOSR1	0.101669836	1
ENSG00000108433	GOSR2	0.401550698	0.001304518
ENSG00000120053	GOT1	-0.01091275	1
ENSG00000169154	GOT1L1	-2.565017808	1
ENSG00000125166	GOT2	0.261716692	0.037691351
ENSG00000231900	GOT2P1	-0.315312507	1
ENSG00000230849	GOT2P2	0.465624987	0.047110394
ENSG00000233719	GOT2P3	0.448392802	0.016357878
ENSG00000233634	GOT2P5	0.178022184	1
ENSG00000185245	GP1BA	-0.420029089	1
ENSG00000203618	GP1BB	-0.34297677	0.017376471
ENSG00000169347	GP2	-3.066779603	0.839452475
ENSG00000178732	GP5	0	1
ENSG00000088053	GP6	-0.839060144	0.005793327
ENSG00000169704	GP9	0	1
ENSG00000143167	GPA33	-1.085917247	1
ENSG00000197858	GPAA1	-0.650610544	7.34E-09
ENSG00000240069	GPAA1P1	-0.055226048	1
ENSG00000119927	GPAM	0.201930943	0.839452475
ENSG00000204438	GPANK1	0.397330046	0.003982621
ENSG00000206408	GPANK1	0	1
ENSG00000223932	GPANK1	0	1
ENSG00000228605	GPANK1	0	1
ENSG00000232312	GPANK1	0	1
ENSG00000233210	GPANK1	0	1
ENSG00000236011	GPANK1	0	1
ENSG00000186281	GPAT2	0.383039568	0.005256476
ENSG00000076650	GPATCH1	0.434501693	0.089493291
ENSG00000152133	GPATCH11	-0.130538774	1
ENSG00000092978	GPATCH2	0.068489228	1
ENSG00000089916	GPATCH2L	0.221180573	0.309804133
ENSG00000198746	GPATCH3	0.48783894	0.002409391
ENSG00000160818	GPATCH4	0.345026998	0.004551818
ENSG00000186566	GPATCH8	0.214487396	0.231493036
ENSG00000179921	GPBAR1	0.719055034	1
ENSG00000062194	GPBP1	0.183178194	0.389195738
ENSG00000159592	GPBP1L1	0.18093336	0.37811862
ENSG00000063660	GPC1	-0.937419822	1.12E-20
ENSG00000213420	GPC2	-0.188612072	1
ENSG00000147257	GPC3	-0.199470411	0.28922182
ENSG00000076716	GPC4	-0.29472144	0.436962357
ENSG00000179399	GPC5	0.548228262	0.090756852
ENSG00000235984	GPC5-AS1	-2.56446824	1
ENSG00000232885	GPC5-AS2	0	1
ENSG00000236240	GPC5-IT1	1.492955927	1
ENSG00000183098	GPC6	-0.47049597	0.033330895
ENSG00000236520	GPC6-AS1	0.178404576	1
ENSG00000224394	GPC6-AS2	-0.663522639	0.662779236
ENSG00000125772	GPCPD1	0.279811652	0.508253876
ENSG00000167588	GPD1	0.750527467	0.922847702
ENSG00000152642	GPD1L	1.513162921	1.27E-27
ENSG00000115159	GPD2	-0.360326739	0.010469556
ENSG00000164850	GPER	-0.430328491	0.03709363
ENSG00000149735	GPHA2	-1.790042574	1
ENSG00000179600	GPHB5	0	1
ENSG00000171723	GPHN	0.344332757	0.022409858
ENSG00000105220	GPI	0.155122187	0.414733092
ENSG00000182851	GPIHBP1	-1.084646772	1
ENSG00000068394	GPKOW	0.115775645	1
ENSG00000112293	GPLD1	0.410013057	0.328189238
ENSG00000150625	GPM6A	-0.152734281	1
ENSG00000046653	GPM6B	0.744452268	0.054378094
ENSG00000230458	GPM6BP1	0	1
ENSG00000236429	GPM6BP2	0	1
ENSG00000234121	GPM6BP3	0	1
ENSG00000198522	GPN1	0.412043056	0.000443308
ENSG00000142751	GPN2	0.640253175	1.77E-07
ENSG00000111231	GPN3	0.157275575	0.626395393
ENSG00000227465	GPN3P1	0.44089423	1
ENSG00000136235	GPNMB	-1.262325561	7.34E-15
ENSG00000183671	GPR1	-1.942729652	1.99E-05
ENSG00000165370	GPR101	3.284904551	0.839452475
ENSG00000148358	GPR107	-0.21501411	0.216370338
ENSG00000125734	GPR108	-0.428042883	0.016422805
ENSG00000153292	GPR110	0	1
ENSG00000164393	GPR111	2.349164408	0.146127097
ENSG00000156920	GPR112	-0.649344739	0.496927835
ENSG00000173567	GPR113	0.653992189	0.018254972
ENSG00000159618	GPR114	1.476019545	0.305843913
ENSG00000153294	GPR115	-0.163375978	1
ENSG00000069122	GPR116	1.674469731	0.02078132
ENSG00000147262	GPR119	0	1
ENSG00000132975	GPR12	2.591328318	0.016244332
ENSG00000197177	GPR123	0	1
ENSG00000020181	GPR124	-0.383307257	0.107241951
ENSG00000152990	GPR125	0.388944625	0.002441615
ENSG00000112414	GPR126	0.373965766	0.070116287
ENSG00000144820	GPR128	-0.160051623	1
ENSG00000183484	GPR132	0.719604602	1
ENSG00000111452	GPR133	-0.775734028	1.51E-09
ENSG00000181619	GPR135	0.401323429	0.410588959
ENSG00000173264	GPR137	-0.597208455	2.74E-07
ENSG00000077585	GPR137B	0.509222321	0.023437501
ENSG00000180998	GPR137C	-0.645256624	0.112093096
ENSG00000180269	GPR139	1.395512011	1
ENSG00000187037	GPR141	-1.220731831	0.060499264
ENSG00000257008	GPR142	0.981184572	1
ENSG00000101850	GPR143	0.763576958	0.845518412
ENSG00000232583	GPR143P	0	1
ENSG00000180264	GPR144	0.523528679	1
ENSG00000164849	GPR146	0.195637435	0.747079009
ENSG00000173302	GPR148	0	1
ENSG00000174948	GPR149	-0.143192951	1
ENSG00000154165	GPR15	0	1
ENSG00000178015	GPR150	0	1
ENSG00000173250	GPR151	0	1
ENSG00000175514	GPR152	0	1
ENSG00000158292	GPR153	-0.741767369	0.026114111
ENSG00000163328	GPR155	0.498093825	0.175097957
ENSG00000175697	GPR156	-0.081560499	1
ENSG00000180758	GPR157	0.341880247	0.200904729
ENSG00000151025	GPR158	0.128948816	1
ENSG00000233642	GPR158-AS1	-0.448176863	1
ENSG00000173890	GPR160	-0.015243122	1
ENSG00000143147	GPR161	-1.137070554	6.18E-09
ENSG00000250510	GPR162	-1.861227709	4.02E-31
ENSG00000144230	GPR17	-2.163427841	0.007166326
ENSG00000174946	GPR171	1.968899115	1
ENSG00000184194	GPR173	-0.528124301	0.010204961
ENSG00000147138	GPR174	0	1
ENSG00000166073	GPR176	-0.650227674	2.23E-08
ENSG00000188888	GPR179	-0.716350878	1
ENSG00000125245	GPR18	0	1
ENSG00000152749	GPR180	-0.321269838	0.33304153
ENSG00000166856	GPR182	-0.294894418	1
ENSG00000169508	GPR183	1.968408083	1
ENSG00000183150	GPR19	-0.598993487	0.002622197
ENSG00000204882	GPR20	-2.785875897	3.38E-05
ENSG00000188394	GPR21	0	1
ENSG00000172209	GPR22	0	1
ENSG00000170128	GPR25	0	1
ENSG00000154478	GPR26	0.178022184	1
ENSG00000170837	GPR27	0.993958465	0.000772801
ENSG00000181773	GPR3	1.2230574	1.31E-20
ENSG00000120436	GPR31	0	1
ENSG00000142511	GPR32	0	1
ENSG00000269565	GPR32P1	0	1
ENSG00000214943	GPR33	0	1
ENSG00000171659	GPR34	0.595751909	1
ENSG00000178623	GPR35	0.760661744	0.845518412
ENSG00000170775	GPR37	1.262968439	0.017056827
ENSG00000170075	GPR37L1	1.968064759	1
ENSG00000183840	GPR39	-0.10521589	1
ENSG00000177464	GPR4	-0.431963612	0.667505989
ENSG00000126251	GPR42	0	1
ENSG00000135973	GPR45	-0.311675104	0.487753194
ENSG00000102195	GPR50	0	1
ENSG00000234696	GPR50-AS1	0	1
ENSG00000203737	GPR52	0	1
ENSG00000224894	GPR53P	0	1
ENSG00000225274	GPR53P	0	1
ENSG00000227576	GPR53P	0	1
ENSG00000228993	GPR53P	0	1
ENSG00000229281	GPR53P	0	1
ENSG00000234992	GPR53P	0	1
ENSG00000237698	GPR53P	0	1
ENSG00000237811	GPR53P	0	1
ENSG00000135898	GPR55	-0.518185705	0.76395576
ENSG00000205336	GPR56	-0.309408135	0.029599761
ENSG00000146360	GPR6	0	1
ENSG00000156097	GPR61	-0.161469194	1
ENSG00000180929	GPR62	0.358847406	1
ENSG00000112218	GPR63	0.519308059	0.032674828
ENSG00000173698	GPR64	0.13623867	1
ENSG00000140030	GPR65	0	1
ENSG00000119714	GPR68	0.071703951	1
ENSG00000119737	GPR75	0.255470061	0.917473475
ENSG00000115239	GPR75-ASB3	0.143212093	0.659987824
ENSG00000155269	GPR78	0.702033948	2.39E-08
ENSG00000232374	GPR79	1.968408083	1
ENSG00000171657	GPR82	0.981293816	1
ENSG00000123901	GPR83	0.240295981	1
ENSG00000139572	GPR84	0	1
ENSG00000164604	GPR85	-0.563944745	1
ENSG00000138271	GPR87	-0.458396871	0.059148741
ENSG00000181656	GPR88	1.968064759	1
ENSG00000117262	GPR89A	0.714568988	1.95E-06
ENSG00000188092	GPR89B	0.482516683	0.013368633
ENSG00000196644	GPR89C	0.692331368	0.001128024
ENSG00000182885	GPR97	2.771188826	1
ENSG00000164199	GPR98	-0.108056365	1
ENSG00000198932	GPRASP1	0.037307156	1
ENSG00000158301	GPRASP2	-0.829605664	3.10E-06
ENSG00000013588	GPRC5A	0.125334288	0.735147544
ENSG00000167191	GPRC5B	0.764817985	0.001185154
ENSG00000170412	GPRC5C	0.72796295	9.40E-05
ENSG00000111291	GPRC5D	1.002021114	0.049096264
ENSG00000173612	GPRC6A	0.217293238	1
ENSG00000169258	GPRIN1	-0.647102599	2.28E-07
ENSG00000204175	GPRIN2	-1.762861164	1
ENSG00000185477	GPRIN3	-1.080218129	0.090594742
ENSG00000169727	GPS1	-0.09010798	1
ENSG00000132522	GPS2	-0.006334558	1
ENSG00000160360	GPSM1	0.103452993	1
ENSG00000121957	GPSM2	-1.06109367	8.51E-16
ENSG00000206314	GPSM3	0	1
ENSG00000213654	GPSM3	-0.832397196	1.23E-09
ENSG00000233490	GPSM3	0	1
ENSG00000234243	GPSM3	0	1
ENSG00000234508	GPSM3	0	1
ENSG00000236697	GPSM3	0	1
ENSG00000237052	GPSM3	0	1
ENSG00000167701	GPT	0.363911709	0.839452475
ENSG00000166123	GPT2	0.860083363	7.42E-16
ENSG00000233276	GPX1	-0.307486071	0.019894074
ENSG00000197582	GPX1P1	-0.413050803	0.008123157
ENSG00000215326	GPX1P2	-0.079489204	1
ENSG00000176153	GPX2	0.454792384	1
ENSG00000211445	GPX3	-0.659371307	8.13E-08
ENSG00000167468	GPX4	-0.456428758	4.36E-05
ENSG00000224586	GPX5	0	1
ENSG00000198704	GPX6	-0.154280502	1
ENSG00000116157	GPX7	-0.370232249	1
ENSG00000164294	GPX8	-1.072842476	3.86E-19
ENSG00000089351	GRAMD1A	-0.072868388	1
ENSG00000023171	GRAMD1B	0.561194775	1.04E-05
ENSG00000178075	GRAMD1C	-0.049109418	1
ENSG00000175318	GRAMD2	-0.847591822	1
ENSG00000155324	GRAMD3	-1.076142806	0.058099545
ENSG00000075240	GRAMD4	-0.688993989	0.000770155
ENSG00000227874	GRAMD4P1	0	1
ENSG00000235992	GRAMD4P2	-1.469143661	1
ENSG00000154016	GRAP	-0.112881414	1
ENSG00000100351	GRAP2	0.341219618	0.616845153
ENSG00000189152	GRAPL	0.981464702	1
ENSG00000161835	GRASP	-0.247874233	1
ENSG00000106070	GRB10	0.377588041	0.006301746
ENSG00000115290	GRB14	0.183705596	0.434518151
ENSG00000177885	GRB2	0.080482492	1
ENSG00000141738	GRB7	0.893179502	1
ENSG00000196208	GREB1	0.045593628	1
ENSG00000141449	GREB1L	0.453224311	0.229573143
ENSG00000166923	GREM1	0.072786868	1
ENSG00000180875	GREM2	0.073223245	1
ENSG00000134317	GRHL1	1.41042294	1.03E-10
ENSG00000083307	GRHL2	0.148368933	1
ENSG00000158055	GRHL3	-0.189360925	1
ENSG00000137106	GRHPR	-0.008828205	1
ENSG00000155511	GRIA1	0.350675499	1
ENSG00000120251	GRIA2	0.84766243	0.532376554
ENSG00000125675	GRIA3	0.371526974	1
ENSG00000152578	GRIA4	1.219657791	0.091736463
ENSG00000182771	GRID1	0.269518435	0.15991858
ENSG00000152208	GRID2	-0.370742358	0.013352256
ENSG00000215045	GRID2IP	0.182166164	1
ENSG00000236734	GRIFIN	0	1
ENSG00000171189	GRIK1	0.483339893	0.312432398
ENSG00000174680	GRIK1-AS1	0.206318582	1
ENSG00000183653	GRIK1-AS2	0.871296183	0.881088702
ENSG00000164418	GRIK2	0.103165638	1
ENSG00000163873	GRIK3	-1.016509275	0.881088702
ENSG00000149403	GRIK4	-0.085620613	1
ENSG00000105737	GRIK5	-0.130211704	1
ENSG00000176884	GRIN1	-0.666959174	1
ENSG00000183454	GRIN2A	0.595907527	0.006381657
ENSG00000150086	GRIN2B	1.06600328	0.019295199
ENSG00000161509	GRIN2C	-0.038916552	1
ENSG00000105464	GRIN2D	0.772963379	0.000493074
ENSG00000198785	GRIN3A	0.074061597	1
ENSG00000116032	GRIN3B	-0.443322658	0.152642228
ENSG00000178719	GRINA	-0.185698217	0.238539875
ENSG00000155974	GRIP1	0.219871291	0.783919238
ENSG00000144596	GRIP2	0.230357503	1
ENSG00000068400	GRIPAP1	-0.133015094	0.788710941
ENSG00000185974	GRK1	-3.065780426	0.839452475
ENSG00000125388	GRK4	0.495159275	0.223131816
ENSG00000198873	GRK5	0.466087129	0.03776576
ENSG00000198055	GRK6	-0.217992351	0.202800169
ENSG00000215571	GRK6P1	-0.424773007	0.12430066
ENSG00000114124	GRK7	0.524062298	1
ENSG00000152822	GRM1	0.097652323	1
ENSG00000164082	GRM2	0.442520454	1
ENSG00000198822	GRM3	-1.017398638	0.363101092
ENSG00000124493	GRM4	1.181777507	0.521224271
ENSG00000168959	GRM5	0.803408324	0.188455865
ENSG00000255082	GRM5-AS1	2.77084622	1
ENSG00000113262	GRM6	0.981636537	1
ENSG00000196277	GRM7	0.096475805	1
ENSG00000236202	GRM7-AS1	-0.294836	1
ENSG00000237665	GRM7-AS2	0	1
ENSG00000226258	GRM7-AS3	-0.173174426	0.981147082
ENSG00000179603	GRM8	-0.28095171	1
ENSG00000030582	GRN	-0.556689308	1.96E-07
ENSG00000134443	GRP	-1.790494539	1
ENSG00000109519	GRPEL1	0.921357463	8.25E-16
ENSG00000164284	GRPEL2	0.753422051	7.66E-10
ENSG00000233211	GRPEL2P1	0	1
ENSG00000225814	GRPEL2P2	-0.14297596	1
ENSG00000230682	GRPEL2P3	1.191409447	0.448297084
ENSG00000126010	GRPR	0.333636482	1
ENSG00000132463	GRSF1	0.448819523	3.36E-05
ENSG00000139835	GRTP1	-0.095106558	1
ENSG00000225083	GRTP1-AS1	-1.82447094	0.038075193
ENSG00000105447	GRWD1	0.43674927	0.000242039
ENSG00000215203	GRXCR1	-3.437355675	0.530426505
ENSG00000204928	GRXCR2	-1.790042574	1
ENSG00000133937	GSC	0.032226402	1
ENSG00000063515	GSC2	0	1
ENSG00000167914	GSDMA	1.30382727	0.330979116
ENSG00000073605	GSDMB	0.117867017	1
ENSG00000147697	GSDMC	1.097063152	1
ENSG00000104518	GSDMD	-1.103353741	6.35E-24
ENSG00000131149	GSE1	0.127109639	0.684485121
ENSG00000111305	GSG1	-0.741590428	0.603594755
ENSG00000169181	GSG1L	-0.125555146	1
ENSG00000177602	GSG2	0.285227699	0.296592511
ENSG00000105723	GSK3A	0.414830204	0.001824138
ENSG00000082701	GSK3B	-0.32749991	0.016312454
ENSG00000100744	GSKIP	0.088050919	1
ENSG00000148180	GSN	-0.882550315	3.97E-09
ENSG00000235865	GSN-AS1	-1.201541232	0.216165772
ENSG00000103342	GSPT1	0.38630091	0.000524818
ENSG00000189369	GSPT2	0.17480261	0.588943049
ENSG00000104687	GSR	0.188028017	0.321020454
ENSG00000100983	GSS	-0.21471896	0.234959221
ENSG00000243955	GSTA1	-0.596600311	1
ENSG00000244067	GSTA2	0.178022184	1
ENSG00000174156	GSTA3	-1.097617462	1
ENSG00000170899	GSTA4	-0.226279683	0.759355553
ENSG00000182793	GSTA5	1.968408083	1
ENSG00000223622	GSTA6P	-1.790042574	1
ENSG00000237674	GSTA7P	0	1
ENSG00000138780	GSTCD	0.17334325	0.699538208
ENSG00000197448	GSTK1	-0.561962254	0.001100388
ENSG00000134184	GSTM1	-1.318585685	0.018539491
ENSG00000213366	GSTM2	-1.187111997	0.000687686
ENSG00000218803	GSTM2P1	-2.400334078	0.000825576
ENSG00000134202	GSTM3	0.706938367	0.007891956
ENSG00000227693	GSTM3P1	0.049780258	1
ENSG00000226878	GSTM3P2	2.771679111	1
ENSG00000168765	GSTM4	-0.968500945	6.58E-07
ENSG00000134201	GSTM5	-0.693760196	1
ENSG00000236062	GSTM5P1	-1.393197744	0.881088702
ENSG00000148834	GSTO1	-0.207189985	0.440450542
ENSG00000065621	GSTO2	0.298986894	0.699086336
ENSG00000232829	GSTO3P	-0.000931745	1
ENSG00000084207	GSTP1	-0.110394854	0.790029346
ENSG00000257569	GSTP1P1	0.062308393	1
ENSG00000184674	GSTT1	-0.752027835	1.77E-06
ENSG00000099984	GSTT2	-0.031458159	1
ENSG00000133433	GSTT2B	0.084730942	1
ENSG00000241850	GSTTP1	-1.789943949	1
ENSG00000239334	GSTTP2	0.207210871	1
ENSG00000100577	GSTZ1	-0.687955052	8.28E-06
ENSG00000169840	GSX1	-1.789943949	1
ENSG00000180613	GSX2	0.115374322	1
ENSG00000121964	GTDC1	-0.156879507	1
ENSG00000144647	GTDC2	0.20320441	0.286441313
ENSG00000165417	GTF2A1	0.124585621	0.940890585
ENSG00000242441	GTF2A1L	-1.007254673	0.158836836
ENSG00000140307	GTF2A2	0.309452271	0.045429894
ENSG00000137947	GTF2B	0.322456038	0.116811161
ENSG00000153767	GTF2E1	0.821811347	1.17E-08
ENSG00000197265	GTF2E2	0.399255468	0.008426185
ENSG00000125651	GTF2F1	0.329024769	0.009338941
ENSG00000188342	GTF2F2	-0.126518873	0.942525407
ENSG00000251254	GTF2F2P1	0.568686748	0.460128212
ENSG00000233910	GTF2F2P2	0	1
ENSG00000110768	GTF2H1	0.462347727	0.000960537
ENSG00000145736	GTF2H2	0.314533811	0.066326234
ENSG00000226259	GTF2H2B	0.349776547	0.079447156
ENSG00000183474	GTF2H2C	0.398123581	0.018927407
ENSG00000111358	GTF2H3	0.130594493	0.973254351
ENSG00000213780	GTF2H4	0.411784061	0.005379175
ENSG00000221974	GTF2H4	0	1
ENSG00000226384	GTF2H4	0	1
ENSG00000233149	GTF2H4	0	1
ENSG00000234370	GTF2H4	0	1
ENSG00000236895	GTF2H4	0	1
ENSG00000185068	GTF2H5	-0.305848123	0.293761247
ENSG00000077809	GTF2I	-0.364221957	0.005906239
ENSG00000232561	GTF2IP1	-0.477181514	0.000526072
ENSG00000226930	GTF2IP2	-0.724007156	1
ENSG00000187721	GTF2IP3	0.021883268	1
ENSG00000006704	GTF2IRD1	-0.307192878	0.065086989
ENSG00000230583	GTF2IRD1P1	0.527864469	0.144850227
ENSG00000196275	GTF2IRD2	-0.545182703	0.319825531
ENSG00000174428	GTF2IRD2B	-0.71055222	0.057560229
ENSG00000214544	GTF2IRD2P1	-0.24046503	1
ENSG00000122034	GTF3A	0.245475925	0.120916169
ENSG00000077235	GTF3C1	0.42956961	0.000137149
ENSG00000115207	GTF3C2	0.140303536	0.586128595
ENSG00000119041	GTF3C3	0.259117034	0.144136633
ENSG00000125484	GTF3C4	0.427802967	0.000346213
ENSG00000148308	GTF3C5	0.046174652	1
ENSG00000155115	GTF3C6	-6.02E-05	1
ENSG00000100226	GTPBP1	0.039571859	1
ENSG00000105793	GTPBP10	0.638893699	4.10E-05
ENSG00000172432	GTPBP2	-0.319126823	0.016222634
ENSG00000130299	GTPBP3	0.493944647	0.000618855
ENSG00000107937	GTPBP4	0.396067394	0.004187674
ENSG00000101181	GTPBP5	0.482646753	6.08E-05
ENSG00000178605	GTPBP6	0.211409559	0.862224843
ENSG00000163607	GTPBP8	0.061926778	1
ENSG00000075218	GTSE1	-0.754755669	6.75E-12
ENSG00000170627	GTSF1	-0.080728735	1
ENSG00000124196	GTSF1L	0	1
ENSG00000048545	GUCA1A	0.596300535	1
ENSG00000112599	GUCA1B	1.107865126	0.026611509
ENSG00000138472	GUCA1C	-0.693312012	1
ENSG00000197273	GUCA2A	0	1
ENSG00000044012	GUCA2B	0	1
ENSG00000138867	GUCD1	-0.356379795	0.003901827
ENSG00000152402	GUCY1A2	-0.091141762	1
ENSG00000164116	GUCY1A3	-0.070772729	1
ENSG00000123201	GUCY1B2	-1.120748356	0.136399536
ENSG00000061918	GUCY1B3	-0.63682095	0.436609959
ENSG00000070019	GUCY2C	0.667669907	0.610076568
ENSG00000132518	GUCY2D	-1.205903879	0.922847702
ENSG00000204529	GUCY2EP	-2.565017808	1
ENSG00000101890	GUCY2F	-1.906269012	0.333043958
ENSG00000243316	GUCY2GP	1.699168607	0.597492478
ENSG00000151806	GUF1	0.323826296	0.039261538
ENSG00000143774	GUK1	0.103473421	0.969526428
ENSG00000234770	GULOP	-1.468498011	1
ENSG00000144366	GULP1	0.501649275	0.011866509
ENSG00000169919	GUSB	-0.043860142	1
ENSG00000183666	GUSBP1	0.39537255	0.010762083
ENSG00000224723	GUSBP10	-0.070577022	1
ENSG00000228315	GUSBP11	0.542932817	4.23E-05
ENSG00000169325	GUSBP12	1.968064759	1
ENSG00000241549	GUSBP2	0.283761566	0.937492299
ENSG00000253203	GUSBP3	-0.012552413	1
ENSG00000239650	GUSBP4	0.441924764	0.839452475
ENSG00000236296	GUSBP5	0.936607813	1.25E-06
ENSG00000224458	GUSBP6	0.20757309	1
ENSG00000227762	GUSBP8	0.64255758	0.982476131
ENSG00000215630	GUSBP9	0.030788876	1
ENSG00000254838	GVINP1	0.683203764	0.584003536
ENSG00000254781	GVINP2	0	1
ENSG00000151233	GXYLT1	-0.334939475	0.026097209
ENSG00000230931	GXYLT1P1	0.104546727	1
ENSG00000224860	GXYLT1P2	-0.728223841	1
ENSG00000172986	GXYLT2	-0.998874408	4.63E-18
ENSG00000163754	GYG1	0.171456963	0.625967064
ENSG00000251633	GYG1P1	0.245019208	1
ENSG00000237099	GYG1P2	1.09644153	1
ENSG00000231095	GYG1P3	0.557747916	0.339372297
ENSG00000056998	GYG2	-1.276554211	2.39E-06
ENSG00000235483	GYG2-AS1	-1.382891521	0.37811862
ENSG00000206159	GYG2P1	0.222967607	1
ENSG00000165905	GYLTL1B	0.506425767	2.48E-05
ENSG00000170180	GYPA	0.227980256	1
ENSG00000250361	GYPB	1.147130757	0.283729648
ENSG00000136732	GYPC	3.284414846	0.839452475
ENSG00000197465	GYPE	-0.869797278	0.619134739
ENSG00000104812	GYS1	0.18430053	0.362722353
ENSG00000111713	GYS2	-0.601473331	1
ENSG00000125812	GZF1	0.212302207	0.420806223
ENSG00000145649	GZMA	1.968064759	1
ENSG00000249454	GZMAP1	-0.017301796	1
ENSG00000100453	GZMB	0	1
ENSG00000100450	GZMH	1.968408083	1
ENSG00000113088	GZMK	1.095744522	1
ENSG00000197540	GZMM	-0.206953186	1
ENSG00000130600	H19	-0.410883267	0.617681334
ENSG00000189060	H1F0	-1.41965579	2.62E-47
ENSG00000187166	H1FNT	0	1
ENSG00000178804	H1FOO	0.17757022	1
ENSG00000184897	H1FX	-0.96878264	2.75E-21
ENSG00000206417	H1FX-AS1	-1.039782437	1.56E-22
ENSG00000198082	H2AFB1	-0.597051498	1
ENSG00000198307	H2AFB2	-1.789943949	1
ENSG00000185978	H2AFB3	0.980902271	1
ENSG00000246705	H2AFJ	-0.473954303	0.355780611
ENSG00000105968	H2AFV	-0.747617747	8.96E-12
ENSG00000188486	H2AFX	-0.651443669	7.74E-10
ENSG00000113648	H2AFY	-0.025255049	1
ENSG00000099284	H2AFY2	-0.963758559	1.75E-08
ENSG00000164032	H2AFZ	-0.403848966	0.000138745
ENSG00000213440	H2AFZP1	-0.439342378	0.007367941
ENSG00000218502	H2AFZP3	-0.421124248	0.000725677
ENSG00000255329	H2AFZP4	-0.53469888	0.011205533
ENSG00000234612	H2AFZP5	-1.7565622	0.170430629
ENSG00000233733	H2AFZP6	-2.565017808	1
ENSG00000101812	H2BFM	-1.415552273	0.688581822
ENSG00000234289	H2BFS	0.778194761	6.72E-11
ENSG00000123569	H2BFWT	0	1
ENSG00000233320	H2BFXP	-2.56466507	1
ENSG00000163041	H3F3A	-0.244255978	0.340312741
ENSG00000259389	H3F3AP1	-2.565017808	1
ENSG00000230618	H3F3AP3	0.47078398	1
ENSG00000235655	H3F3AP4	-0.364560283	0.045889356
ENSG00000226881	H3F3AP5	-0.407346074	1
ENSG00000178458	H3F3AP6	-0.338364259	0.046894258
ENSG00000132475	H3F3B	-0.016100156	1
ENSG00000236534	H3F3BP1	-0.113397422	1
ENSG00000265541	H3F3BP2	0	1
ENSG00000188375	H3F3C	-0.030462184	1
ENSG00000049239	H6PD	-1.379264584	7.95E-21
ENSG00000162882	HAAO	-0.510938107	1
ENSG00000148702	HABP2	1.968408083	1
ENSG00000130956	HABP4	-0.096017594	1
ENSG00000085382	HACE1	0.100305304	1
ENSG00000131373	HACL1	0.419561878	0.03709363
ENSG00000138796	HADH	0.023638459	1
ENSG00000084754	HADHA	-0.156105428	0.427608621
ENSG00000251596	HADHAP1	-0.003339436	1
ENSG00000138029	HADHB	-0.229844057	0.147949084
ENSG00000063854	HAGH	-0.250866551	0.530426505
ENSG00000103253	HAGHL	0.228327035	0.250206967
ENSG00000084110	HAL	0.021495933	1
ENSG00000105697	HAMP	-1.098371521	1
ENSG00000113196	HAND1	0	1
ENSG00000164107	HAND2	0.232675209	0.922847702
ENSG00000101323	HAO1	0.59545954	1
ENSG00000116882	HAO2	0.218390621	1
ENSG00000230921	HAO2-IT1	0	1
ENSG00000173805	HAP1	0.086059344	1
ENSG00000145681	HAPLN1	-2.607098566	1.11E-26
ENSG00000132702	HAPLN2	1.072565373	0.139833432
ENSG00000140511	HAPLN3	-0.15145923	0.803565461
ENSG00000187664	HAPLN4	0.982126988	1
ENSG00000225978	HAR1A	0.414215681	1
ENSG00000231133	HAR1B	1.166585717	0.881088702
ENSG00000180423	HARBI1	0.074084534	1
ENSG00000170445	HARS	0.463867863	3.49E-05
ENSG00000112855	HARS2	-0.340012093	0.028211036
ENSG00000105509	HAS1	-0.295100492	1
ENSG00000170961	HAS2	0.436342907	1
ENSG00000248690	HAS2-AS1	1.643172019	0.922847702
ENSG00000103044	HAS3	-0.278587802	0.162643672
ENSG00000128708	HAT1	-0.184587676	0.391282829
ENSG00000152240	HAUS1	-0.510606841	0.063683823
ENSG00000251453	HAUS1P1	-0.742578298	0.532376554
ENSG00000224224	HAUS1P2	-0.434513541	0.966590581
ENSG00000253226	HAUS1P3	-2.008432536	0.783919238
ENSG00000137814	HAUS2	0.409222412	0.018701453
ENSG00000214367	HAUS3	0.046333968	1
ENSG00000092036	HAUS4	-0.948987478	1.58E-08
ENSG00000226967	HAUS4P1	-2.5628427	0.000410738
ENSG00000249115	HAUS5	-0.294219784	0.136419508
ENSG00000147874	HAUS6	0.229135109	0.352626805
ENSG00000227344	HAUS6P1	0.42551193	0.244758431
ENSG00000236121	HAUS6P2	0.217901195	1
ENSG00000213397	HAUS7	0.342612266	0.018645041
ENSG00000131351	HAUS8	-0.02077957	1
ENSG00000257300	HAUS8P1	0	1
ENSG00000113249	HAVCR1	0.789471234	1
ENSG00000268442	HAVCR1P1	0	1
ENSG00000135077	HAVCR2	-0.355508578	0.255645954
ENSG00000143575	HAX1	-0.098002851	1
ENSG00000206172	HBA1	0	1
ENSG00000188536	HBA2	0	1
ENSG00000244734	HBB	0	1
ENSG00000229988	HBBP1	0	1
ENSG00000223609	HBD	0	1
ENSG00000213931	HBE1	-0.089219149	1
ENSG00000113070	HBEGF	0.475847367	0.000643471
ENSG00000213934	HBG1	0	1
ENSG00000196565	HBG2	-0.875460655	3.70E-11
ENSG00000206177	HBM	0.216120273	1
ENSG00000105856	HBP1	-0.259795351	0.227211551
ENSG00000086506	HBQ1	0	1
ENSG00000112339	HBS1L	0.126368508	0.810759109
ENSG00000130656	HBZ	0	1
ENSG00000206178	HBZP1	0	1
ENSG00000196917	HCAR1	-0.171653178	1
ENSG00000182782	HCAR2	-0.666469004	1
ENSG00000255398	HCAR3	1.494030267	1
ENSG00000004961	HCCS	0.548095477	0.000909332
ENSG00000172534	HCFC1	0.219303852	0.104968011
ENSG00000235802	HCFC1-AS1	-2.565017808	1
ENSG00000103145	HCFC1R1	-0.84222403	4.02E-11
ENSG00000111727	HCFC2	0.136645716	1
ENSG00000232087	HCFC2P1	0	1
ENSG00000228223	HCG11	-0.270836505	0.427608621
ENSG00000224157	HCG14	0.178365508	1
ENSG00000227559	HCG14	0	1
ENSG00000230004	HCG14	0	1
ENSG00000234411	HCG14	0	1
ENSG00000236835	HCG14	0	1
ENSG00000237010	HCG14	0	1
ENSG00000224642	HCG15	0	1
ENSG00000225368	HCG15	0	1
ENSG00000227214	HCG15	-0.866443358	0.229306547
ENSG00000227380	HCG15	0	1
ENSG00000233035	HCG15	0	1
ENSG00000235405	HCG15	0	1
ENSG00000237898	HCG15	0	1
ENSG00000239675	HCG16	0	1
ENSG00000239940	HCG16	0	1
ENSG00000240111	HCG16	0	1
ENSG00000241124	HCG16	0	1
ENSG00000241408	HCG16	0	1
ENSG00000243286	HCG16	0	1
ENSG00000244349	HCG16	-0.077646016	1
ENSG00000236729	HCG17	0	1
ENSG00000240833	HCG17	0	1
ENSG00000240924	HCG17	0	1
ENSG00000241053	HCG17	0	1
ENSG00000241701	HCG17	0	1
ENSG00000244695	HCG17	0	1
ENSG00000224619	HCG18	0	1
ENSG00000224705	HCG18	0	1
ENSG00000228894	HCG18	0	1
ENSG00000230660	HCG18	0	1
ENSG00000231074	HCG18	0.105369616	1
ENSG00000234893	HCG18	0	1
ENSG00000235727	HCG18	0	1
ENSG00000224486	HCG19P	0	1
ENSG00000227100	HCG19P	0	1
ENSG00000229149	HCG19P	0	1
ENSG00000234417	HCG19P	0	1
ENSG00000235561	HCG19P	0	1
ENSG00000235877	HCG19P	0	1
ENSG00000236422	HCG19P	0	1
ENSG00000224133	HCG20	0	1
ENSG00000224641	HCG20	0	1
ENSG00000224923	HCG20	0	1
ENSG00000228022	HCG20	1.095086089	0.514854671
ENSG00000228762	HCG20	0	1
ENSG00000238216	HCG20	0	1
ENSG00000223454	HCG21	0	1
ENSG00000228448	HCG21	0	1
ENSG00000230541	HCG21	0	1
ENSG00000233529	HCG21	-2.564566651	1
ENSG00000235747	HCG21	0	1
ENSG00000225629	HCG22	0	1
ENSG00000227974	HCG22	0	1
ENSG00000228147	HCG22	0	1
ENSG00000228789	HCG22	0	1
ENSG00000229501	HCG22	0	1
ENSG00000237093	HCG22	0	1
ENSG00000237894	HCG22	0	1
ENSG00000238234	HCG22	0	1
ENSG00000224507	HCG23	0	1
ENSG00000225834	HCG23	0	1
ENSG00000226228	HCG23	0	1
ENSG00000228738	HCG23	0	1
ENSG00000228962	HCG23	-0.569183479	0.970311513
ENSG00000229903	HCG23	0	1
ENSG00000230602	HCG23	0	1
ENSG00000235135	HCG23	0	1
ENSG00000230134	HCG24	0	1
ENSG00000230313	HCG24	1.968408083	1
ENSG00000233043	HCG24	0	1
ENSG00000237196	HCG24	0	1
ENSG00000238100	HCG24	0	1
ENSG00000224096	HCG25	0	1
ENSG00000231037	HCG25	0	1
ENSG00000231343	HCG25	0	1
ENSG00000231573	HCG25	0	1
ENSG00000232940	HCG25	-0.245874312	0.355943579
ENSG00000233772	HCG25	0	1
ENSG00000238064	HCG25	0	1
ENSG00000206344	HCG27	-1.777210294	3.50E-06
ENSG00000220890	HCG27	0	1
ENSG00000223577	HCG27	0	1
ENSG00000231281	HCG27	0	1
ENSG00000232758	HCG27	0	1
ENSG00000234079	HCG27	0	1
ENSG00000238148	HCG27	0	1
ENSG00000176998	HCG4	-0.143836112	1
ENSG00000224564	HCG4	0	1
ENSG00000225346	HCG4	0	1
ENSG00000226379	HCG4	0	1
ENSG00000228706	HCG4	0	1
ENSG00000235317	HCG4	0	1
ENSG00000236225	HCG4	0	1
ENSG00000237905	HCG4	0	1
ENSG00000224921	HCG4P11	0	1
ENSG00000225864	HCG4P11	-0.224992168	1
ENSG00000229573	HCG4P11	0	1
ENSG00000233617	HCG4P11	0	1
ENSG00000233935	HCG4P11	0	1
ENSG00000236881	HCG4P11	0	1
ENSG00000249663	HCG4P11	0	1
ENSG00000223798	HCG4P3	0	1
ENSG00000223892	HCG4P3	0	1
ENSG00000224006	HCG4P3	0	1
ENSG00000225086	HCG4P3	0	1
ENSG00000227025	HCG4P3	0	1
ENSG00000231385	HCG4P3	0	1
ENSG00000237669	HCG4P3	-0.220194821	1
ENSG00000237884	HCG4P3	0	1
ENSG00000223708	HCG4P5	0	1
ENSG00000225114	HCG4P5	0	1
ENSG00000226109	HCG4P5	0	1
ENSG00000227766	HCG4P5	-0.185620625	0.600810763
ENSG00000228921	HCG4P5	0	1
ENSG00000231067	HCG4P5	0	1
ENSG00000234831	HCG4P5	0	1
ENSG00000235952	HCG4P5	0	1
ENSG00000225120	HCG4P7	0	1
ENSG00000226152	HCG4P7	0	1
ENSG00000226517	HCG4P7	0	1
ENSG00000226736	HCG4P7	0	1
ENSG00000228490	HCG4P7	0	1
ENSG00000230419	HCG4P7	0	1
ENSG00000230521	HCG4P7	-0.134701982	1
ENSG00000231197	HCG4P7	0	1
ENSG00000224801	HCG4P8	0	1
ENSG00000225023	HCG4P8	0	1
ENSG00000229142	HCG4P8	0.043578673	1
ENSG00000230504	HCG4P8	0	1
ENSG00000231430	HCG4P8	0	1
ENSG00000232122	HCG4P8	0	1
ENSG00000234681	HCG4P8	0	1
ENSG00000204625	HCG9	-0.440057922	1
ENSG00000206504	HCG9	0	1
ENSG00000227647	HCG9	0	1
ENSG00000234313	HCG9	0	1
ENSG00000234599	HCG9	0	1
ENSG00000236579	HCG9	0	1
ENSG00000237812	HCG9	0	1
ENSG00000224253	HCG9P5	0	1
ENSG00000226267	HCG9P5	0	1
ENSG00000227758	HCG9P5	0	1
ENSG00000228202	HCG9P5	0	1
ENSG00000228900	HCG9P5	0	1
ENSG00000235458	HCG9P5	0	1
ENSG00000236619	HCG9P5	0	1
ENSG00000101336	HCK	0.049131586	1
ENSG00000180353	HCLS1	0.492383509	1
ENSG00000164588	HCN1	0.377706257	0.703736425
ENSG00000099822	HCN2	0.165971001	0.855121632
ENSG00000143630	HCN3	0.13547758	1
ENSG00000138622	HCN4	-0.309079343	0.348305832
ENSG00000206337	HCP5	-0.298077406	0.040225309
ENSG00000227429	HCP5	0	1
ENSG00000230389	HCP5	0	1
ENSG00000237105	HCP5	0	1
ENSG00000161610	HCRT	0.71950619	1
ENSG00000121764	HCRTR1	0.100499757	1
ENSG00000137252	HCRTR2	0.417940609	1
ENSG00000126264	HCST	0.910971751	0.720076559
ENSG00000116478	HDAC1	-0.16481131	0.424053934
ENSG00000100429	HDAC10	0.140675804	0.788803945
ENSG00000163517	HDAC11	-0.872876728	1.96E-06
ENSG00000244502	HDAC11-AS1	0.218184037	1
ENSG00000196591	HDAC2	0.346409357	0.006014123
ENSG00000171720	HDAC3	0.161574898	0.515727653
ENSG00000068024	HDAC4	-0.048477532	1
ENSG00000108840	HDAC5	-0.770140281	2.04E-10
ENSG00000094631	HDAC6	-1.402719713	1.70E-27
ENSG00000061273	HDAC7	-0.537793147	4.94E-07
ENSG00000147099	HDAC8	-0.049065034	1
ENSG00000048052	HDAC9	-0.090226523	1
ENSG00000140287	HDC	1.493639466	1
ENSG00000111906	HDDC2	0.359066219	0.023336919
ENSG00000184508	HDDC3	-0.029176188	1
ENSG00000143321	HDGF	-0.195380794	0.181898025
ENSG00000112273	HDGFL1	-0.229708187	1
ENSG00000227183	HDGFP1	-0.397196688	0.312296549
ENSG00000130021	HDHD1	-0.192334583	0.951966136
ENSG00000234620	HDHD1P1	0.142246094	1
ENSG00000233792	HDHD1P2	1.968899115	1
ENSG00000214245	HDHD1P3	0	1
ENSG00000167220	HDHD2	-0.13242076	1
ENSG00000119431	HDHD3	-2.565017808	1
ENSG00000115677	HDLBP	-0.128021766	0.617681334
ENSG00000165259	HDX	0.156912517	0.841924164
ENSG00000119285	HEATR1	0.242839155	0.089303682
ENSG00000164818	HEATR2	0.400947075	0.000268566
ENSG00000155393	HEATR3	0.402179455	0.033453524
ENSG00000187105	HEATR4	0.016166333	1
ENSG00000129493	HEATR5A	-0.077306635	1
ENSG00000008869	HEATR5B	0.046795514	1
ENSG00000068097	HEATR6	0.100087705	1
ENSG00000013583	HEBP1	-0.338260168	0.055885846
ENSG00000051620	HEBP2	-0.230532754	0.307338287
ENSG00000112406	HECA	0.08184559	1
ENSG00000092148	HECTD1	0.257198895	0.073424372
ENSG00000165338	HECTD2	-0.244071432	0.491077744
ENSG00000126107	HECTD3	-0.116102255	0.859302931
ENSG00000173064	HECTD4	-0.170829539	0.530426505
ENSG00000002746	HECW1	-0.600852466	0.001234561
ENSG00000181211	HECW1-IT1	1.493688344	1
ENSG00000138411	HECW2	-0.1684604	1
ENSG00000173706	HEG1	-0.958818285	3.78E-21
ENSG00000127311	HELB	0.897121712	4.29E-06
ENSG00000119969	HELLS	-0.251384079	0.371067938
ENSG00000163312	HELQ	0.262862531	0.387553016
ENSG00000187821	HELT	3.284072842	0.839452475
ENSG00000198265	HELZ	0.29175329	0.033507051
ENSG00000130589	HELZ2	-1.065450973	9.38E-20
ENSG00000136929	HEMGN	0.178955165	1
ENSG00000114735	HEMK1	-0.20296435	0.578006347
ENSG00000162639	HENMT1	-0.070920201	1
ENSG00000165478	HEPACAM	1.494128893	1
ENSG00000188175	HEPACAM2	-1.790494539	1
ENSG00000089472	HEPH	-0.327918321	1
ENSG00000181333	HEPHL1	-0.33346412	1
ENSG00000221932	HEPN1	0	1
ENSG00000103657	HERC1	0.258381909	0.085985181
ENSG00000128731	HERC2	-0.243260831	0.059880858
ENSG00000259845	HERC2P10	-0.008778641	1
ENSG00000140181	HERC2P2	0.129870757	0.82278999
ENSG00000180229	HERC2P3	-0.045779893	1
ENSG00000230267	HERC2P4	-0.051147093	1
ENSG00000260644	HERC2P5	-0.142792901	0.912811752
ENSG00000259414	HERC2P7	-0.870310522	1
ENSG00000261599	HERC2P8	-0.164750596	1
ENSG00000206149	HERC2P9	-0.049905298	1
ENSG00000138641	HERC3	0.073050329	1
ENSG00000148634	HERC4	-0.116585251	0.916210872
ENSG00000138646	HERC5	0.441488168	1
ENSG00000138642	HERC6	-0.436588763	0.107704883
ENSG00000051108	HERPUD1	0.032592433	1
ENSG00000122557	HERPUD2	-0.1905709	0.686009069
ENSG00000114315	HES1	0.488609032	0.155643894
ENSG00000069812	HES2	0.206072569	1
ENSG00000173673	HES3	-1.790494539	1
ENSG00000188290	HES4	0	1
ENSG00000197921	HES5	-1.790042574	1
ENSG00000144485	HES6	1.026314043	7.02E-05
ENSG00000179111	HES7	3.44731311	4.97E-29
ENSG00000163666	HESX1	-1.07988027	0.490963645
ENSG00000213614	HEXA	-0.021221024	1
ENSG00000260339	HEXA-AS1	1.097074566	1
ENSG00000049860	HEXB	-0.192086069	0.510804659
ENSG00000169660	HEXDC	-0.47017479	0.010966437
ENSG00000186834	HEXIM1	-0.290398097	0.074368685
ENSG00000168517	HEXIM2	-0.368282686	0.684485121
ENSG00000164683	HEY1	0.630510191	0.005161567
ENSG00000135547	HEY2	0	1
ENSG00000163909	HEYL	-1.790042574	1
ENSG00000010704	HFE	3.661103427	0.530426505
ENSG00000168509	HFE2	-1.789943949	1
ENSG00000162669	HFM1	-0.212426788	0.126420641
ENSG00000113924	HGD	-0.970260706	1
ENSG00000019991	HGF	1.33956557	0.089493291
ENSG00000109758	HGFAC	-2.564566651	1
ENSG00000185359	HGS	0.459944786	1.19E-05
ENSG00000165102	HGSNAT	-0.55646089	0.00499105
ENSG00000054392	HHAT	-0.220951412	0.759355553
ENSG00000010282	HHATL	0.718565607	1
ENSG00000230970	HHATL-AS1	0.981184572	1
ENSG00000152804	HHEX	-1.789943949	1
ENSG00000164161	HHIP	1.075476819	0.0885106
ENSG00000248890	HHIP-AS1	0.165610836	1
ENSG00000182218	HHIPL1	-0.453425668	1
ENSG00000143512	HHIPL2	0.927897158	0.090228947
ENSG00000132297	HHLA1	-0.640366859	0.52030739
ENSG00000114455	HHLA2	-0.254940732	1
ENSG00000197568	HHLA3	-1.065055003	0.002192673
ENSG00000156875	HIAT1	-0.086889123	1
ENSG00000148110	HIATL1	0.016581504	1
ENSG00000196312	HIATL2	0.244756367	0.844124999
ENSG00000106049	HIBADH	-0.749353603	4.86E-07
ENSG00000198130	HIBCH	0.246770603	0.431610877
ENSG00000177374	HIC1	0.442472677	1
ENSG00000169635	HIC2	0.816958725	2.37E-11
ENSG00000167861	HID1	-1.09563448	0.0885106
ENSG00000100644	HIF1A	-0.085113052	1
ENSG00000258777	HIF1A-AS1	-0.022598351	1
ENSG00000258667	HIF1A-AS2	-0.089403055	1
ENSG00000166135	HIF1AN	0.084071705	1
ENSG00000258978	HIF1AP1	-0.117766164	1
ENSG00000124440	HIF3A	0.23248283	1
ENSG00000181061	HIGD1A	0.228562024	0.247064248
ENSG00000258016	HIGD1AP1	0.542836408	0.127205428
ENSG00000254455	HIGD1AP10	-0.062689196	1
ENSG00000227644	HIGD1AP11	0	1
ENSG00000236012	HIGD1AP12	-0.307104116	1
ENSG00000251019	HIGD1AP13	0	1
ENSG00000248785	HIGD1AP14	0.06776736	1
ENSG00000237005	HIGD1AP15	0.442254717	1
ENSG00000219608	HIGD1AP16	-0.722265034	1
ENSG00000258886	HIGD1AP17	0	1
ENSG00000253952	HIGD1AP18	0	1
ENSG00000237148	HIGD1AP2	0	1
ENSG00000248929	HIGD1AP3	2.77084622	1
ENSG00000233299	HIGD1AP4	-1.790042574	1
ENSG00000255254	HIGD1AP5	-0.275946359	1
ENSG00000253229	HIGD1AP6	0	1
ENSG00000237303	HIGD1AP8	0	1
ENSG00000258104	HIGD1AP9	0	1
ENSG00000131097	HIGD1B	0.134920559	1
ENSG00000214511	HIGD1C	-2.009083031	0.530426505
ENSG00000146066	HIGD2A	-0.205455433	0.307938884
ENSG00000175202	HIGD2B	-0.730268792	0.87943317
ENSG00000135245	HILPDA	0.168616674	0.92407003
ENSG00000188662	HILS1	-1.597533327	1
ENSG00000172273	HINFP	0.420359357	0.051757983
[truncated: 819,915 more chars]
